# Supplementary material for: Halogen activation in the plume of Masaya volcano: field observations and box model investigations
Source: Copernicus journal article supplement (doi:10.5194/acp-21-3371-2021), 2021-03-04

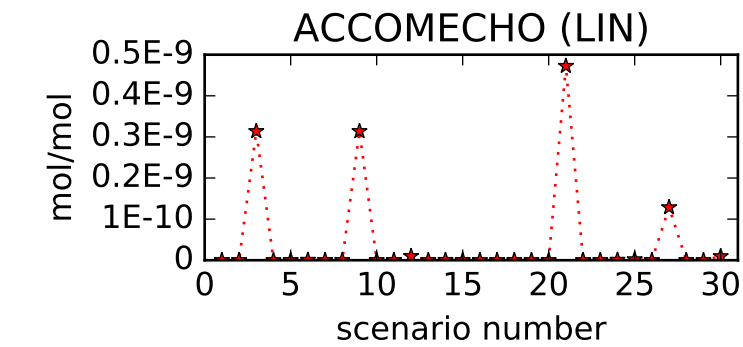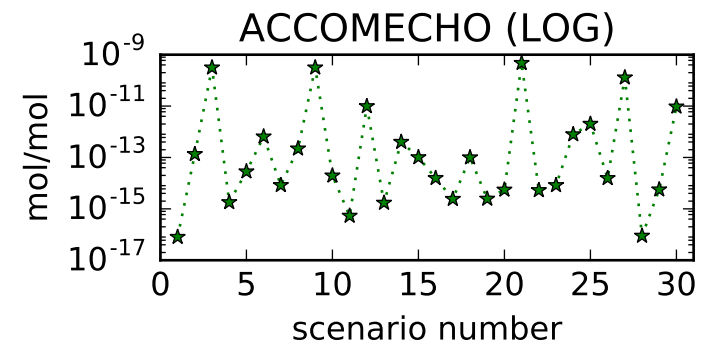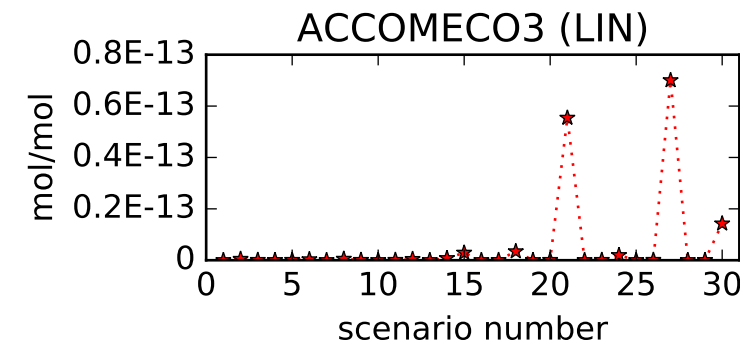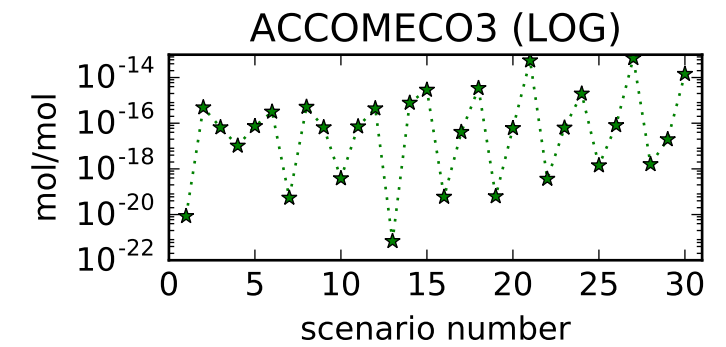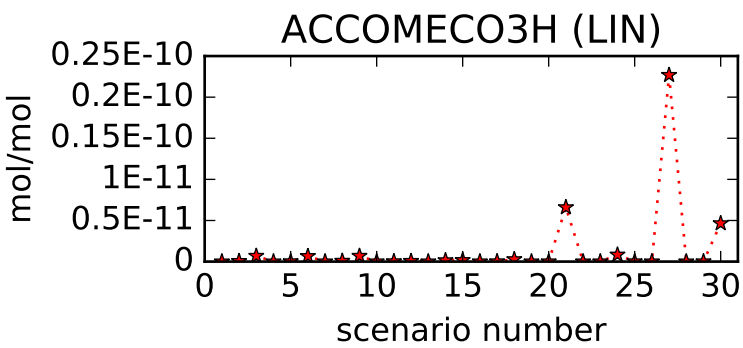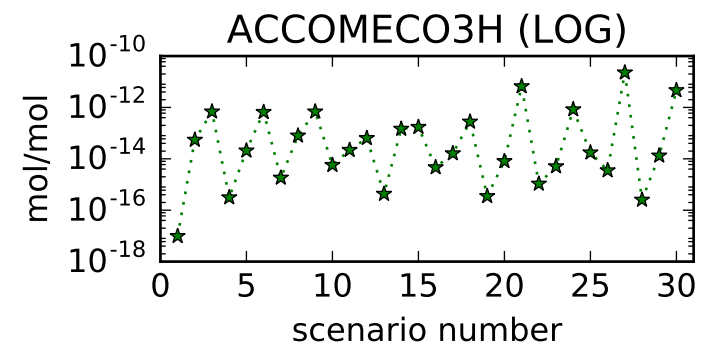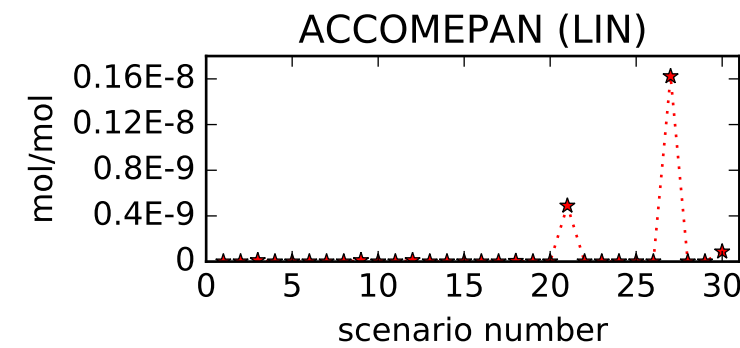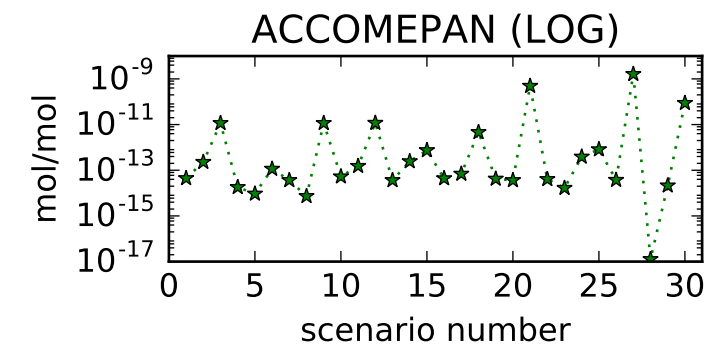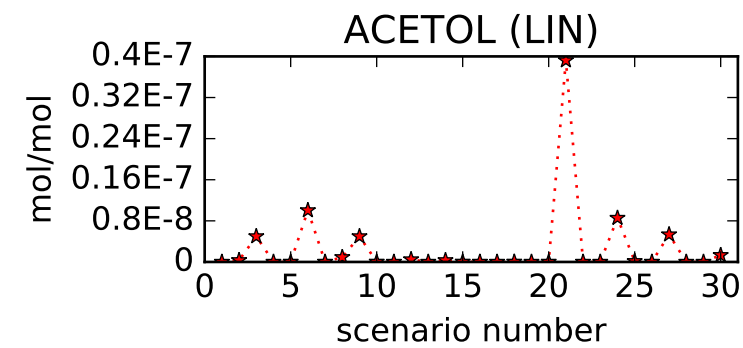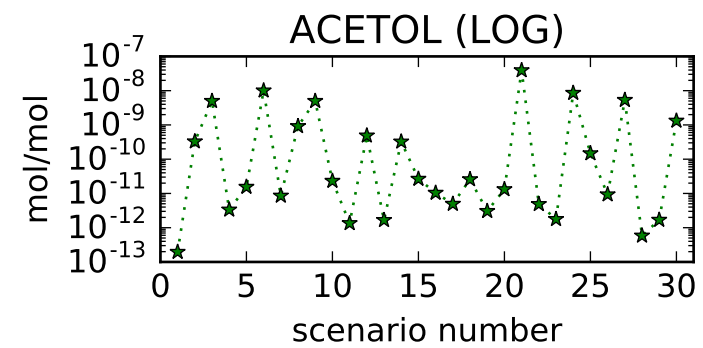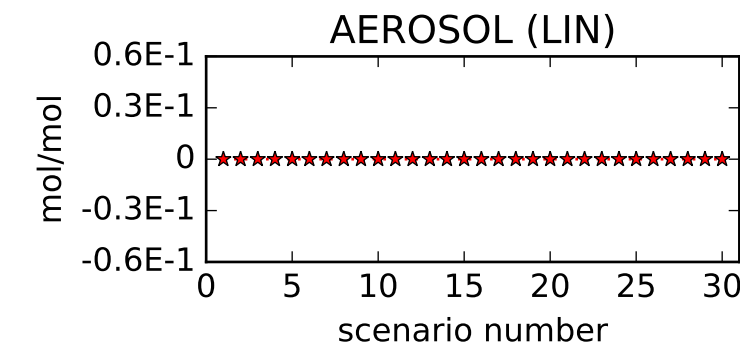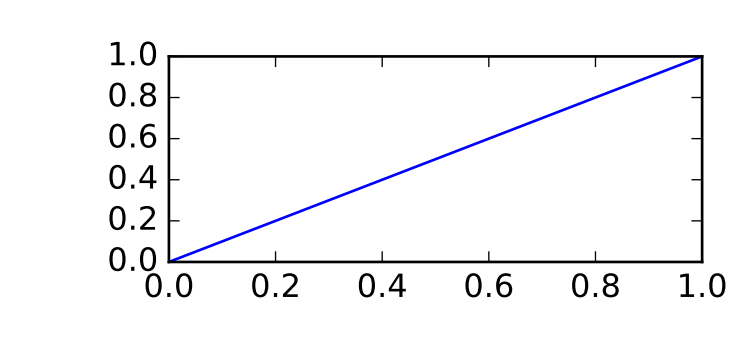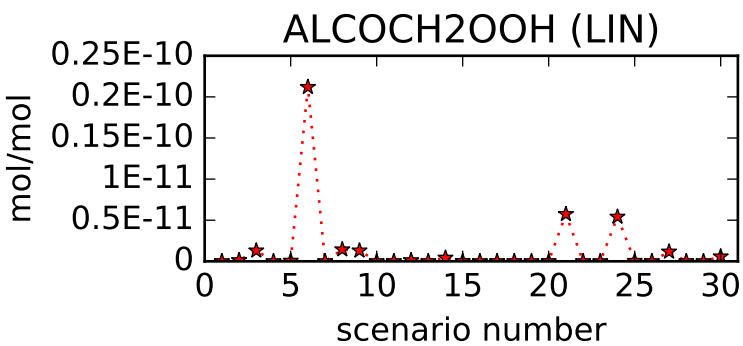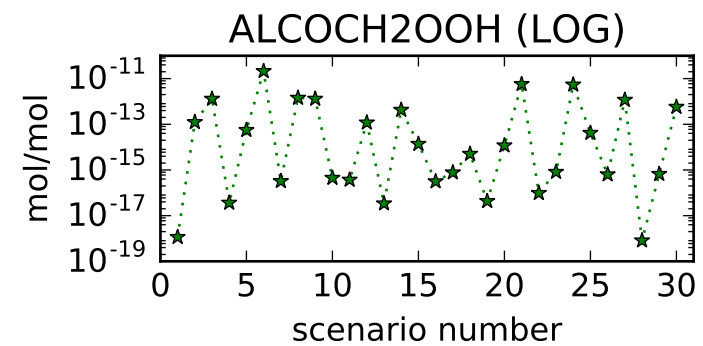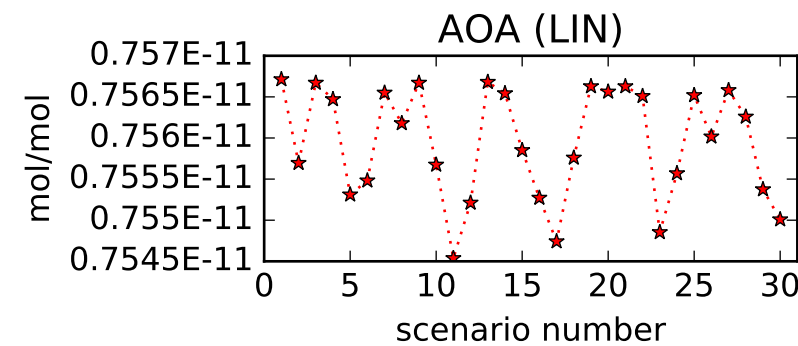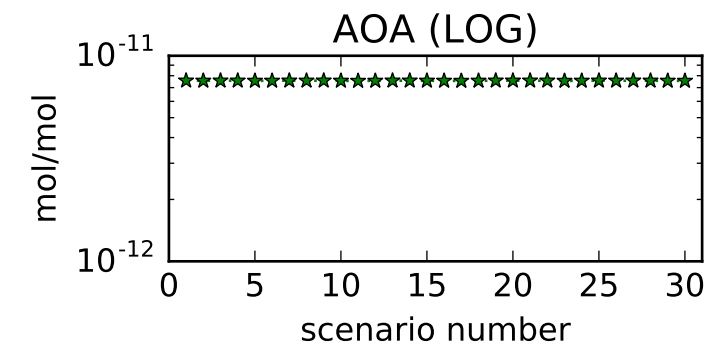

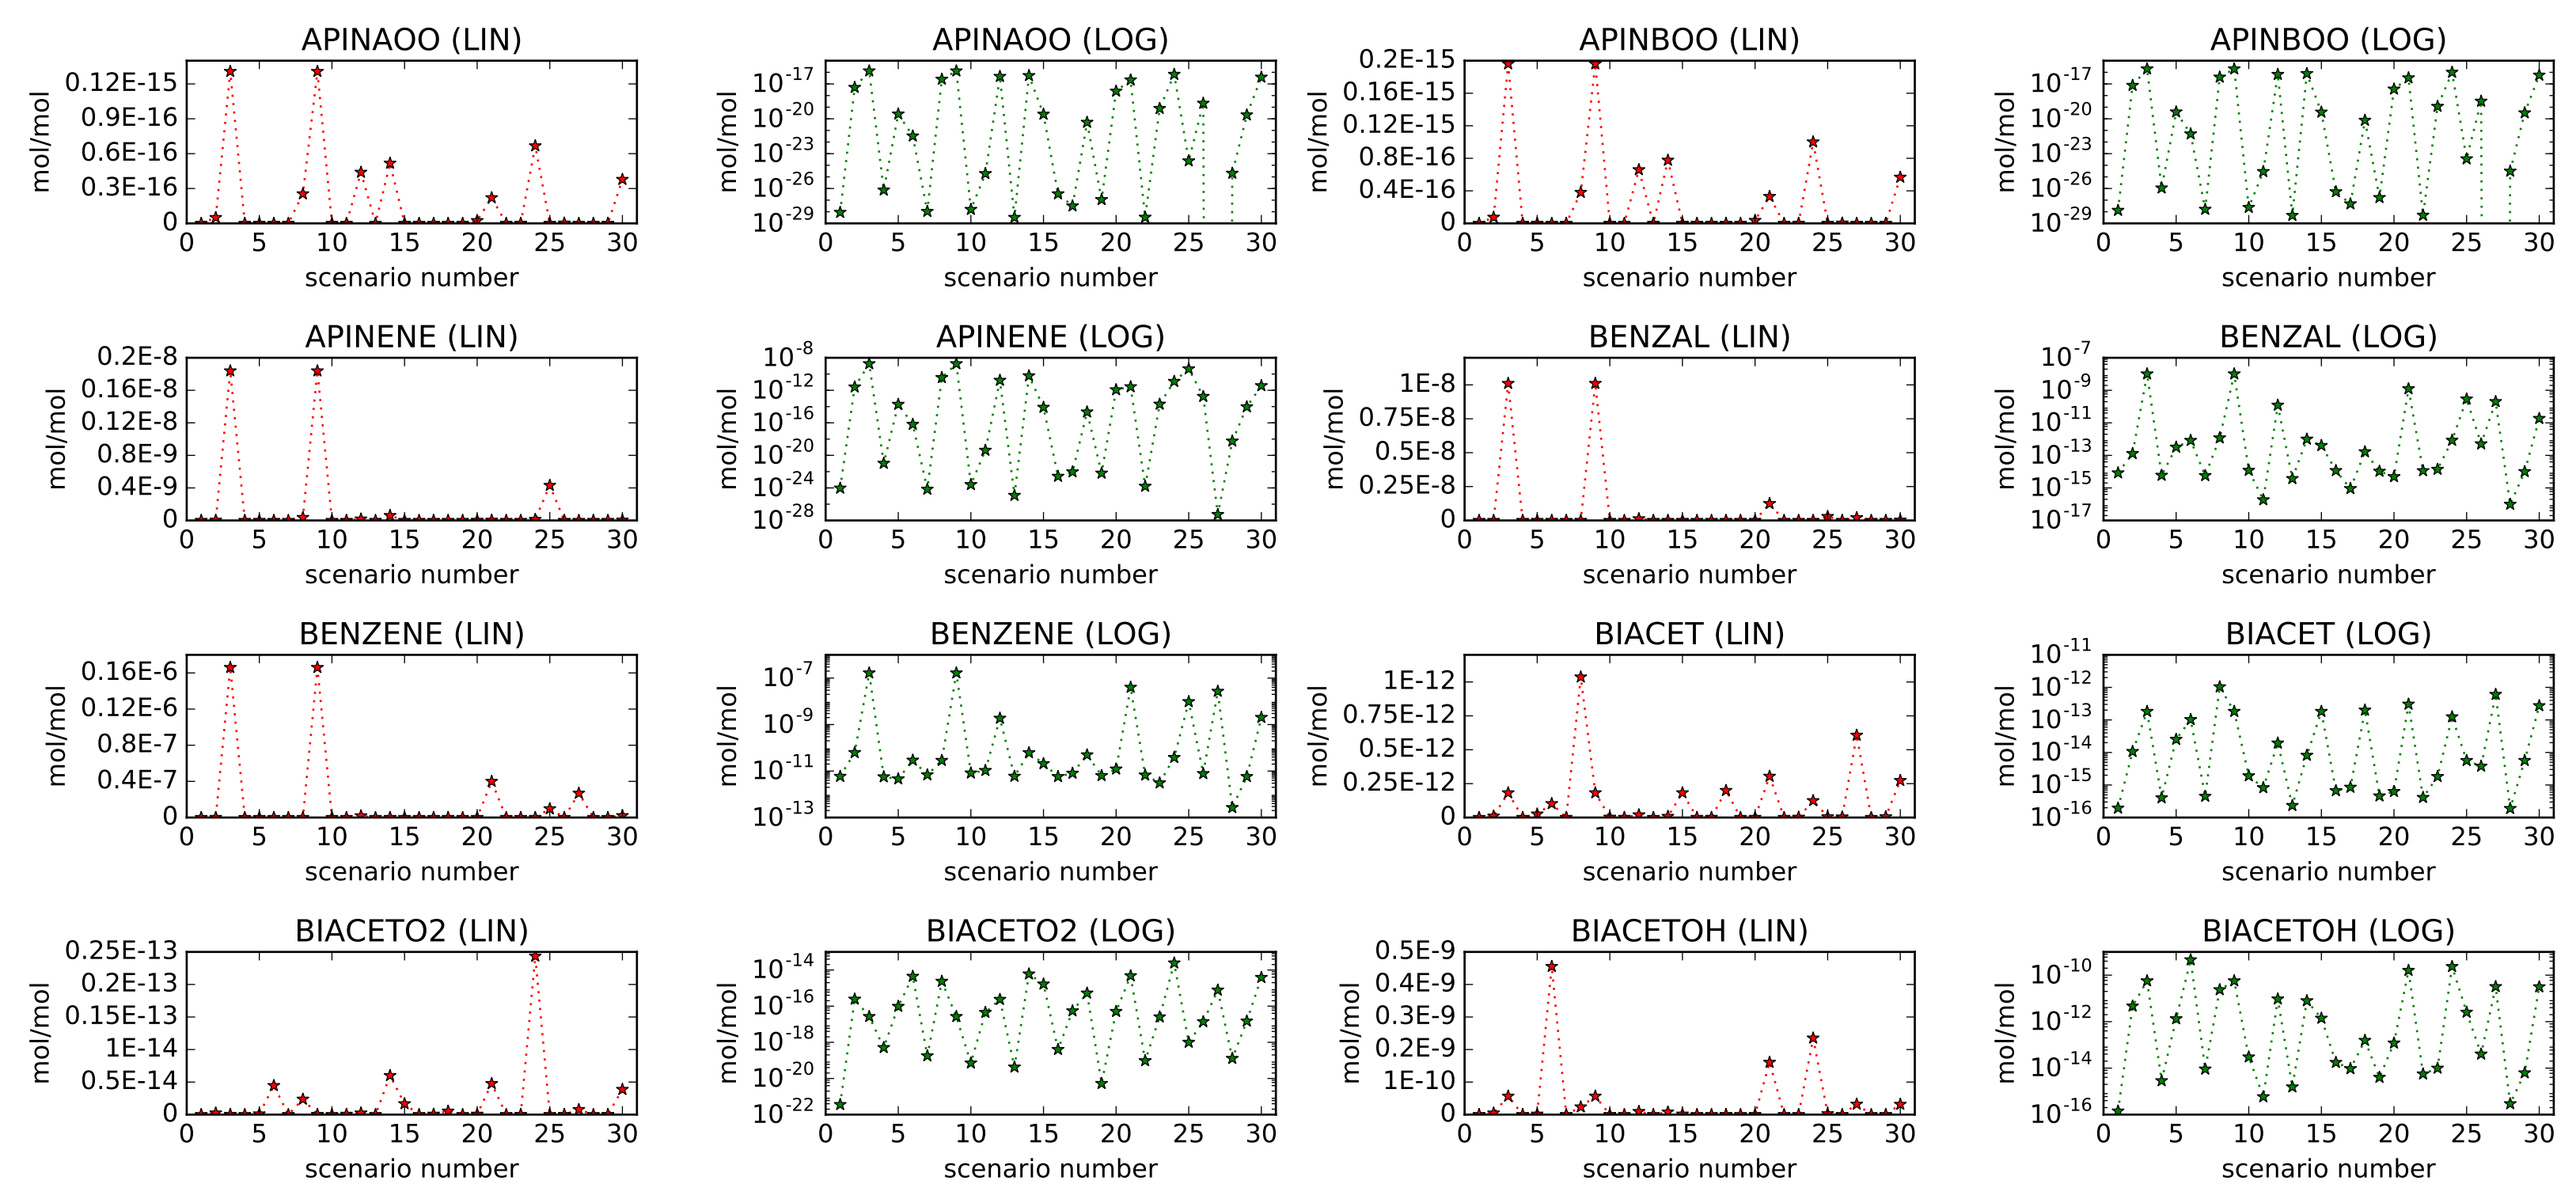

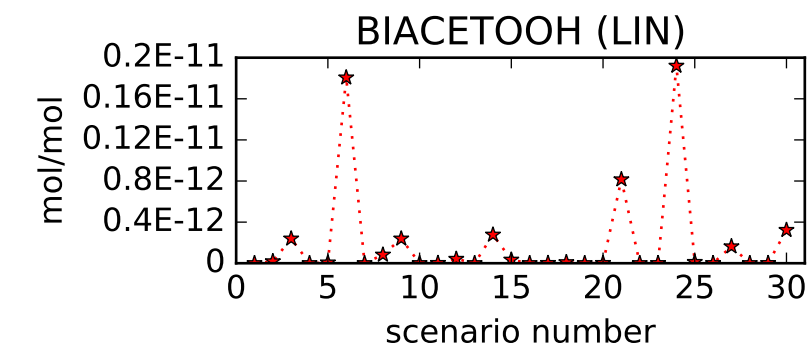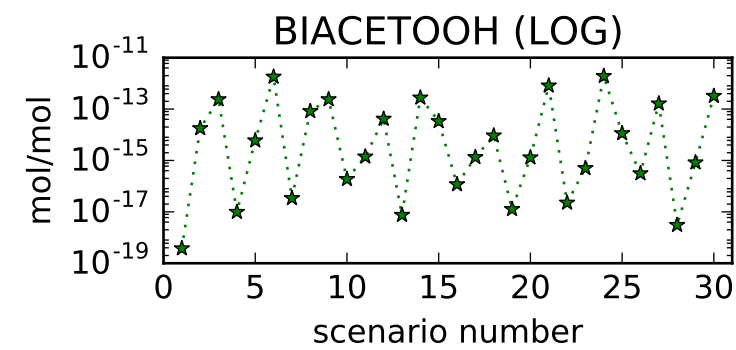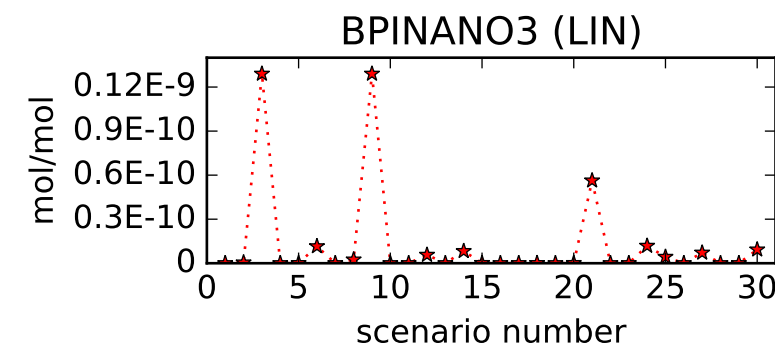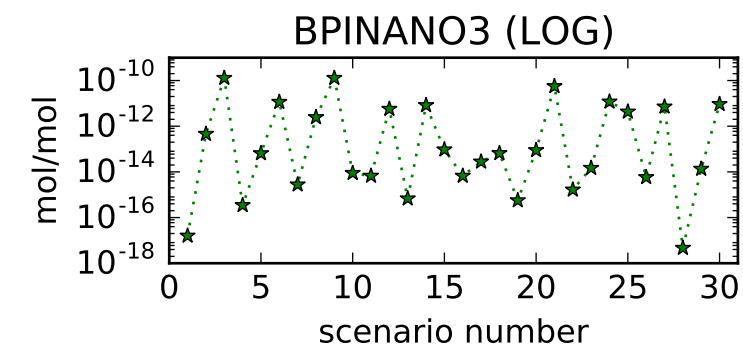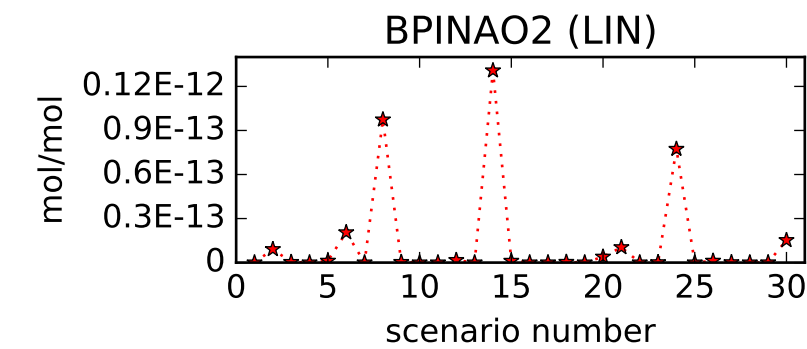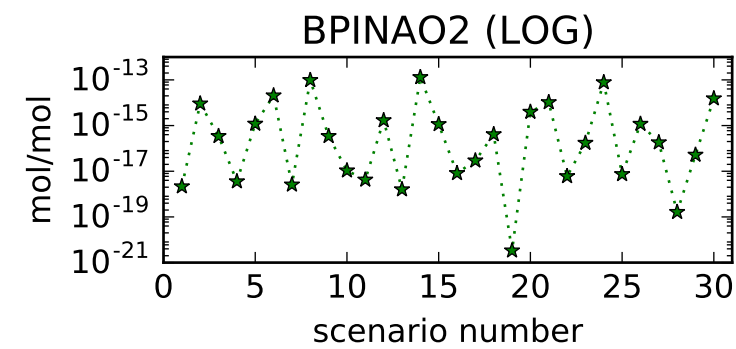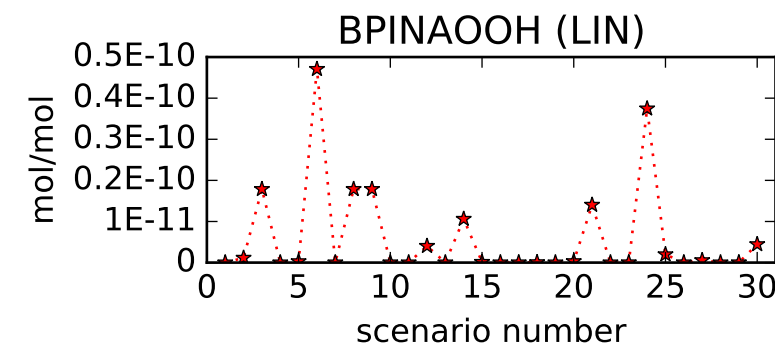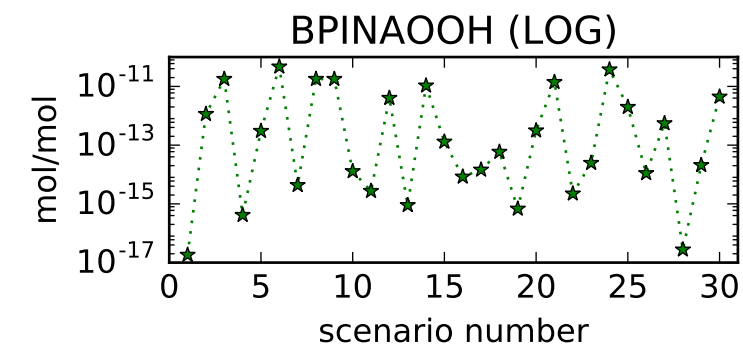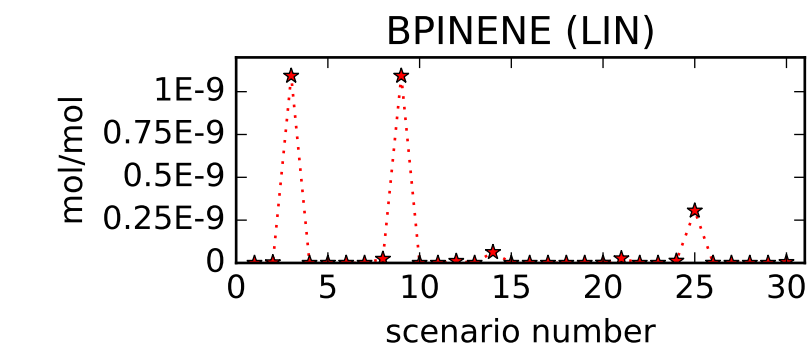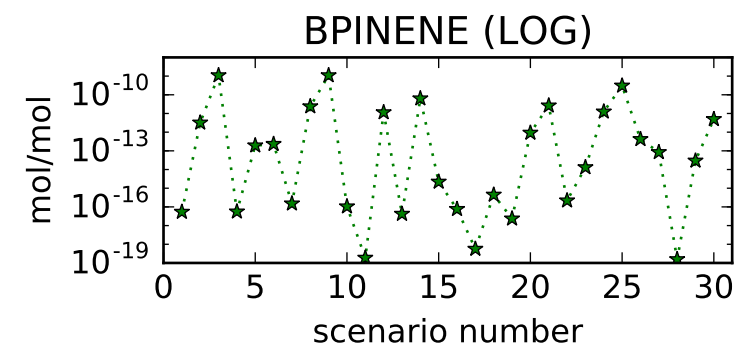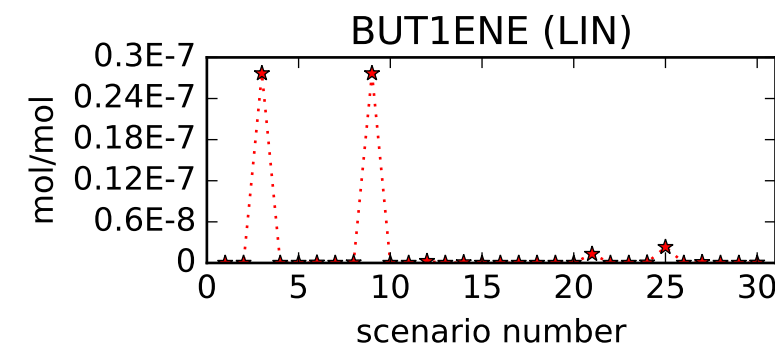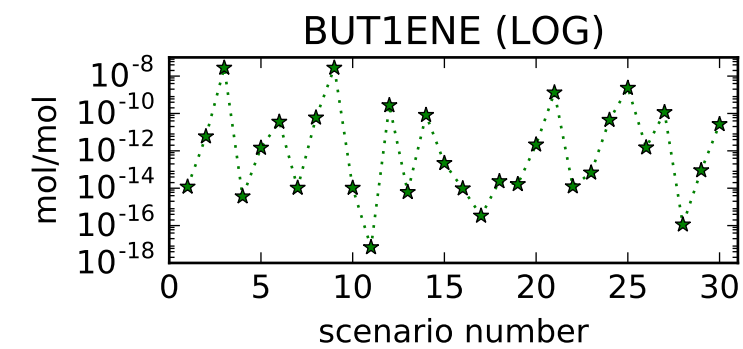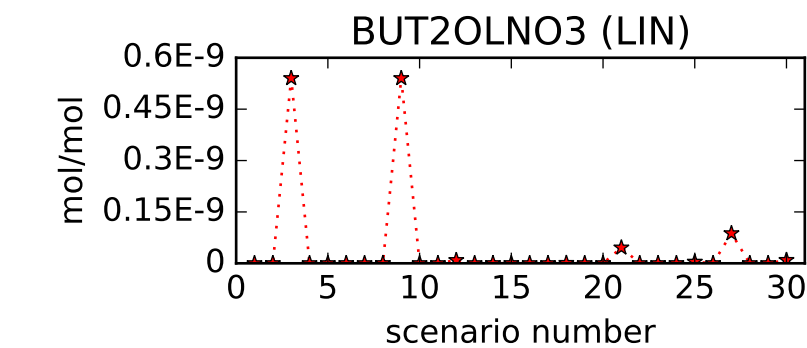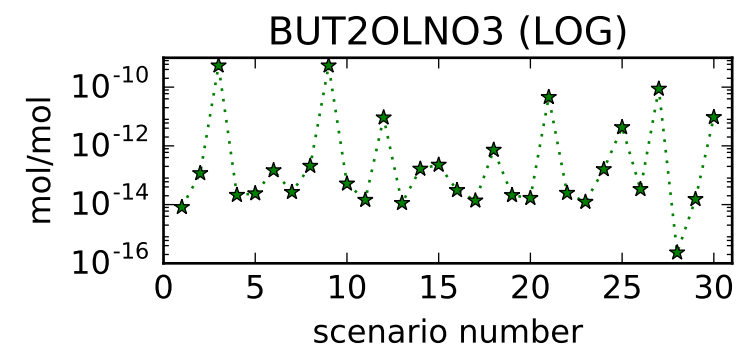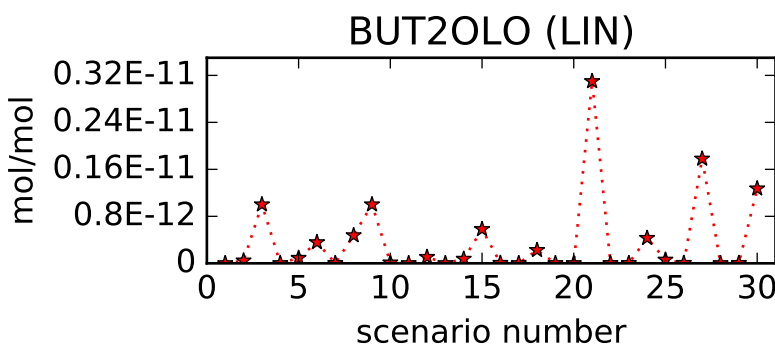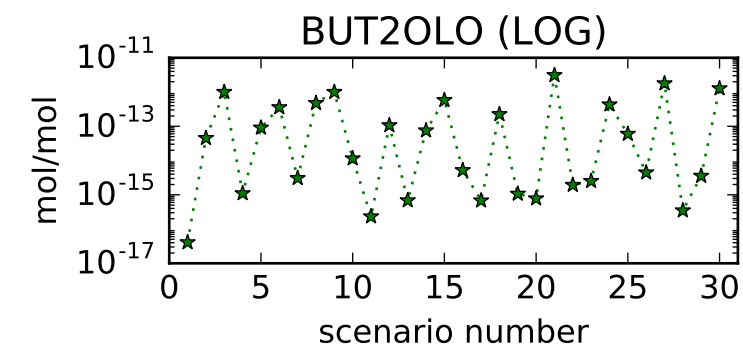

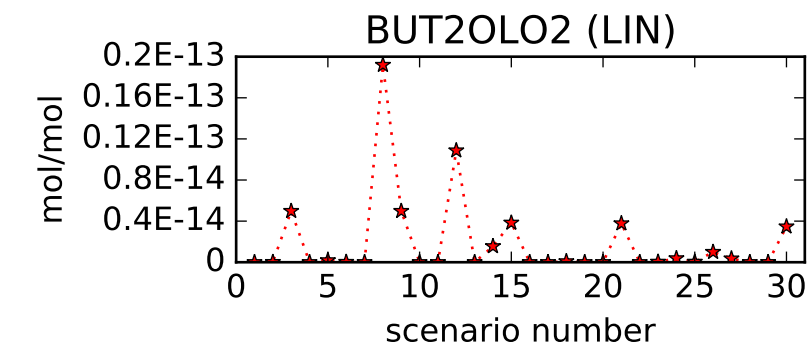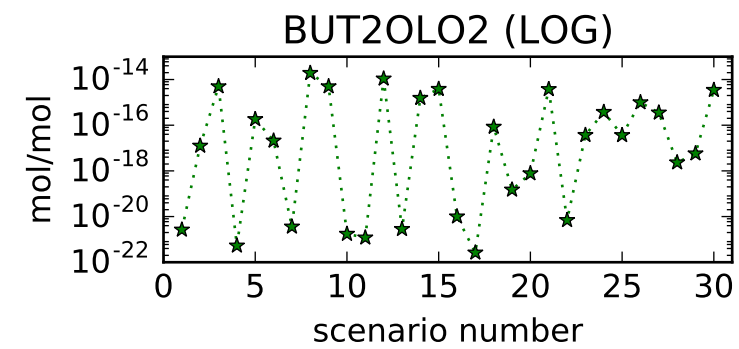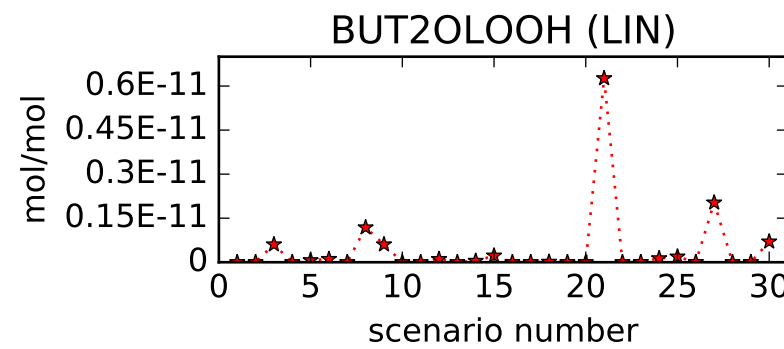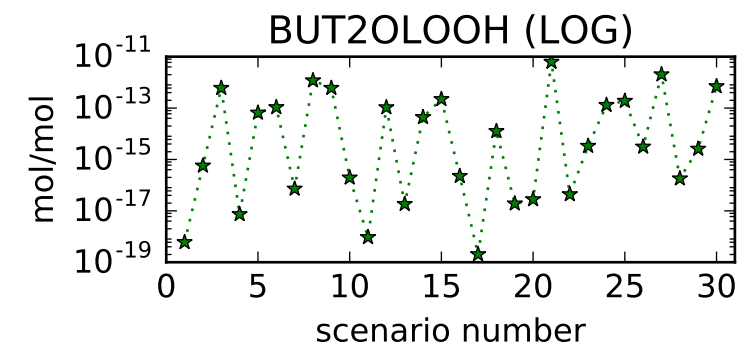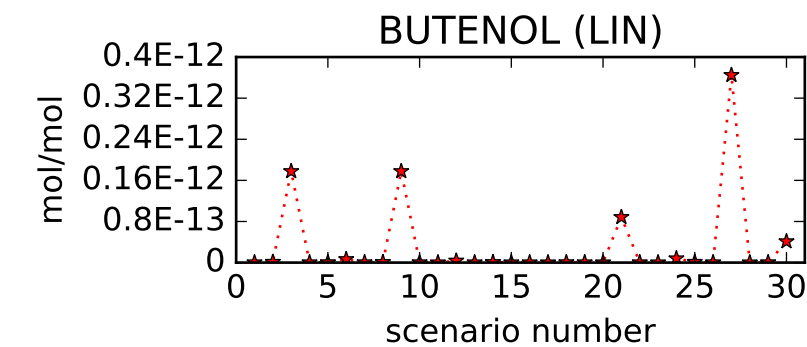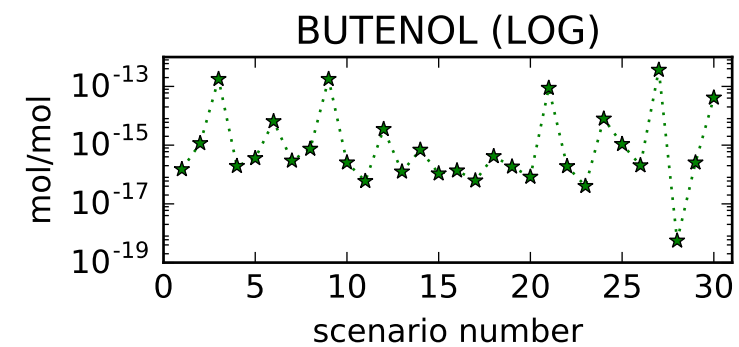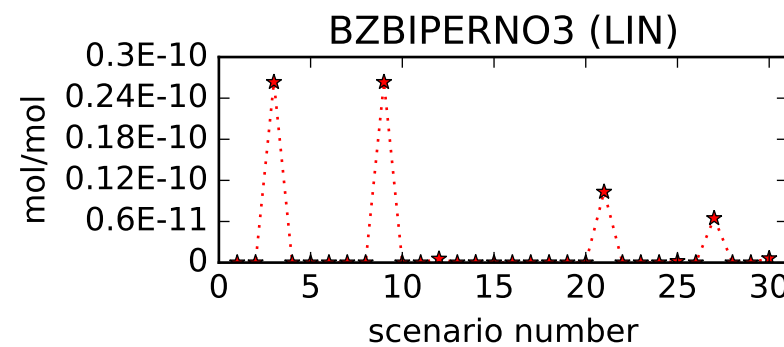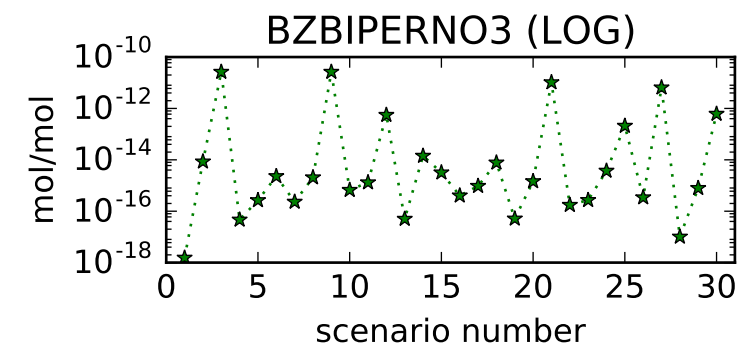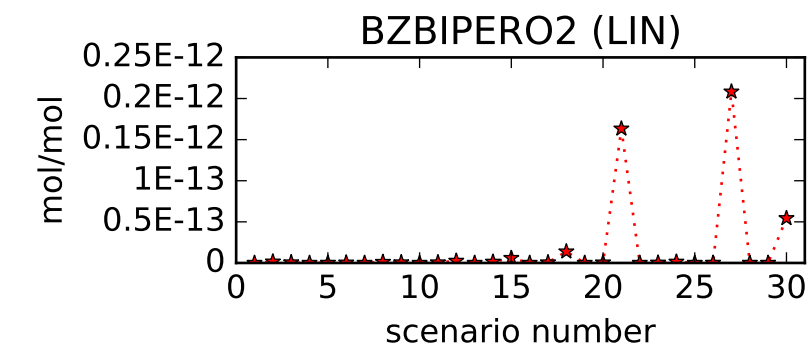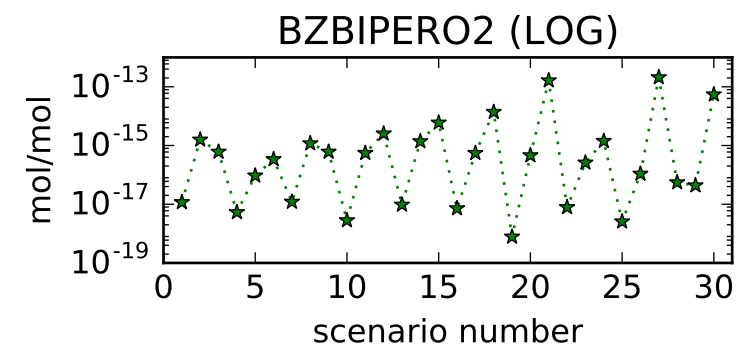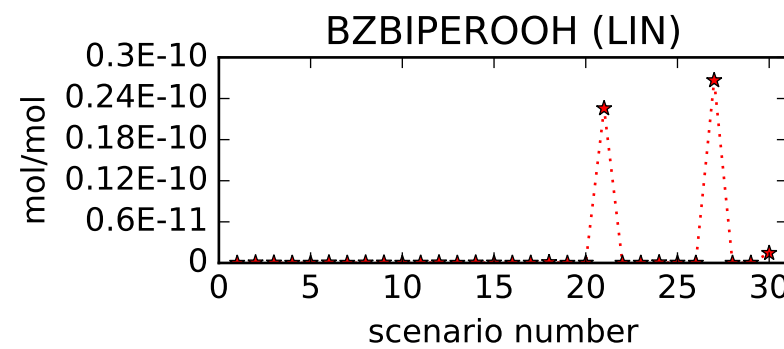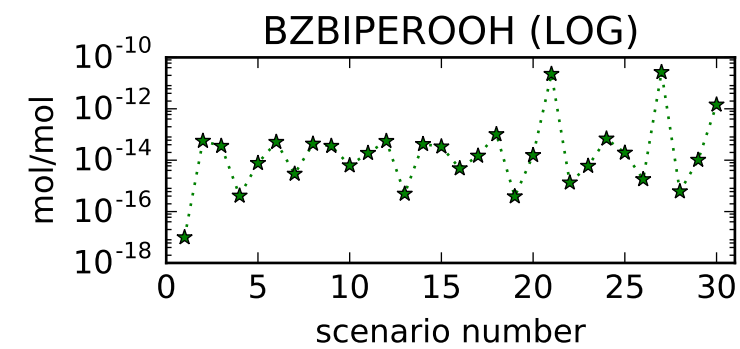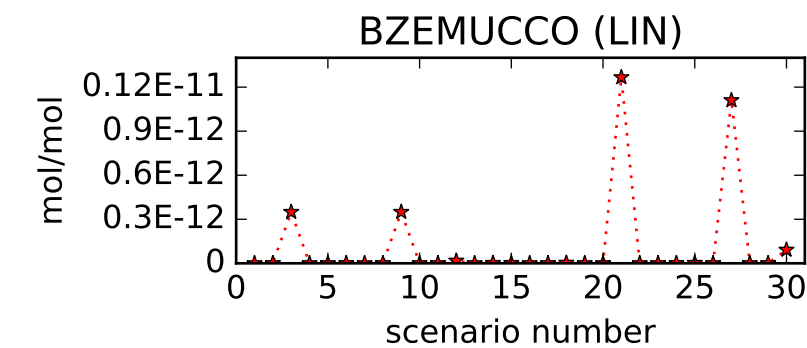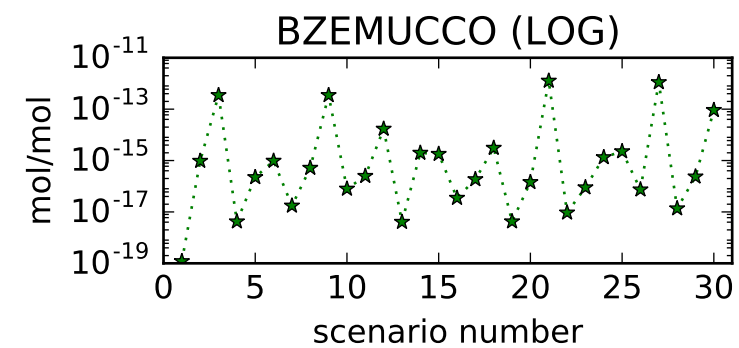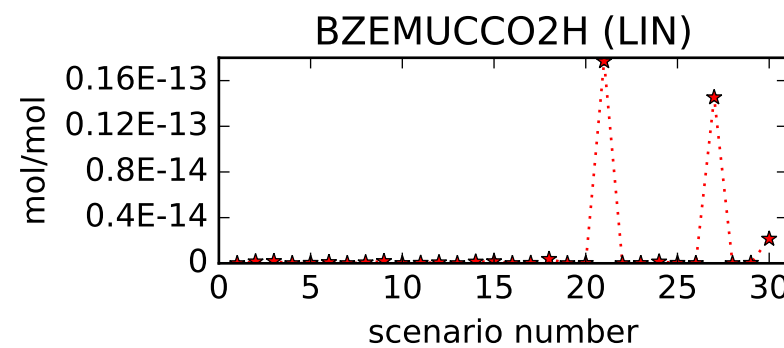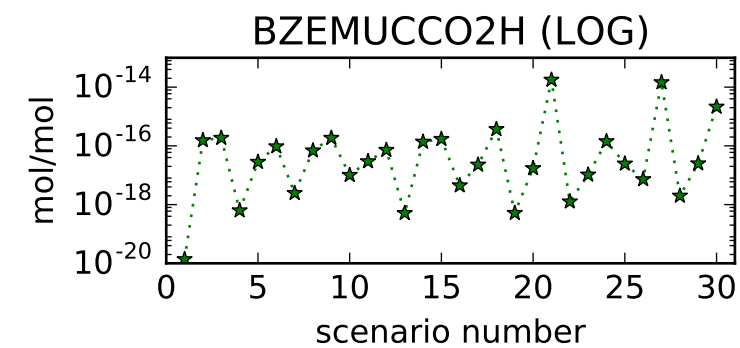

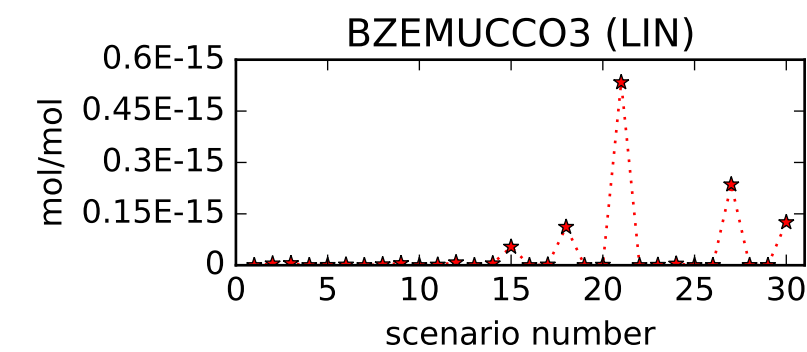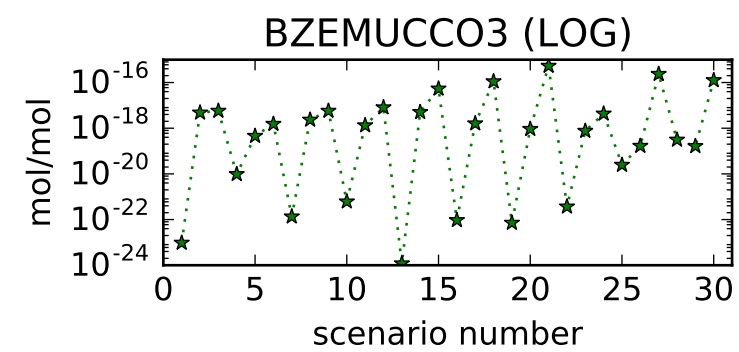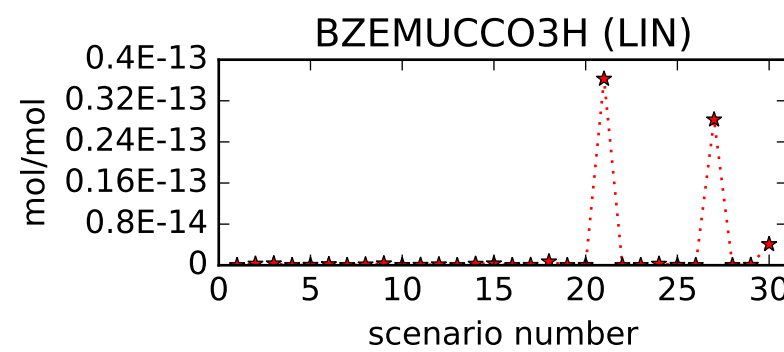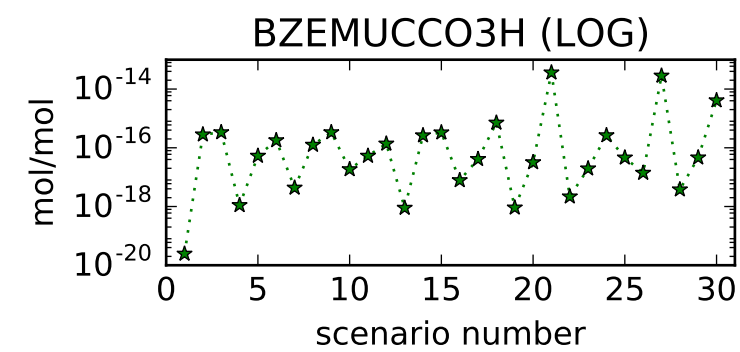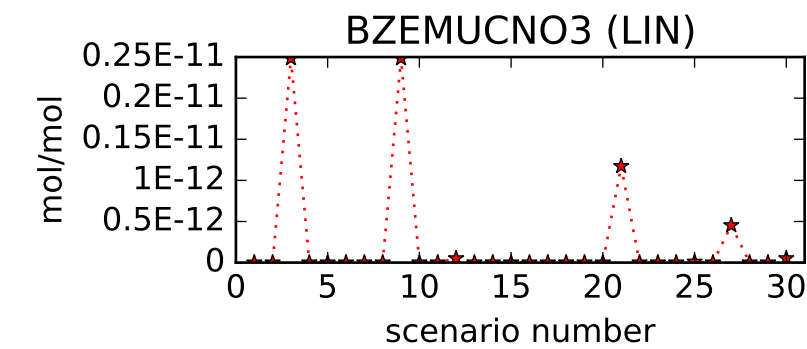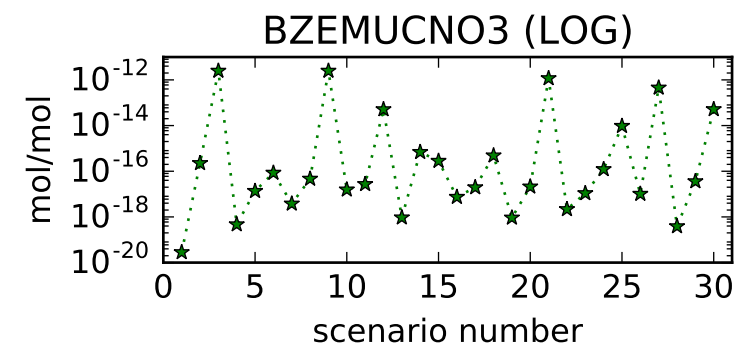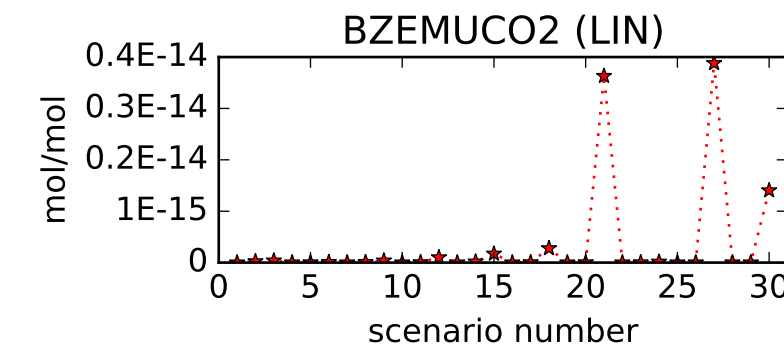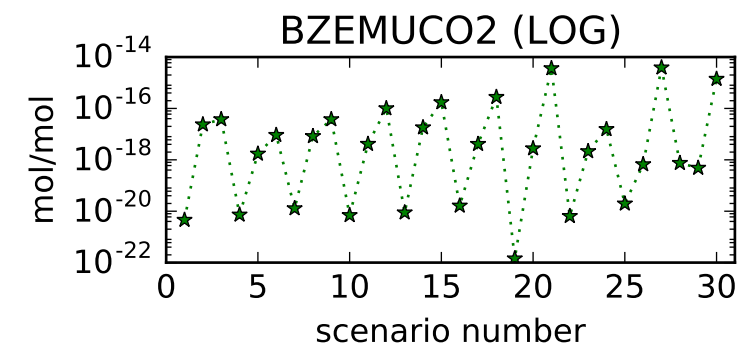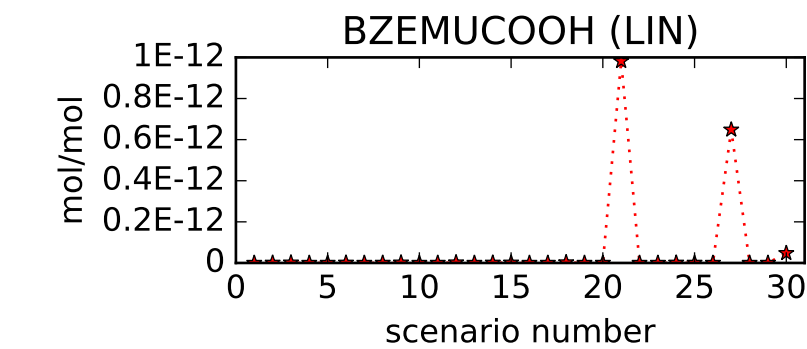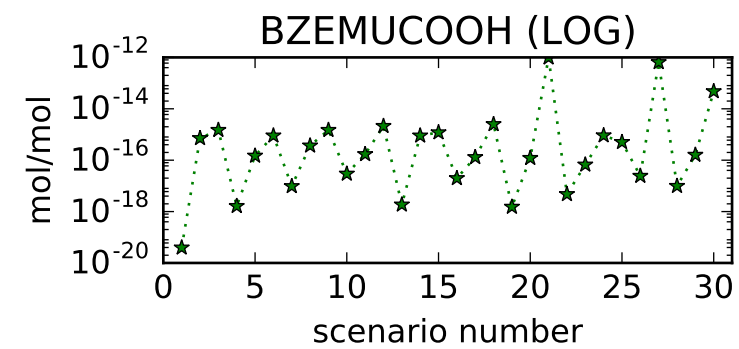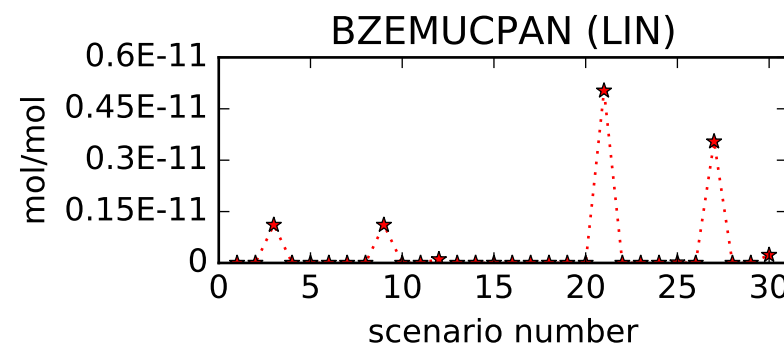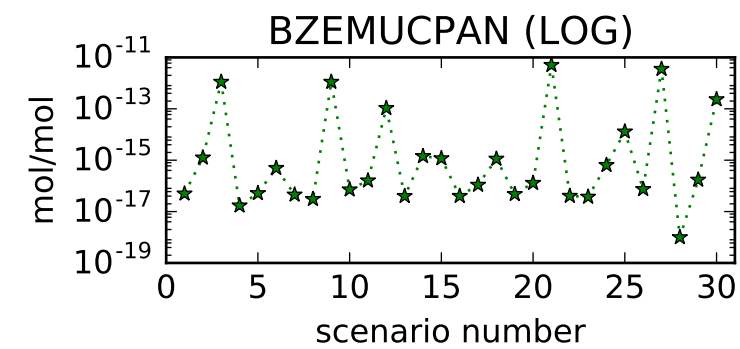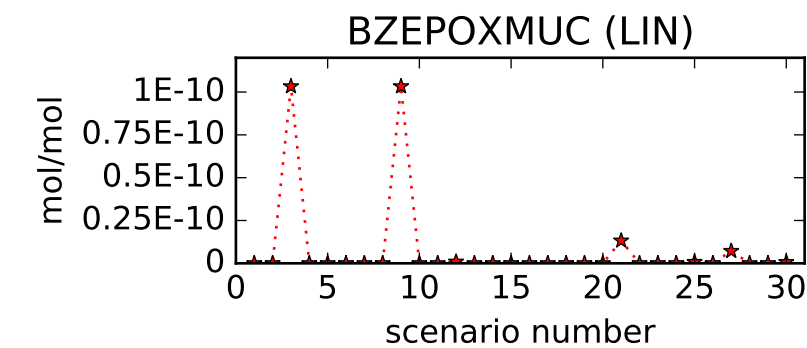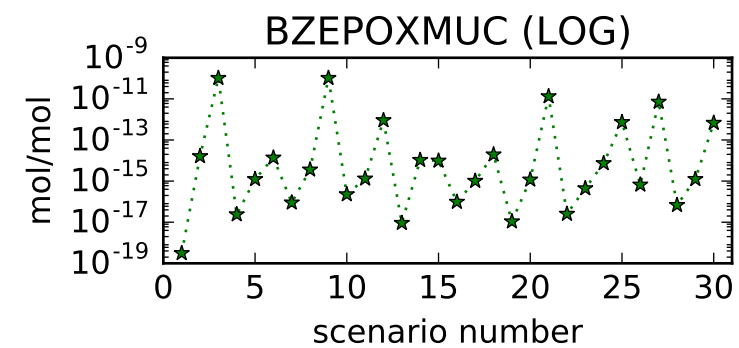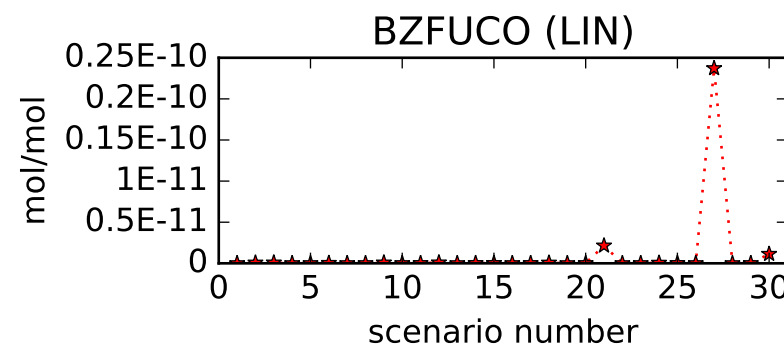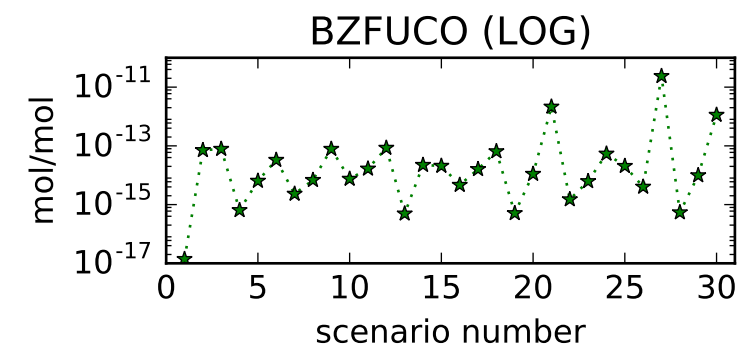



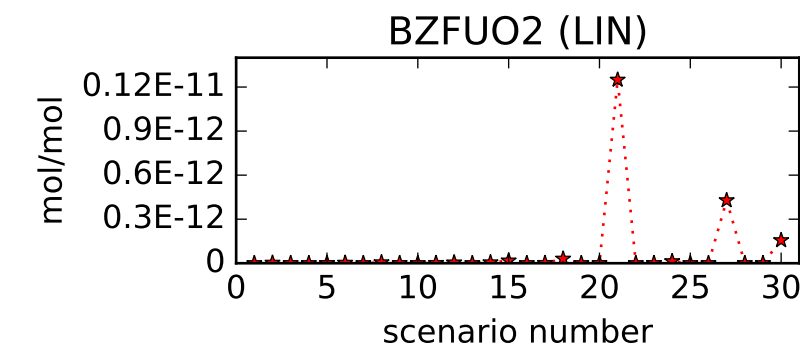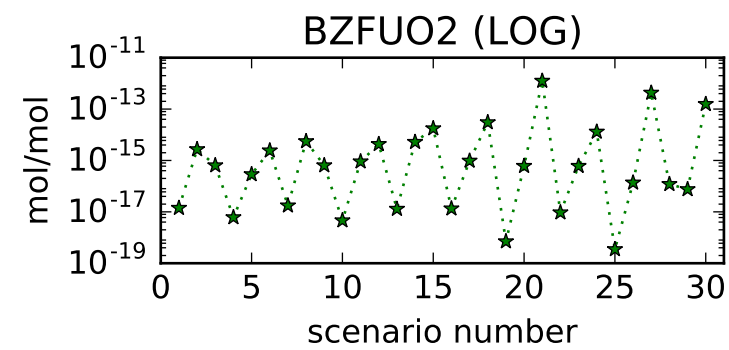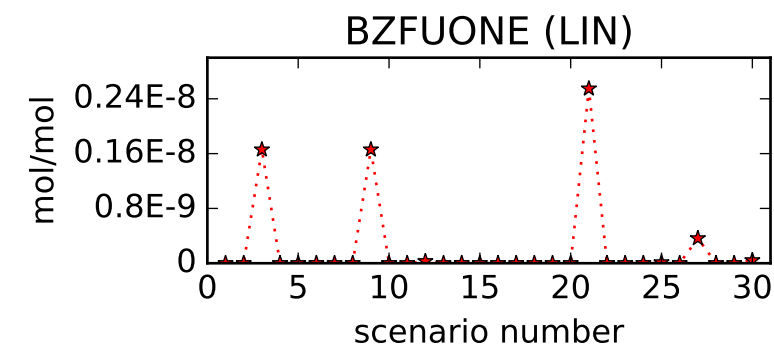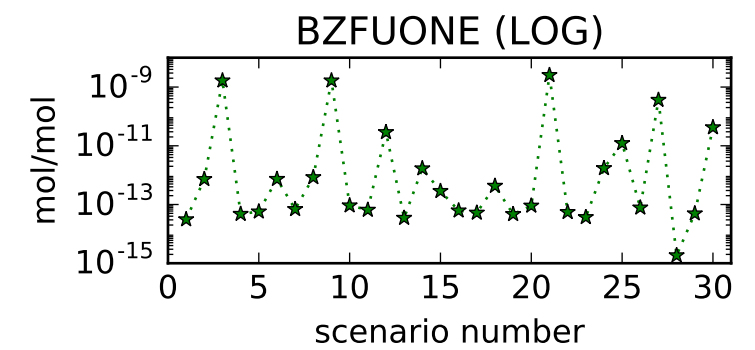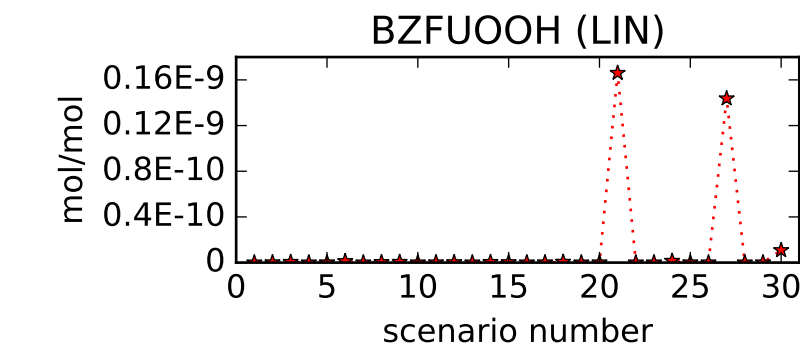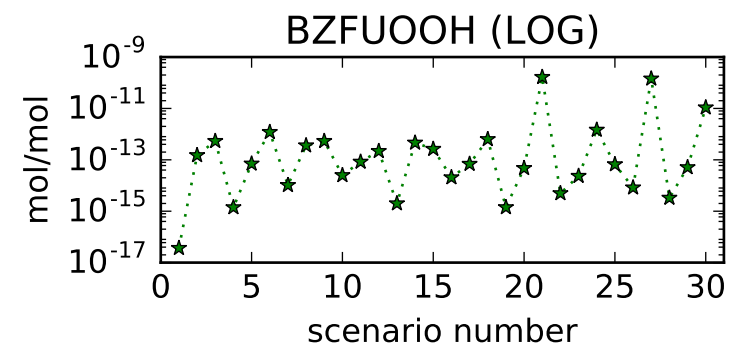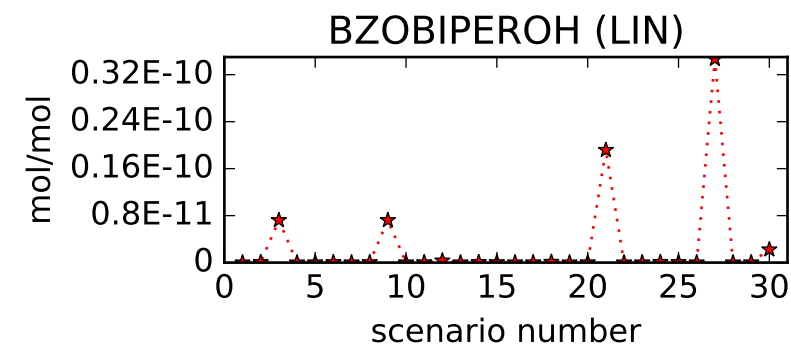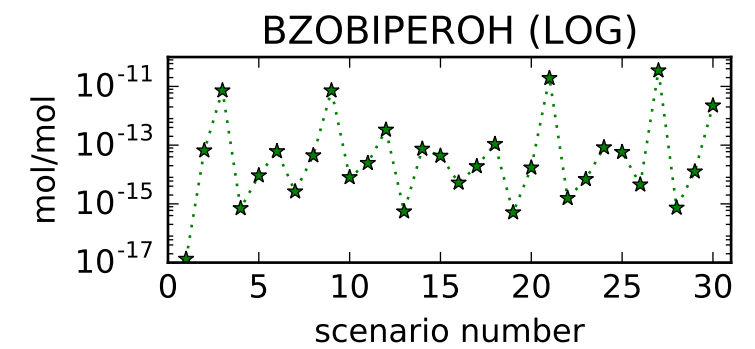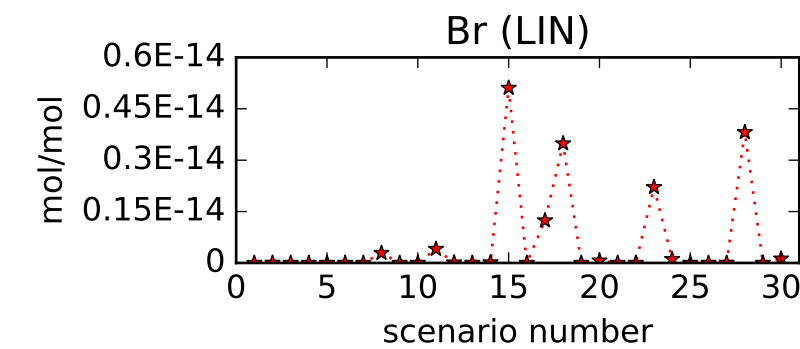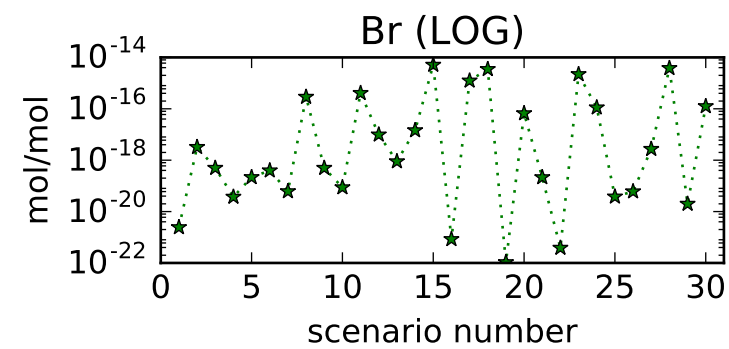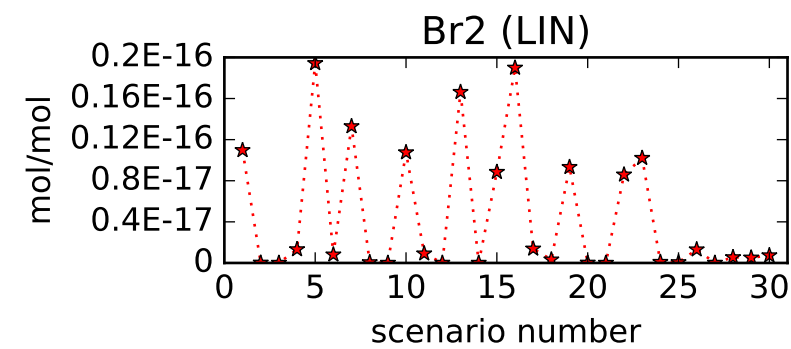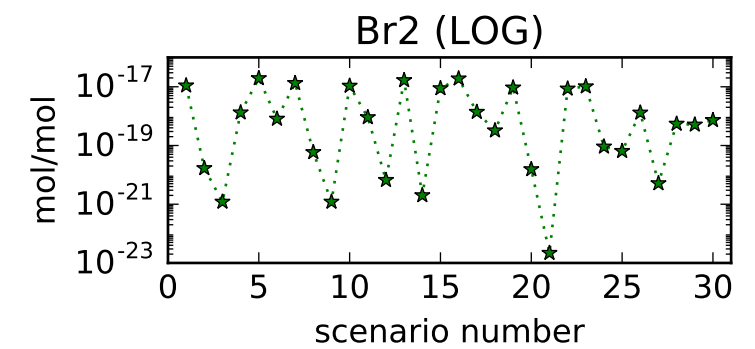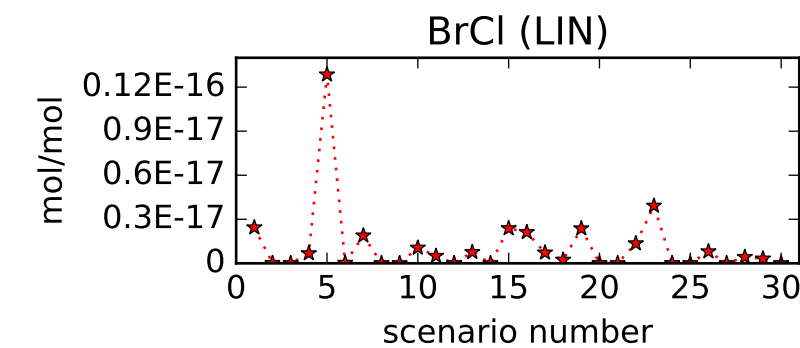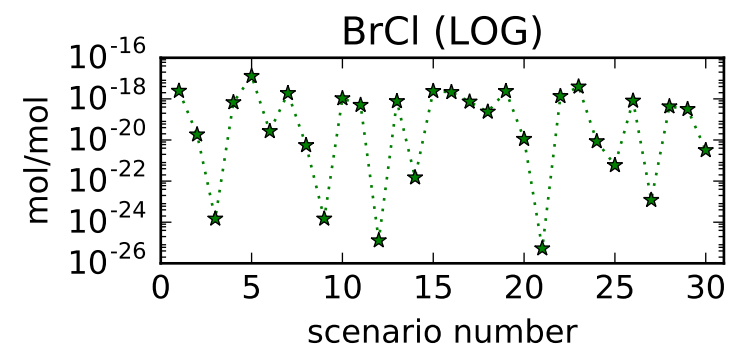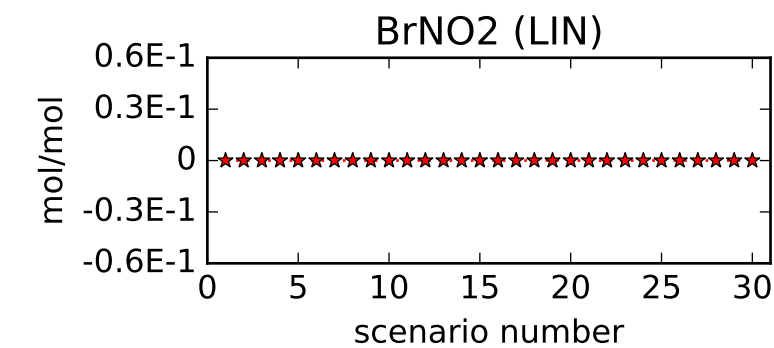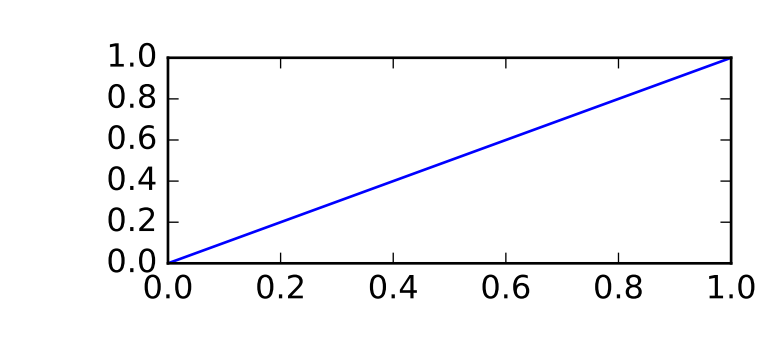

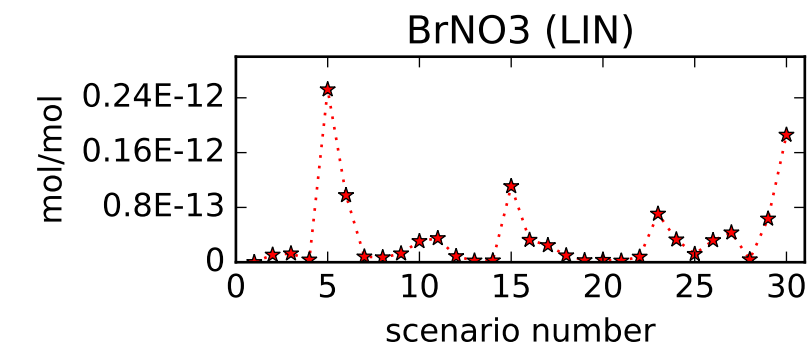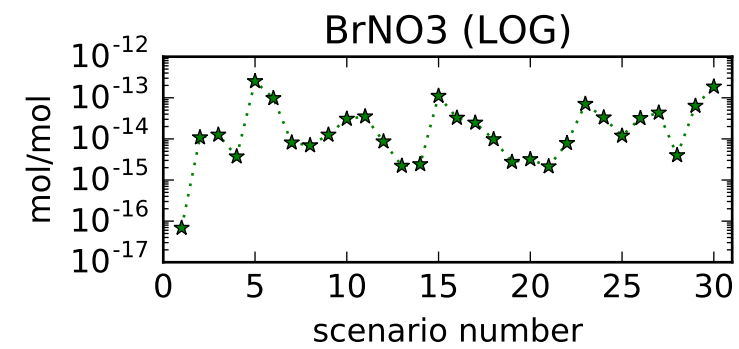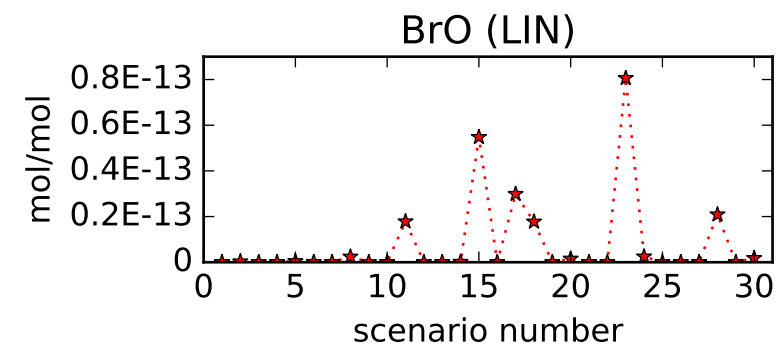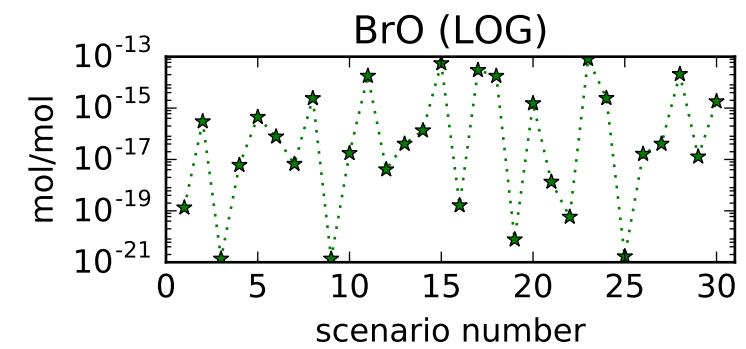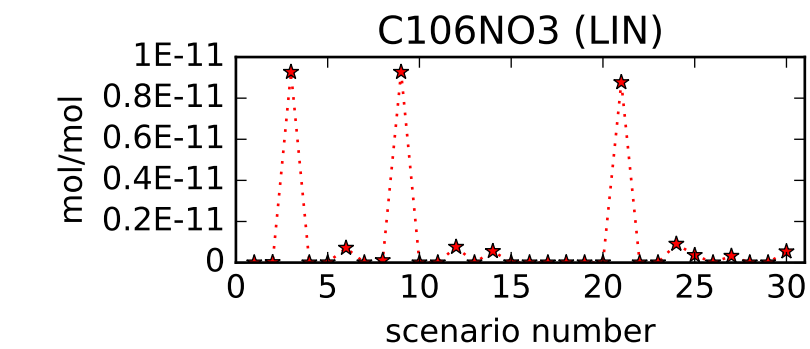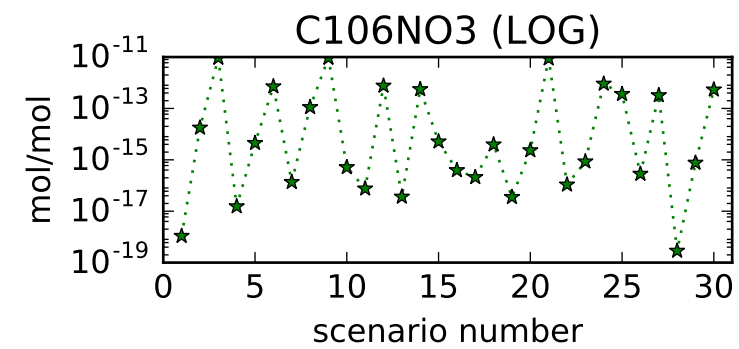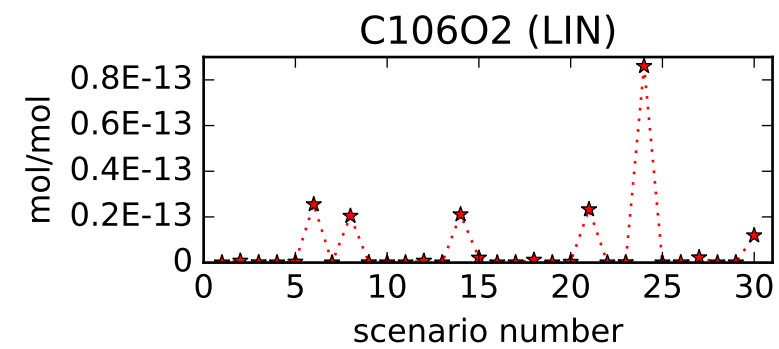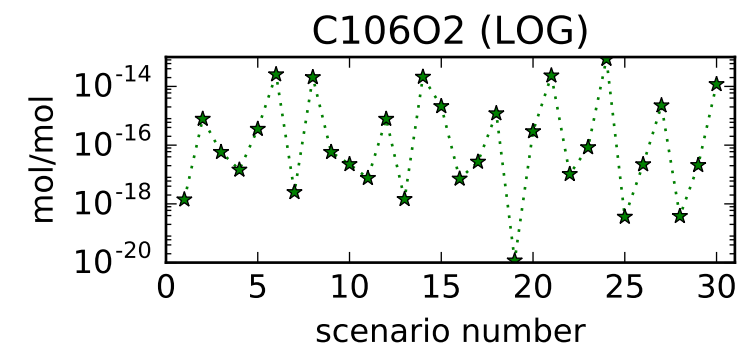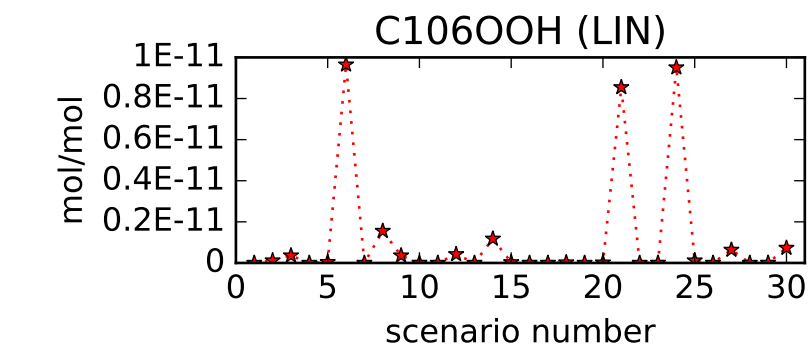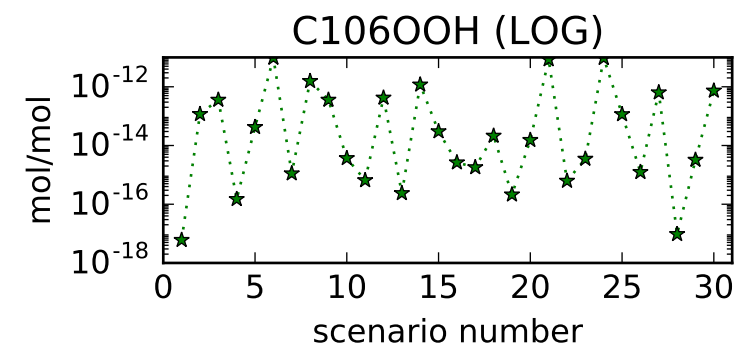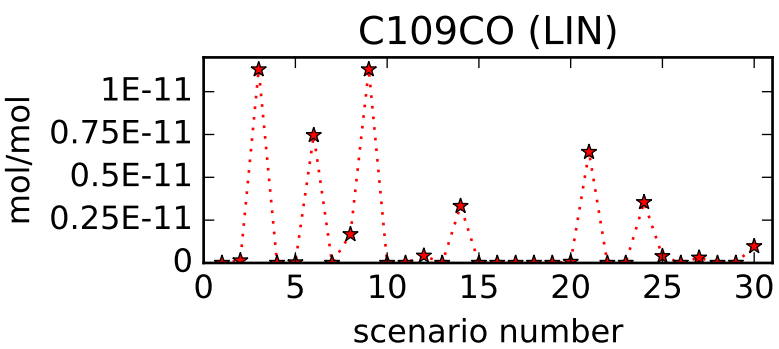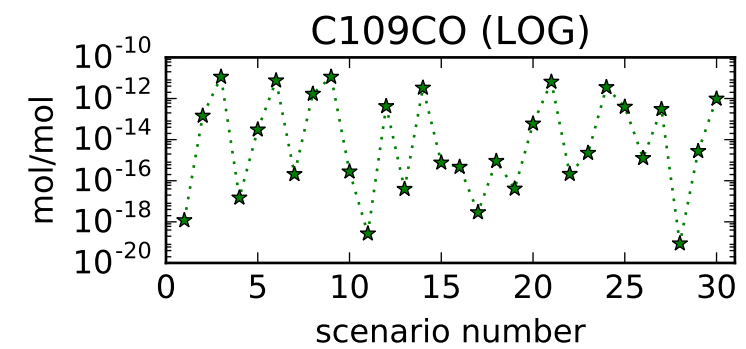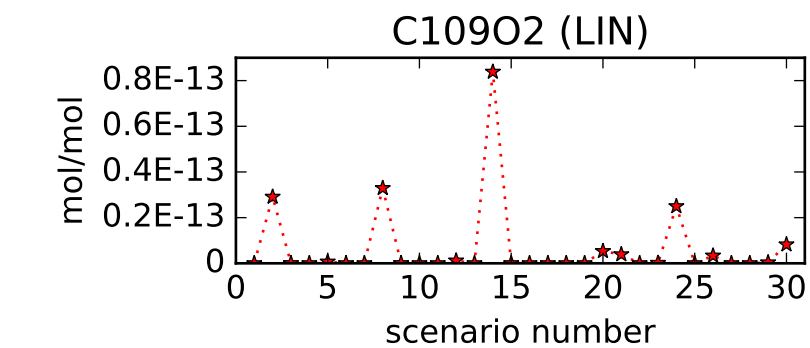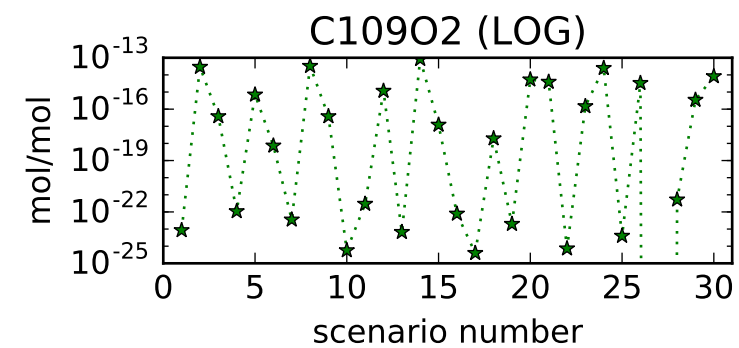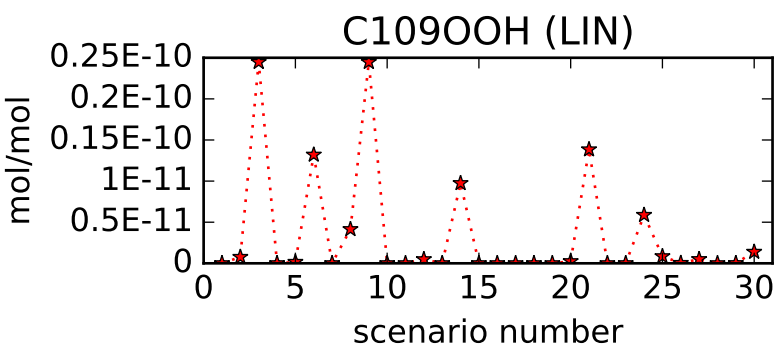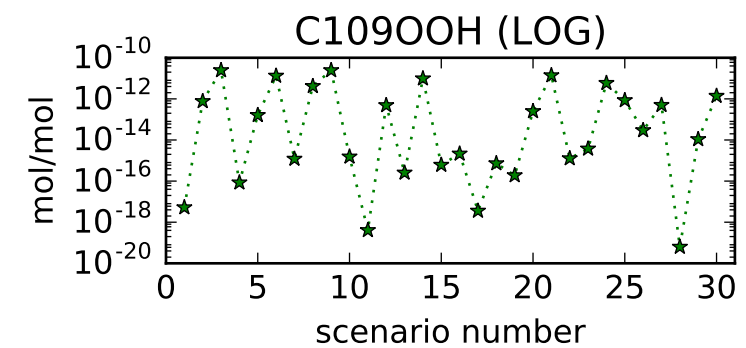

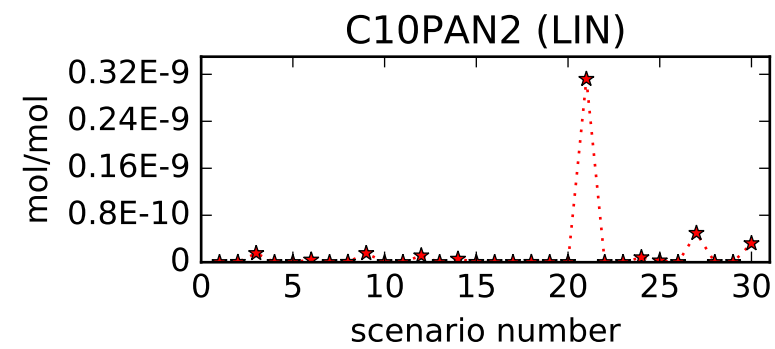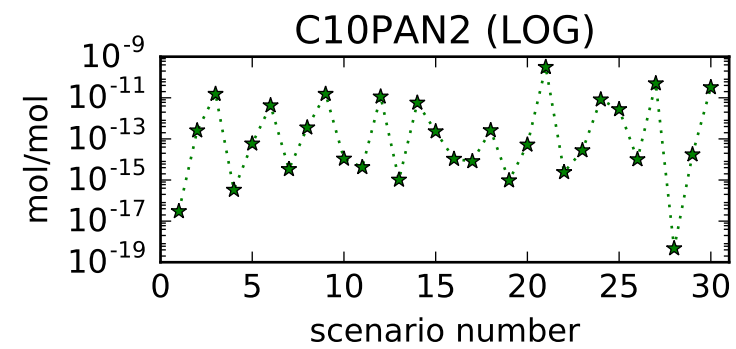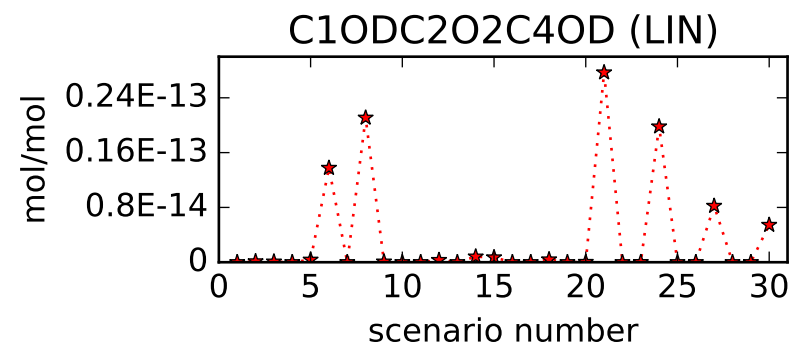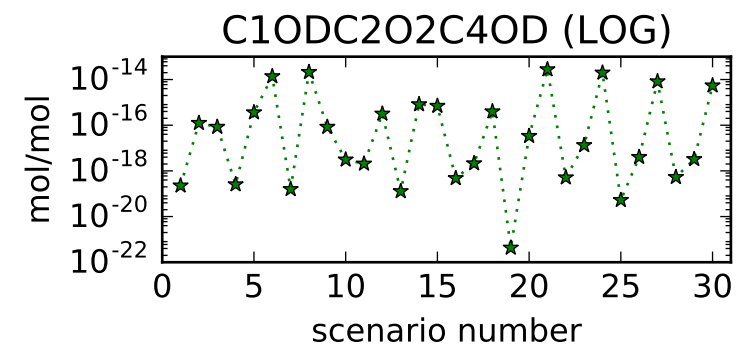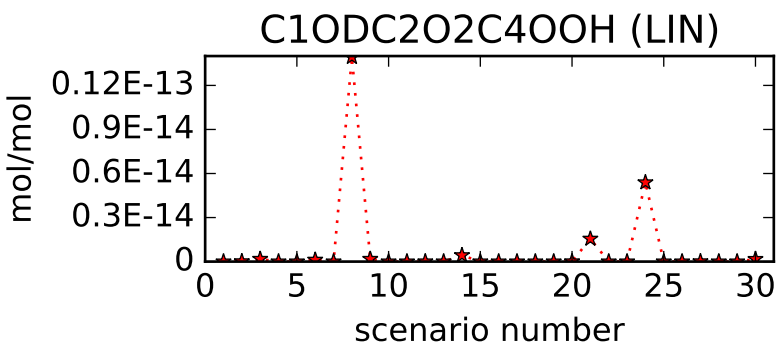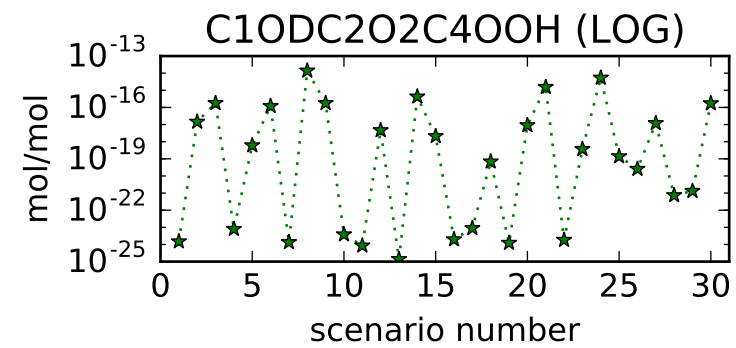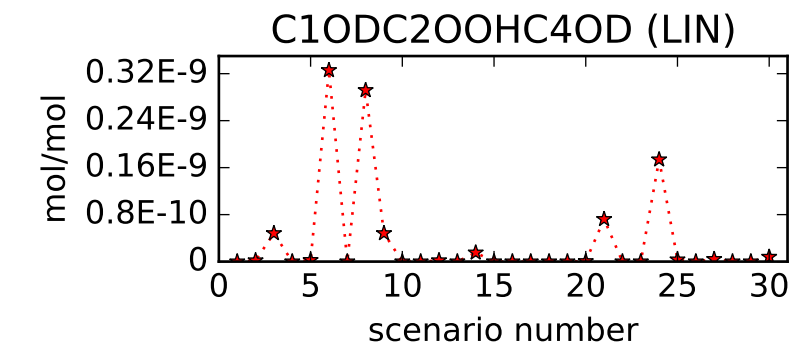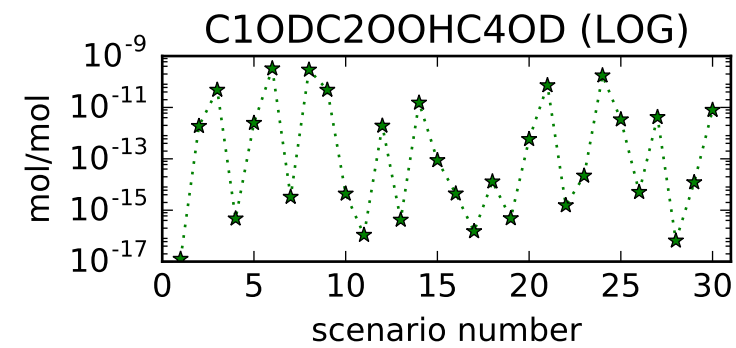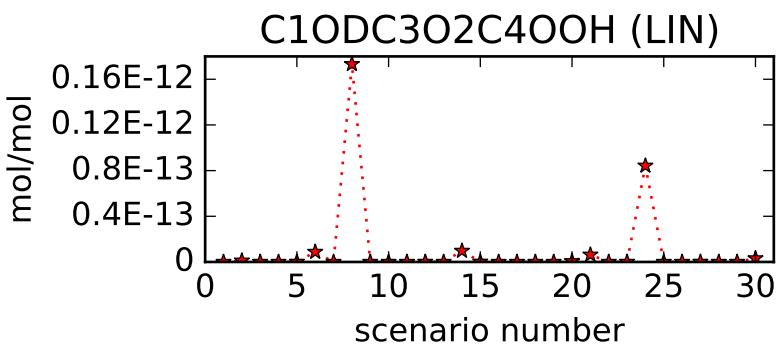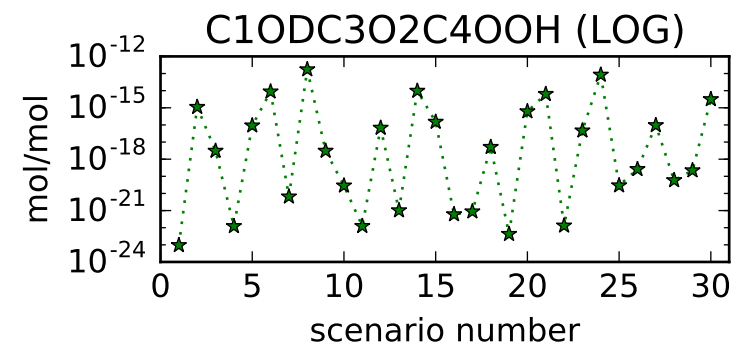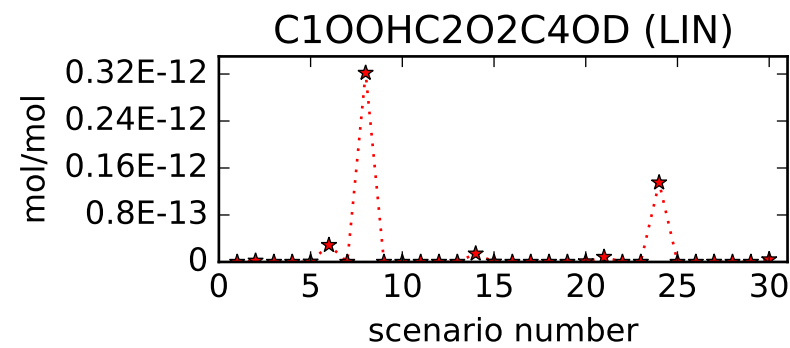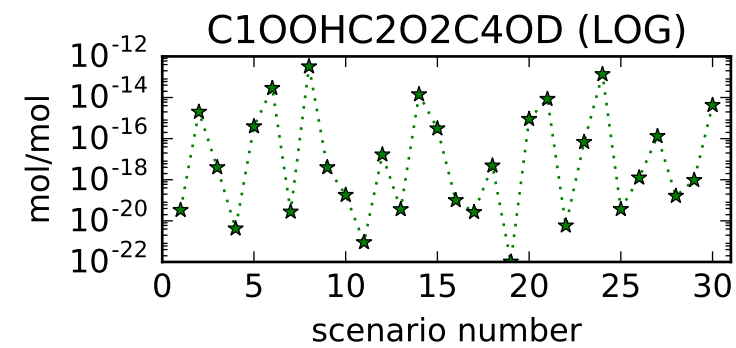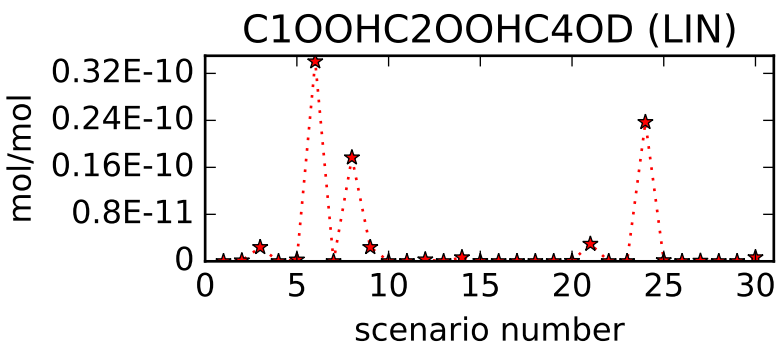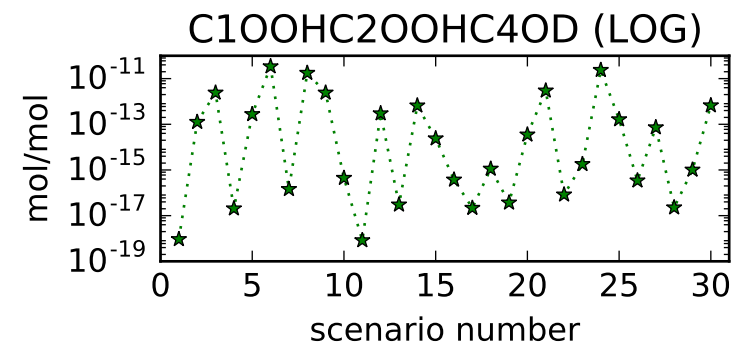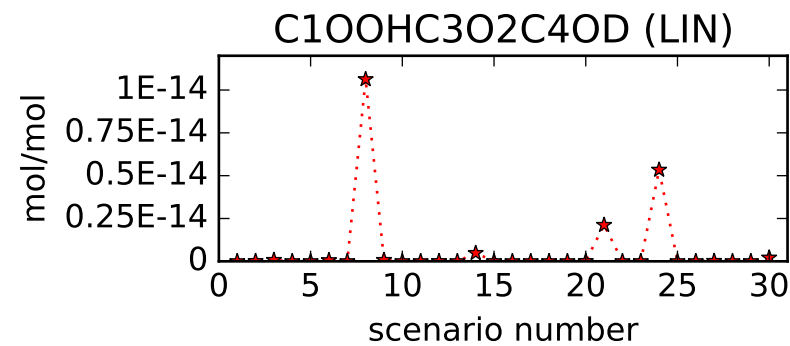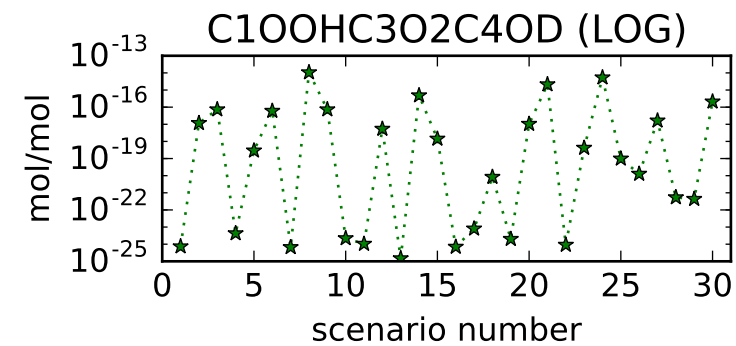



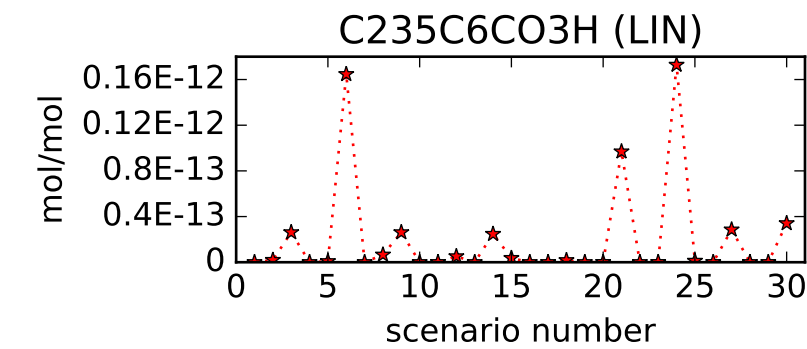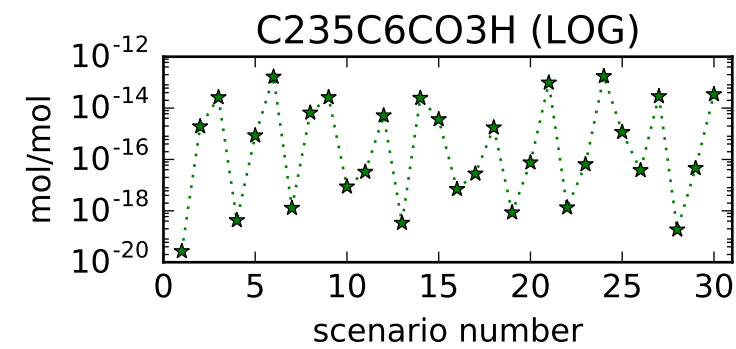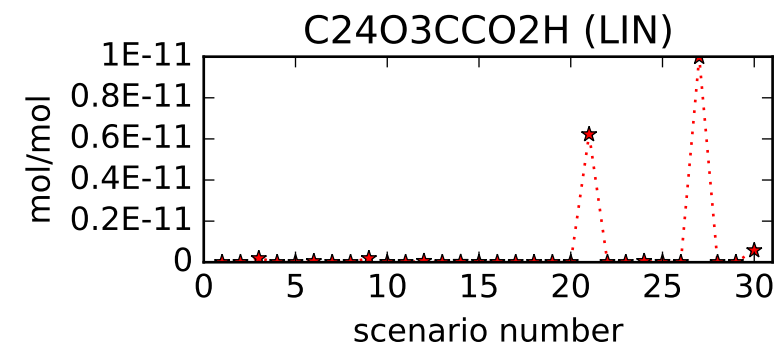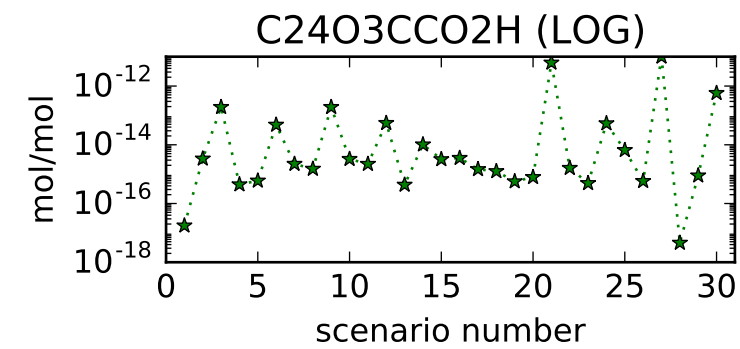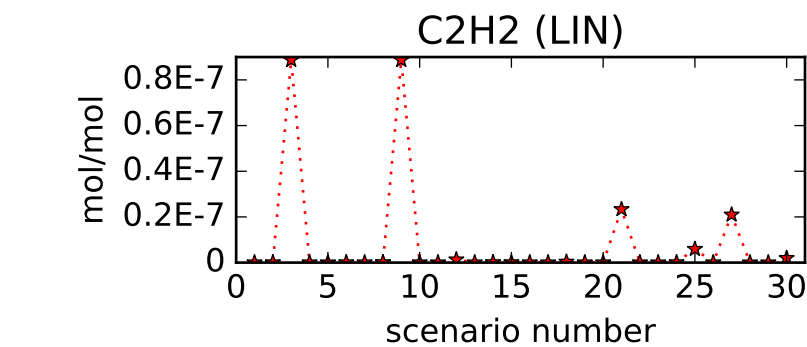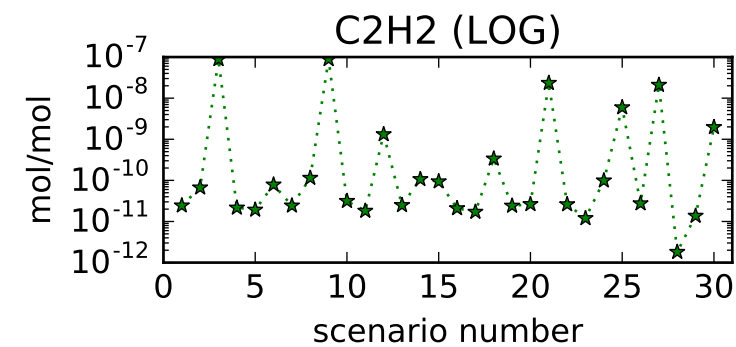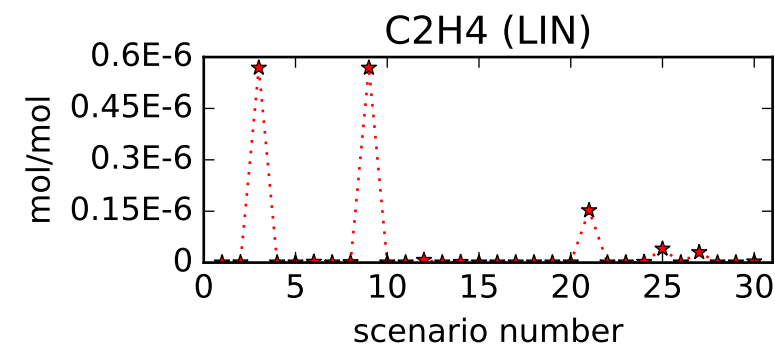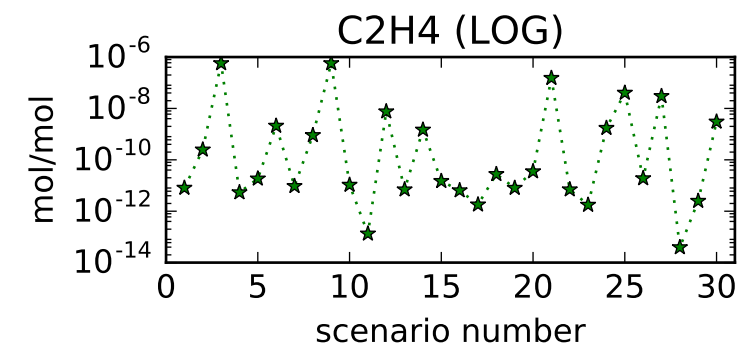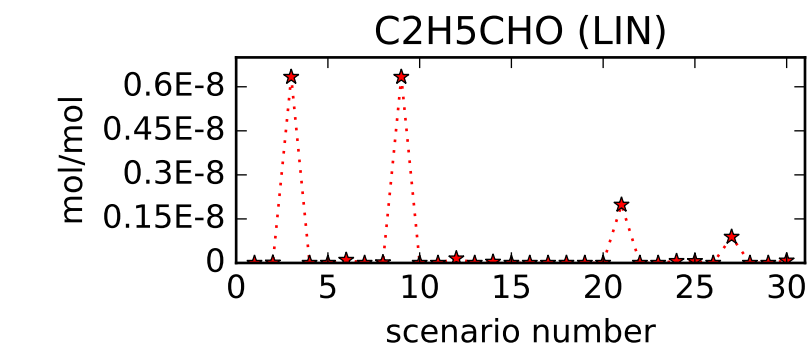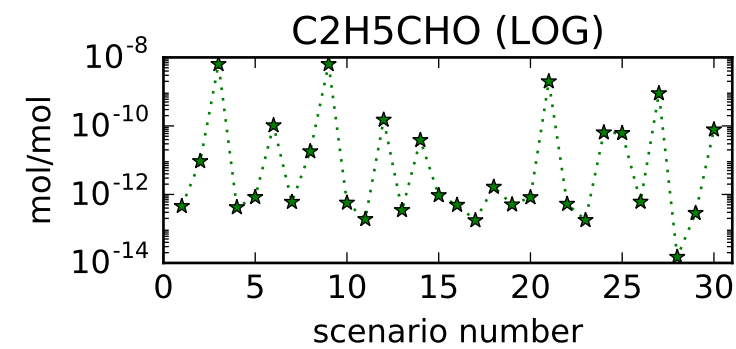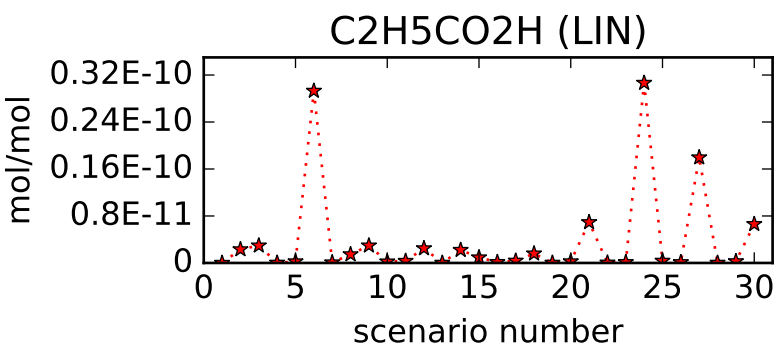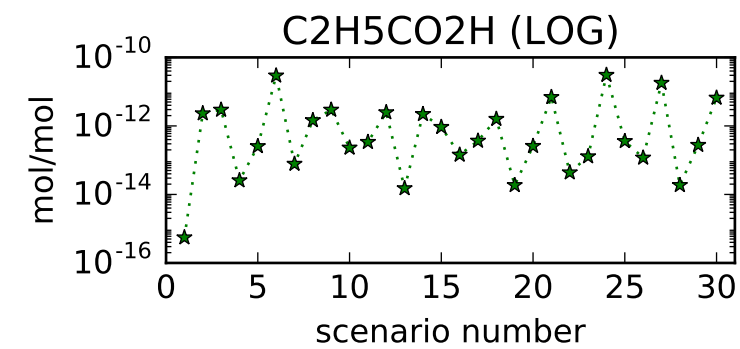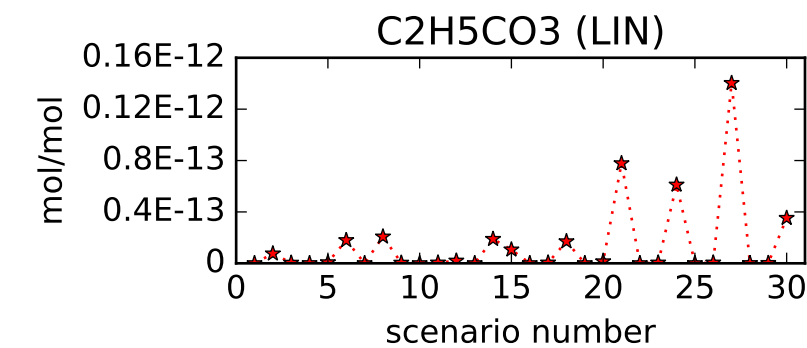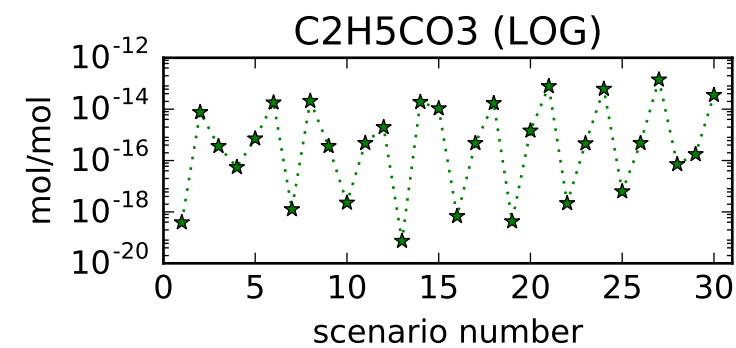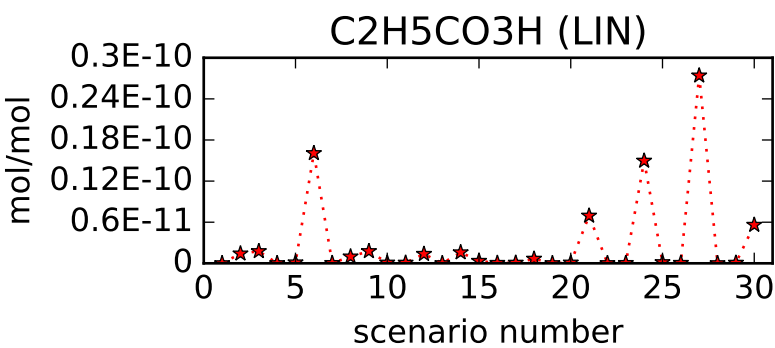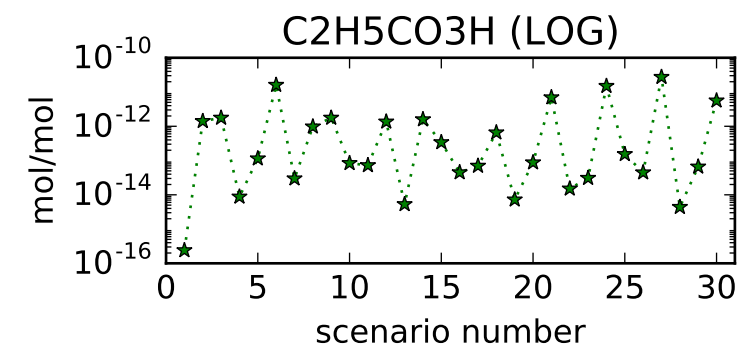

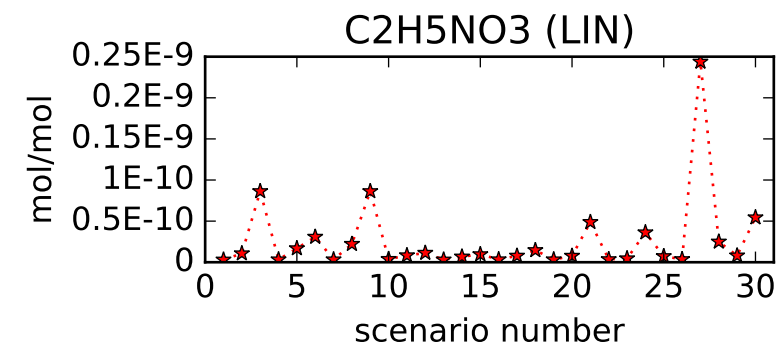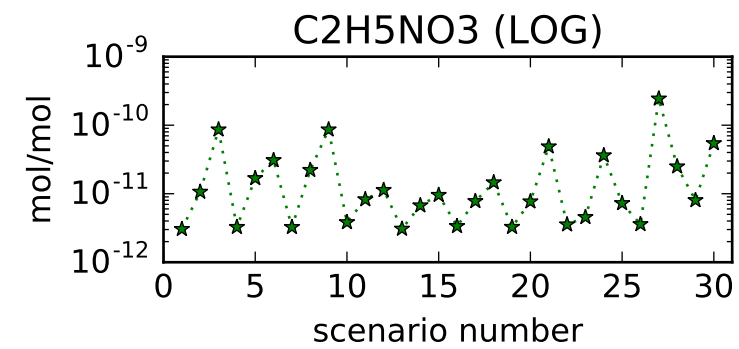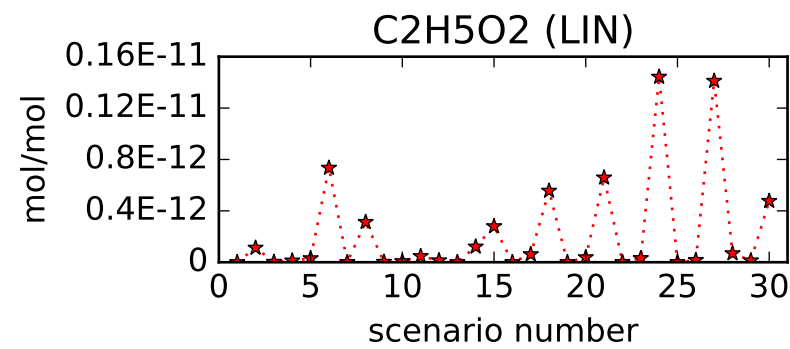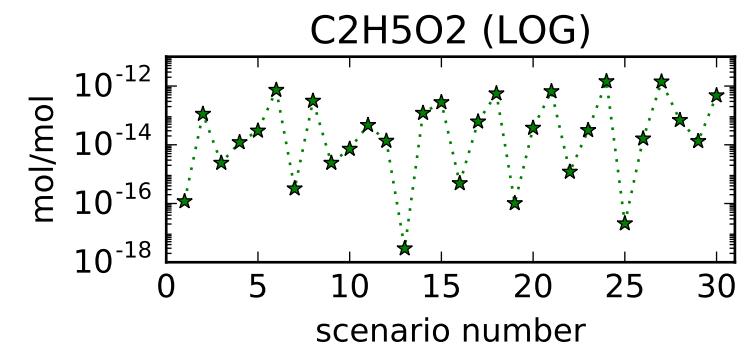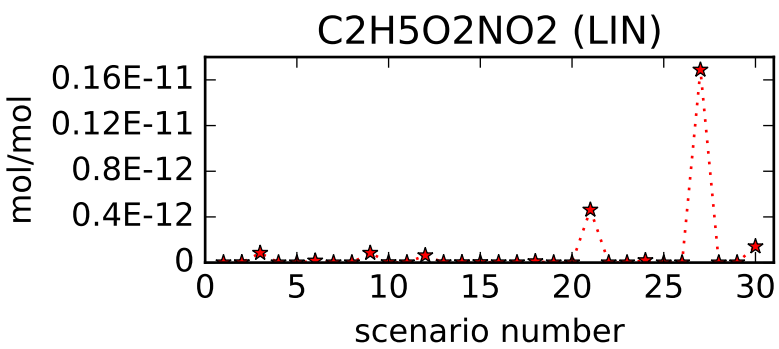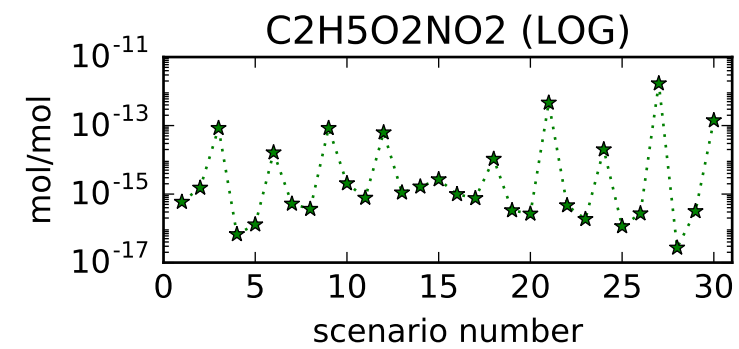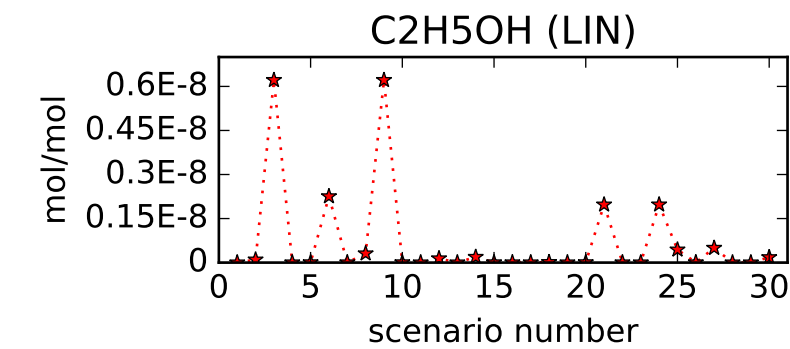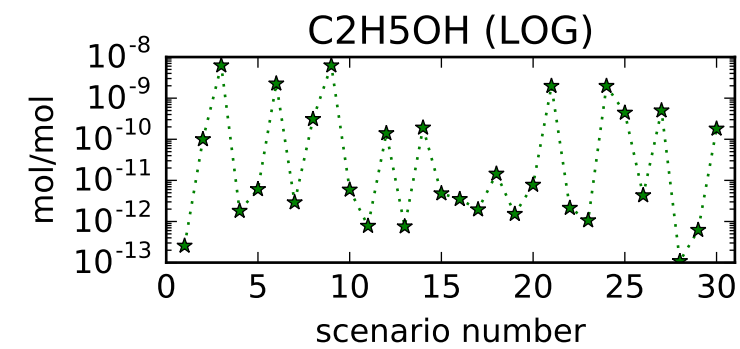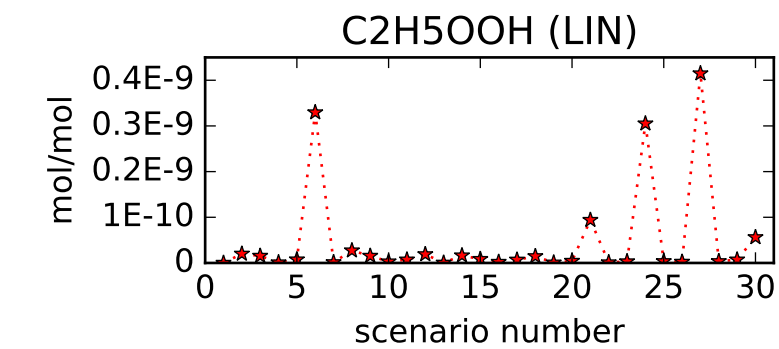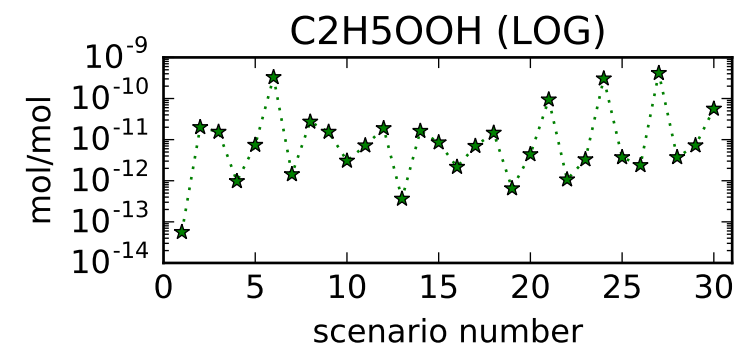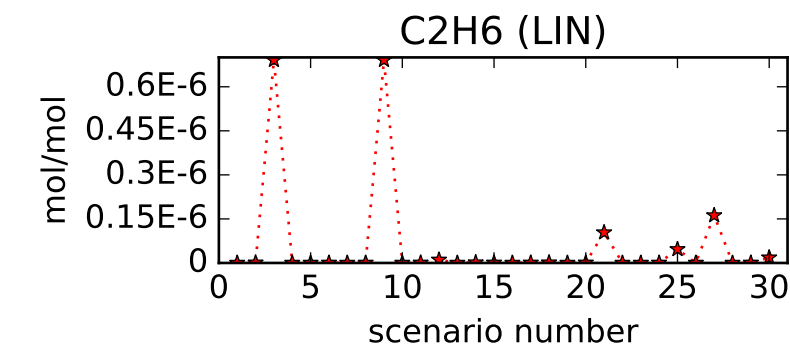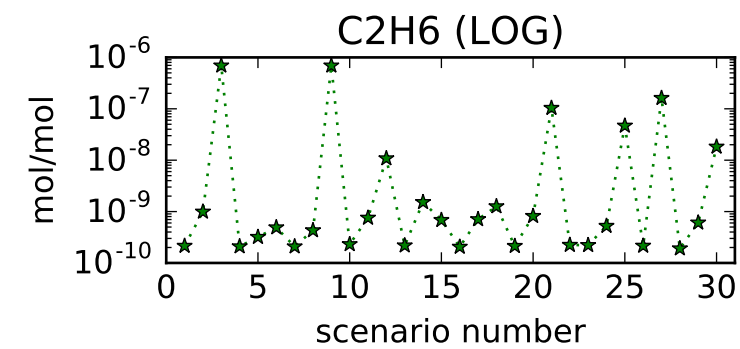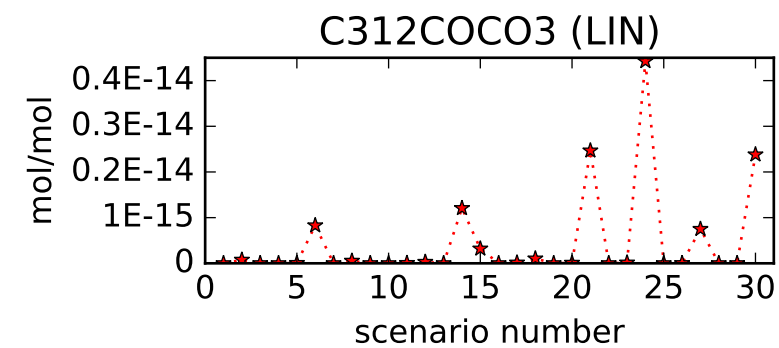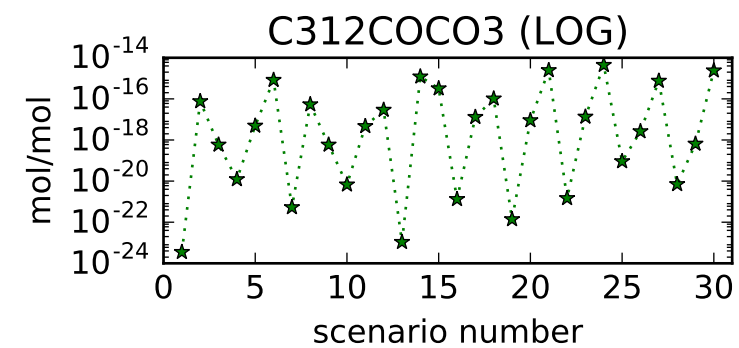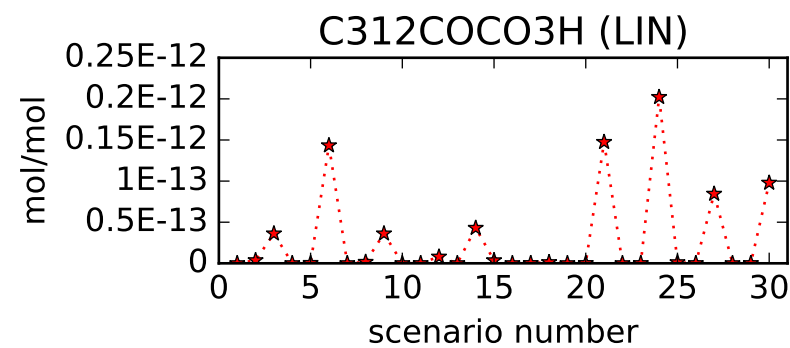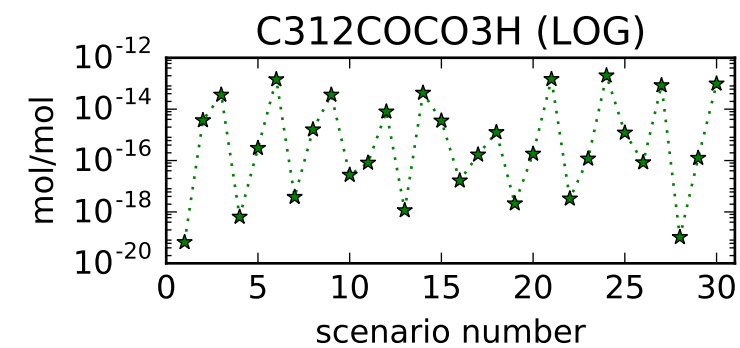

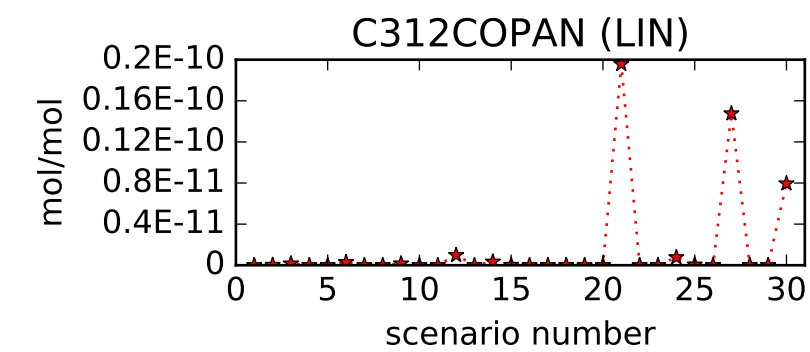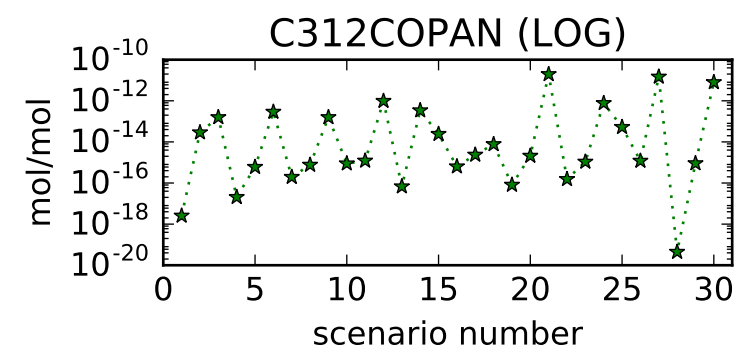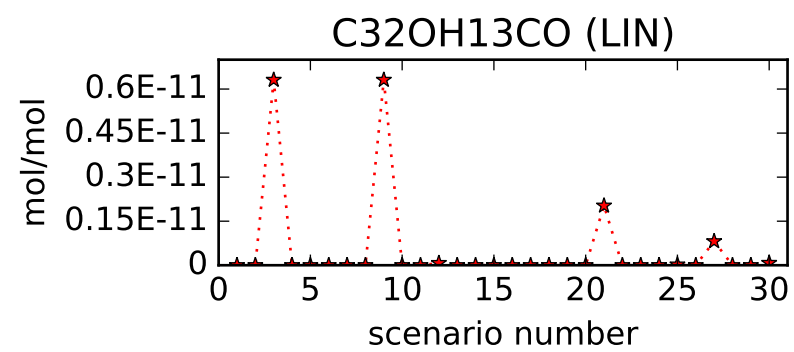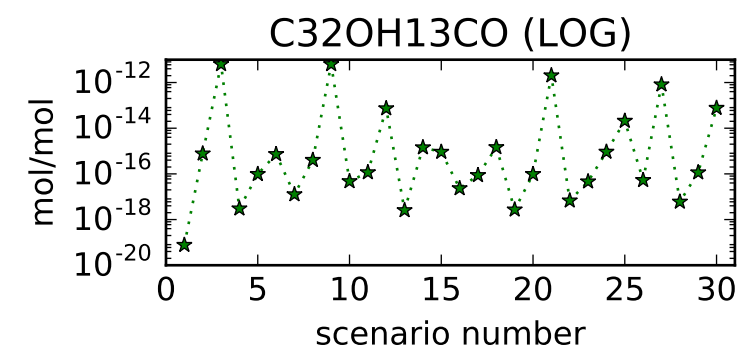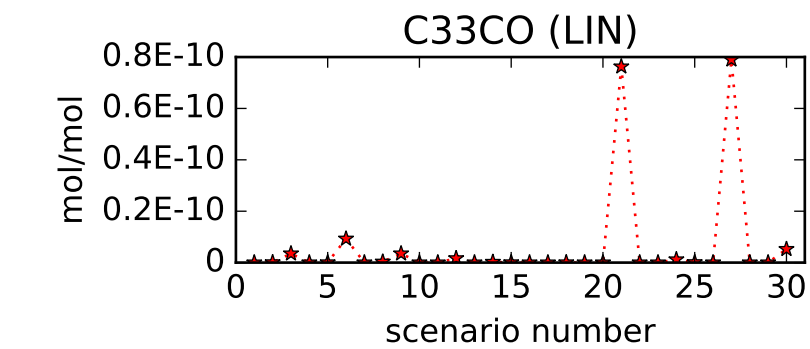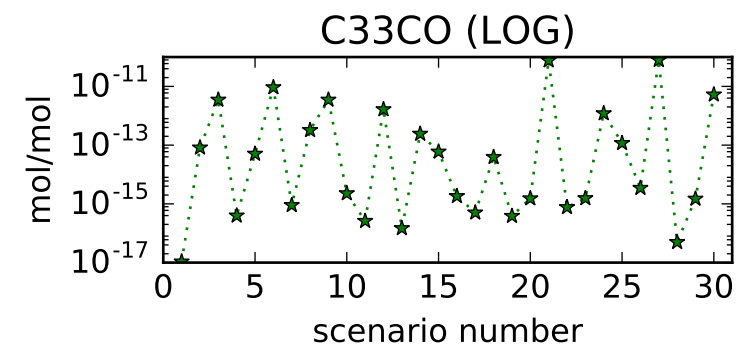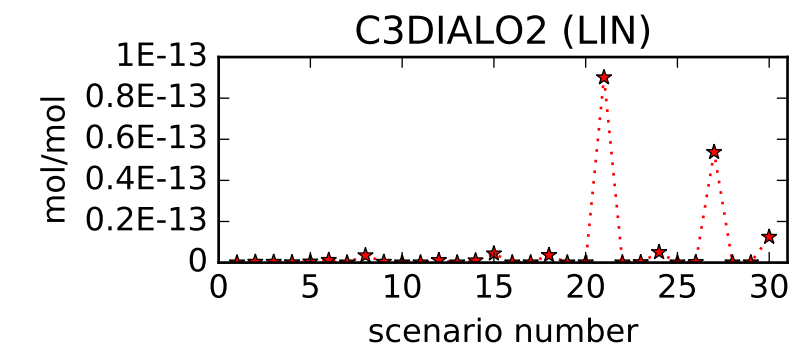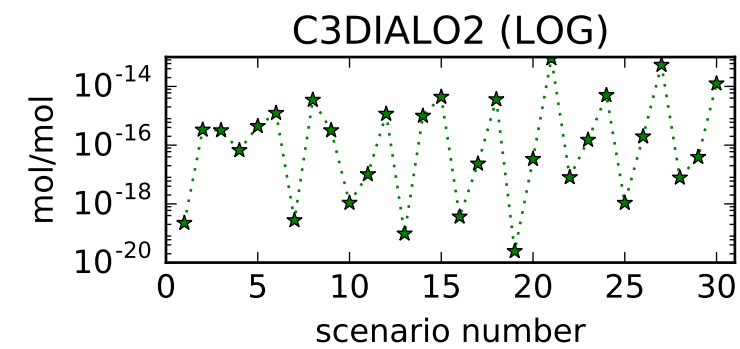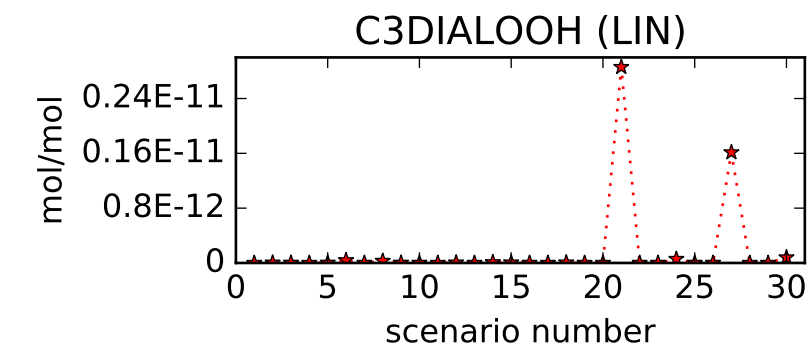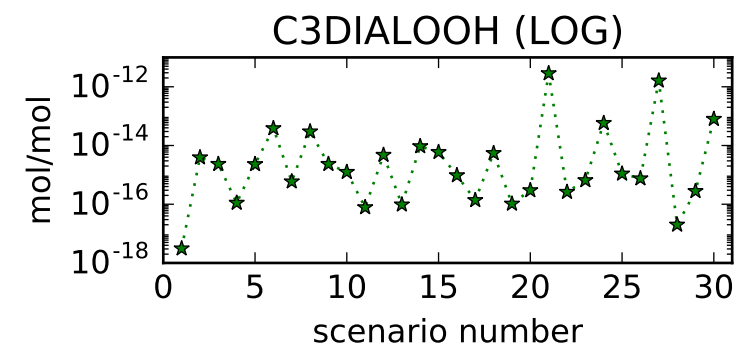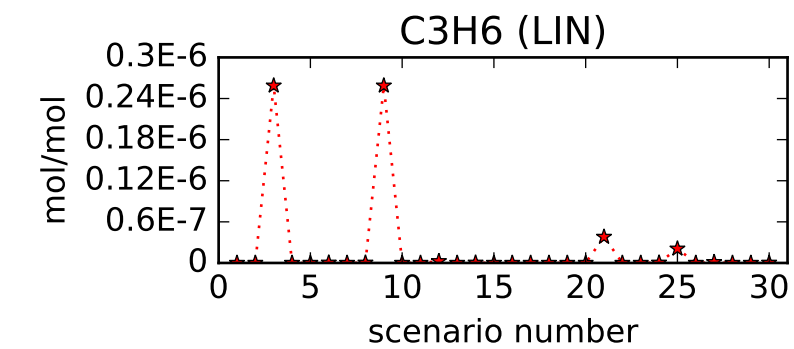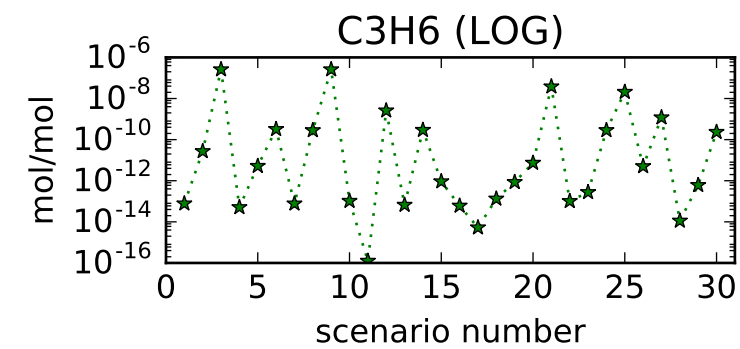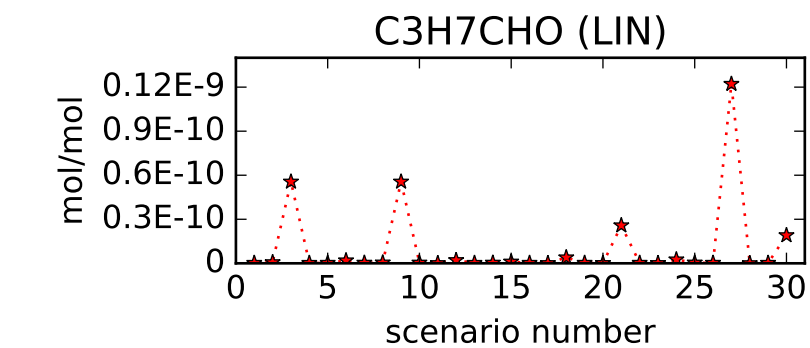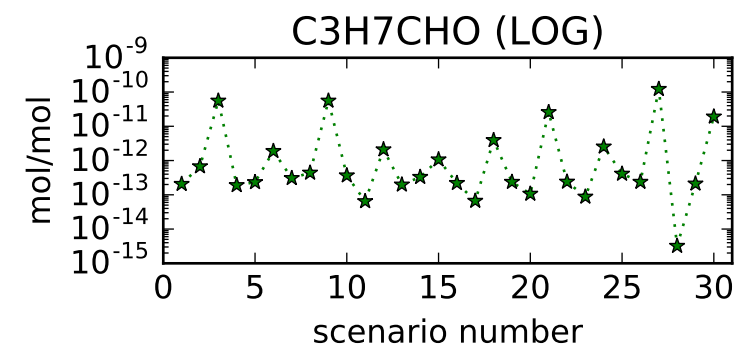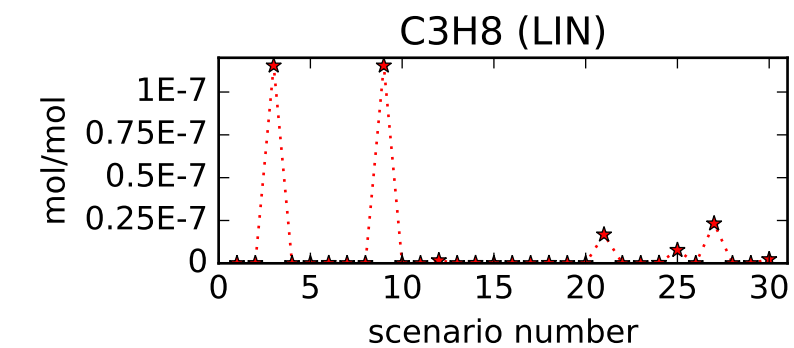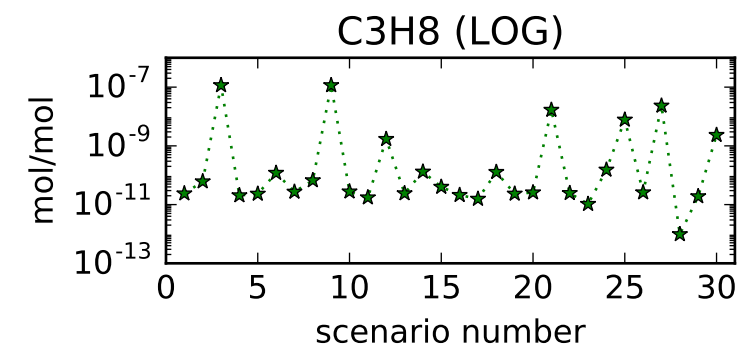

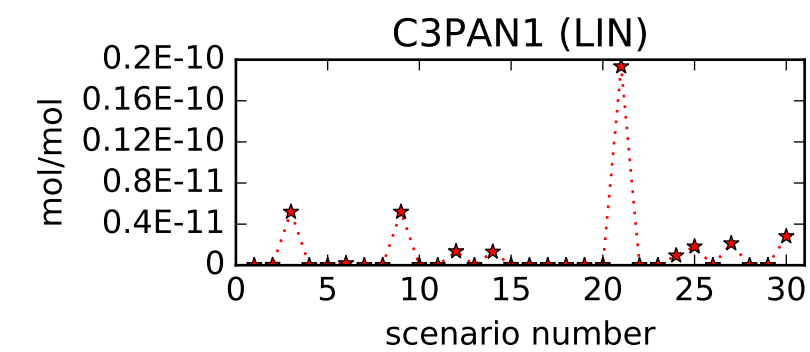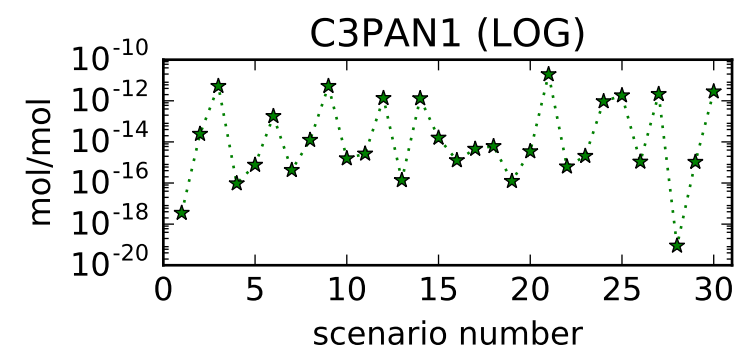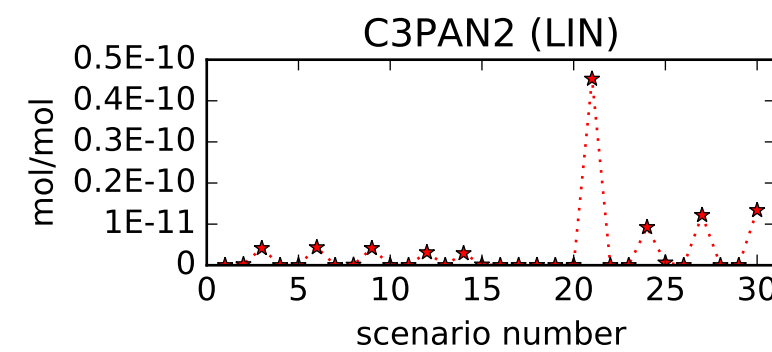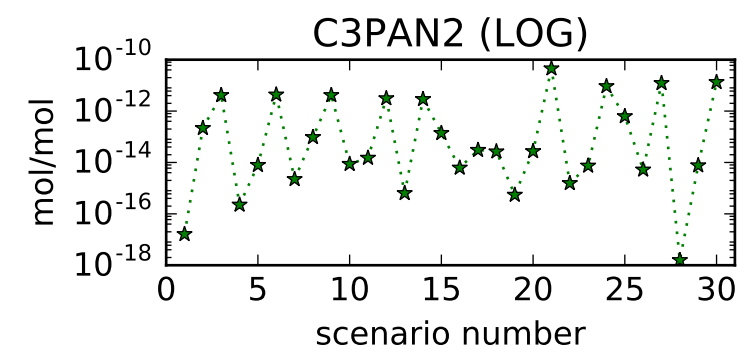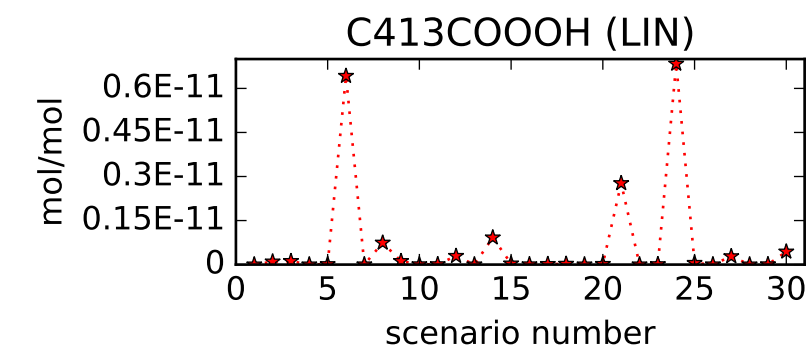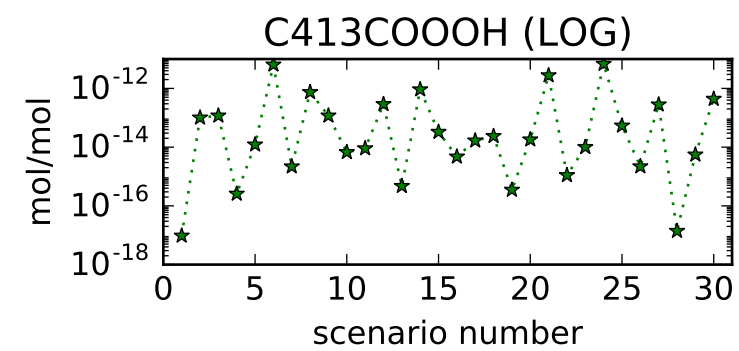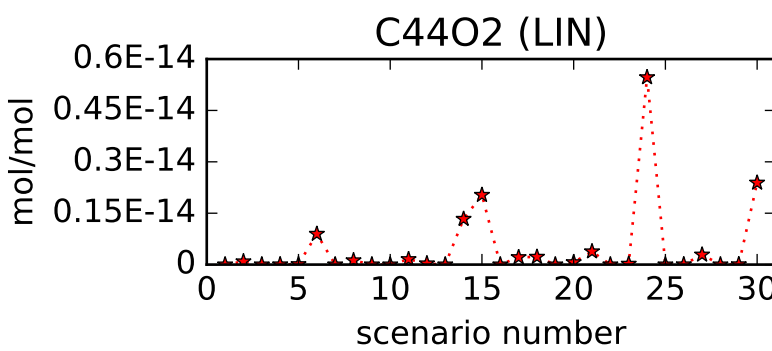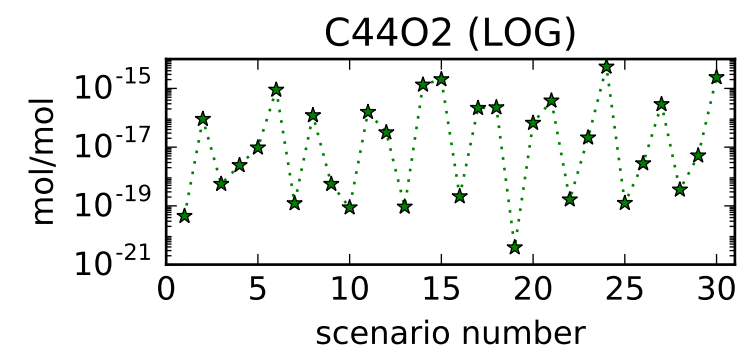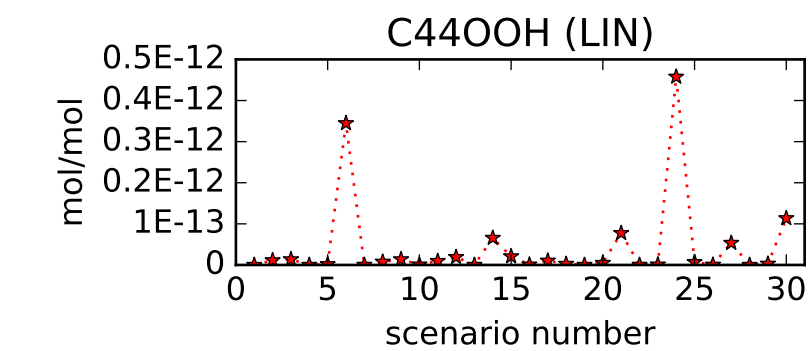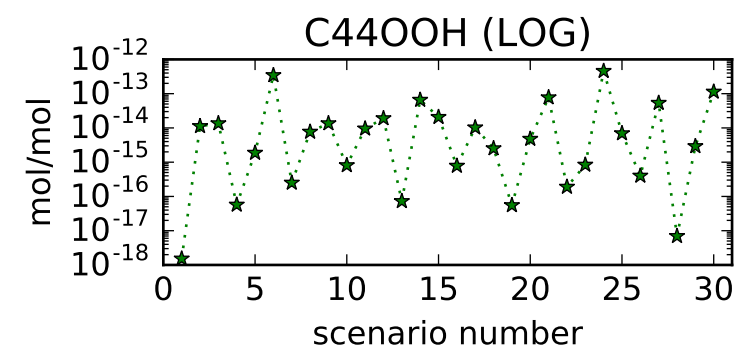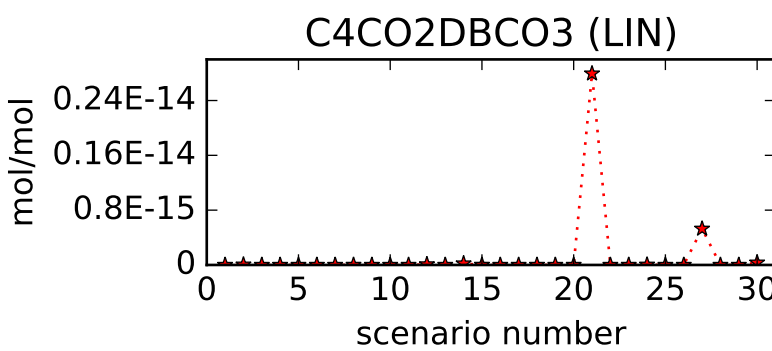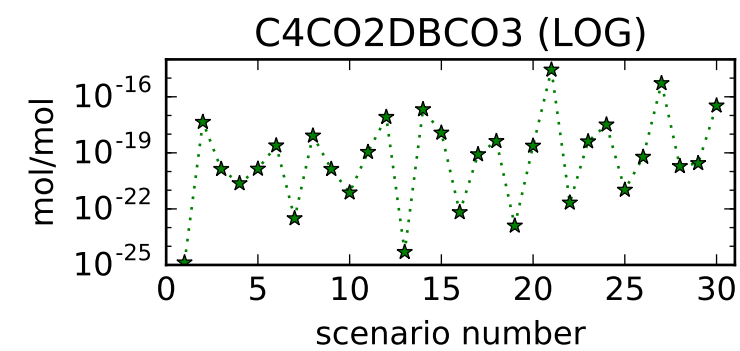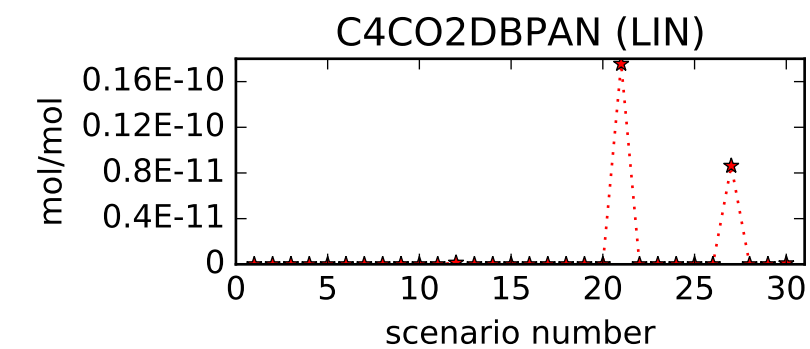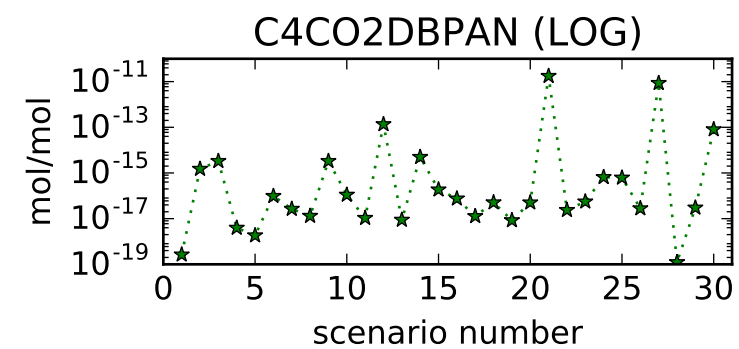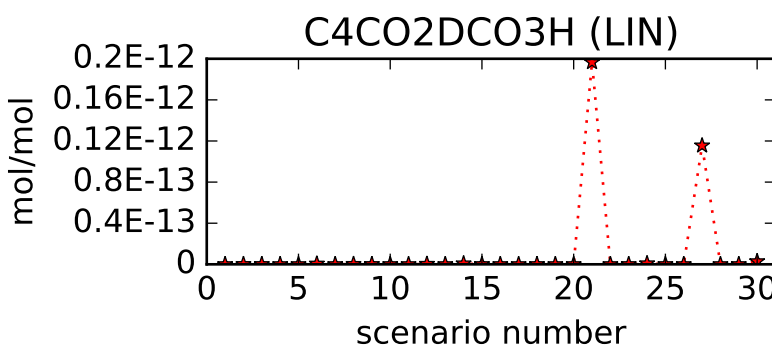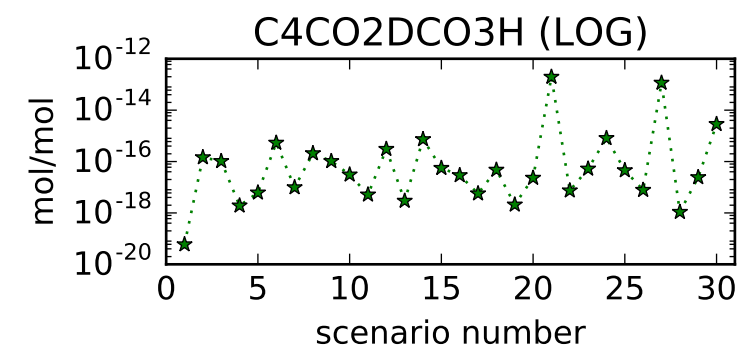

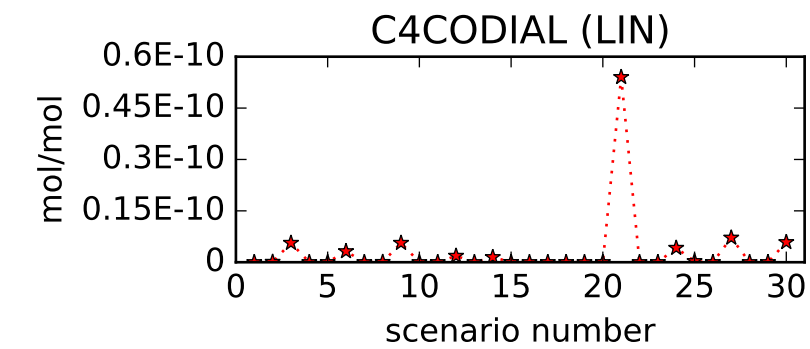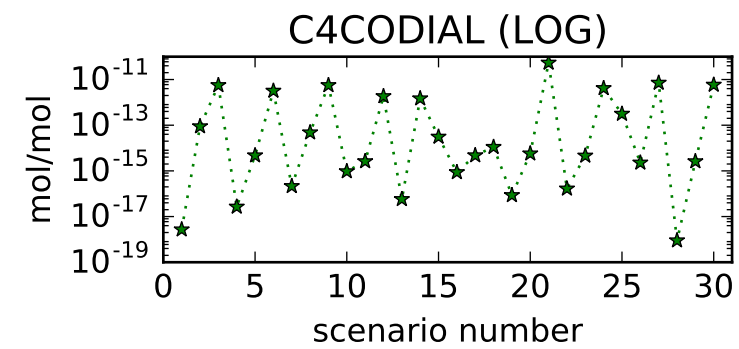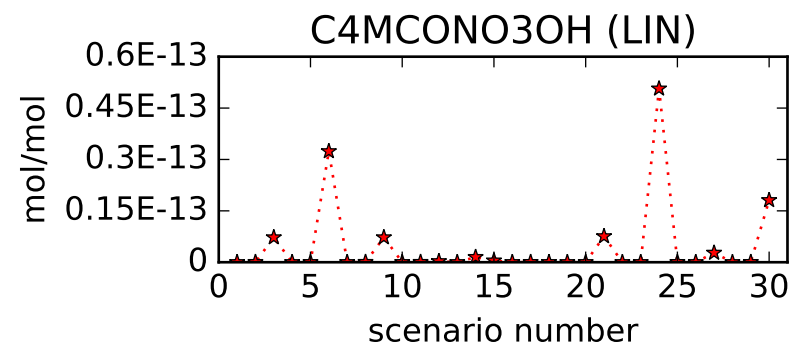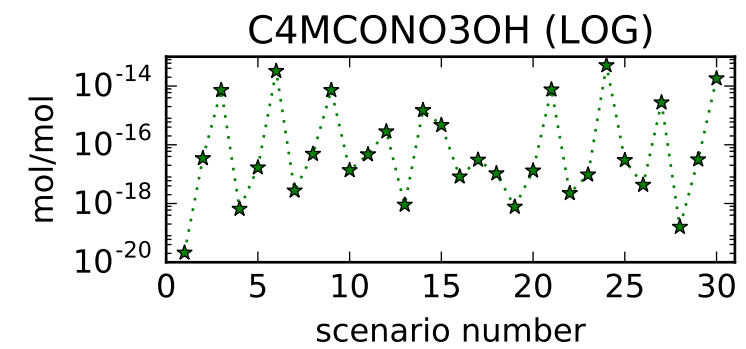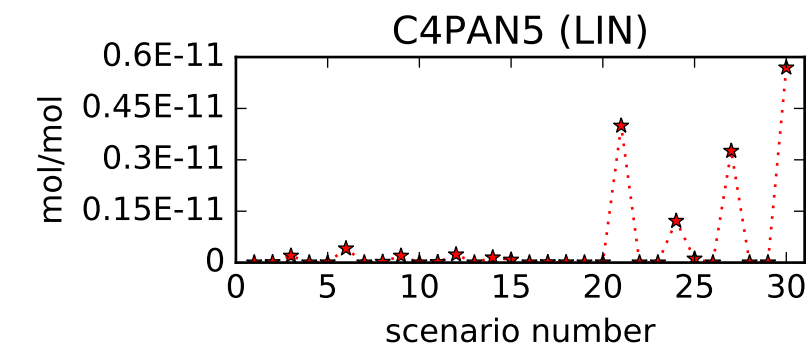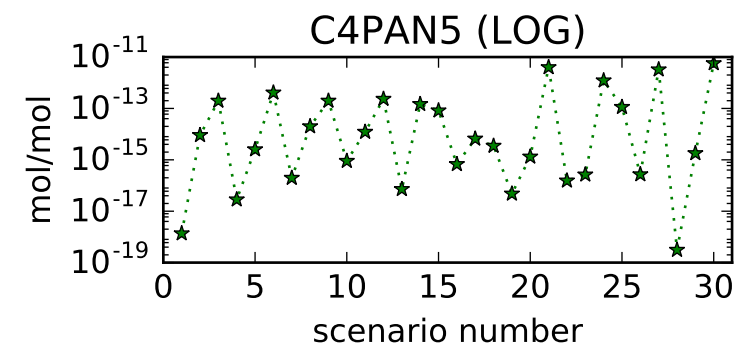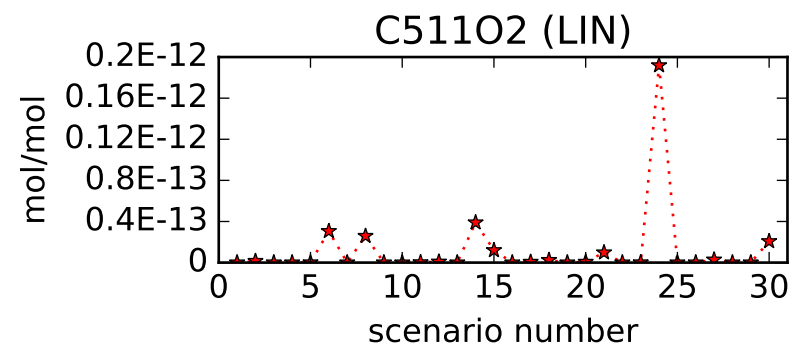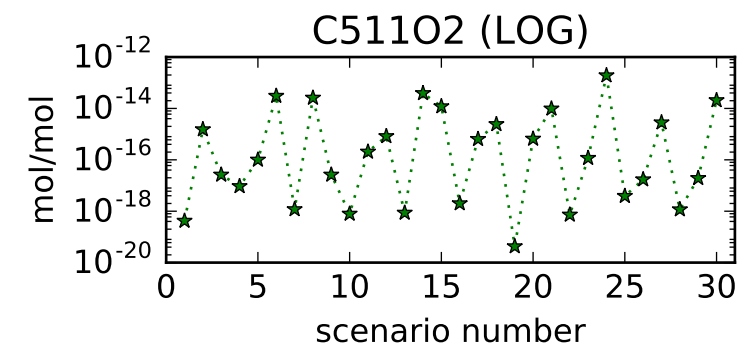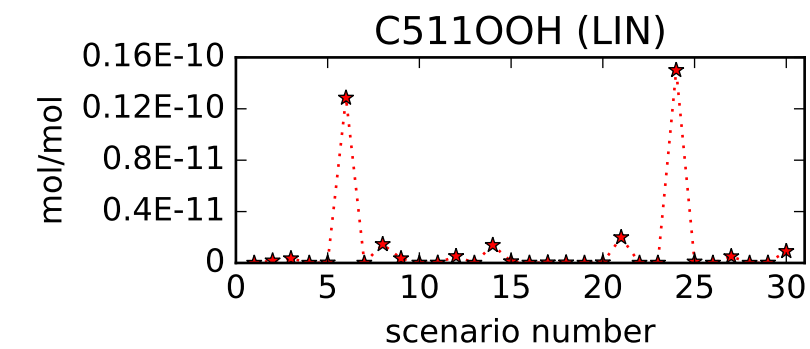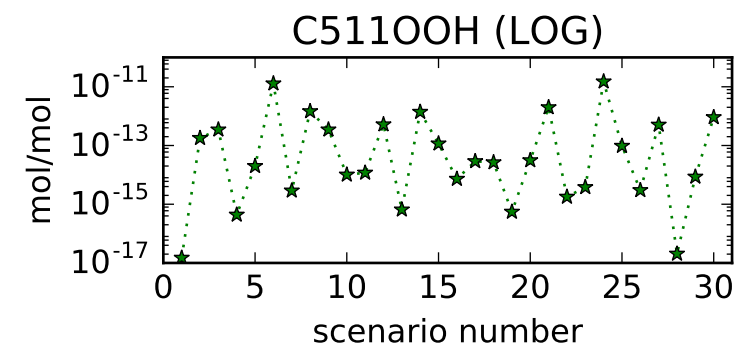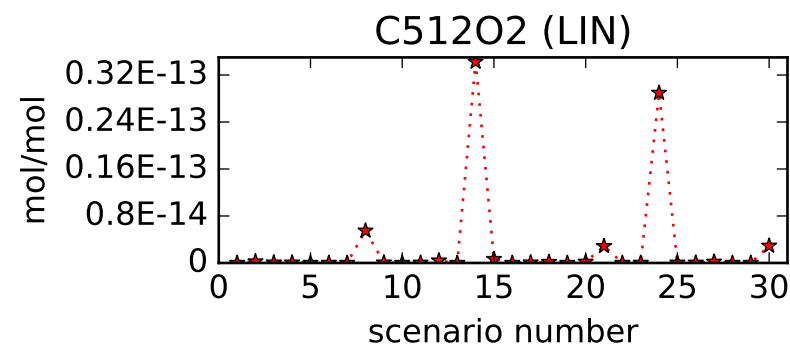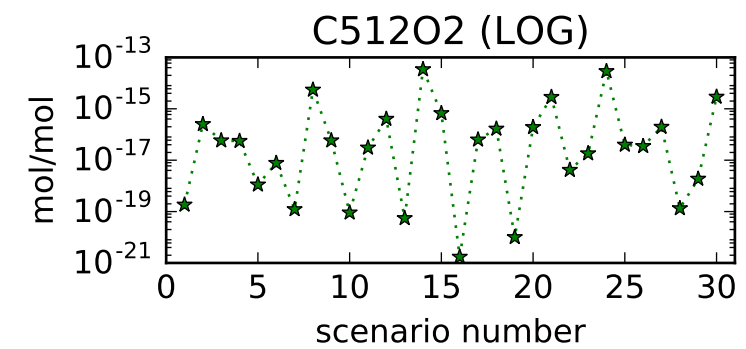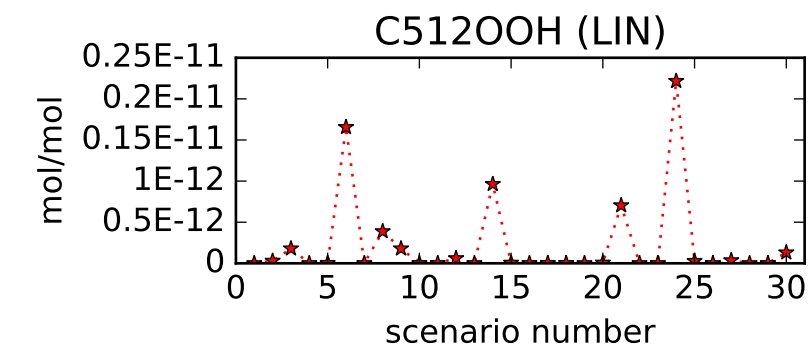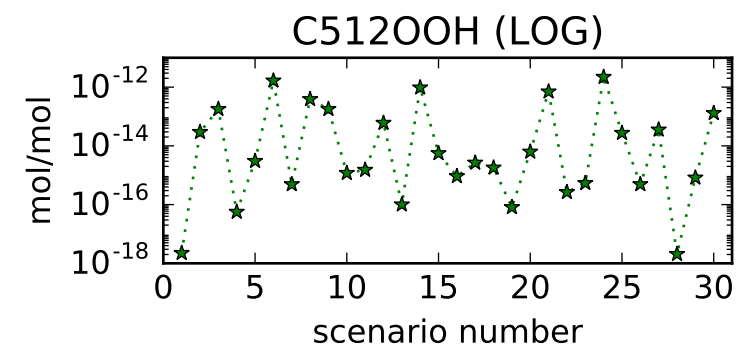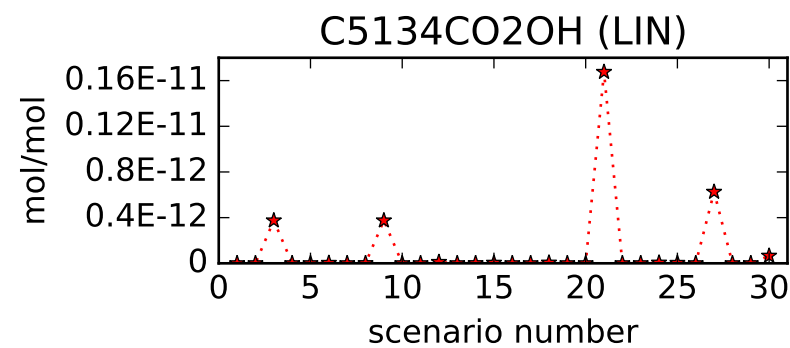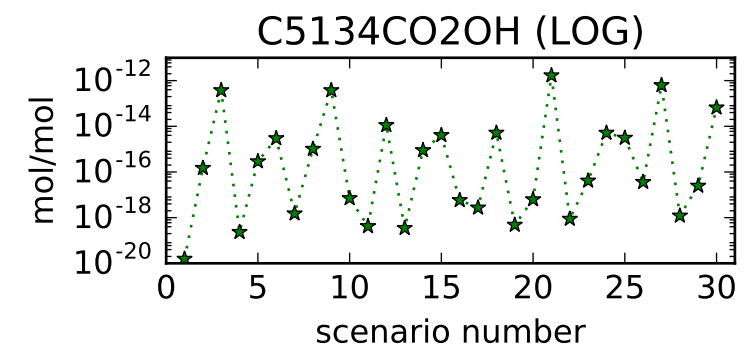



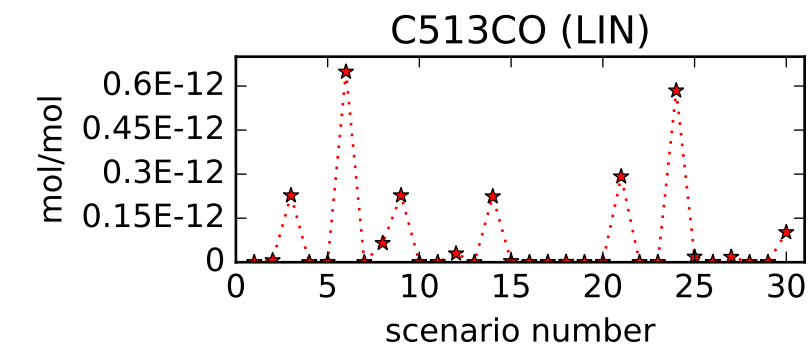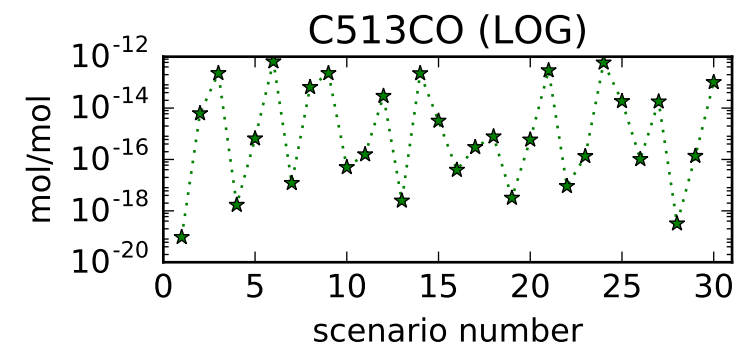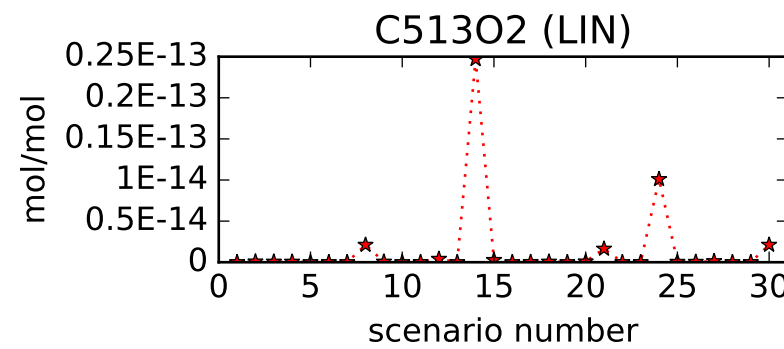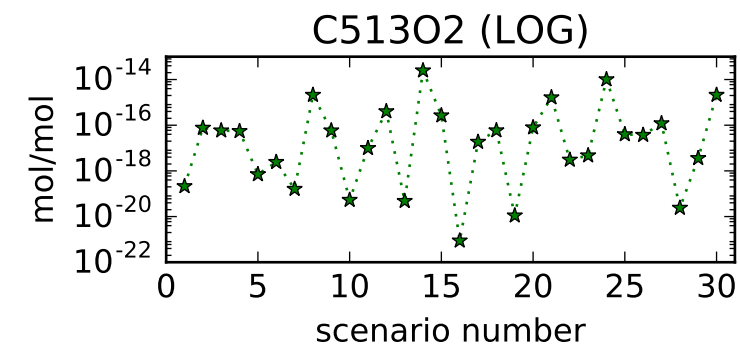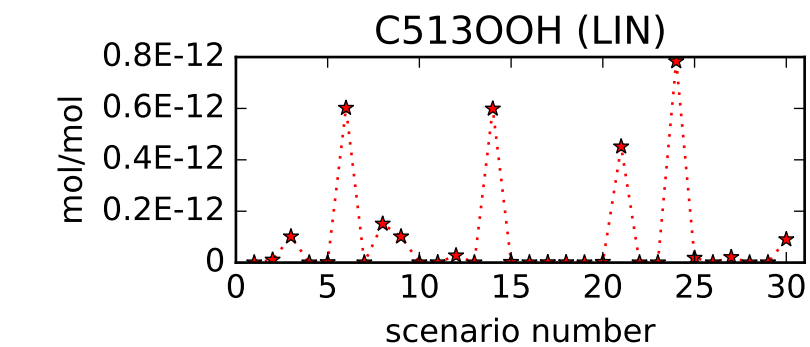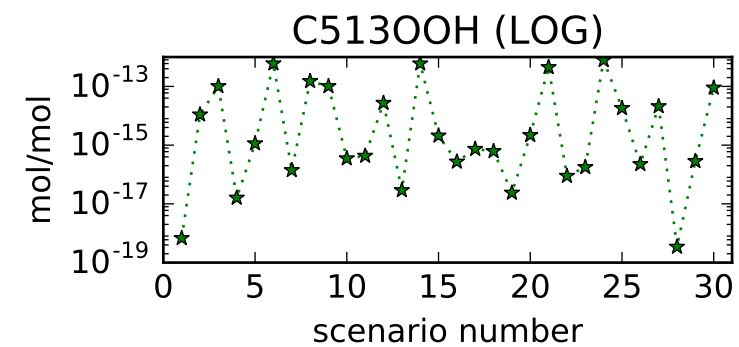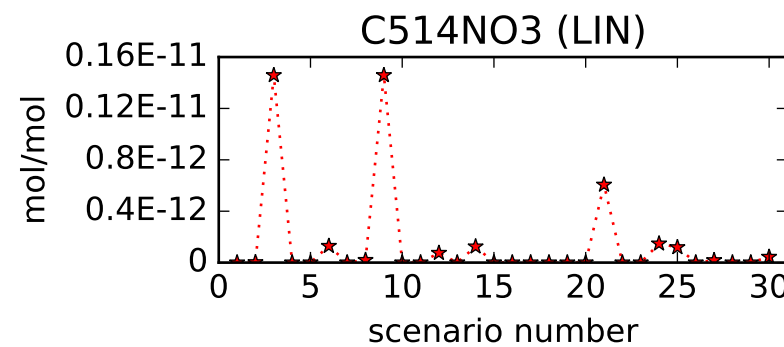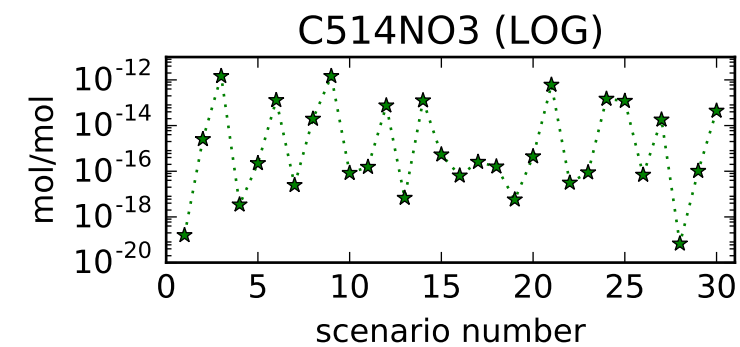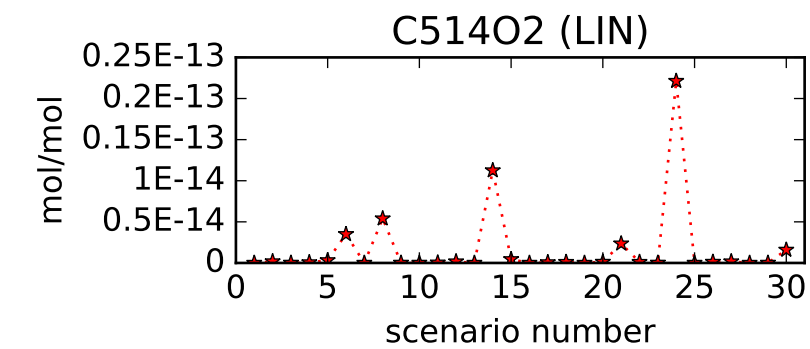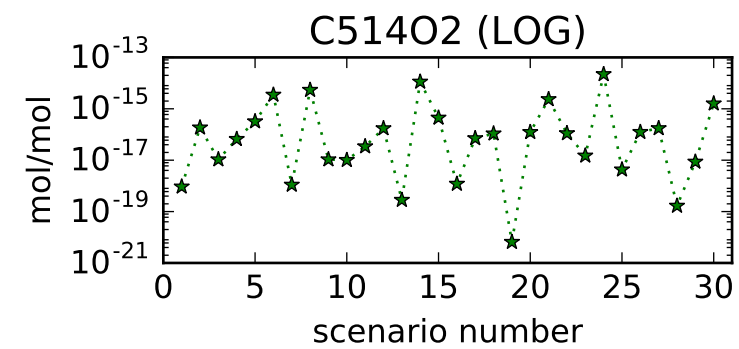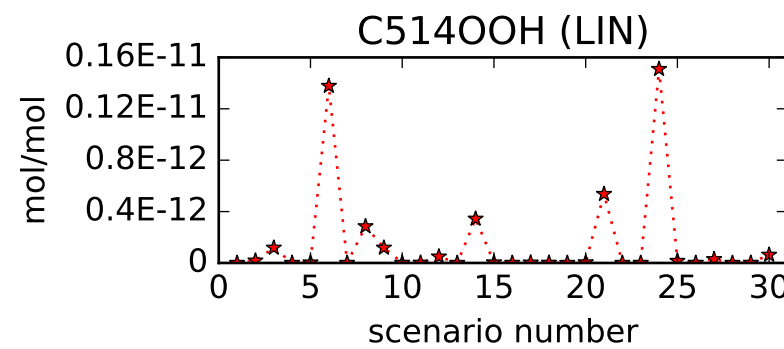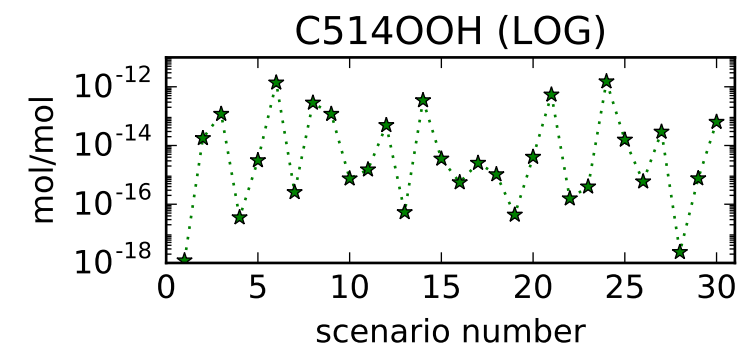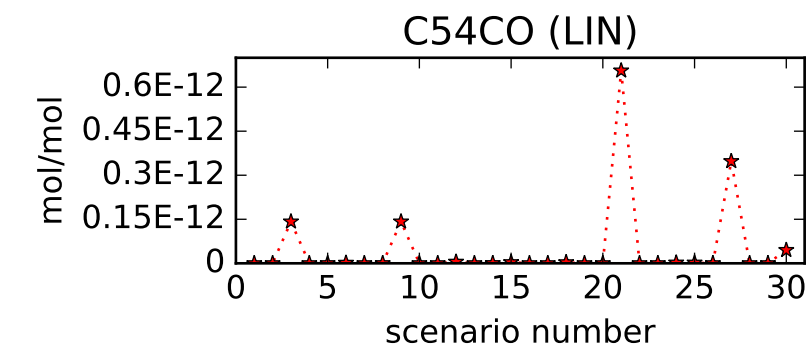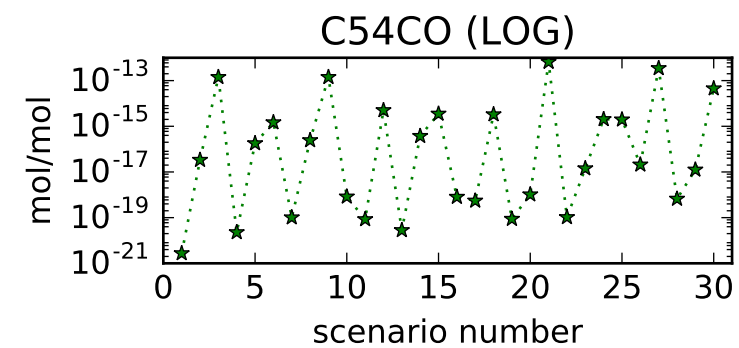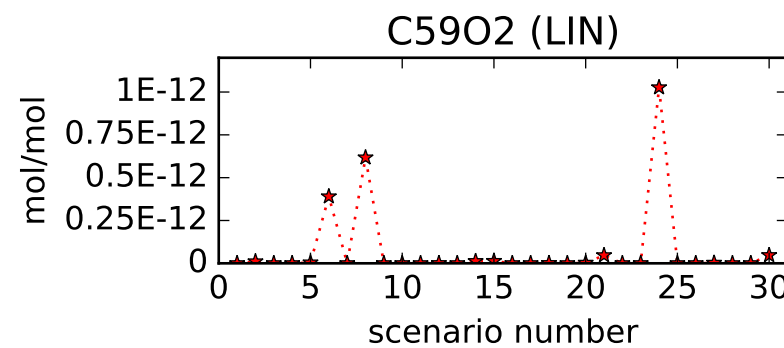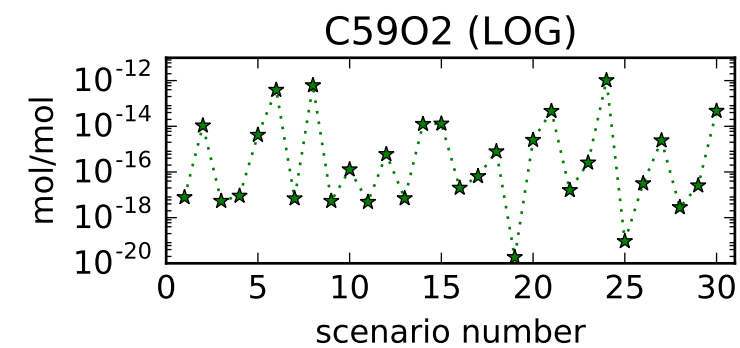

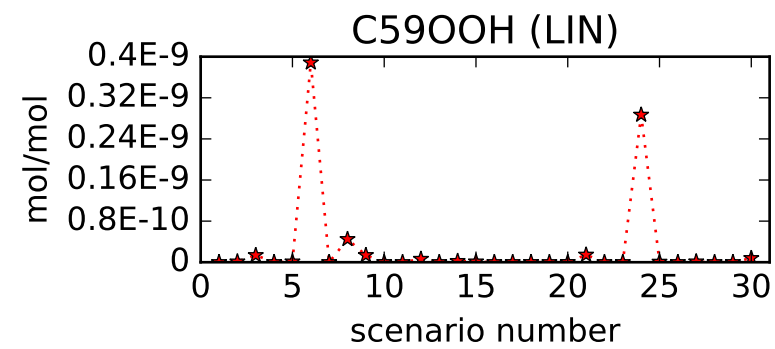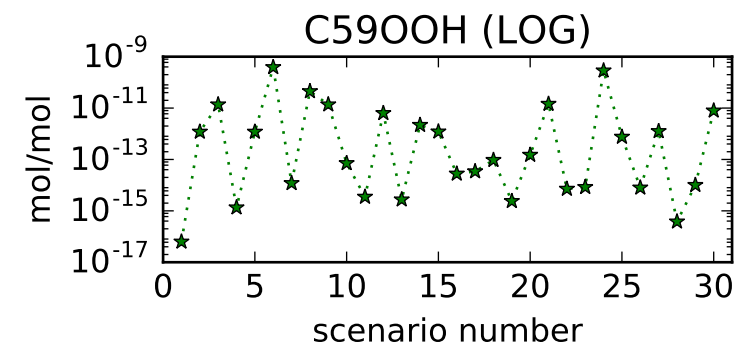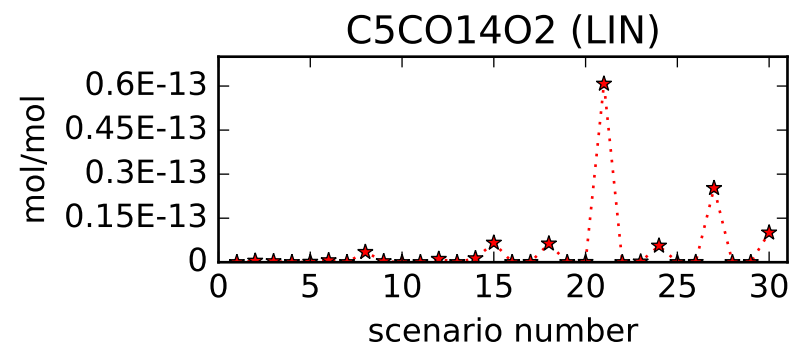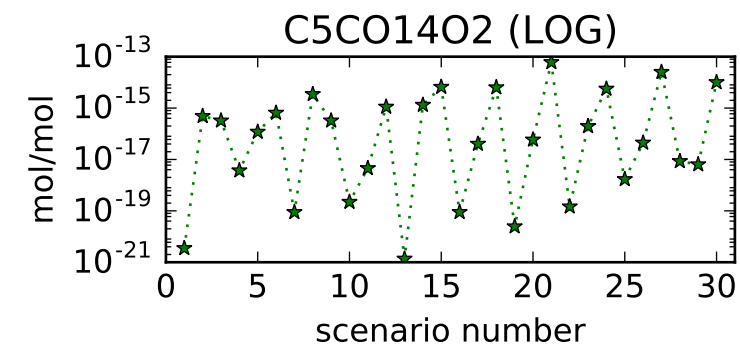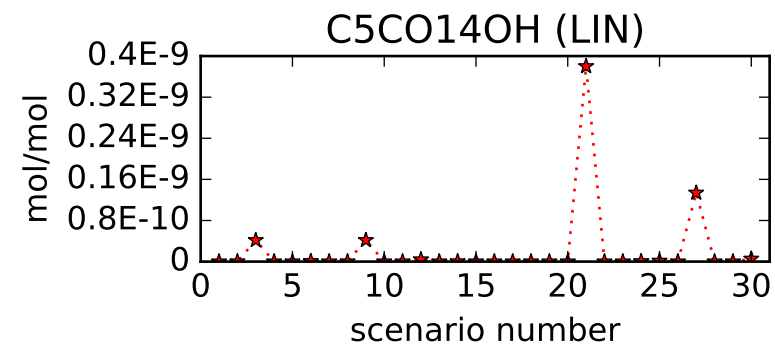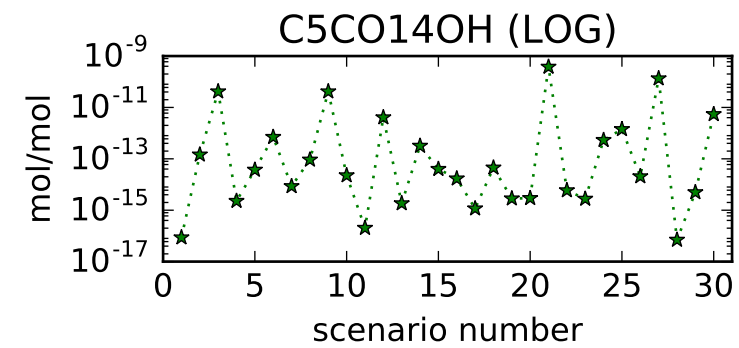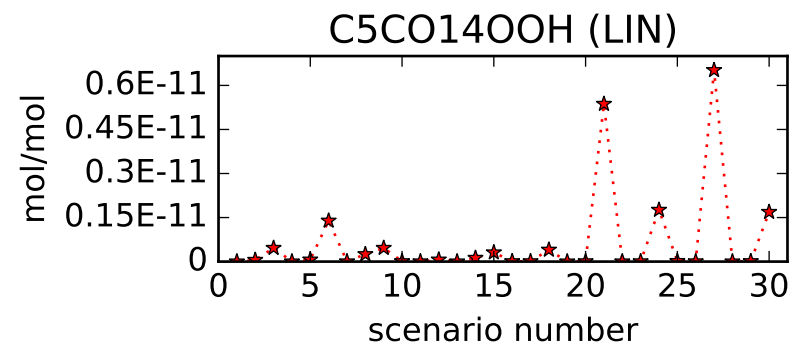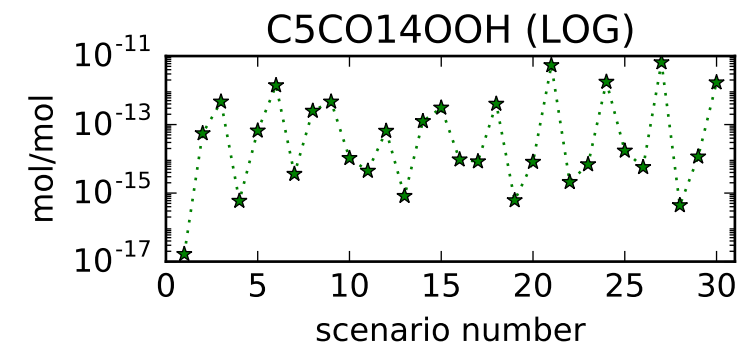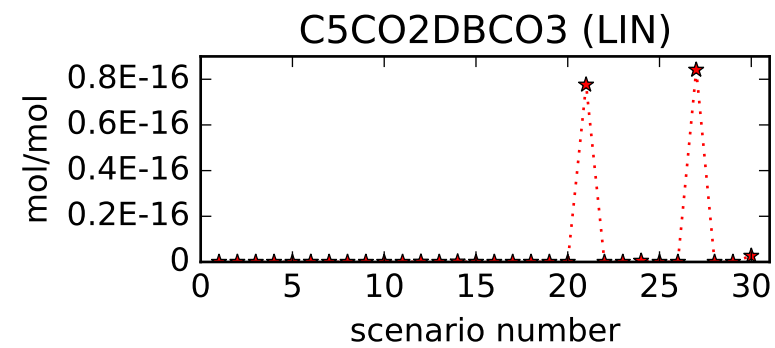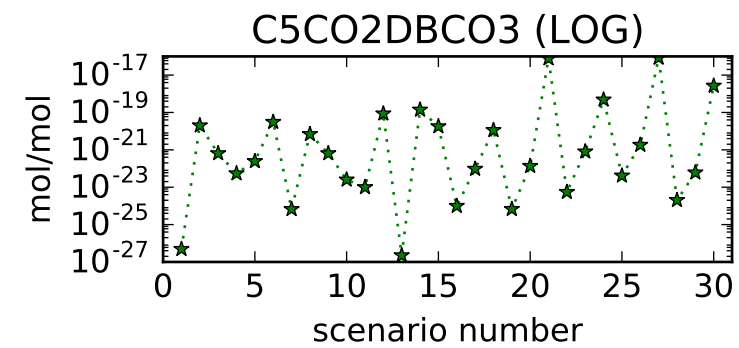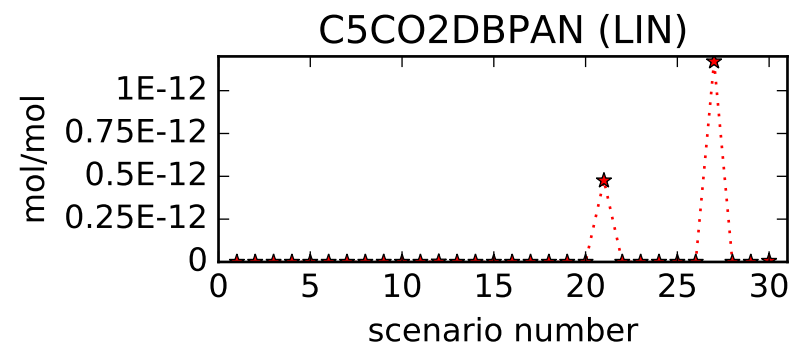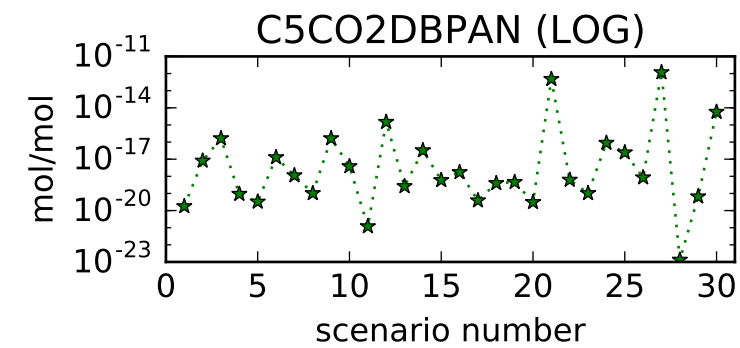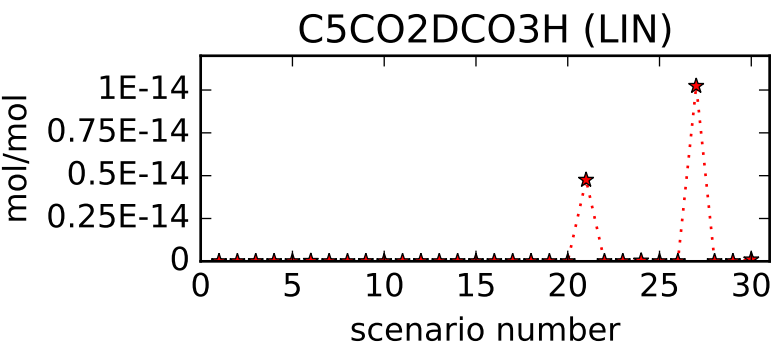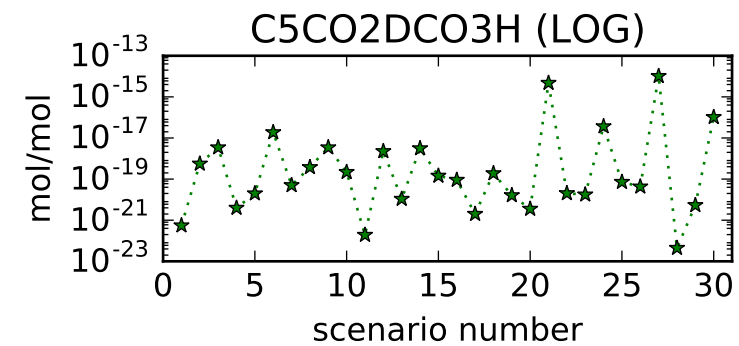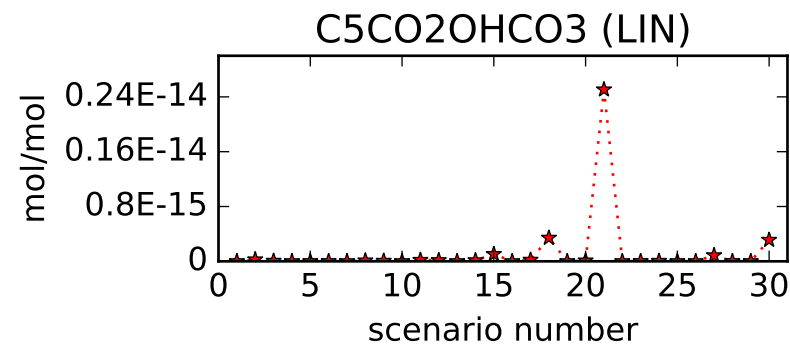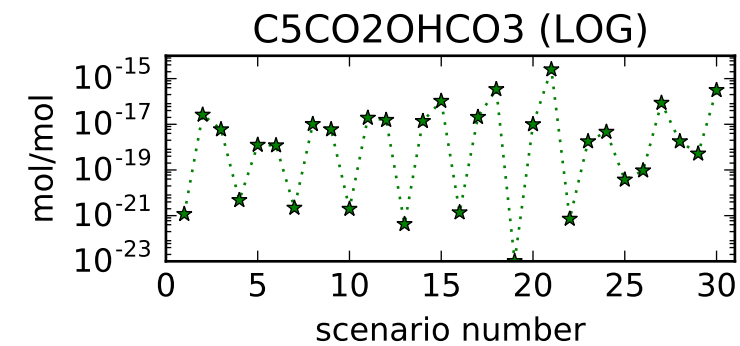

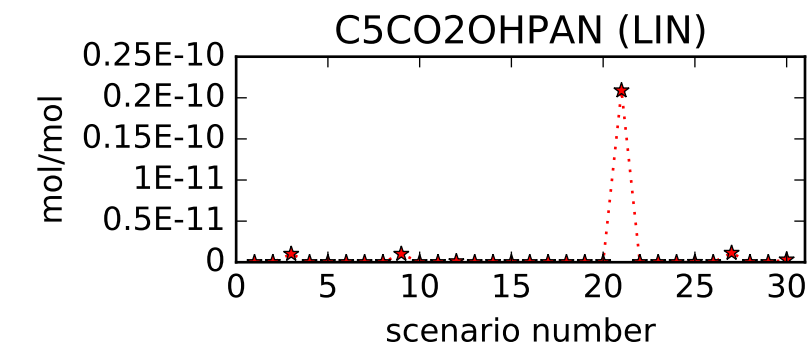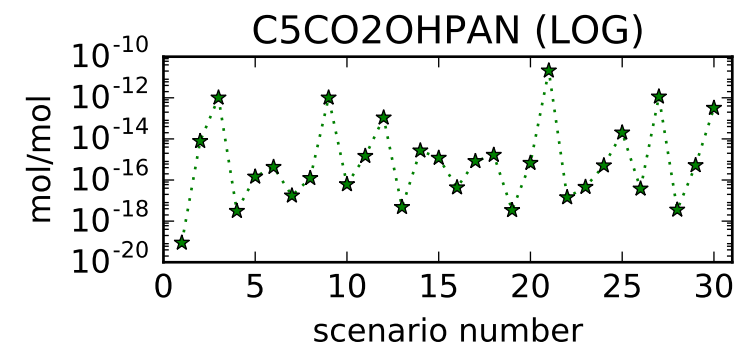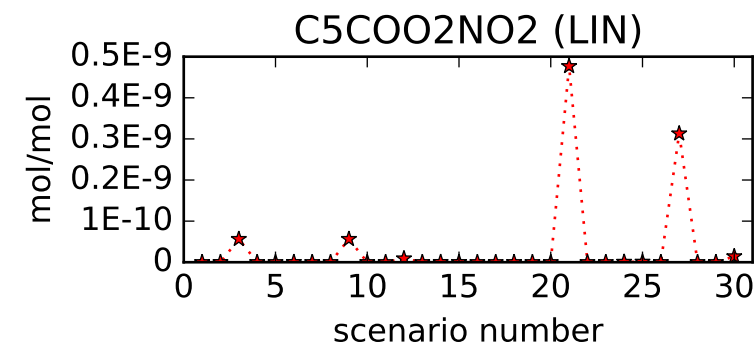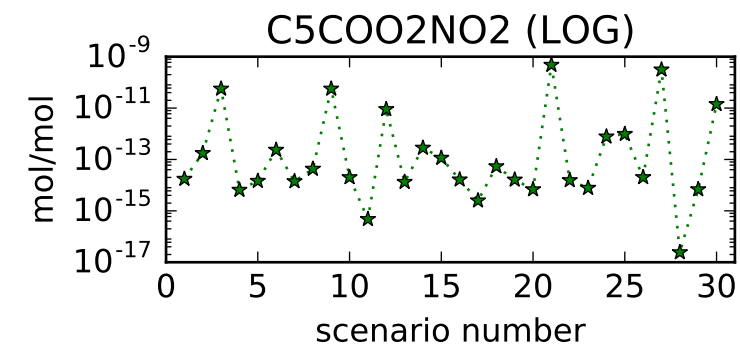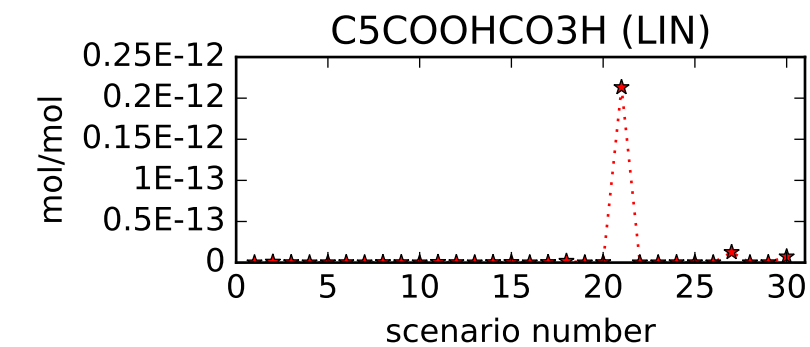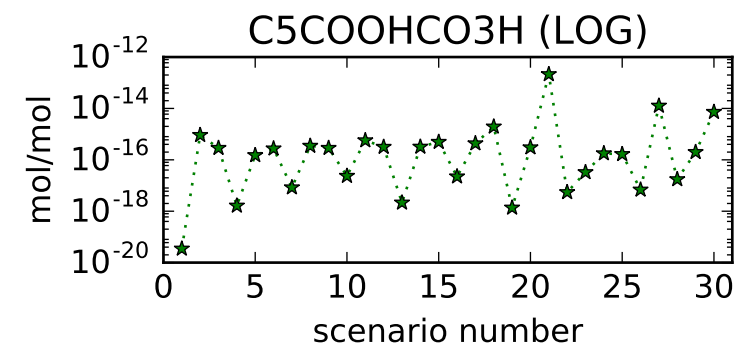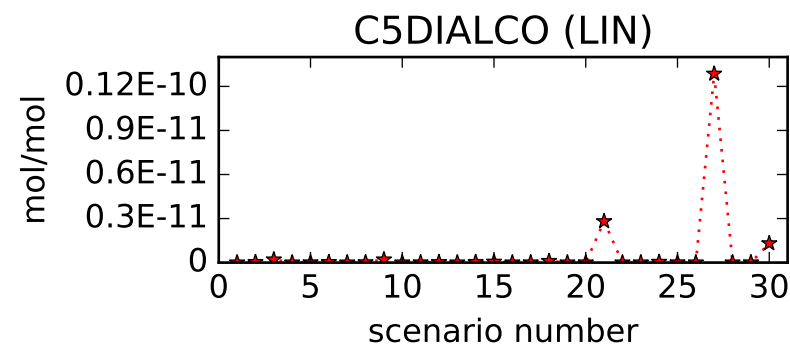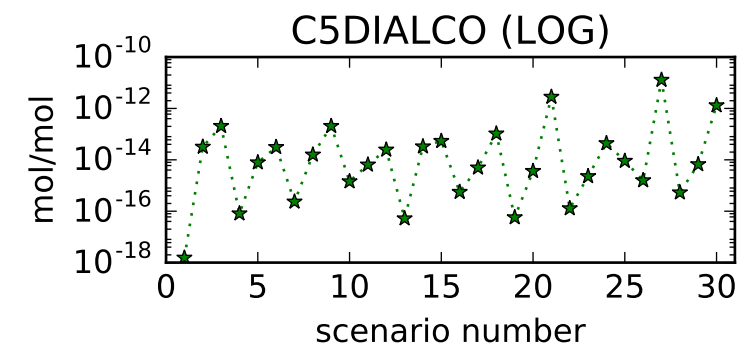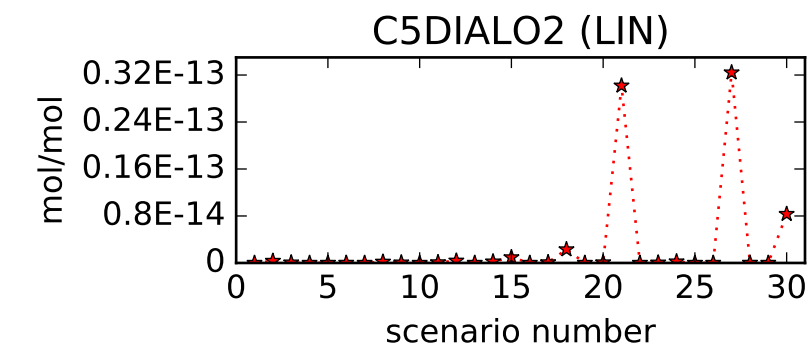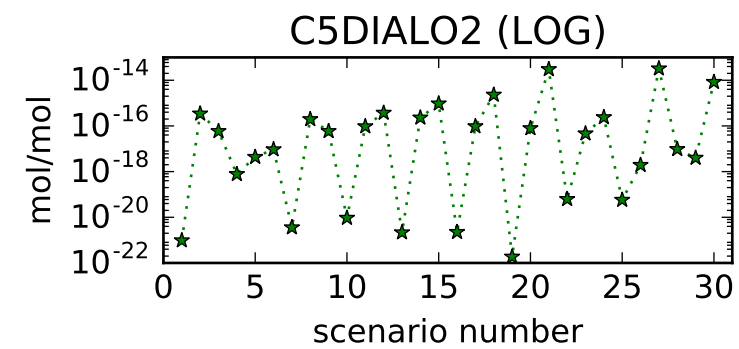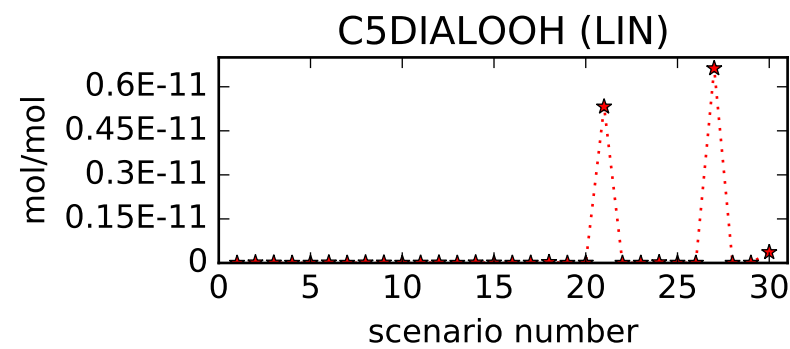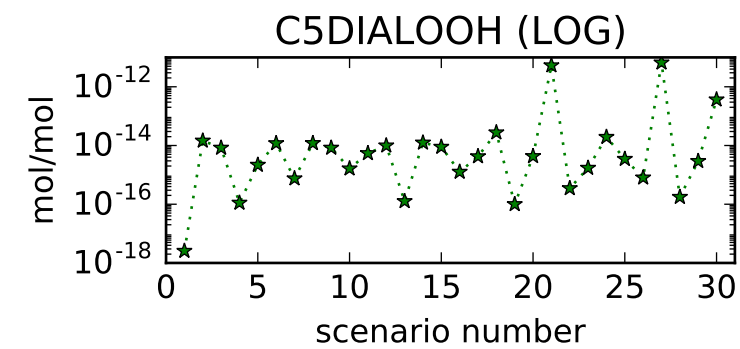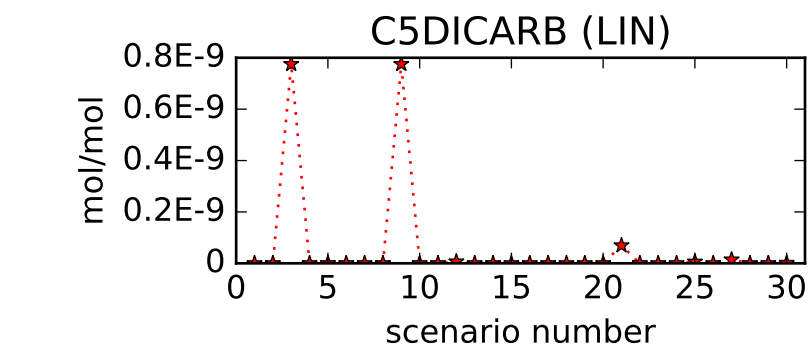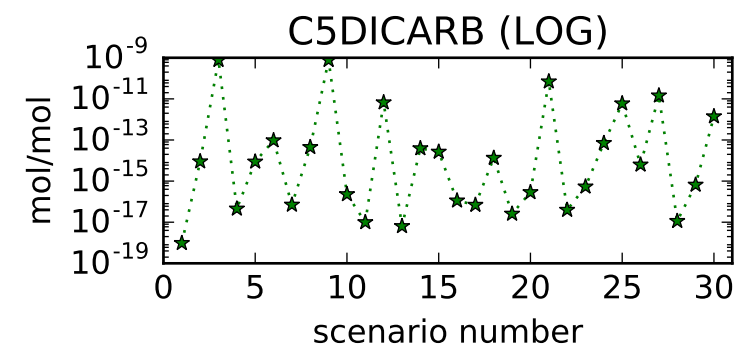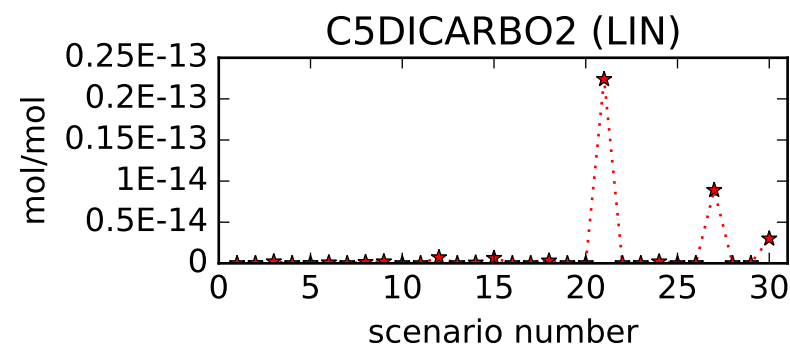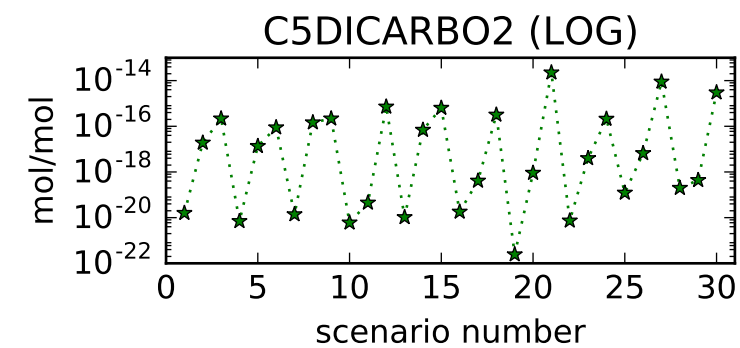

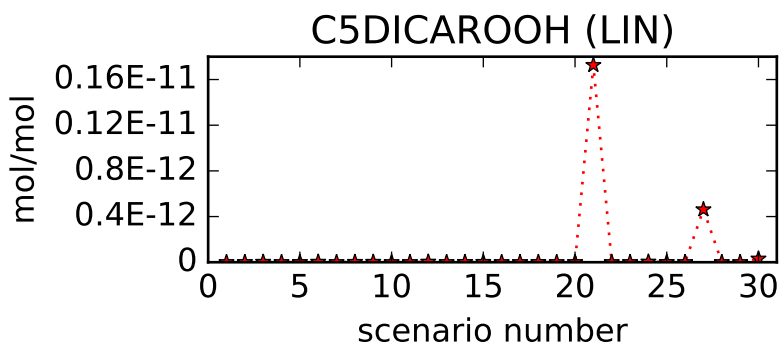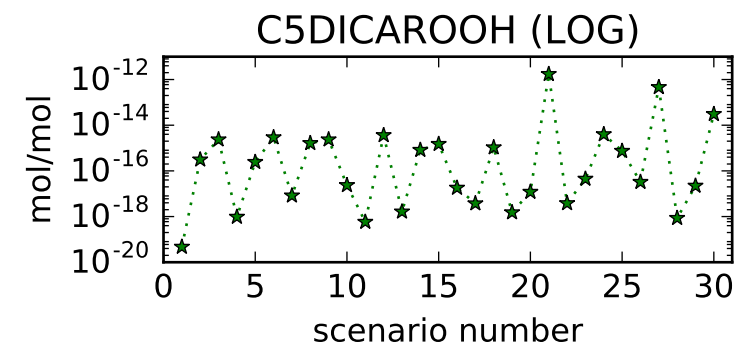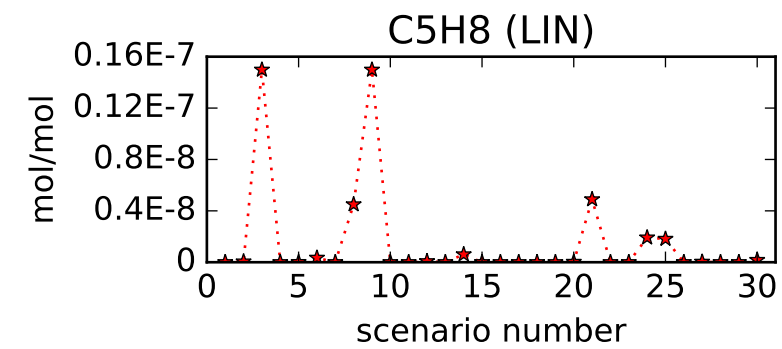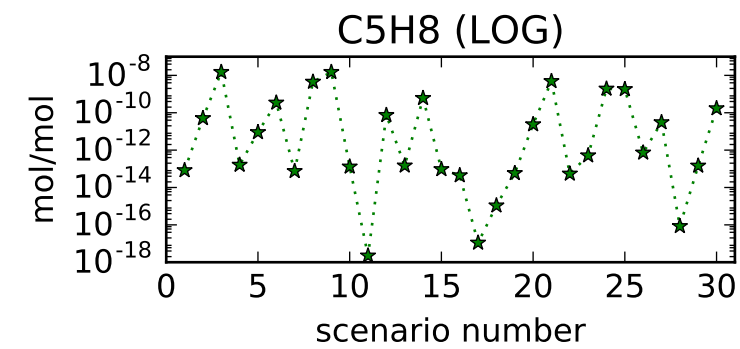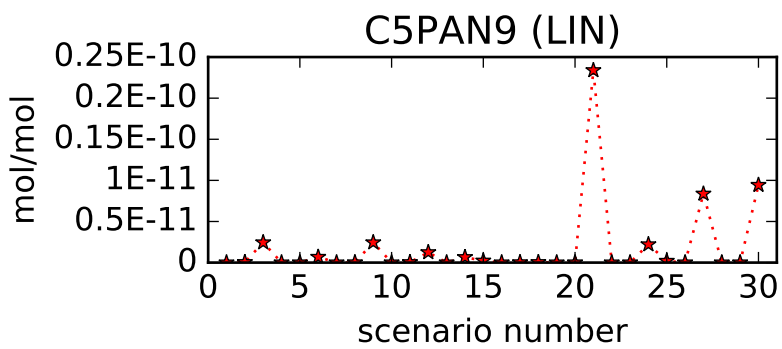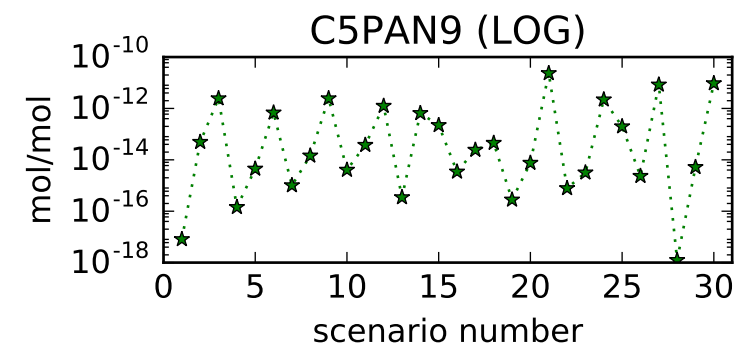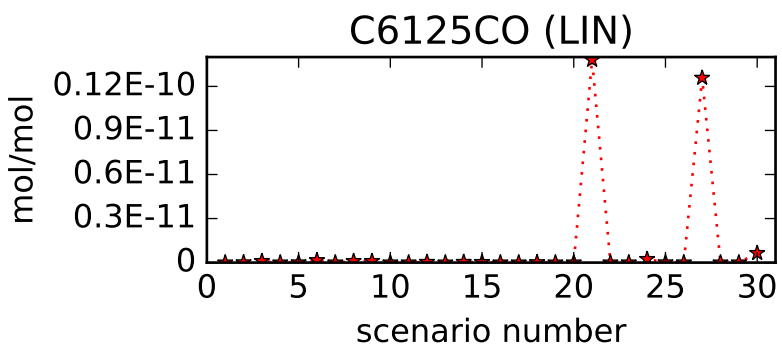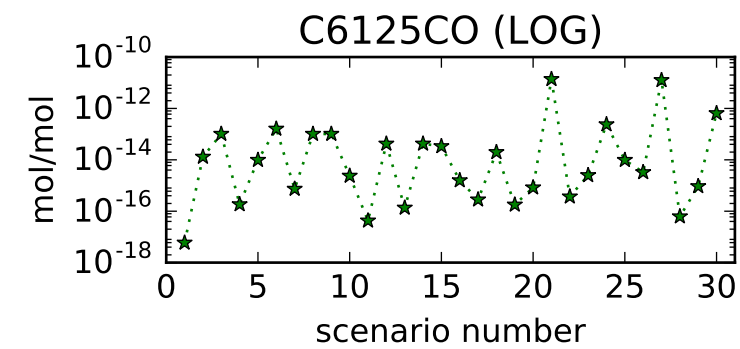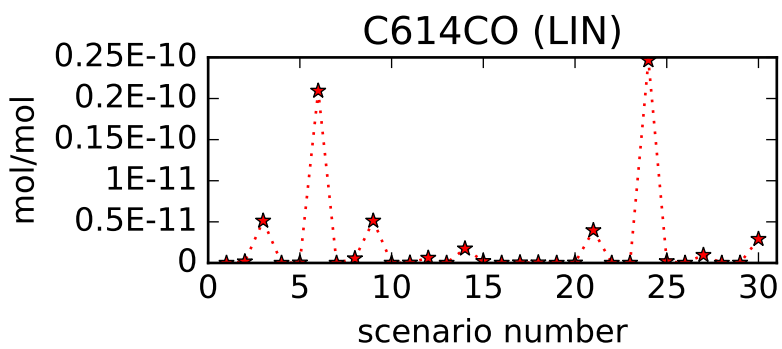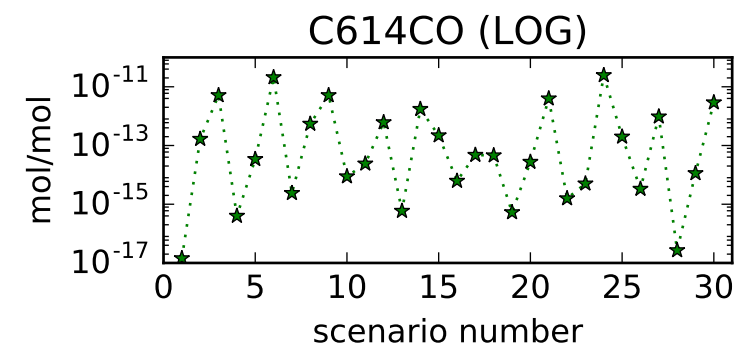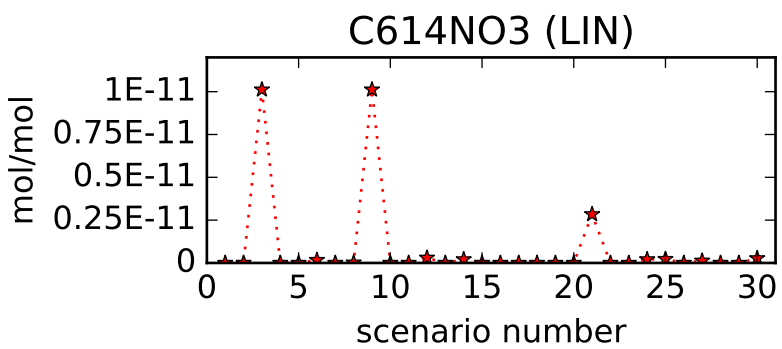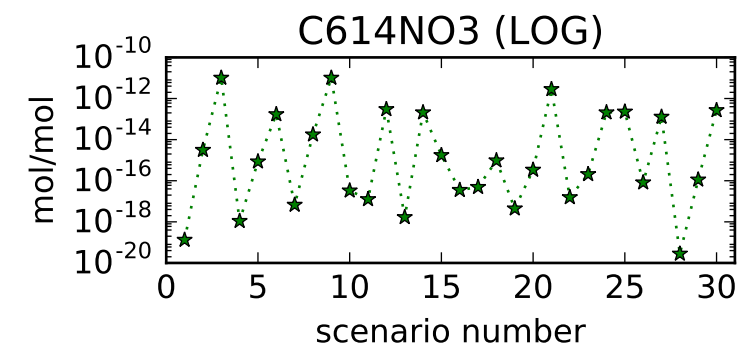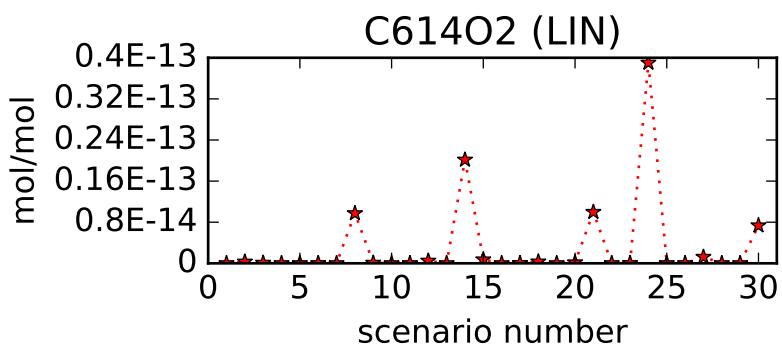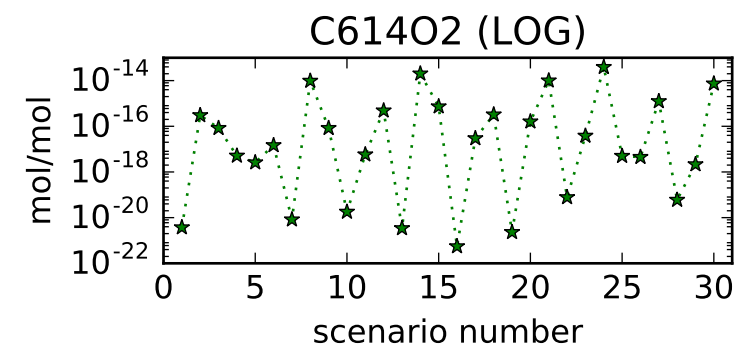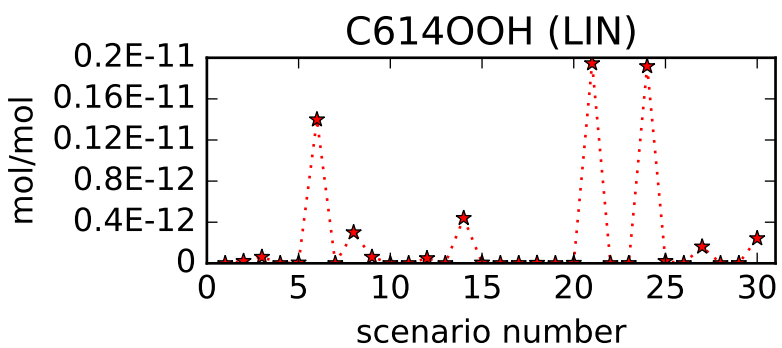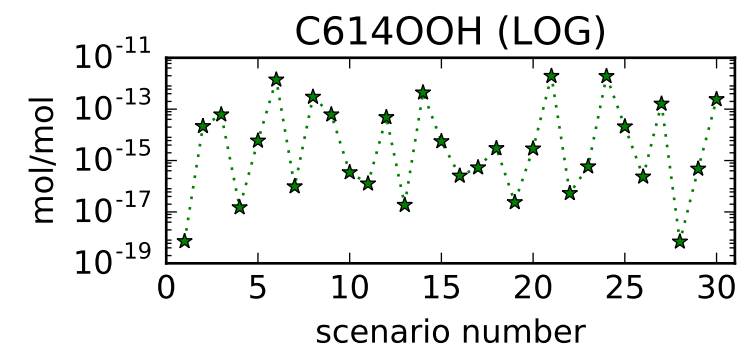

C615CO2O2 (LIN)

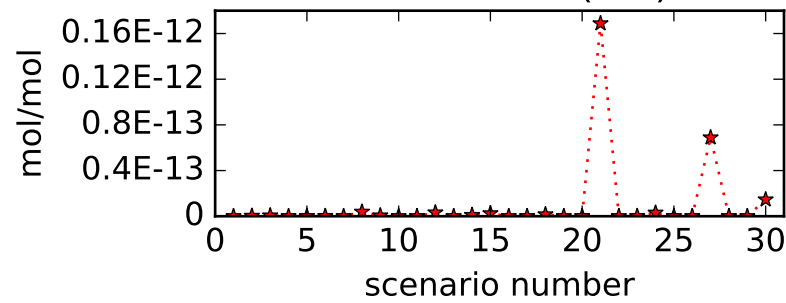

C615CO2O2 (LOG)

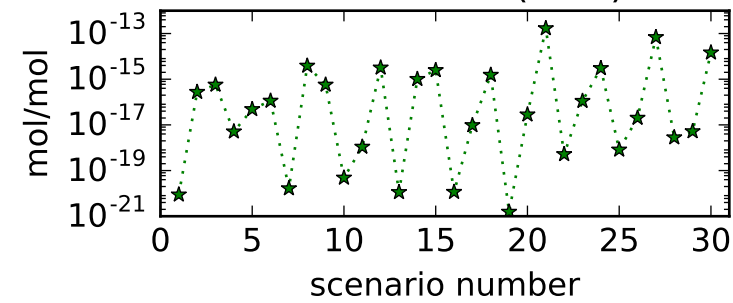

C615CO2OOH (LIN)

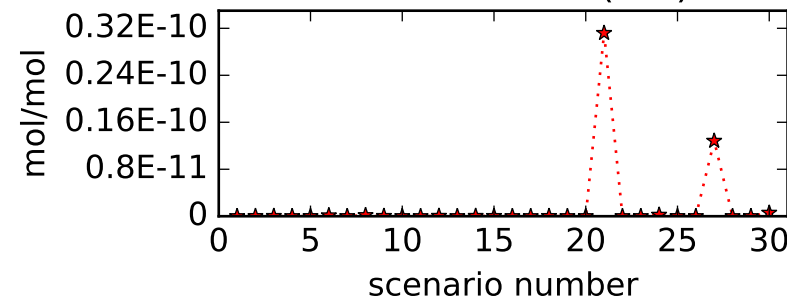

C615CO2OOH (LOG)

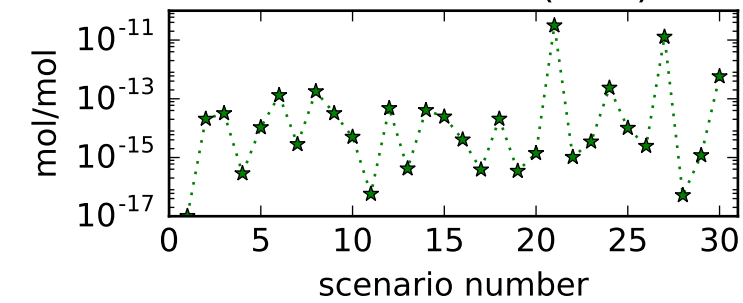

C6CO2OHCO3 (LIN)

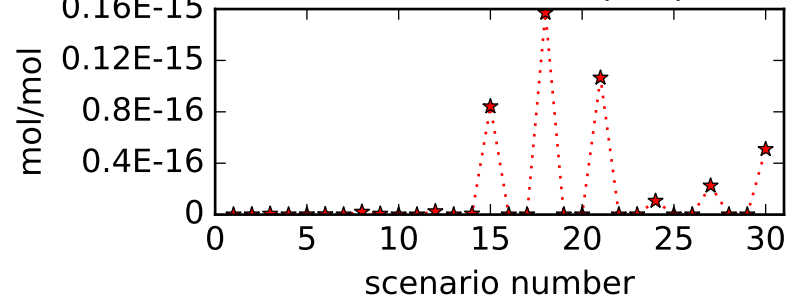

C6CO2OHCO3 (LOG)

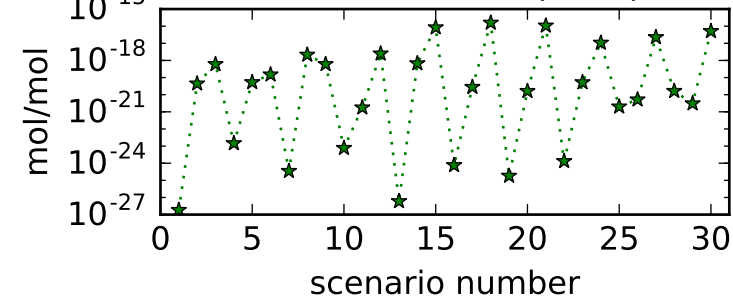

C6CO2OHPAN (LIN)

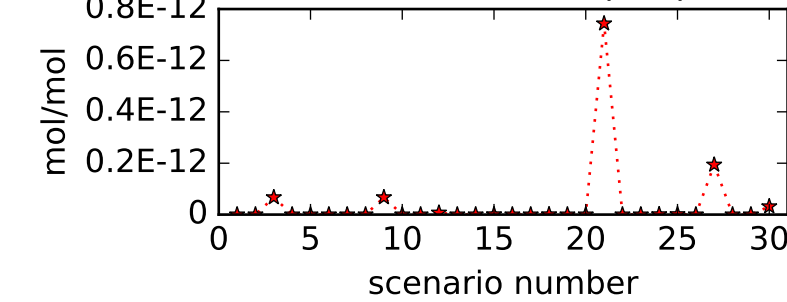

C6CO2OHPAN (LOG)

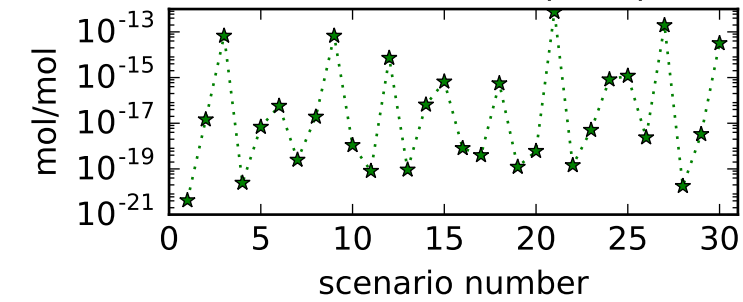

C6CO4DB (LIN)

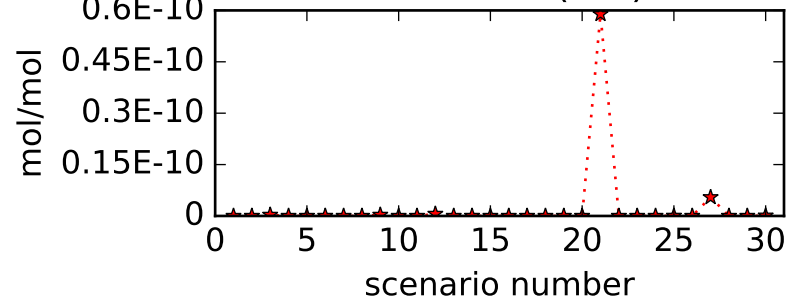

C6CO4DB (LOG)

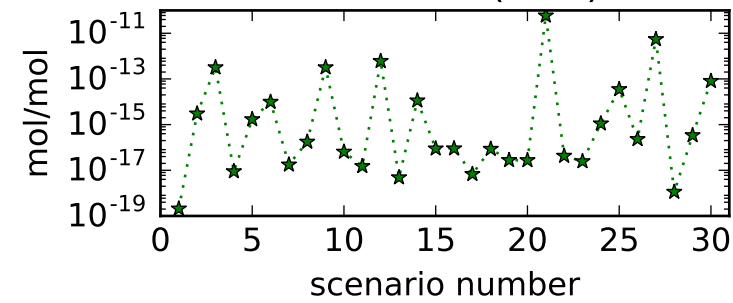

C6COOHCO3H (LIN)

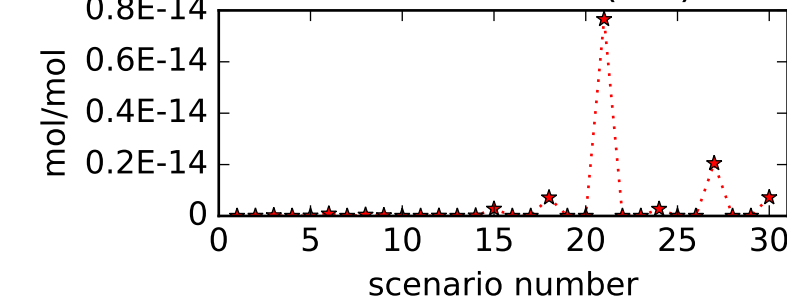

C6COOHCO3H (LOG)

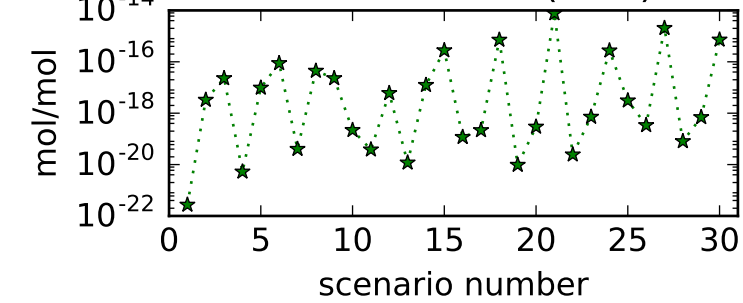

C6H5CH2NO3 (LIN)

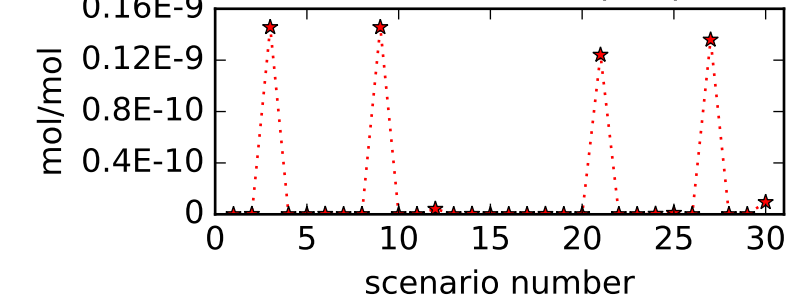

C6H5CH2NO3 (LOG)

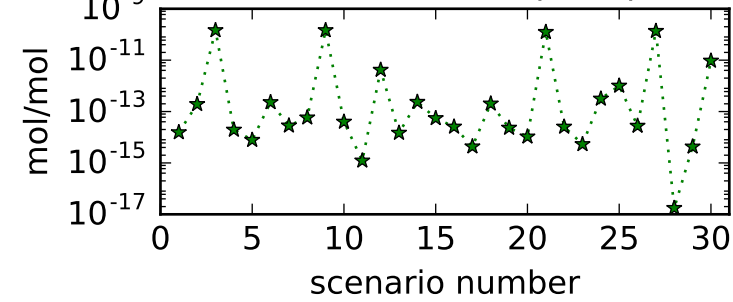

C6H5CH2O2 (LIN)

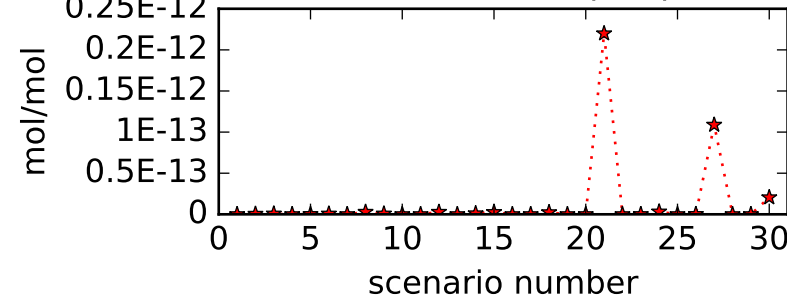

C6H5CH2O2 (LOG)

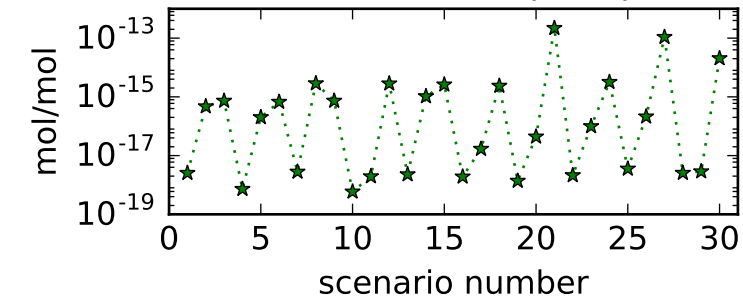



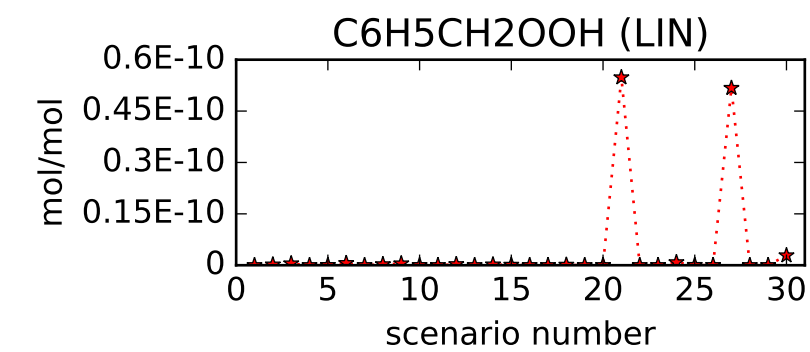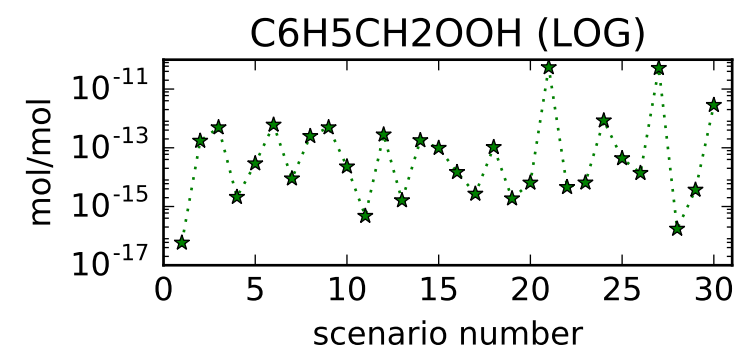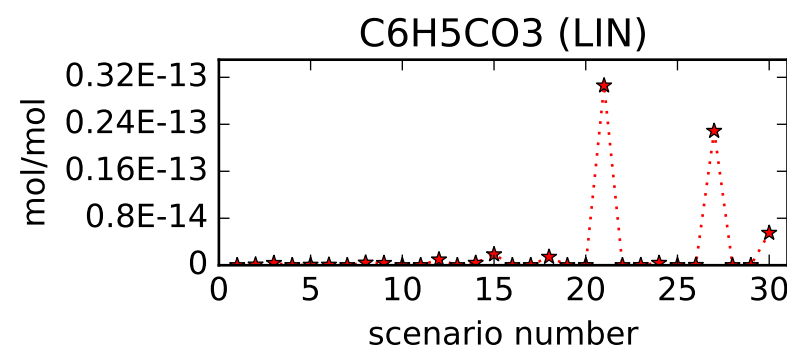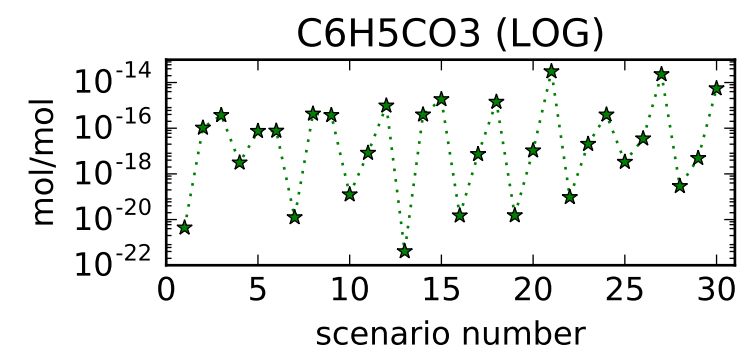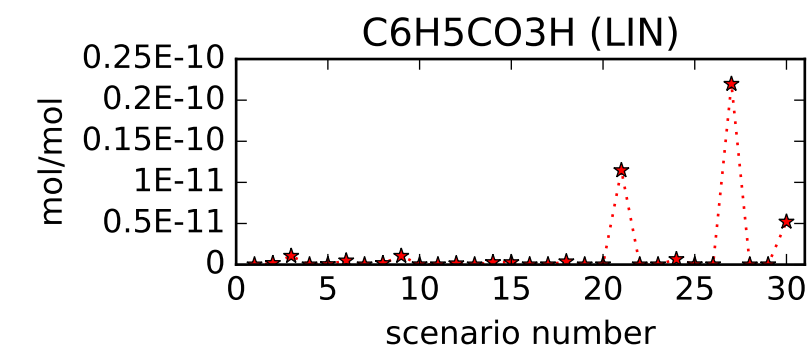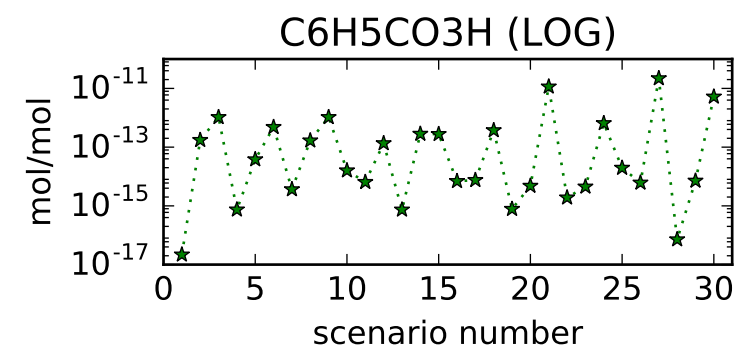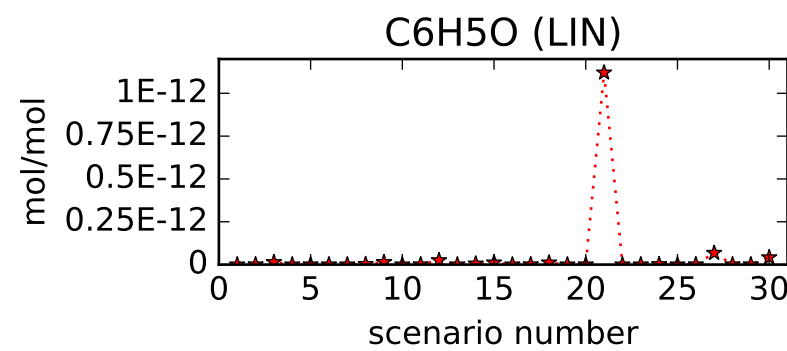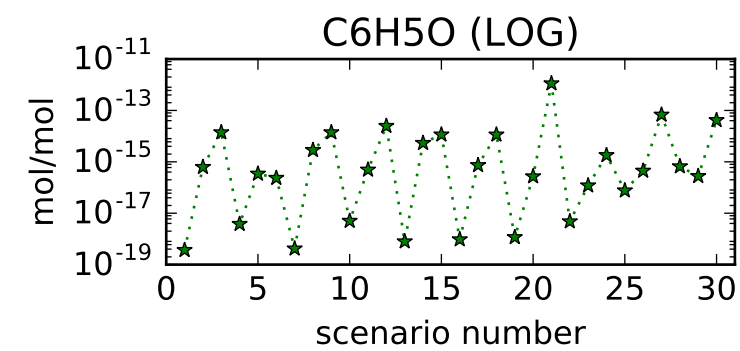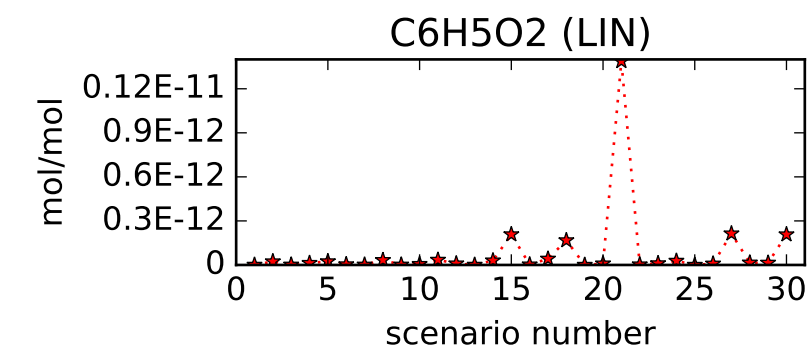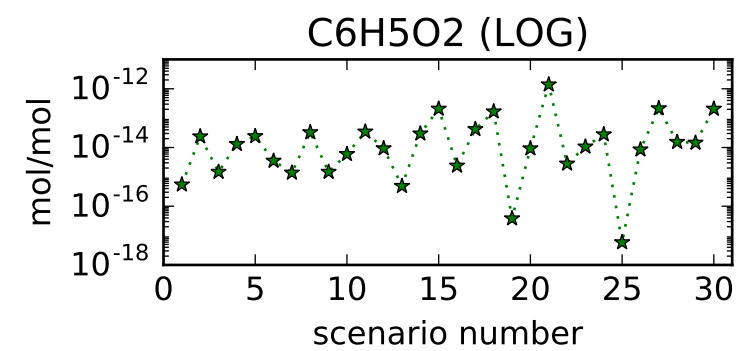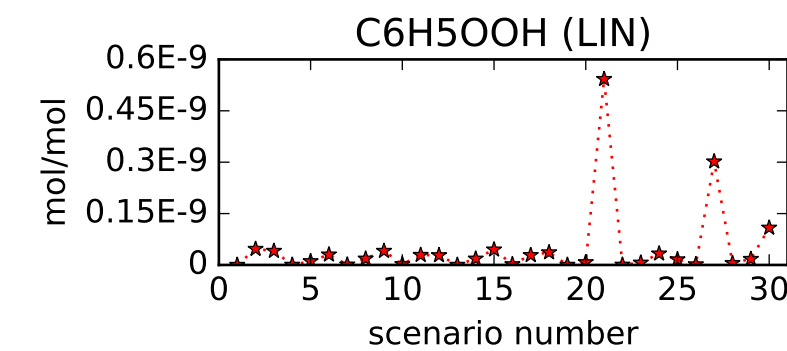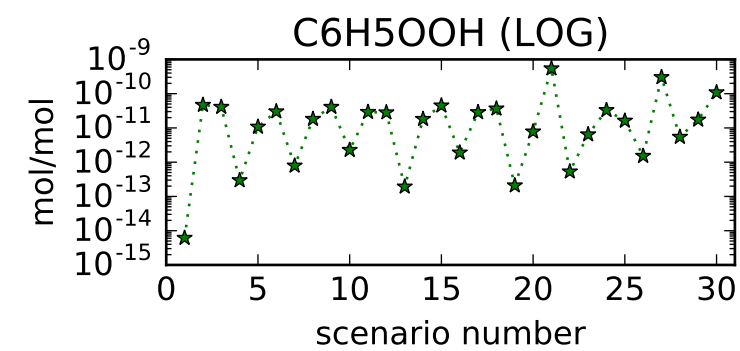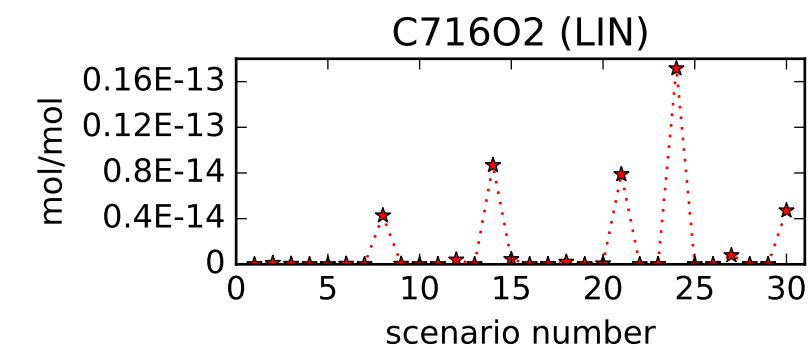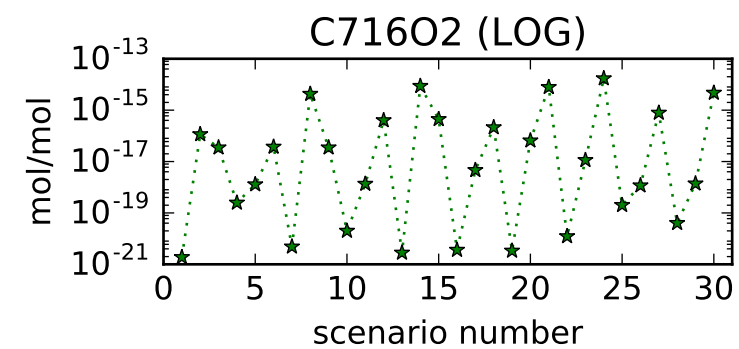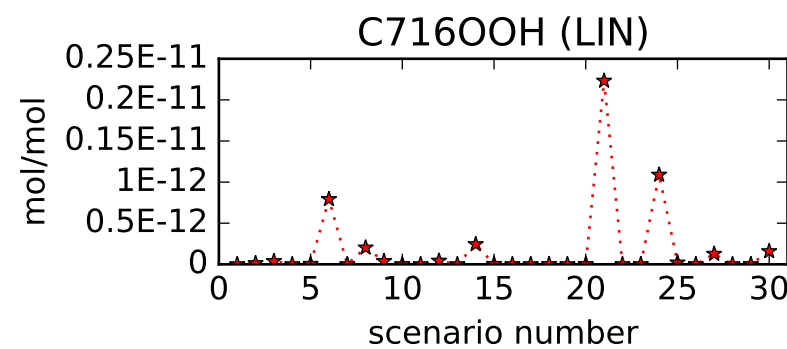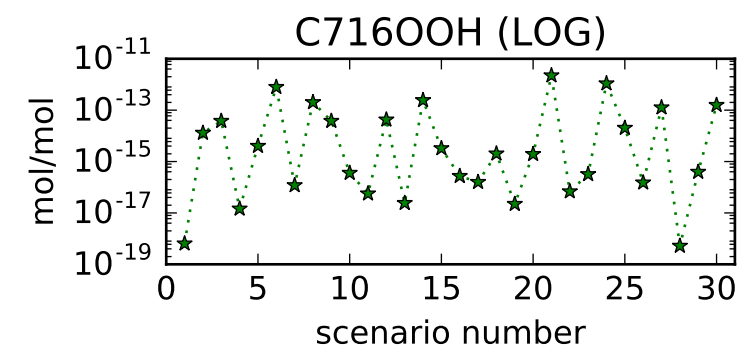

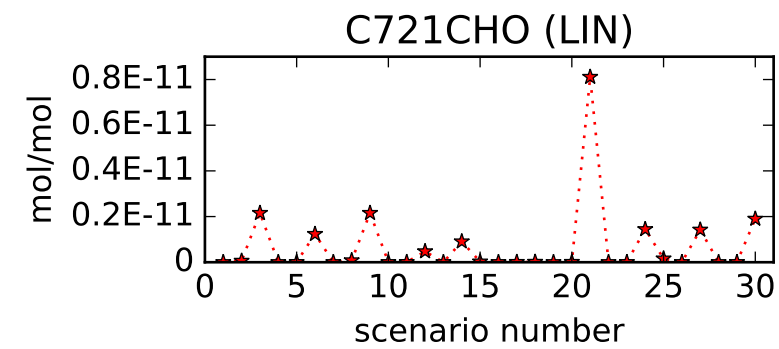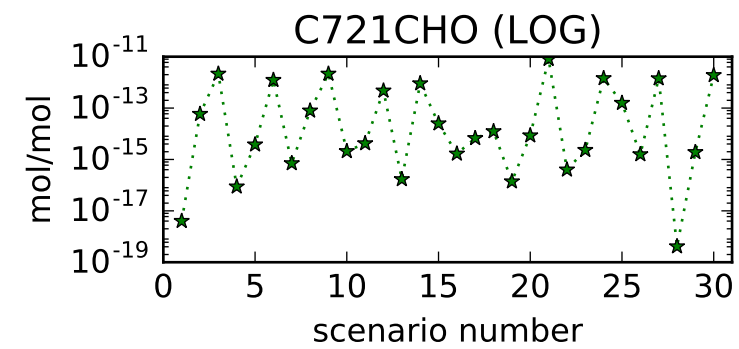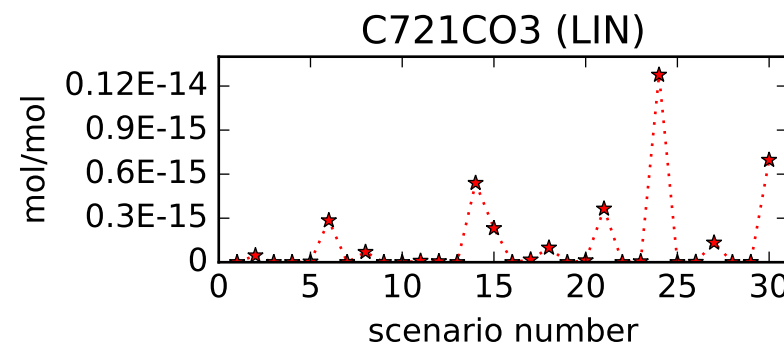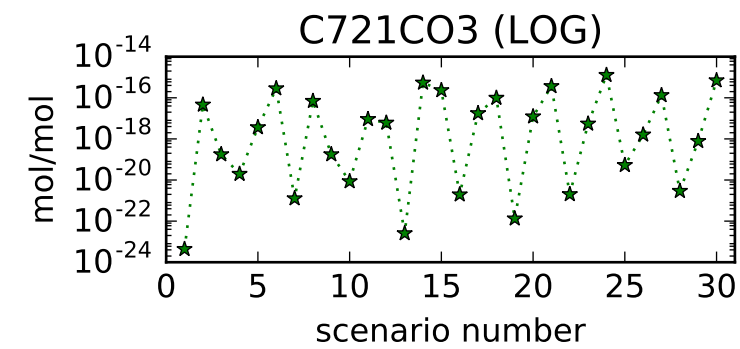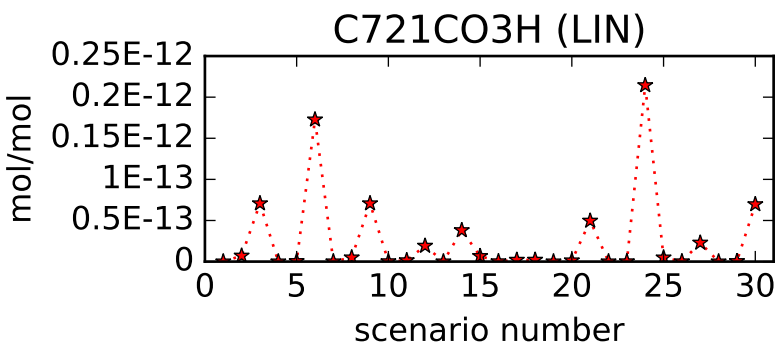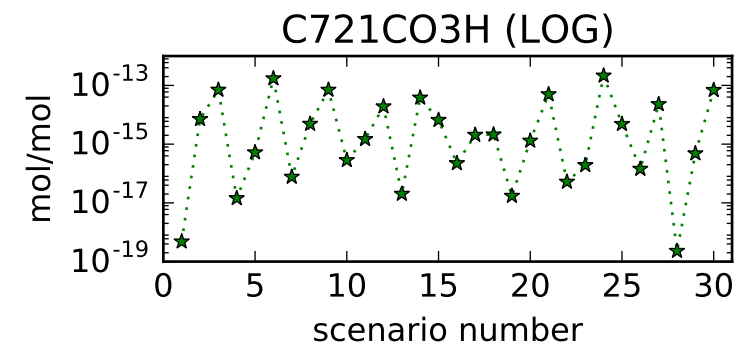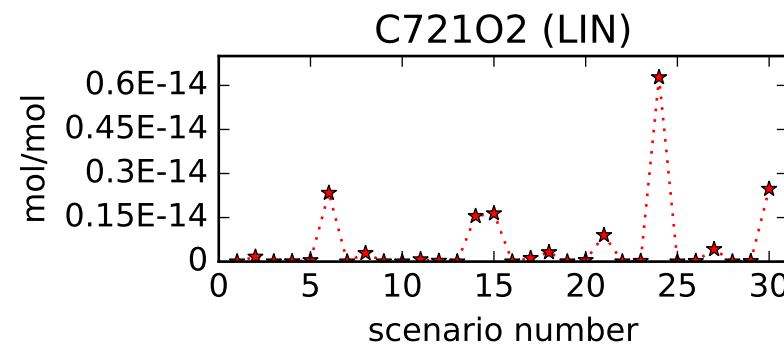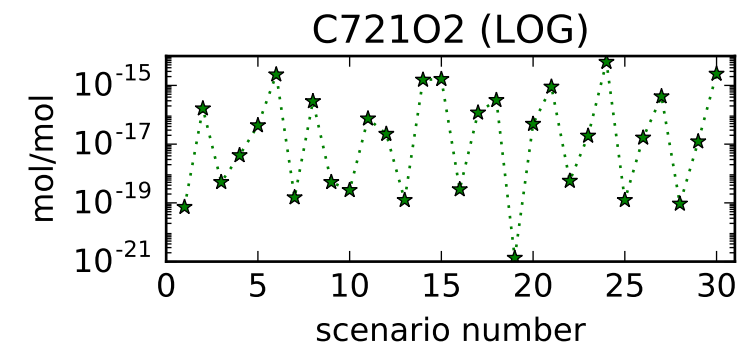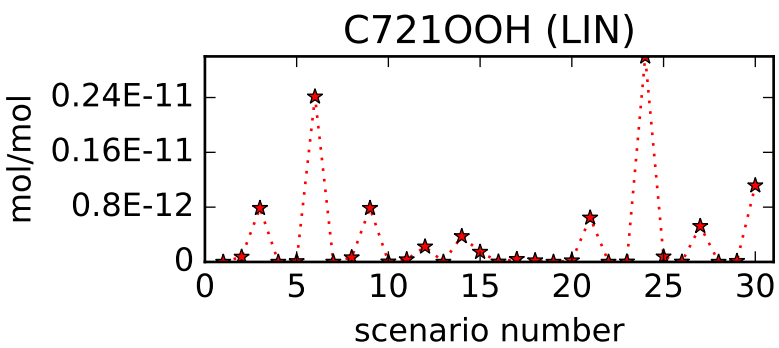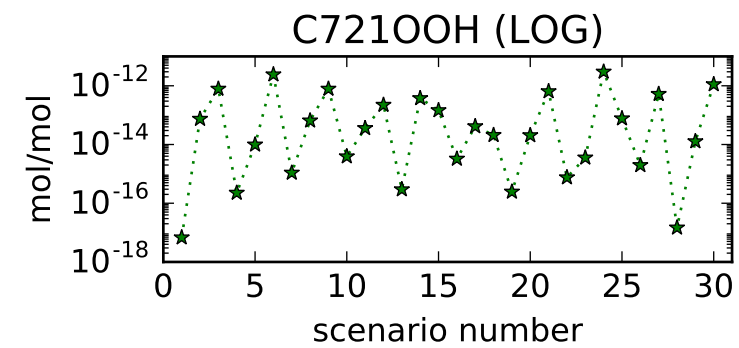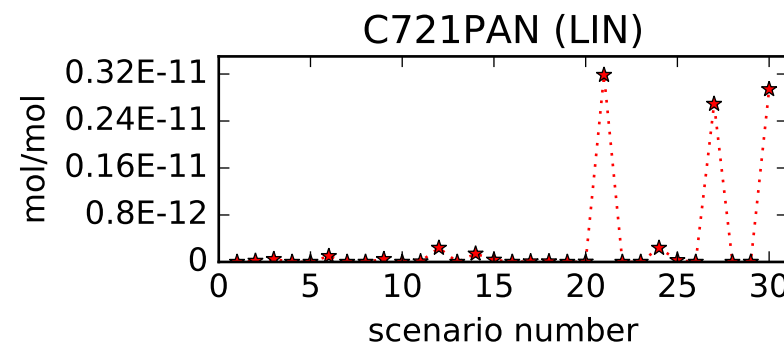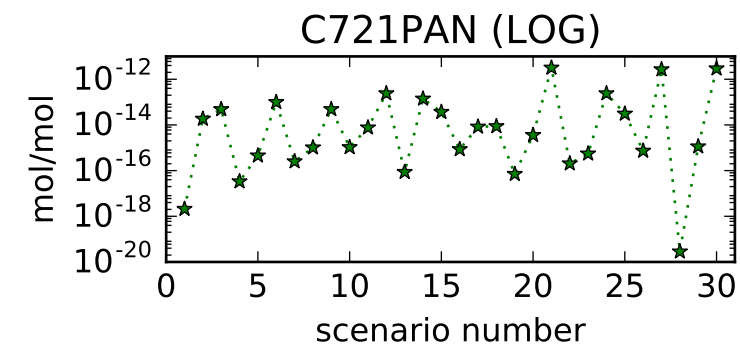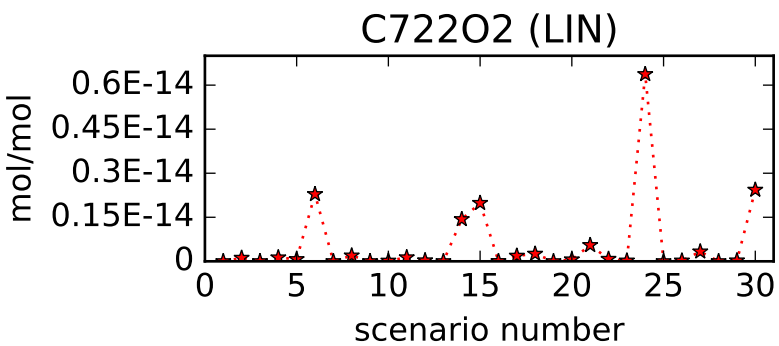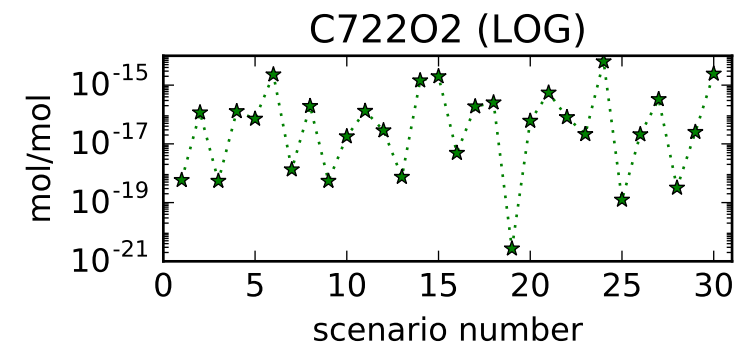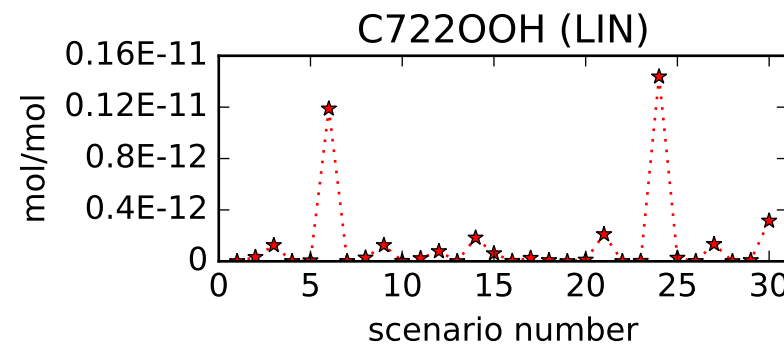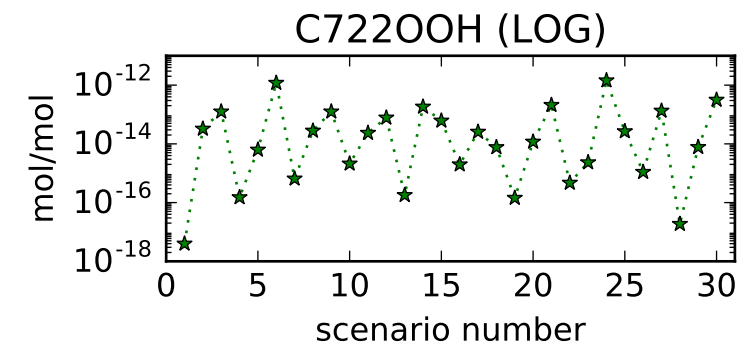

C7CO4DB (LIN)

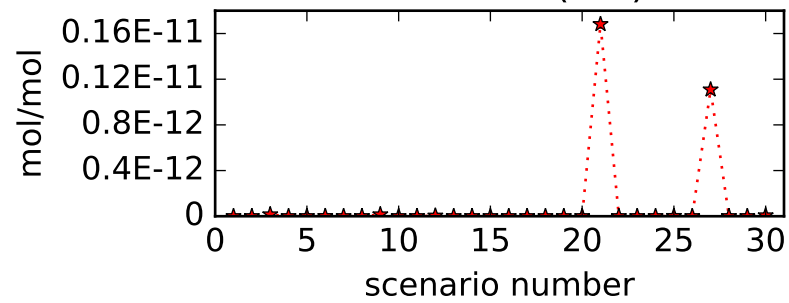

C7CO4DB (LOG)

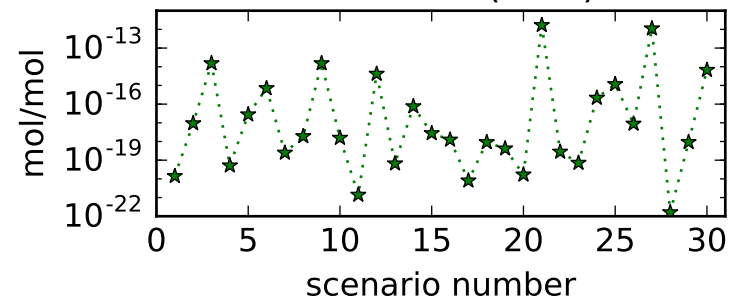

C7PAN3 (LIN)

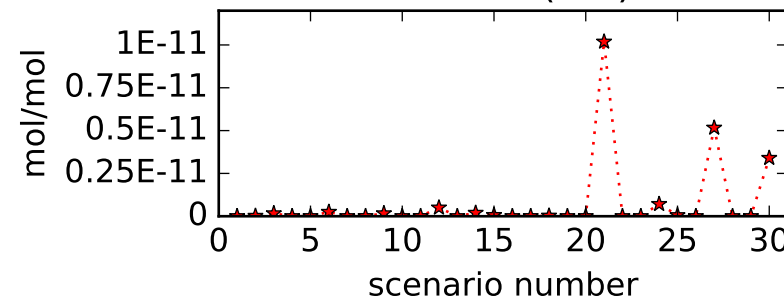

C7PAN3 (LOG)

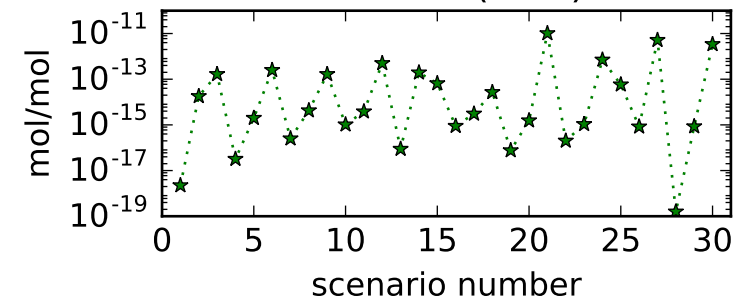

C810NO3 (LIN)

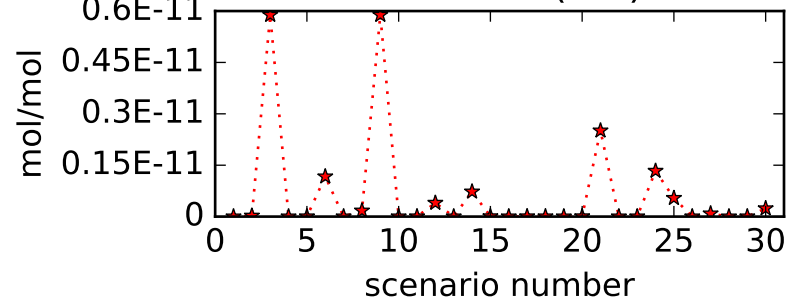

C810NO3 (LOG)

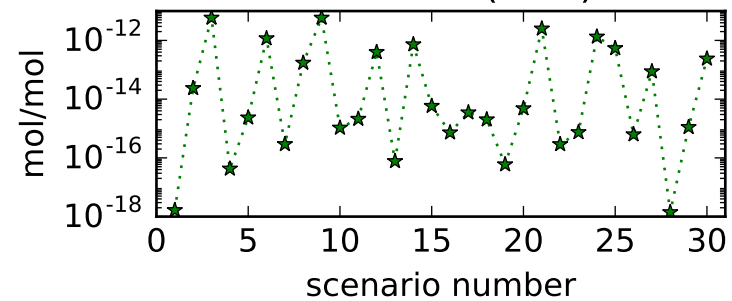

C810O2 (LIN)

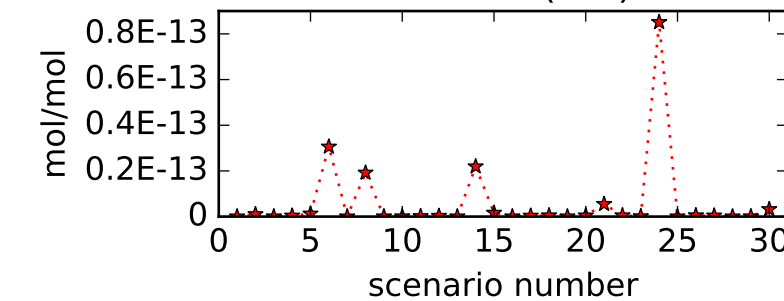

C810O2 (LOG)

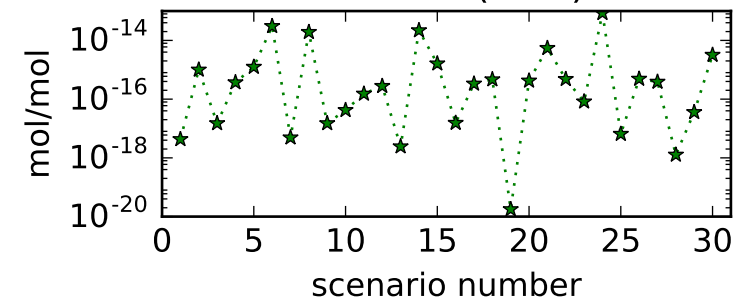

C810OOH (LIN)

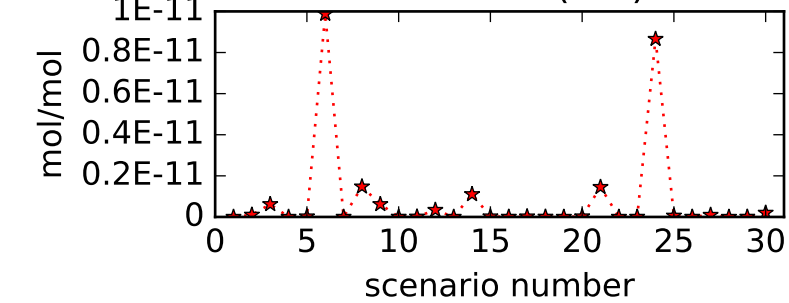

C810OOH (LOG)

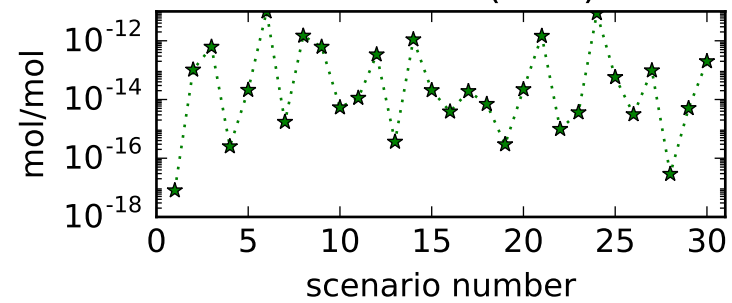

C811CO3 (LIN)

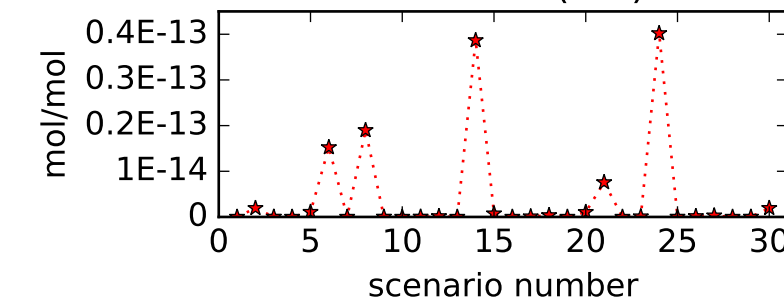

C811CO3 (LOG)

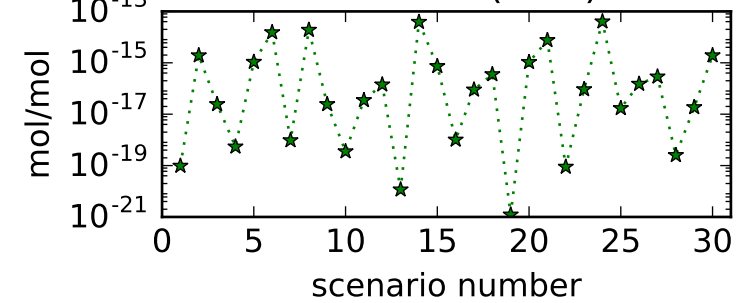

C811CO3H (LIN)

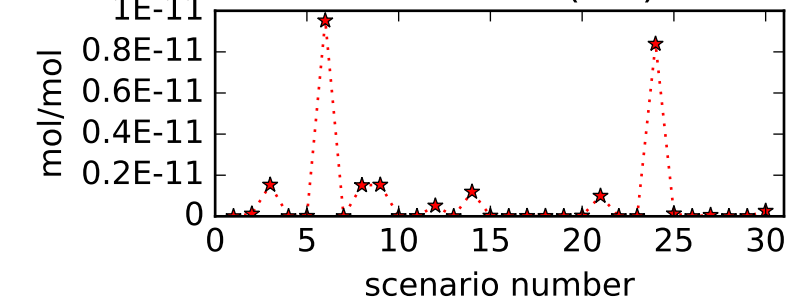

C811CO3H (LOG)

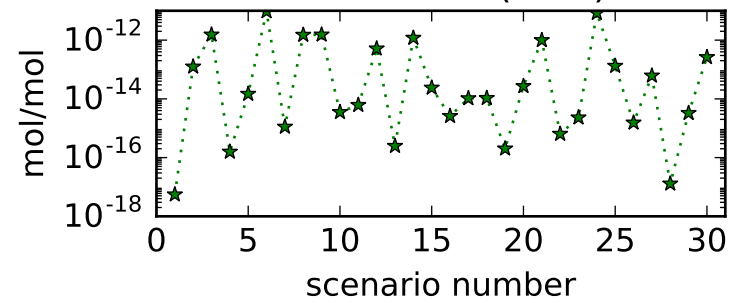

C811O2 (LIN)

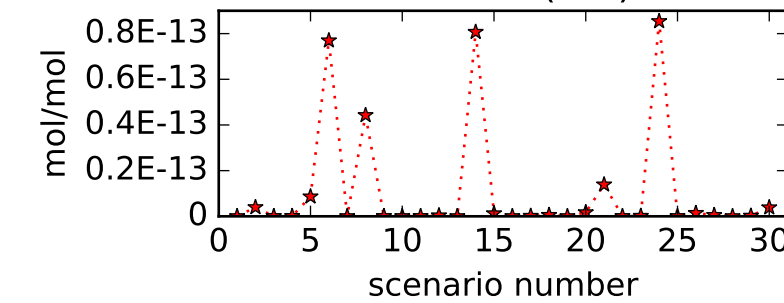

C811O2 (LOG)

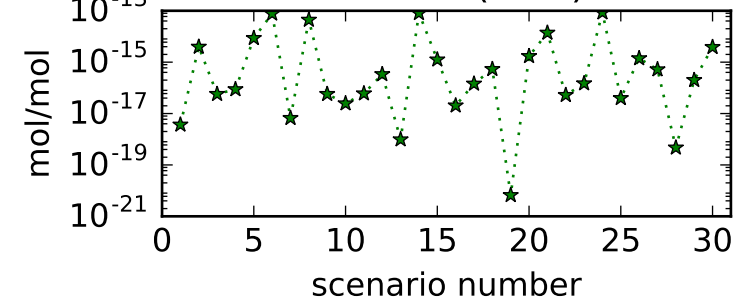

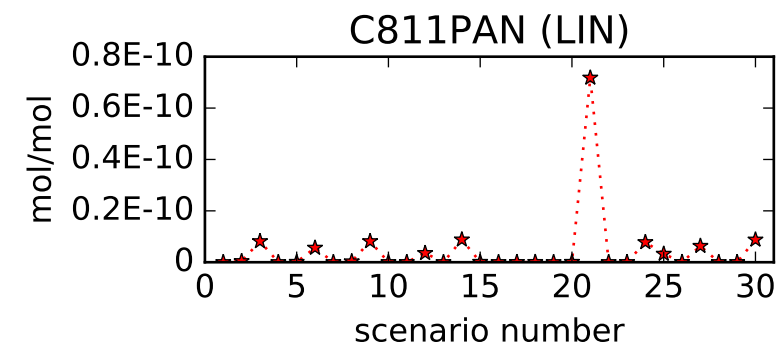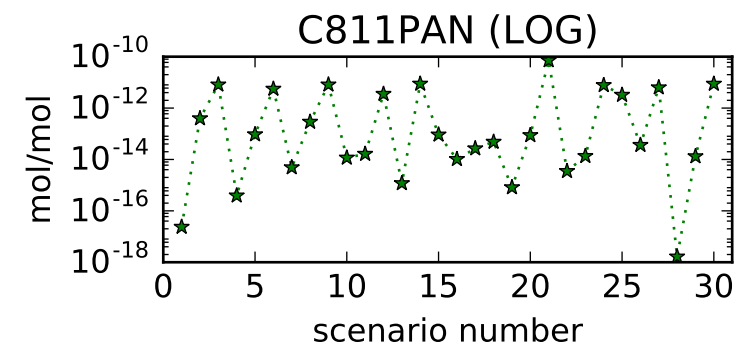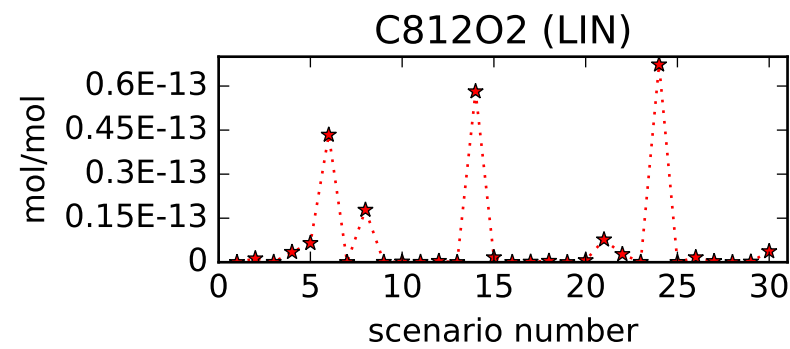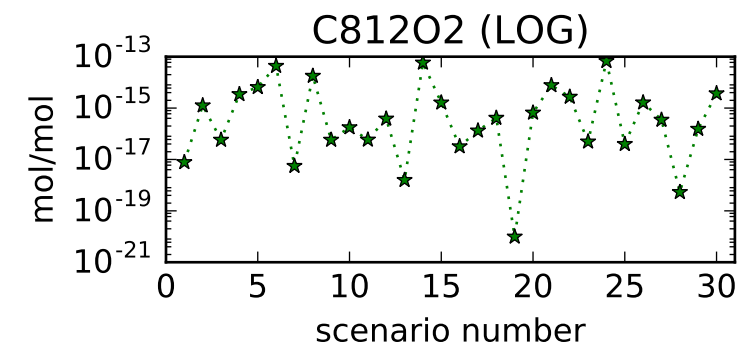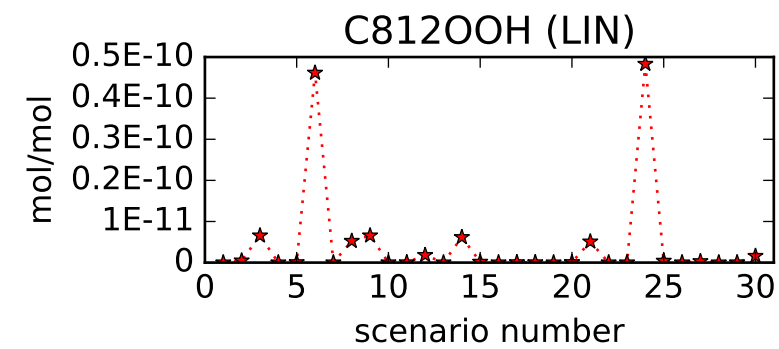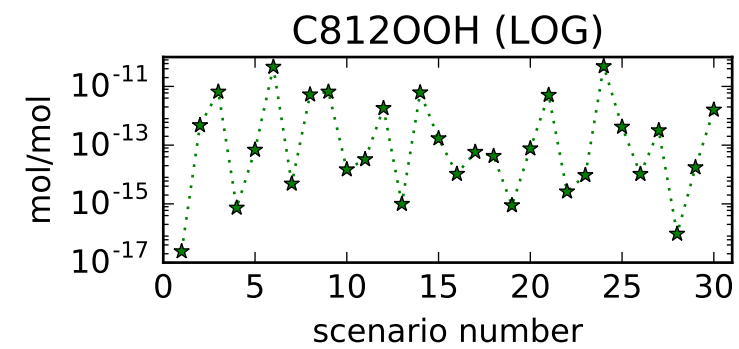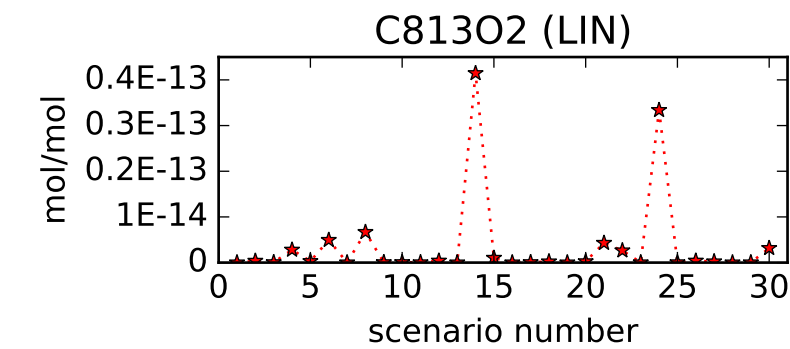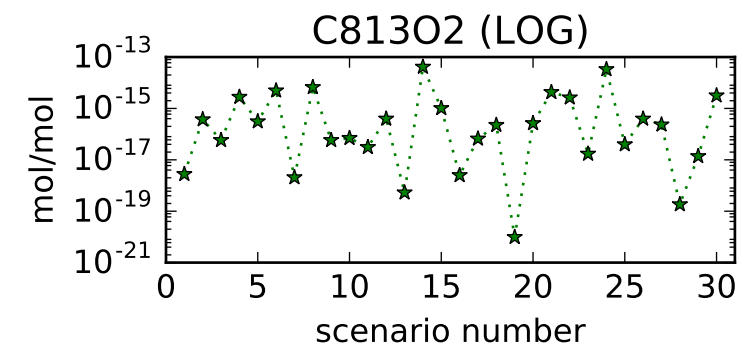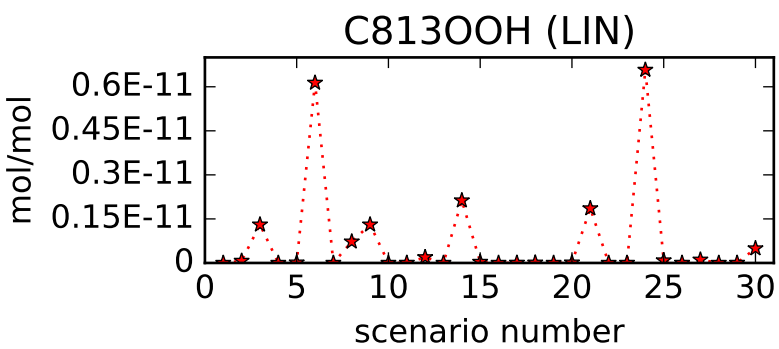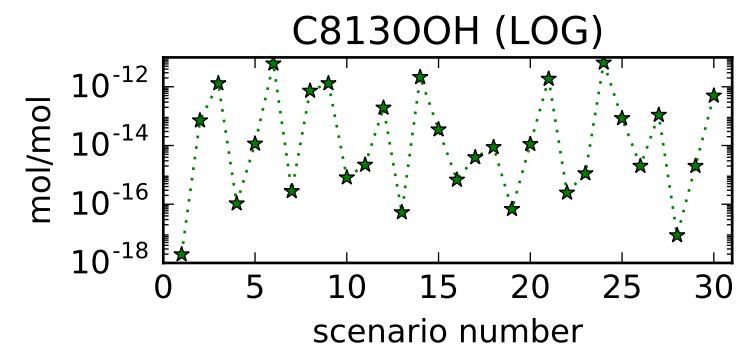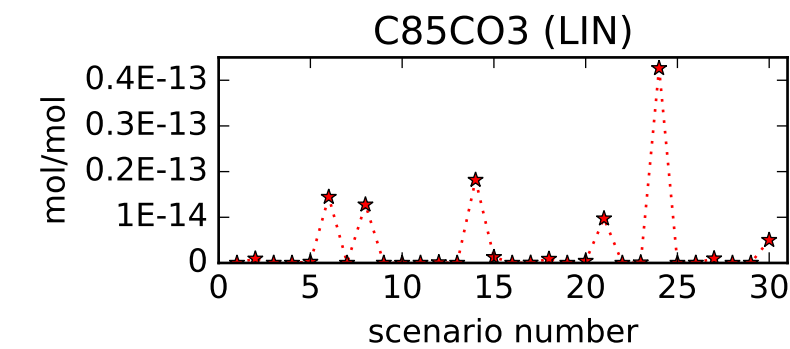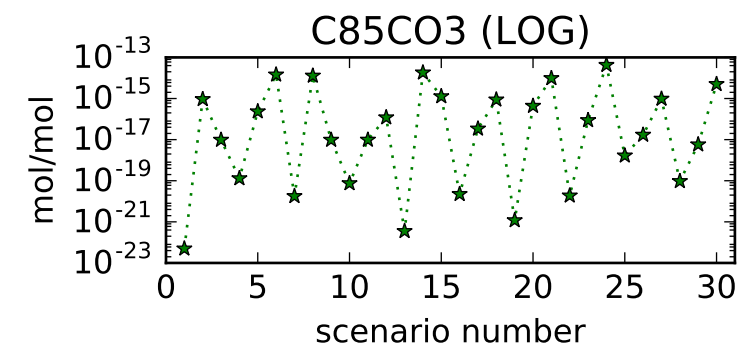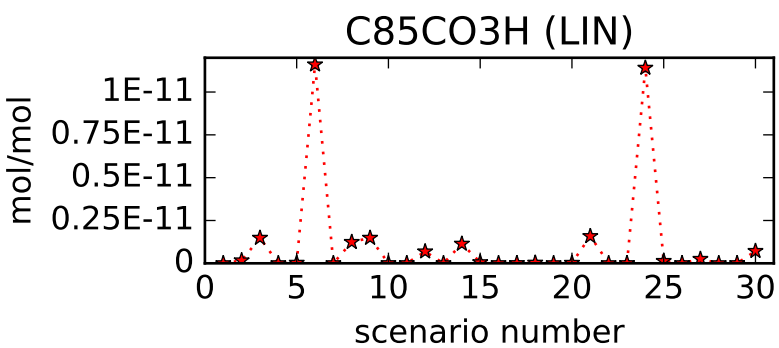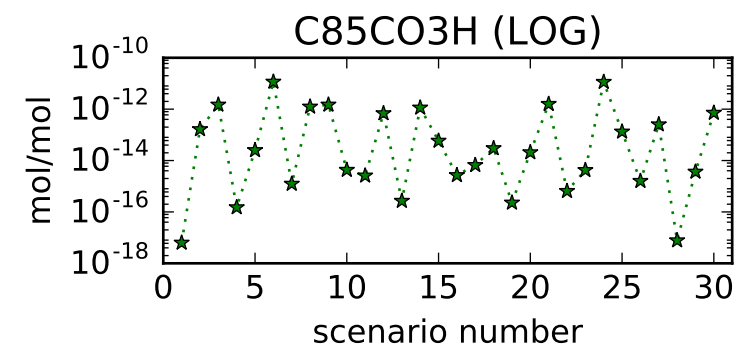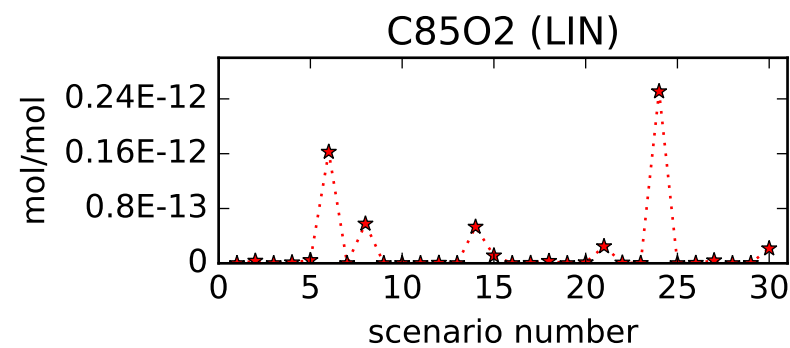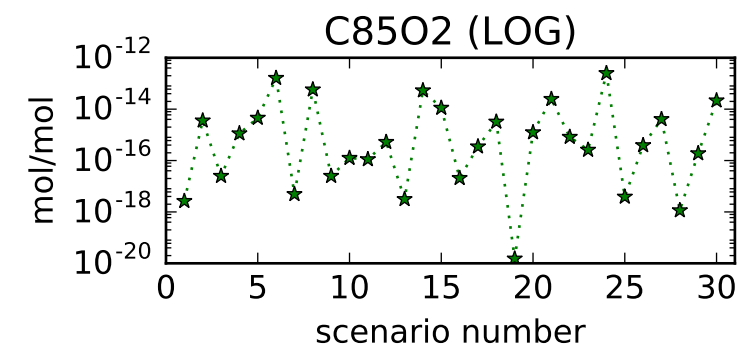

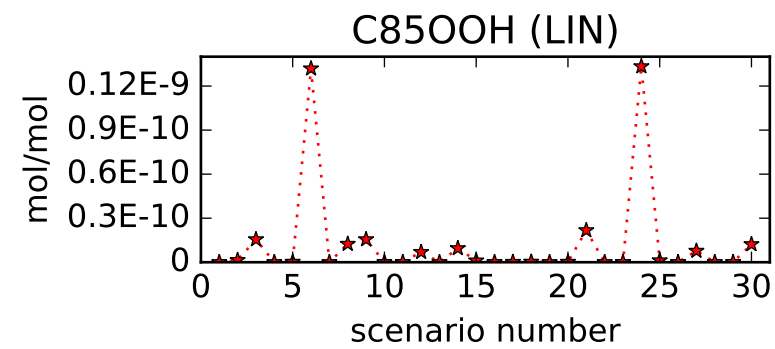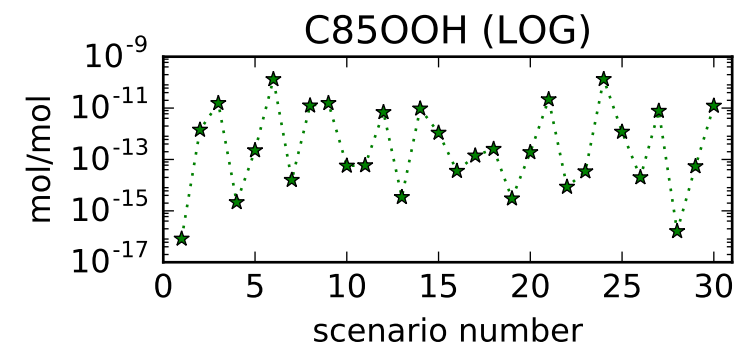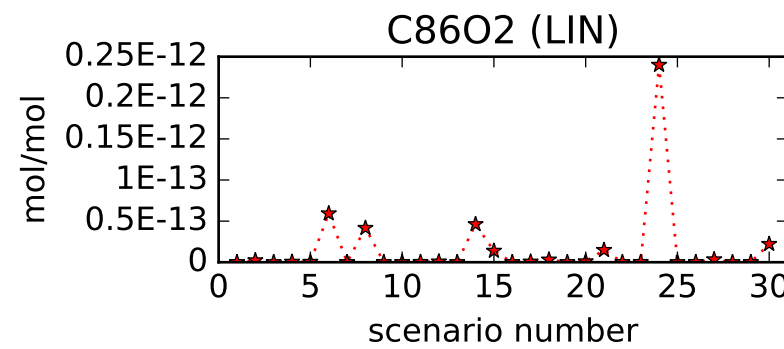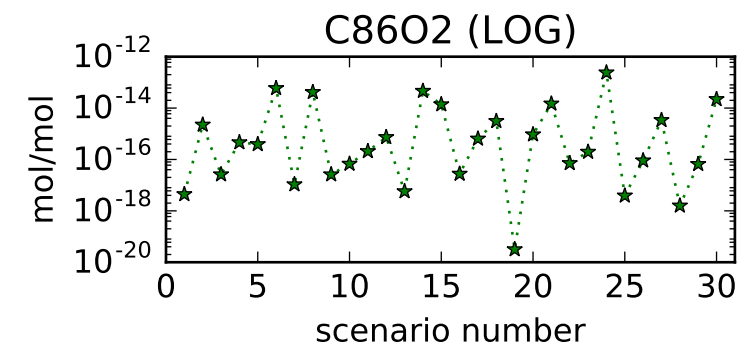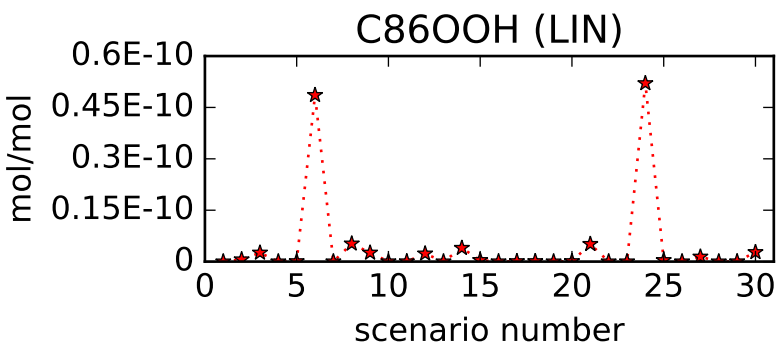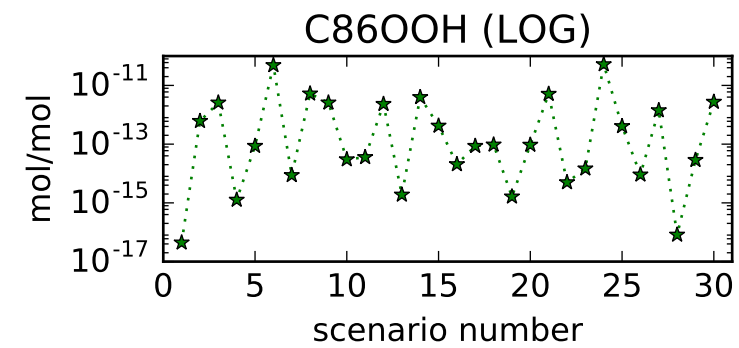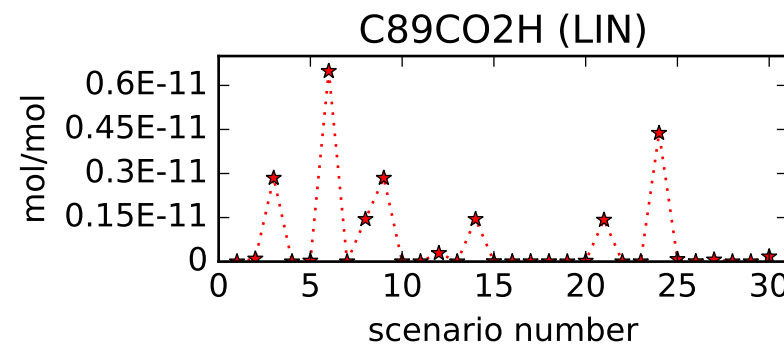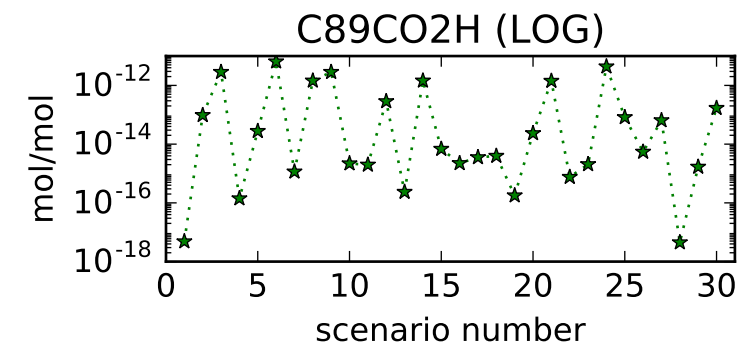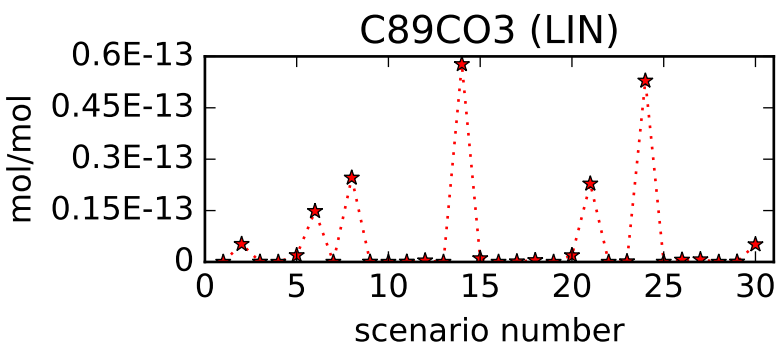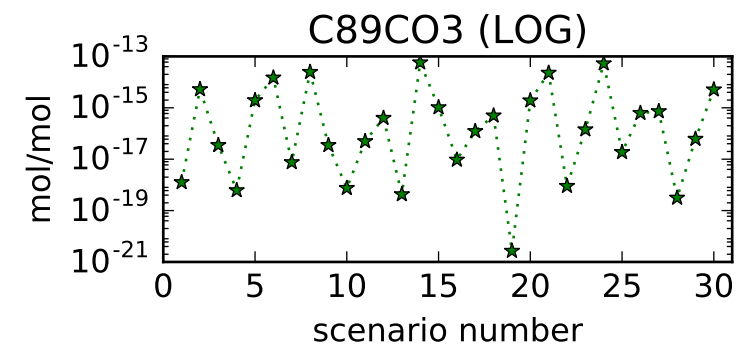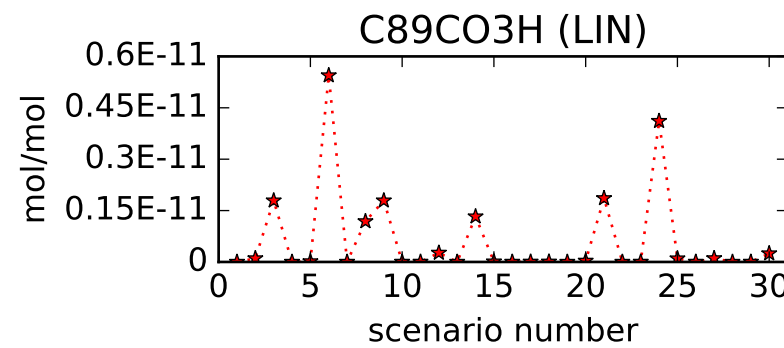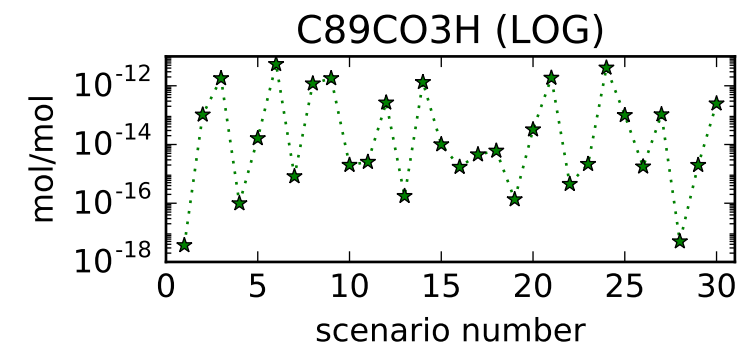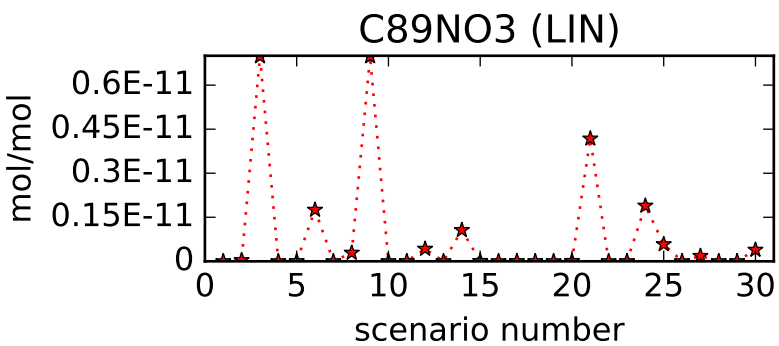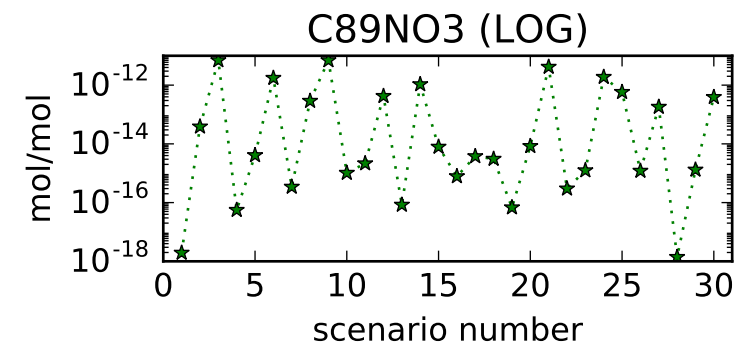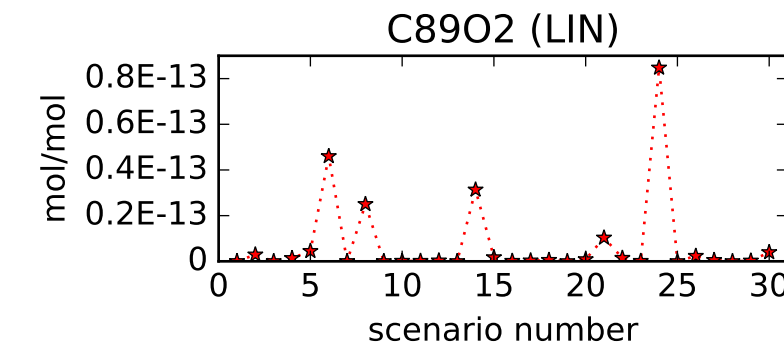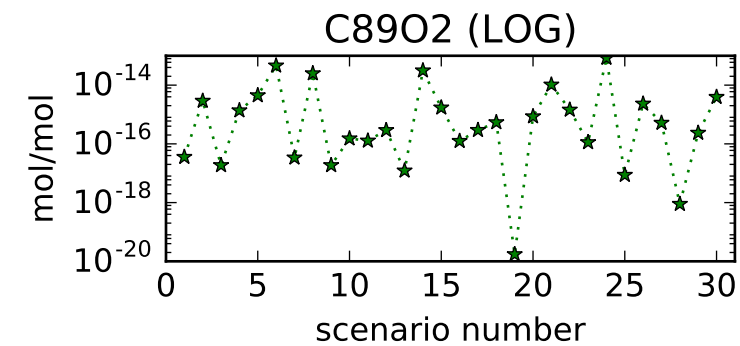



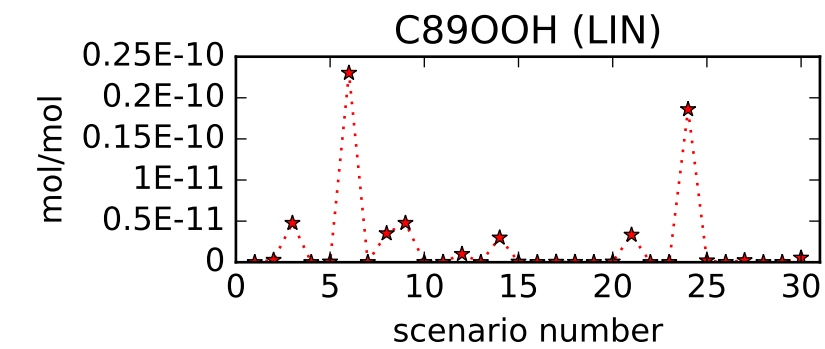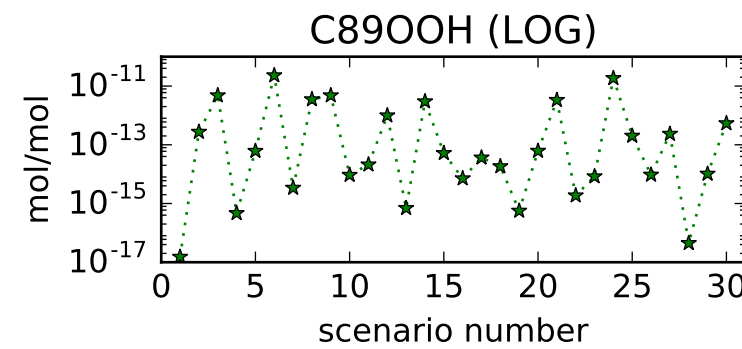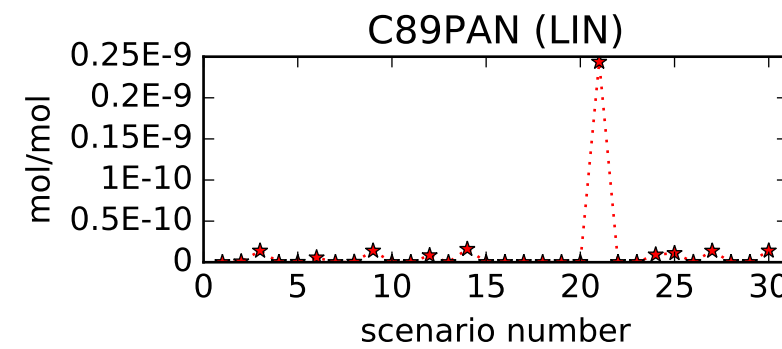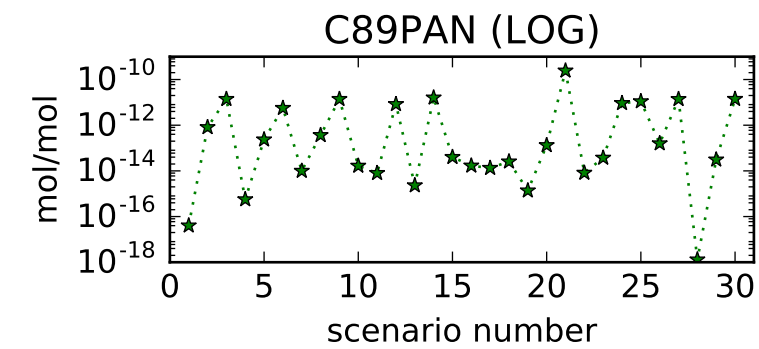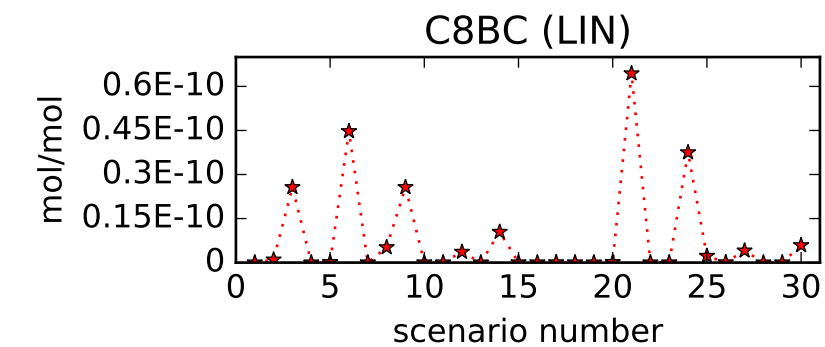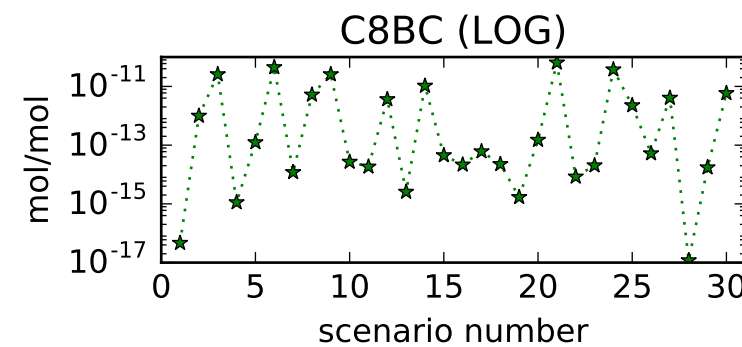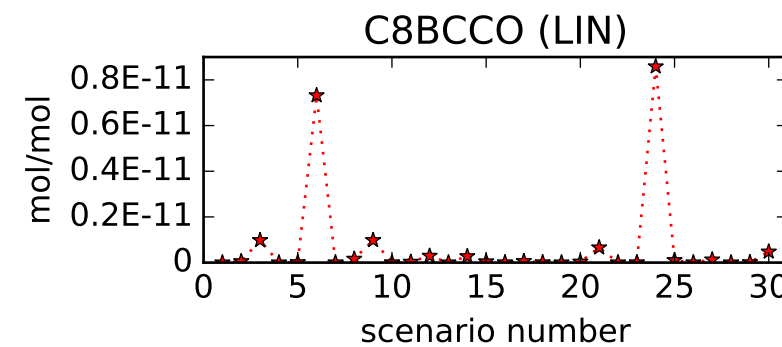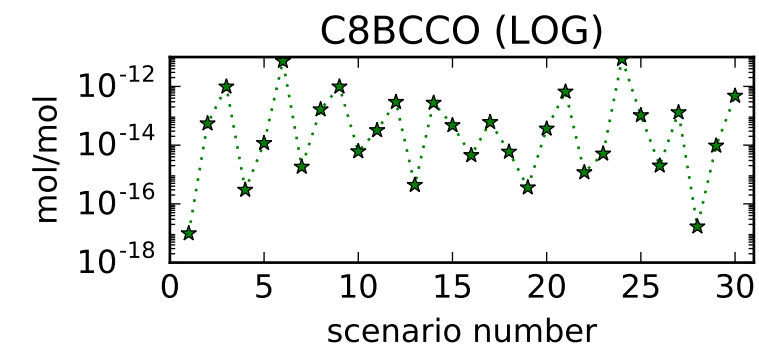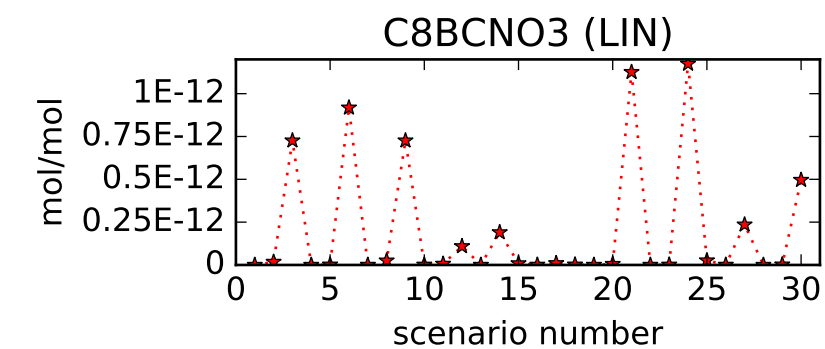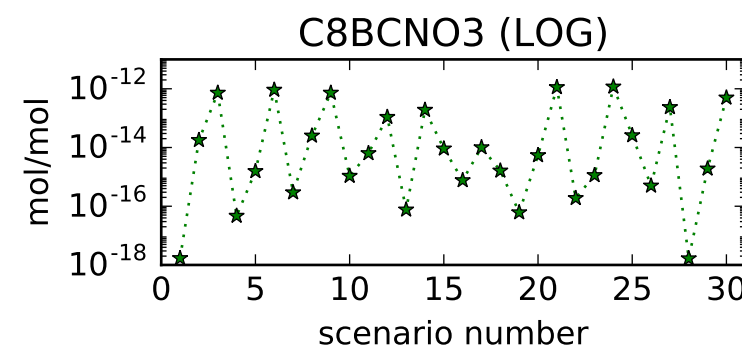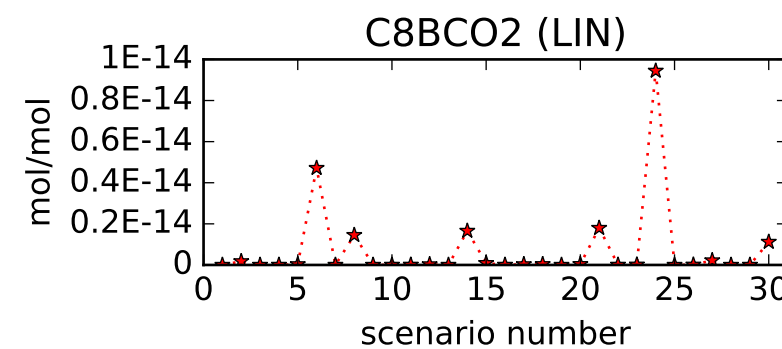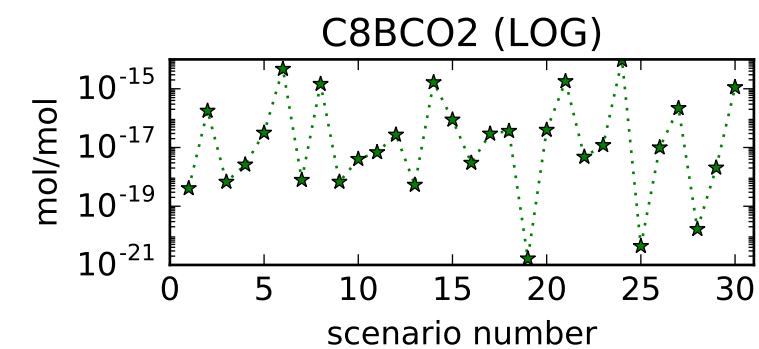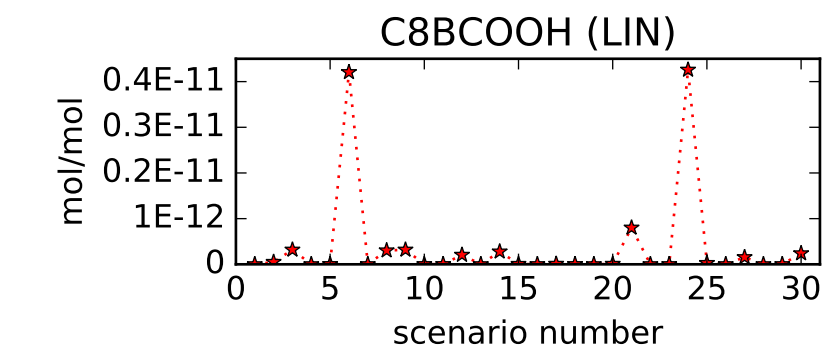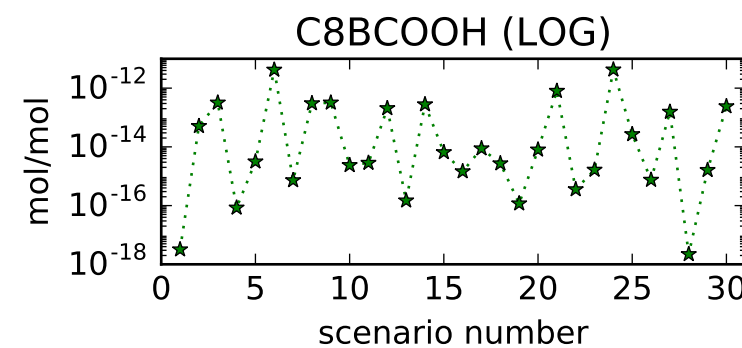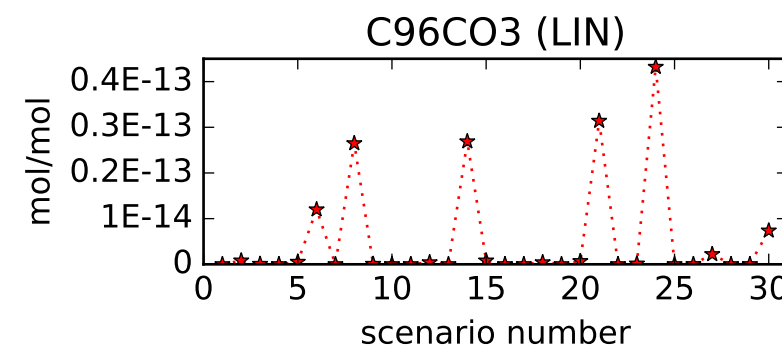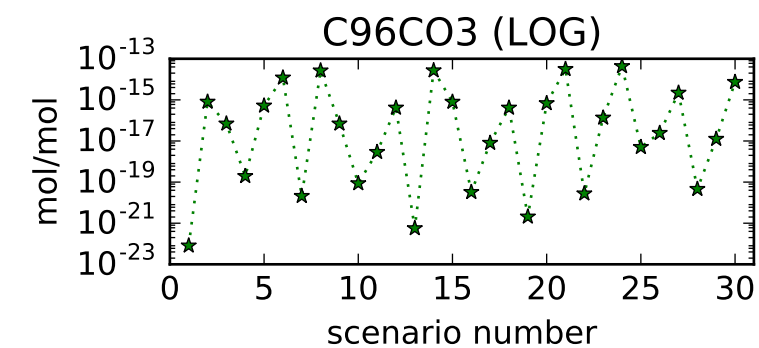

C96NO3 (LIN)

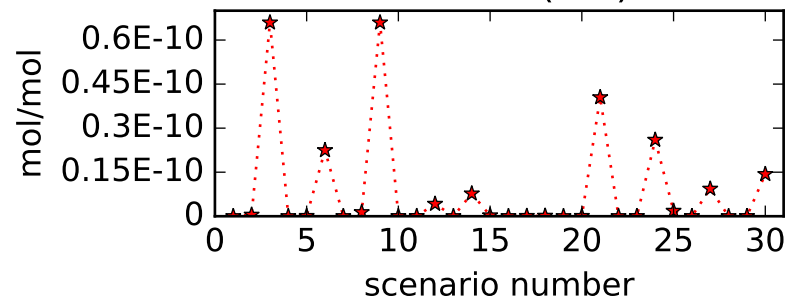

C96NO3 (LOG)

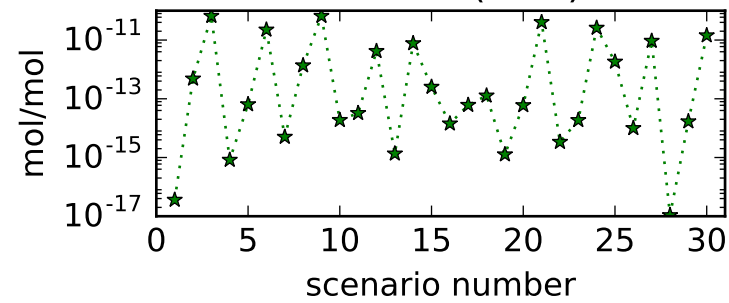

C96O2 (LIN)

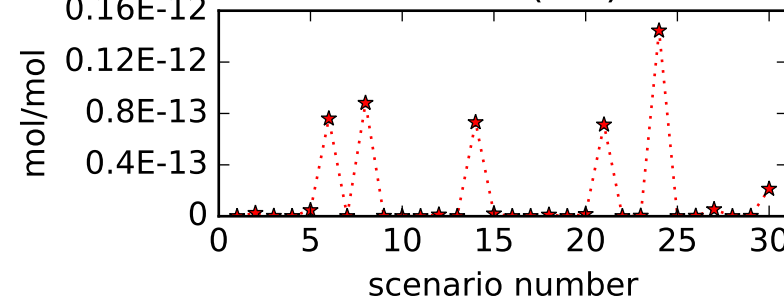

C96O2 (LOG)

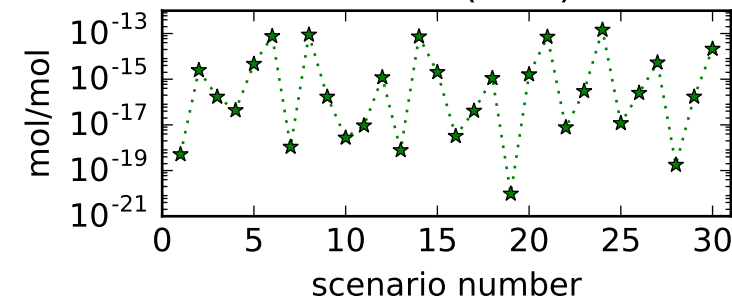

C96OOH (LIN)

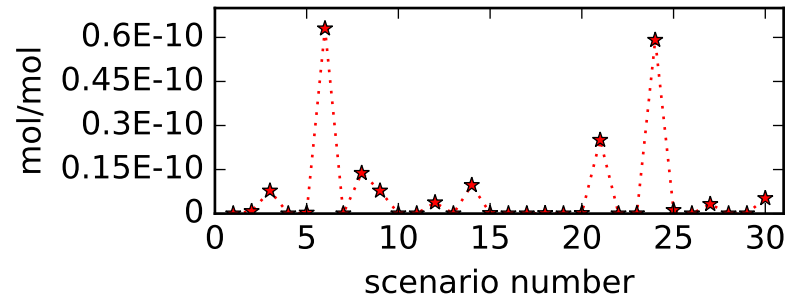

C96OOH (LOG)

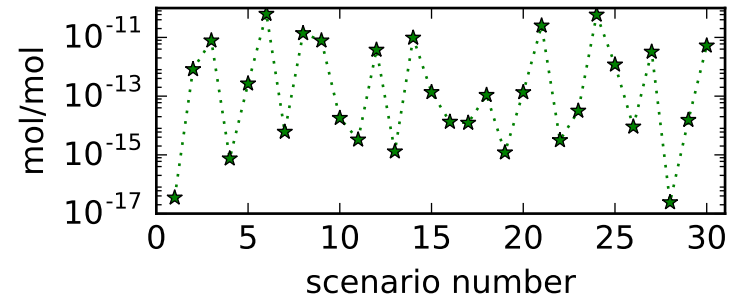

C97O2 (LIN)

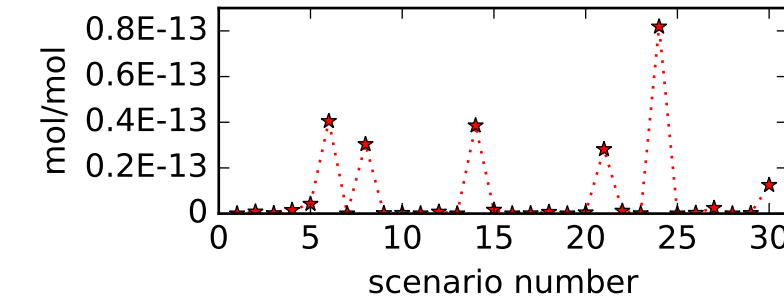

C97O2 (LOG)

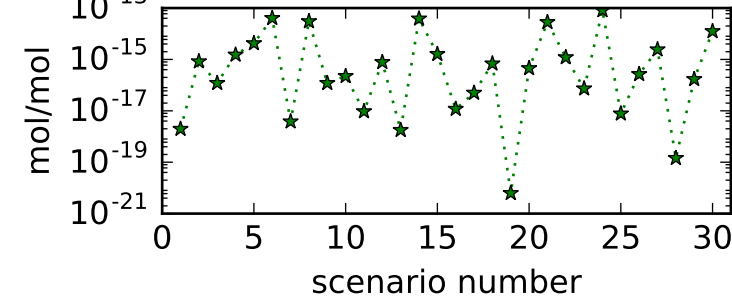

C97OOH (LIN)

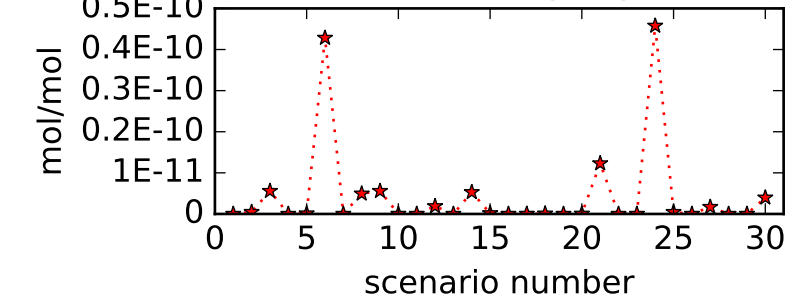

C97OOH (LOG)

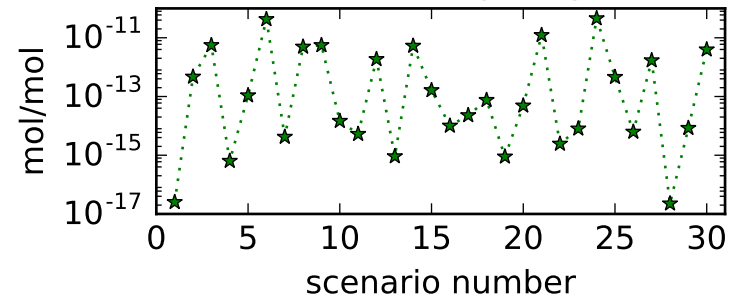

C98O2 (LIN)

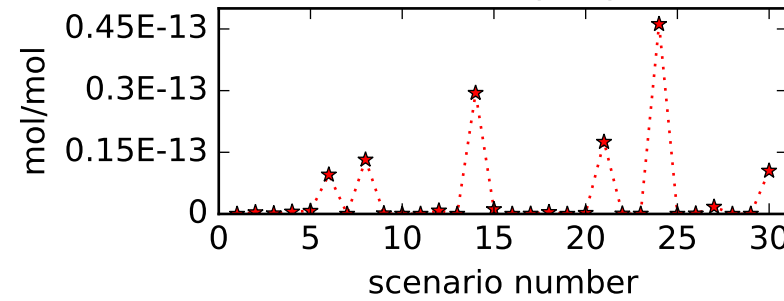

C98O2 (LOG)

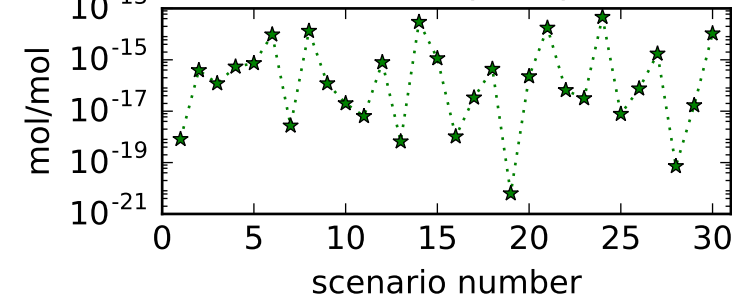

C98OOH (LIN)

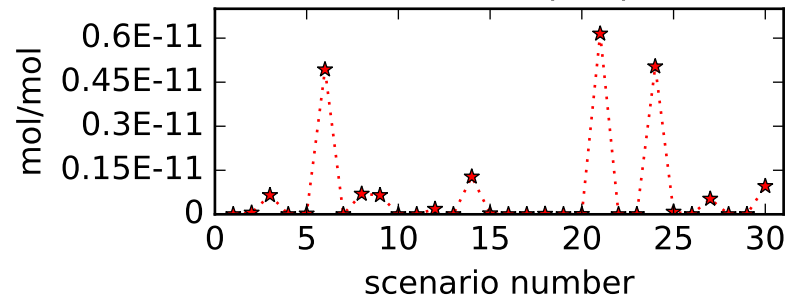

C98OOH (LOG)

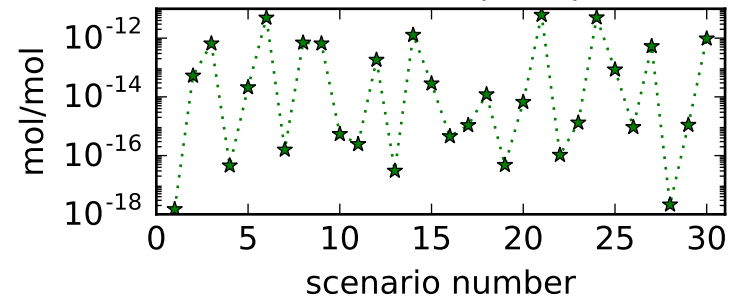

C9PAN2 (LIN)

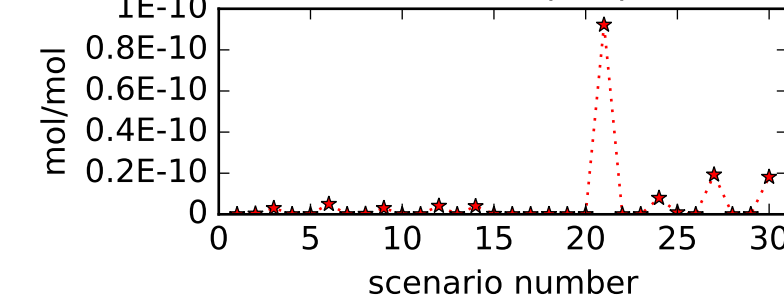

C9PAN2 (LOG)

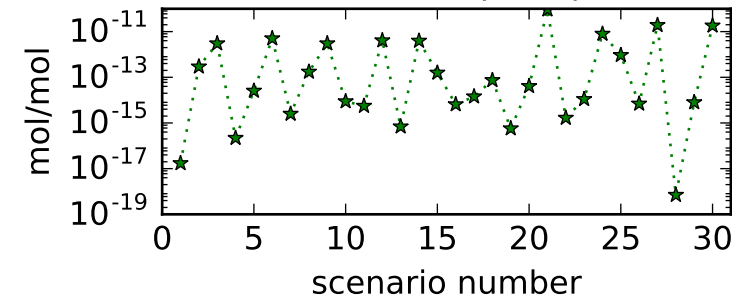

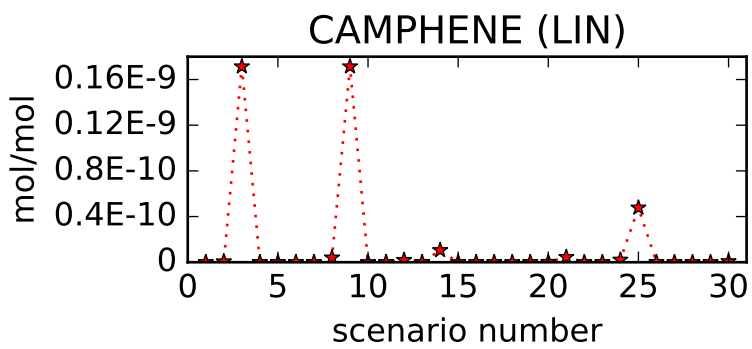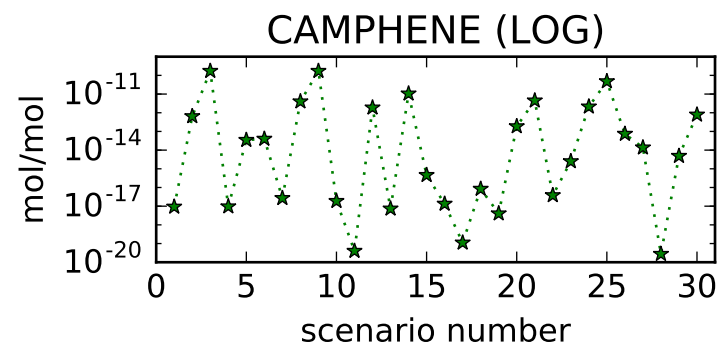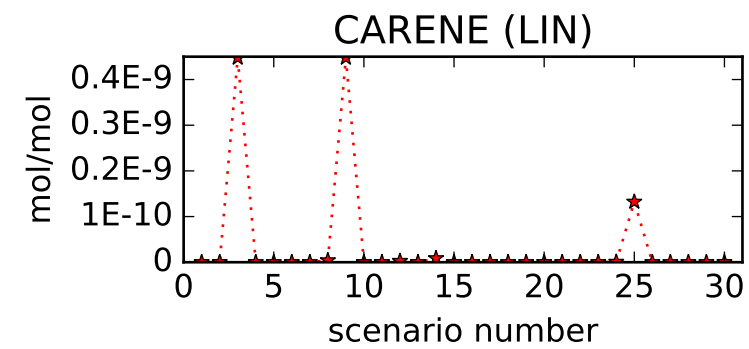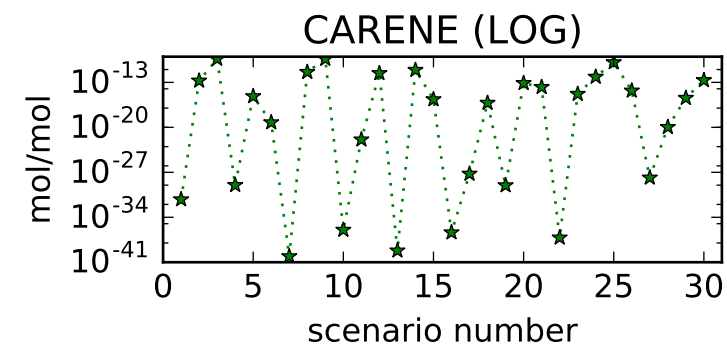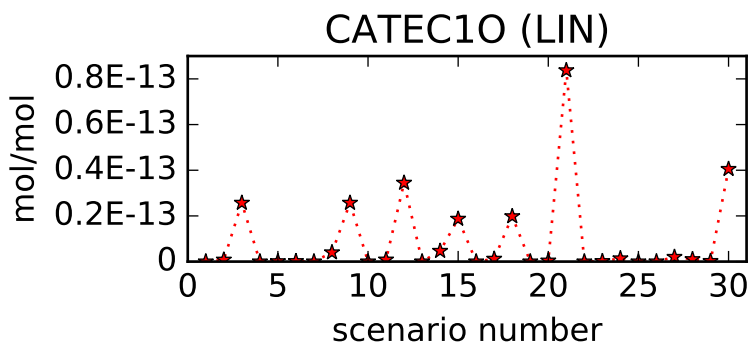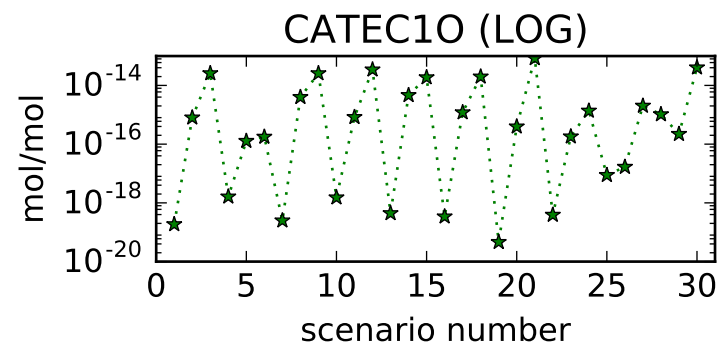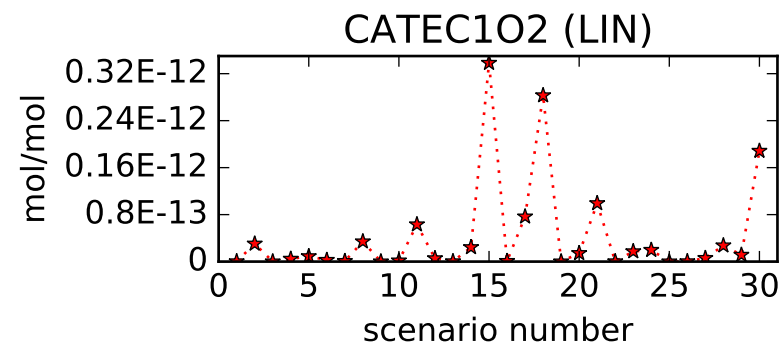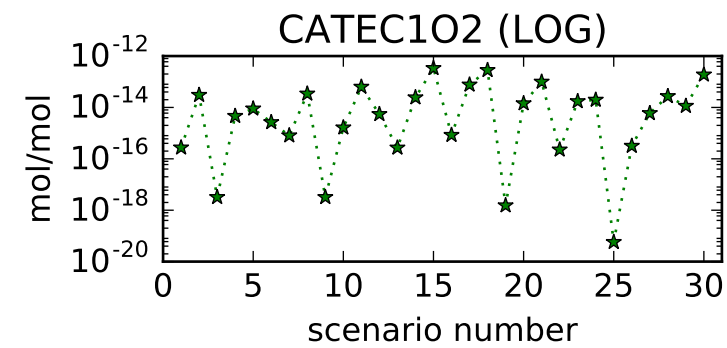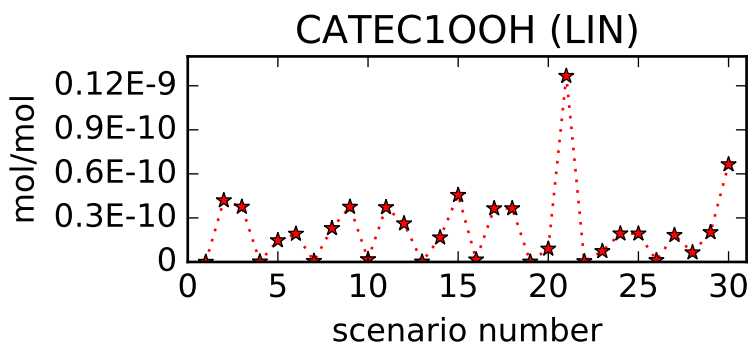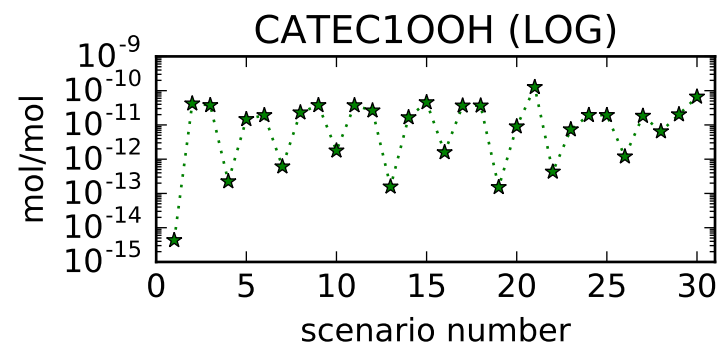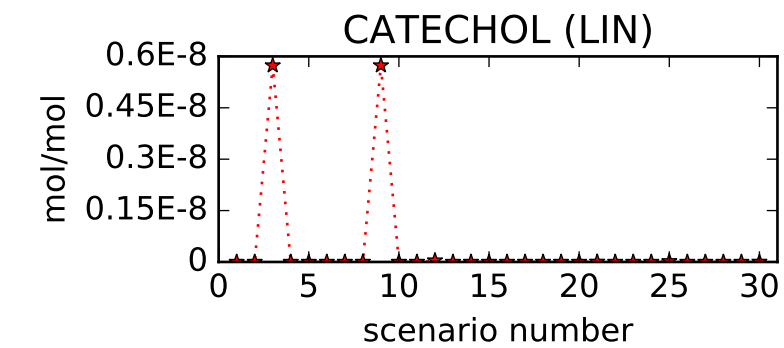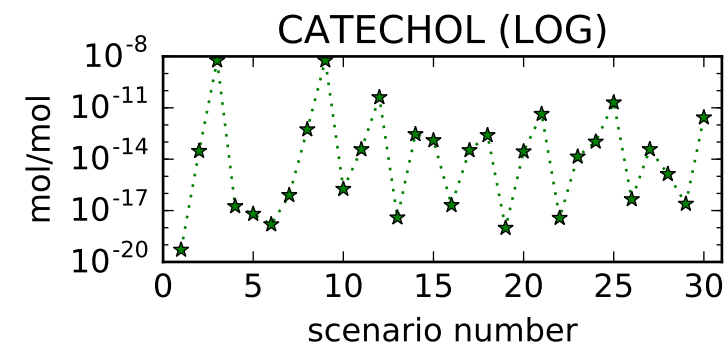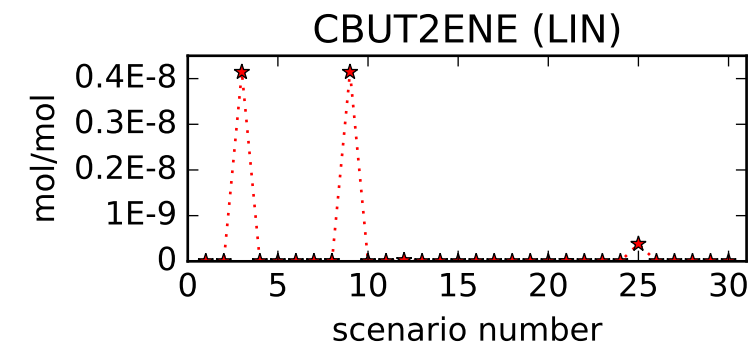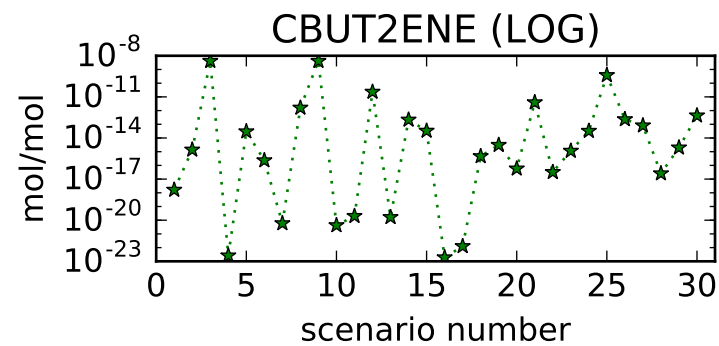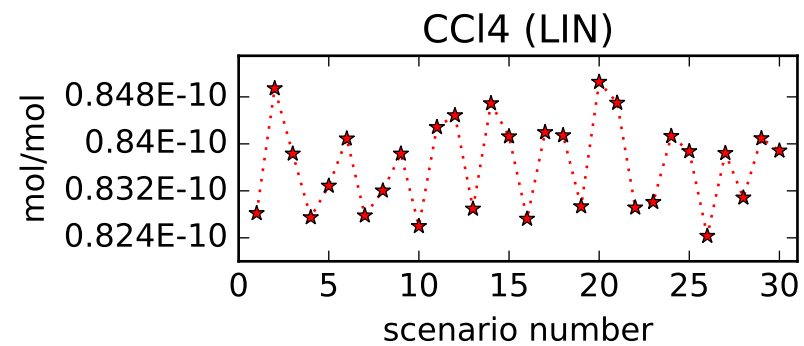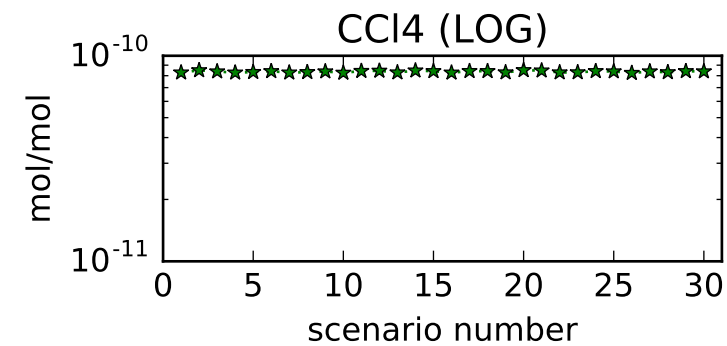

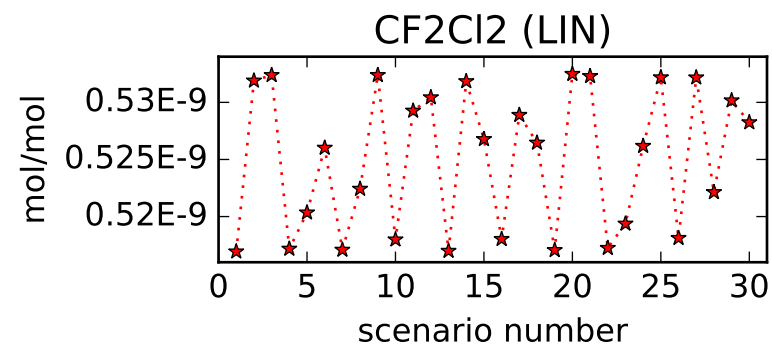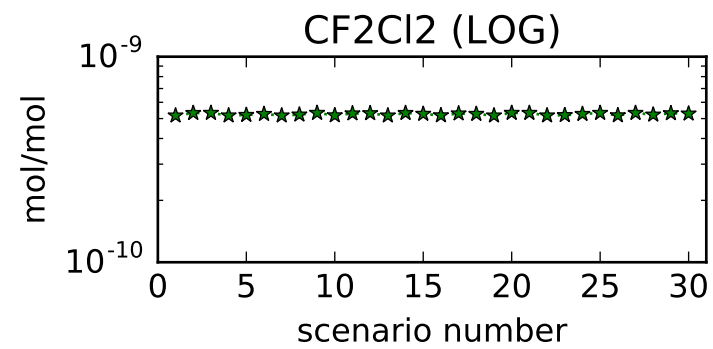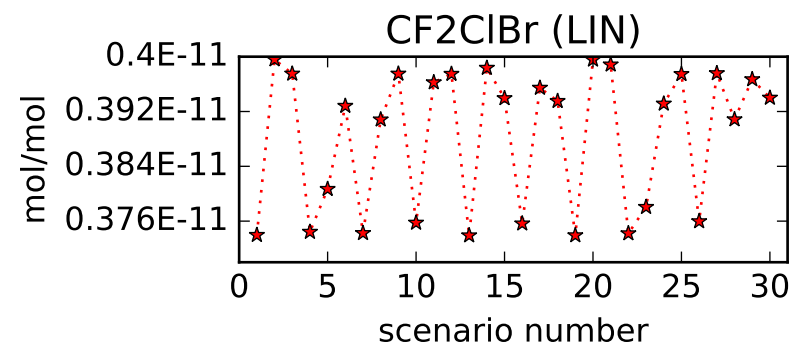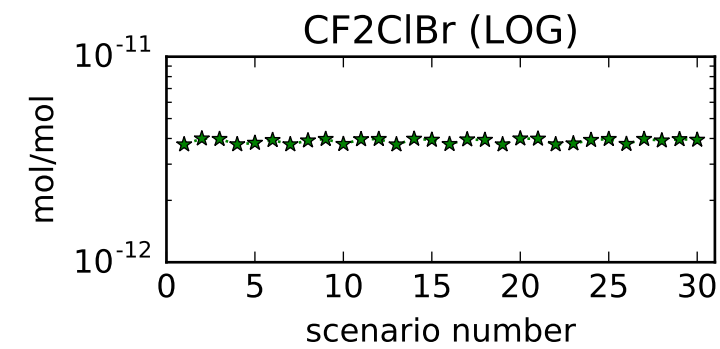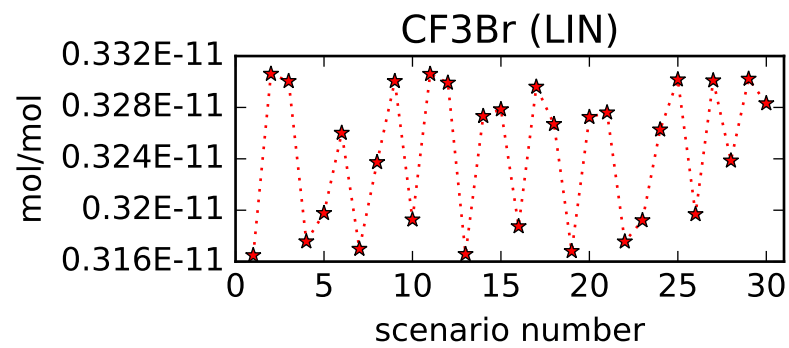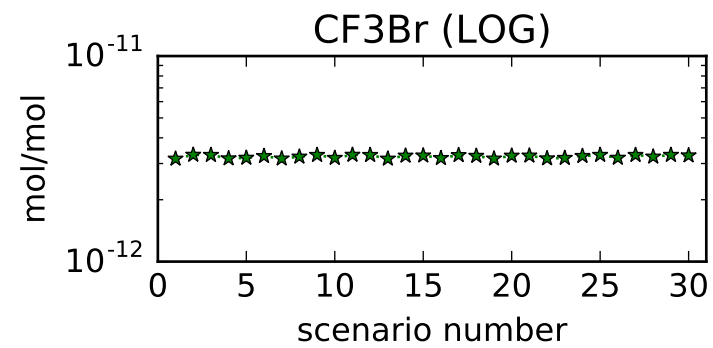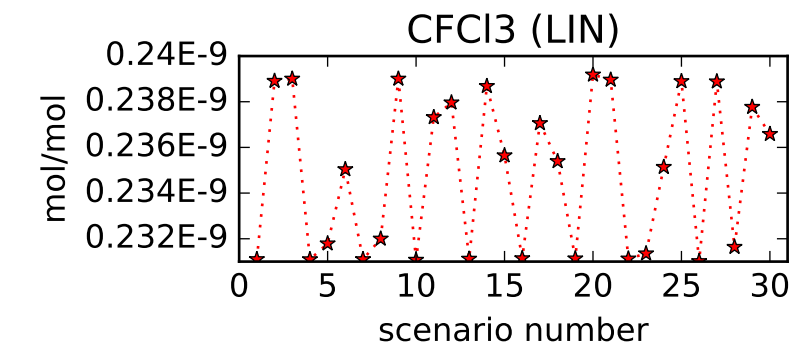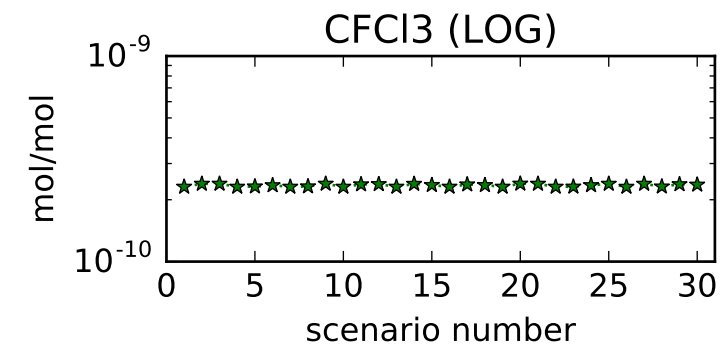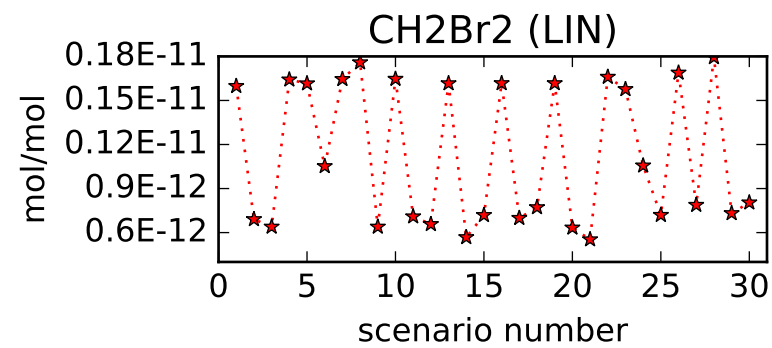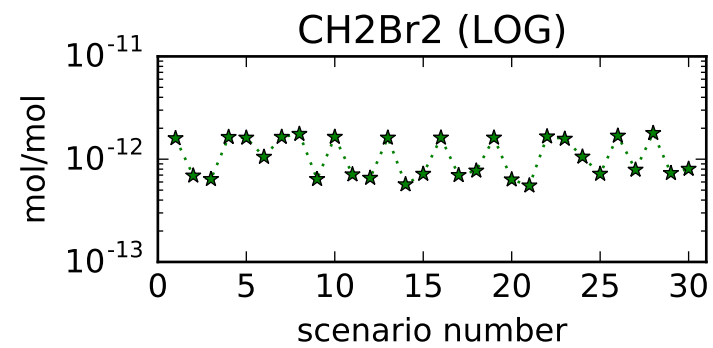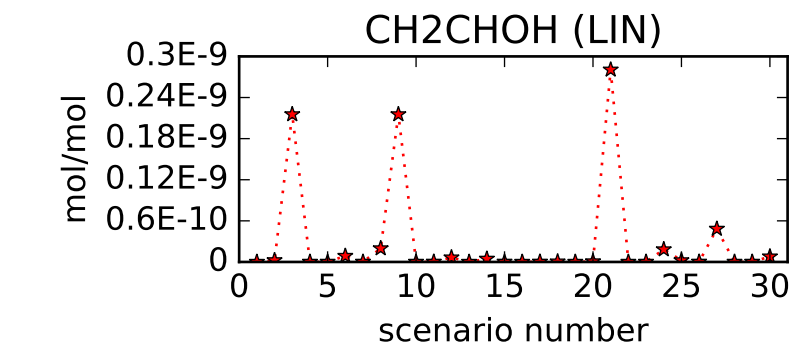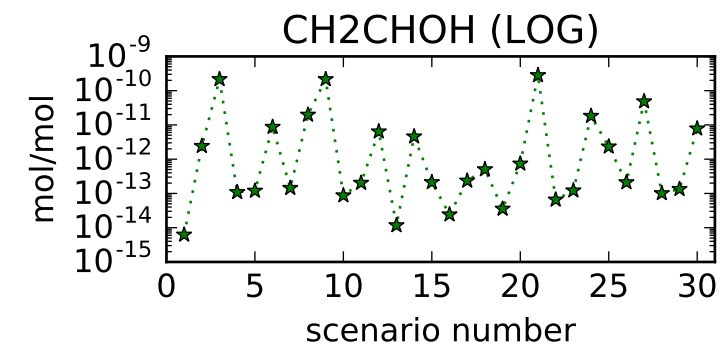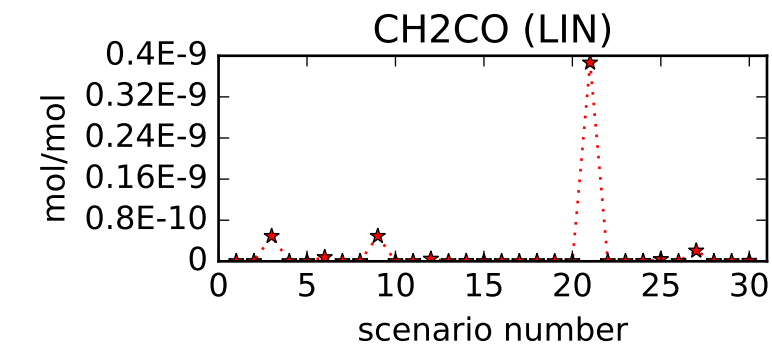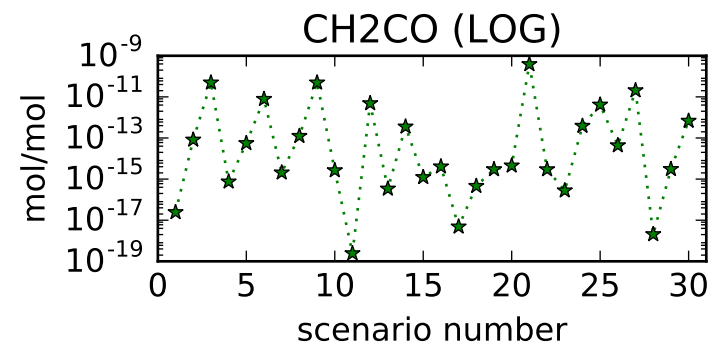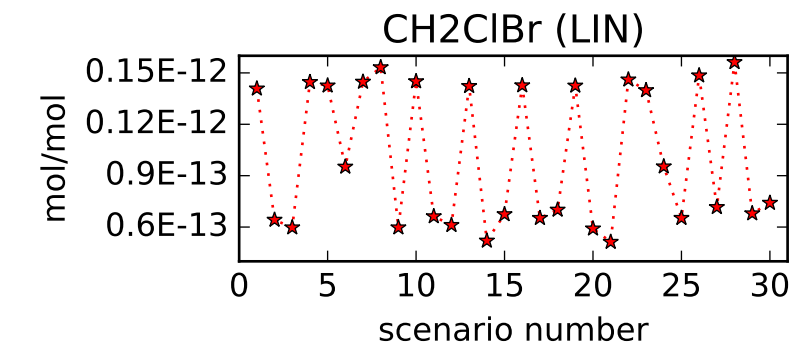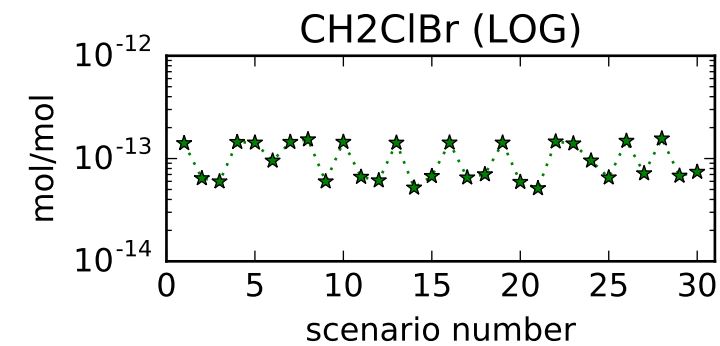

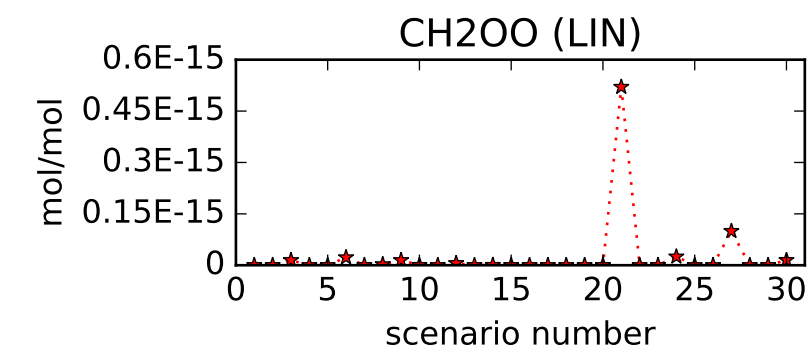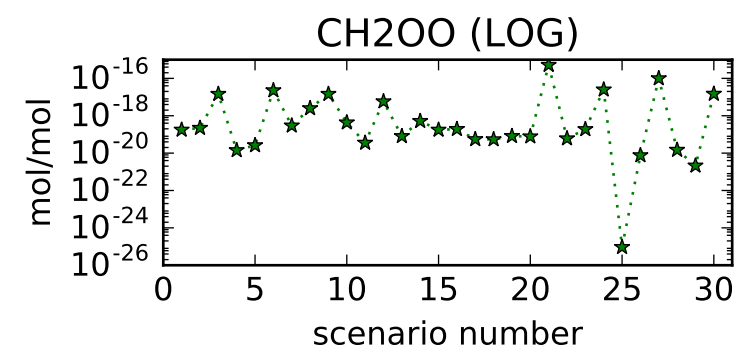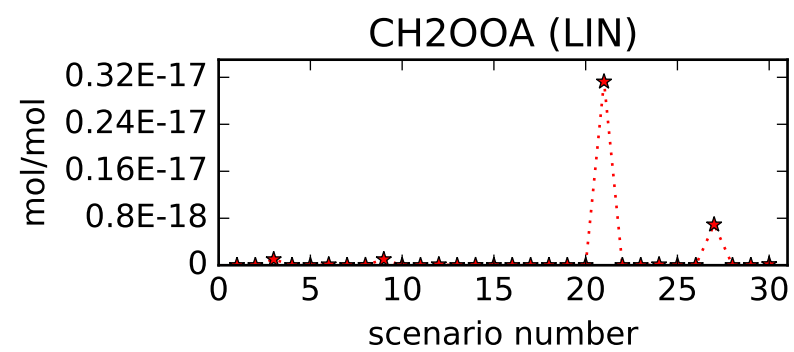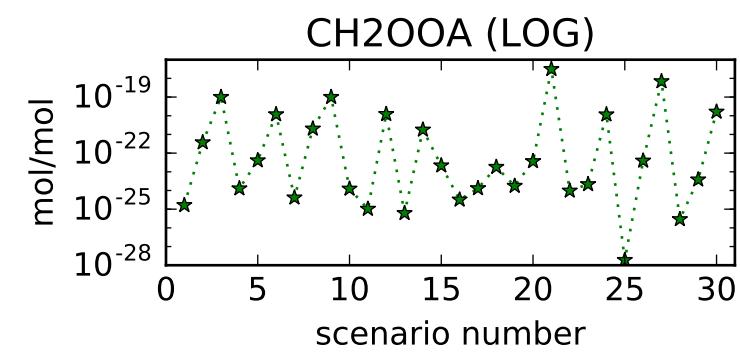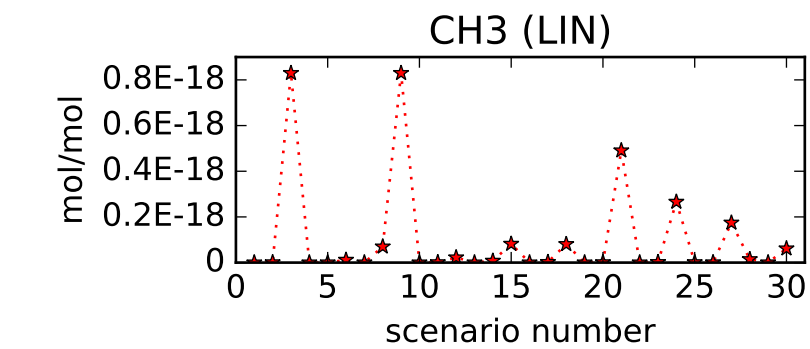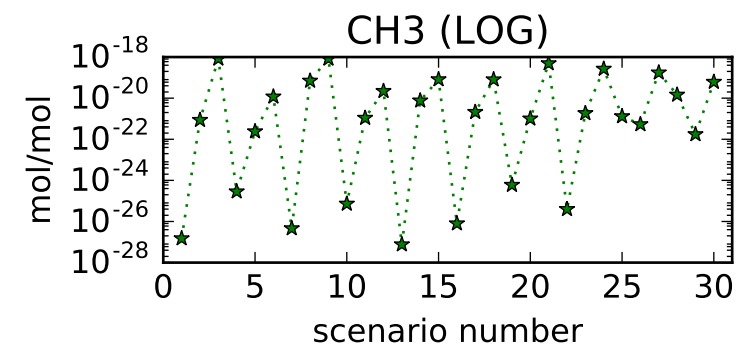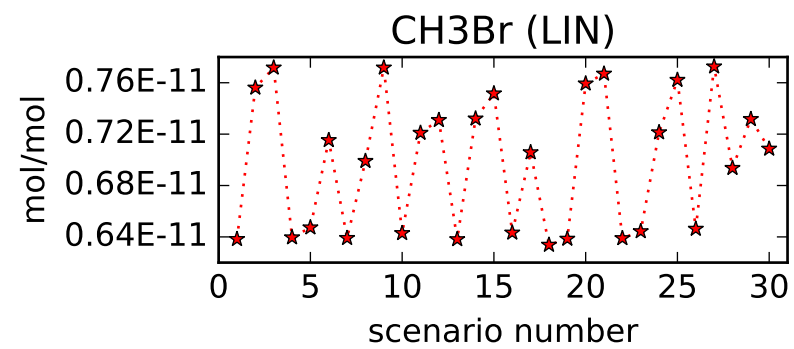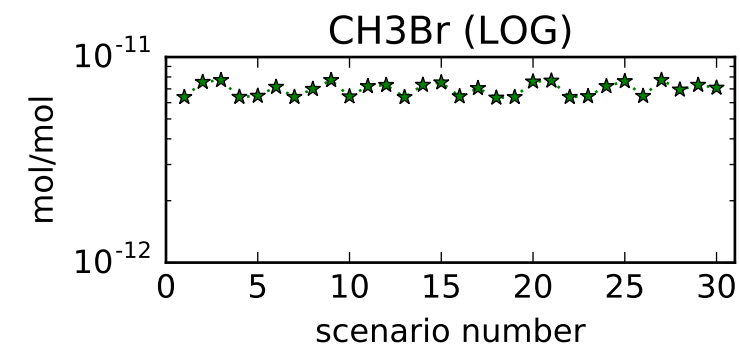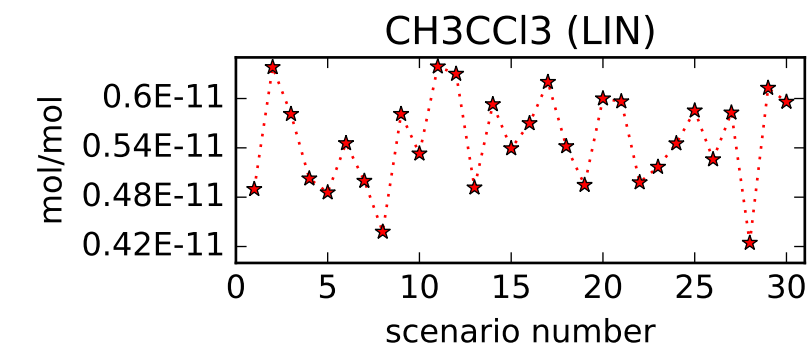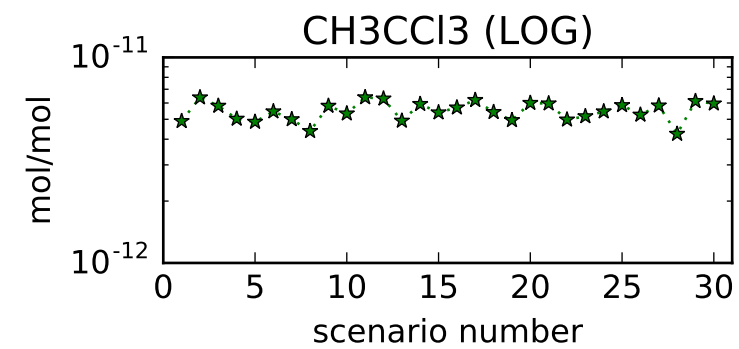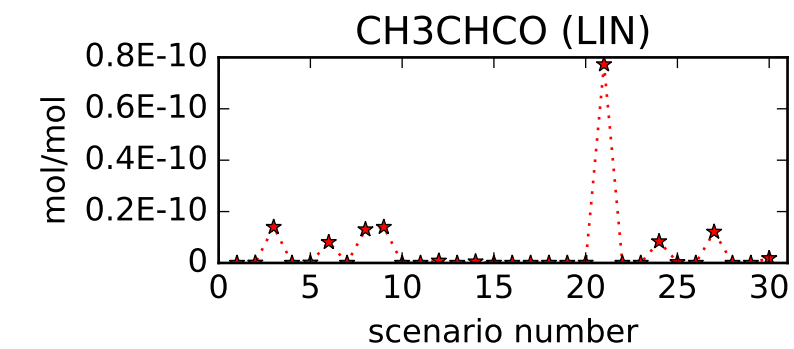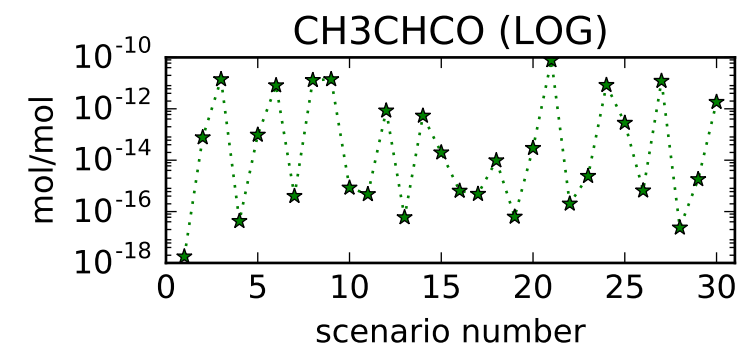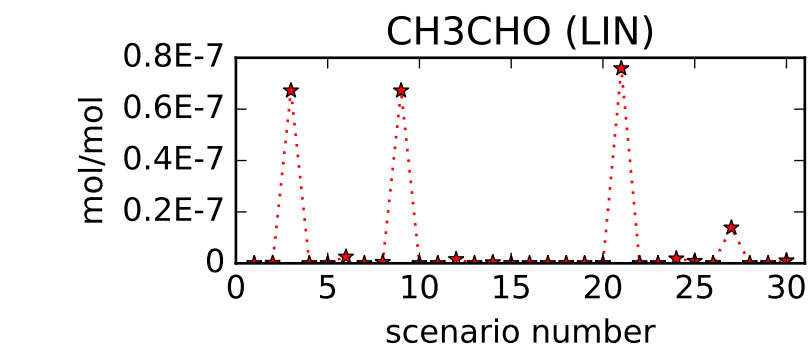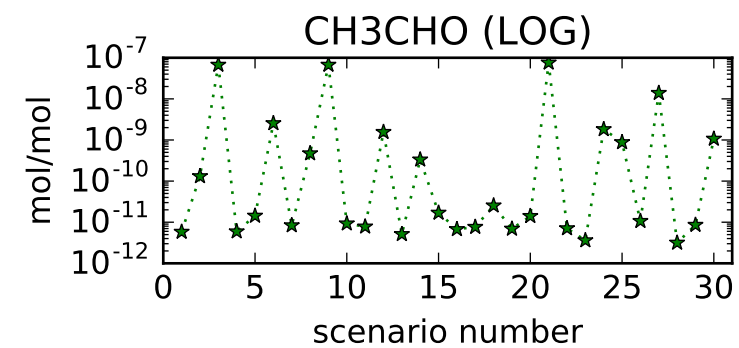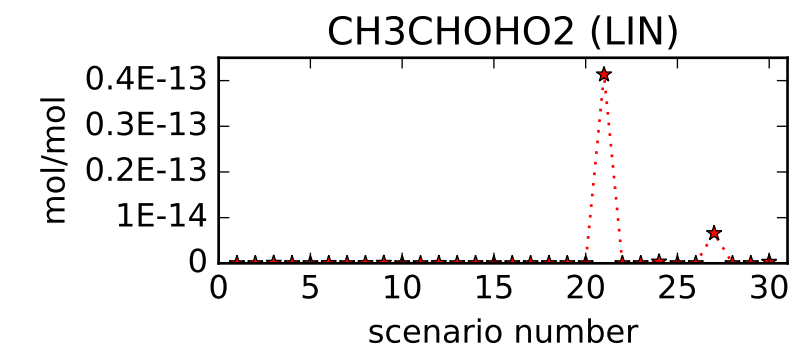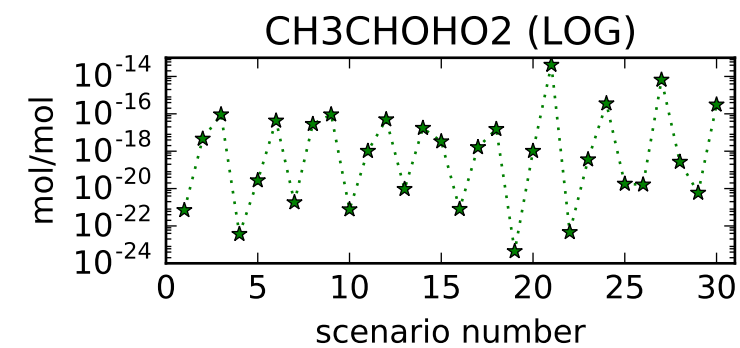



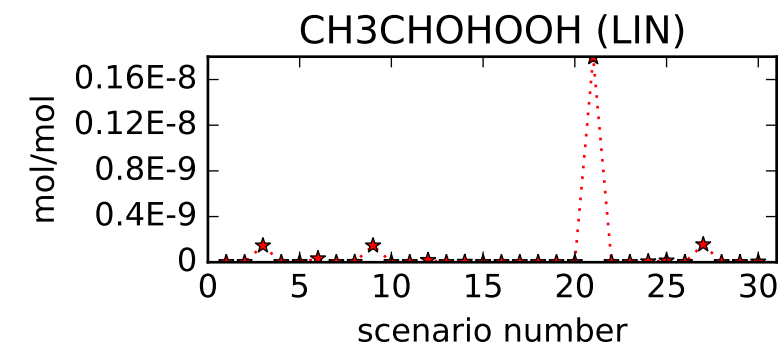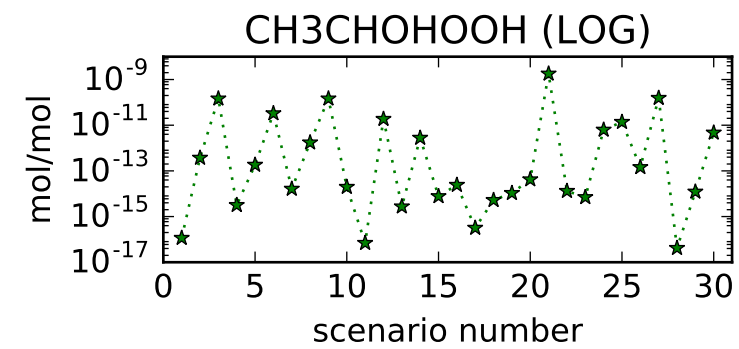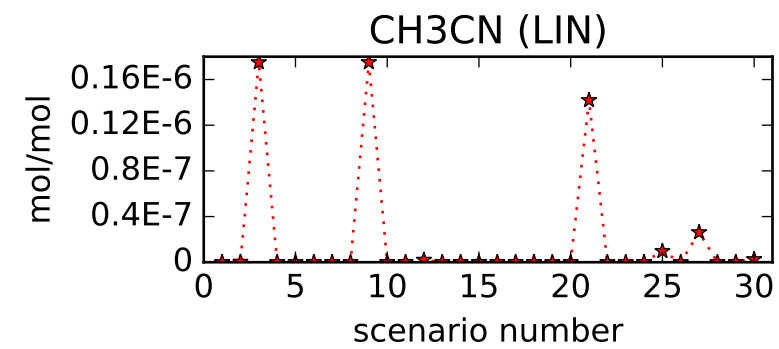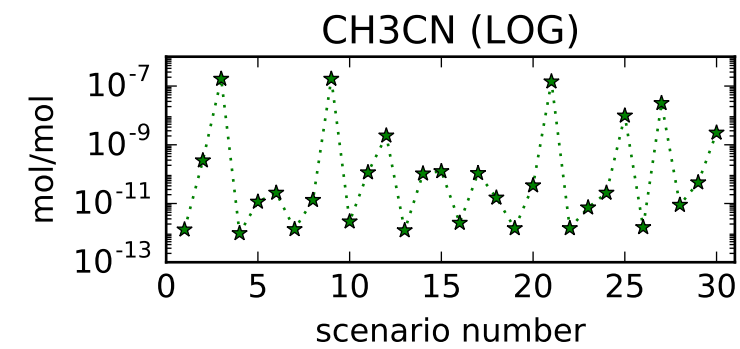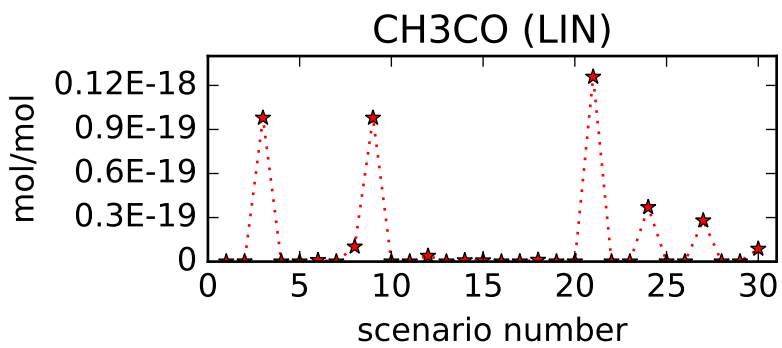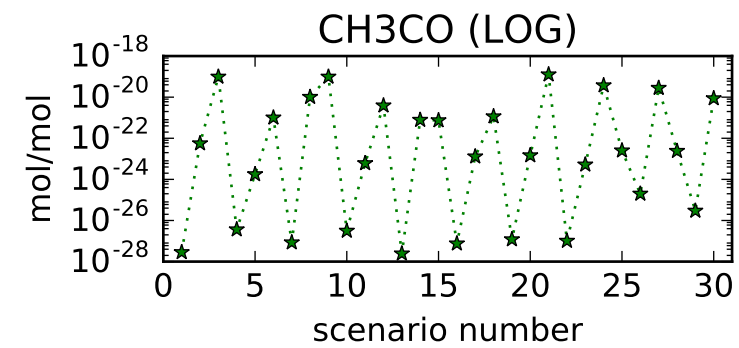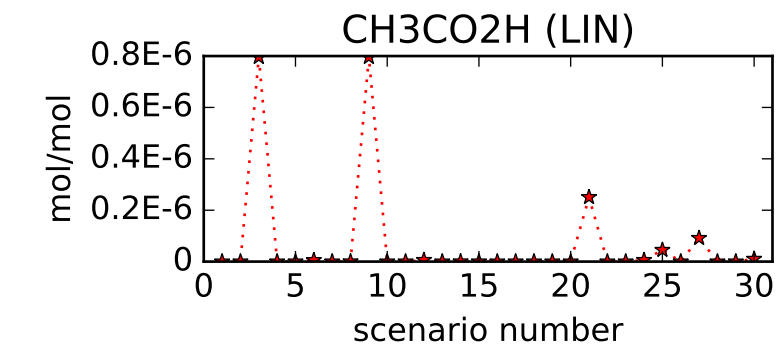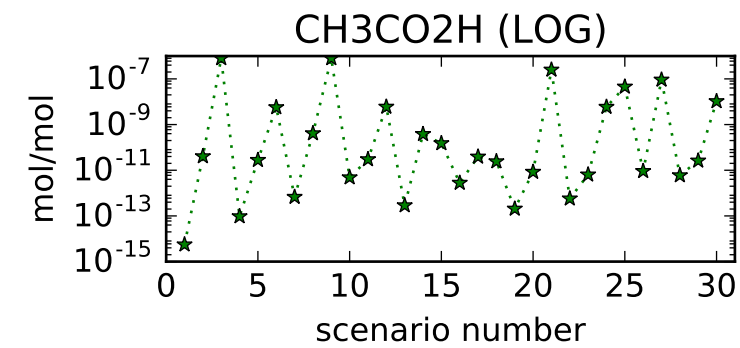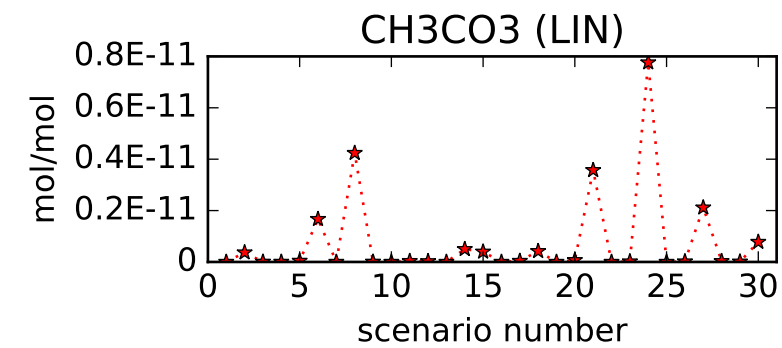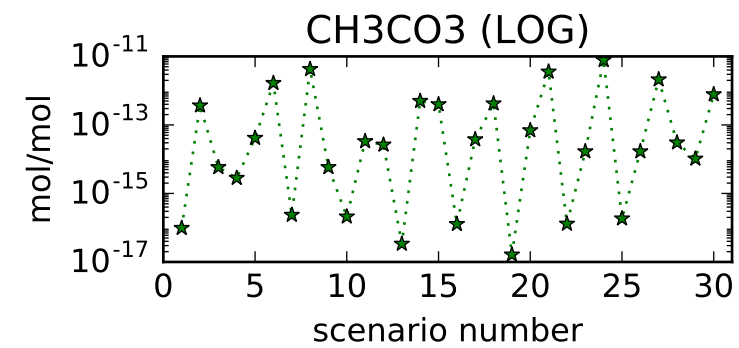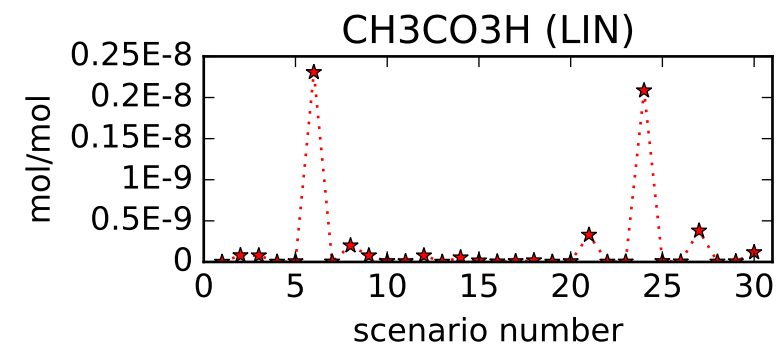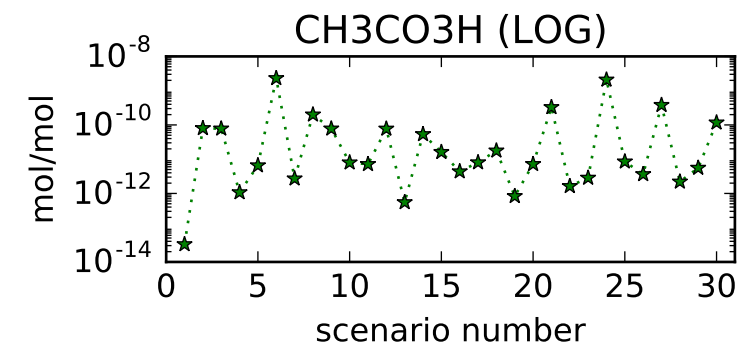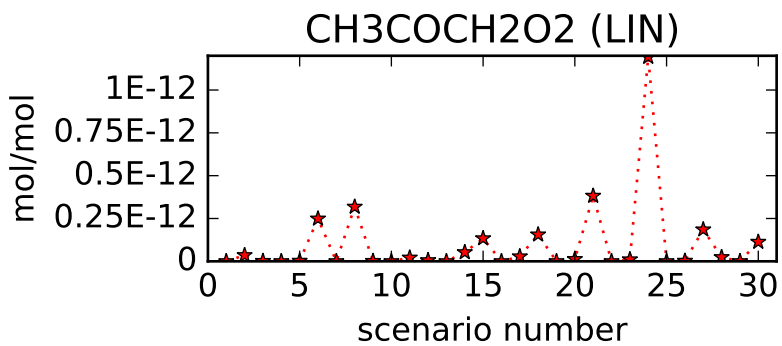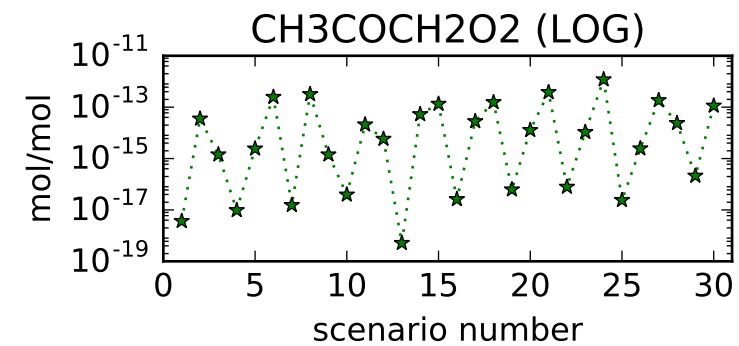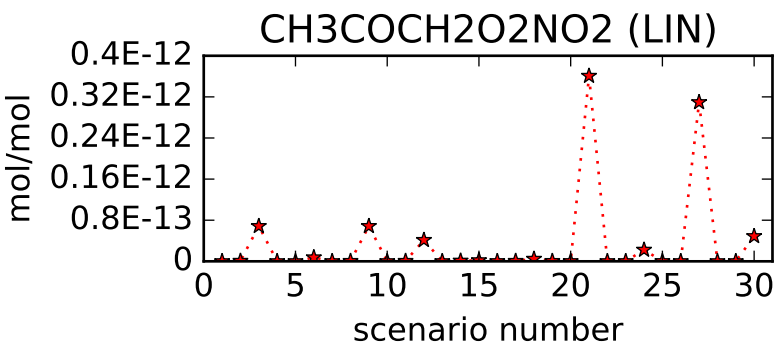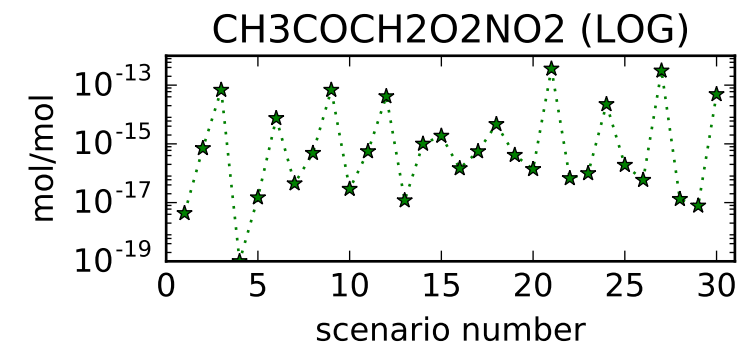

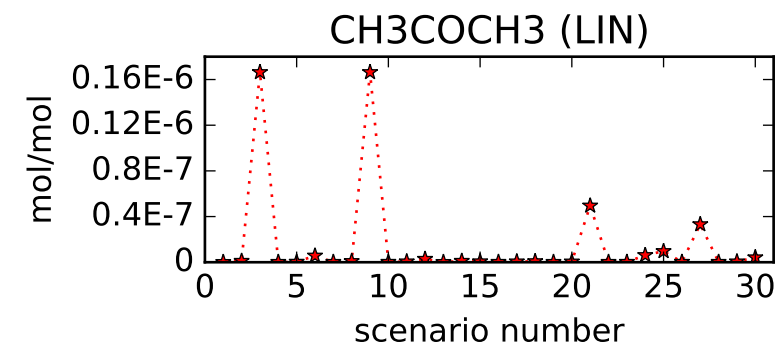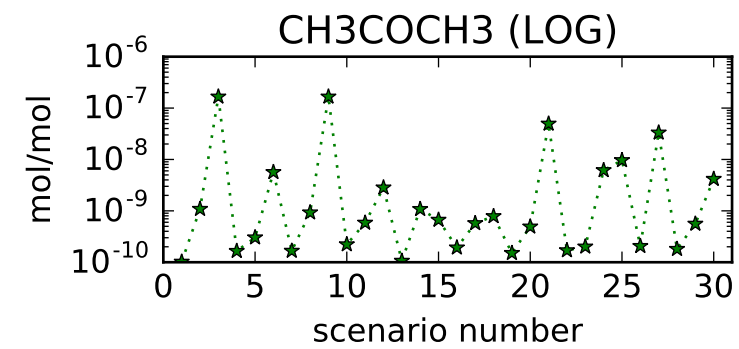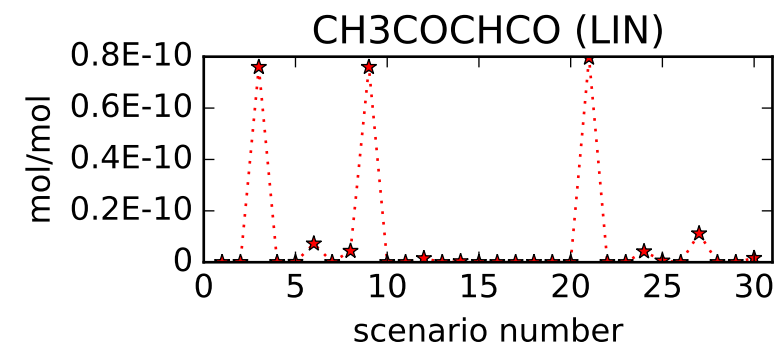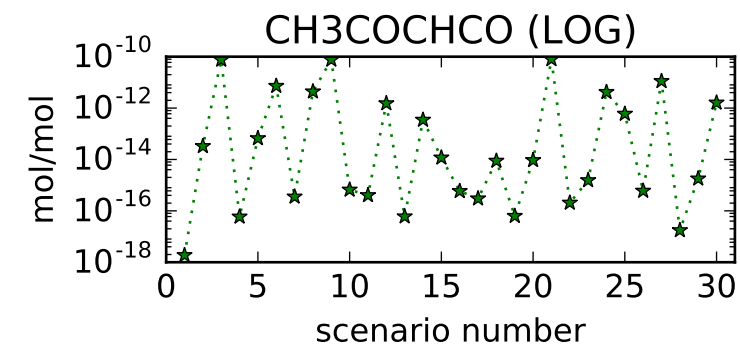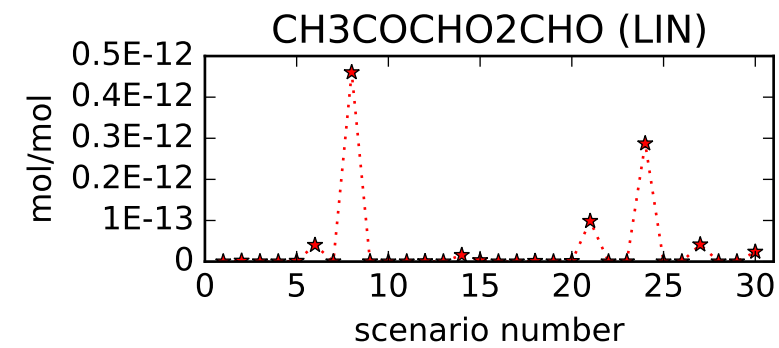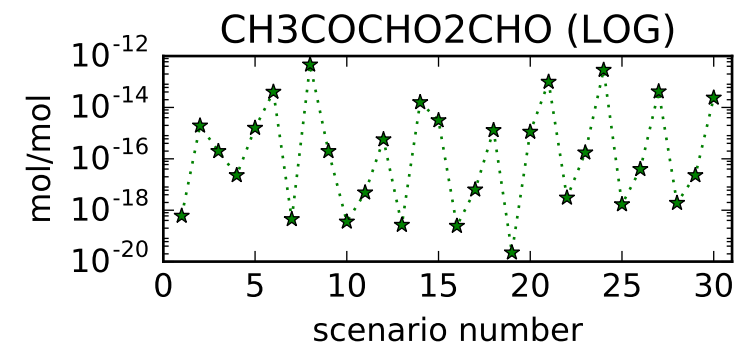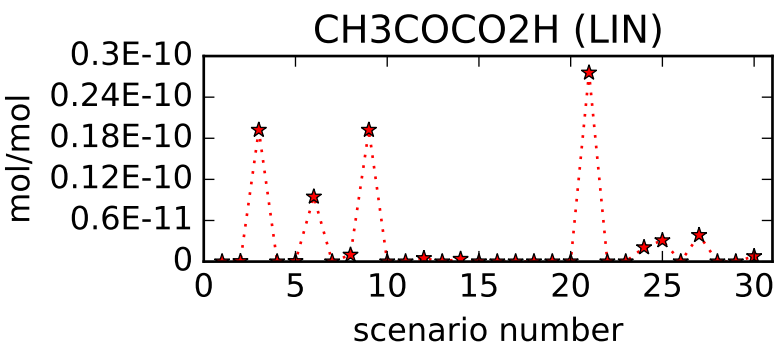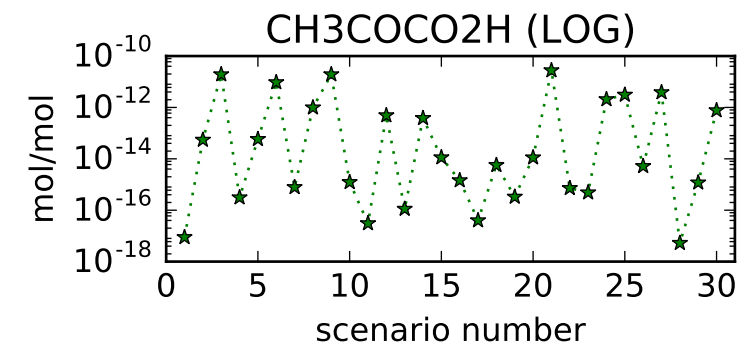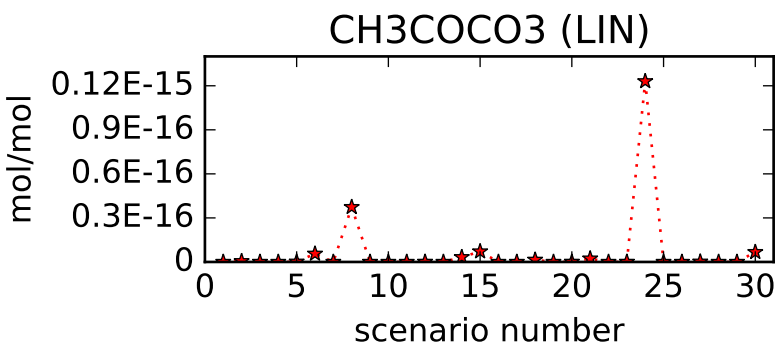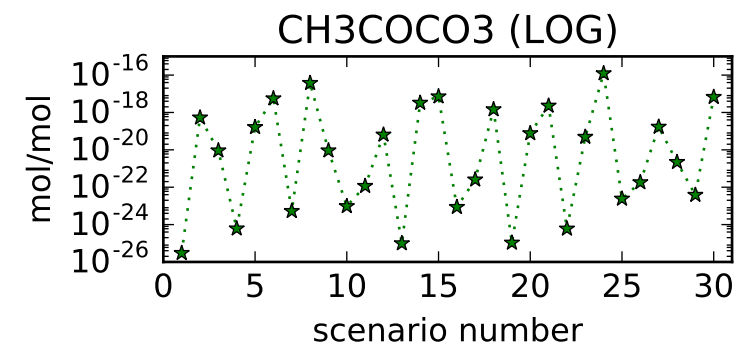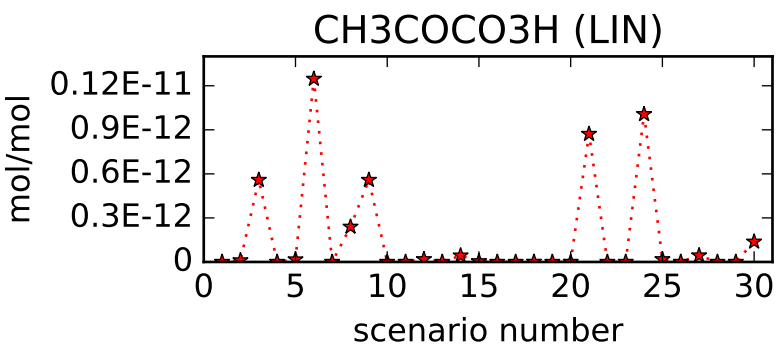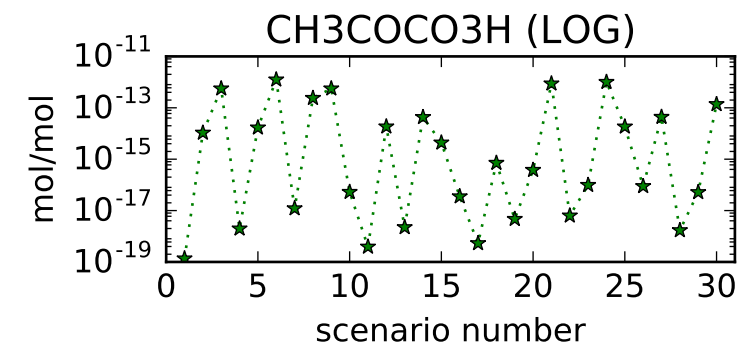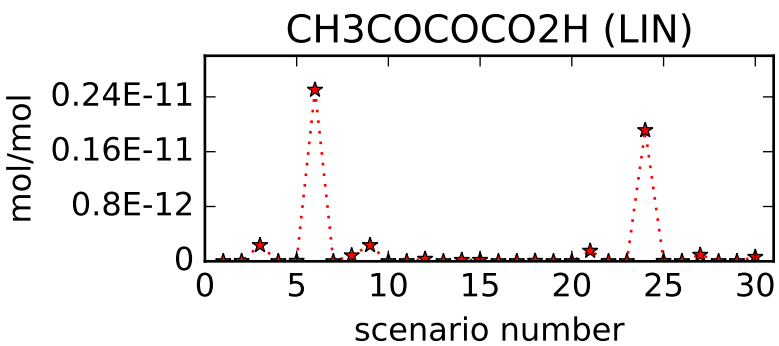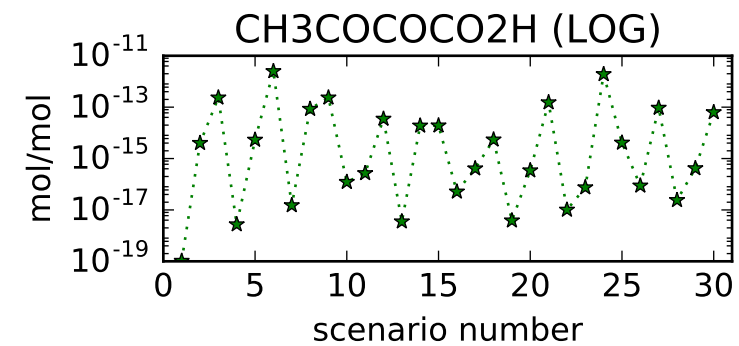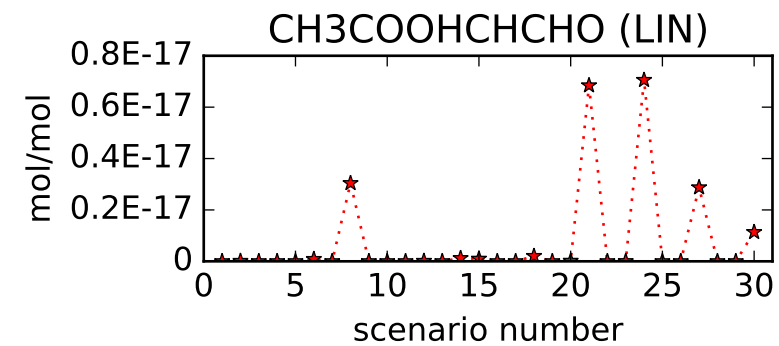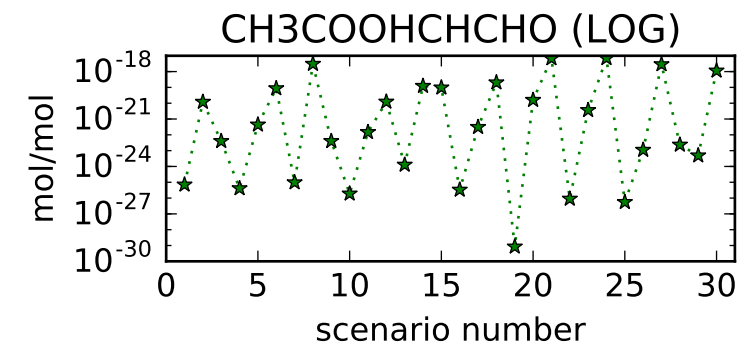

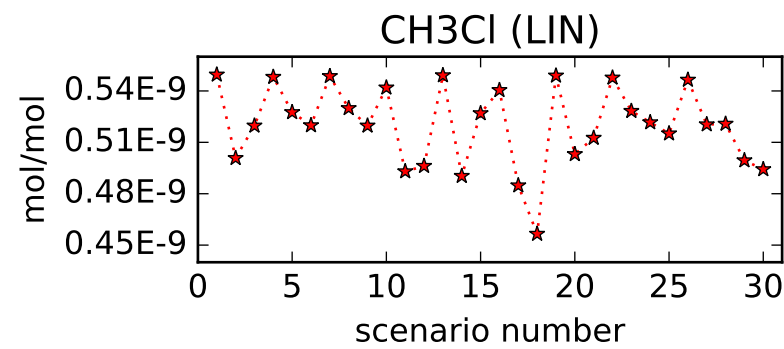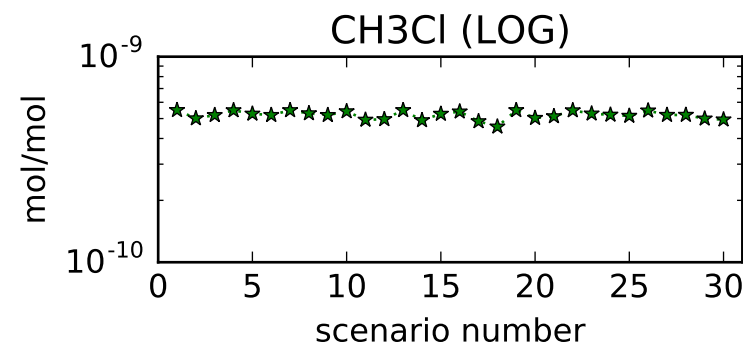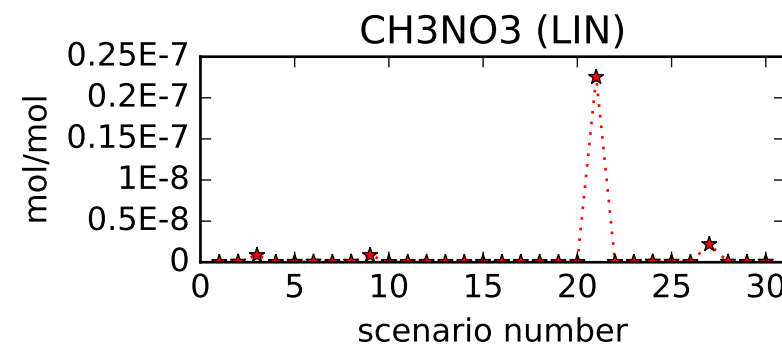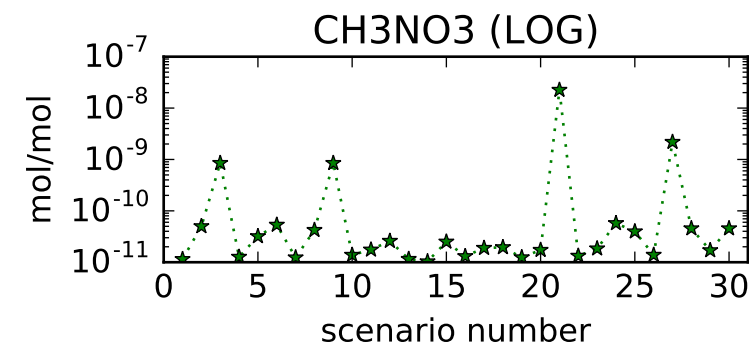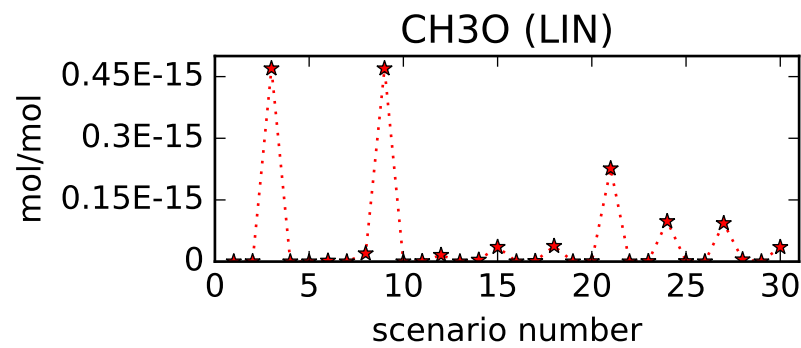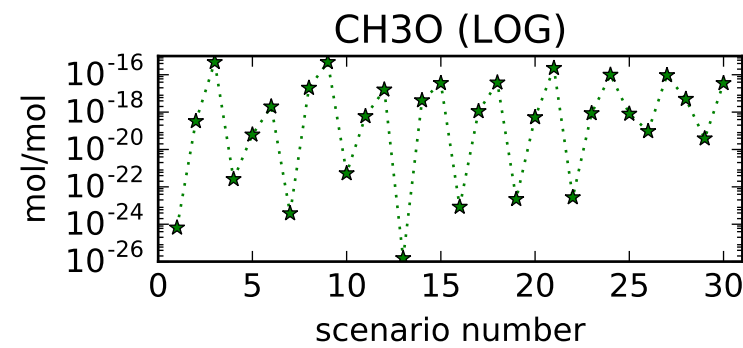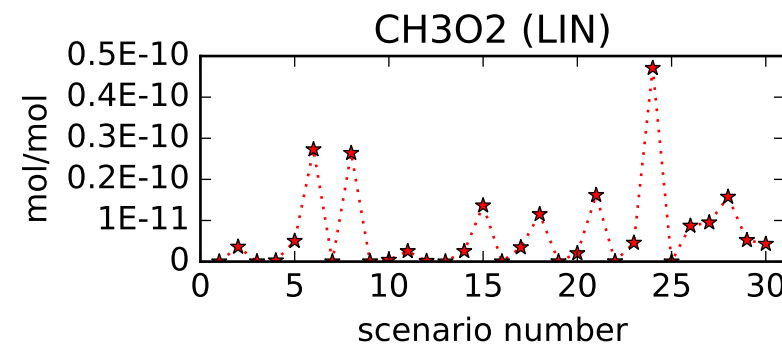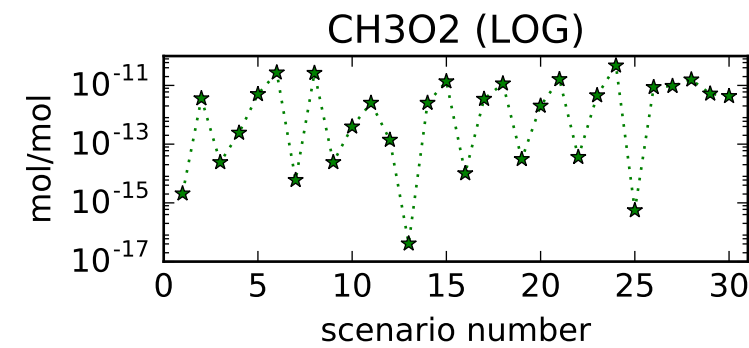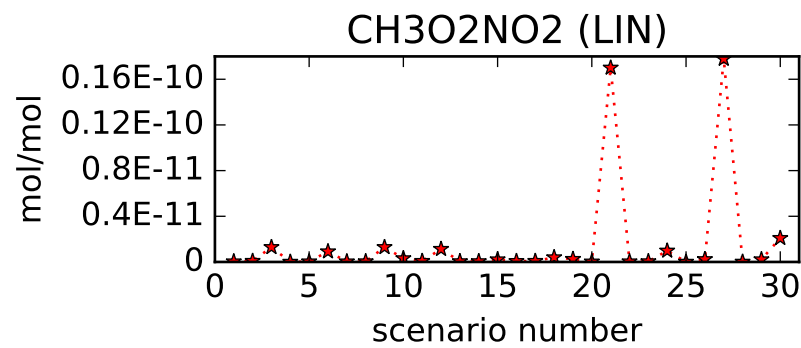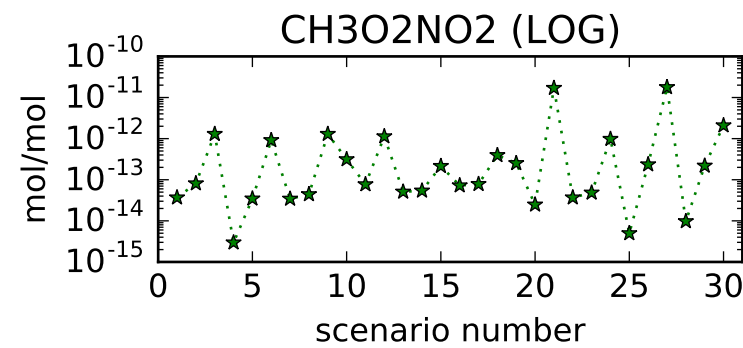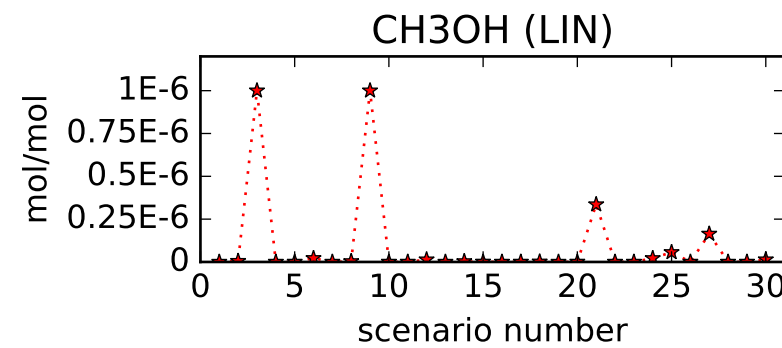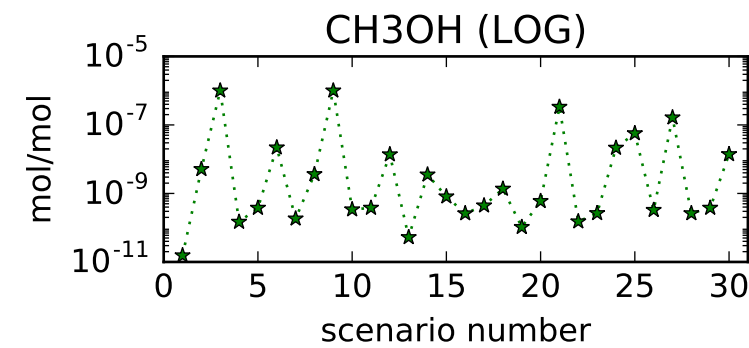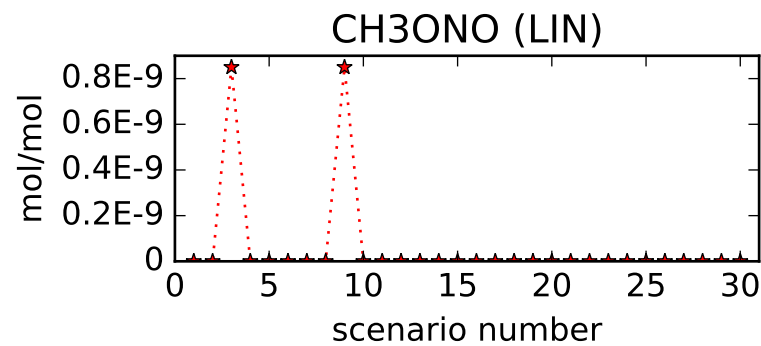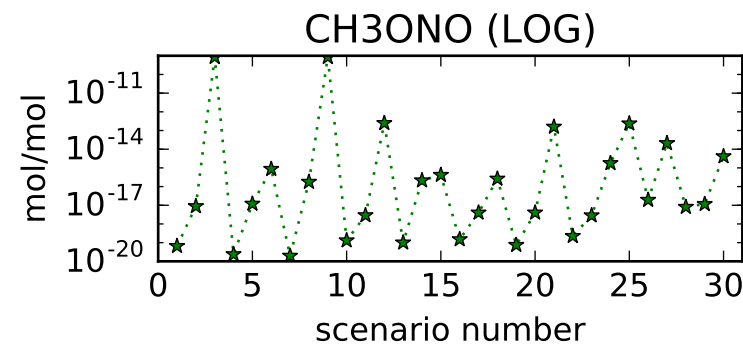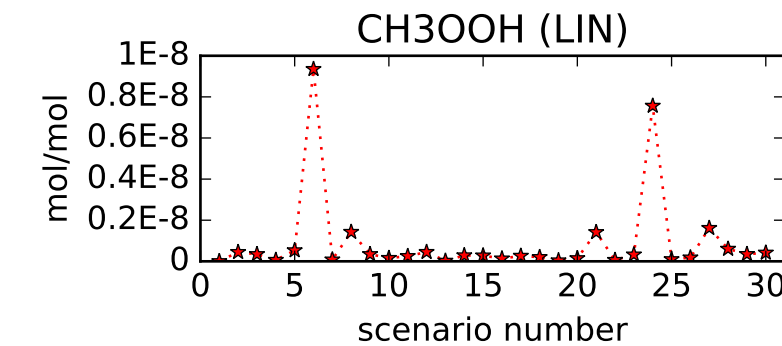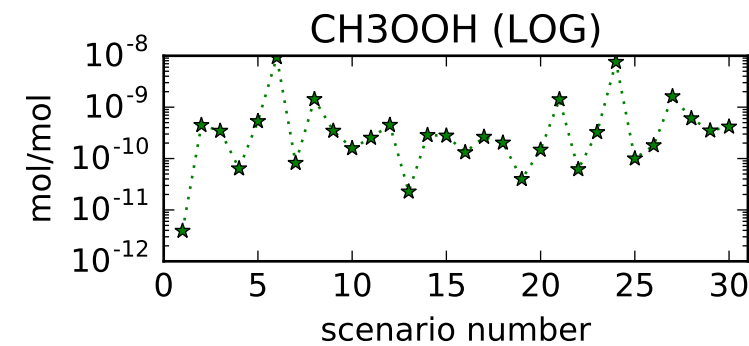

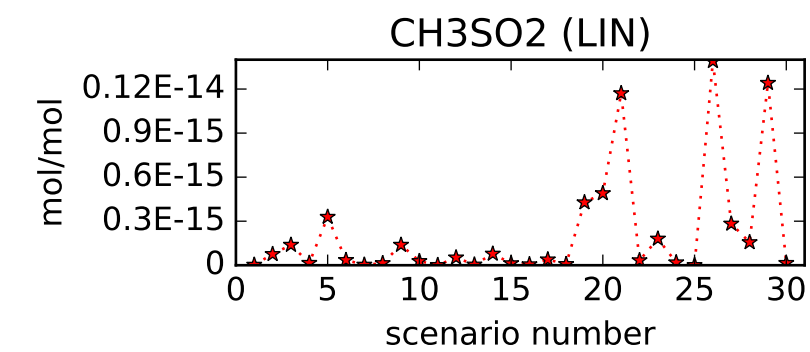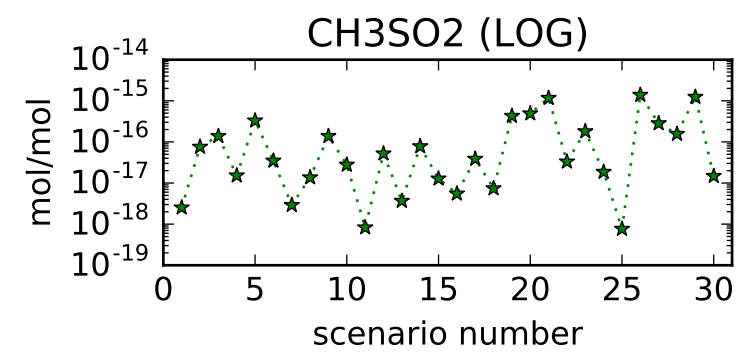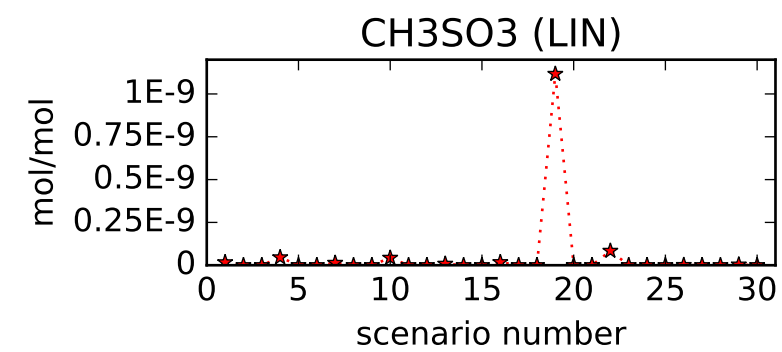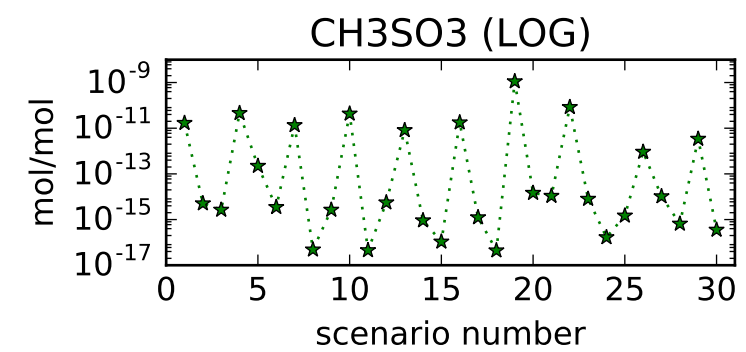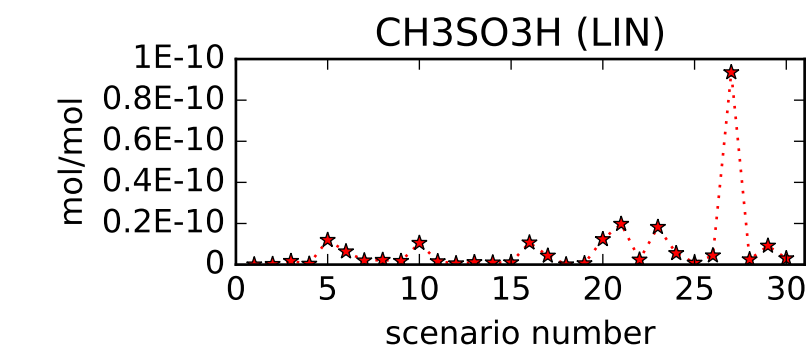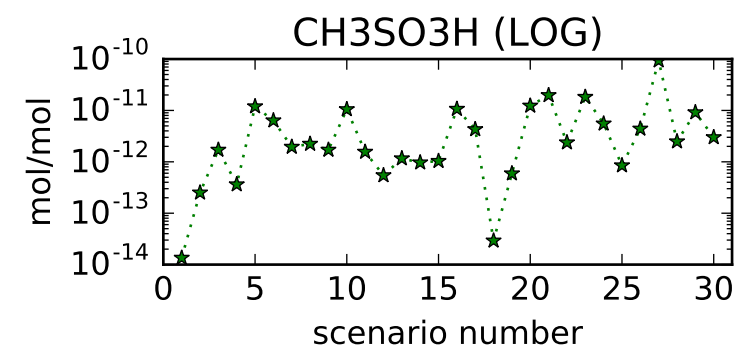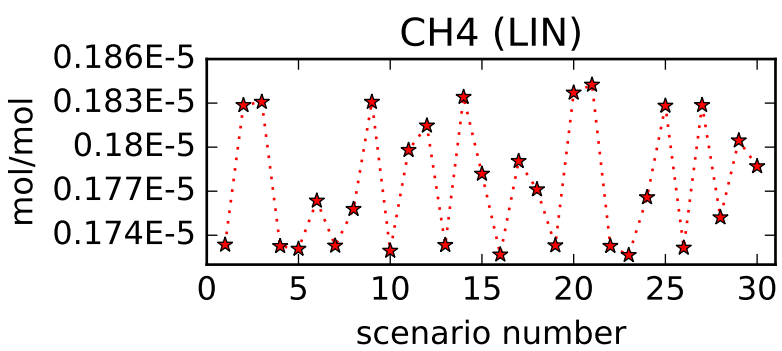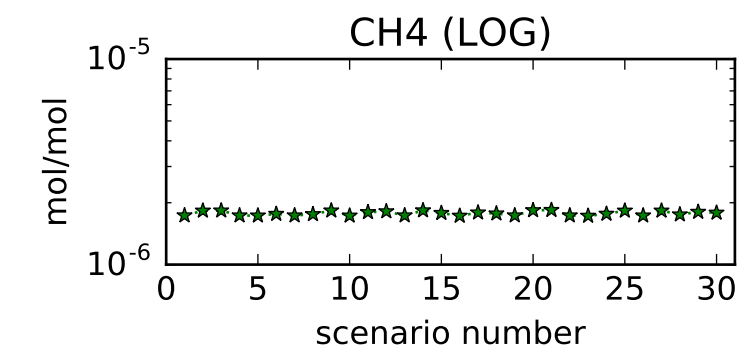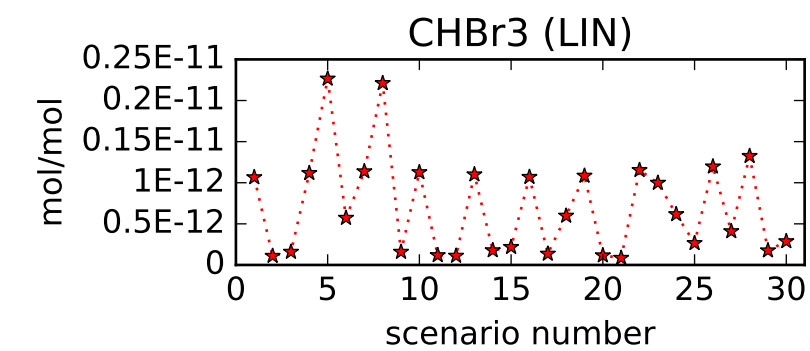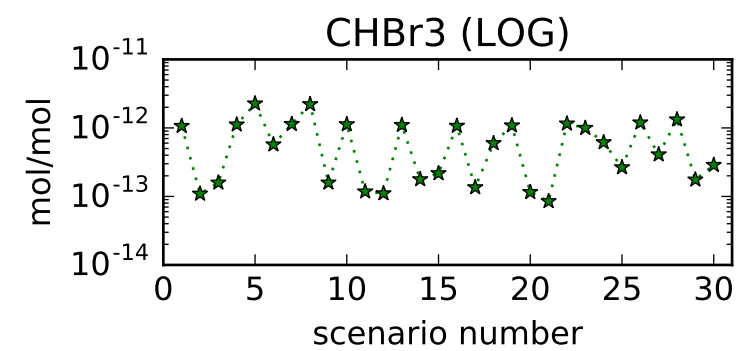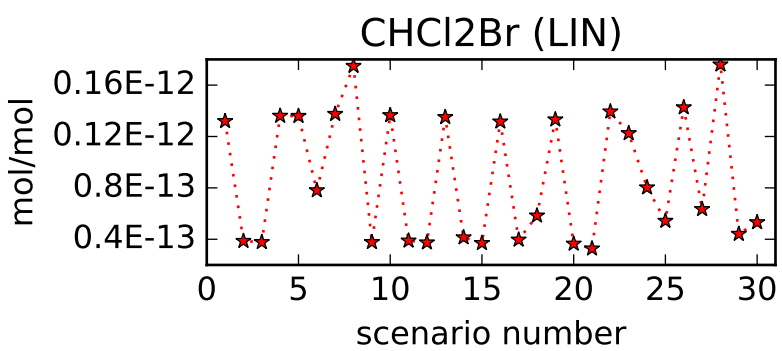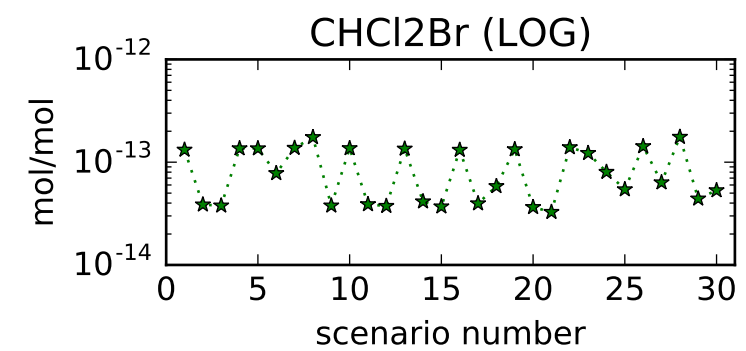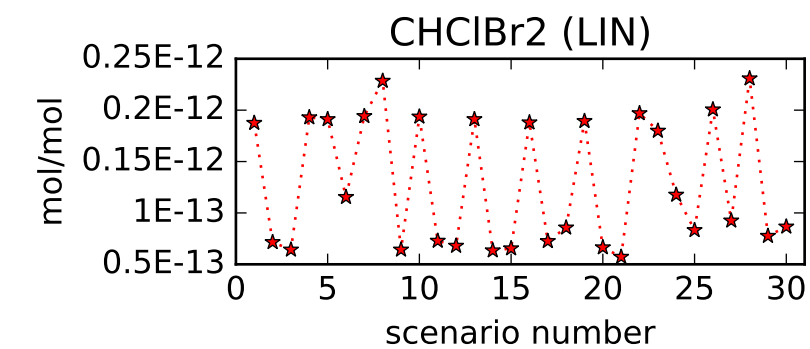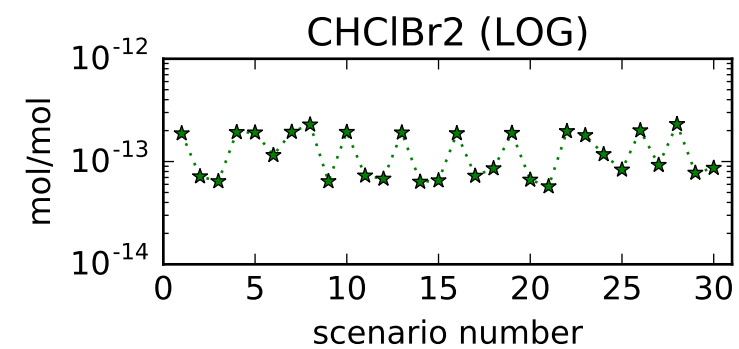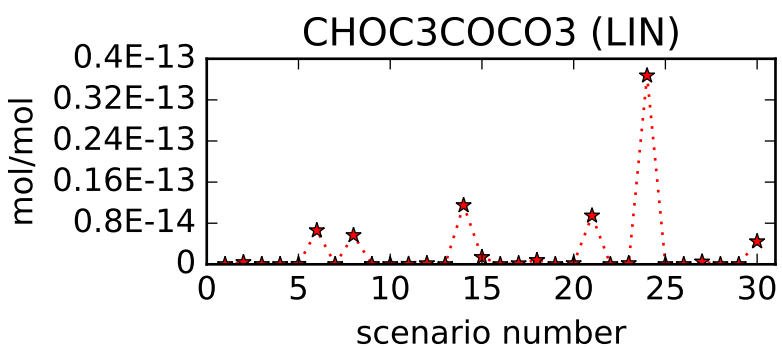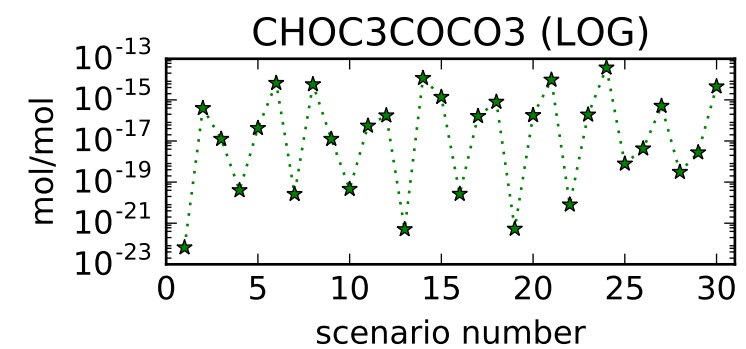

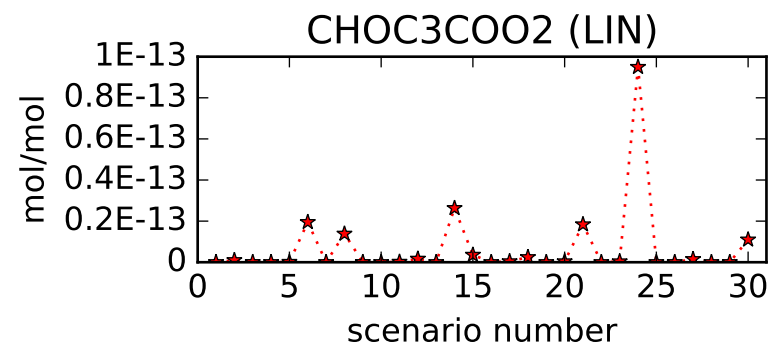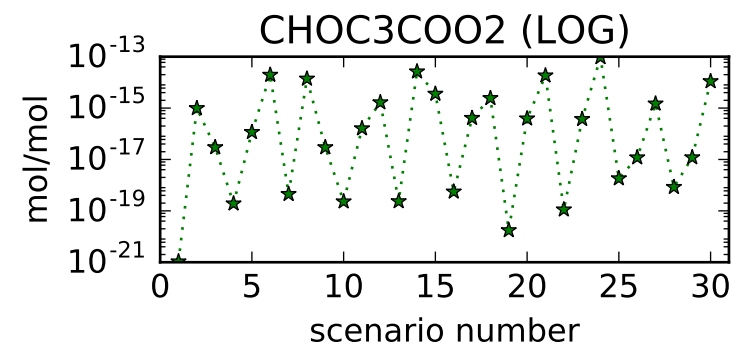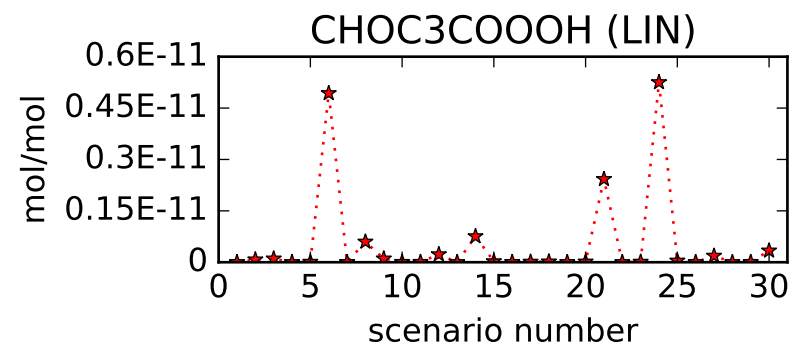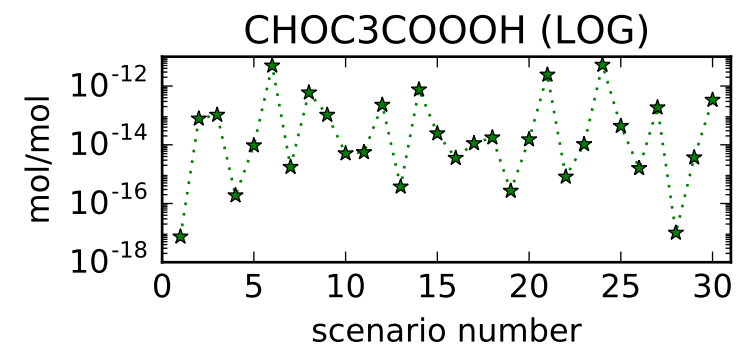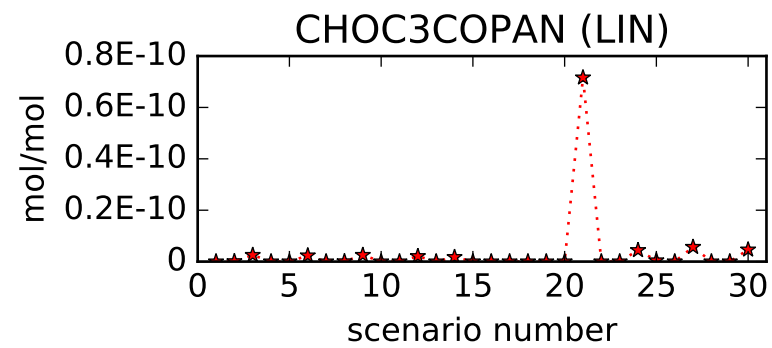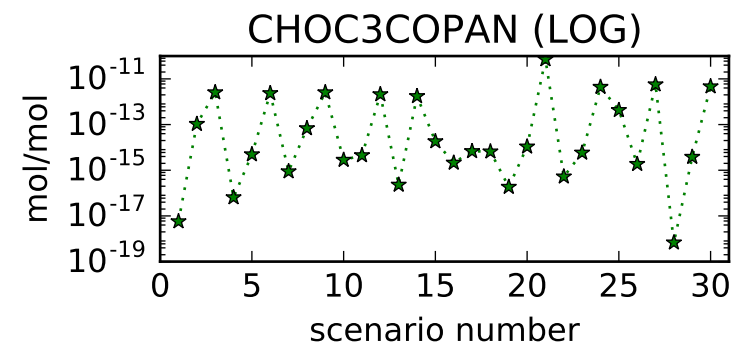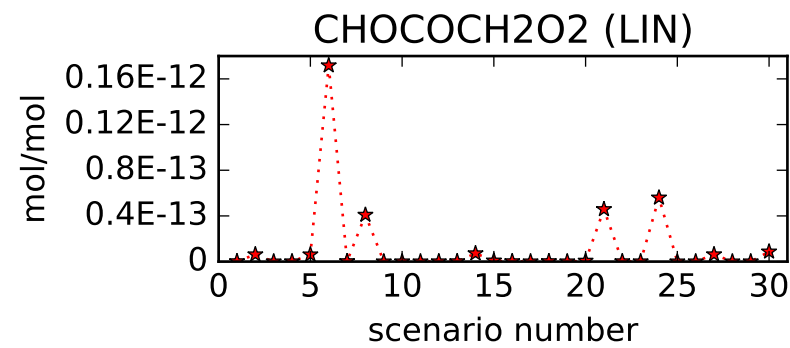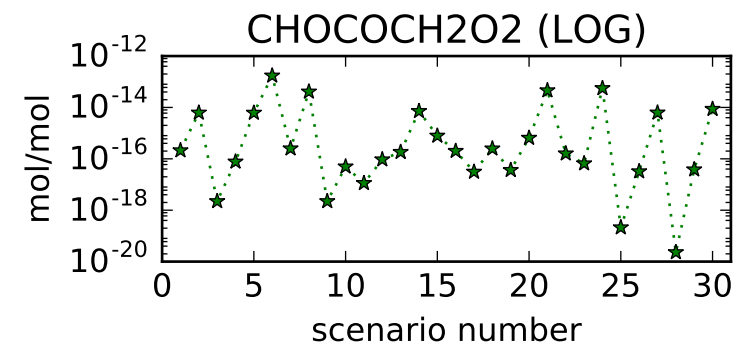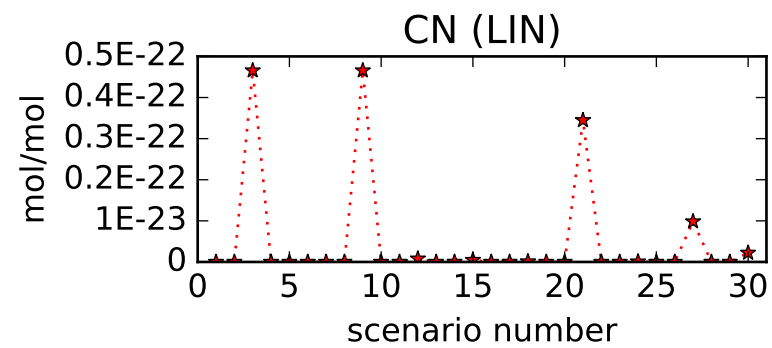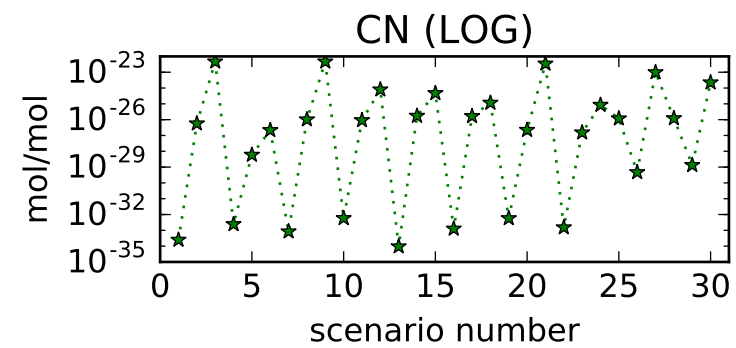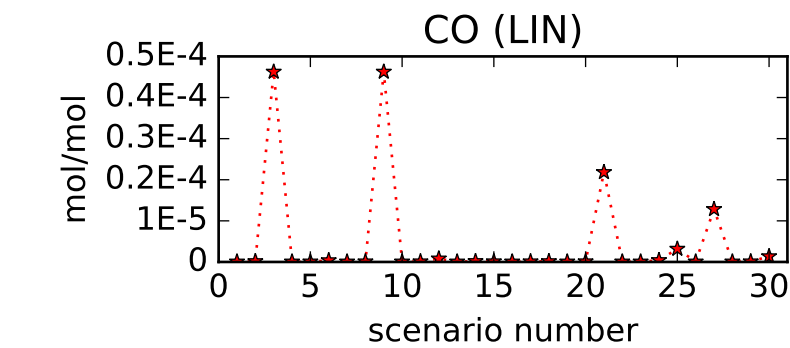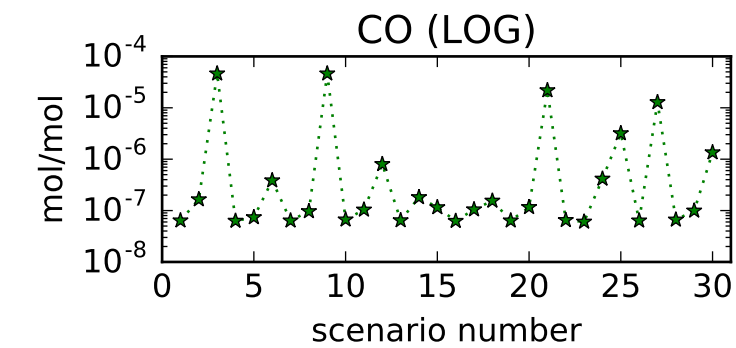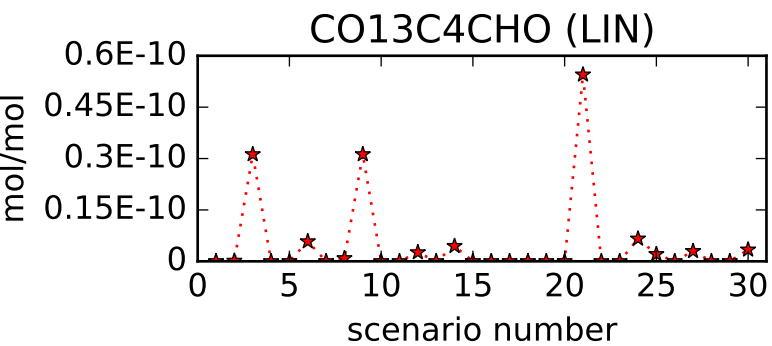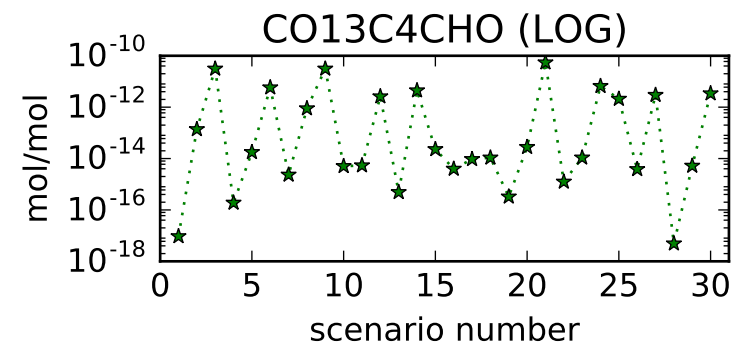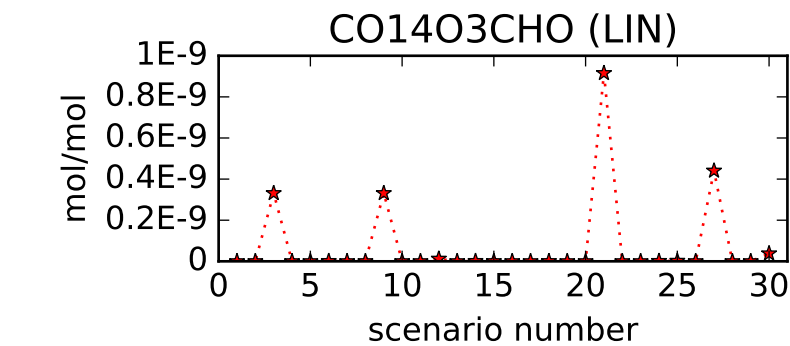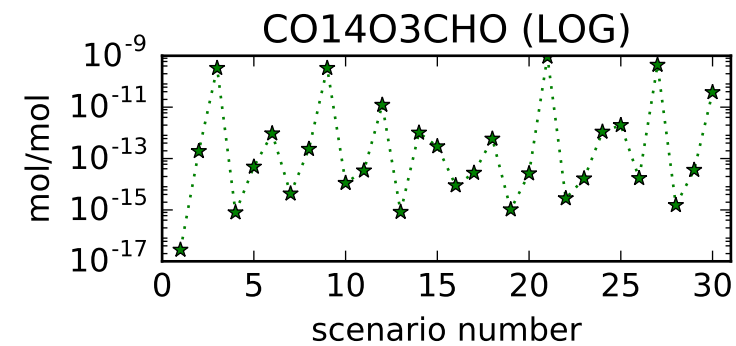



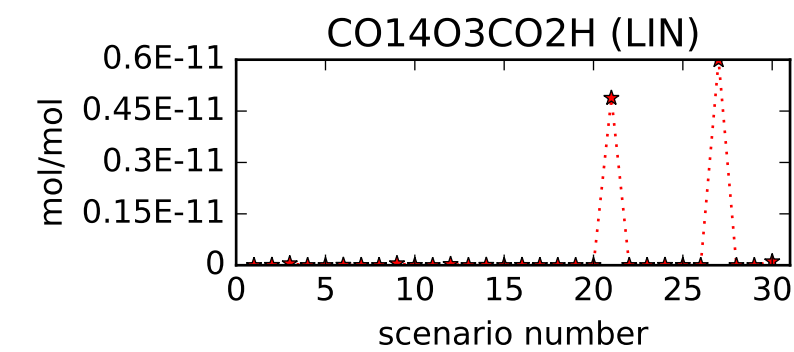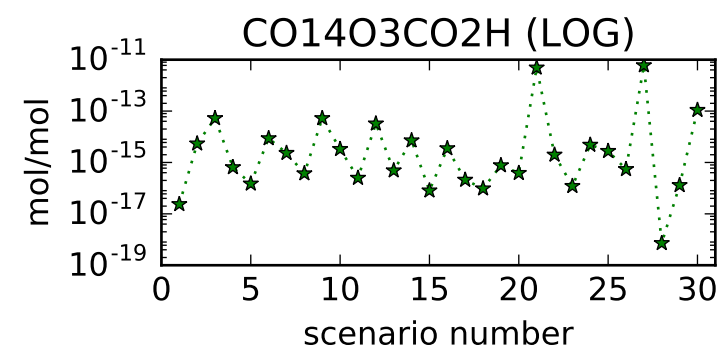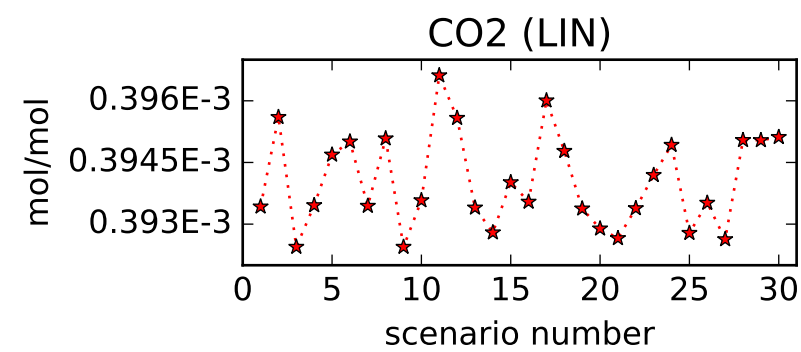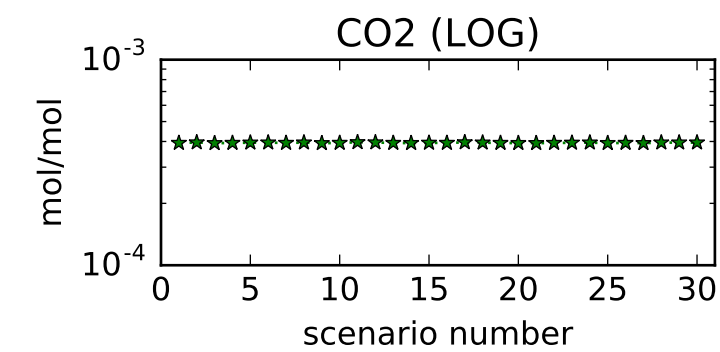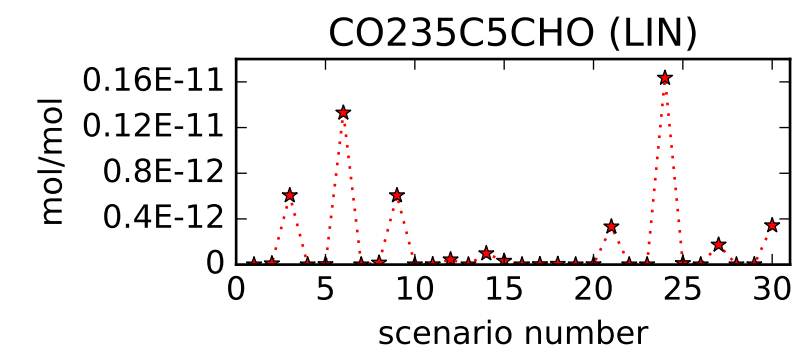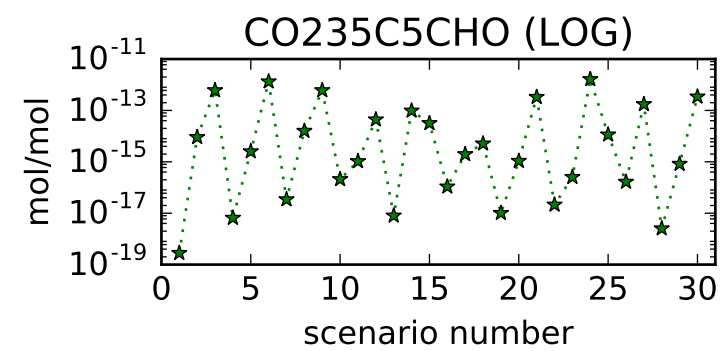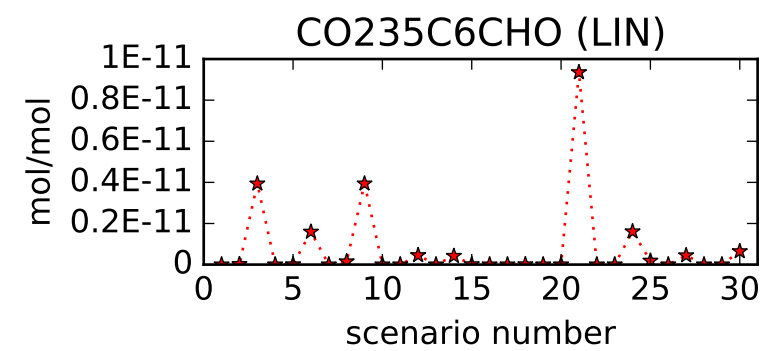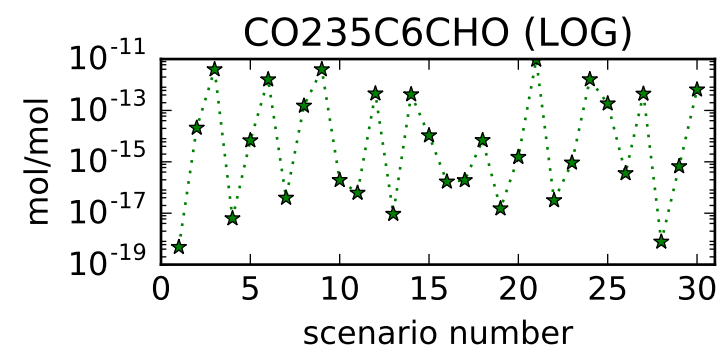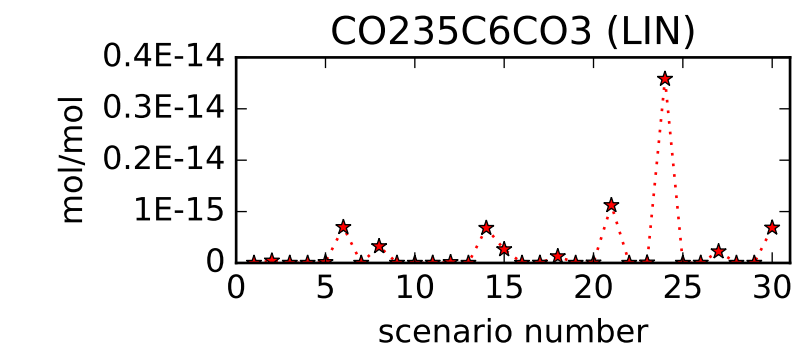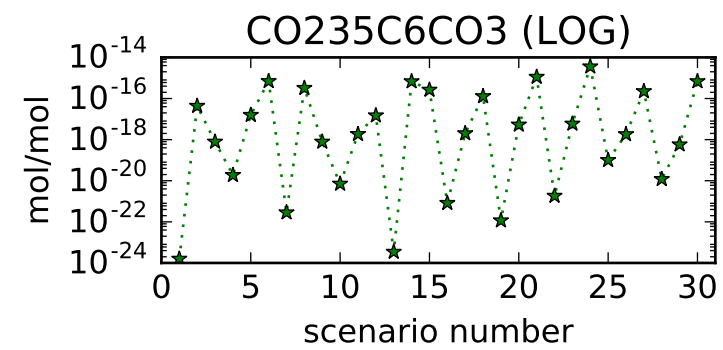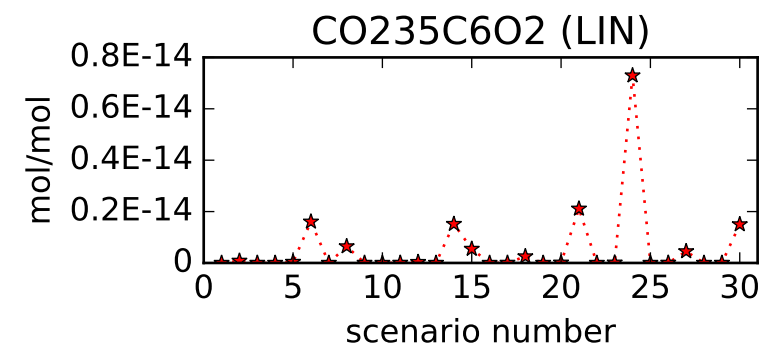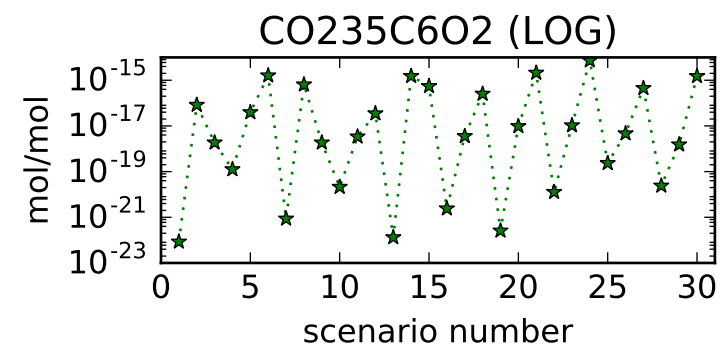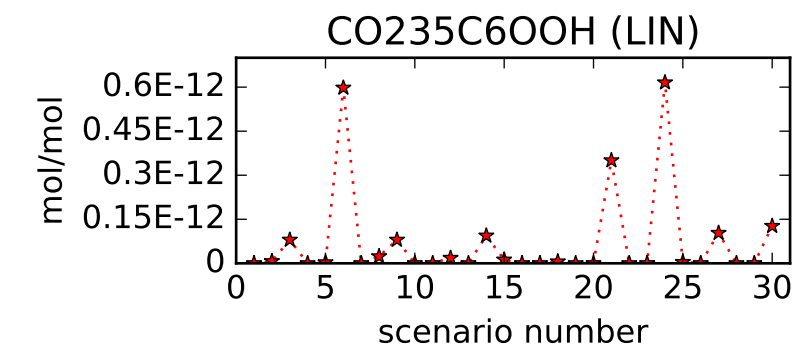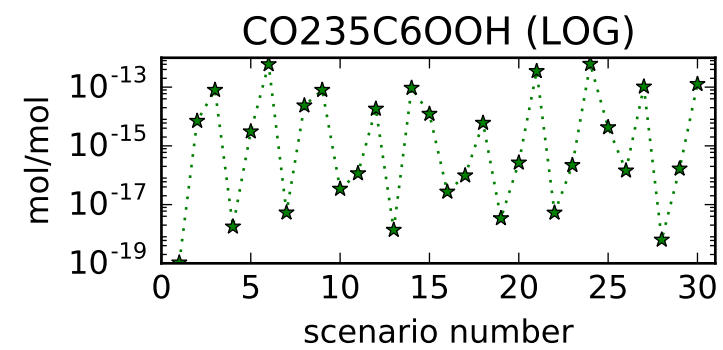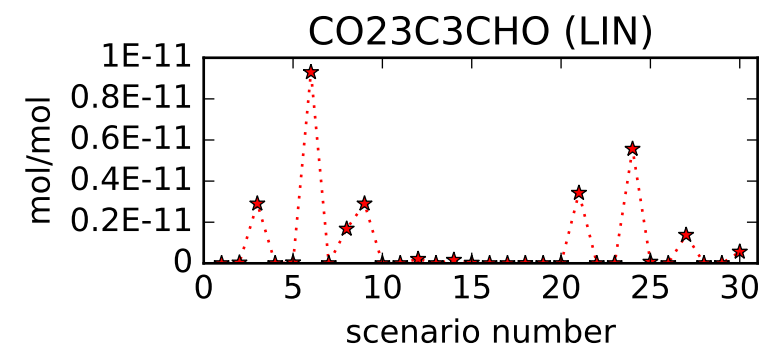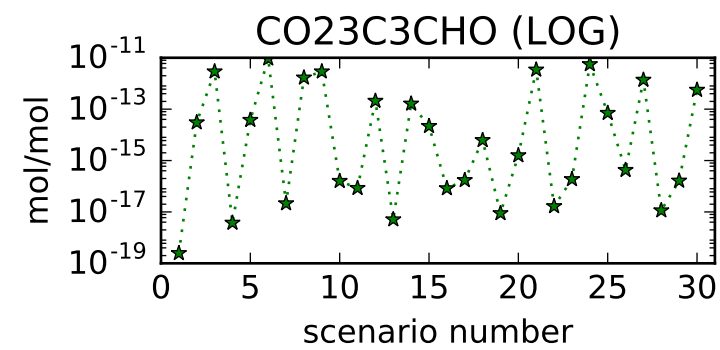

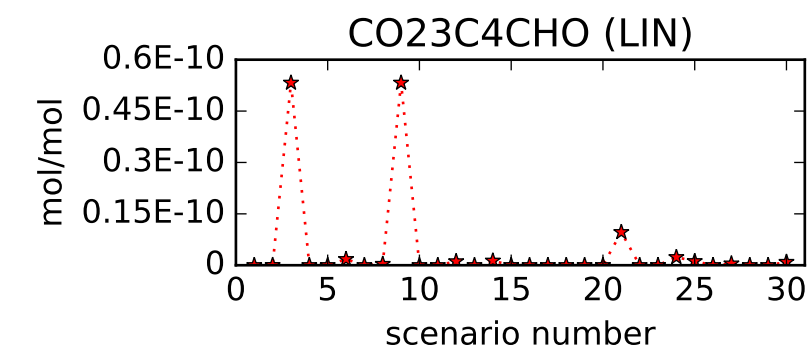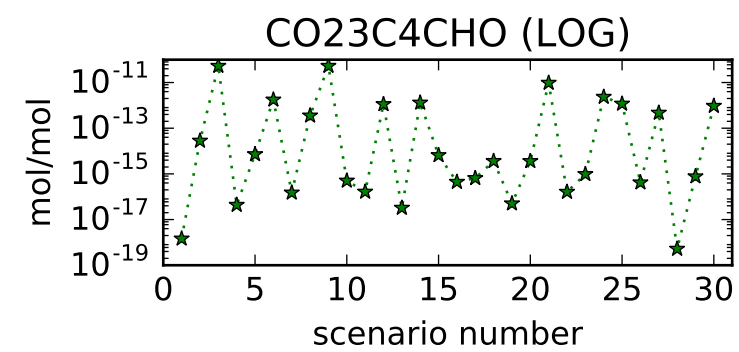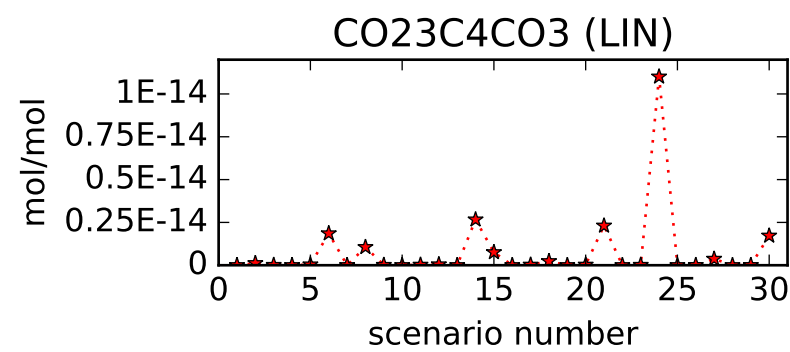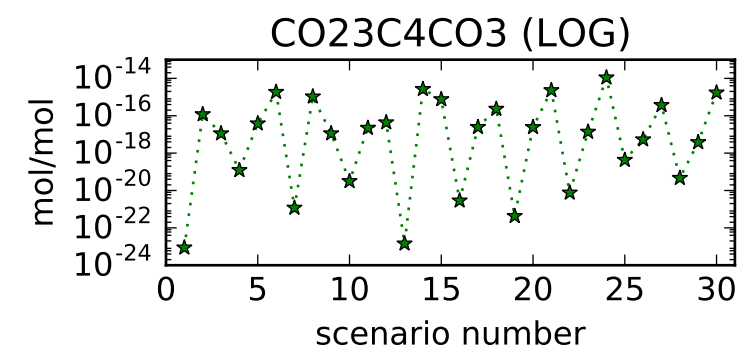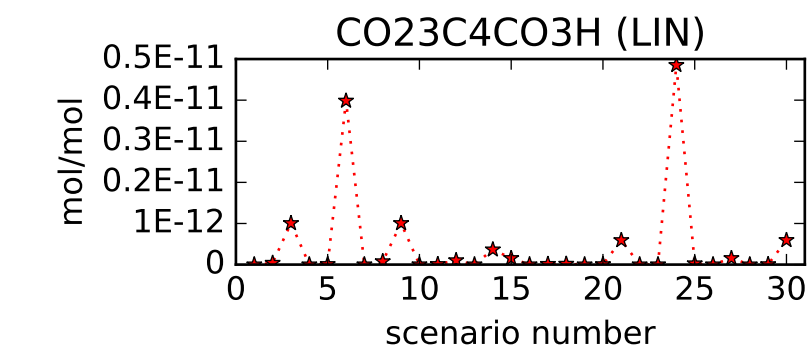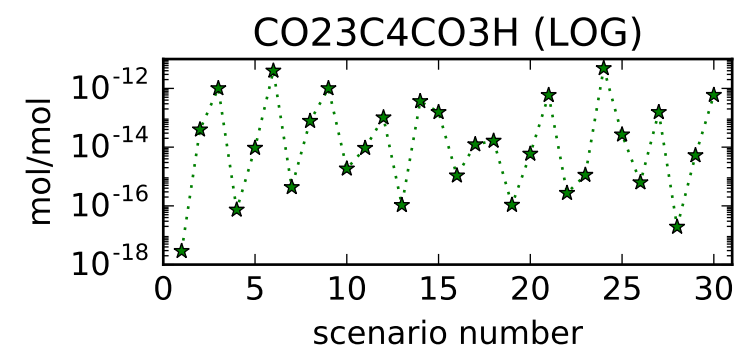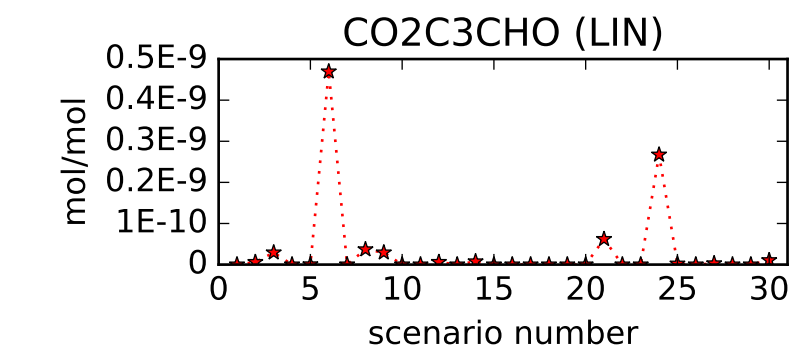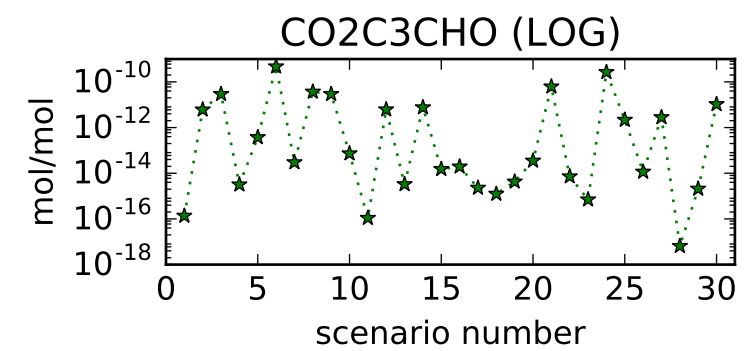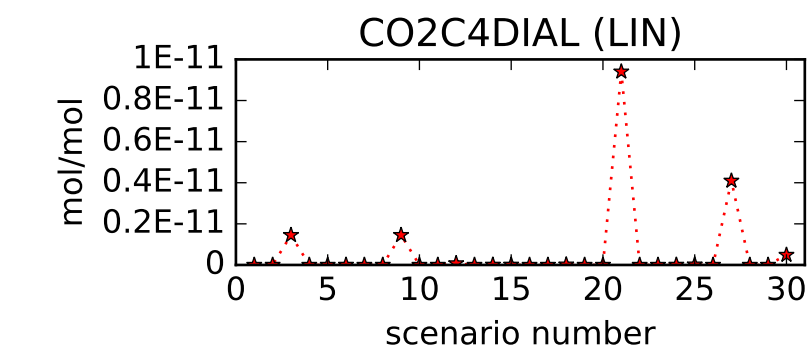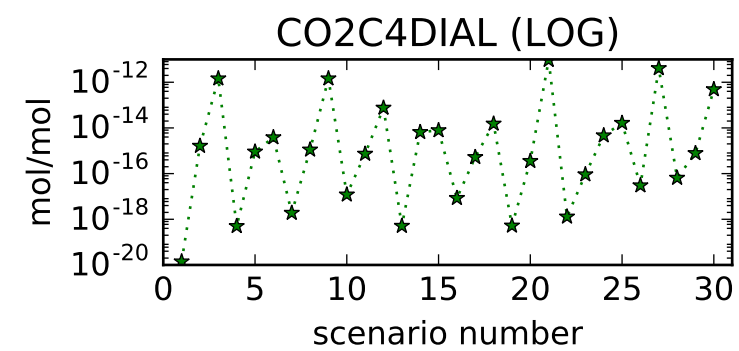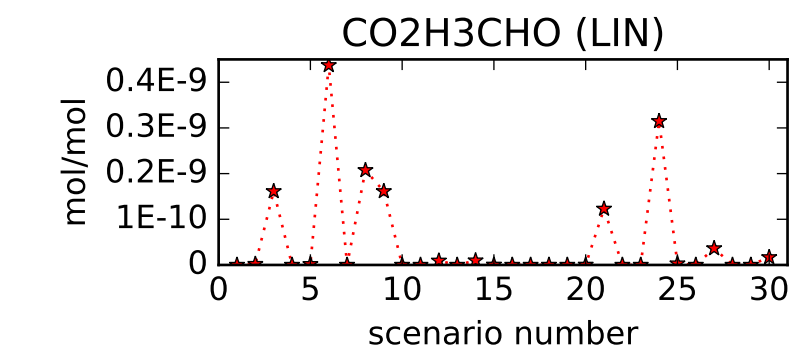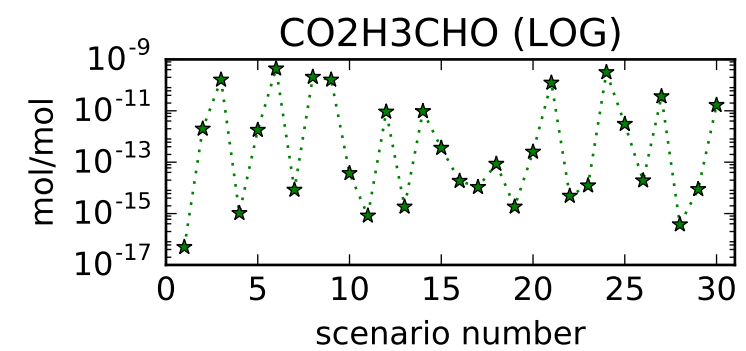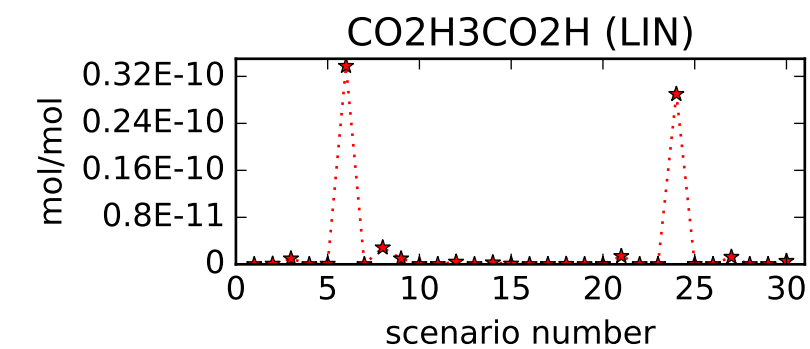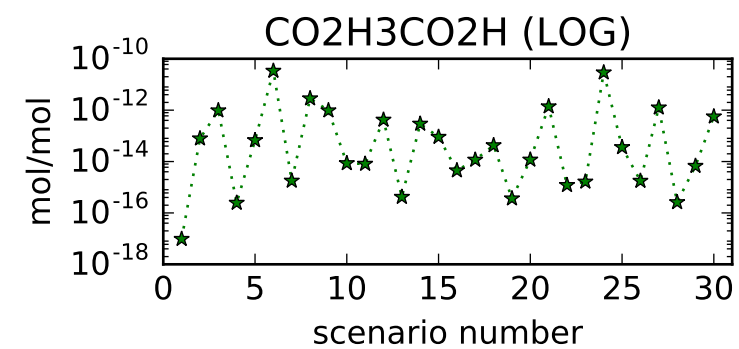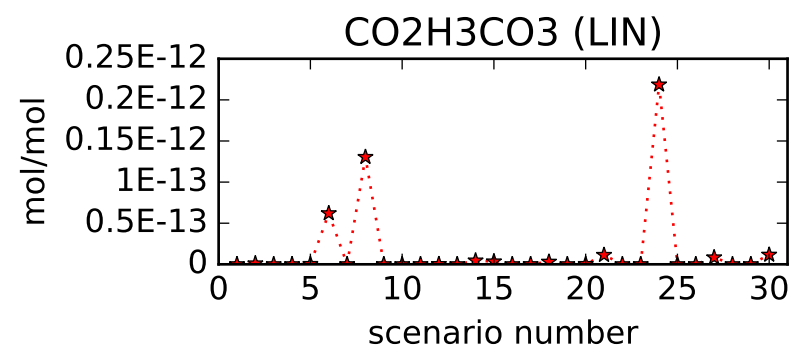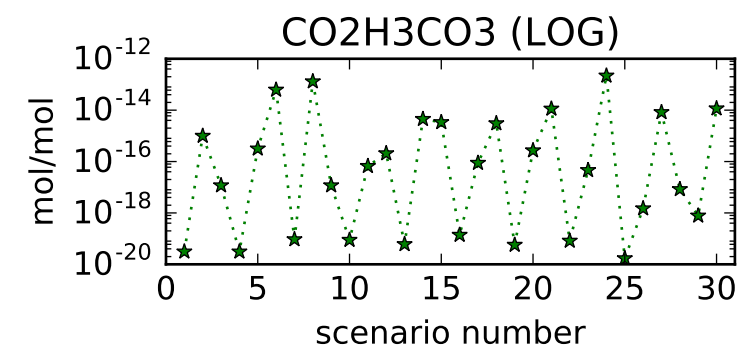

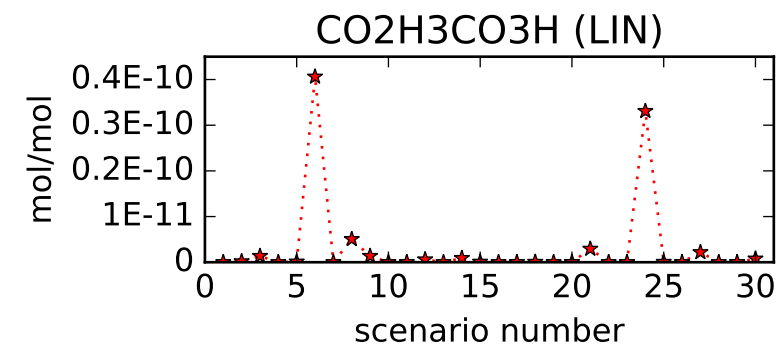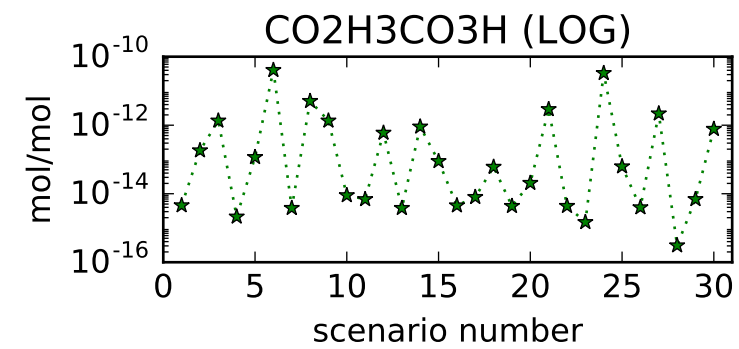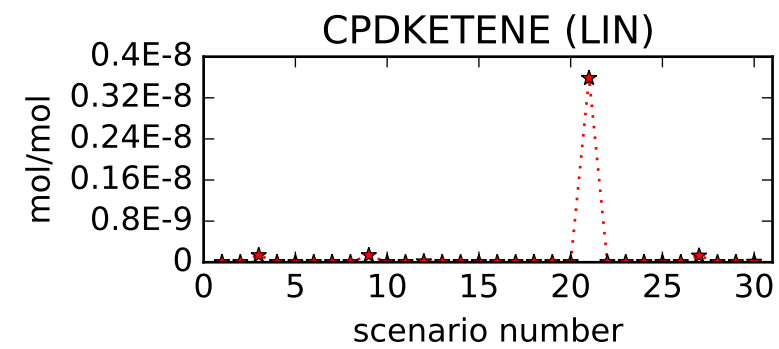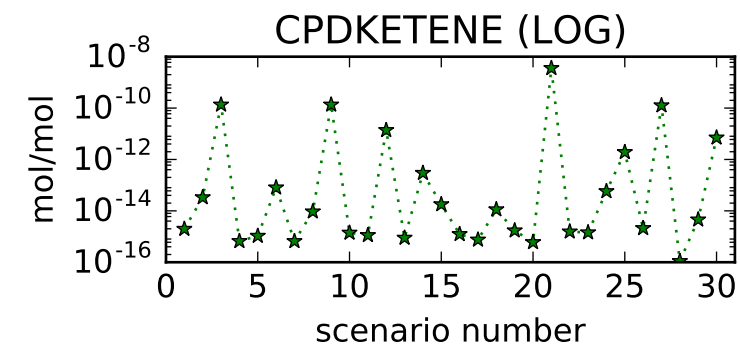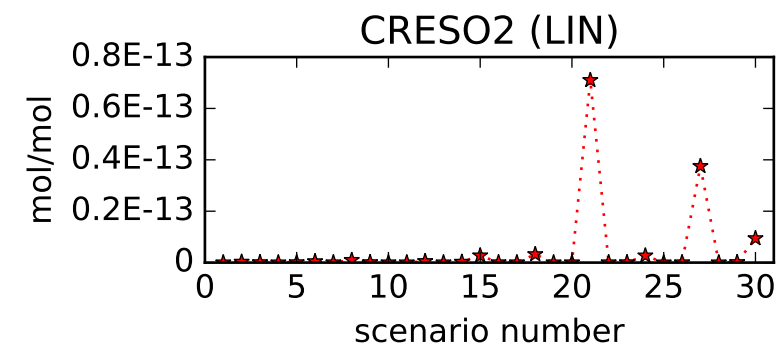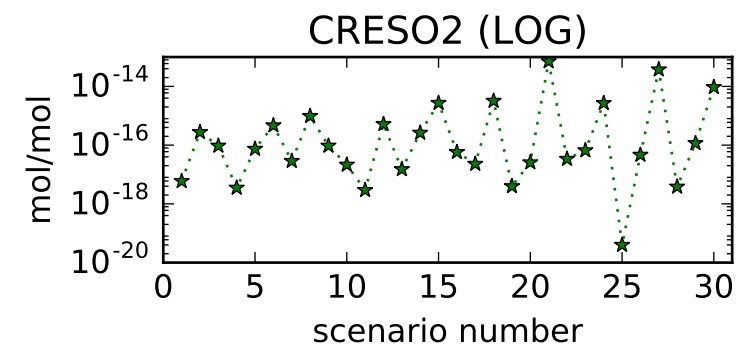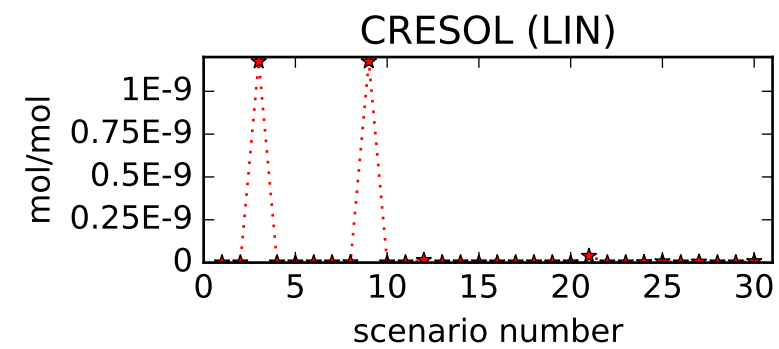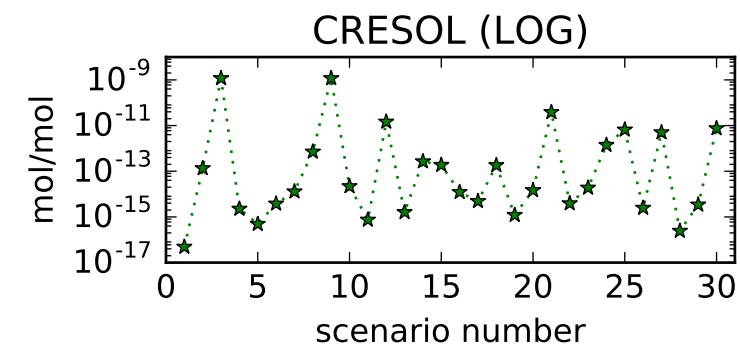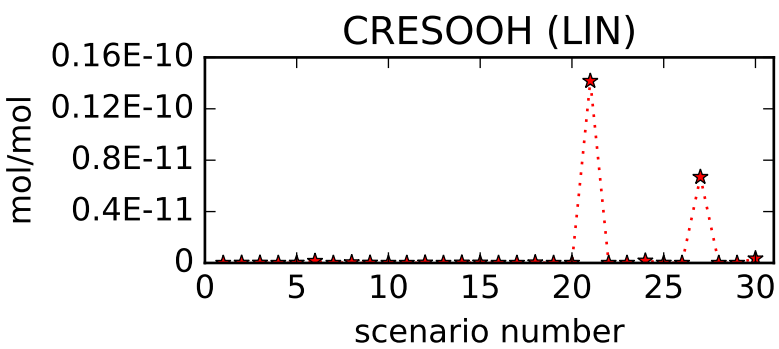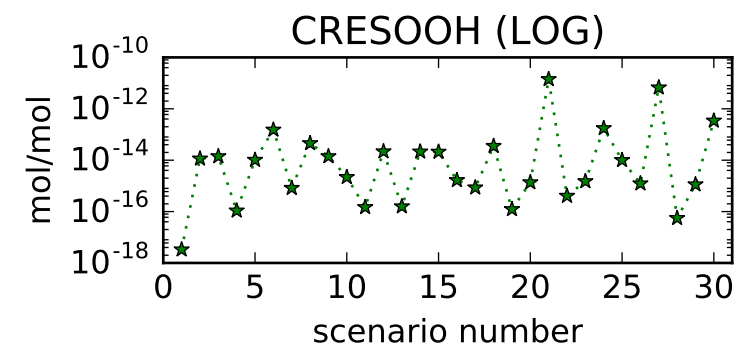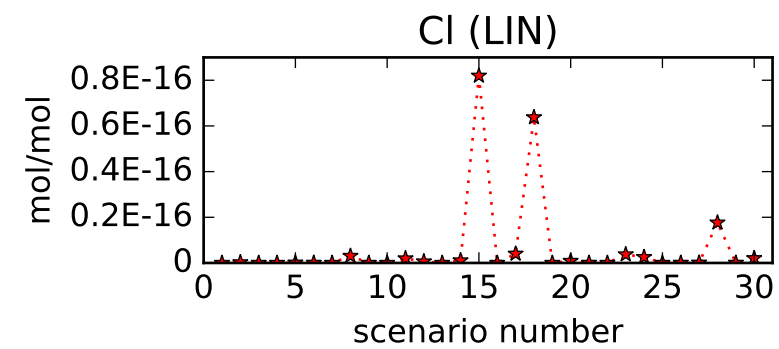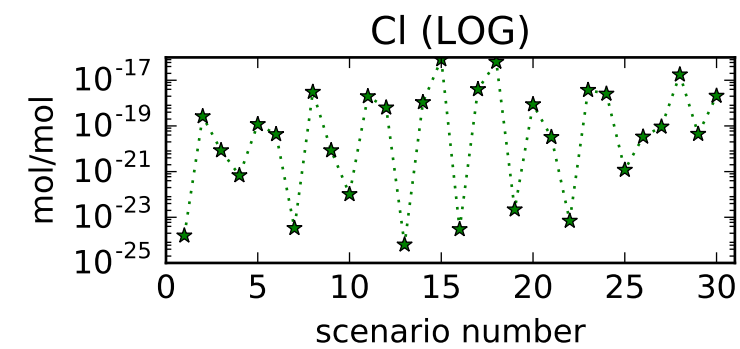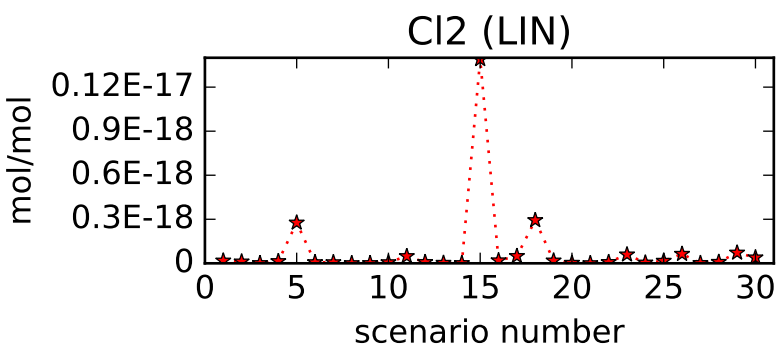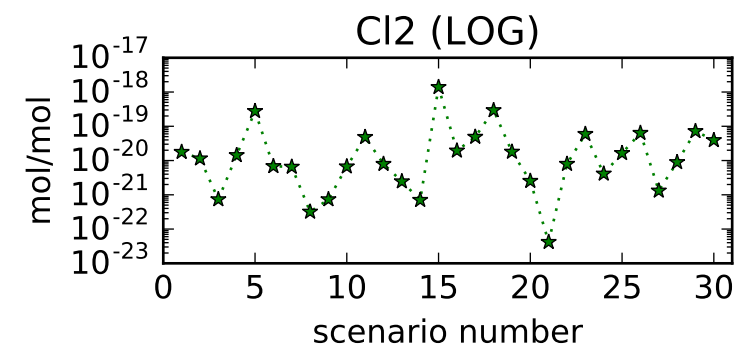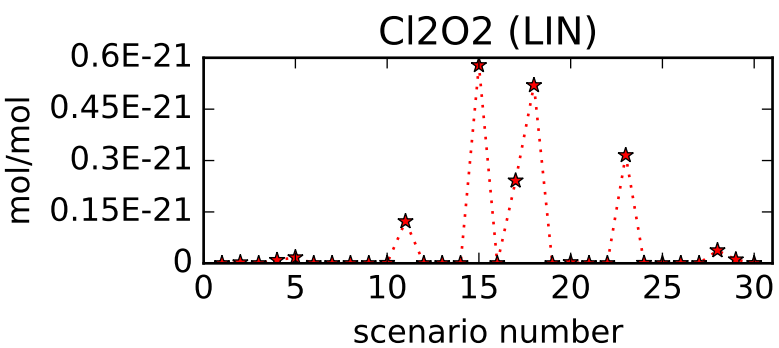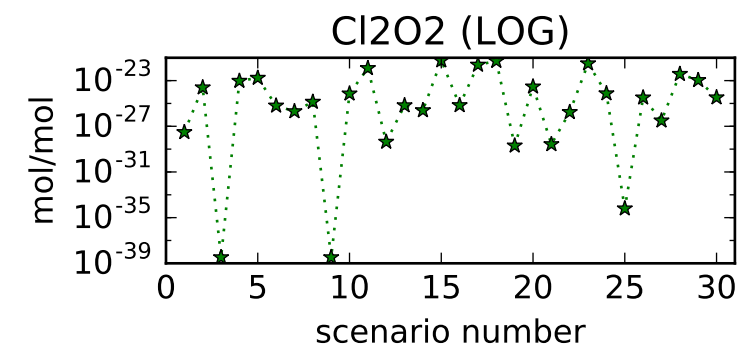

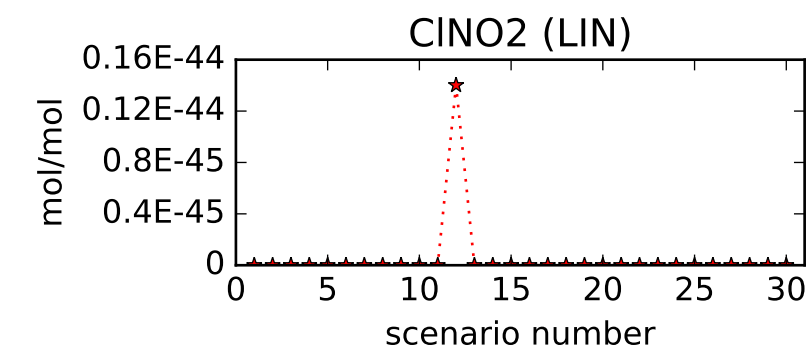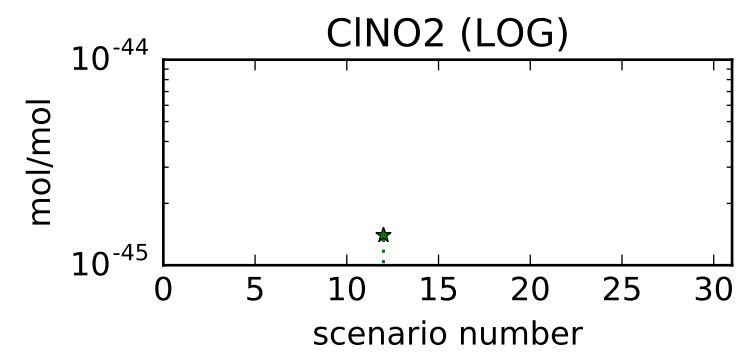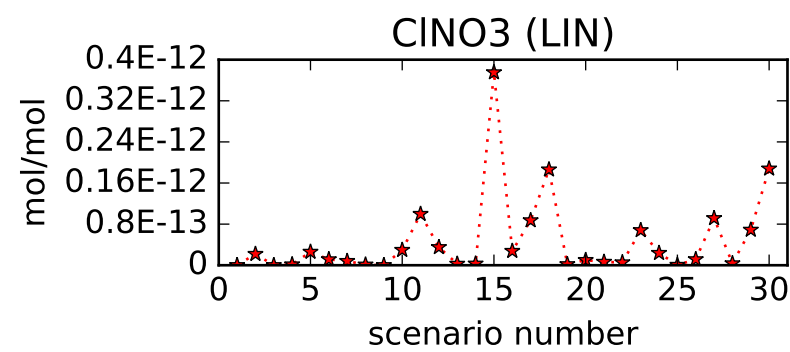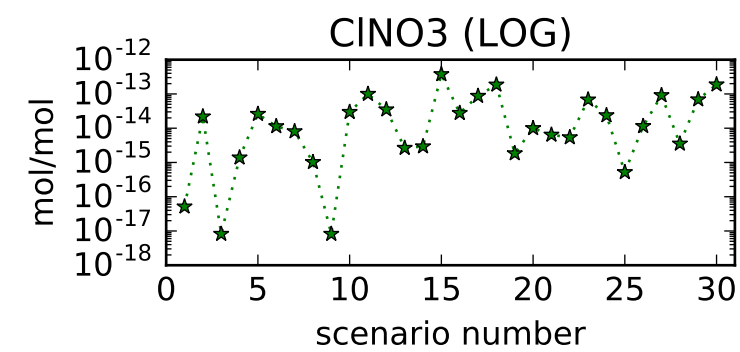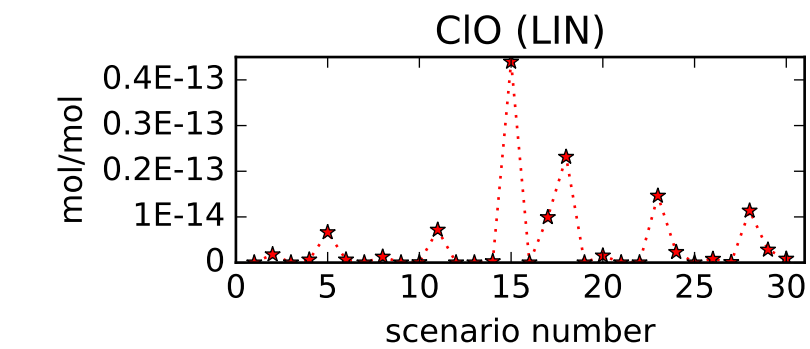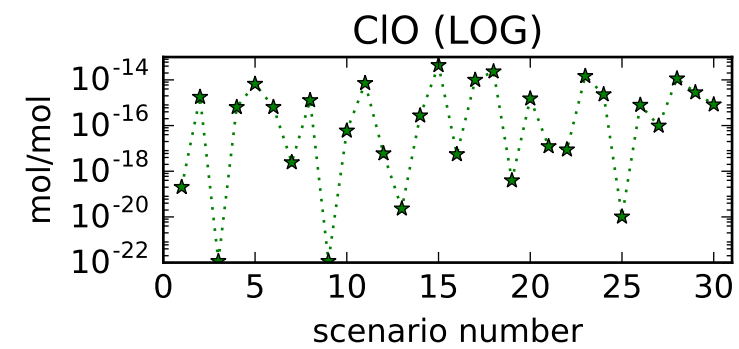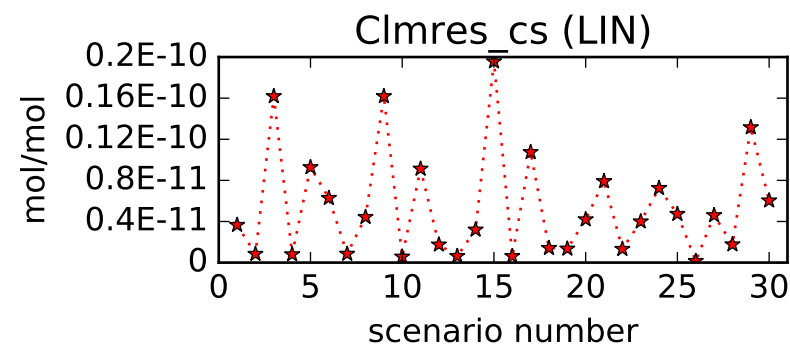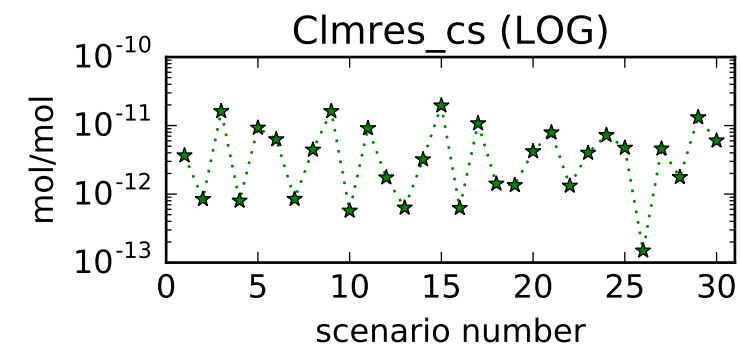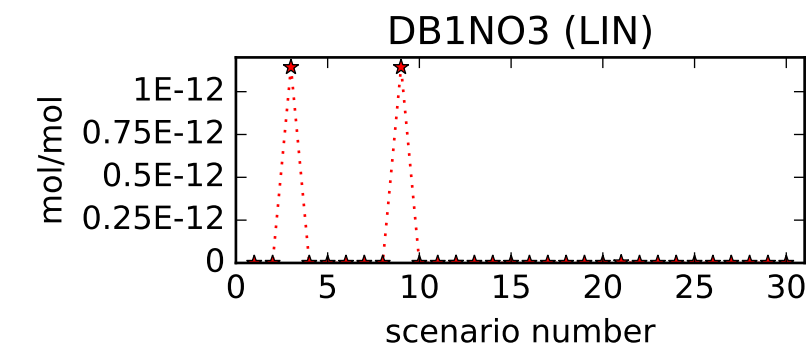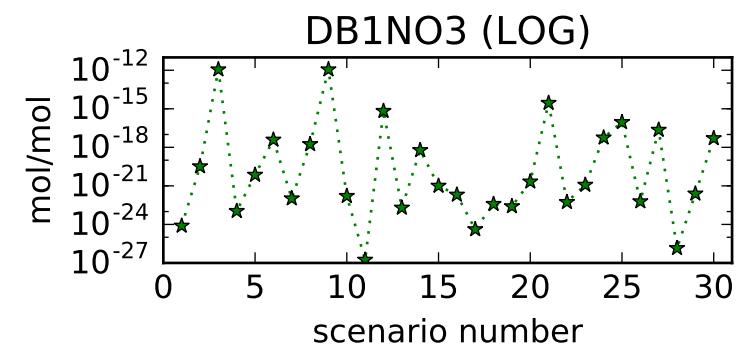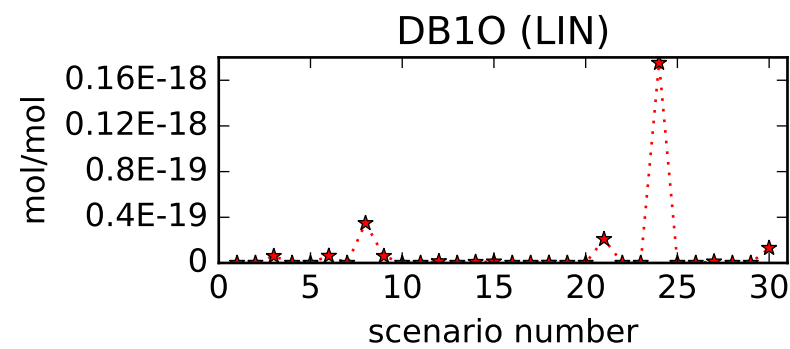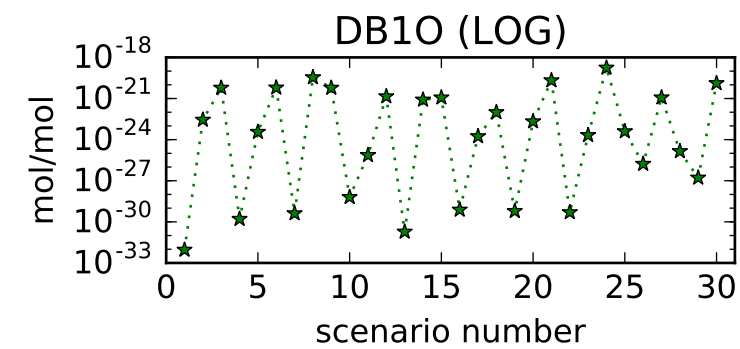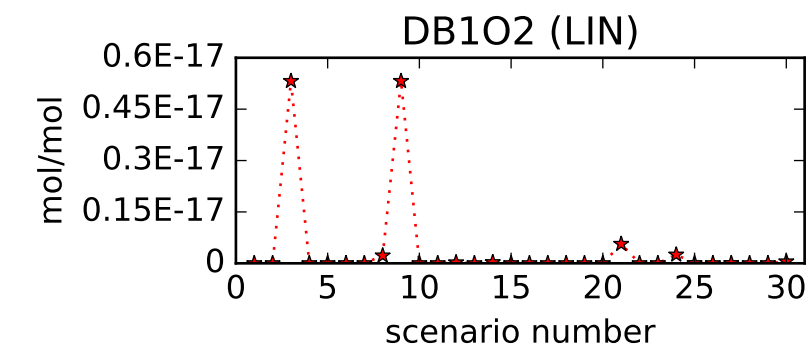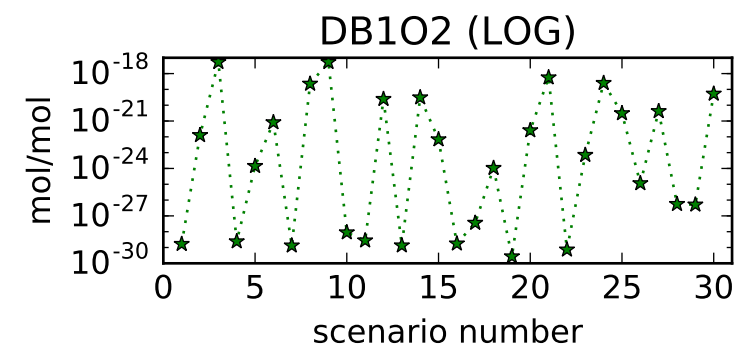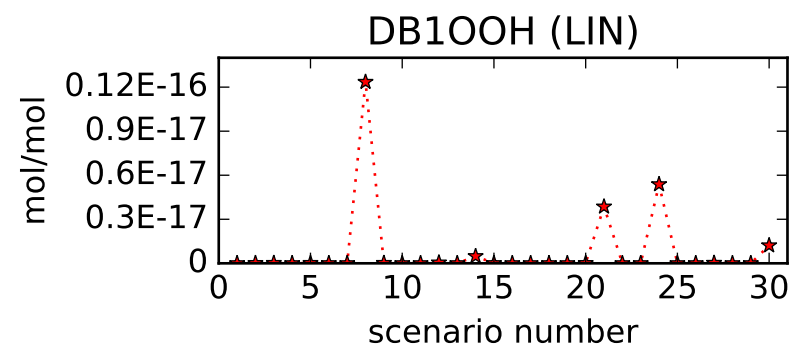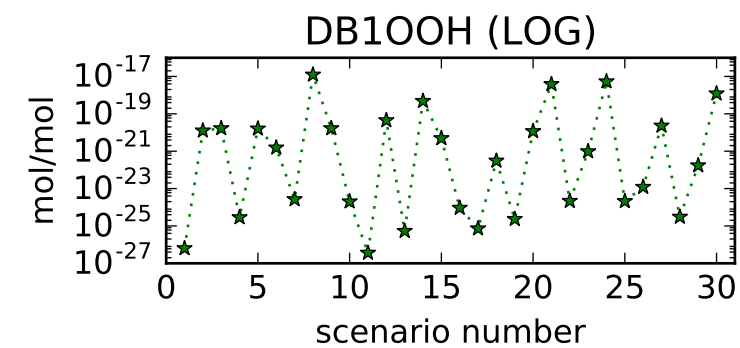

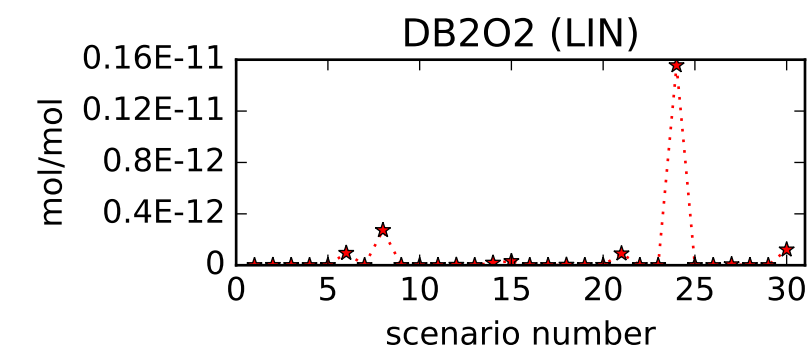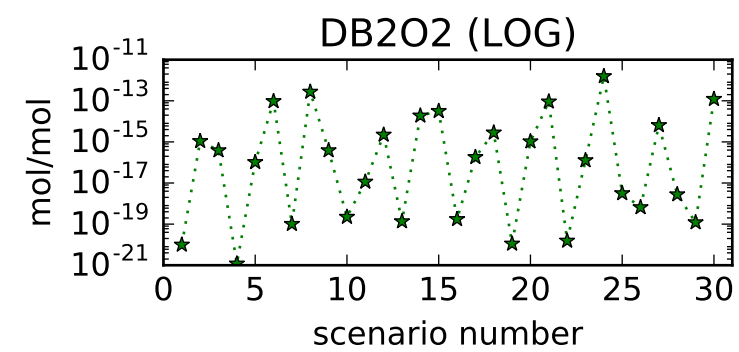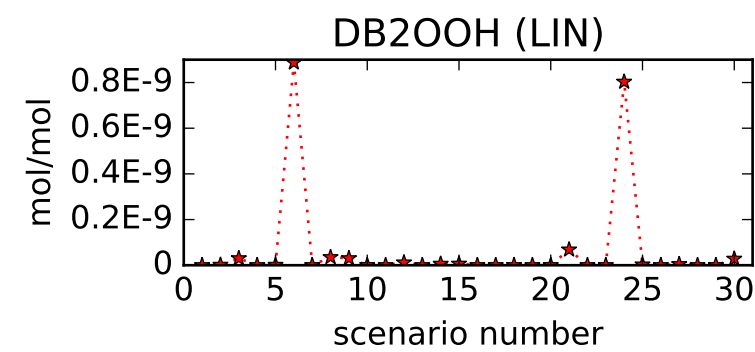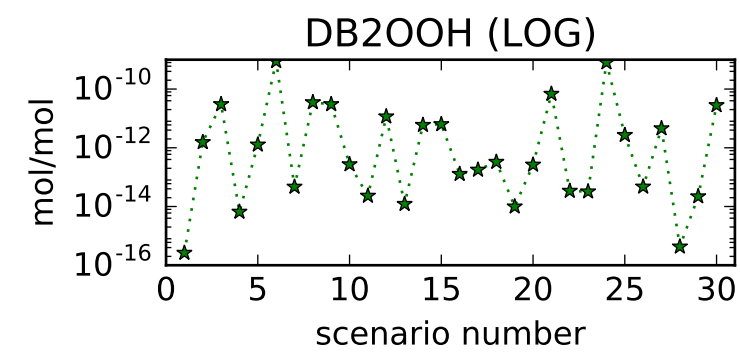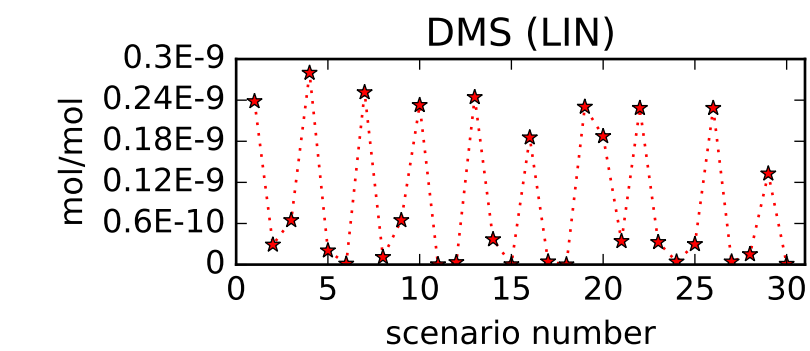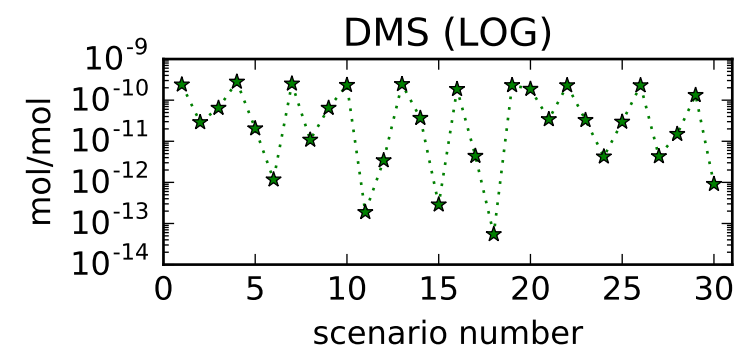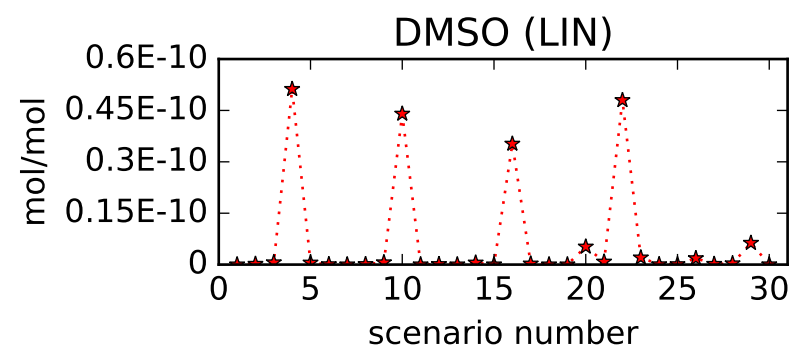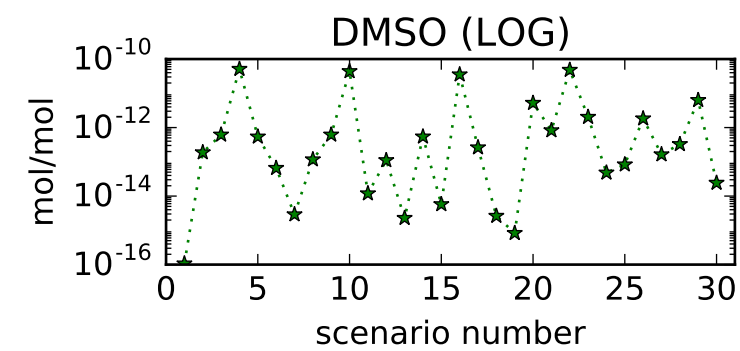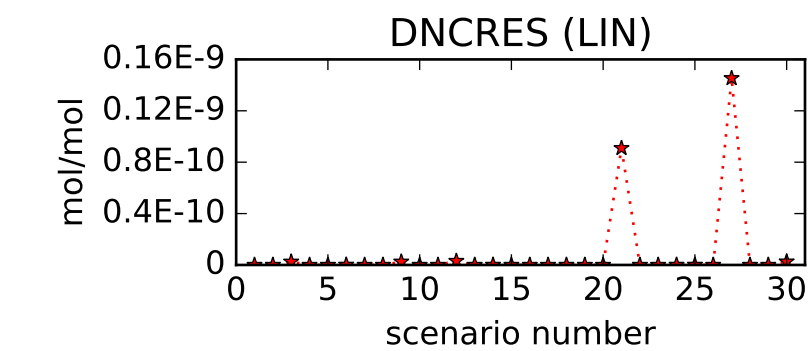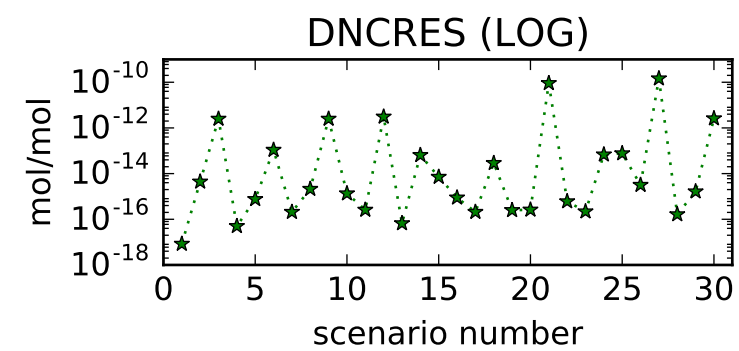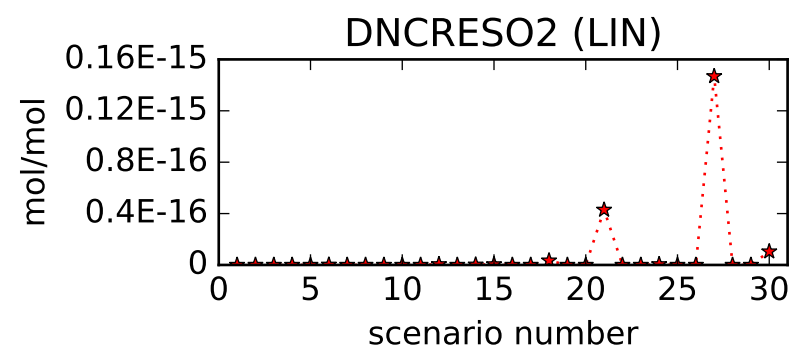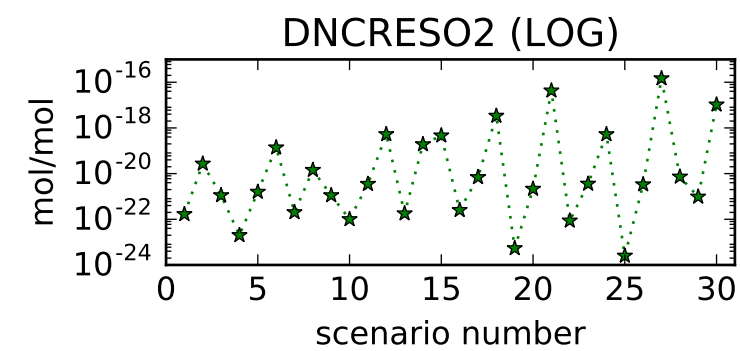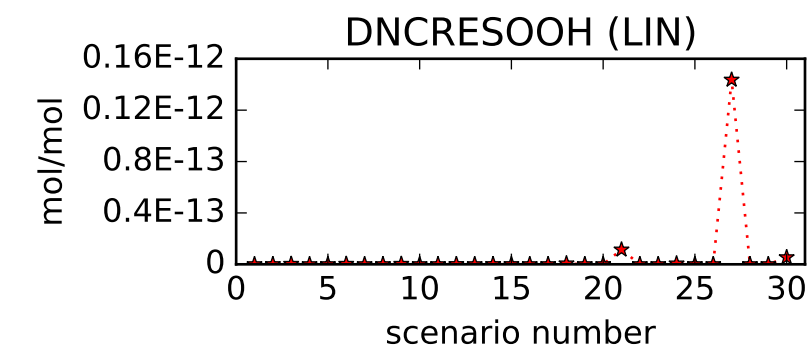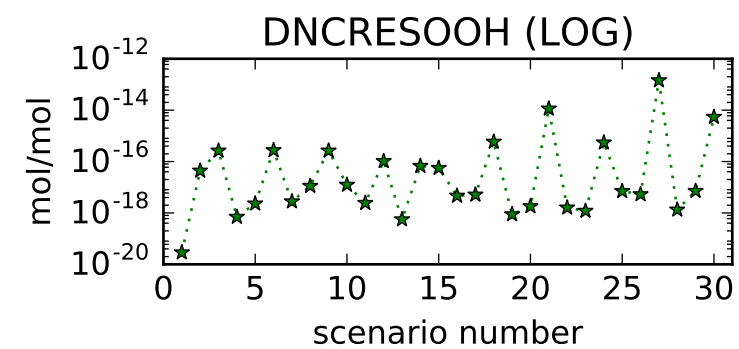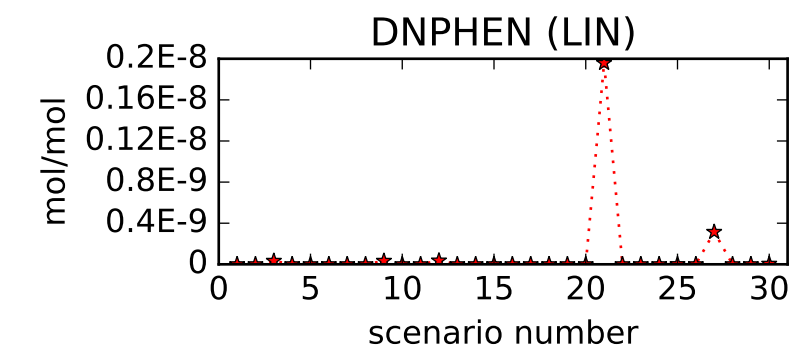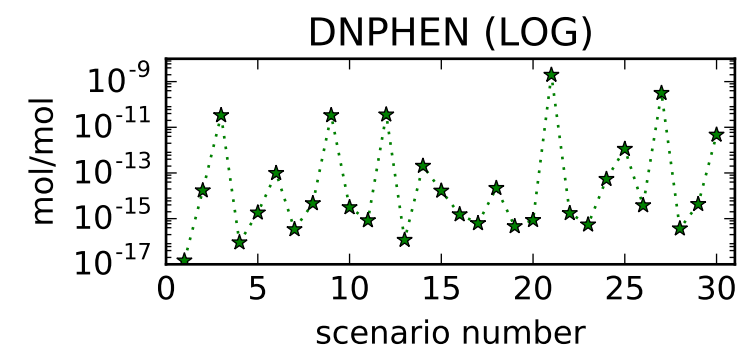



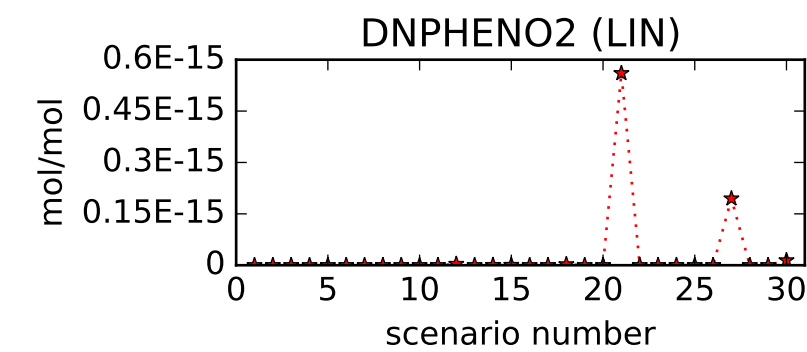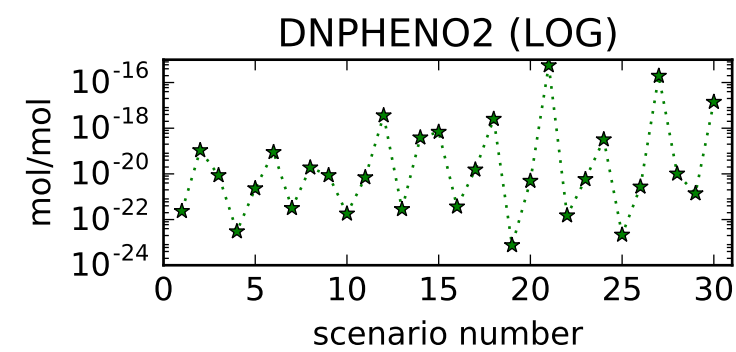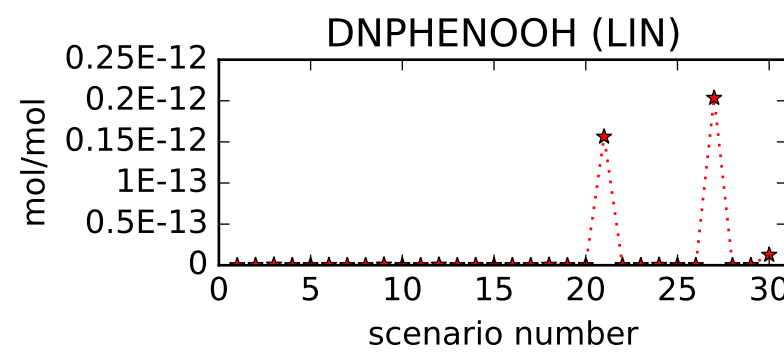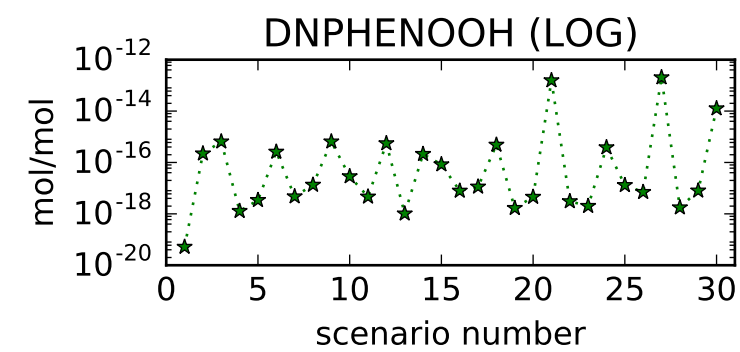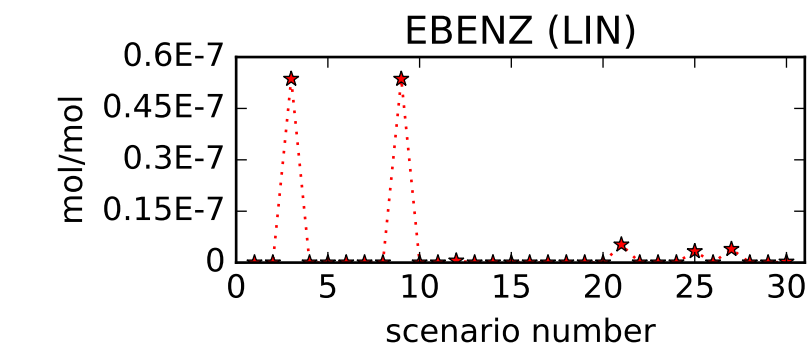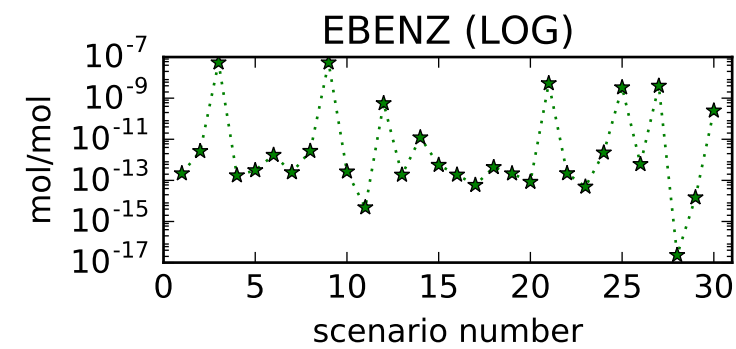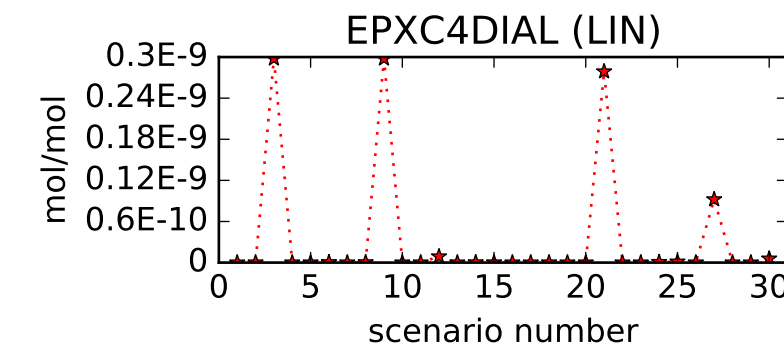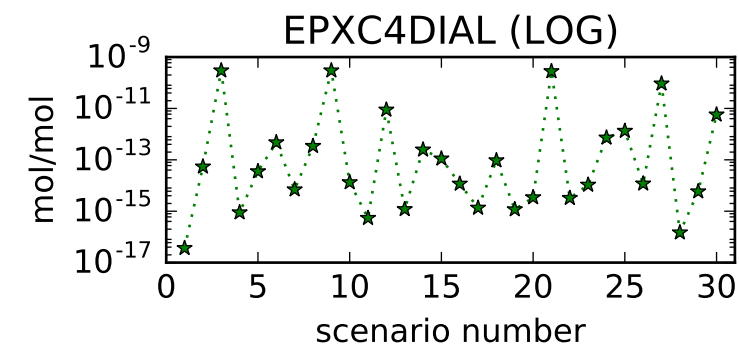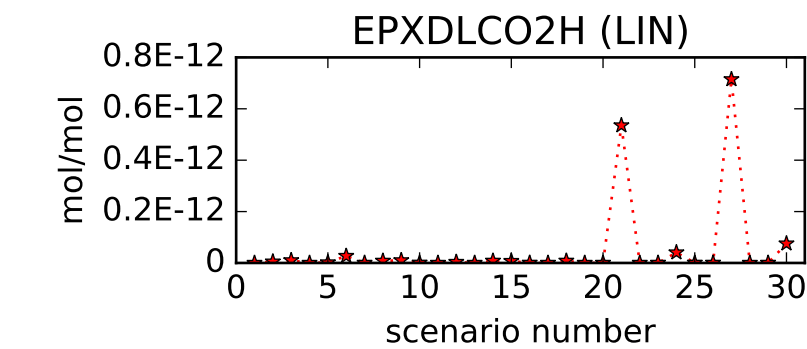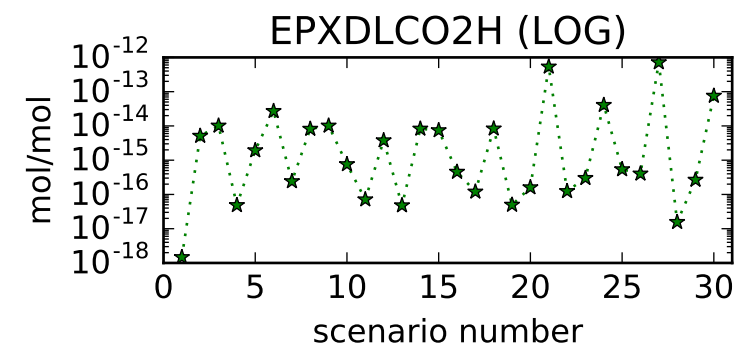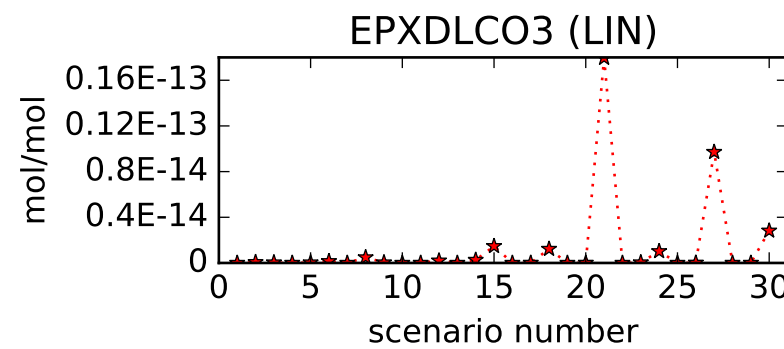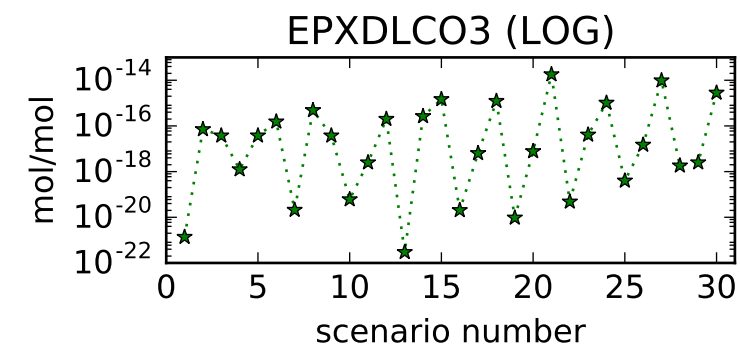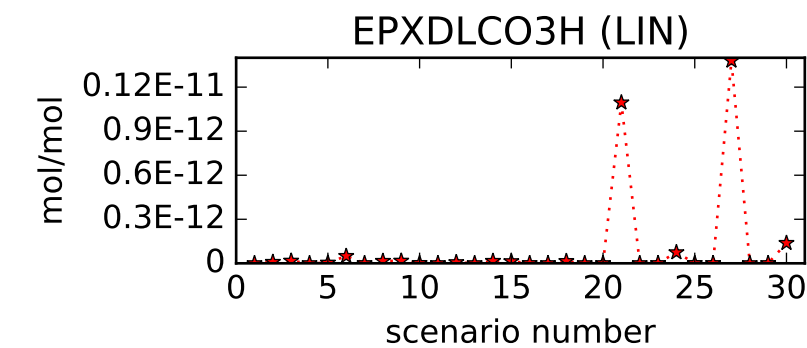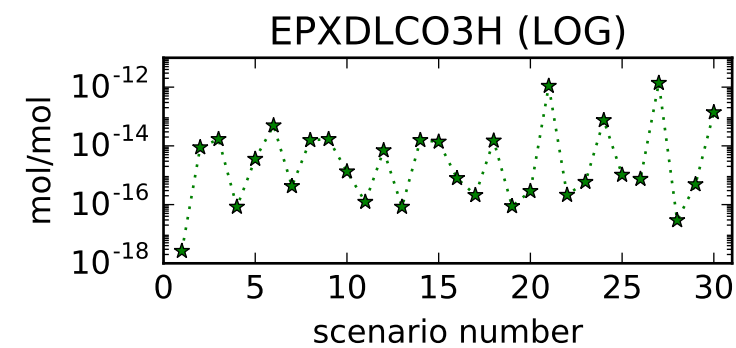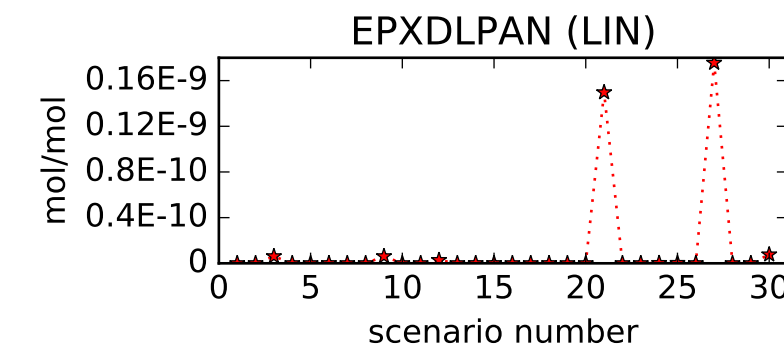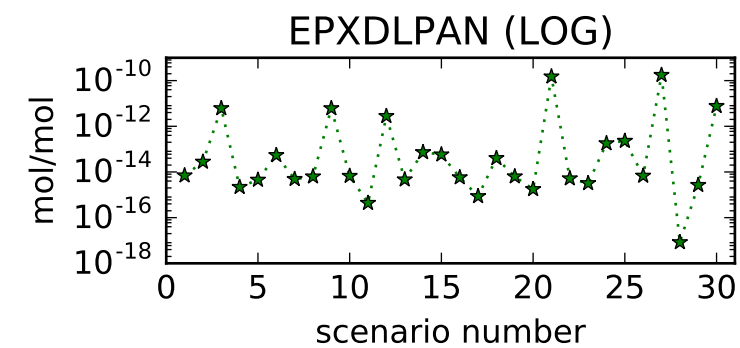

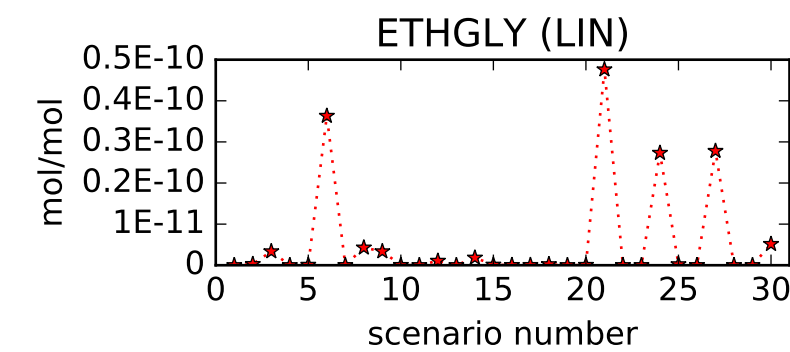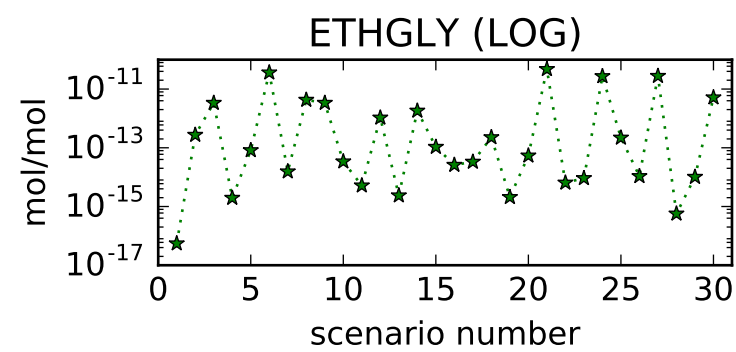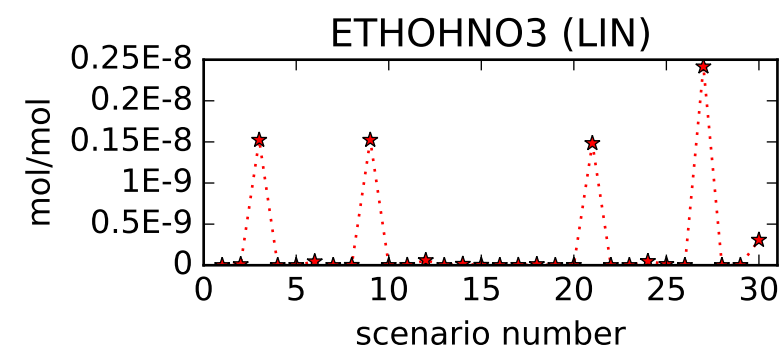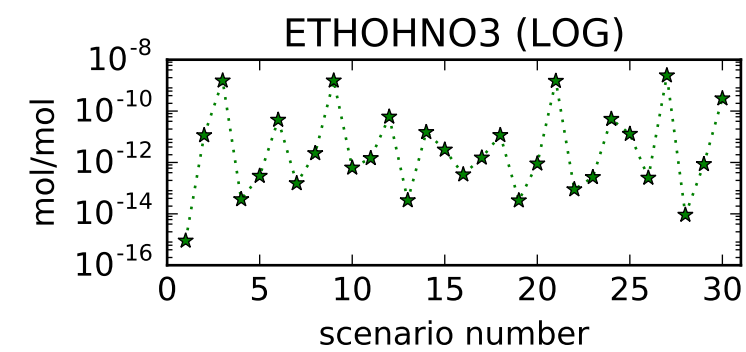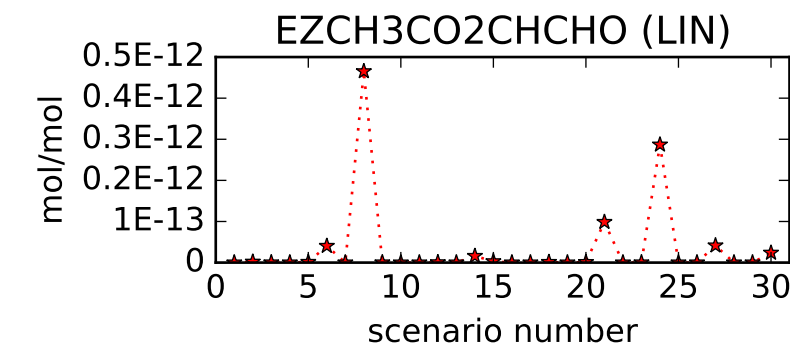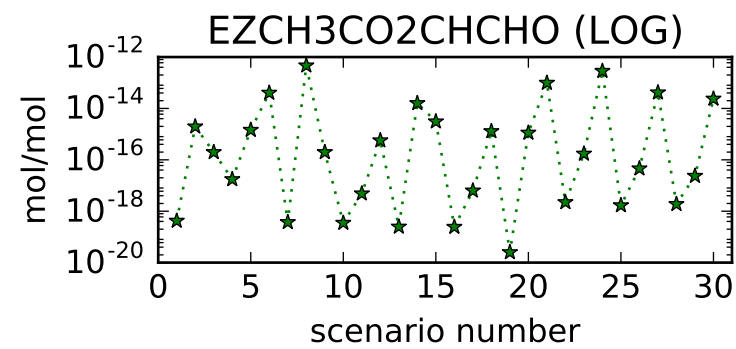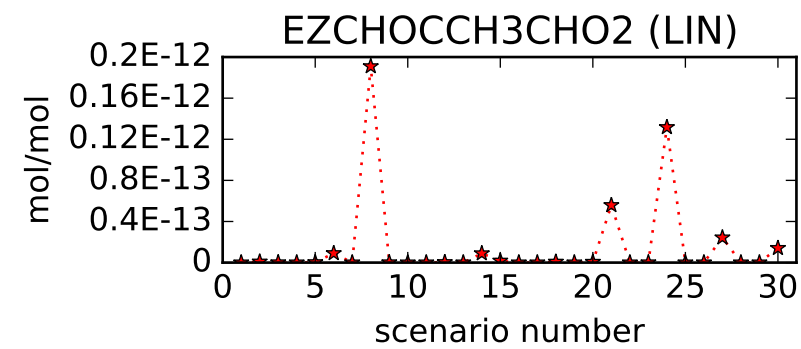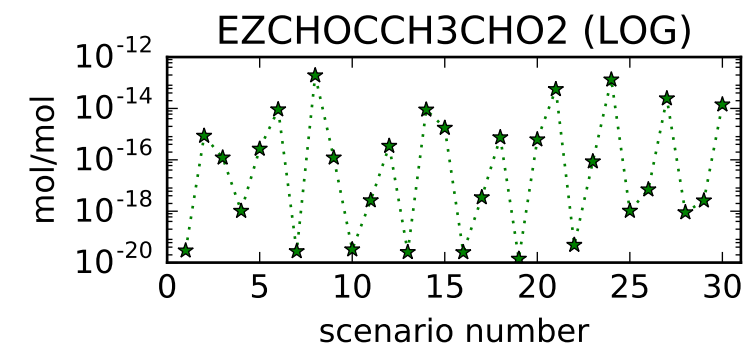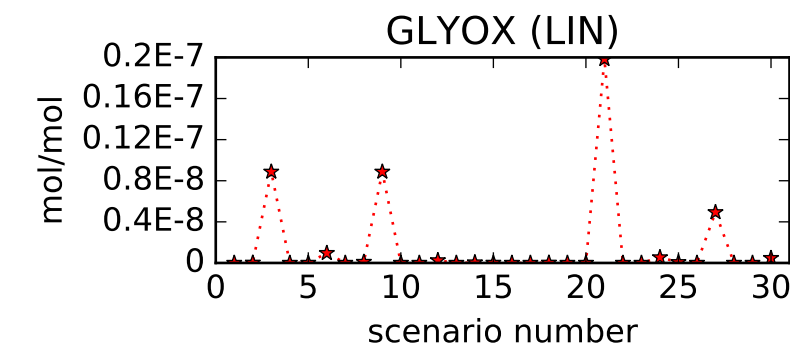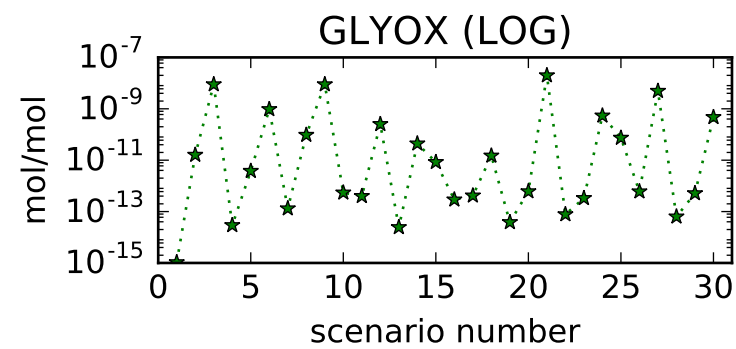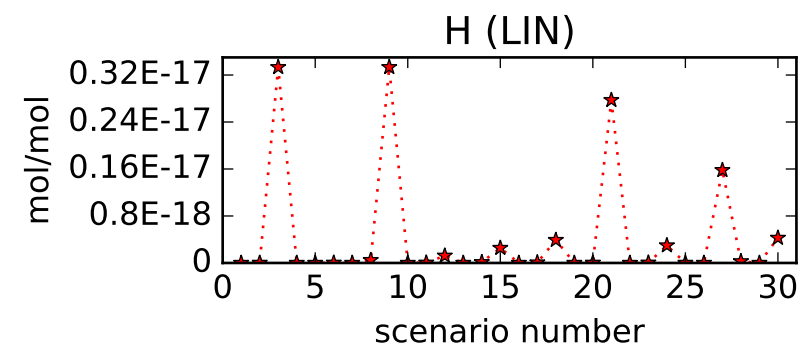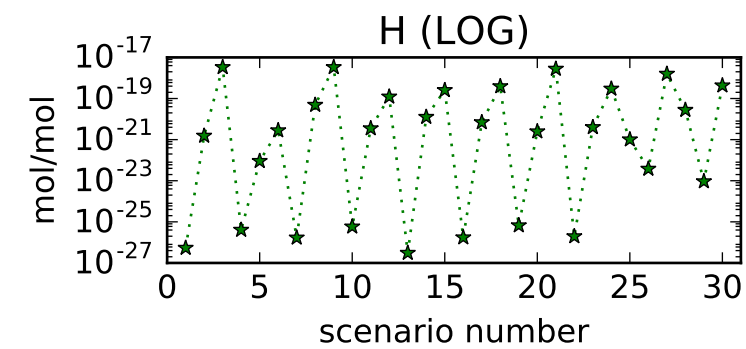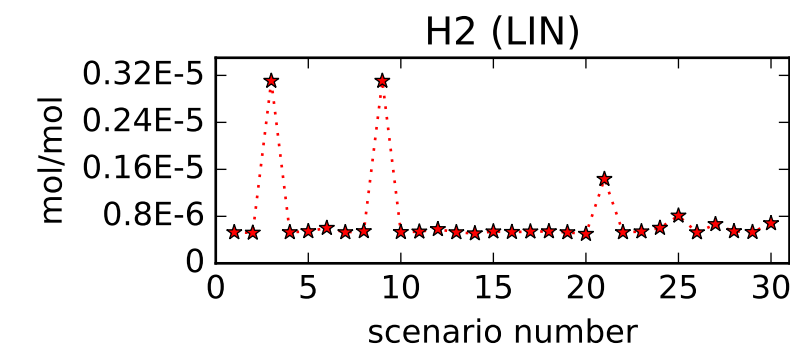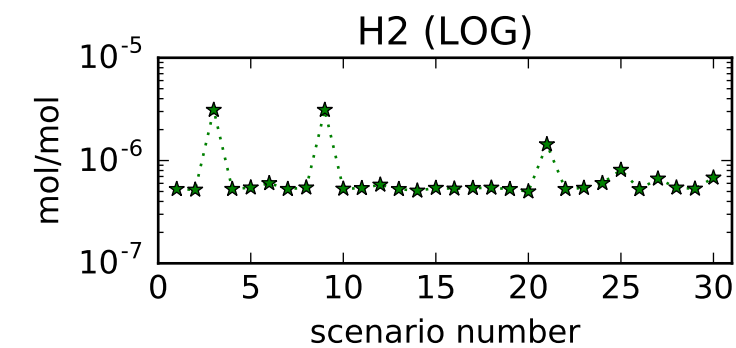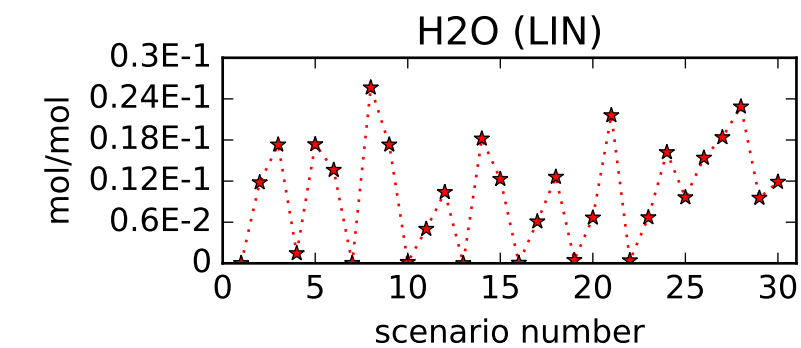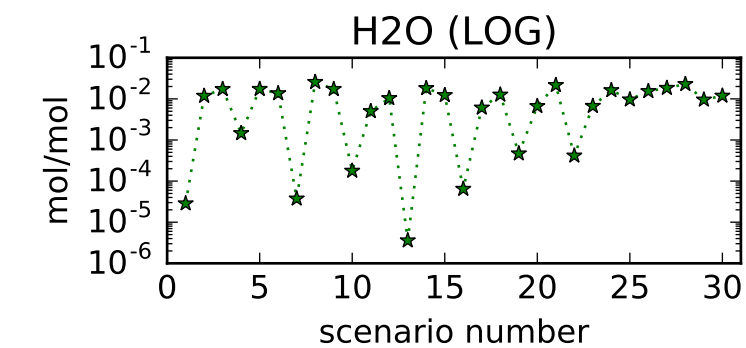

H2O2 (LIN)

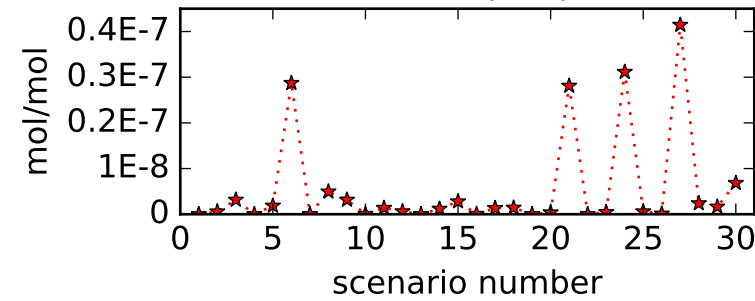

H2O2 (LOG)

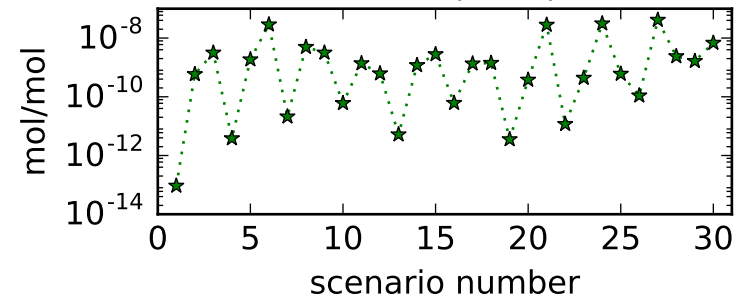

H2OH2O (LIN)

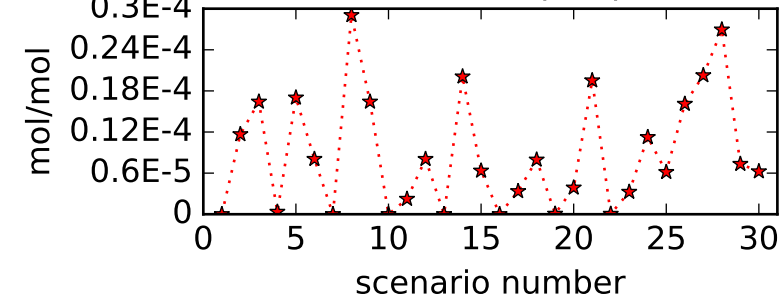

H2OH2O (LOG)

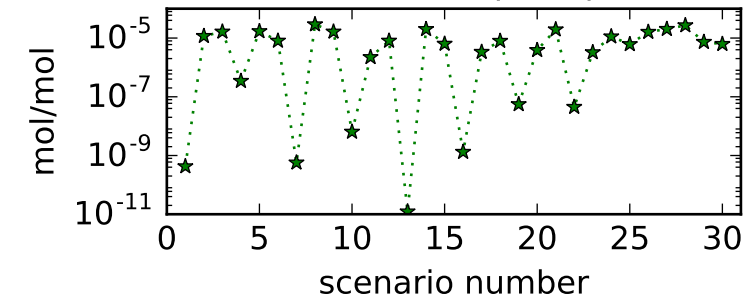

H2SO4 (LIN)

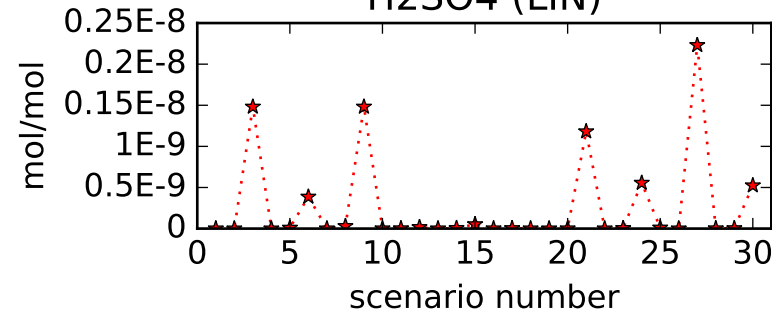

H2SO4 (LOG)

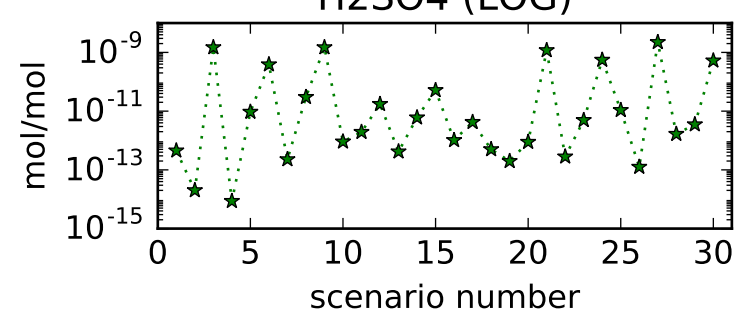

HBr (LIN)

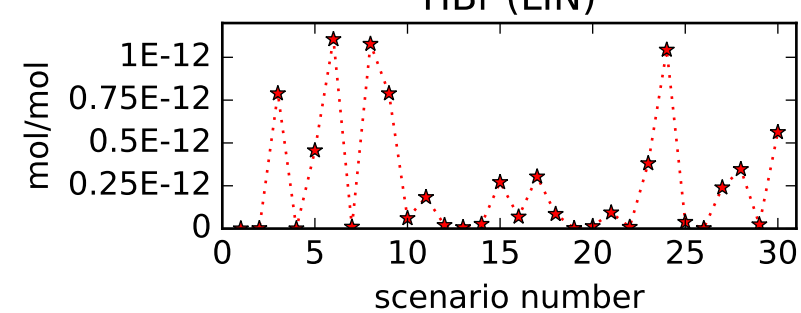

HBr (LOG)

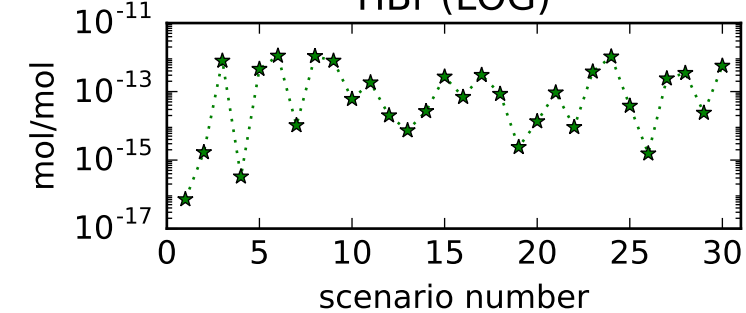

HCHO (LIN)

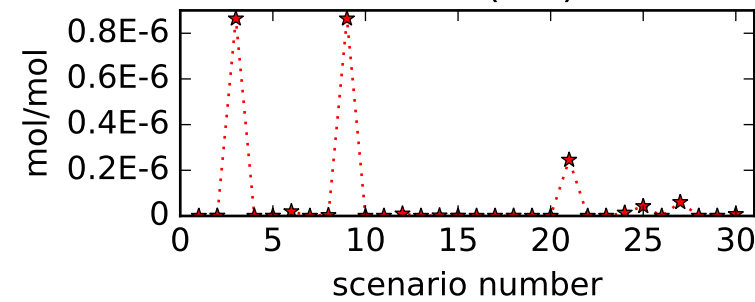

HCHO (LOG)

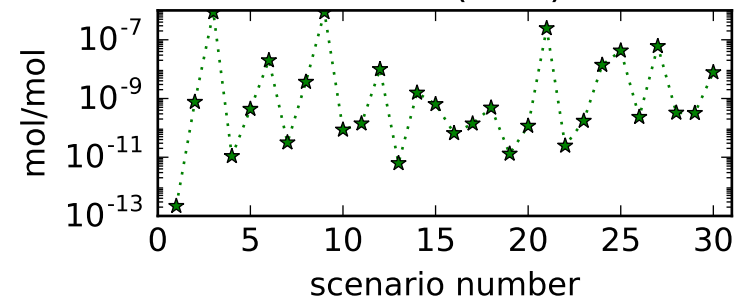

HCN (LIN)

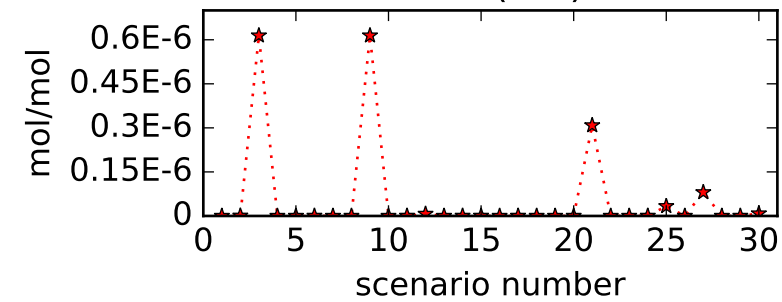

HCN (LOG)

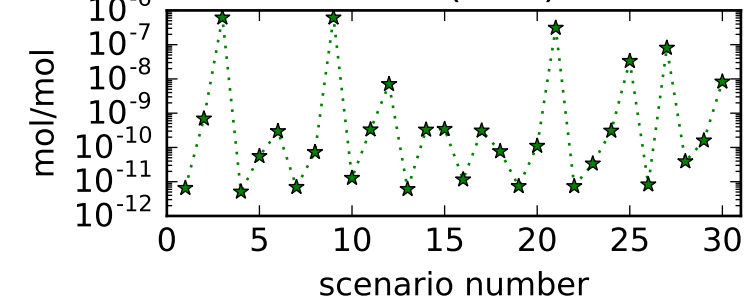

HCOC5 (LIN)

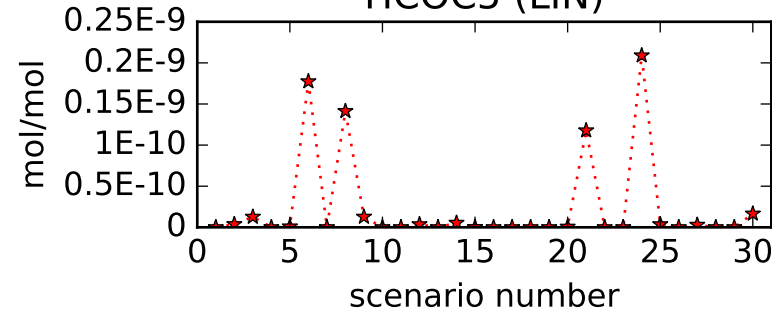

HCOC5 (LOG)

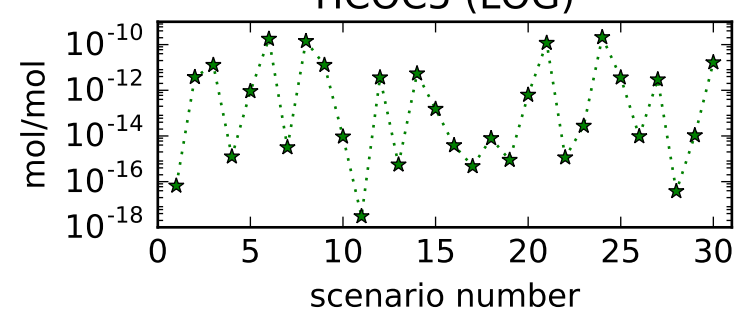

HCOCCH3CHOOH (LIN)

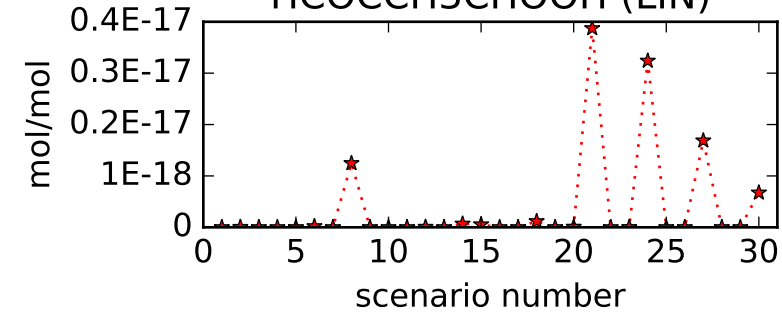

HCOCCH3CHOOH (LOG)

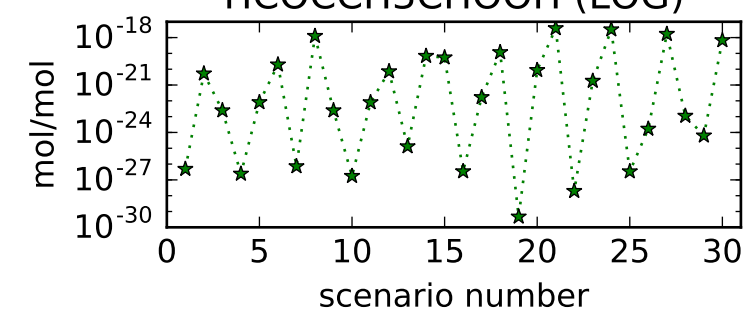

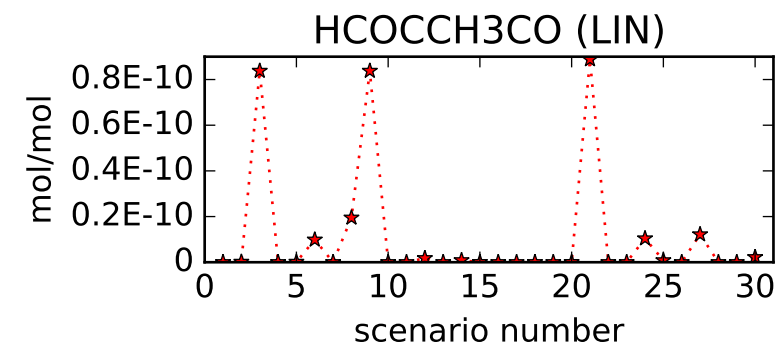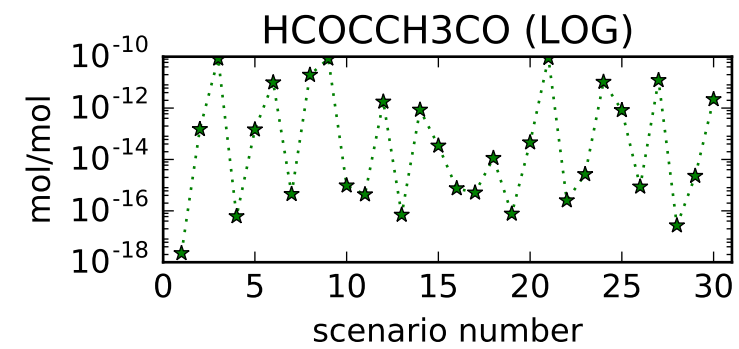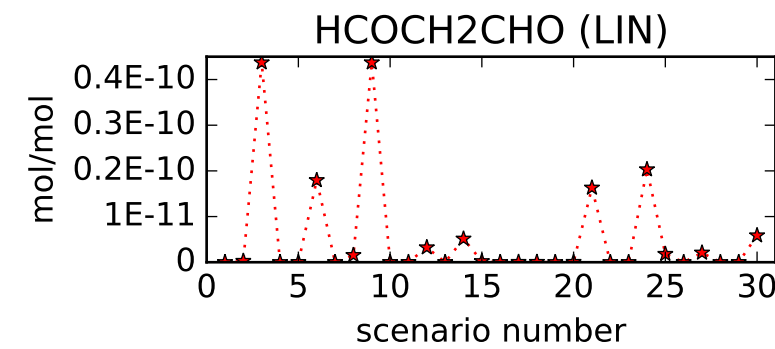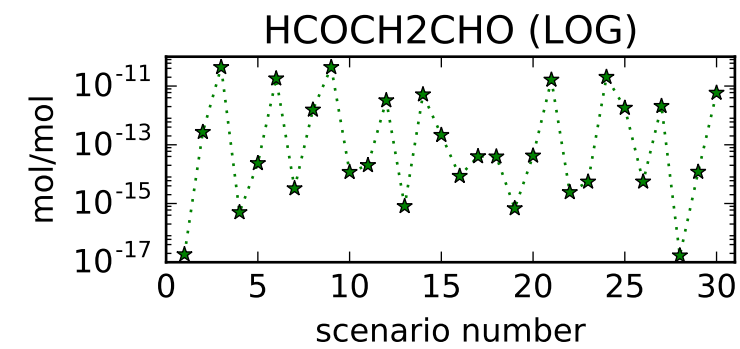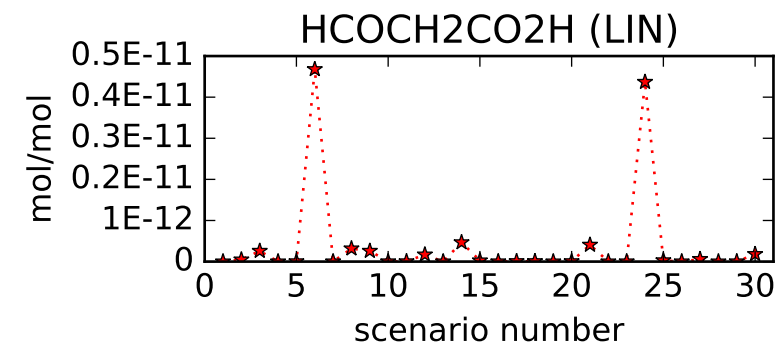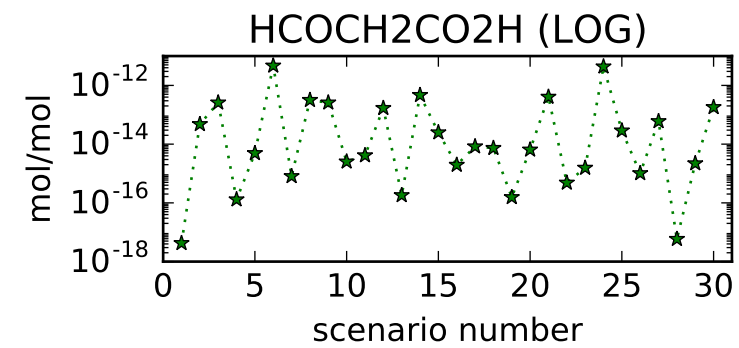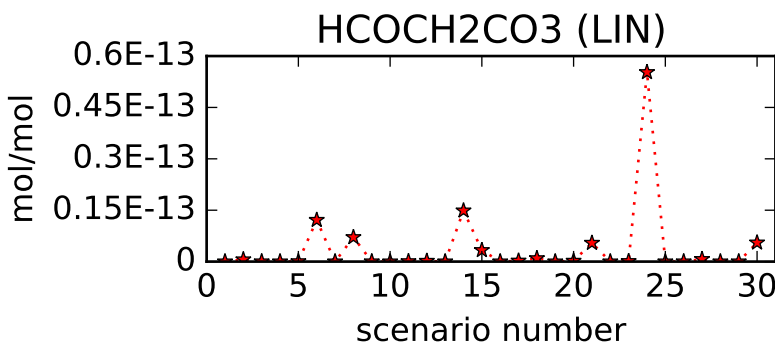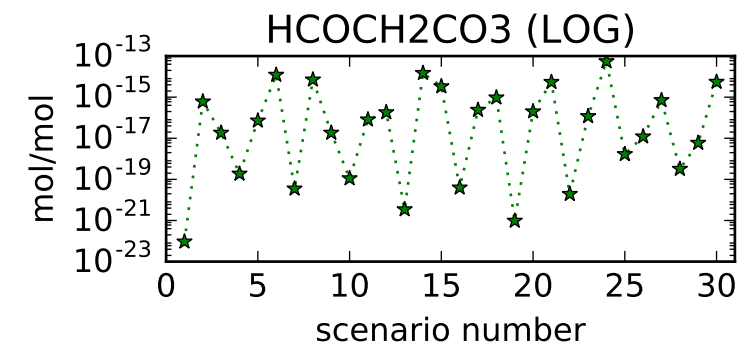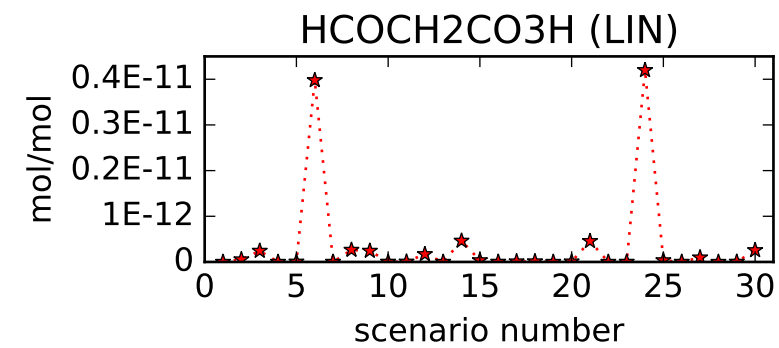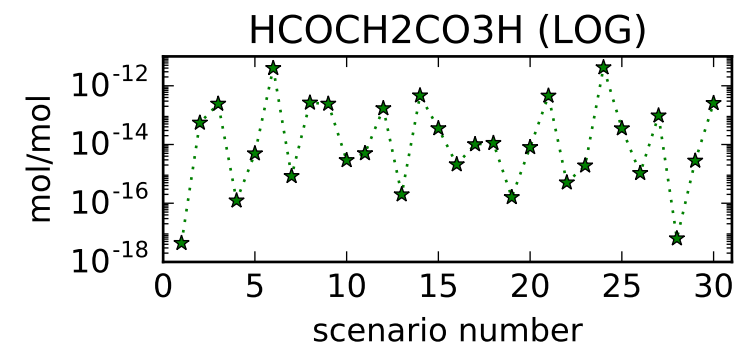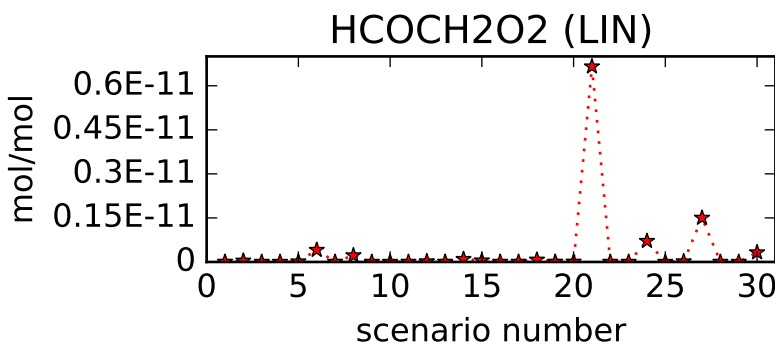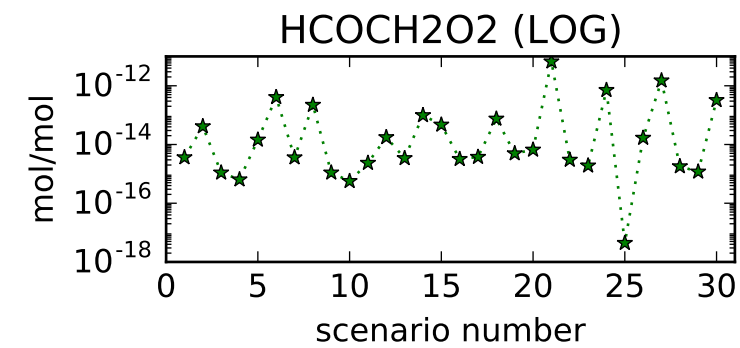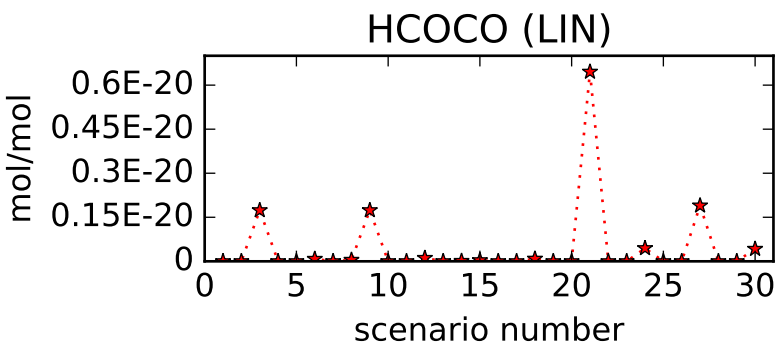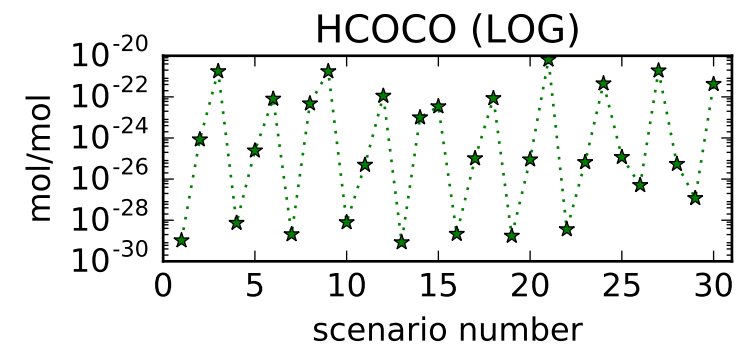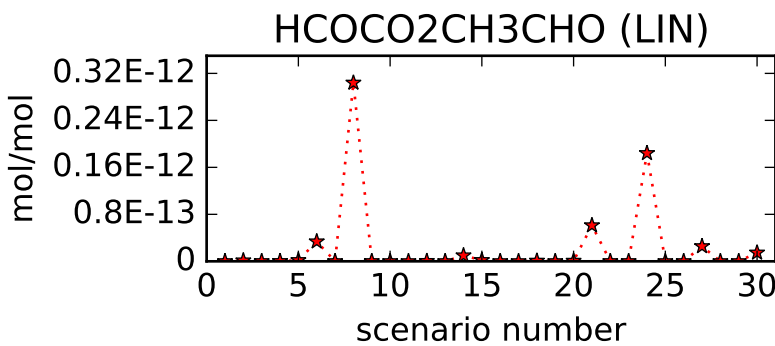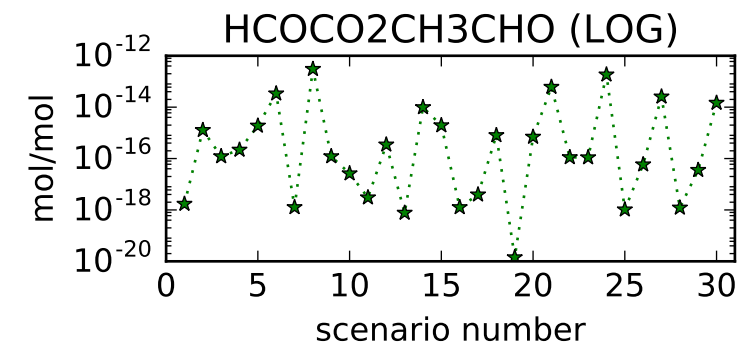

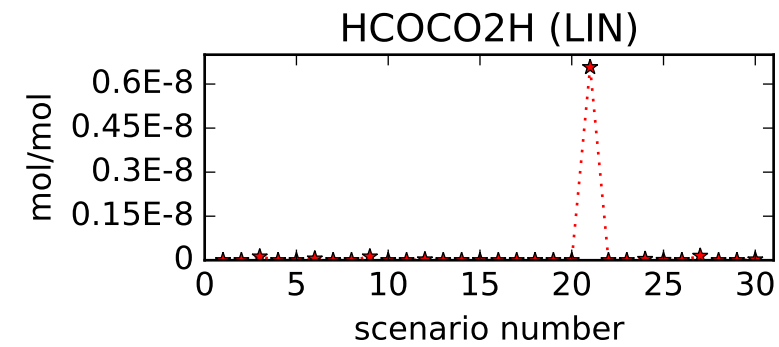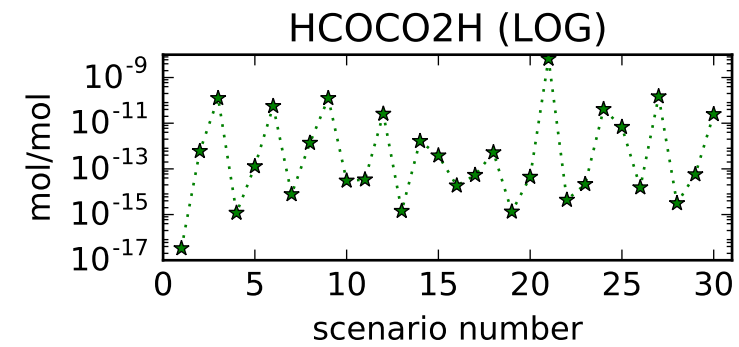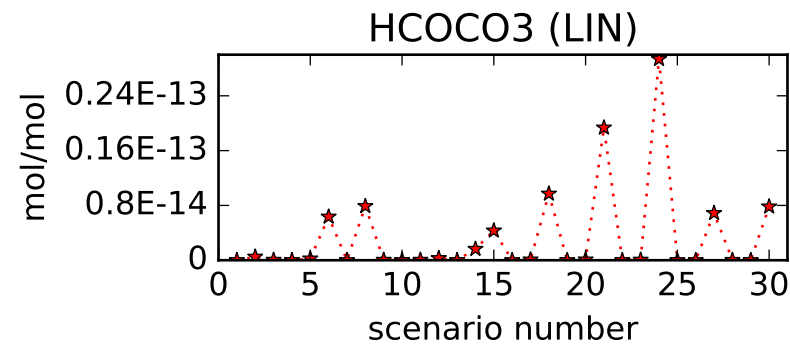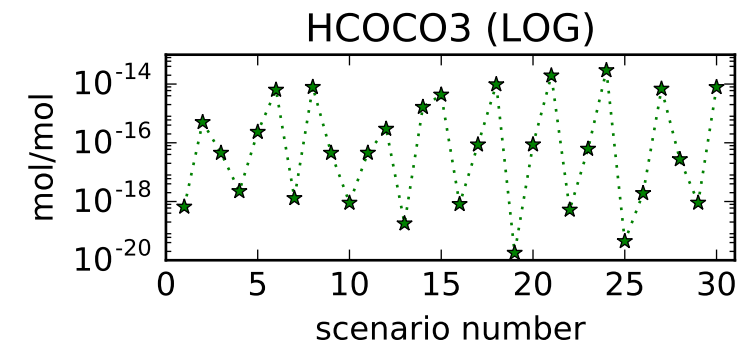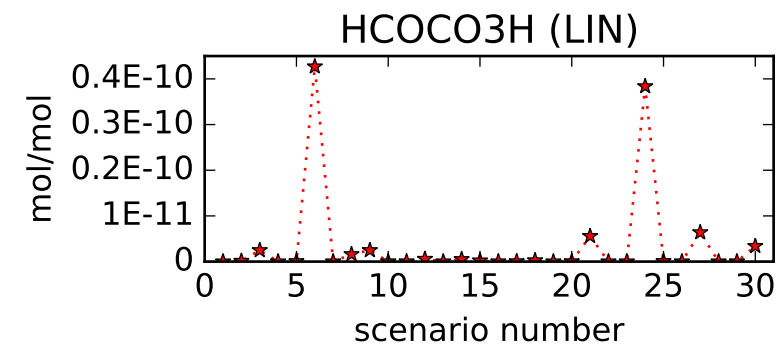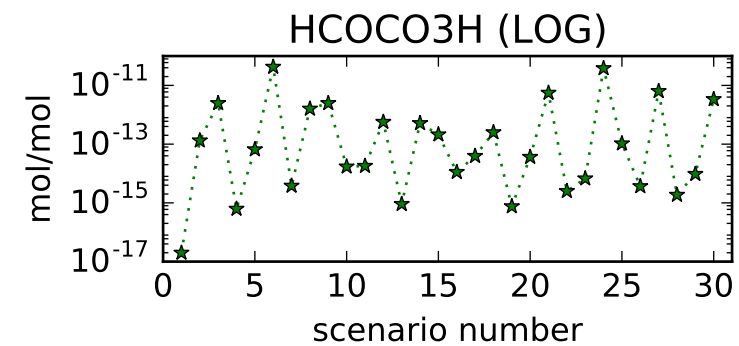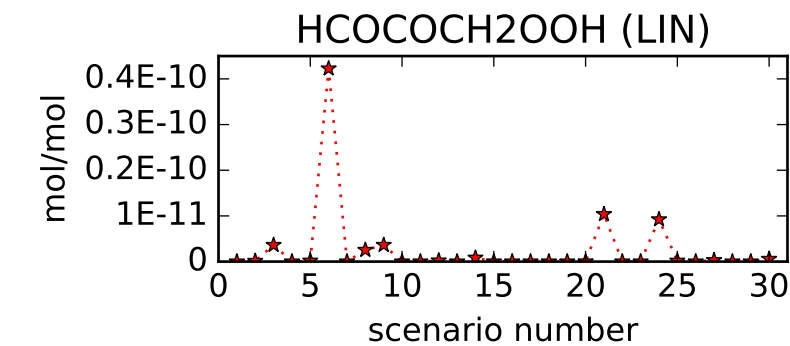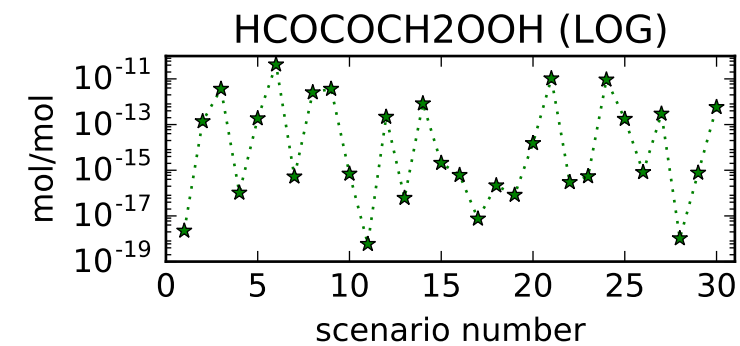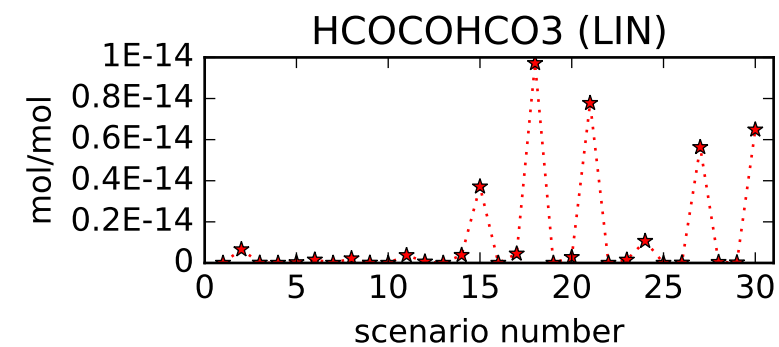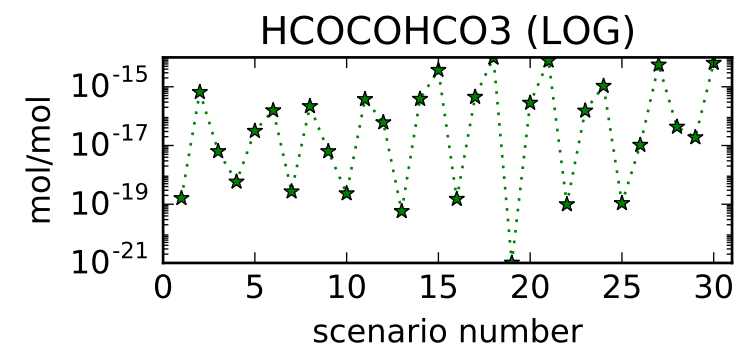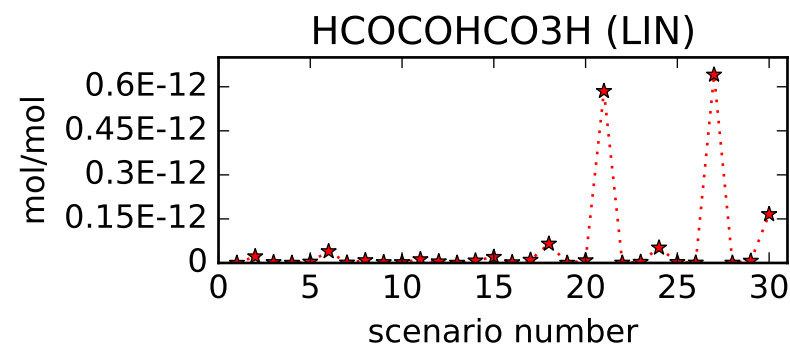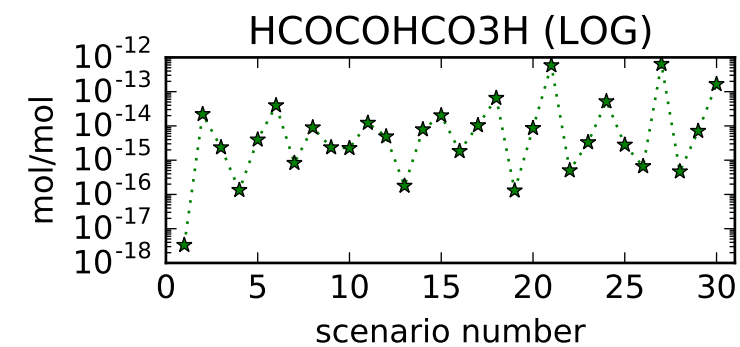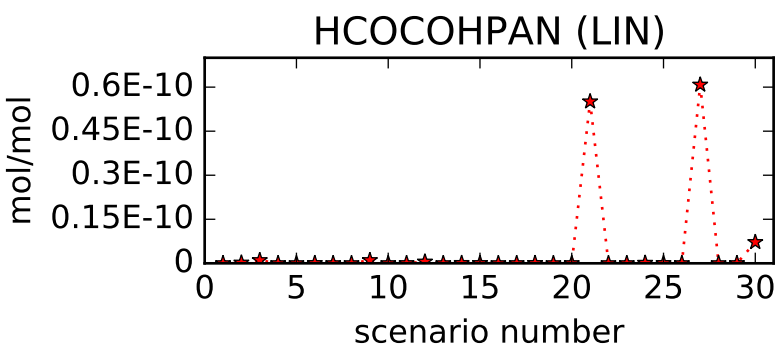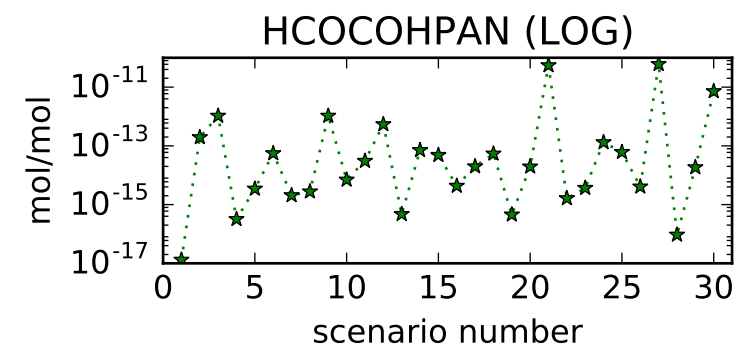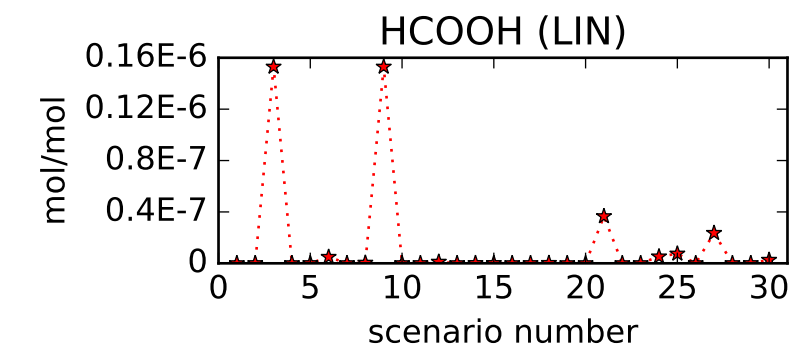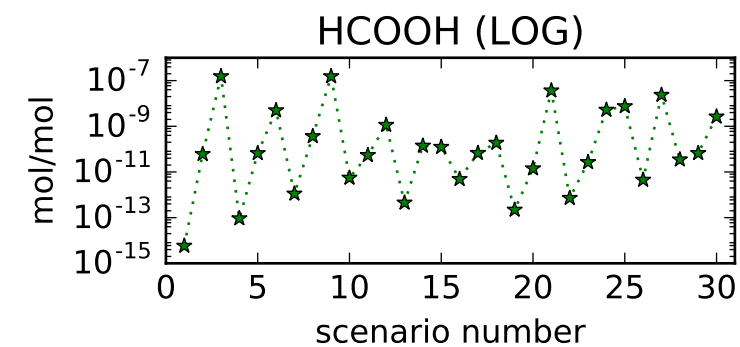



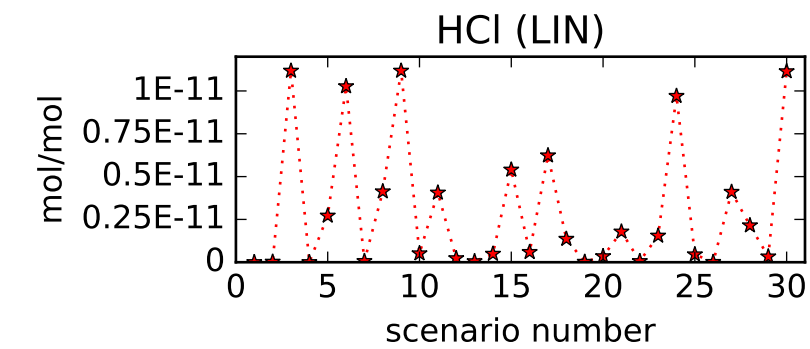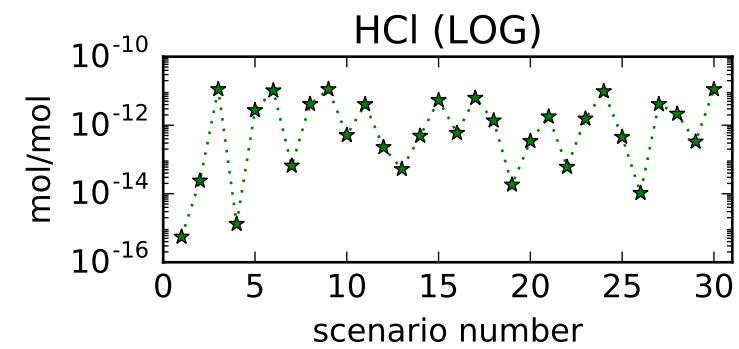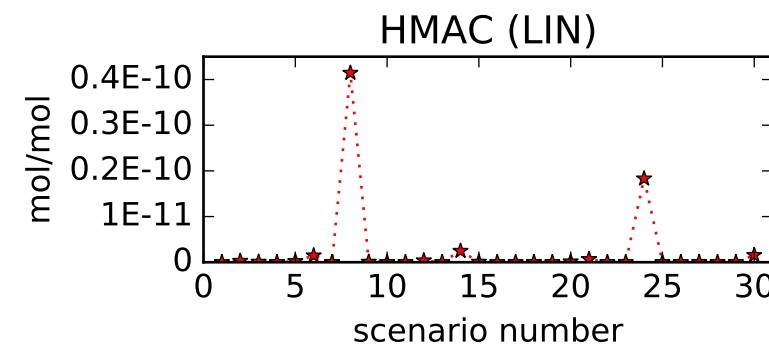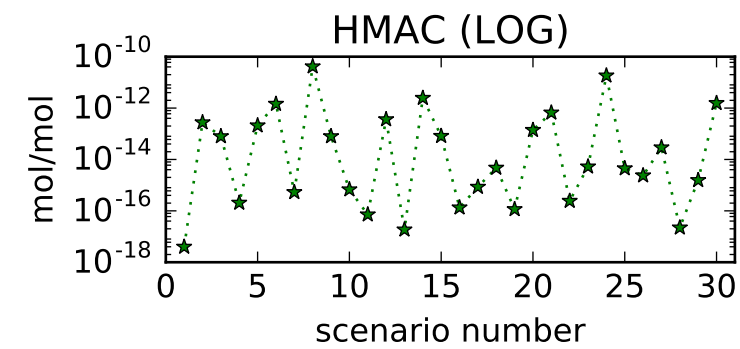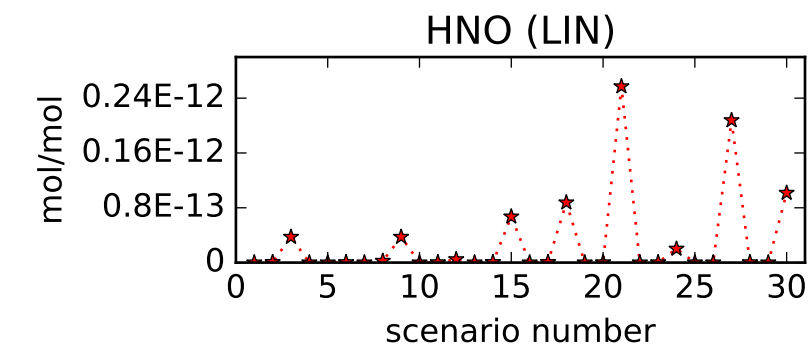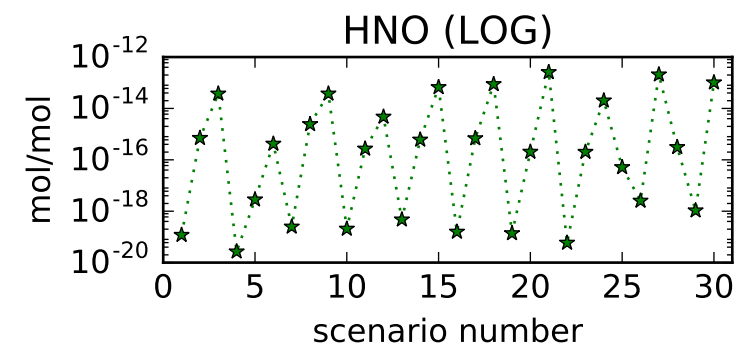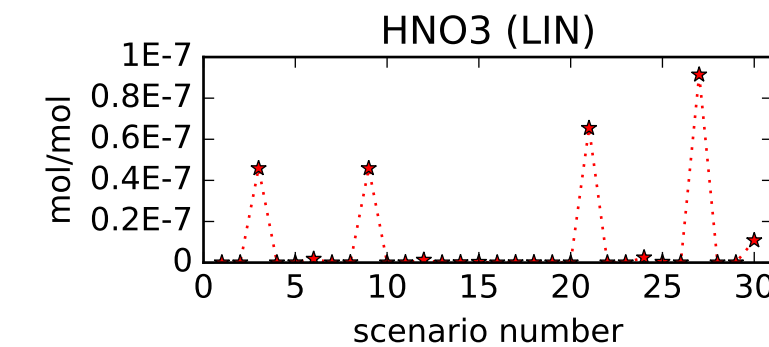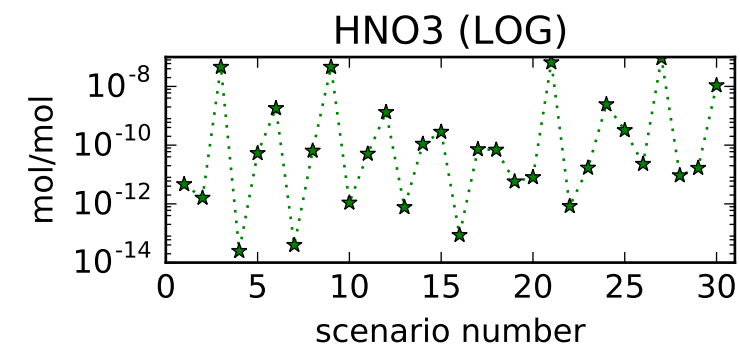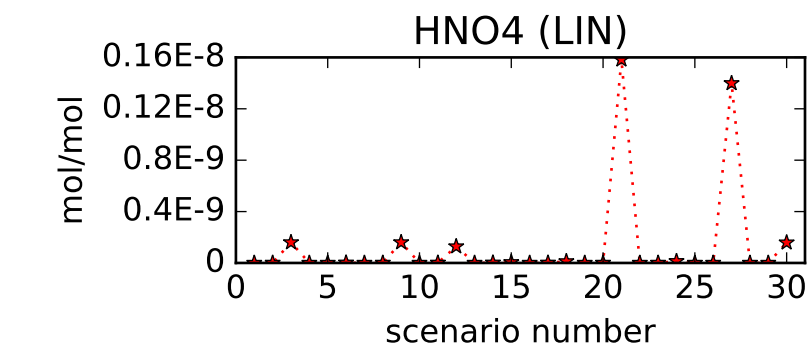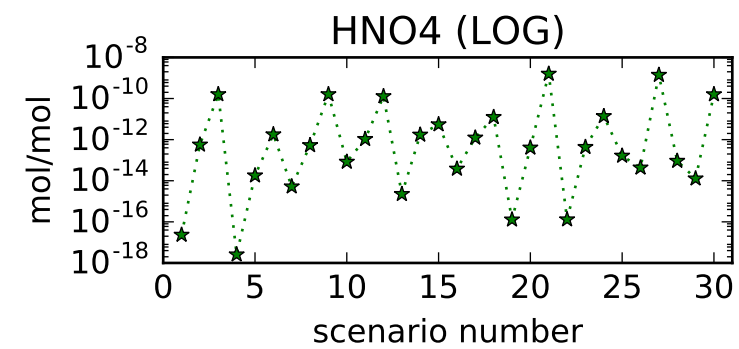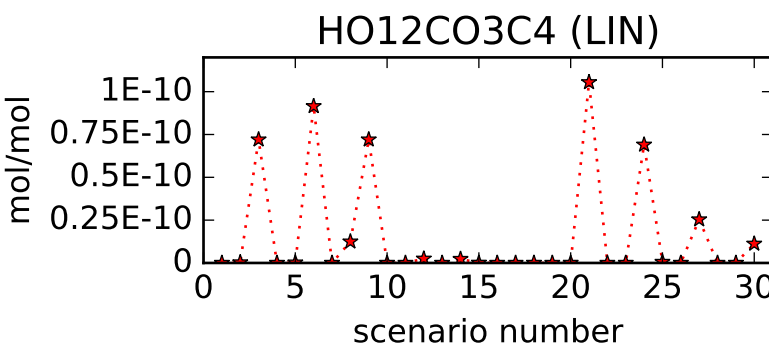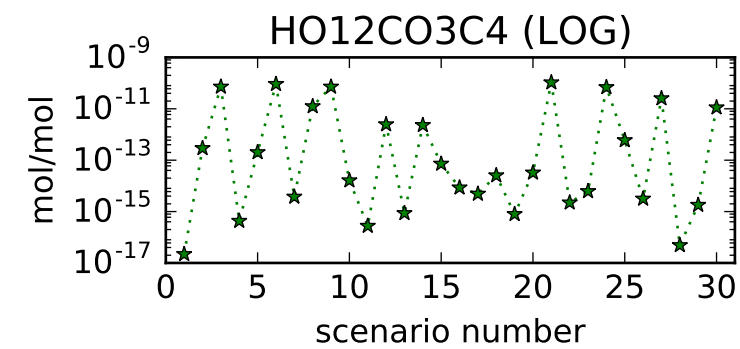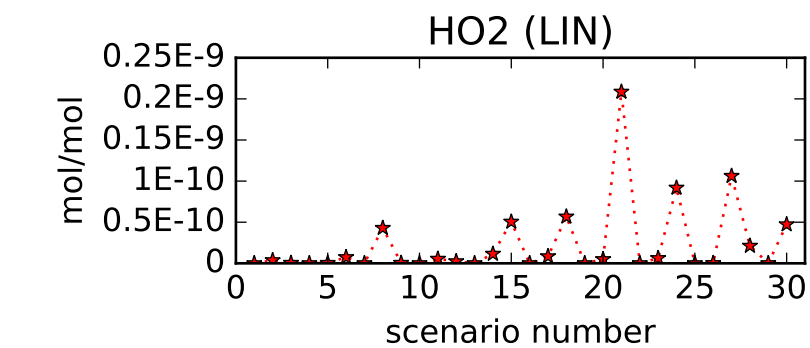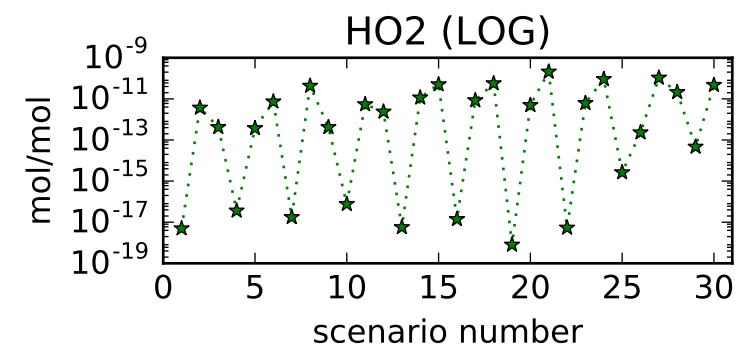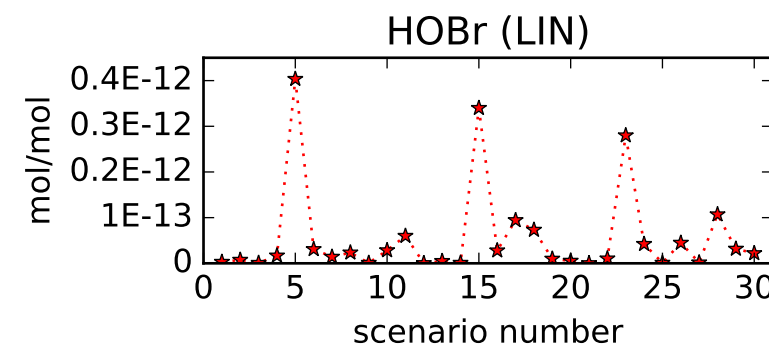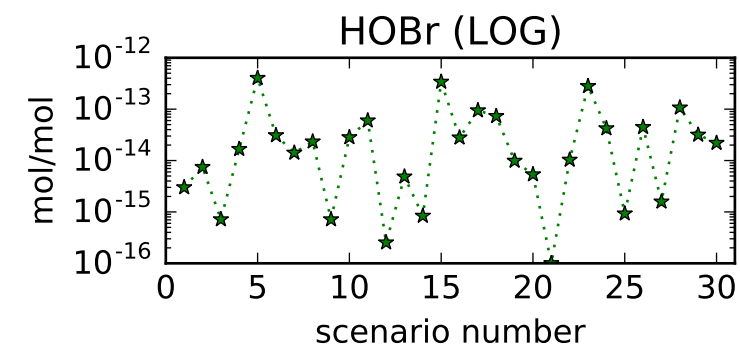

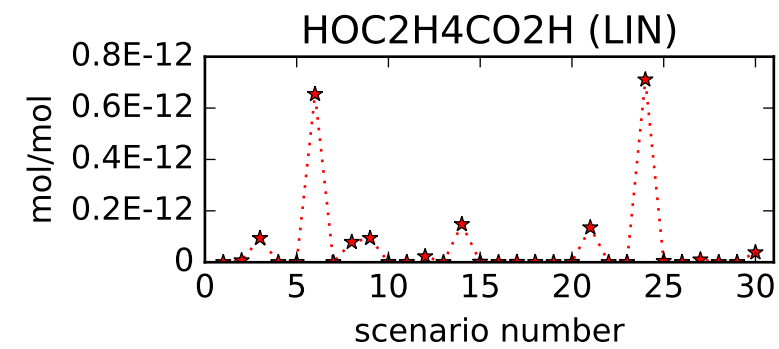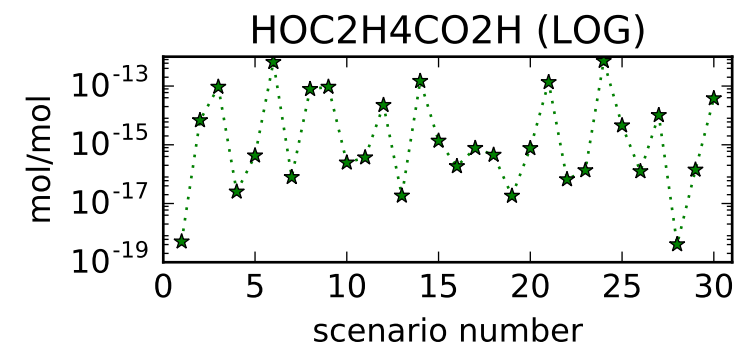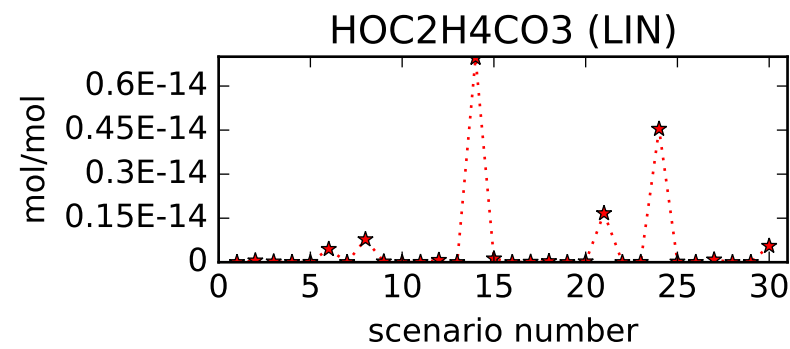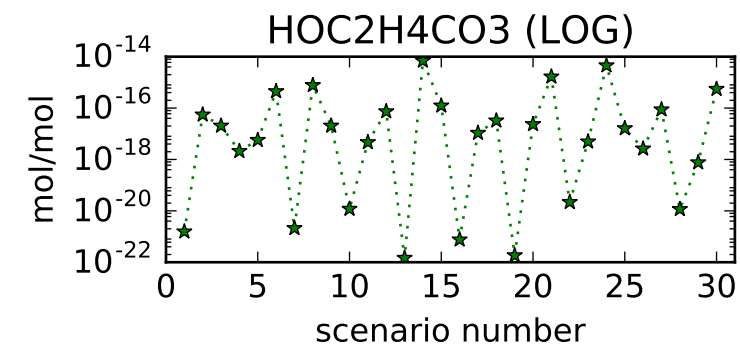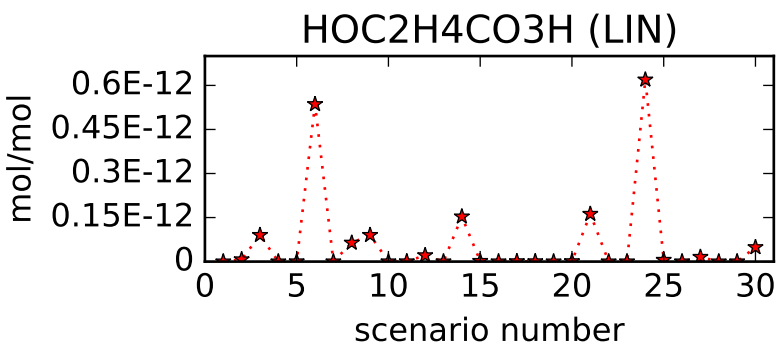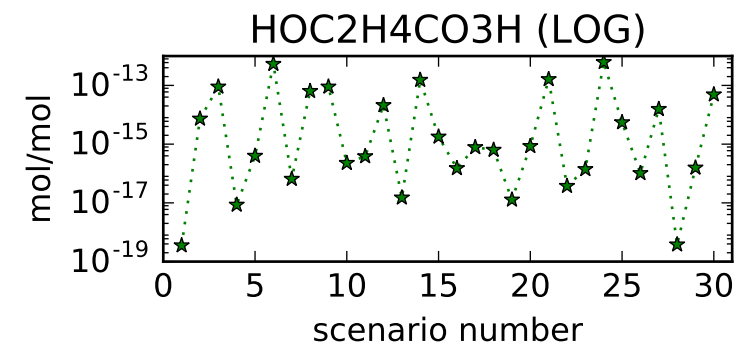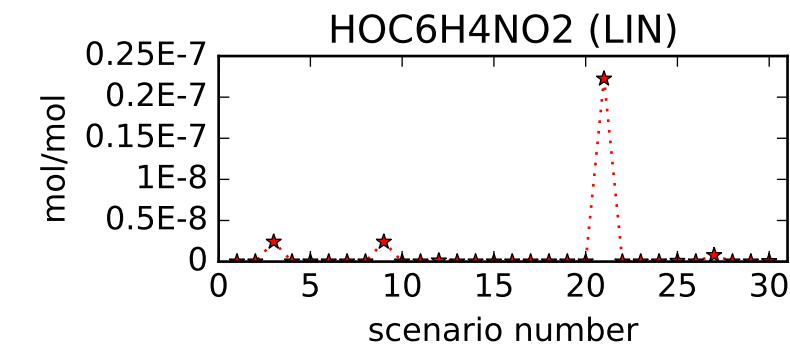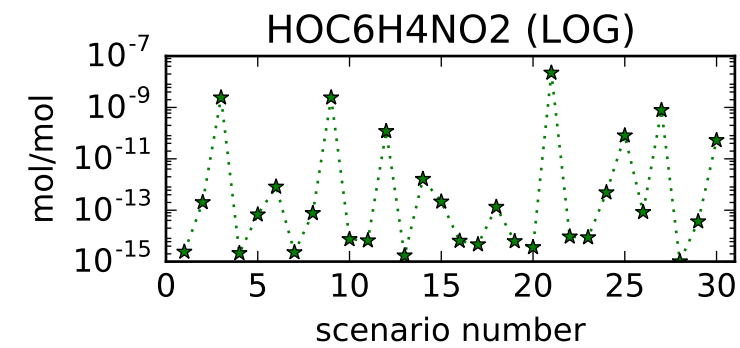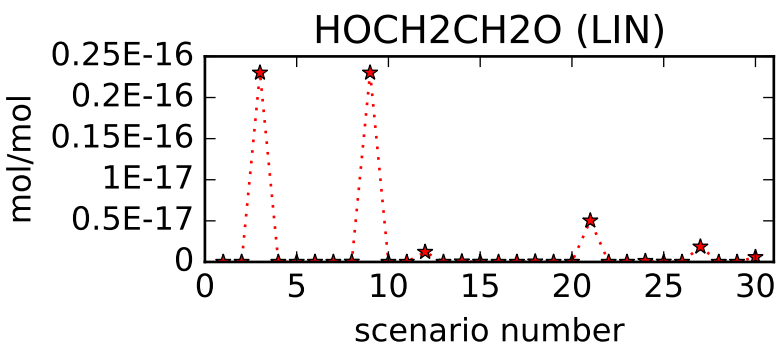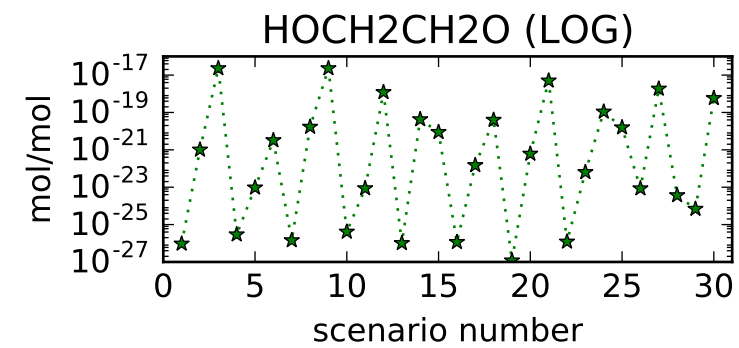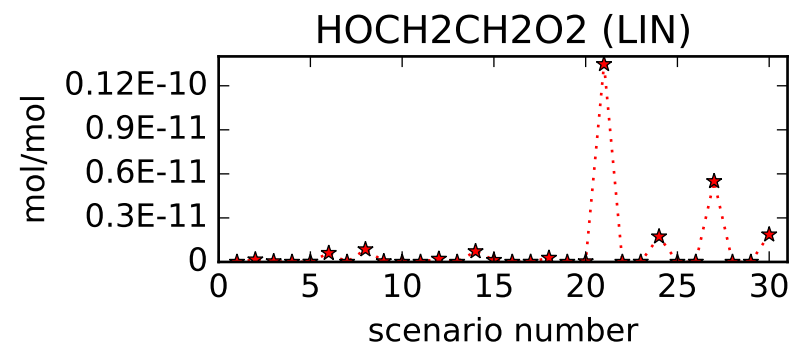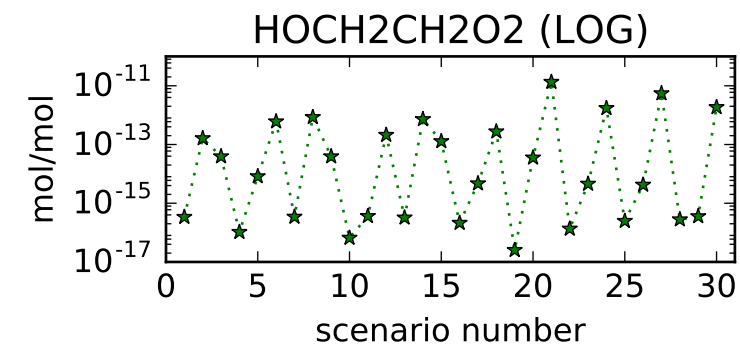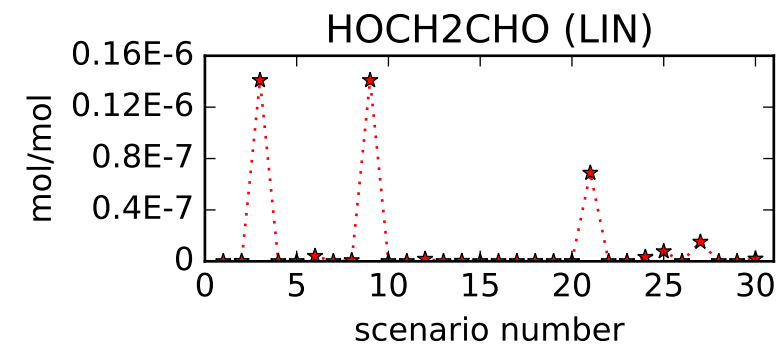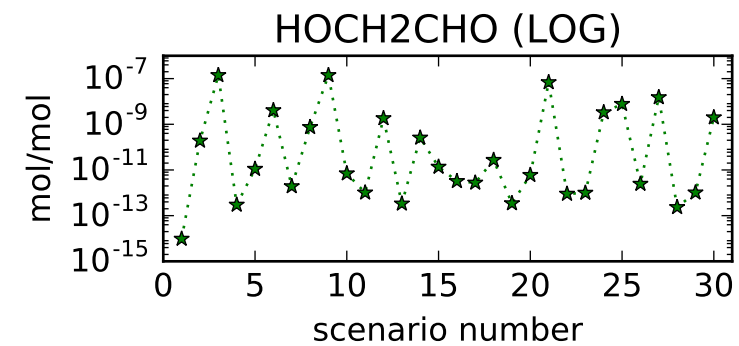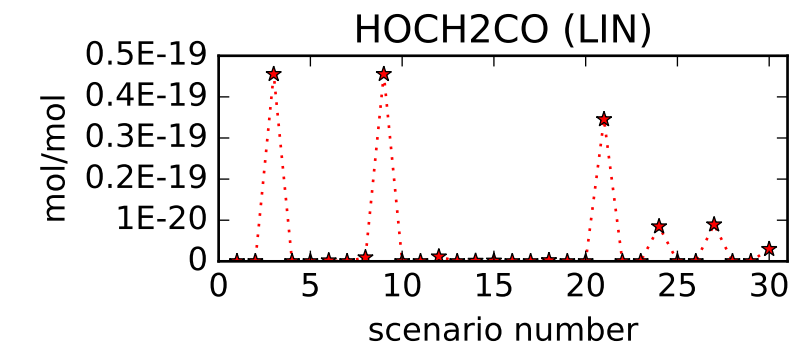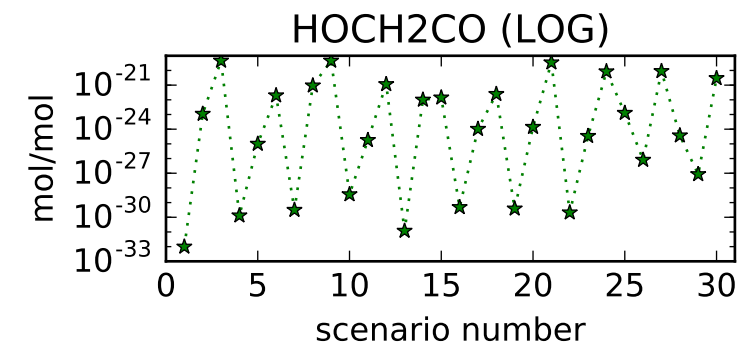

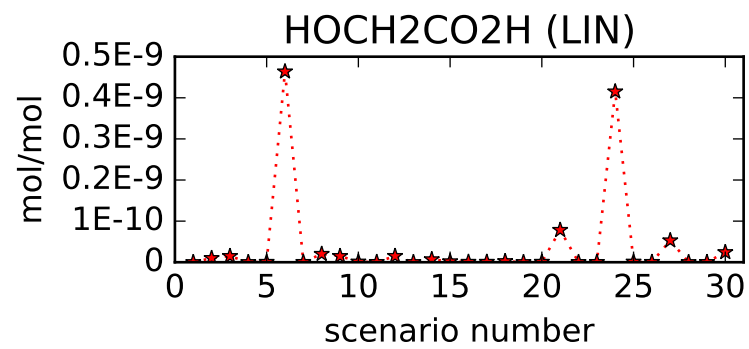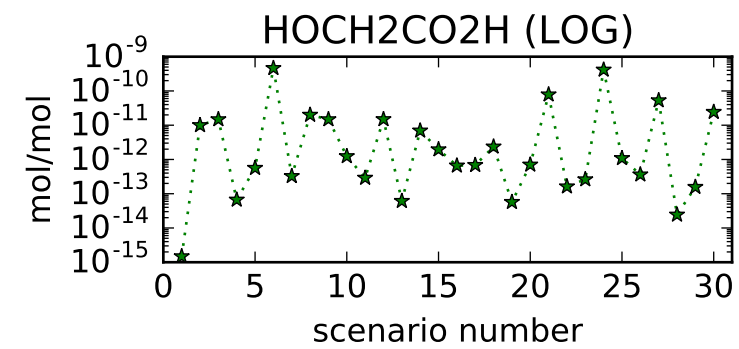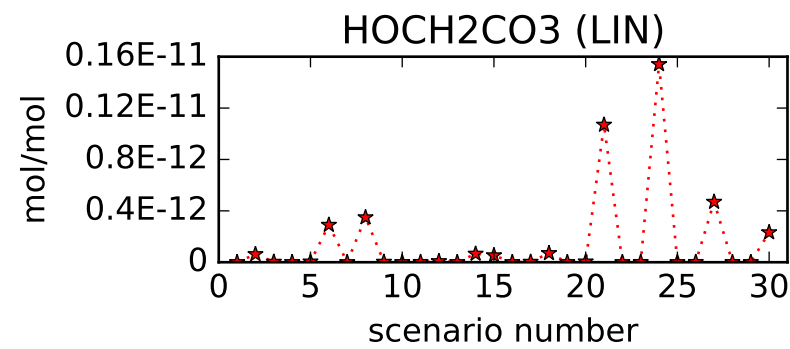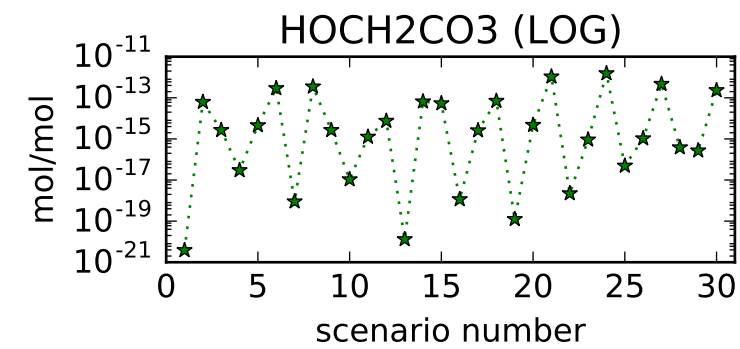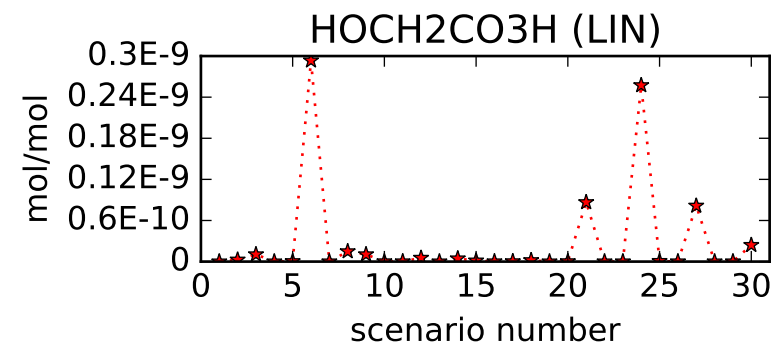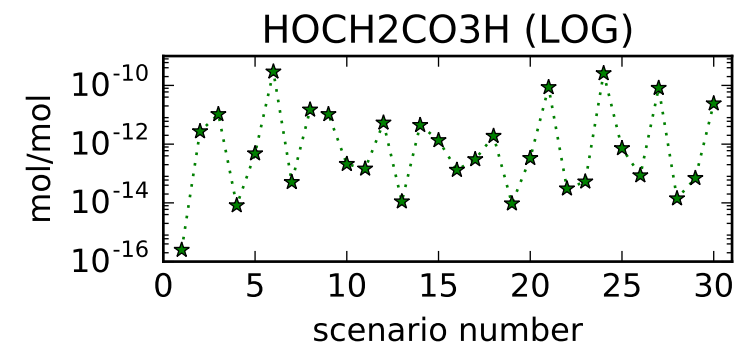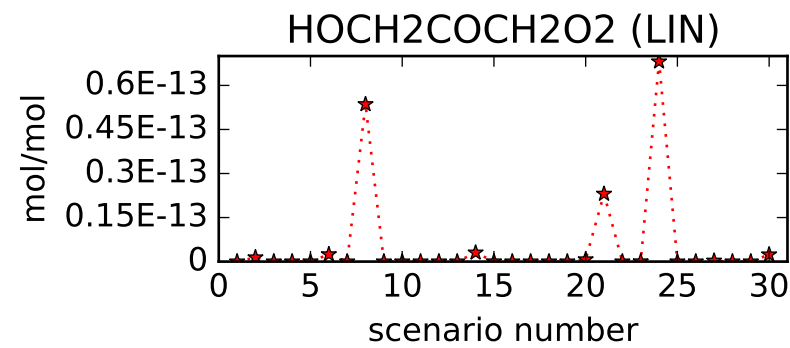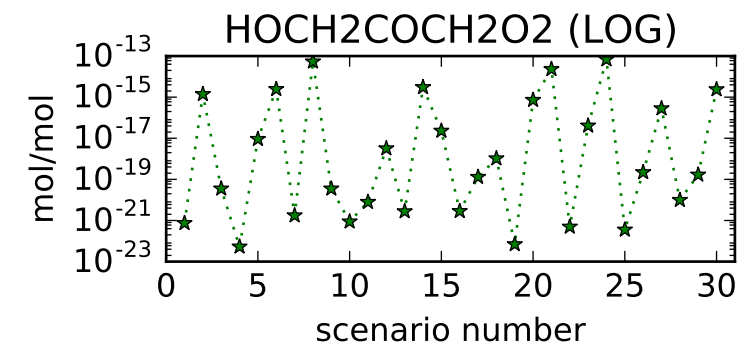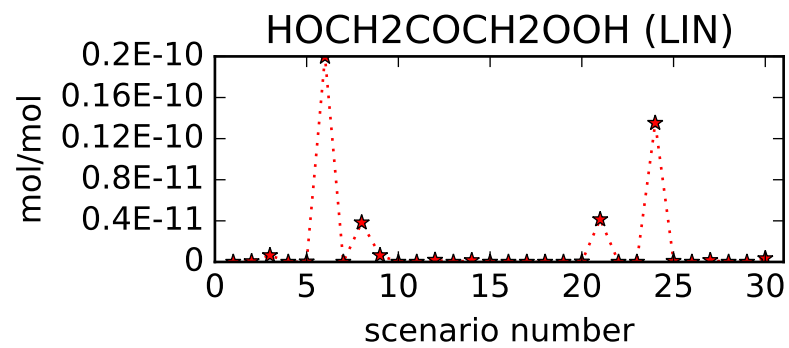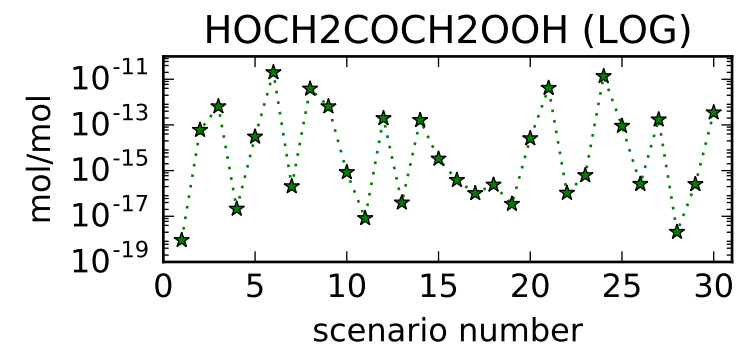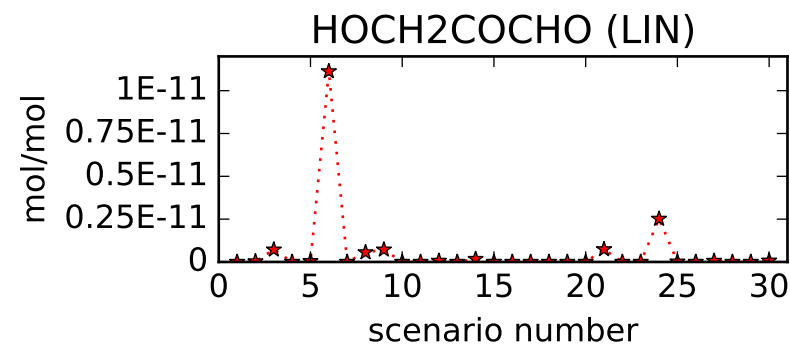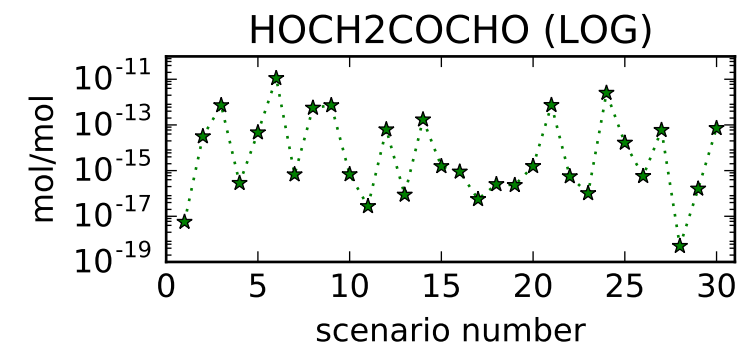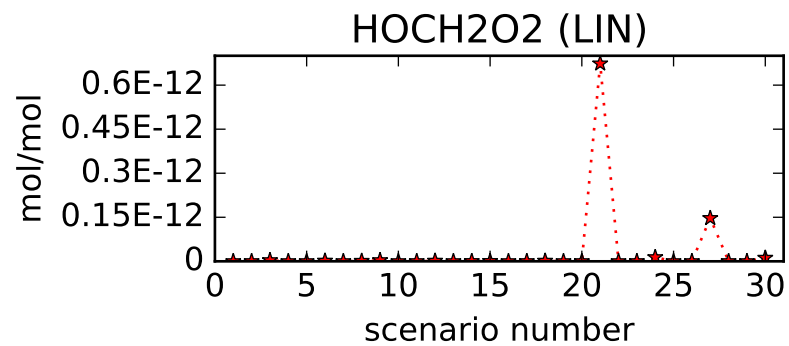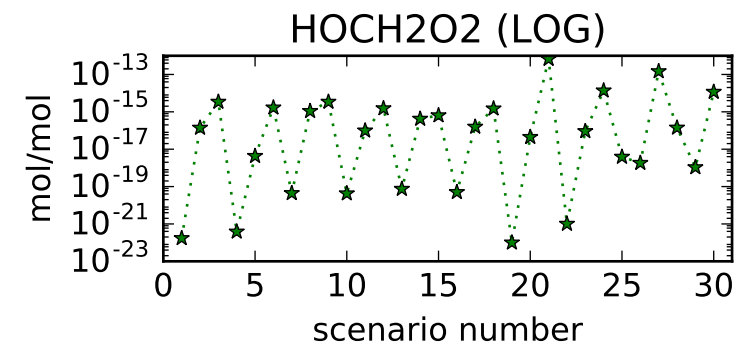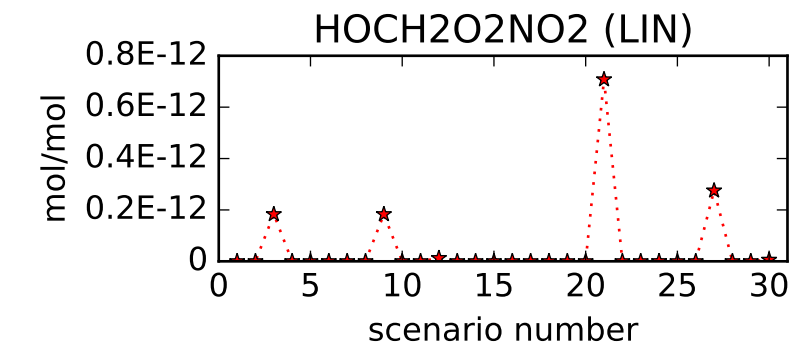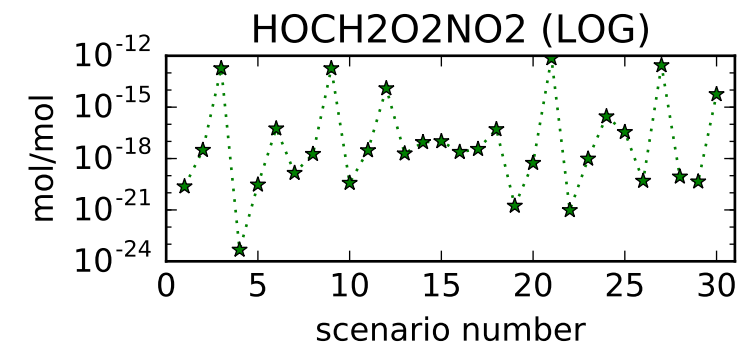

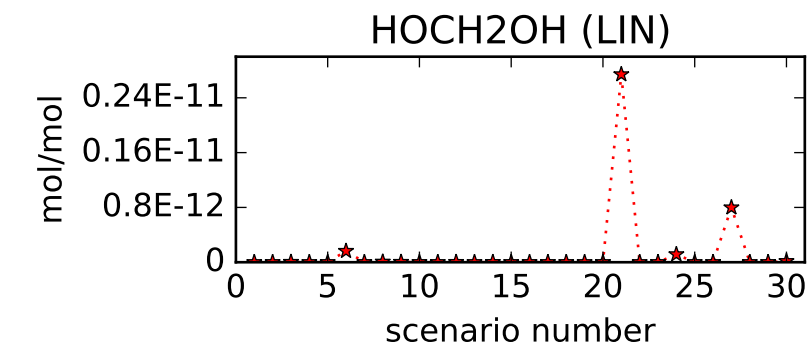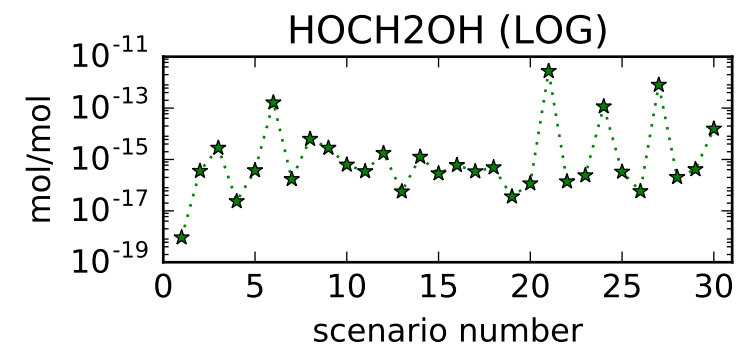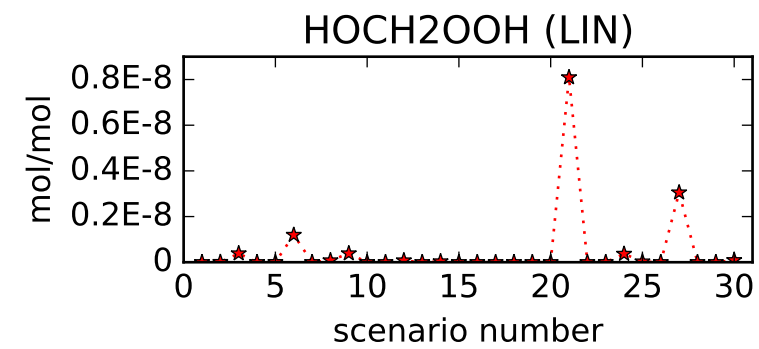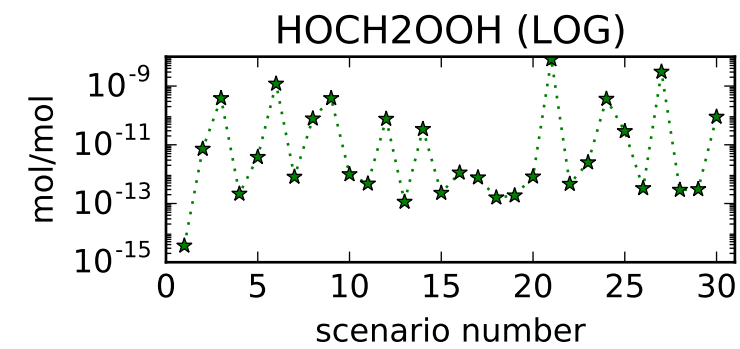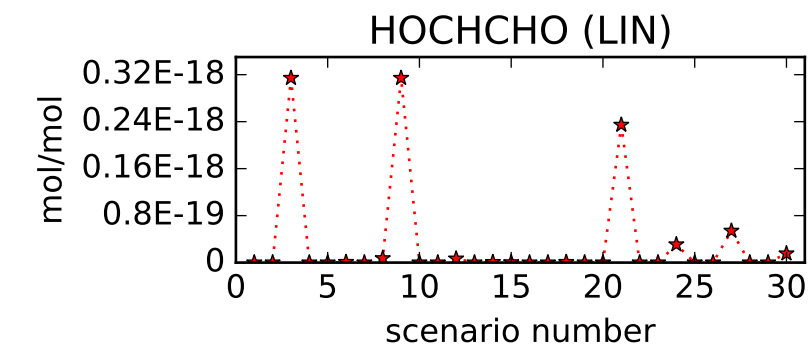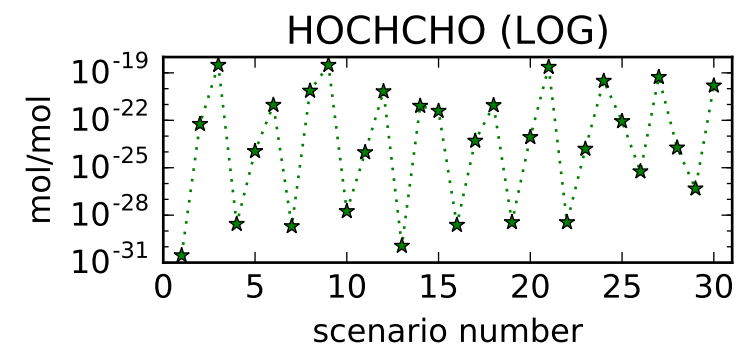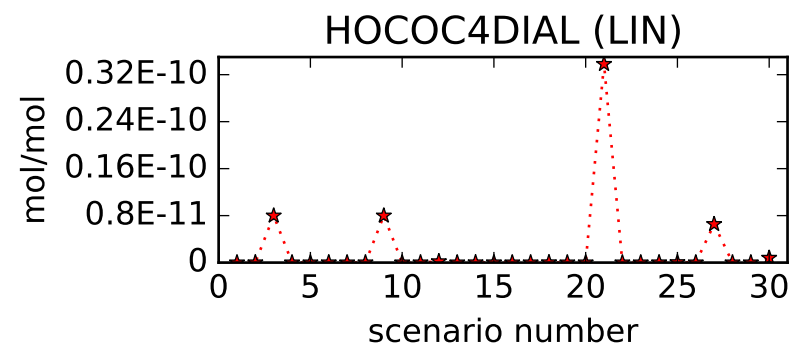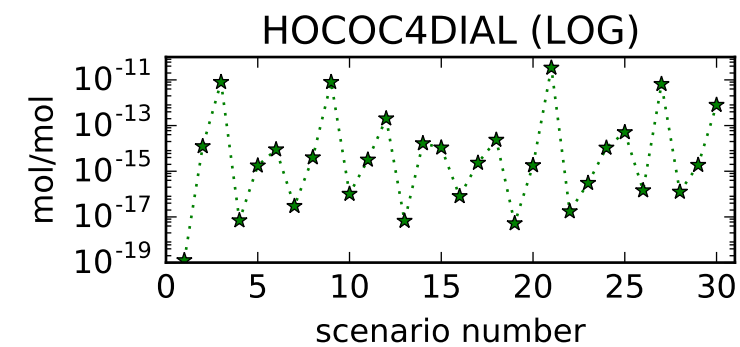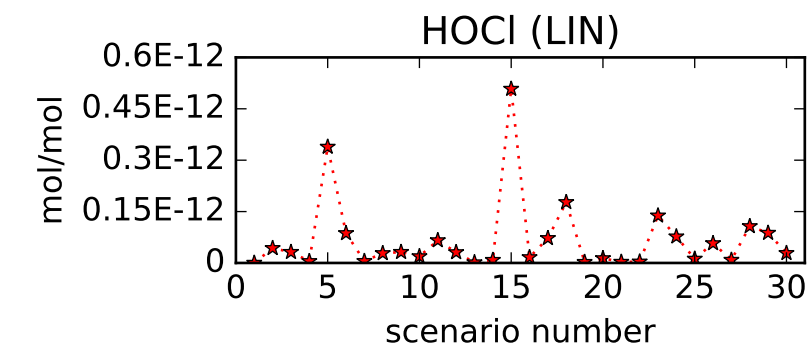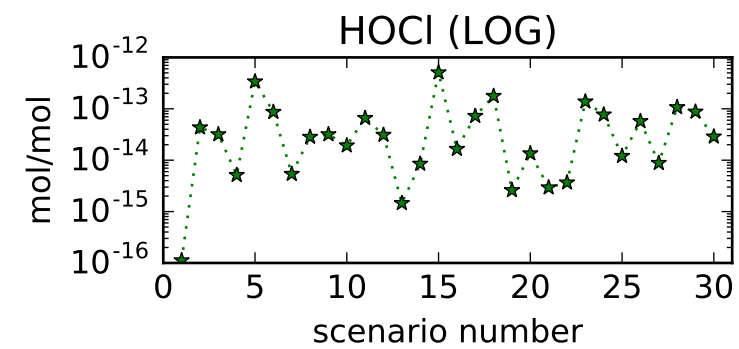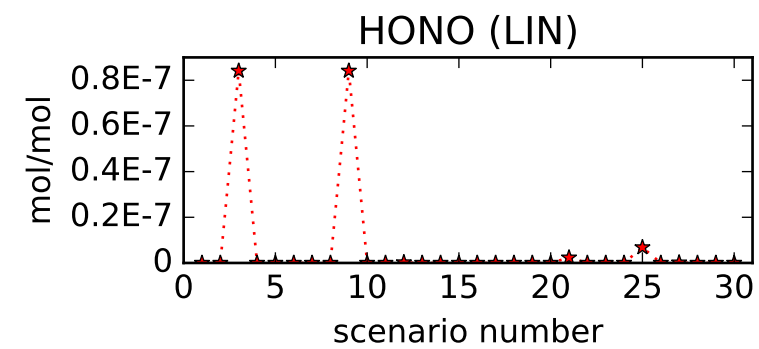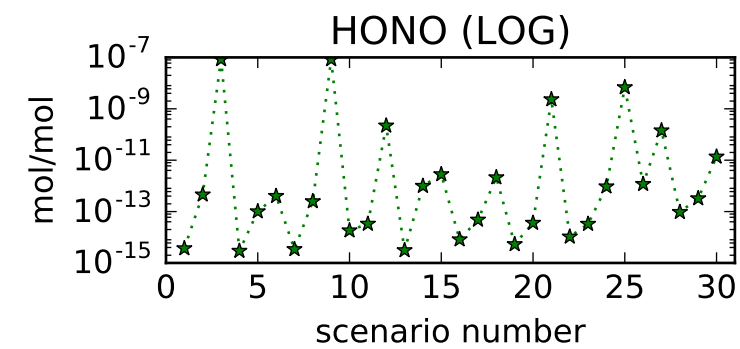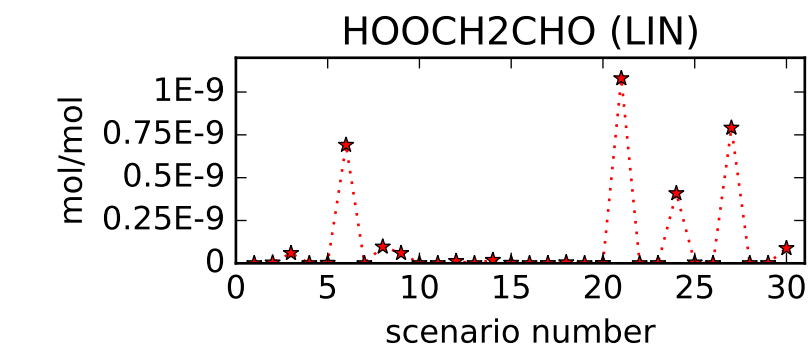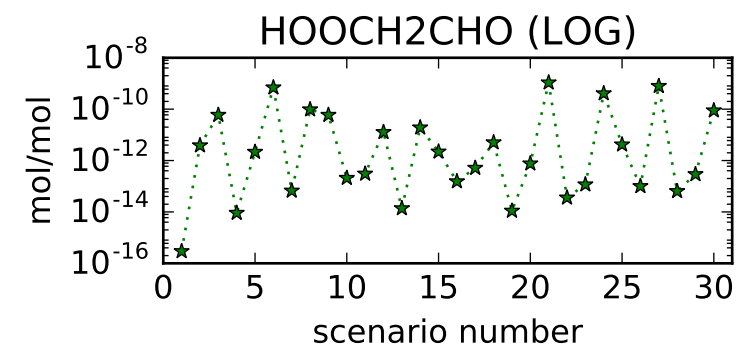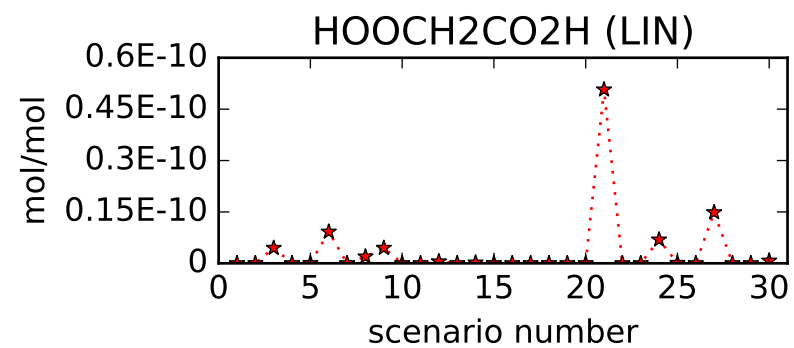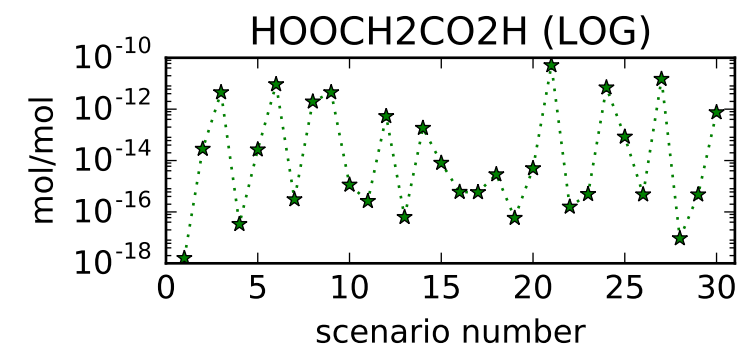

HOOCH2CO3 (LIN)

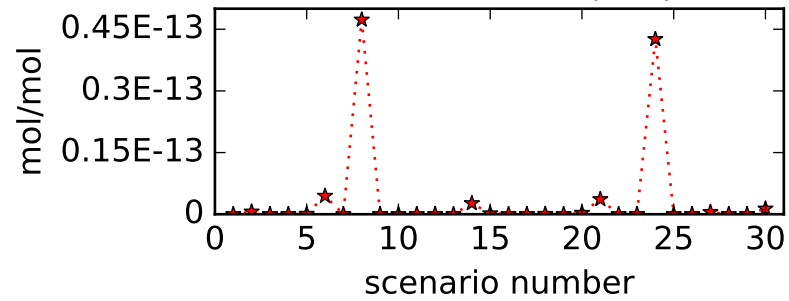

HOOCH2CO3 (LOG)

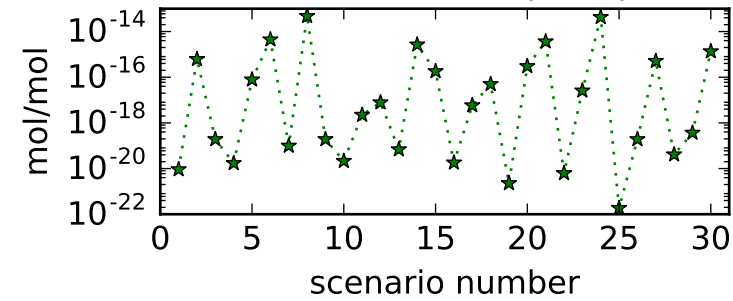

HOOCH2CO3H (LIN)

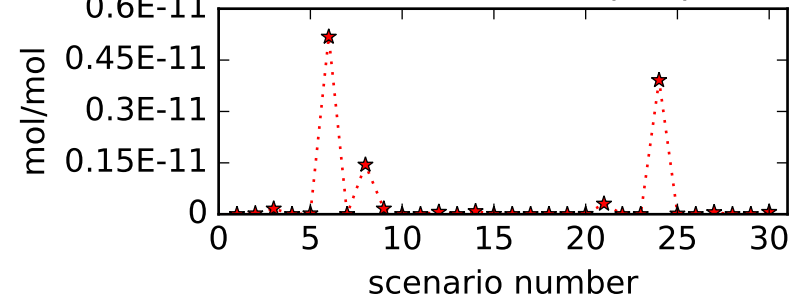

HOOCH2CO3H (LOG)

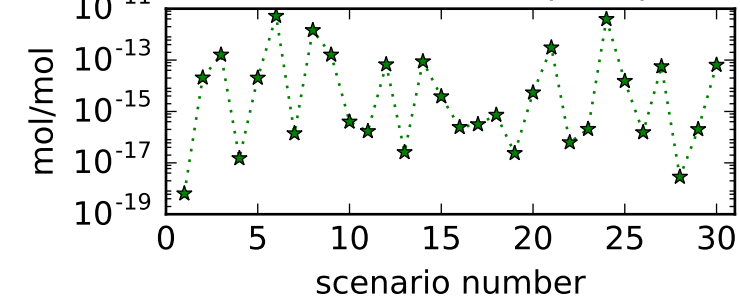

HVMK (LIN)

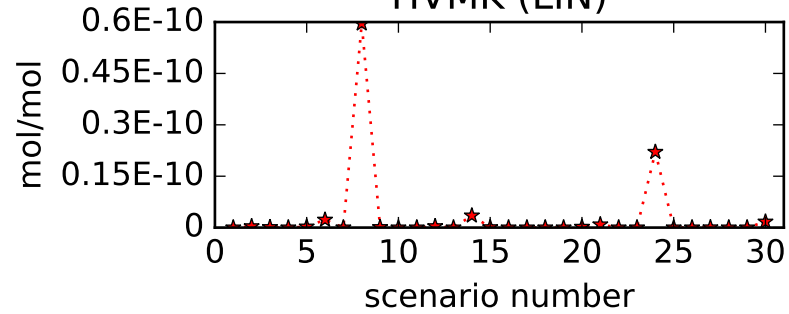

HVMK (LOG)

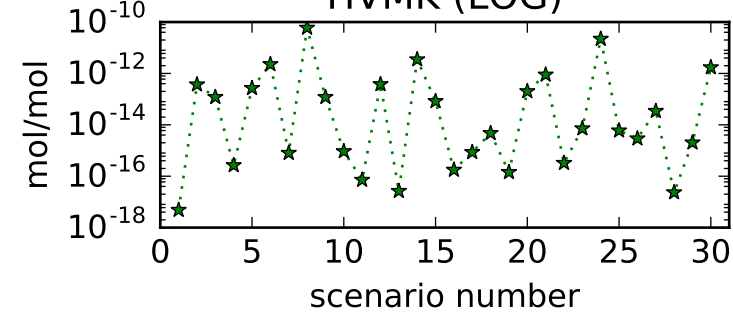

HYETHO2H (LIN)

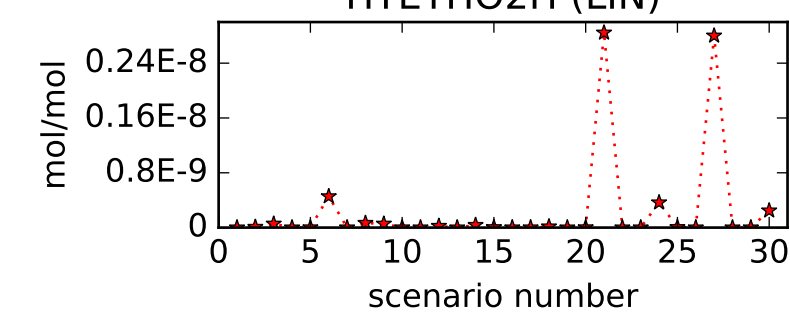

HYETHO2H (LOG)

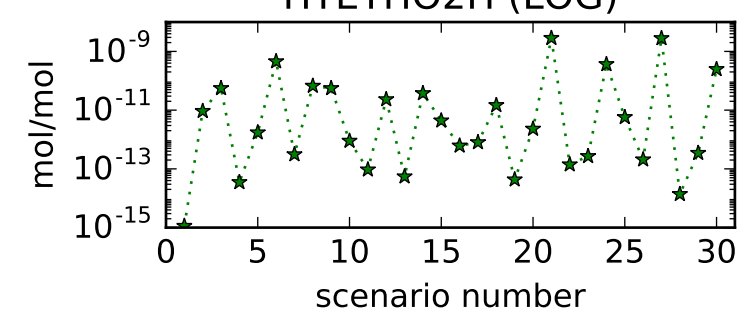

HYPERACET (LIN)

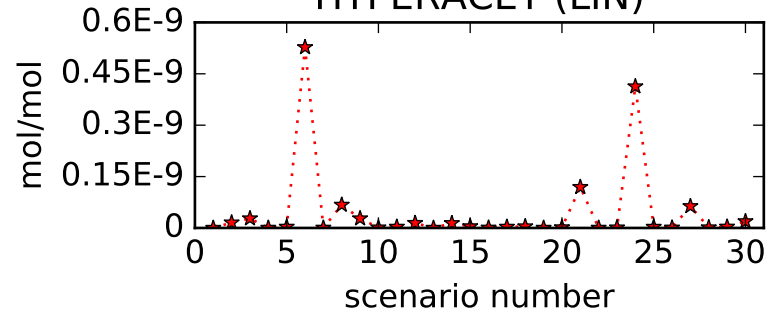

HYPERACET (LOG)

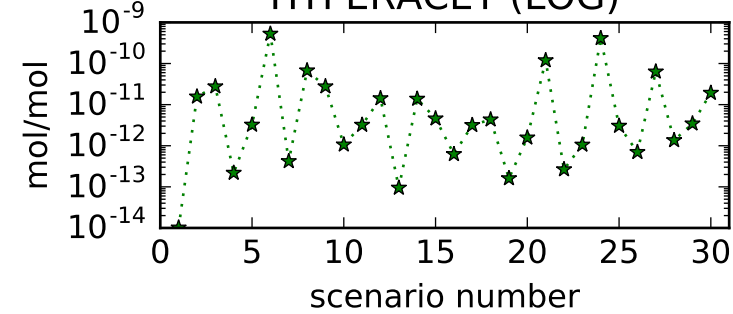

HYPROPO2 (LIN)

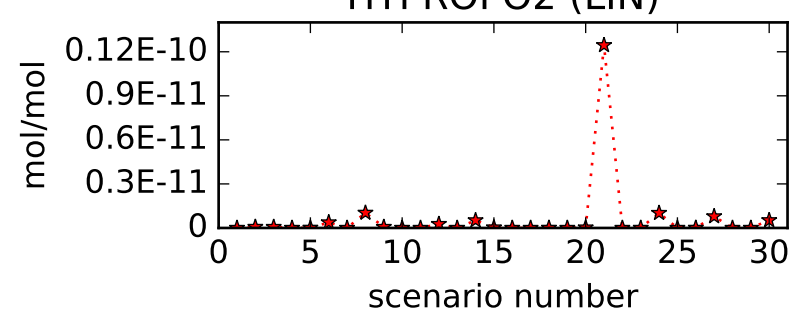

HYPROPO2 (LOG)

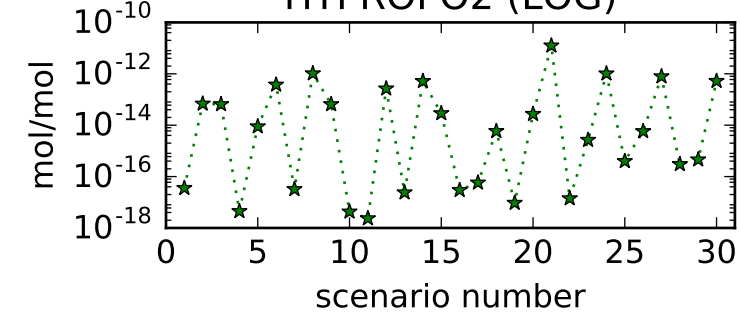

HYPROPO2H (LIN)

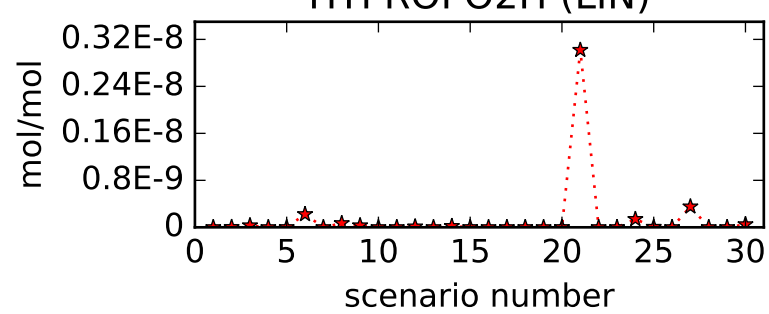

HYPROPO2H (LOG)

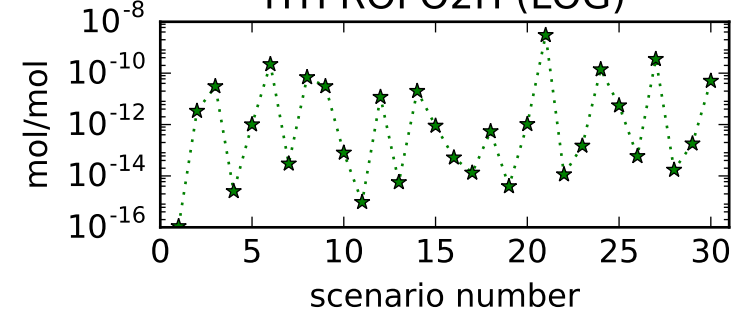

Hp\_cs (LIN)

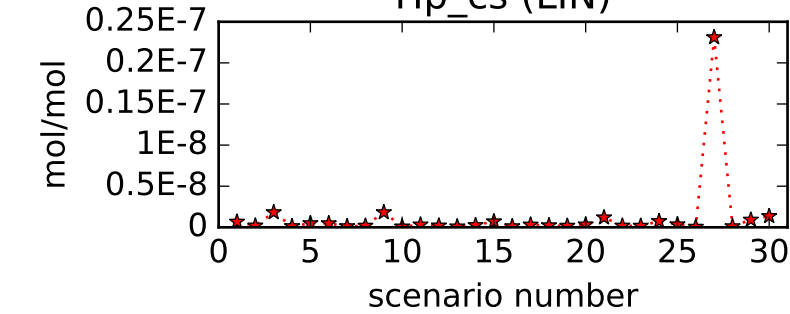

Hp\_cs (LOG)

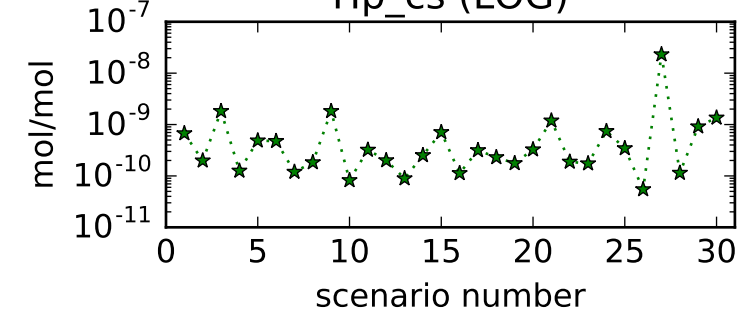



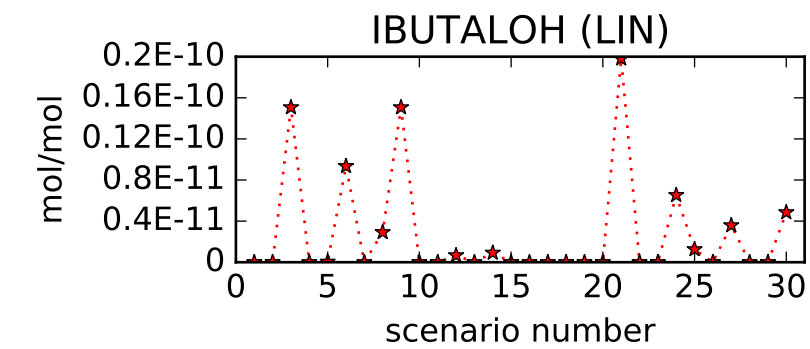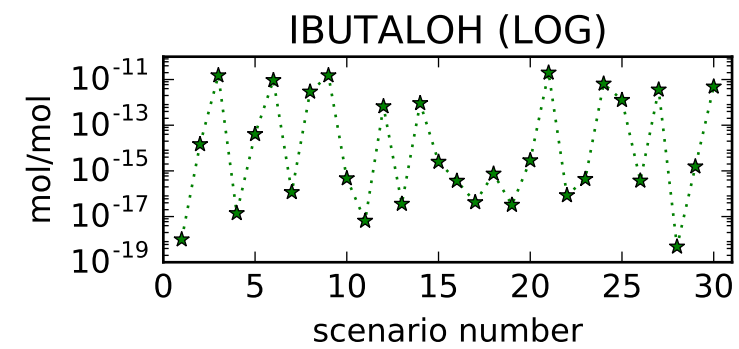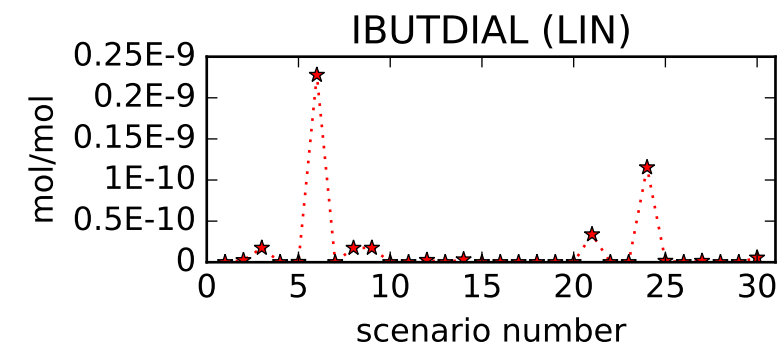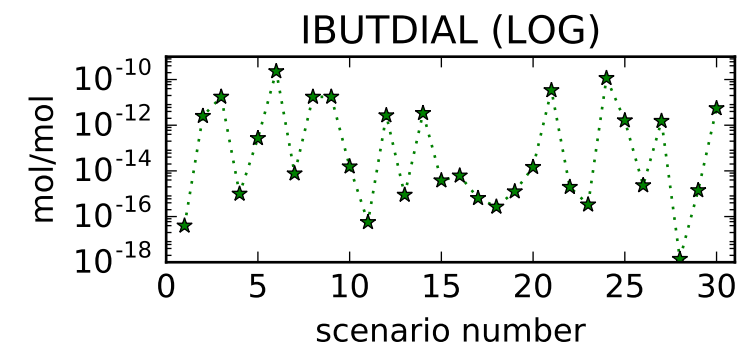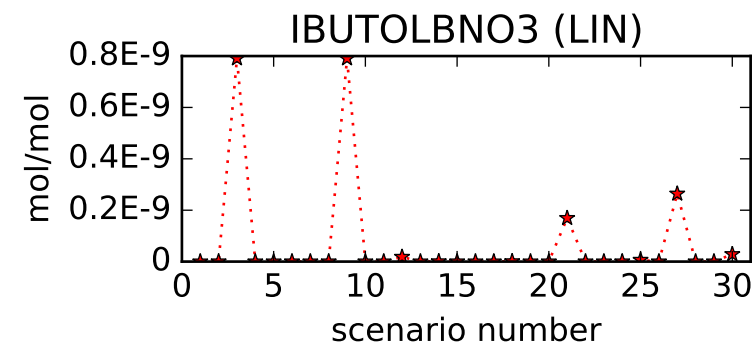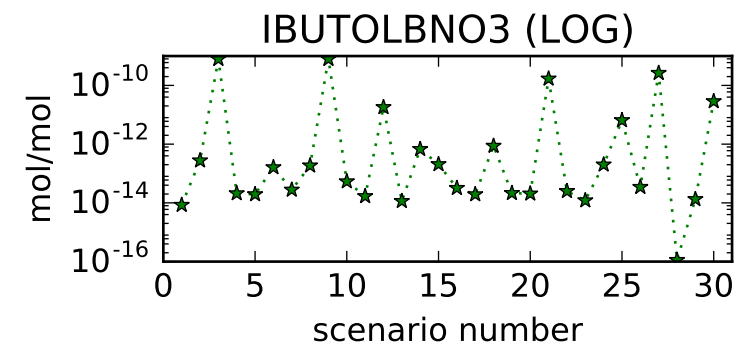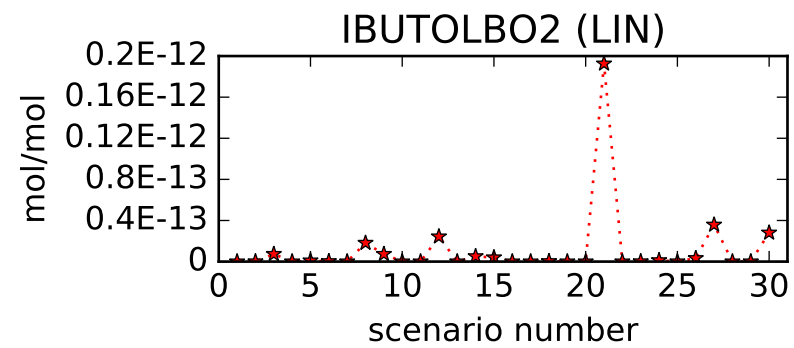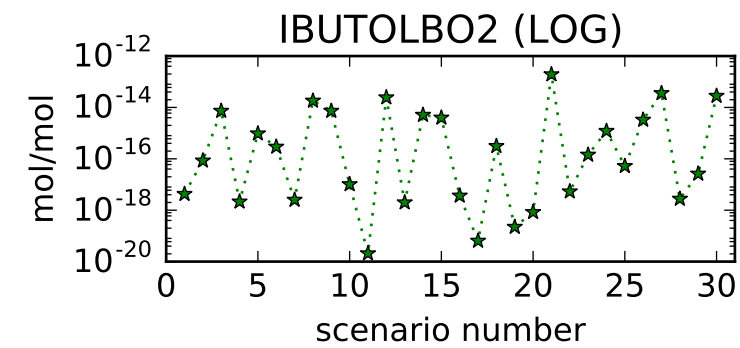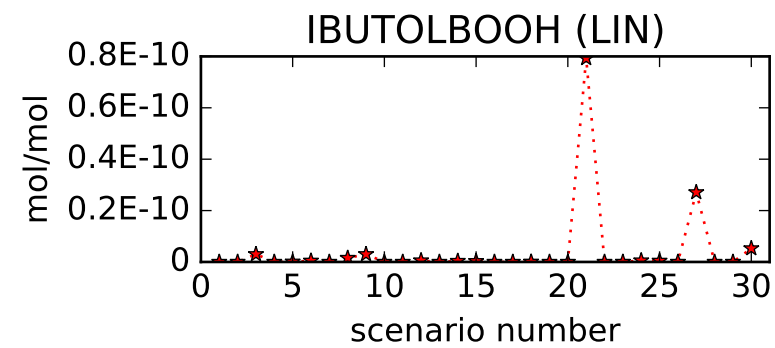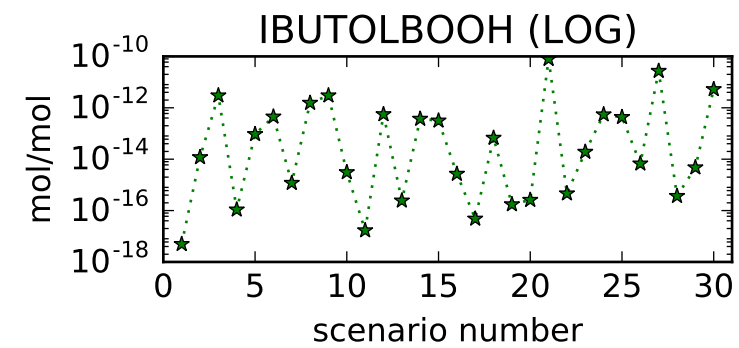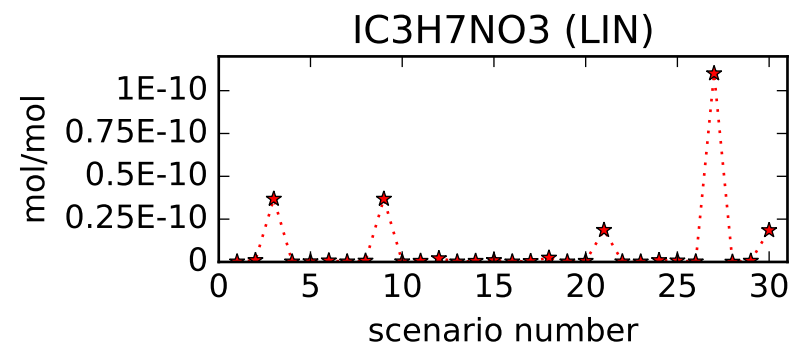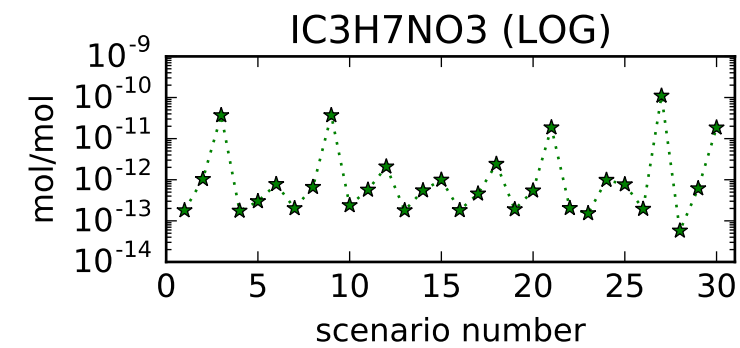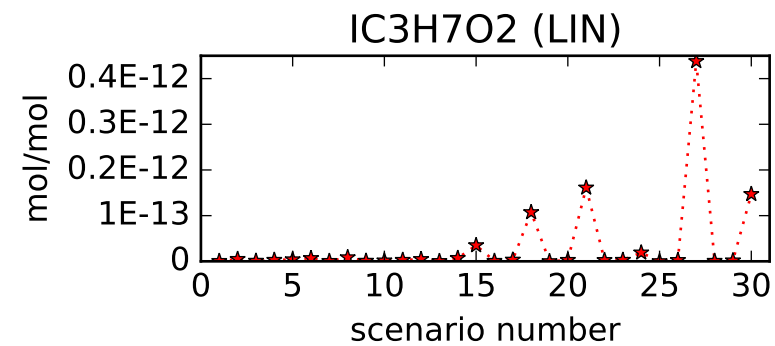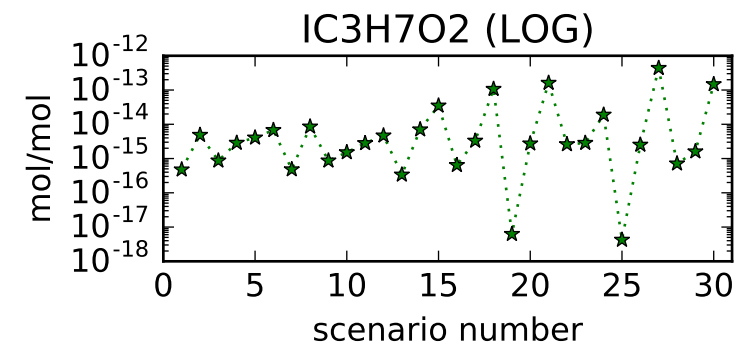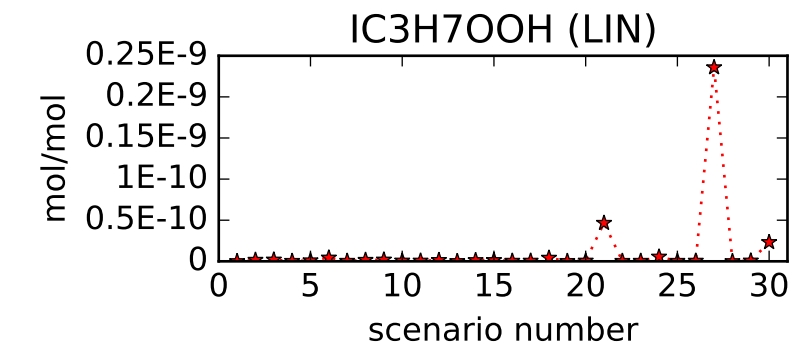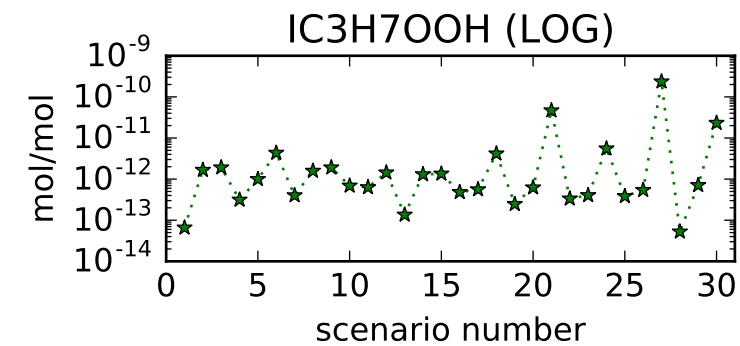

IC4H10 (LIN)

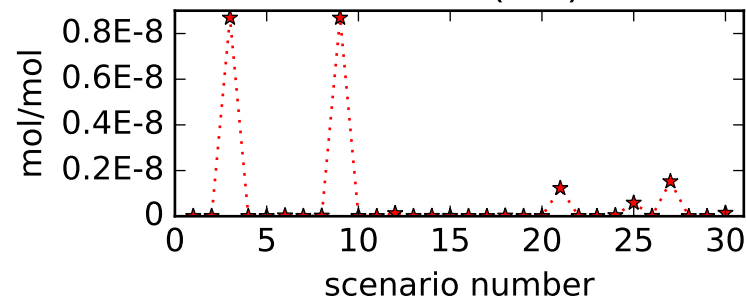

IC4H10 (LOG)

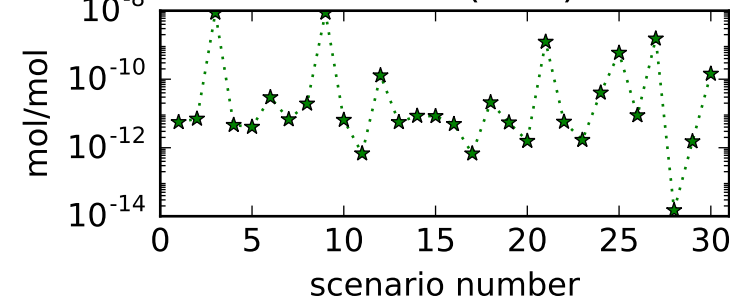

IC4H9NO3 (LIN)

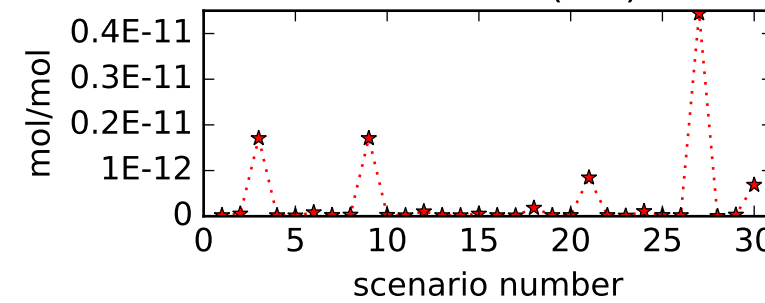

IC4H9NO3 (LOG)

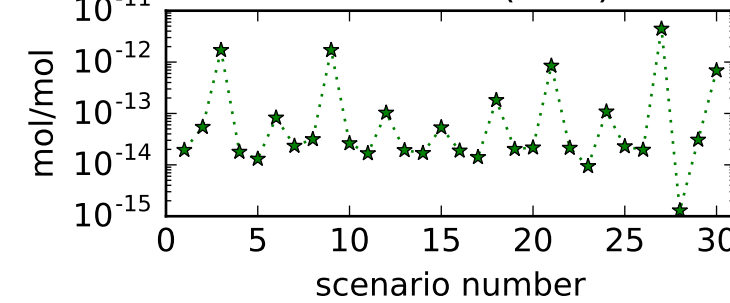

IC4H9O2 (LIN)

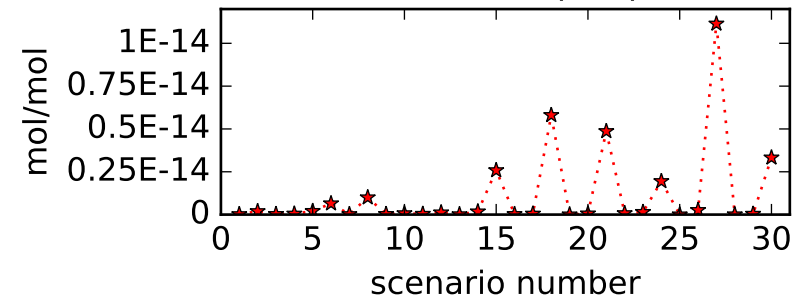

IC4H9O2 (LOG)

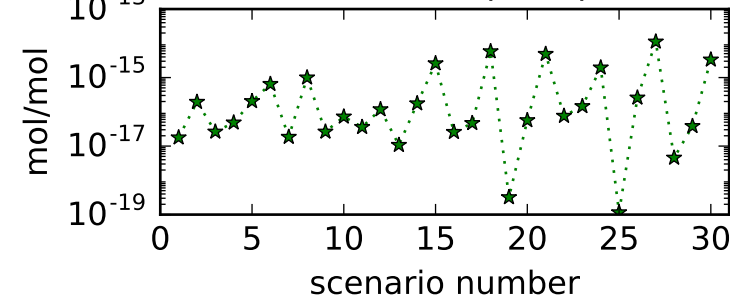

IC4H9OOH (LIN)

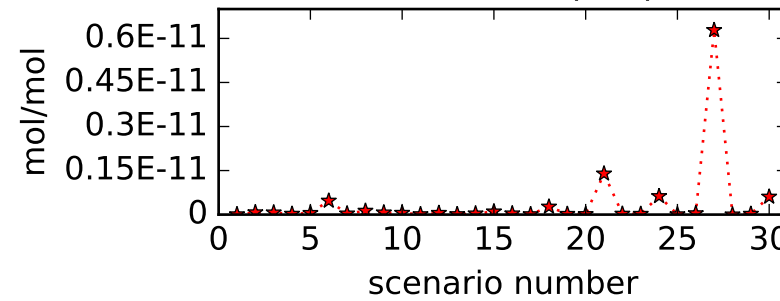

IC4H9OOH (LOG)

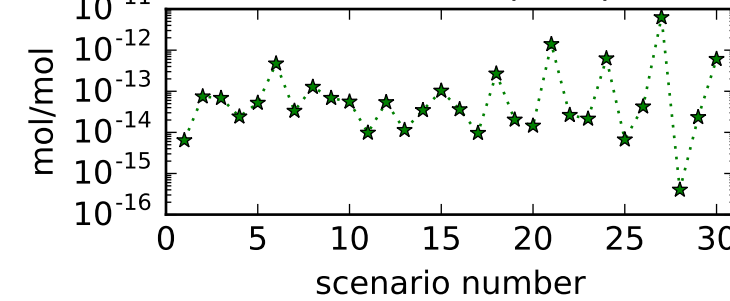

IPRCHO (LIN)

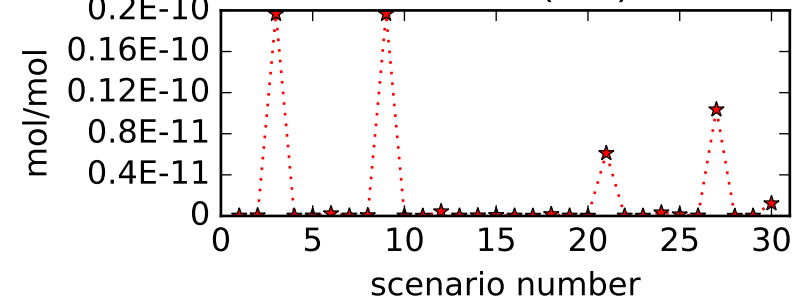

IPRCHO (LOG)

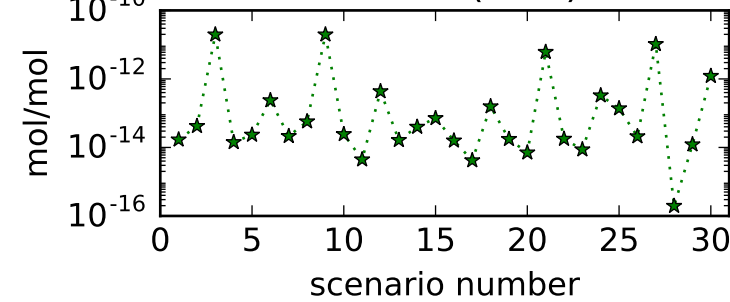

IPRCO3 (LIN)

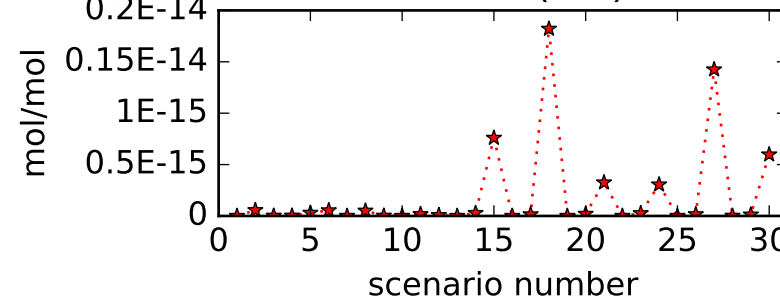

IPRCO3 (LOG)

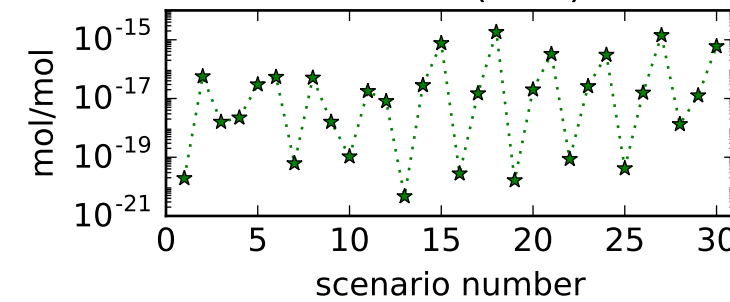

IPRHOCO2H (LIN)

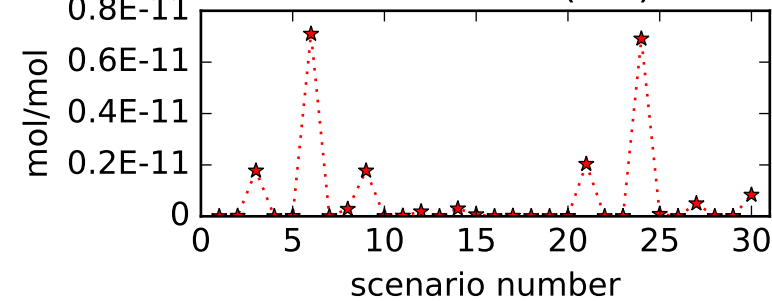

IPRHOCO2H (LOG)

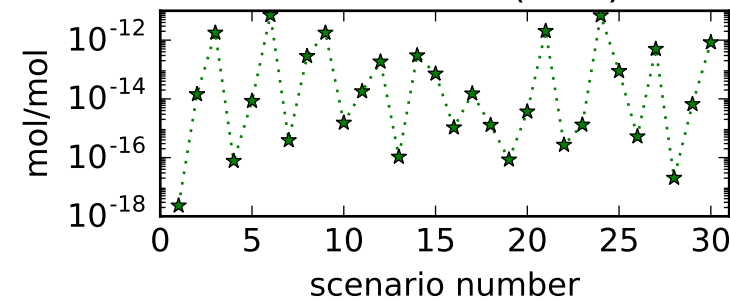

IPRHOCO3 (LIN)

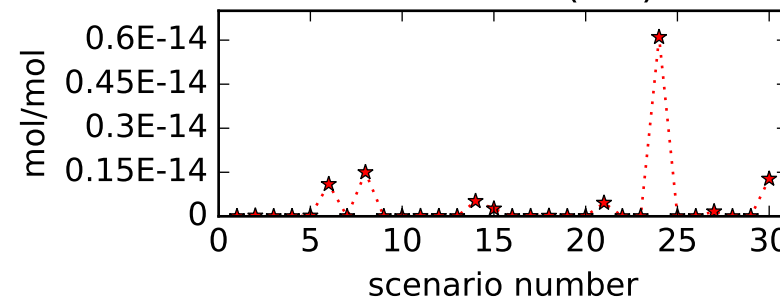

IPRHOCO3 (LOG)

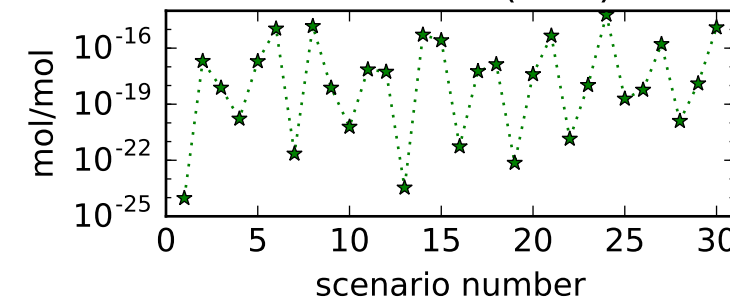

IPRHOCO3H (LIN)

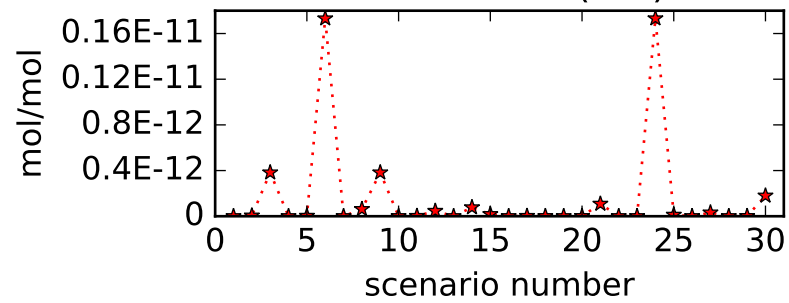

IPRHOCO3H (LOG)

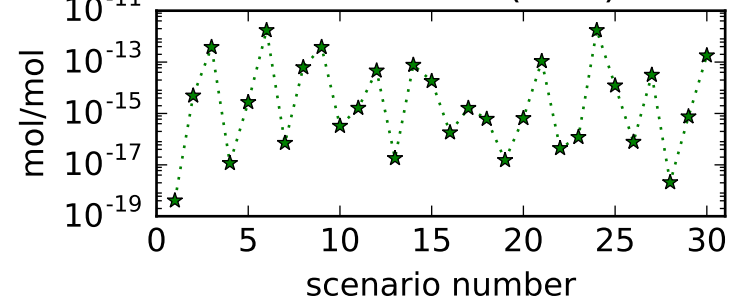

IPROPOL (LIN)

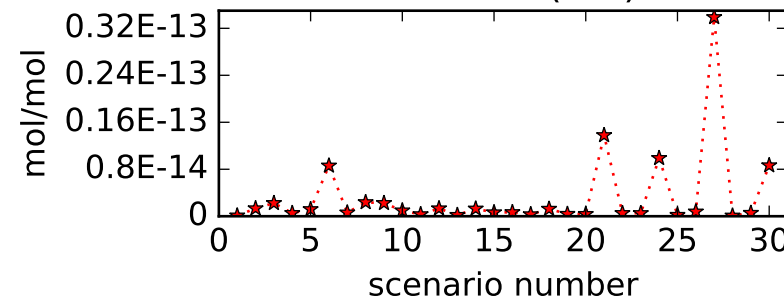

IPROPOL (LOG)

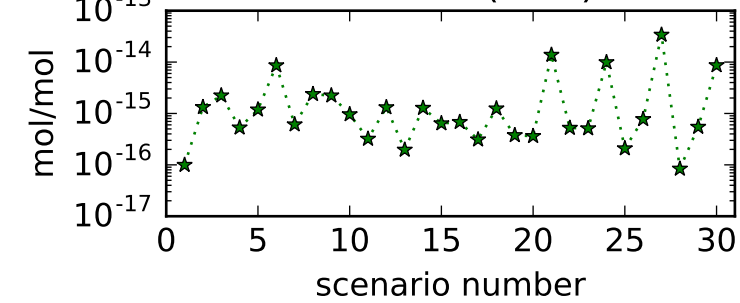

ISOPAB (LIN)

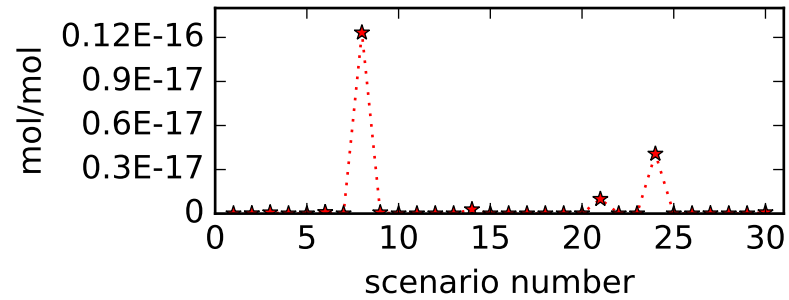

ISOPAB (LOG)

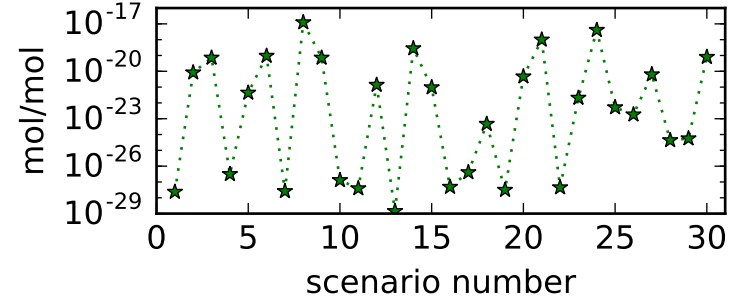

ISOPAHOH (LIN)

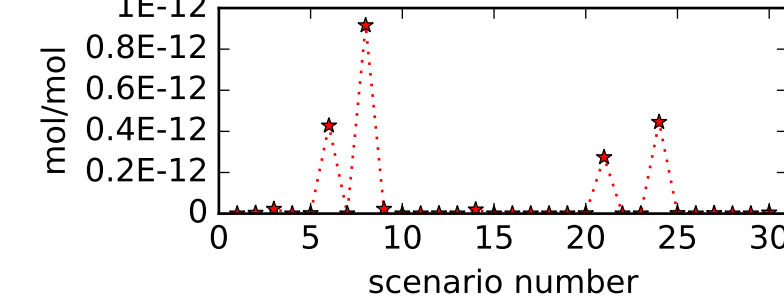

ISOPAHOH (LOG)

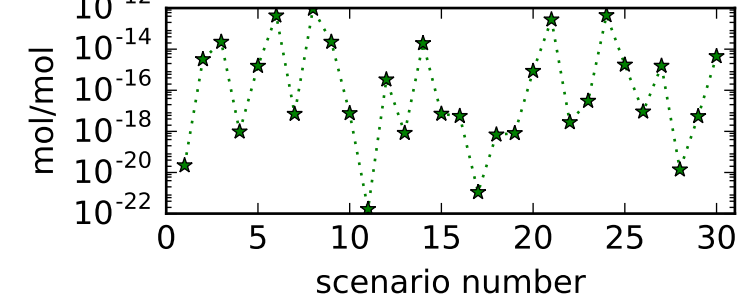

ISOPBDNO3O2 (LIN)

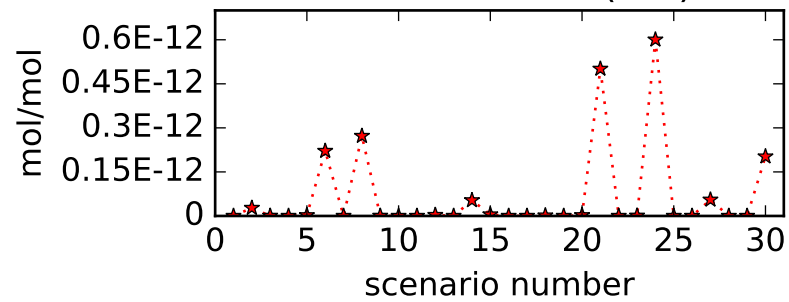

ISOPBDNO3O2 (LOG)

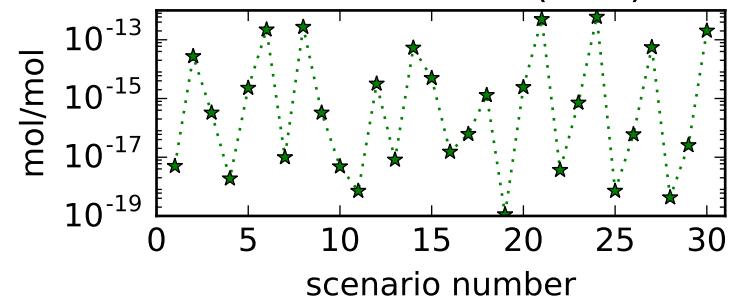

ISOPBNO3 (LIN)

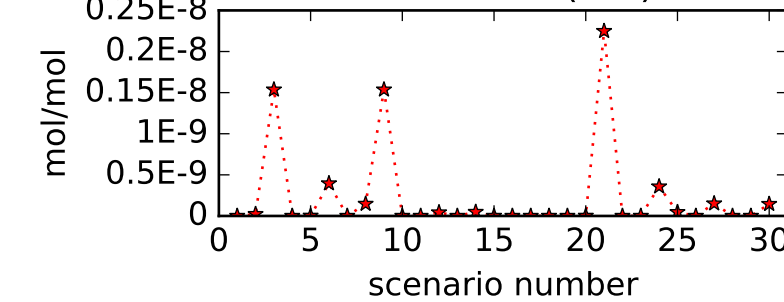

ISOPBNO3 (LOG)

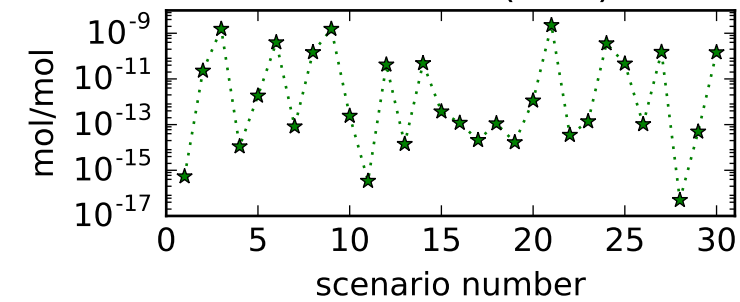

ISOPBO2 (LIN)

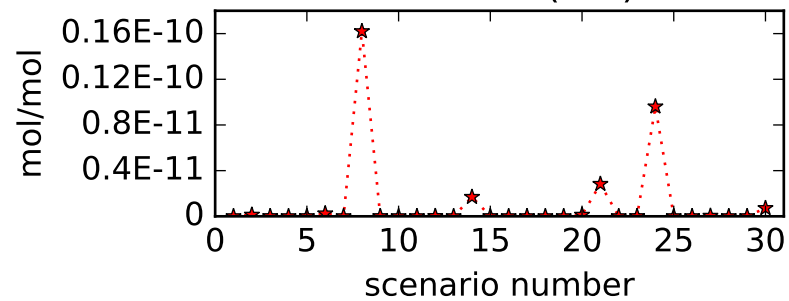

ISOPBO2 (LOG)

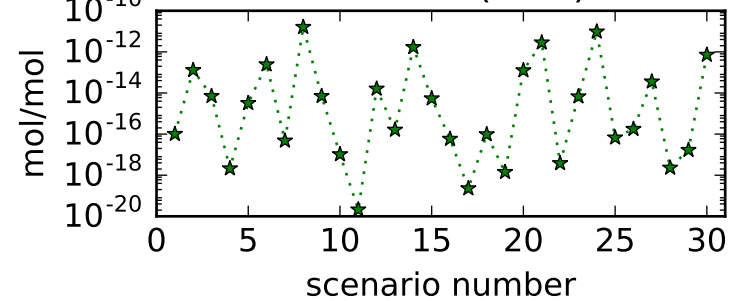

ISOPBOH (LIN)

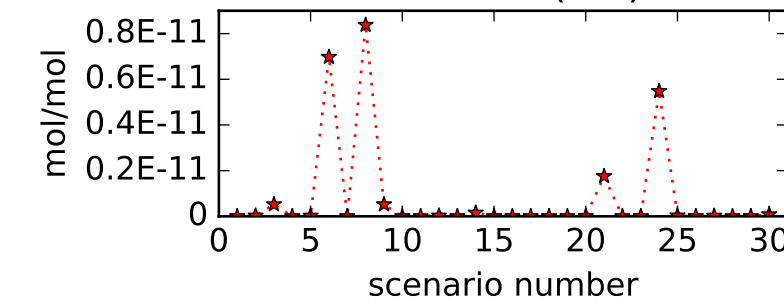

ISOPBOH (LOG)

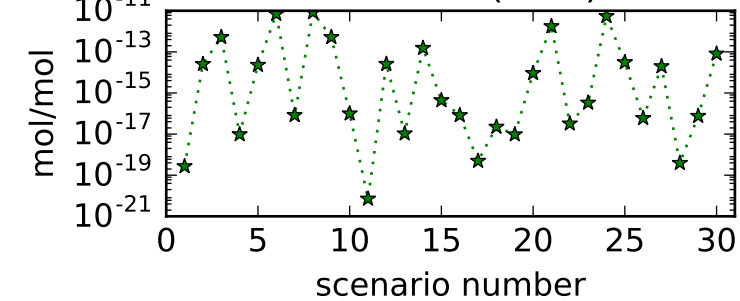

ISOPBOOH (LIN)

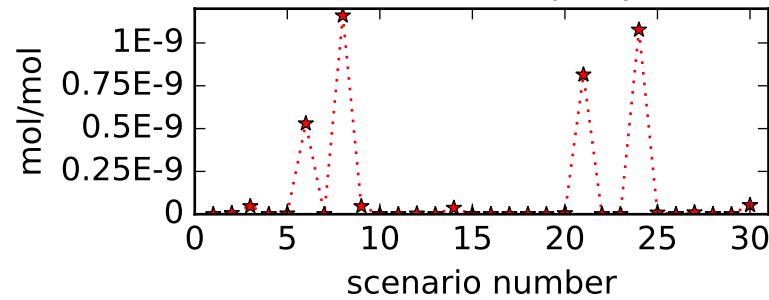

ISOPBOOH (LOG)

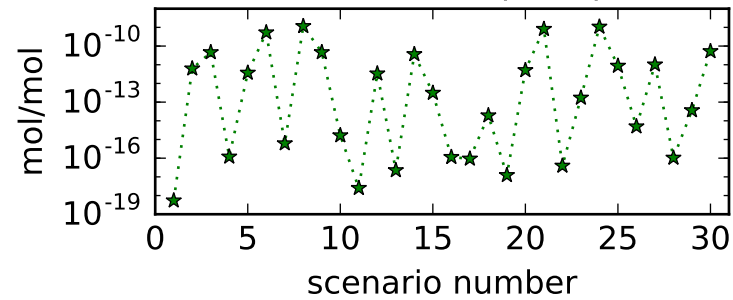

ISOPCD (LIN)

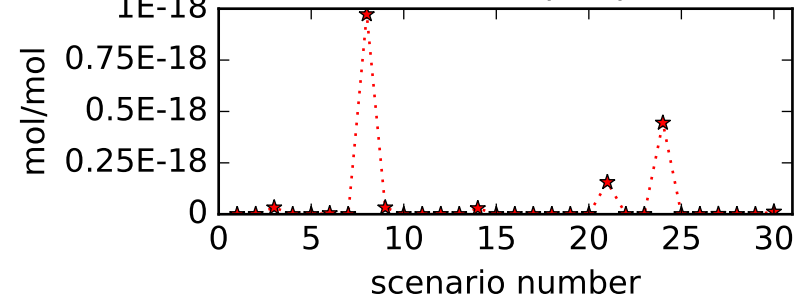

ISOPCD (LOG)

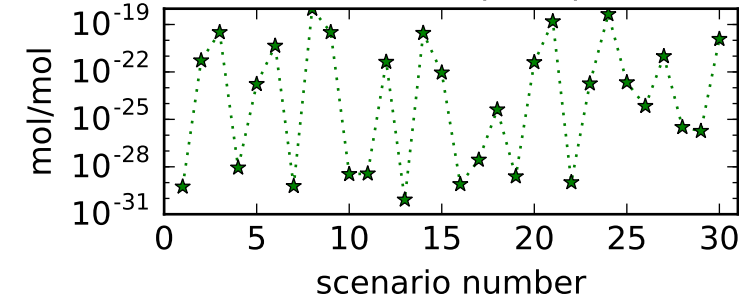

ISOPDNO3 (LIN)

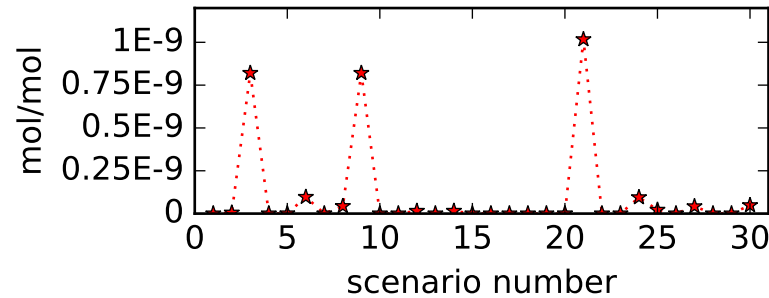

ISOPDNO3 (LOG)

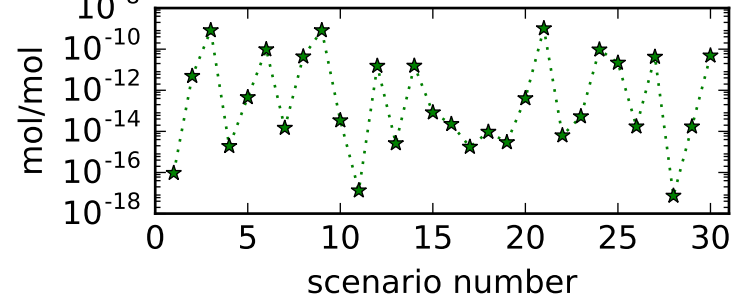

ISOPDO2 (LIN)

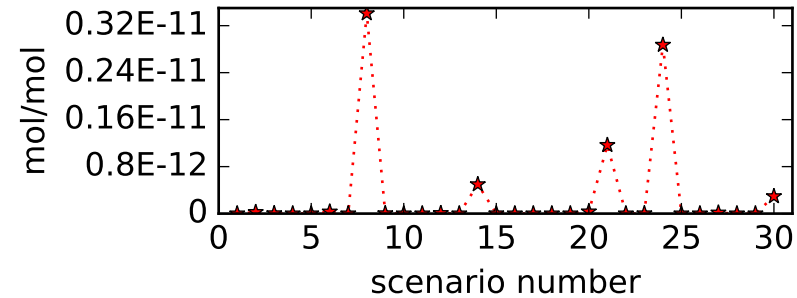

ISOPDO2 (LOG)

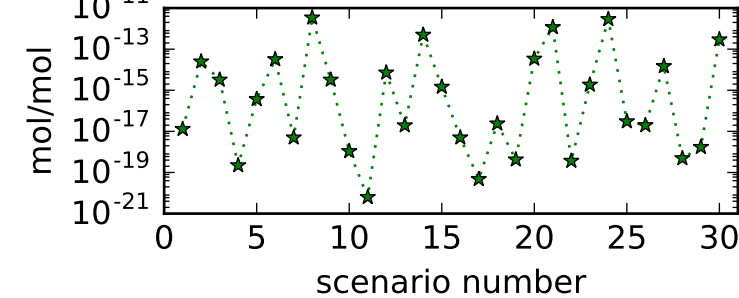

ISOPDOH (LIN)

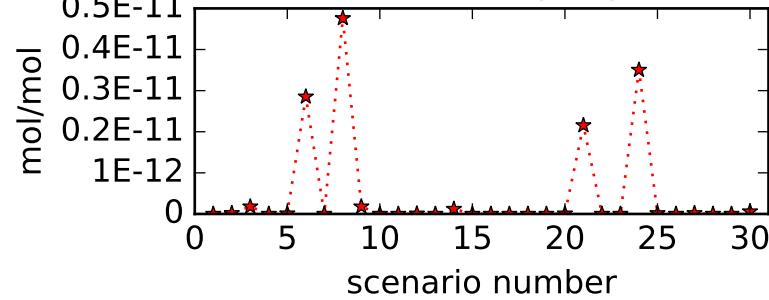

ISOPDOH (LOG)

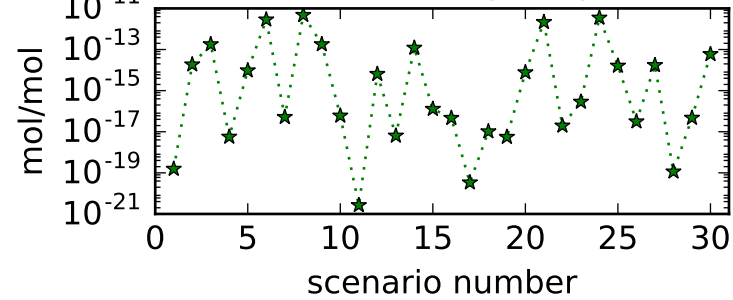

ISOPDOOH (LIN)

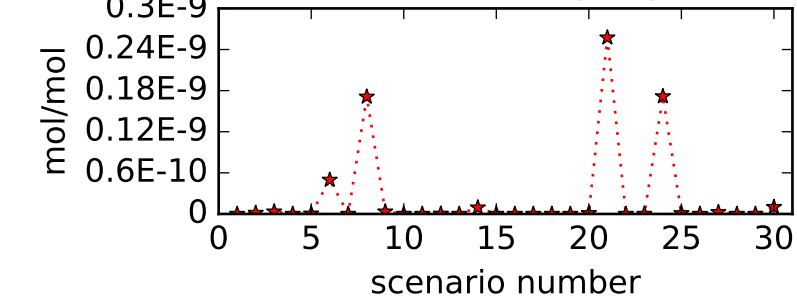

ISOPDOOH (LOG)

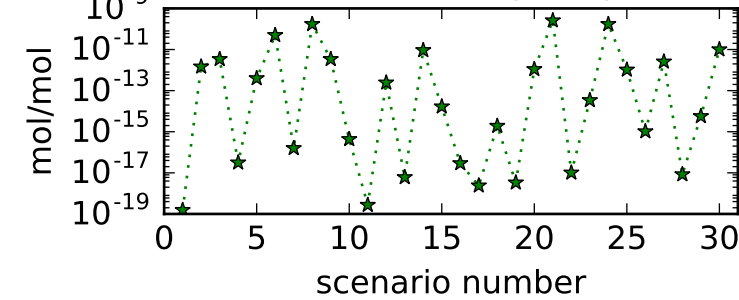

J\_BENZAL (LIN)

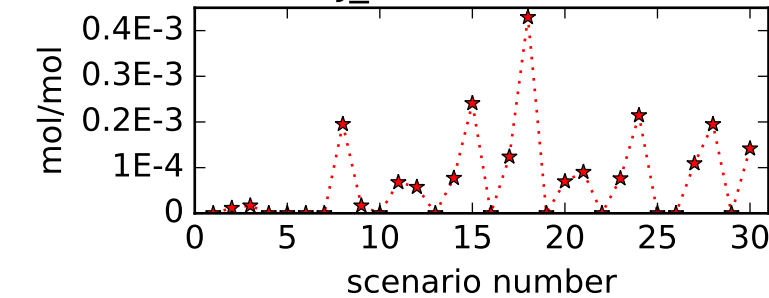

J\_BENZAL (LOG)

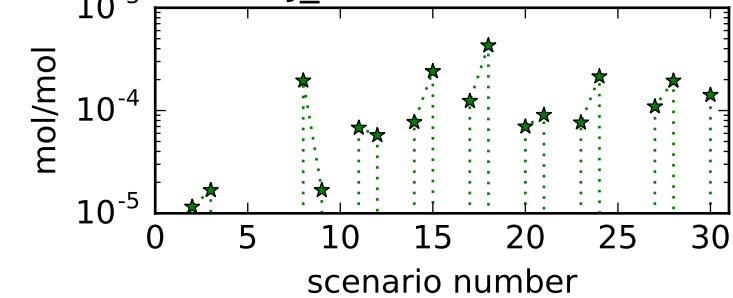

J\_Br2 (LIN)

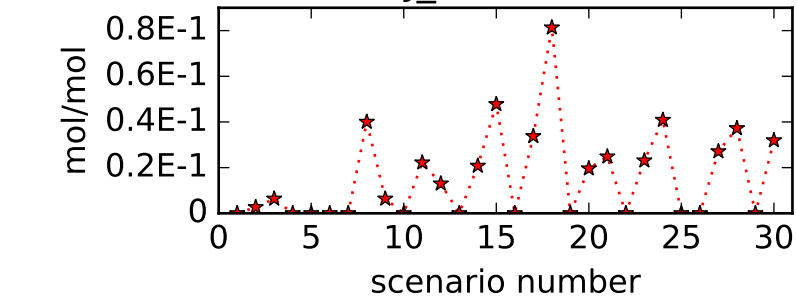

J\_Br2 (LOG)

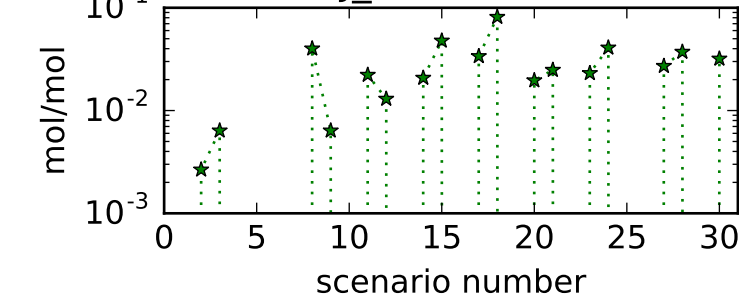

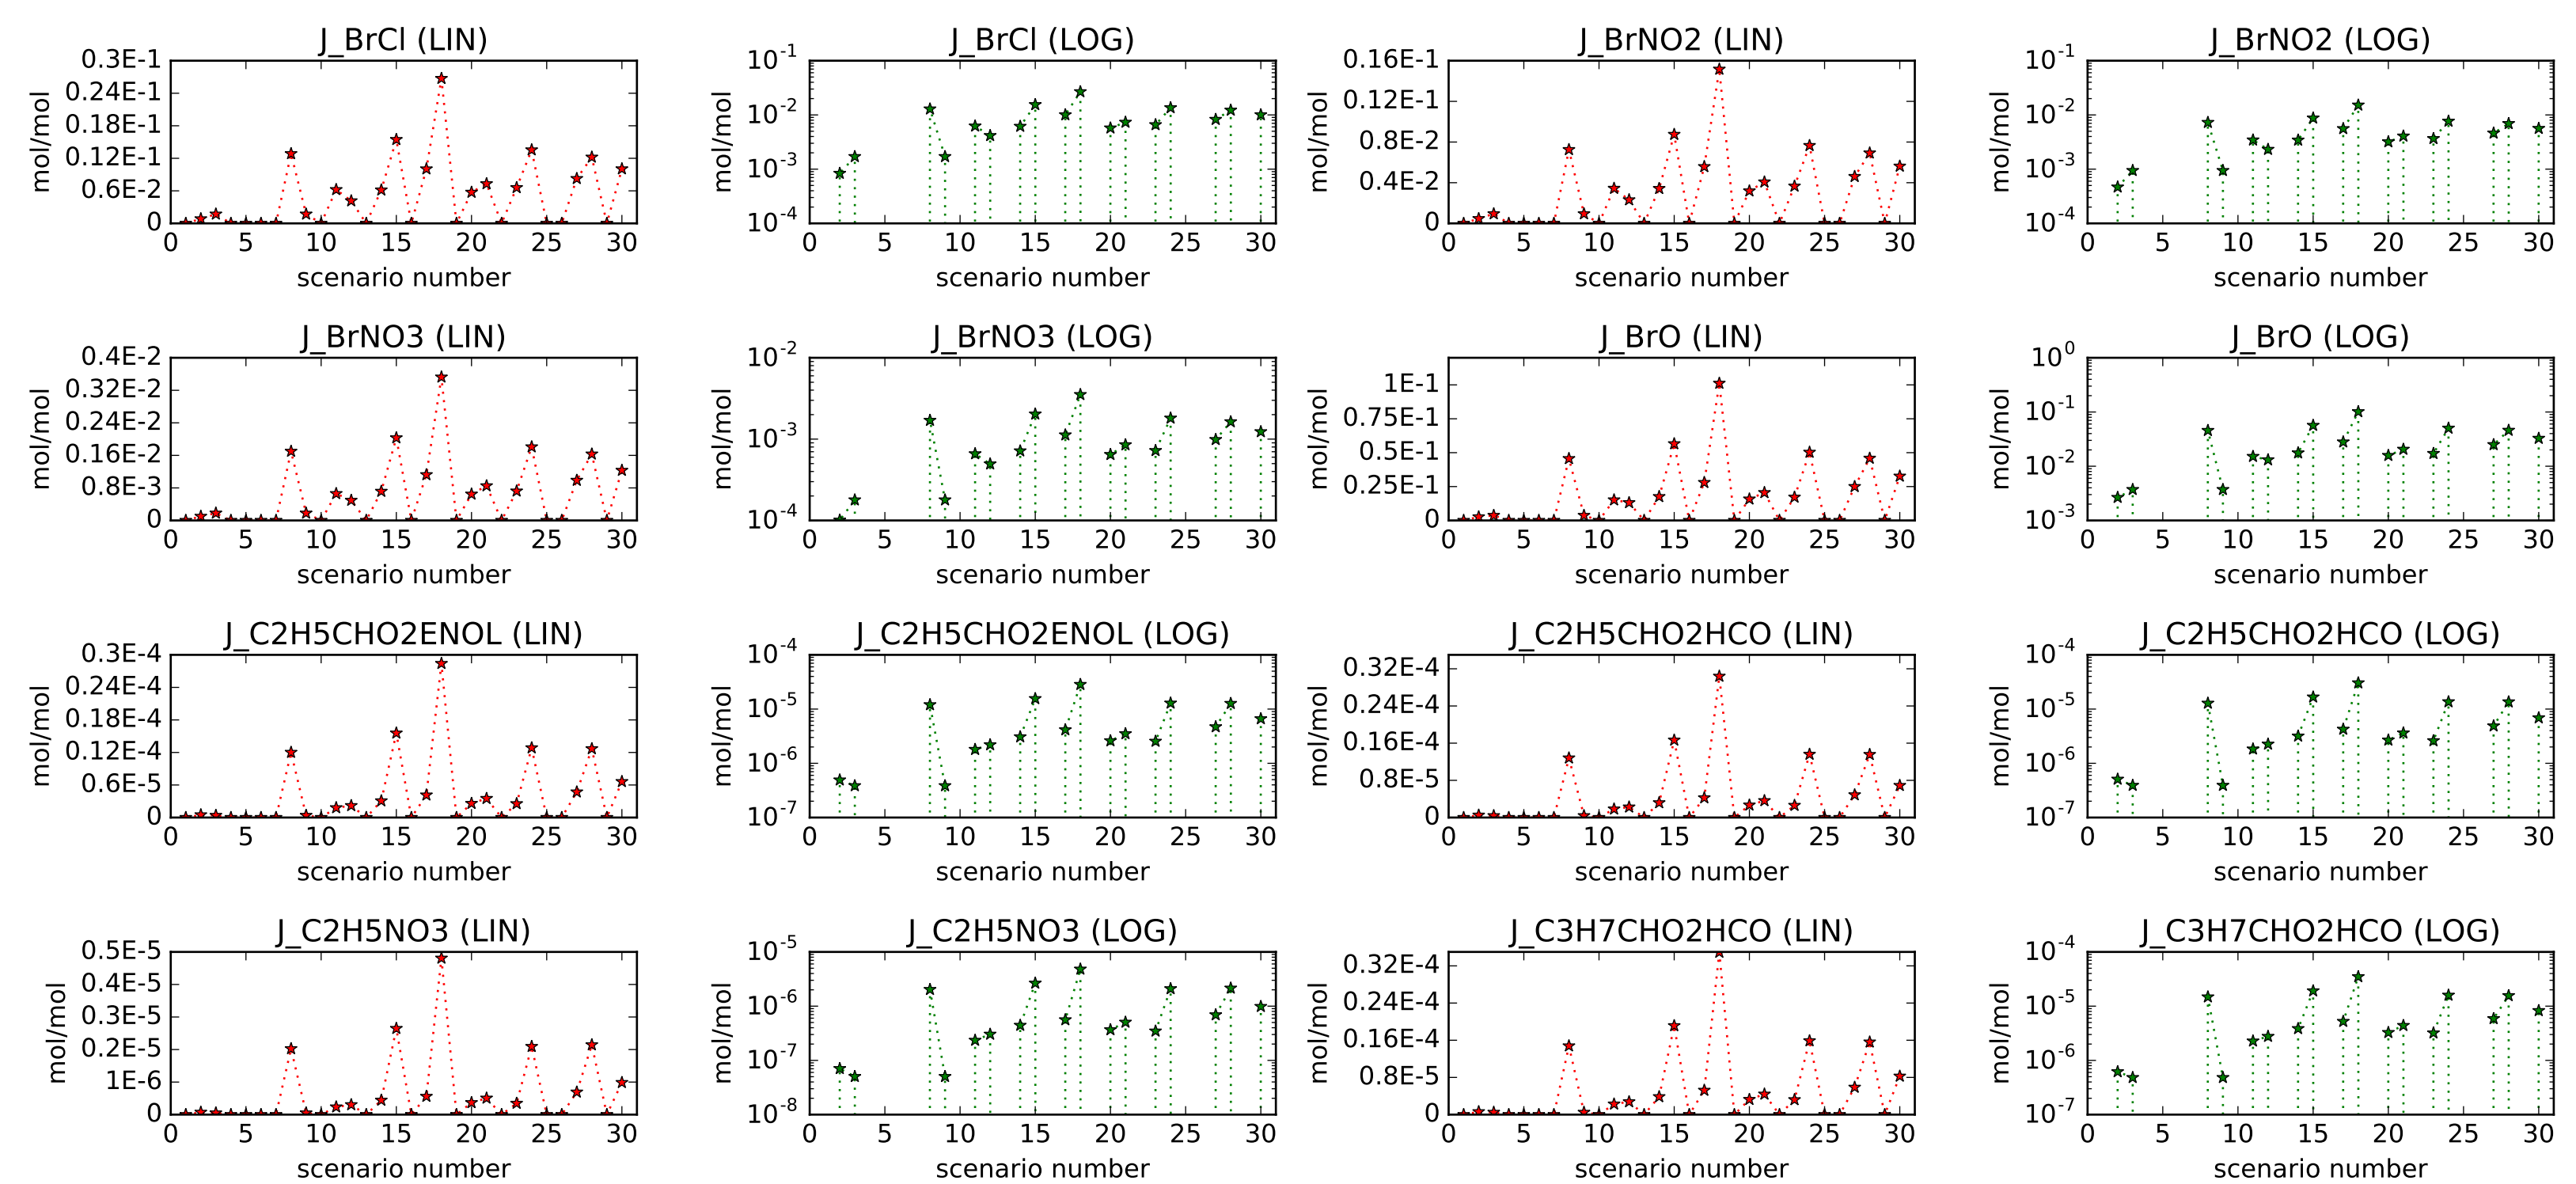



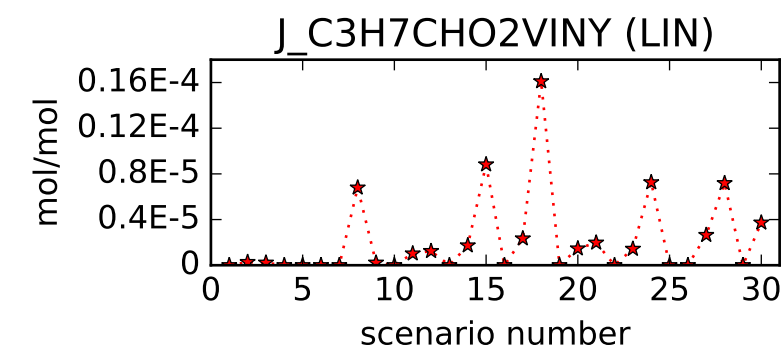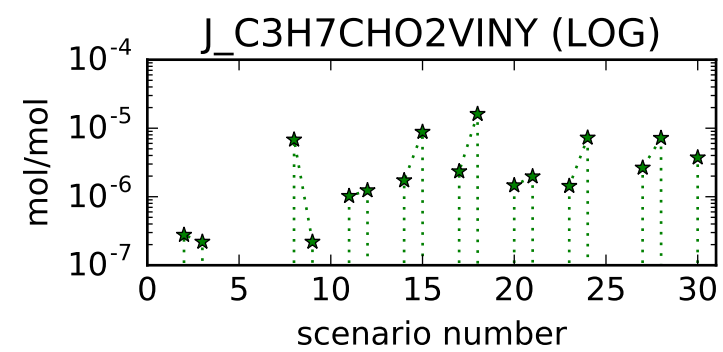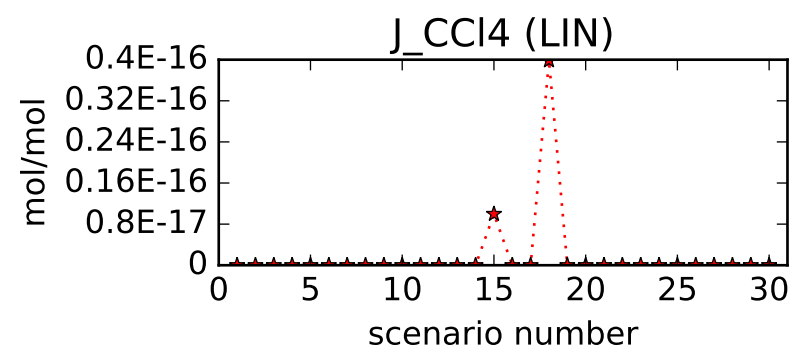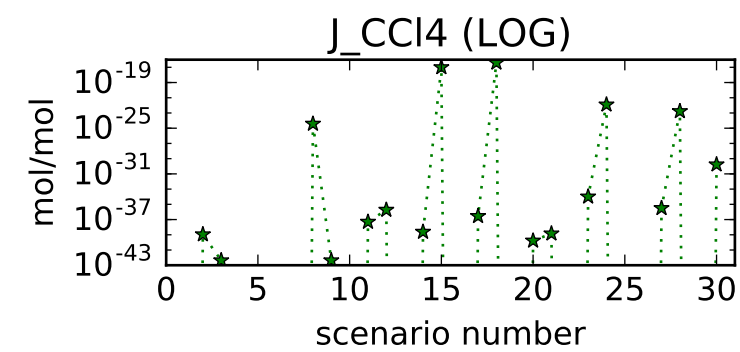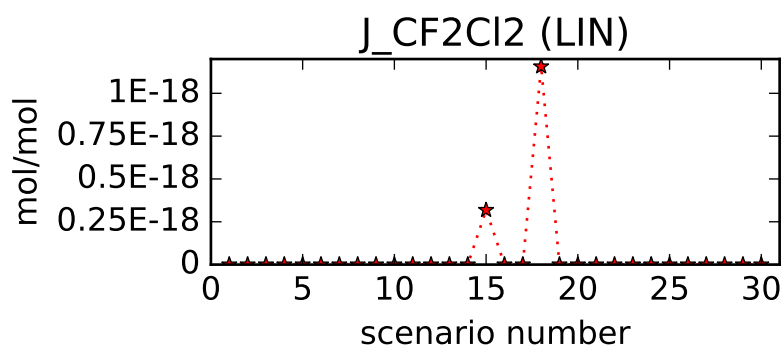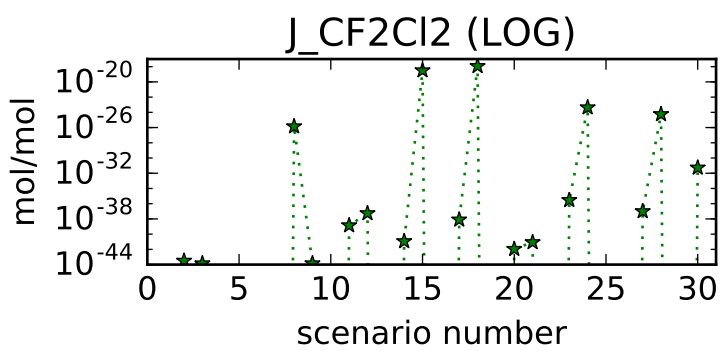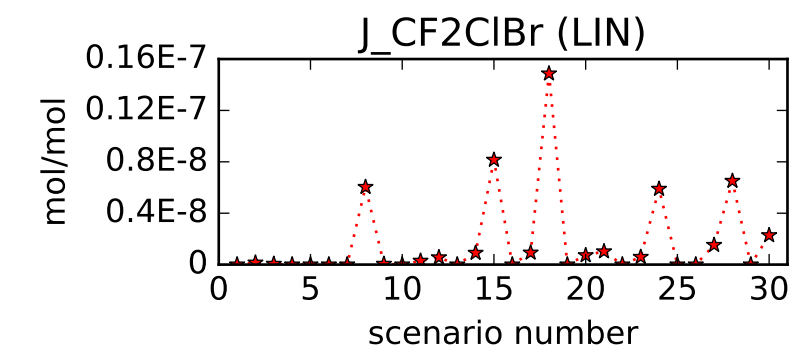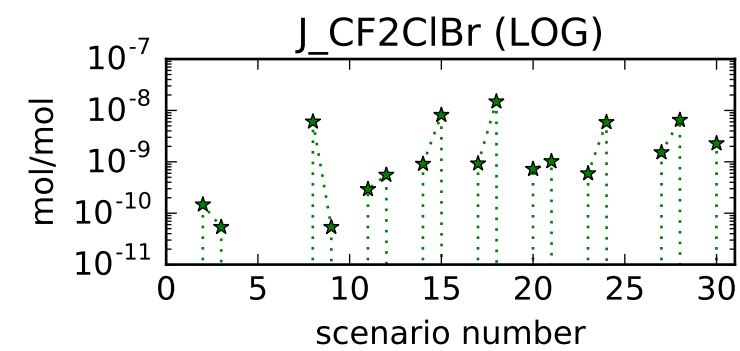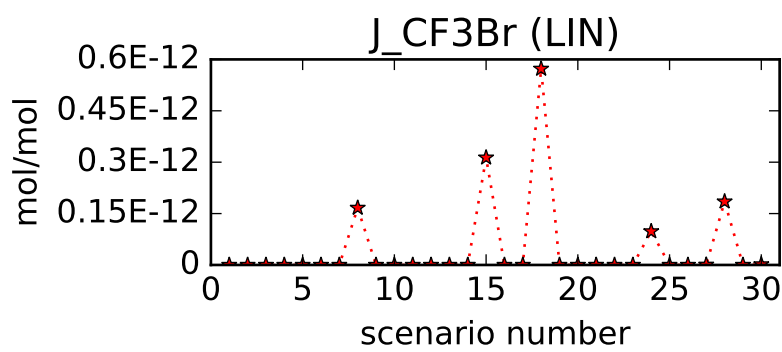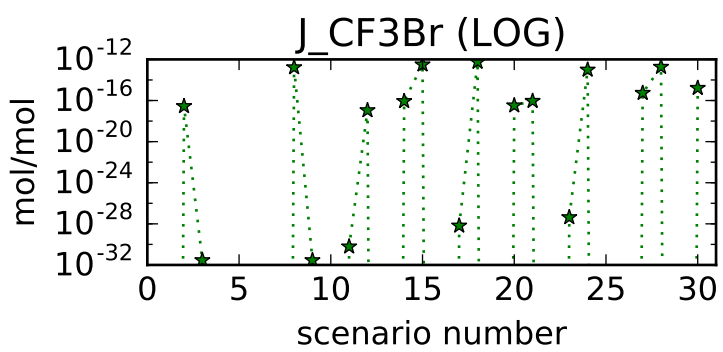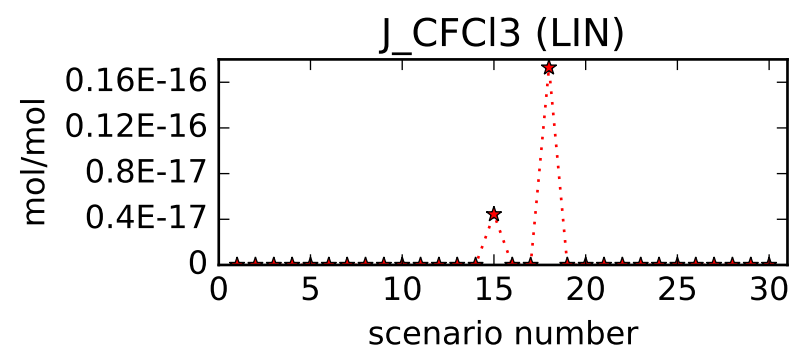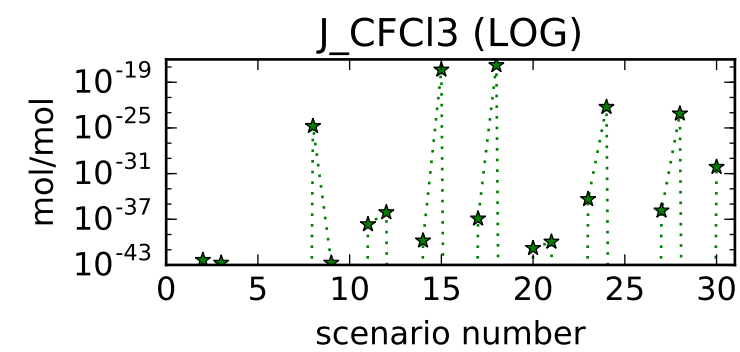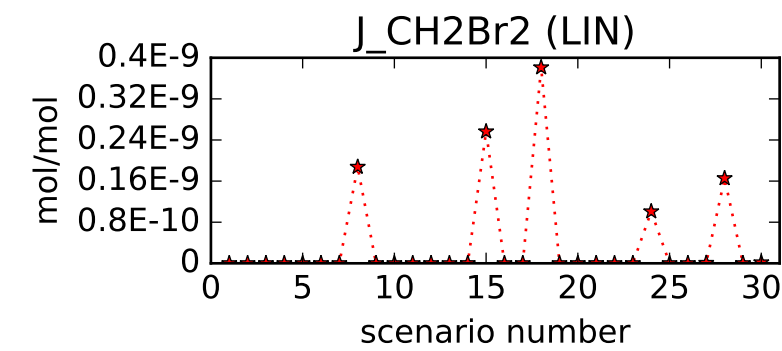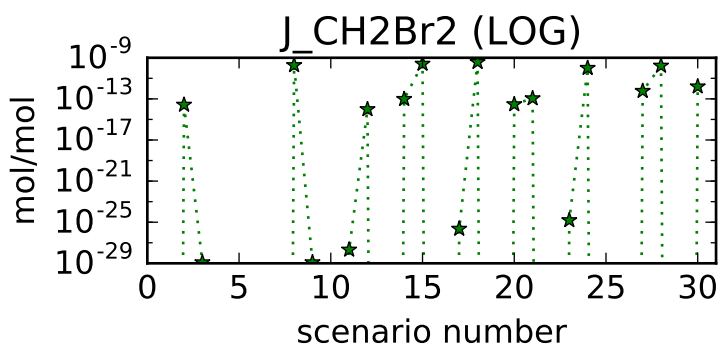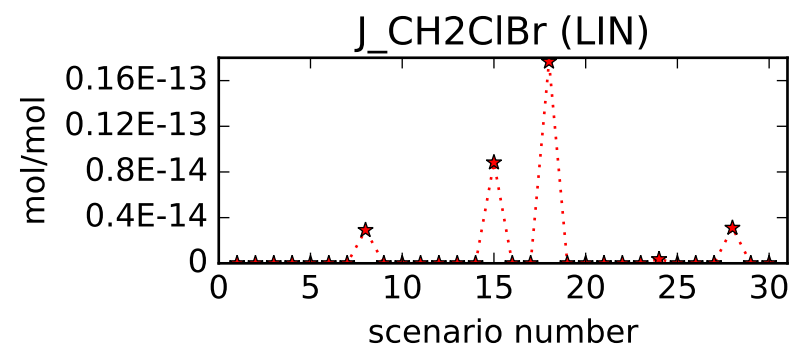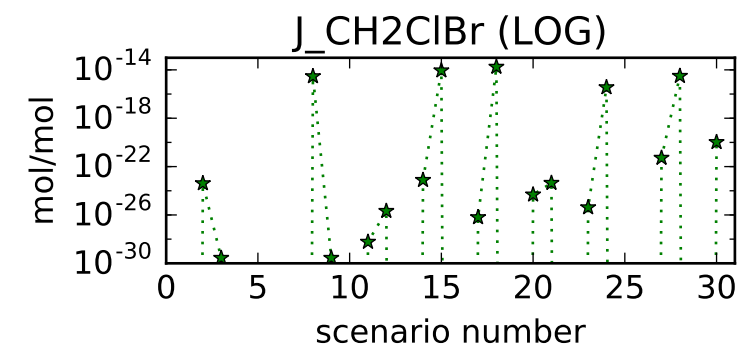

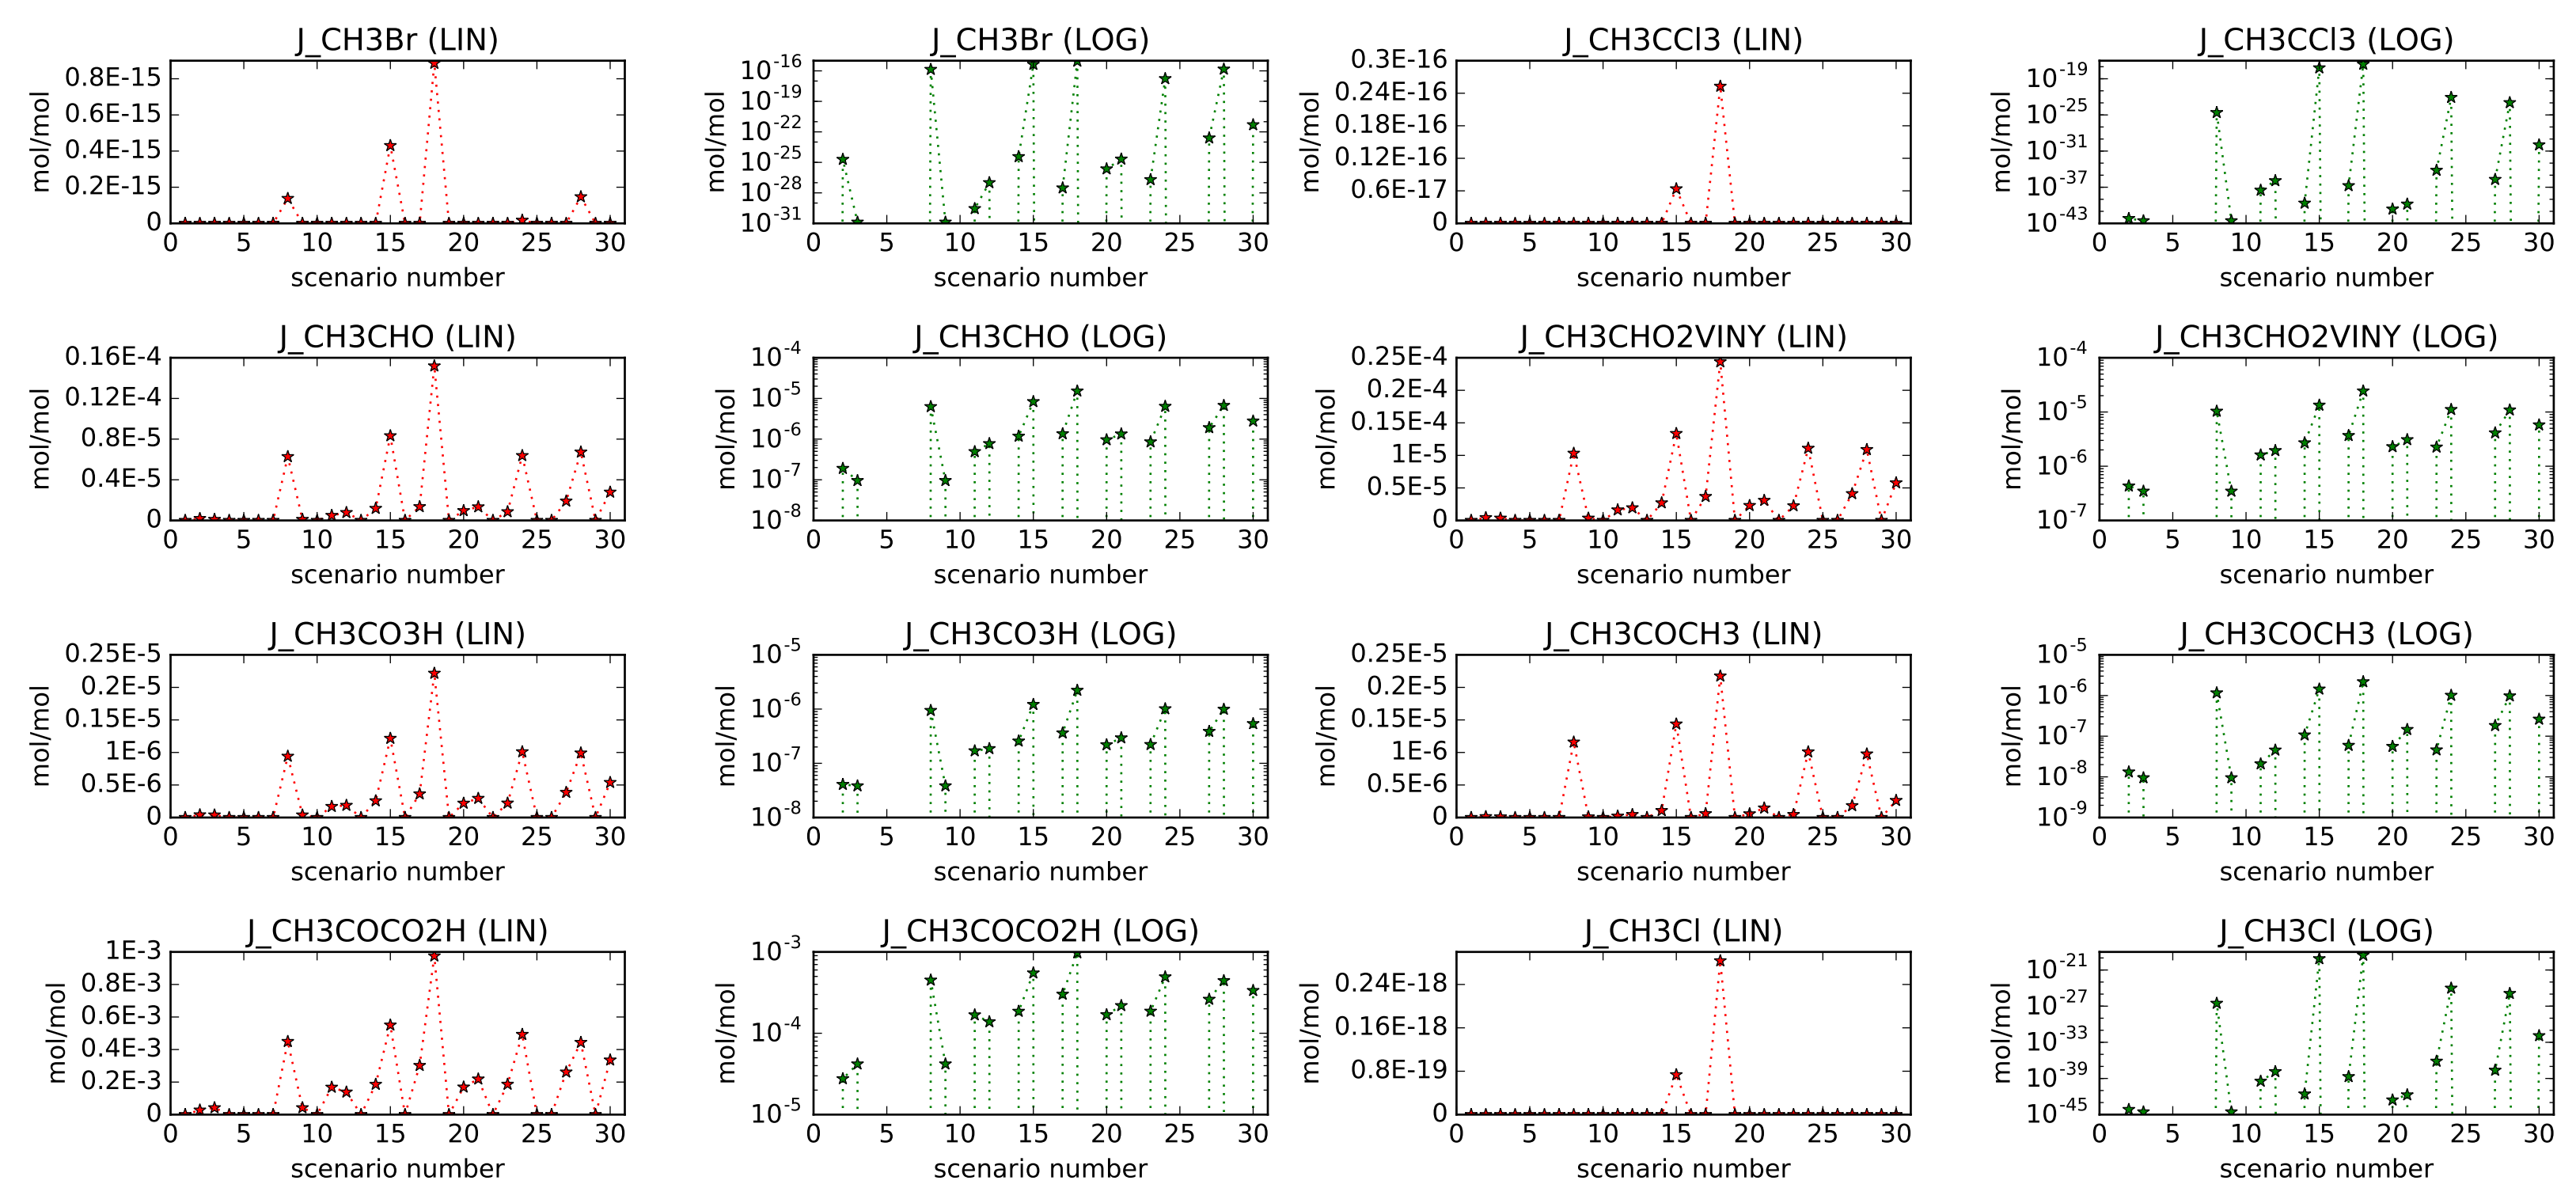

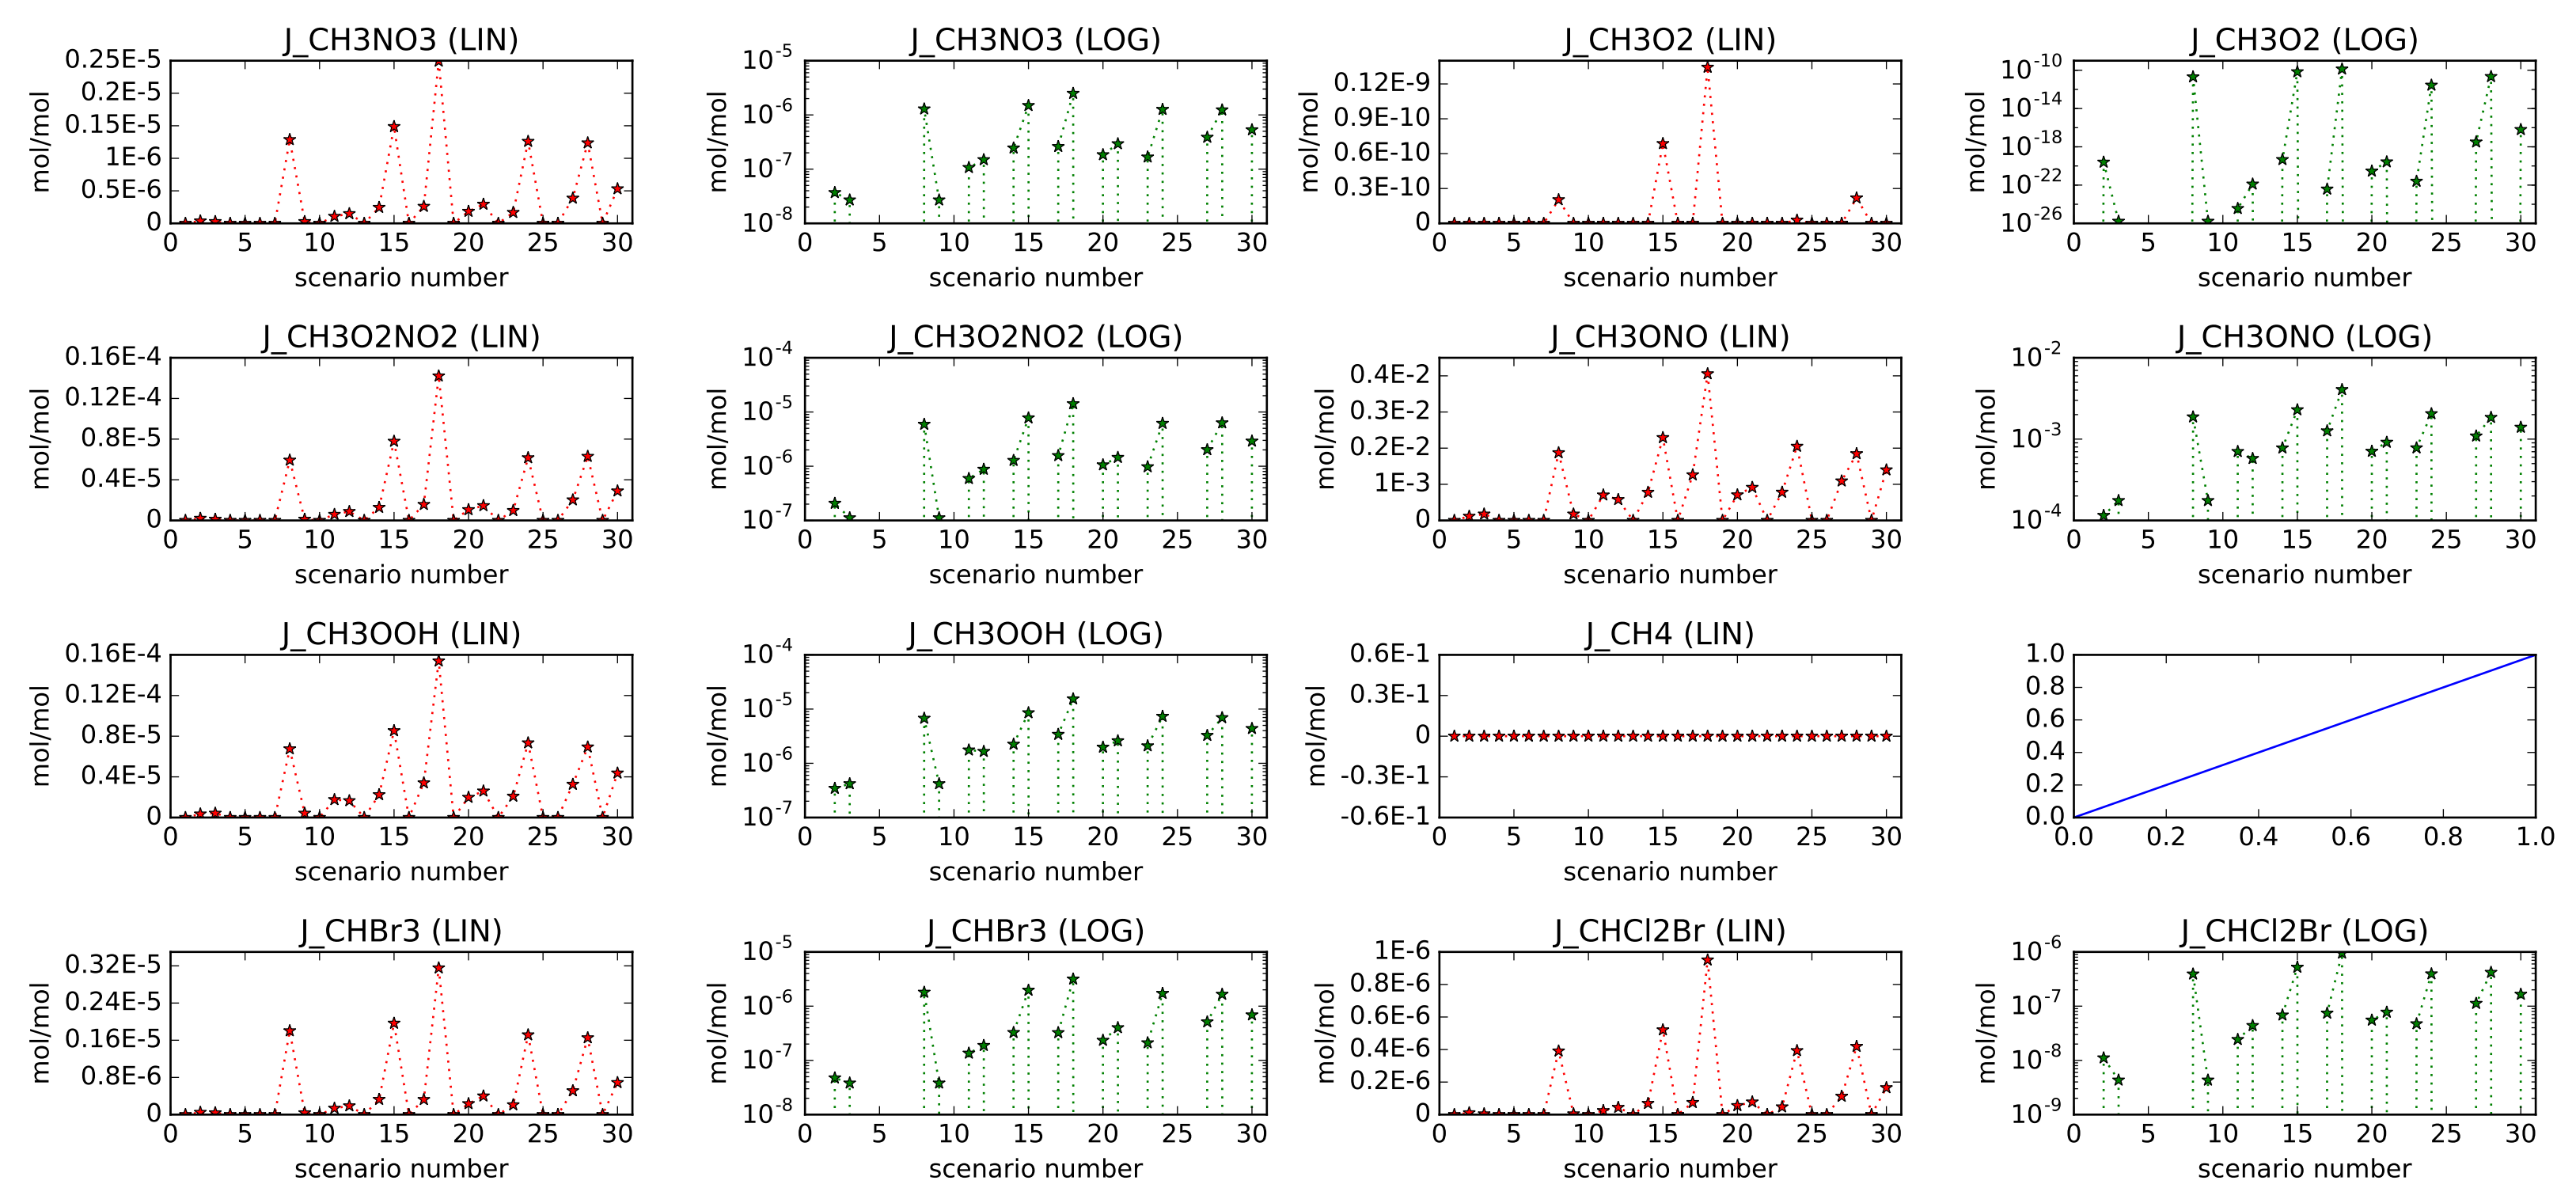

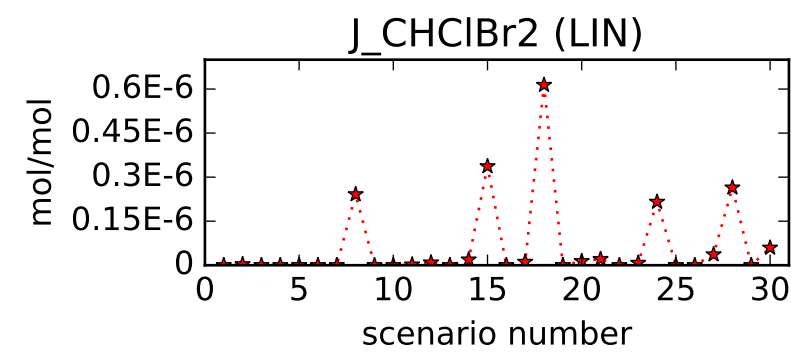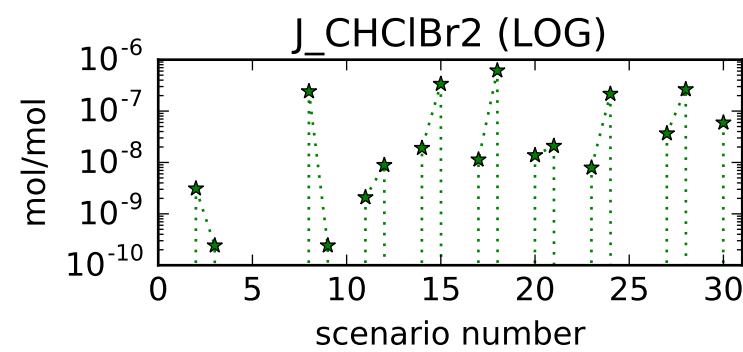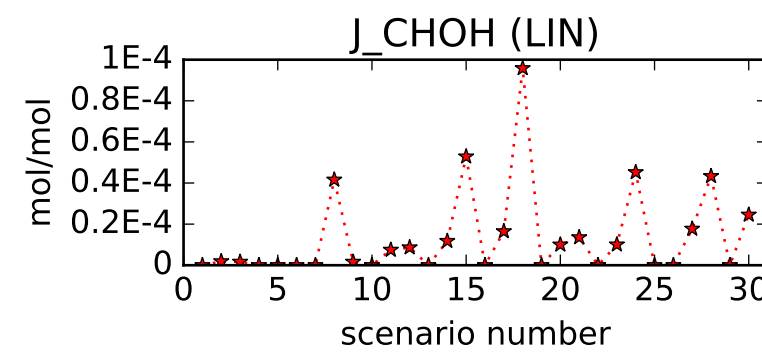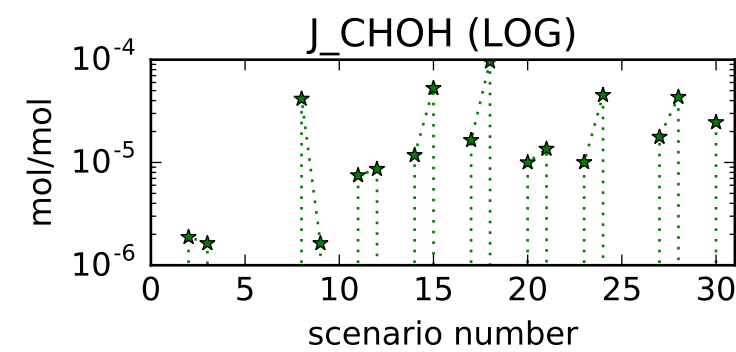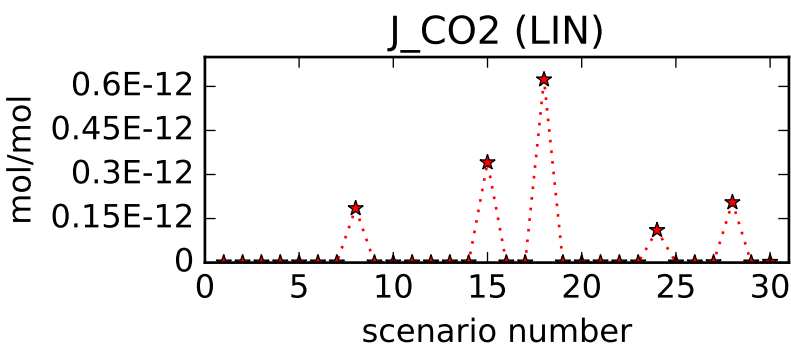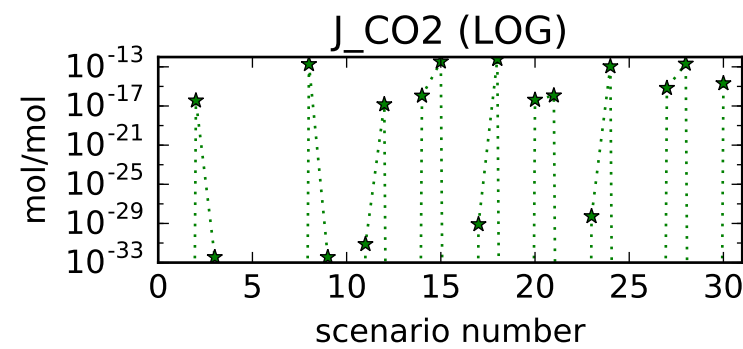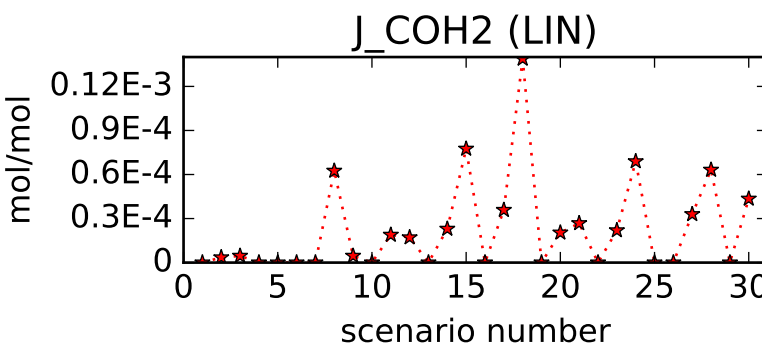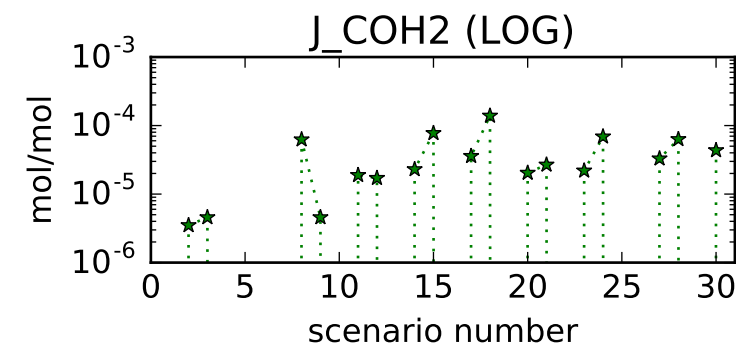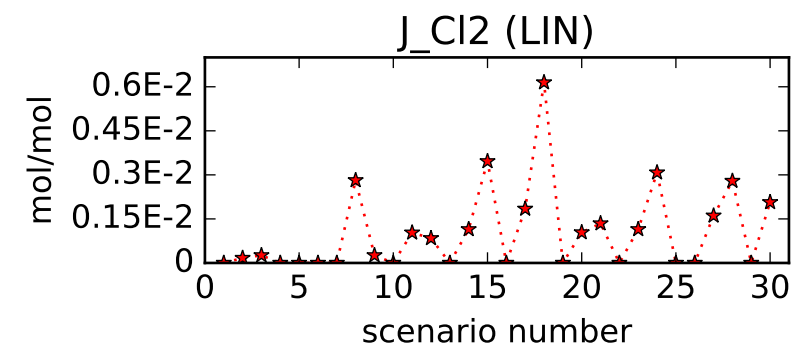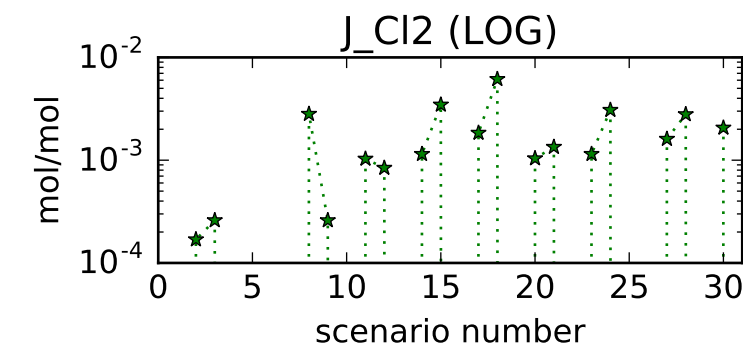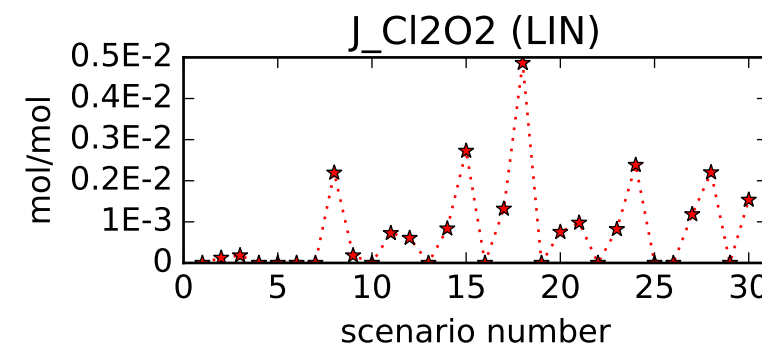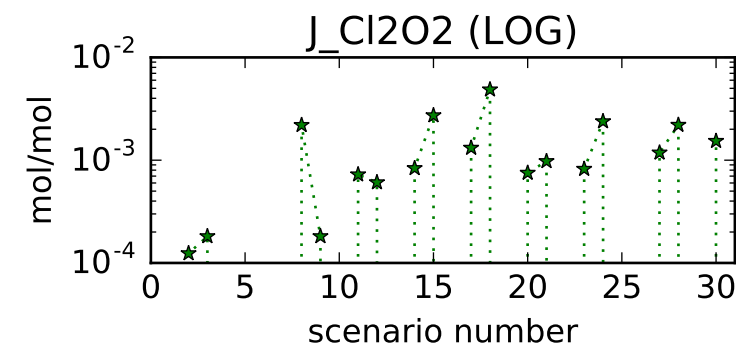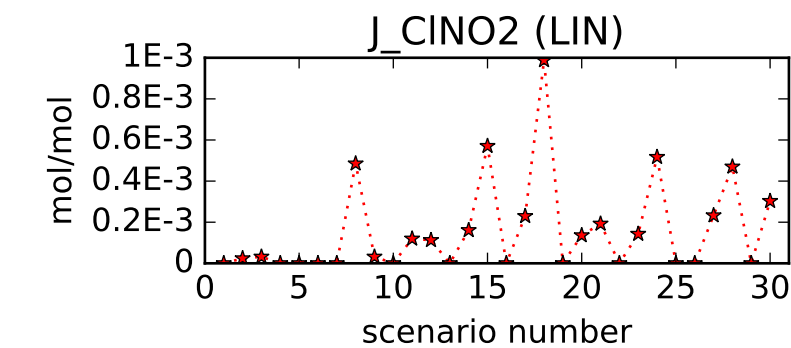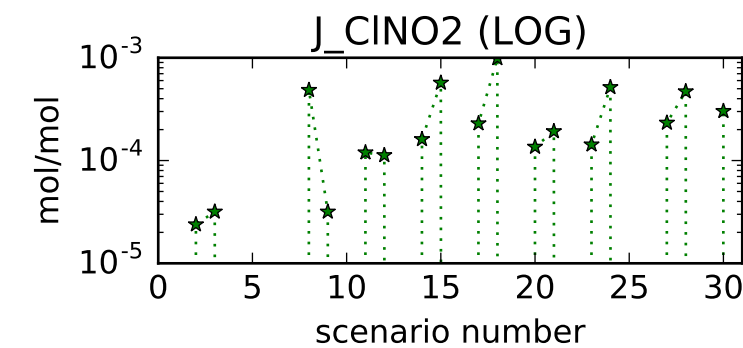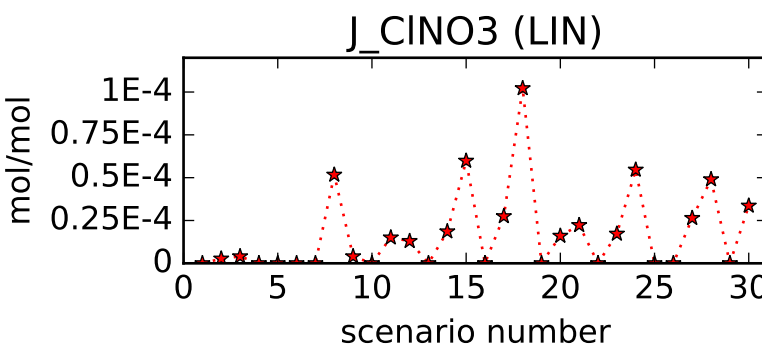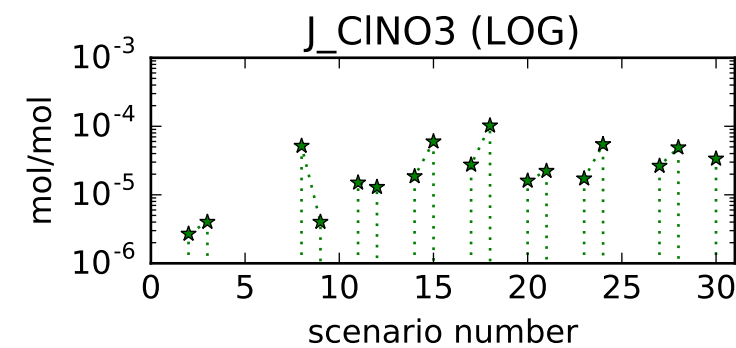

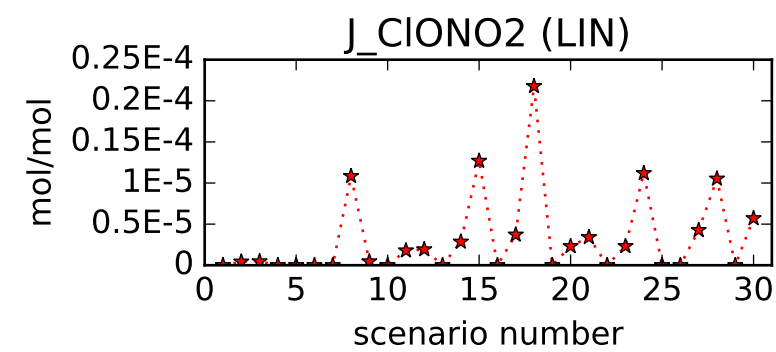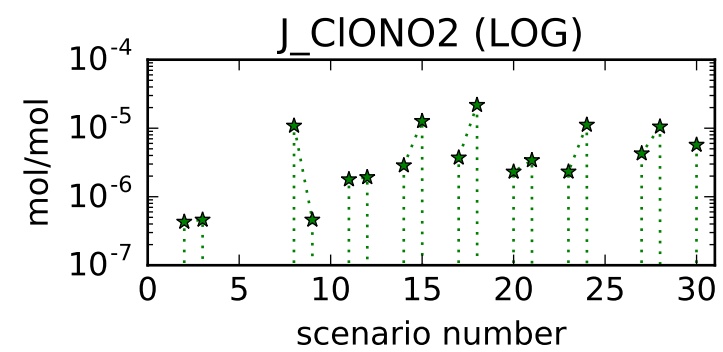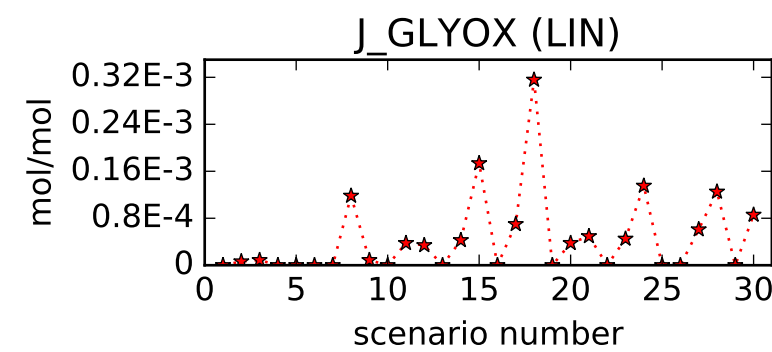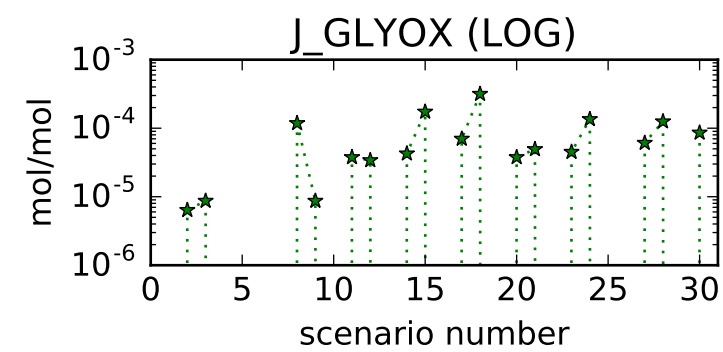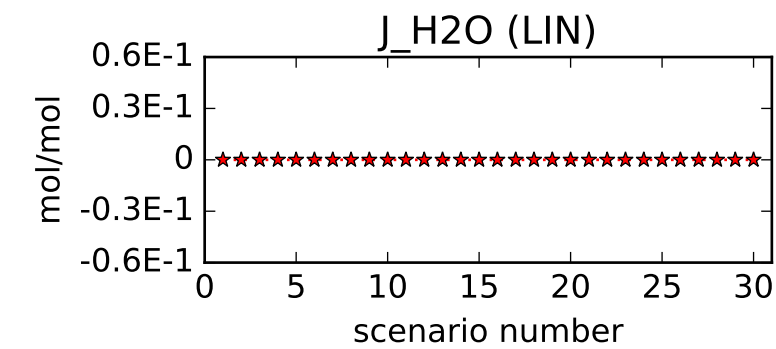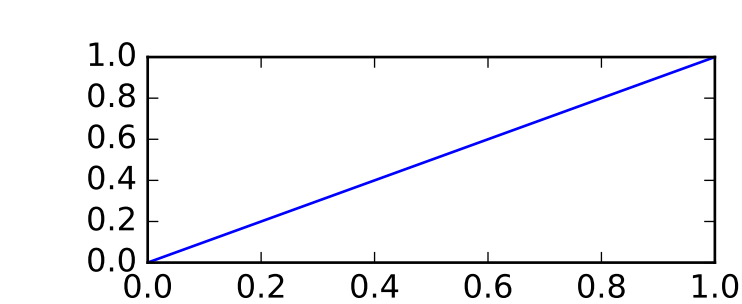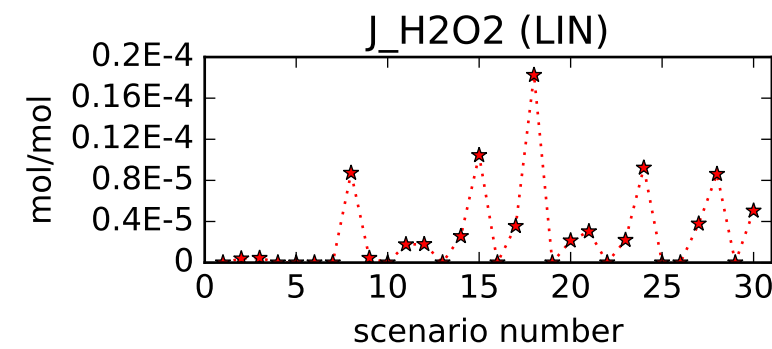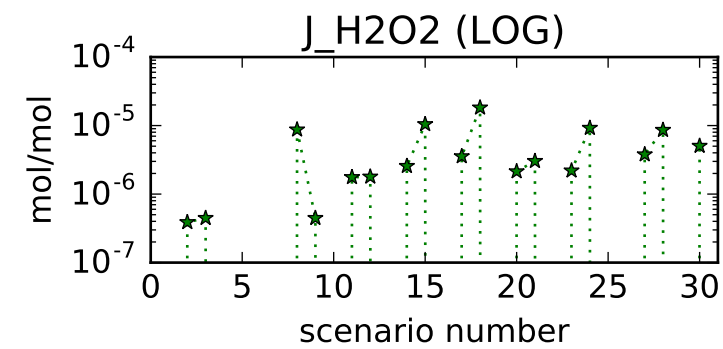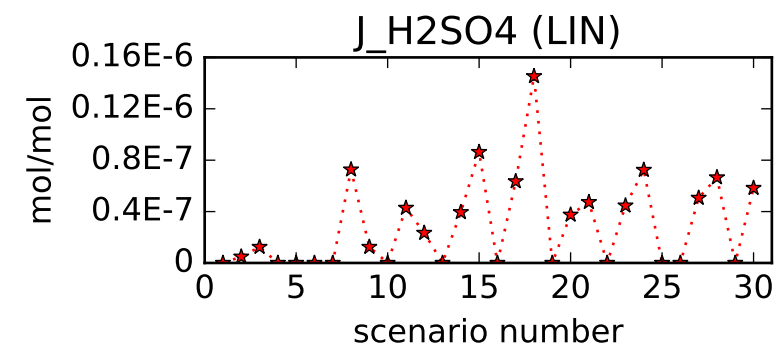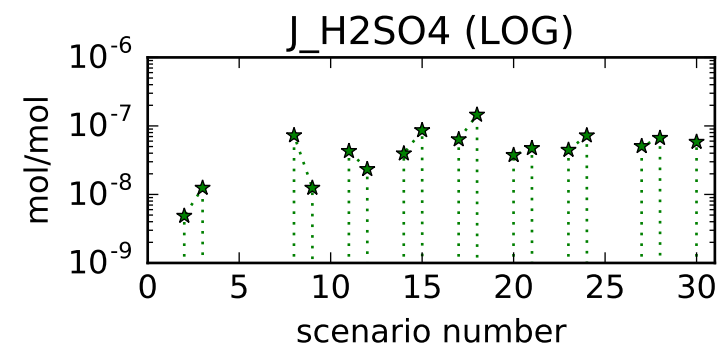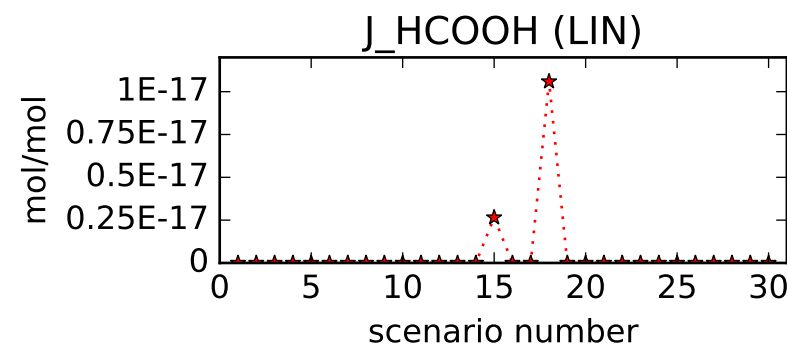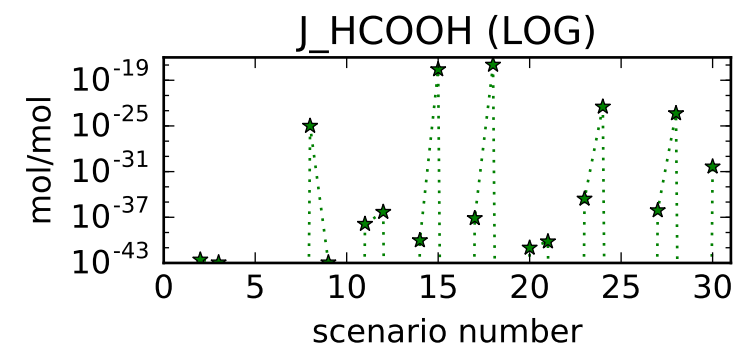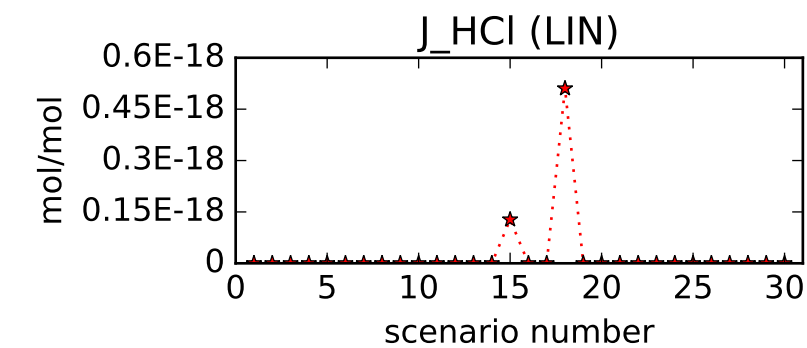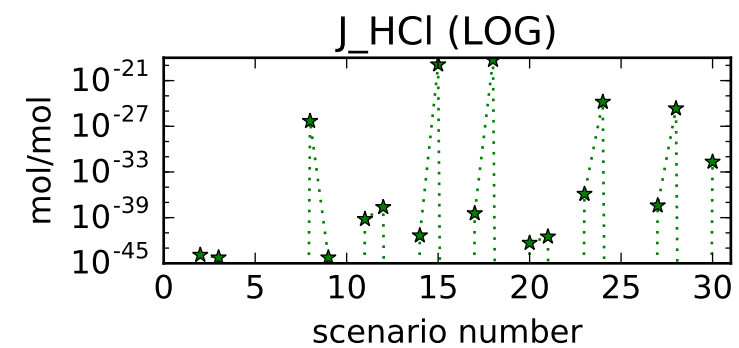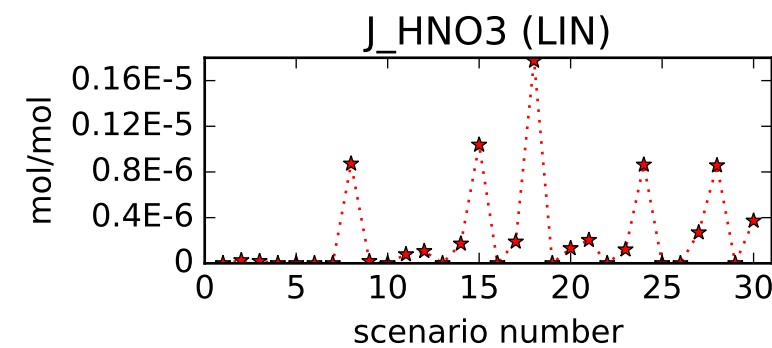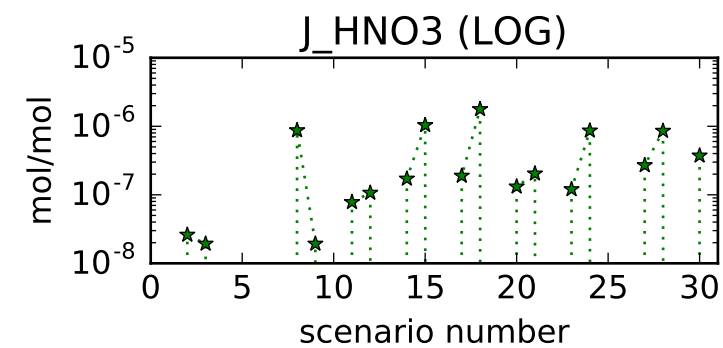



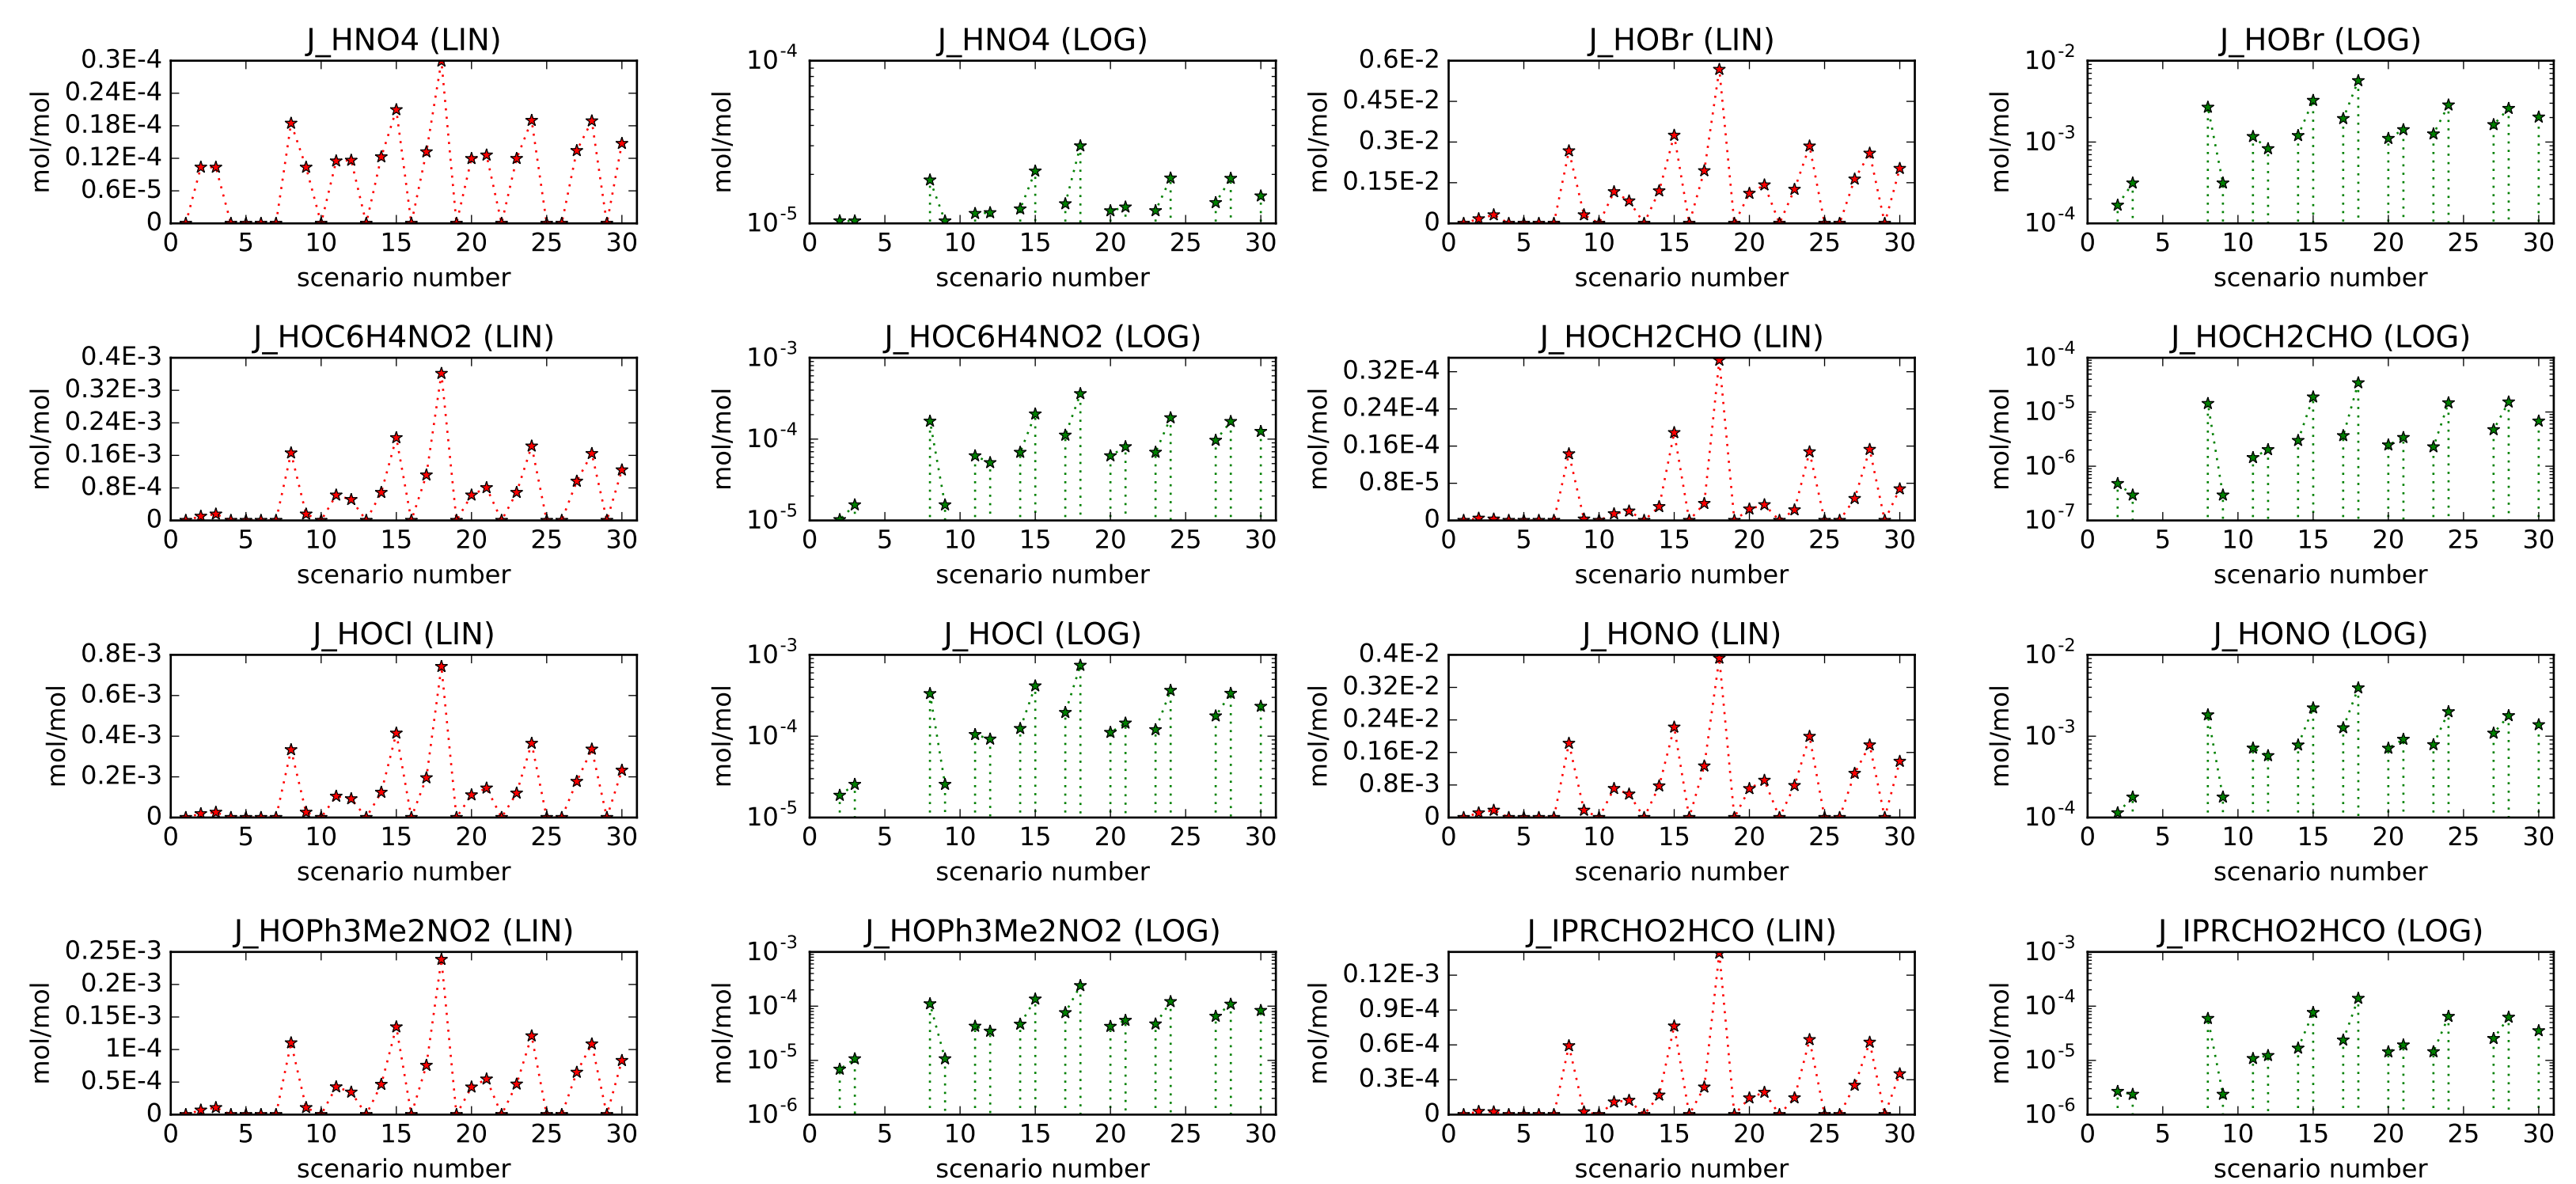

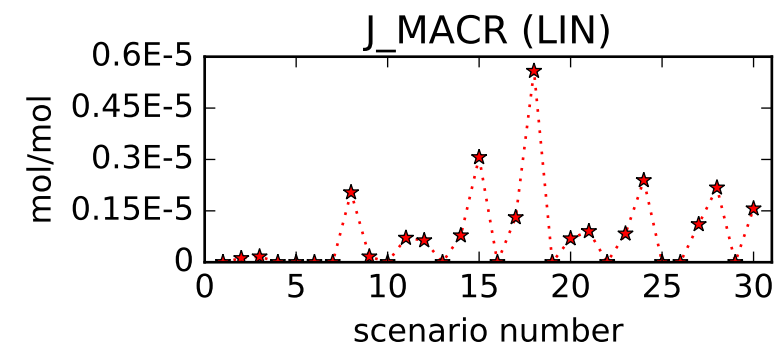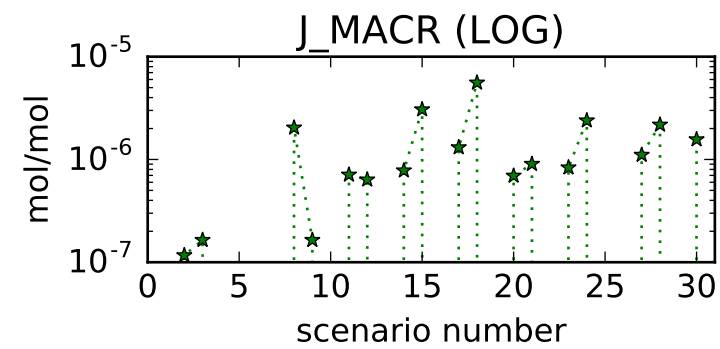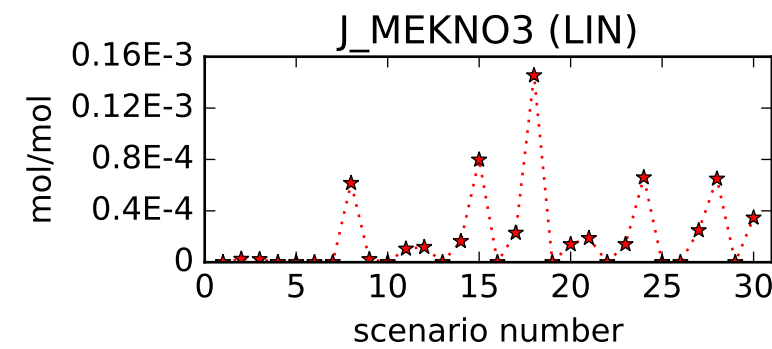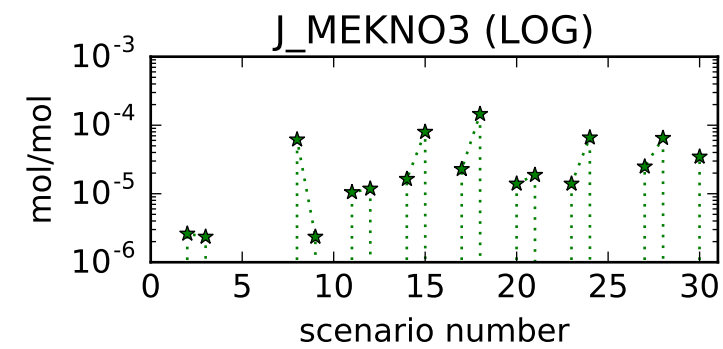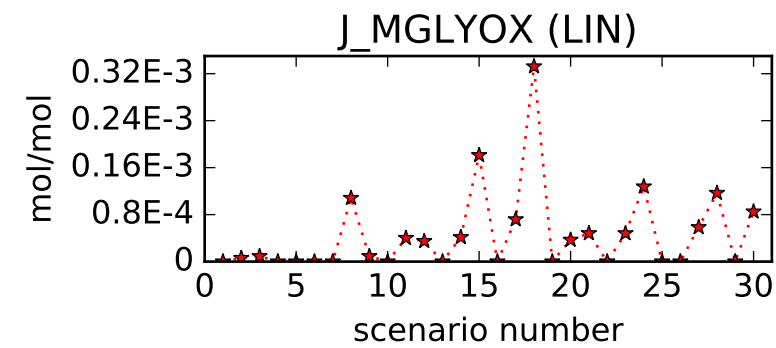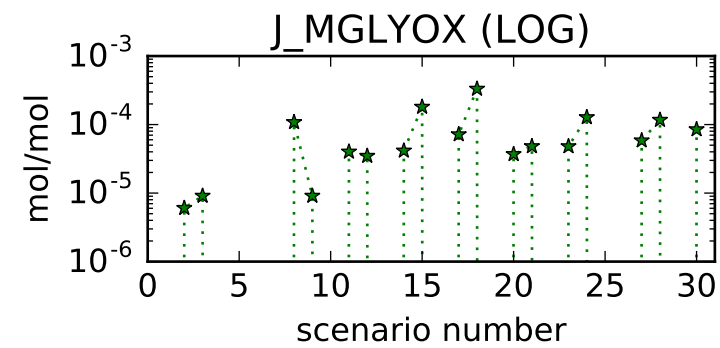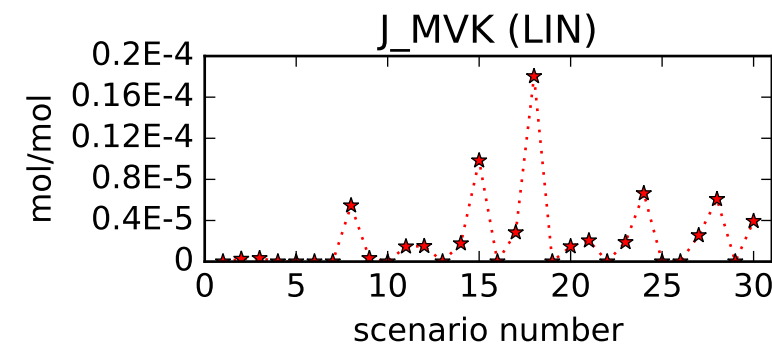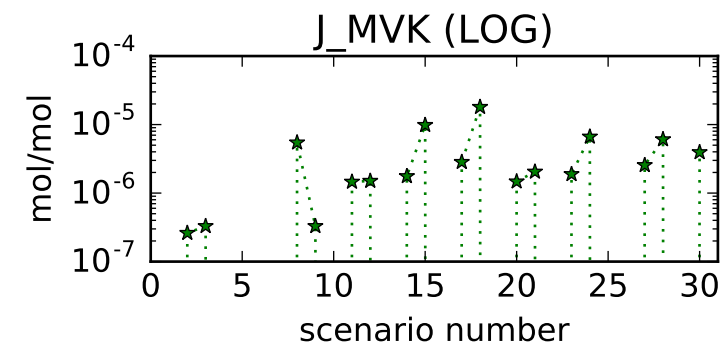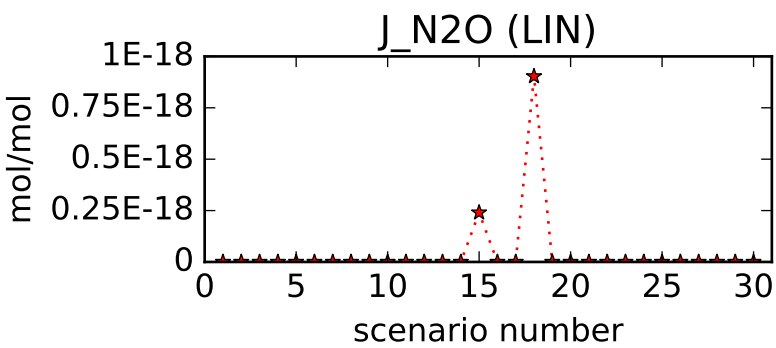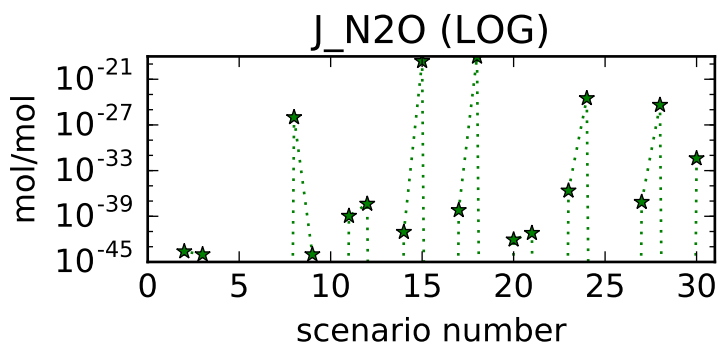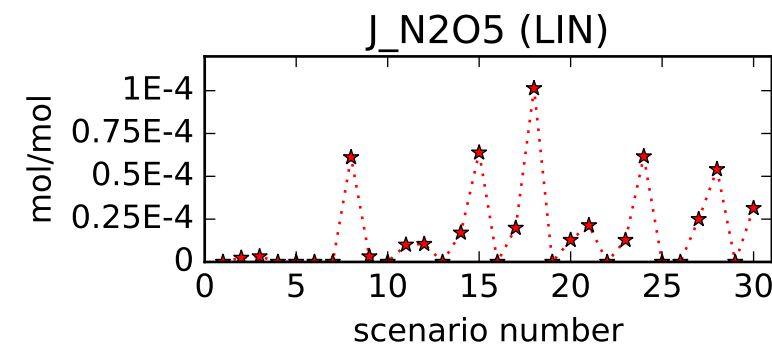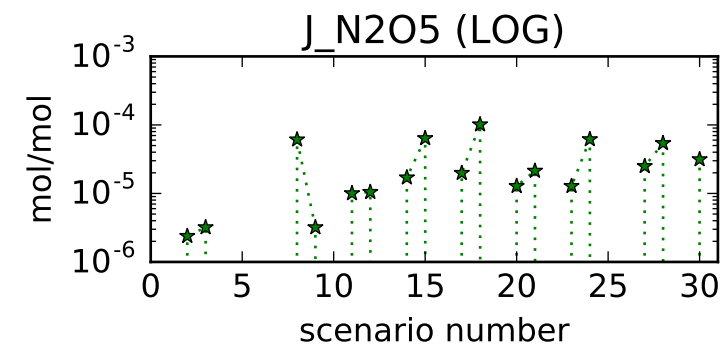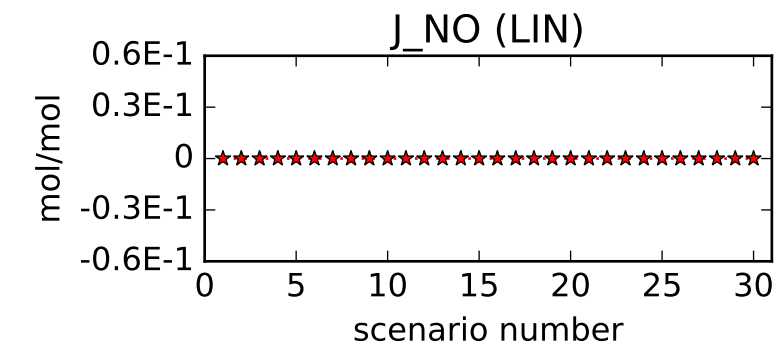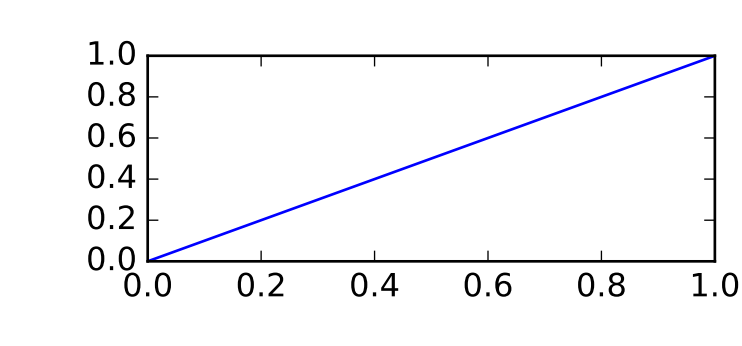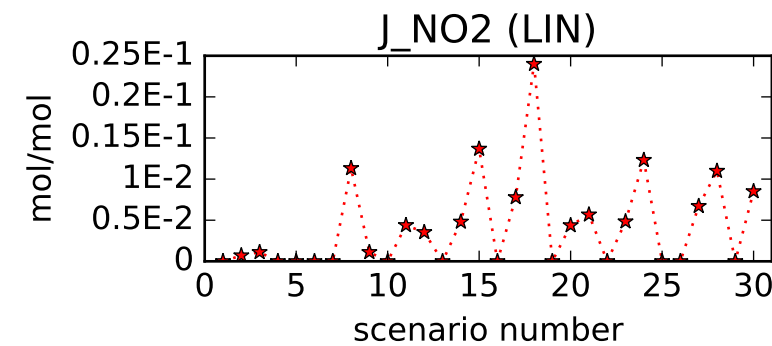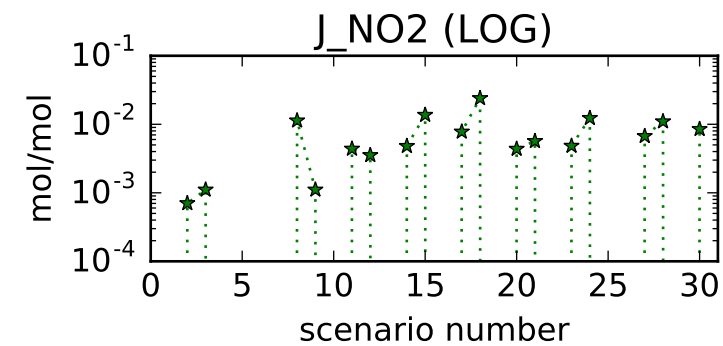

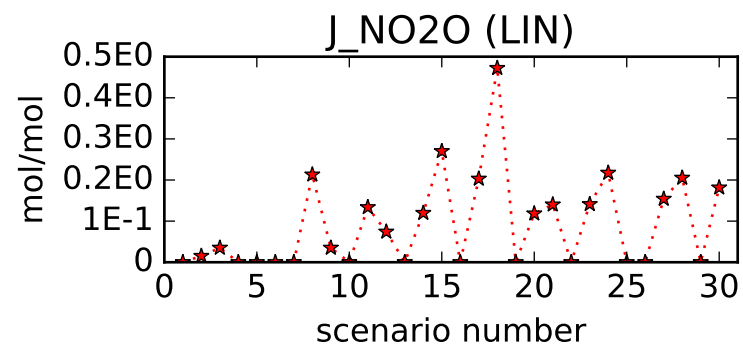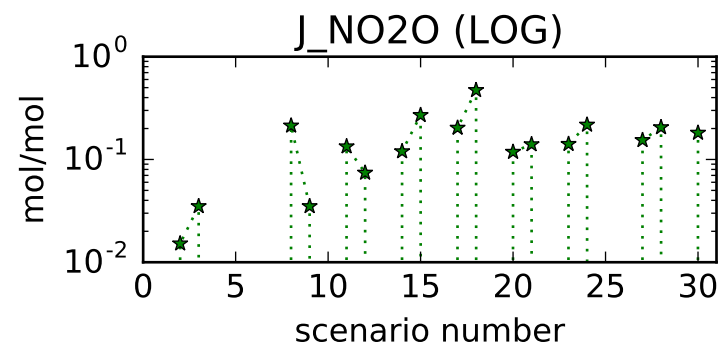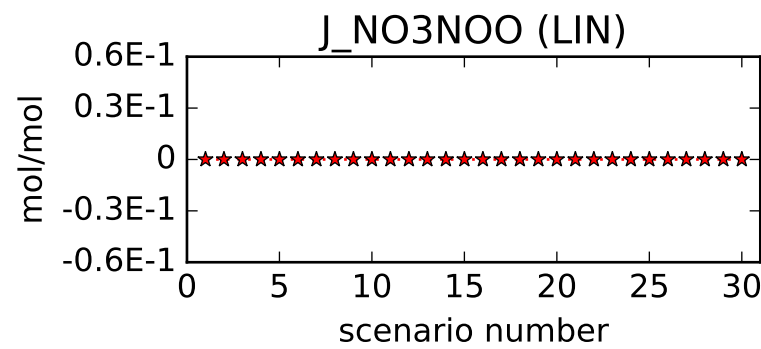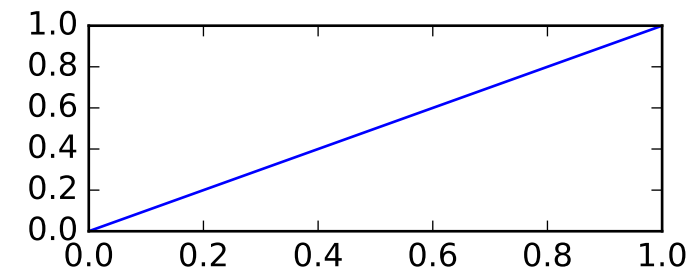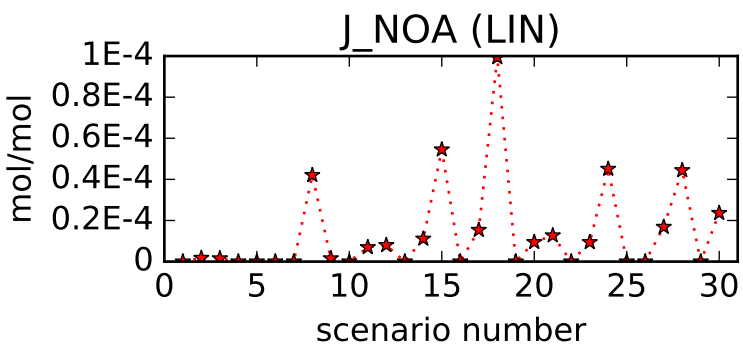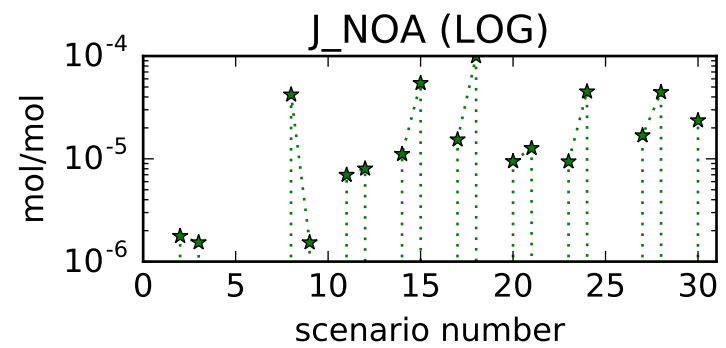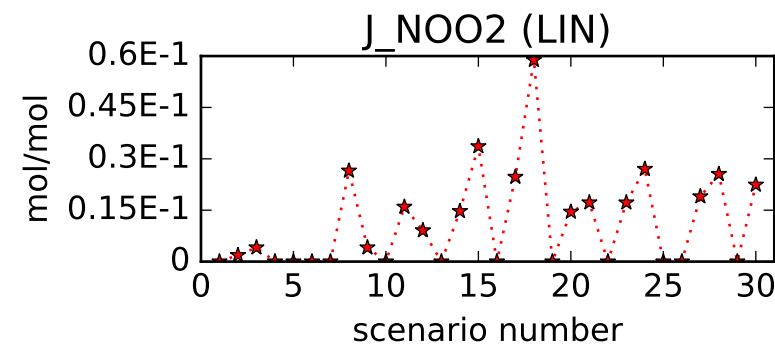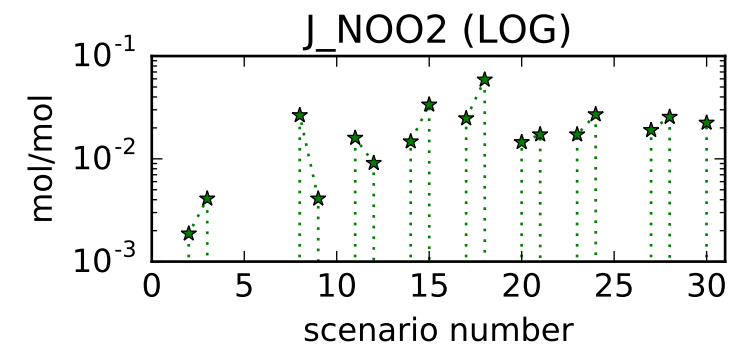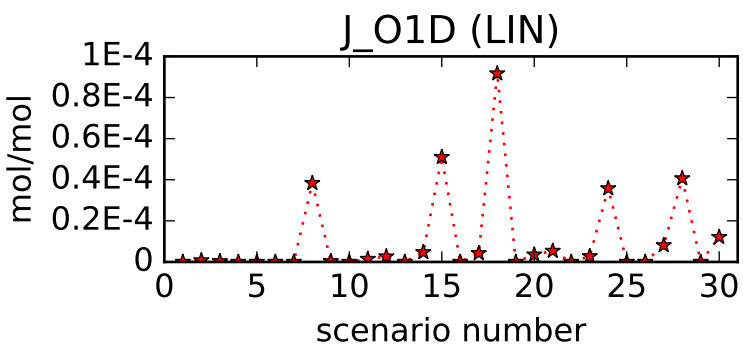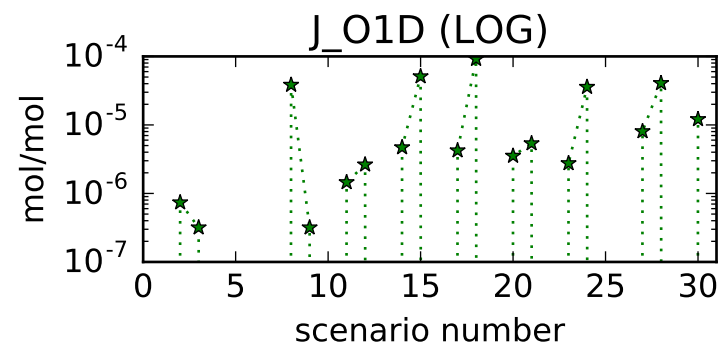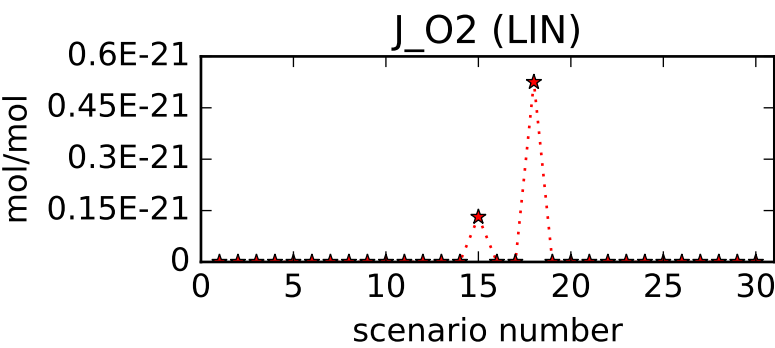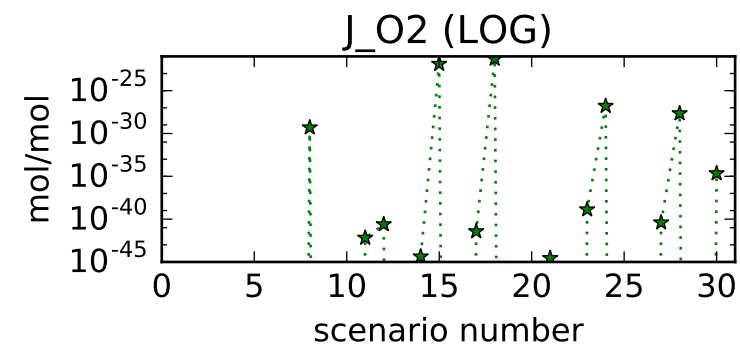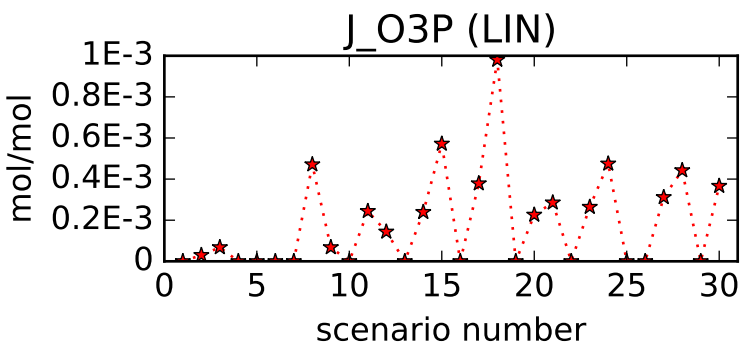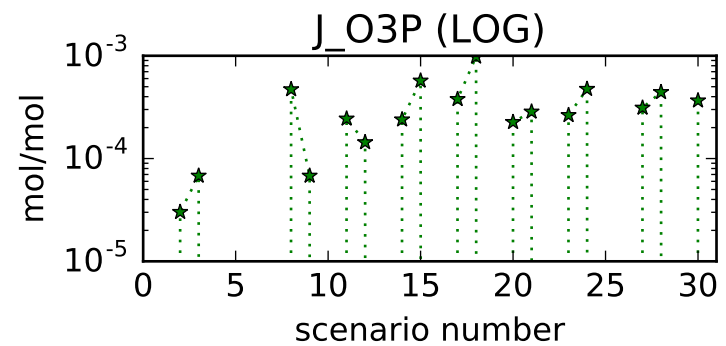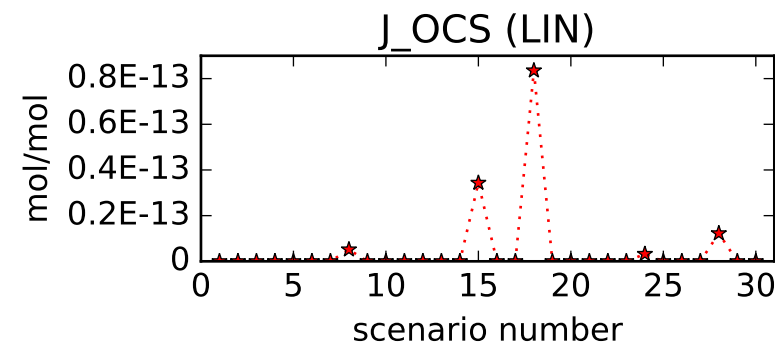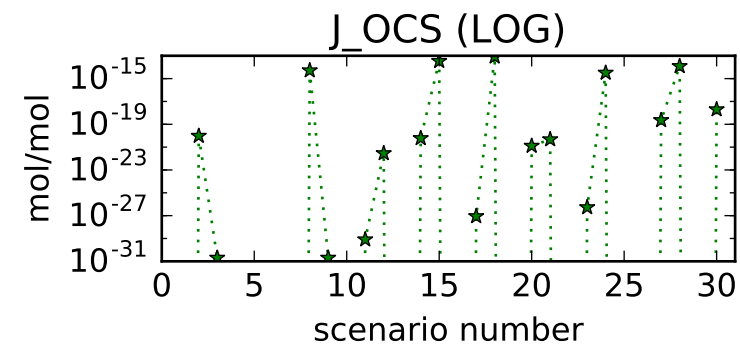

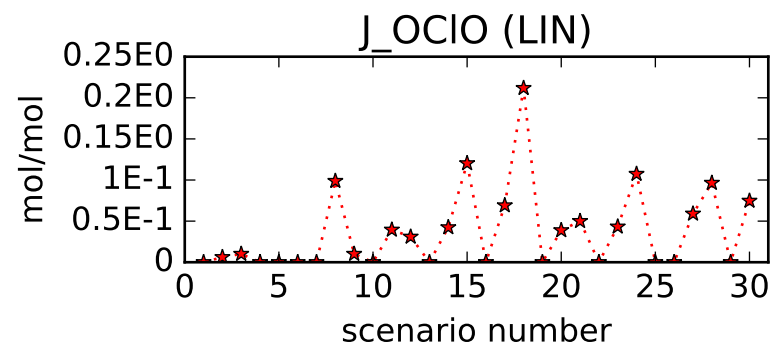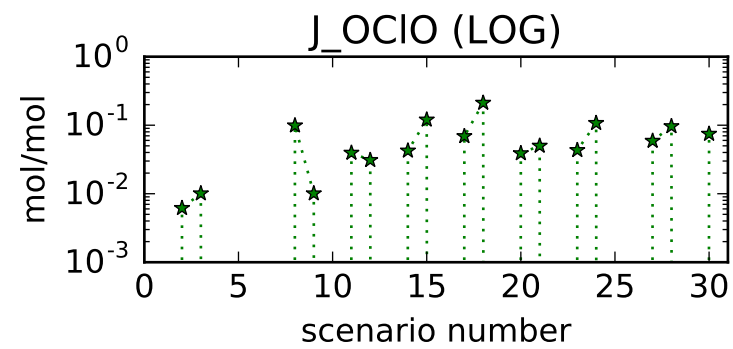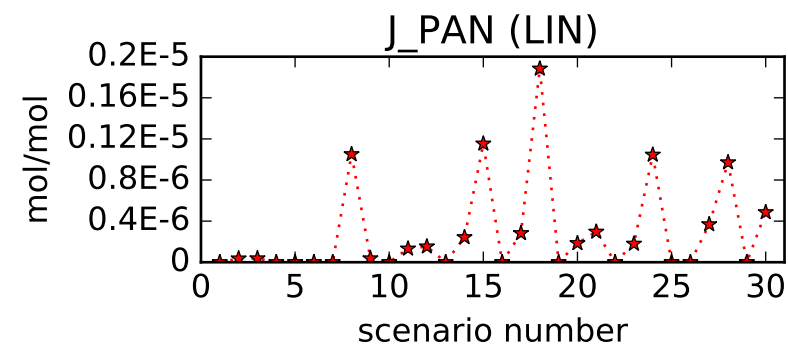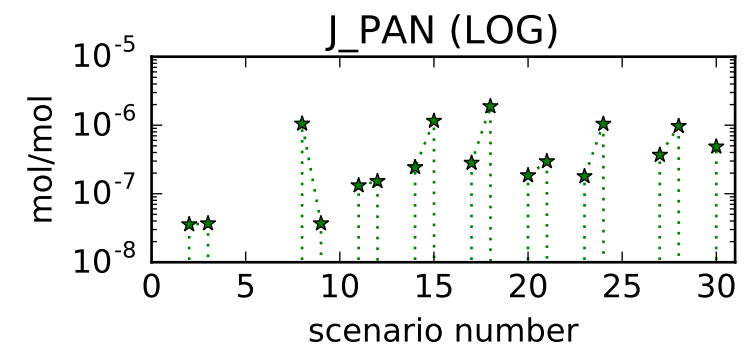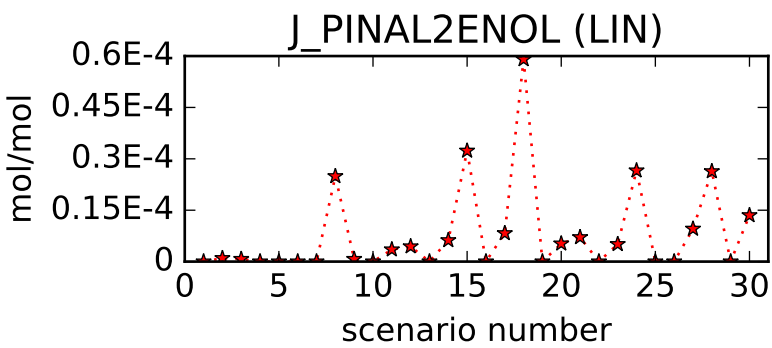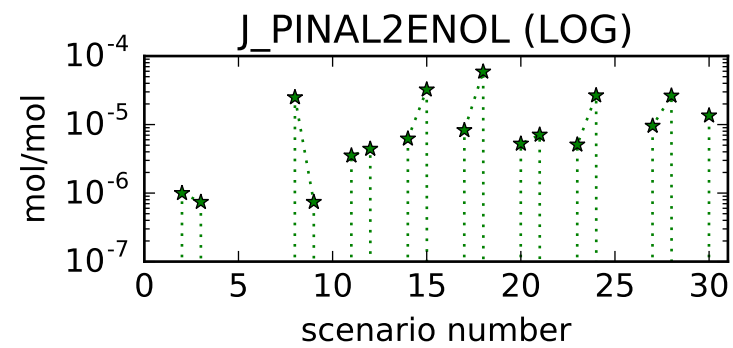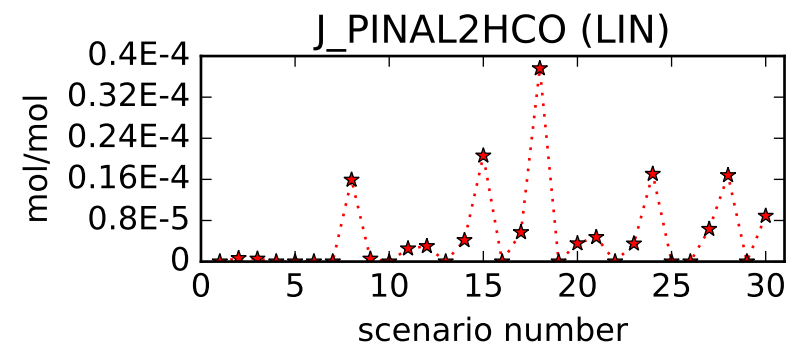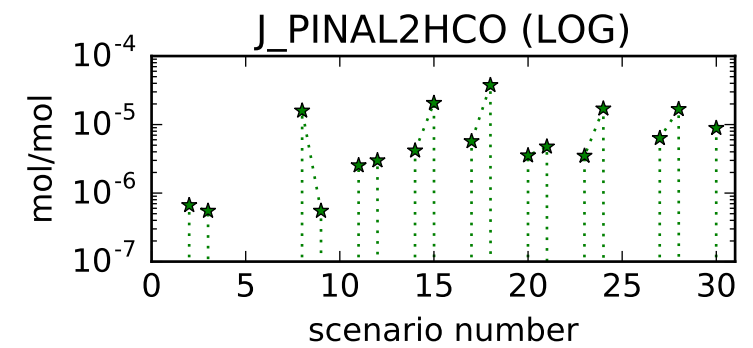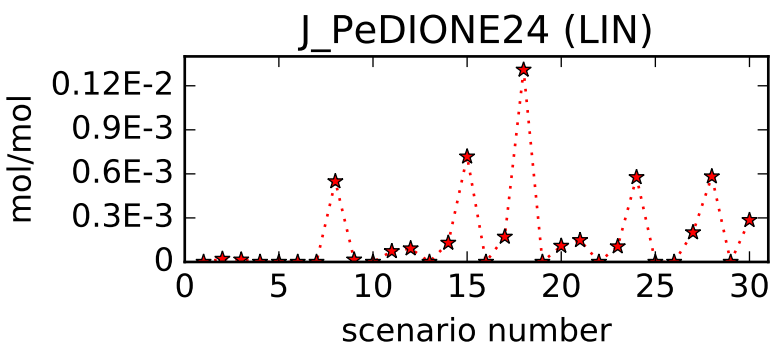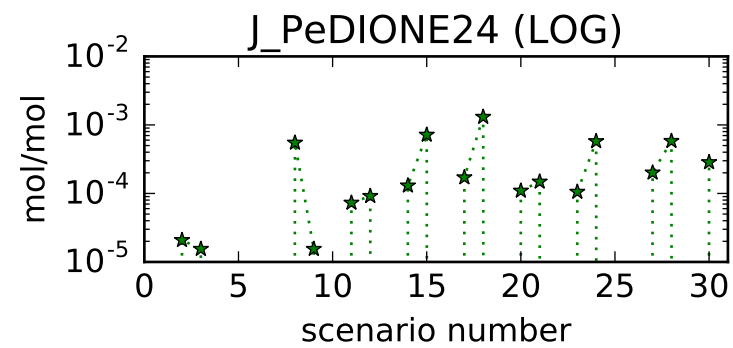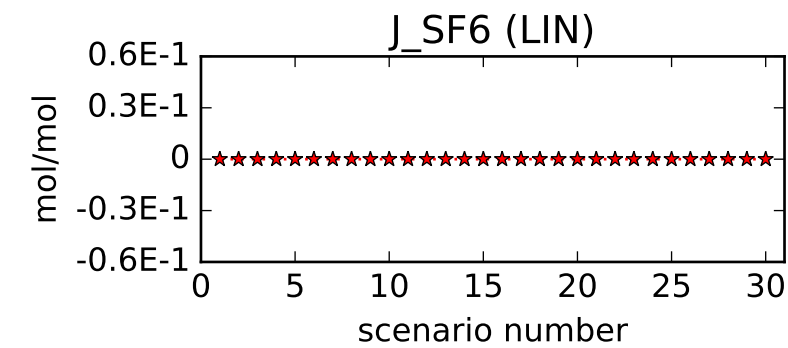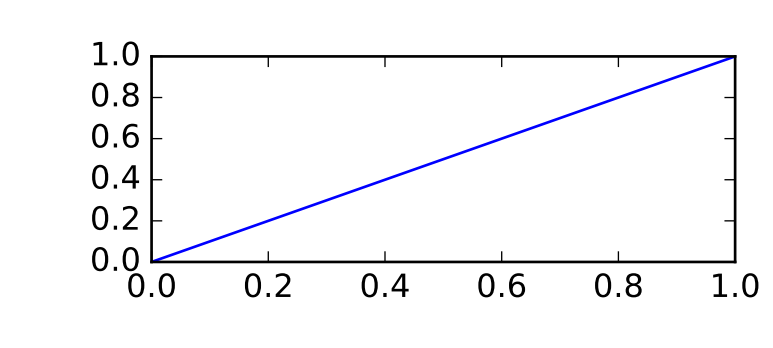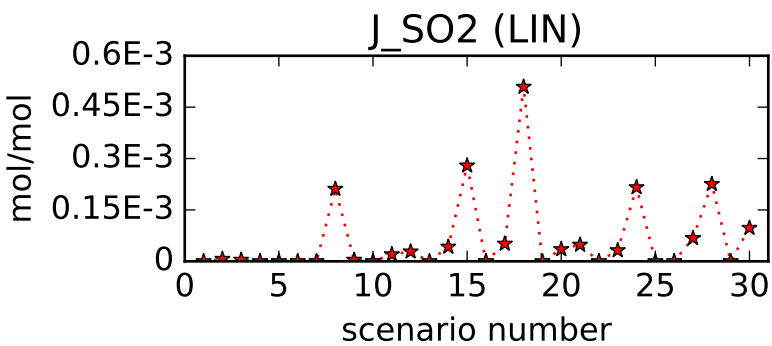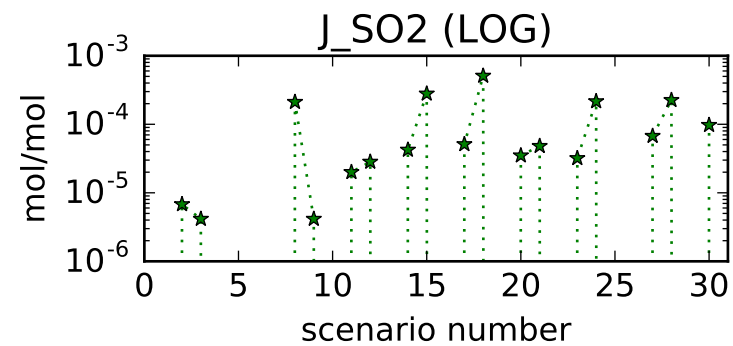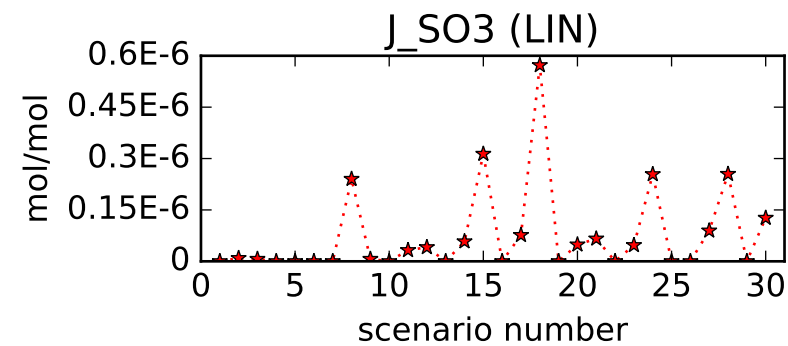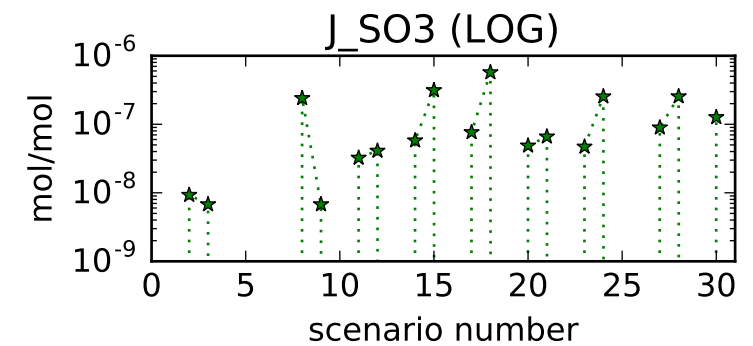

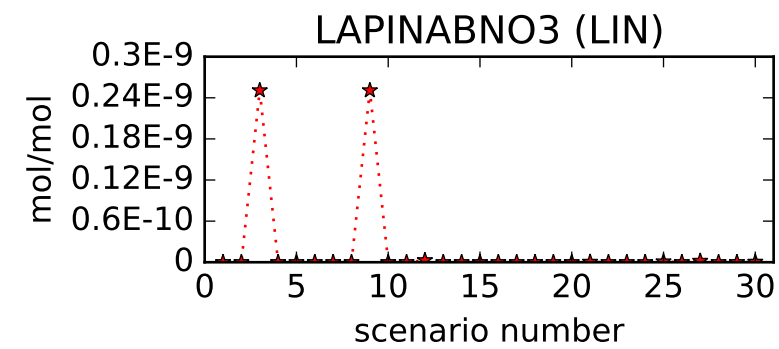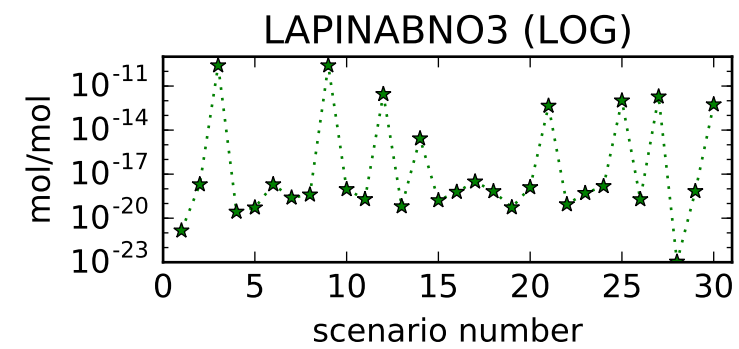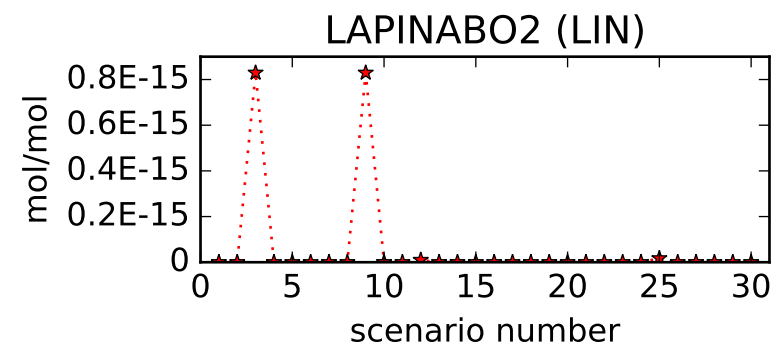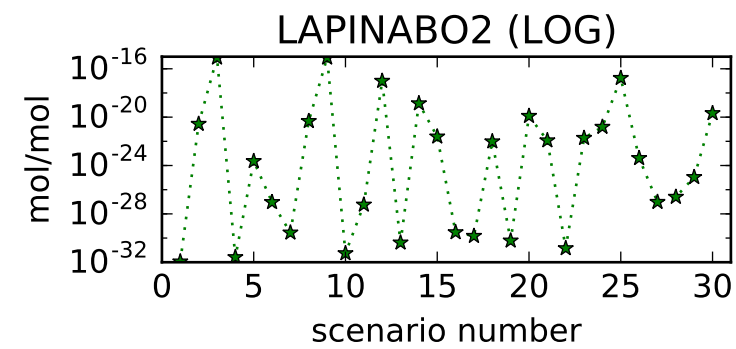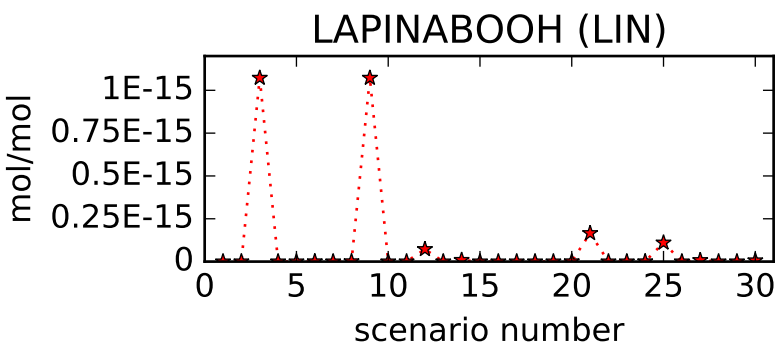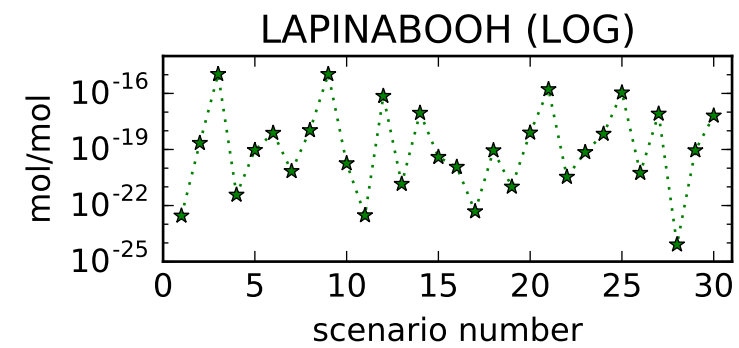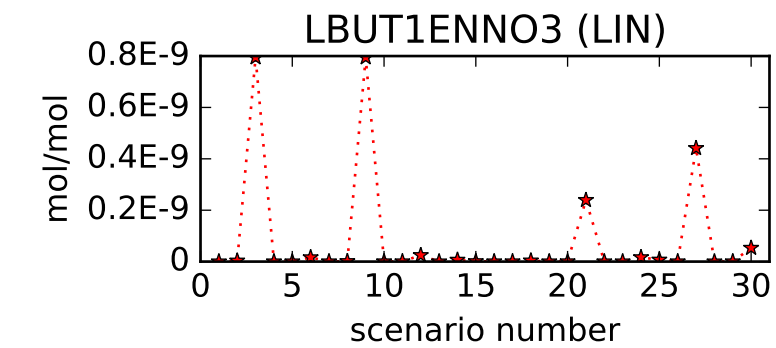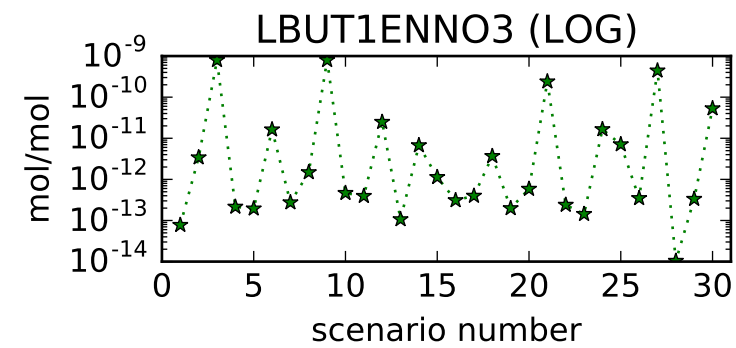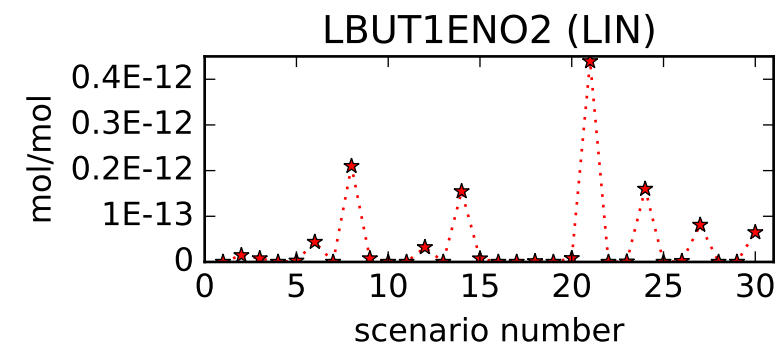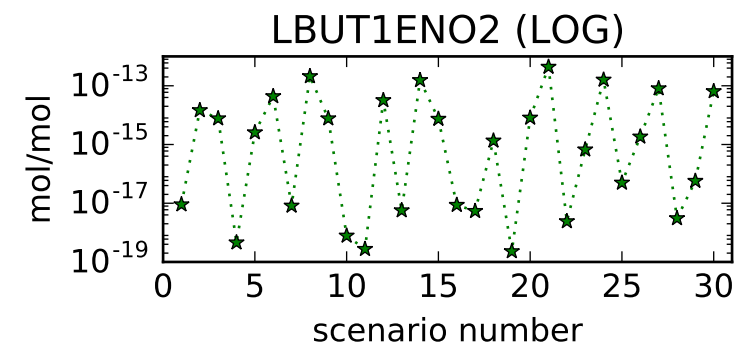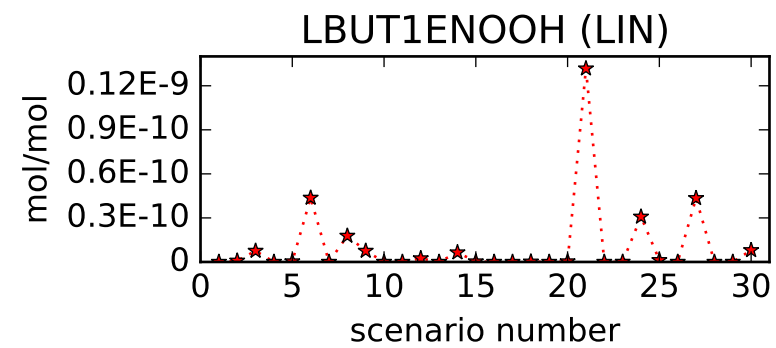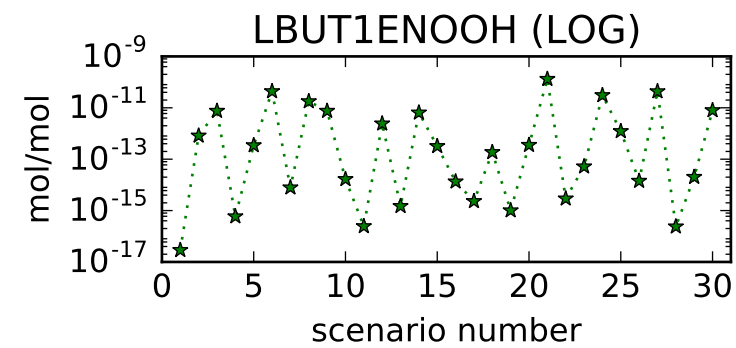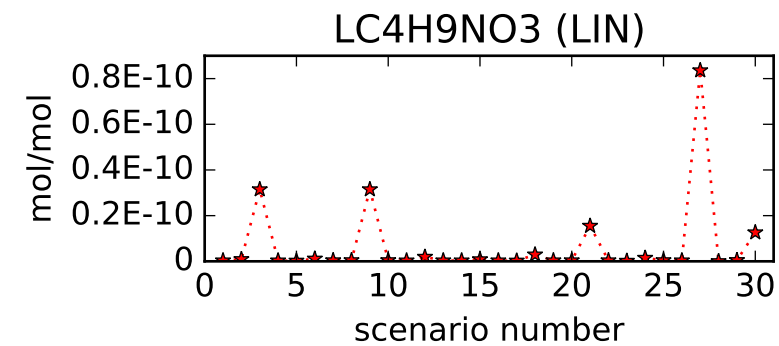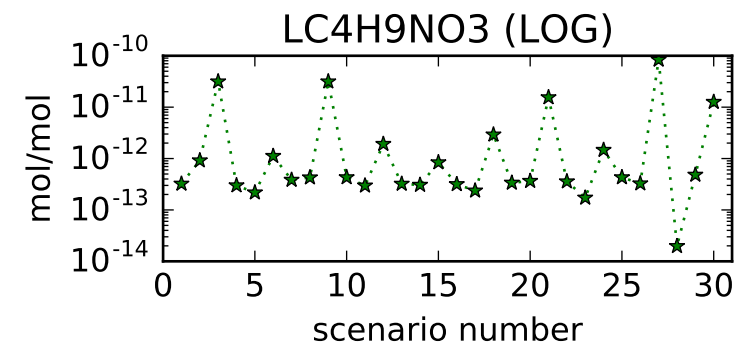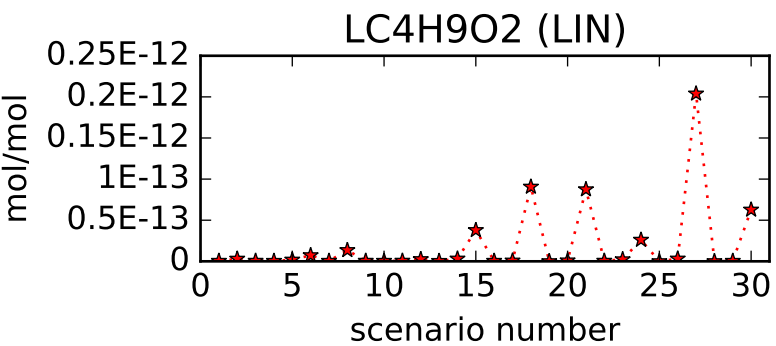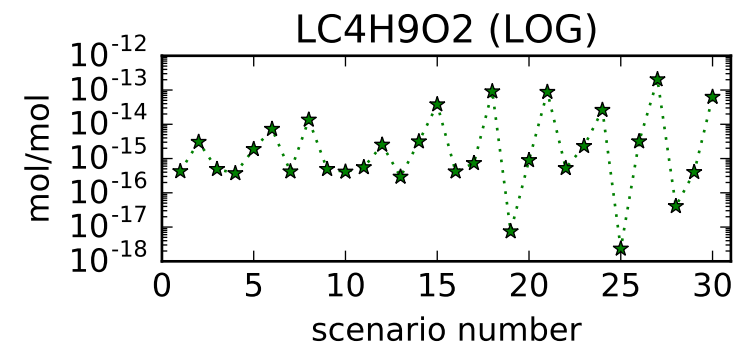



LC4H9OOH (LIN)

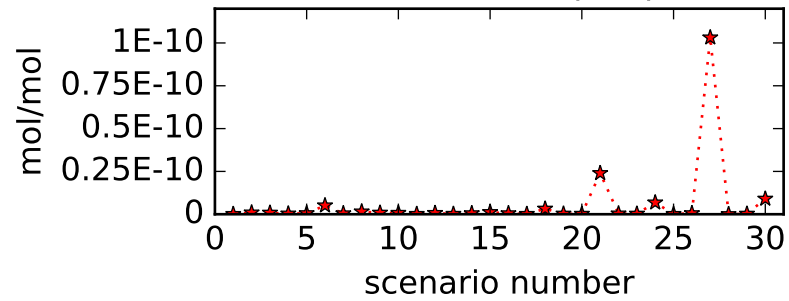

LC4H9OOH (LOG)

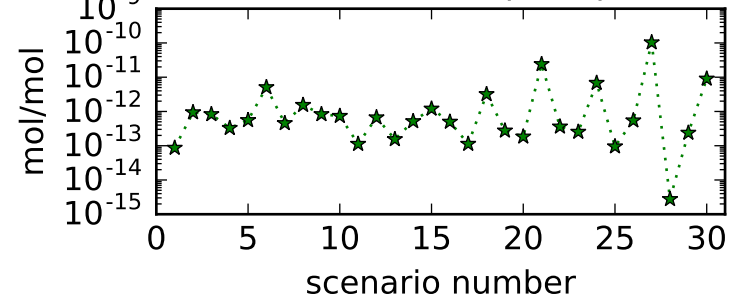

LC578O2 (LIN)

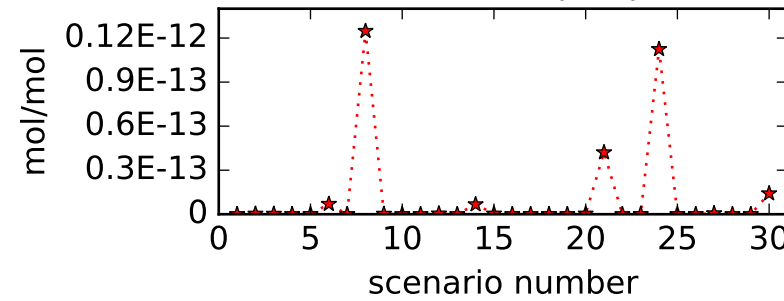

LC578O2 (LOG)

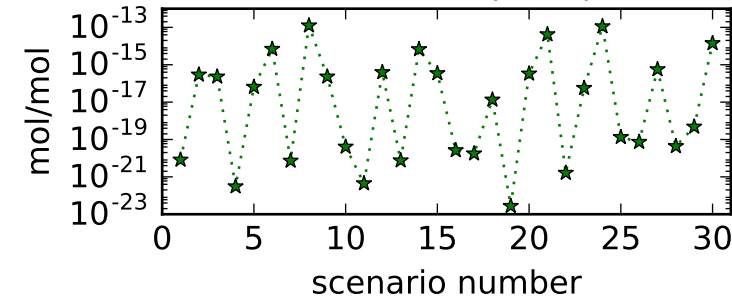

LC578OOH (LIN)

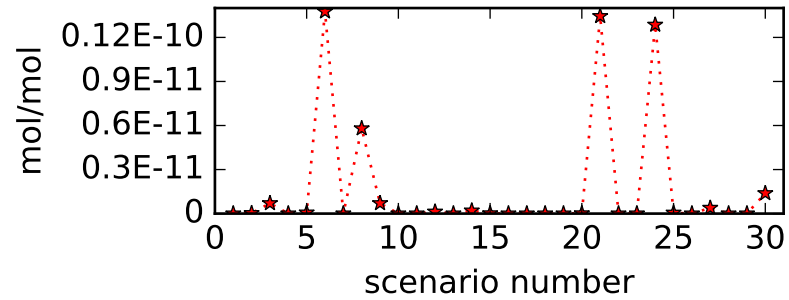

LC578OOH (LOG)

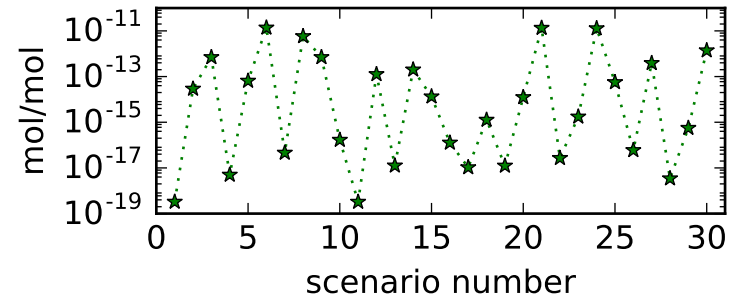

LC5PAN1719 (LIN)

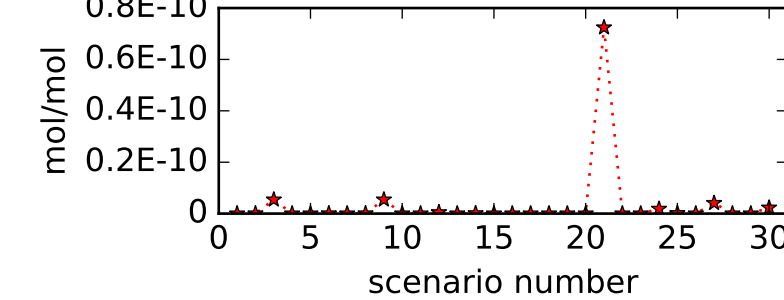

LC5PAN1719 (LOG)

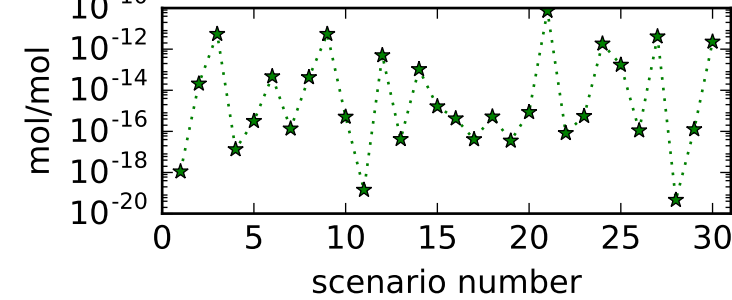

LCARBON (LIN)

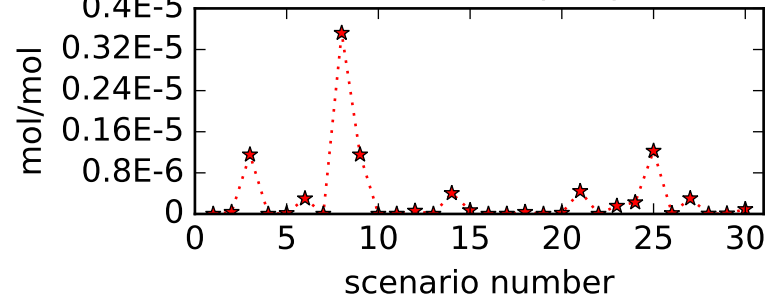

LCARBON (LOG)

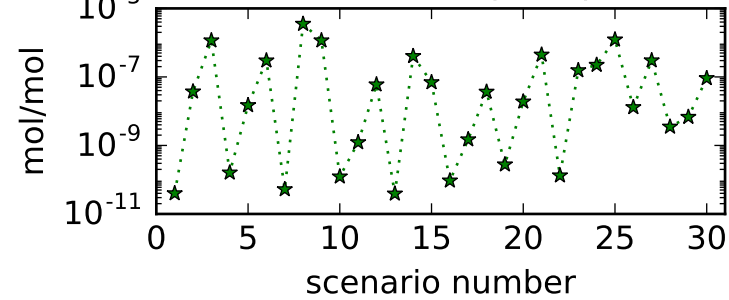

LDISOPACO (LIN)

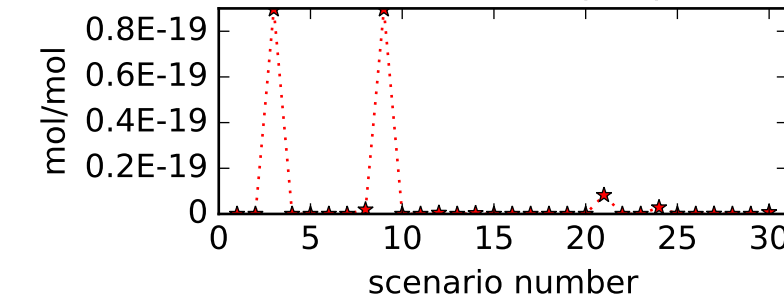

LDISOPACO (LOG)

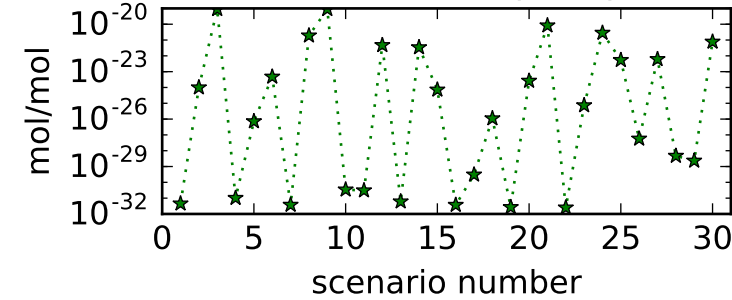

LDISOPACO2 (LIN)

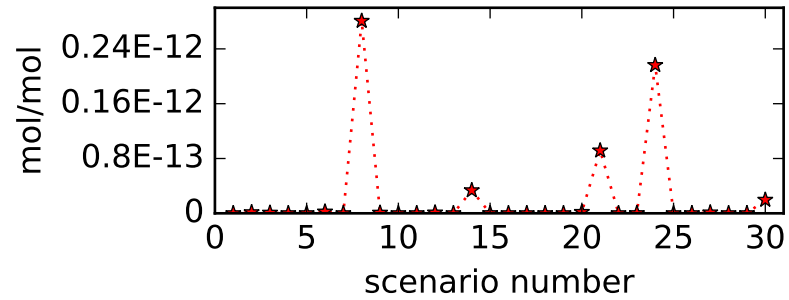

LDISOPACO2 (LOG)

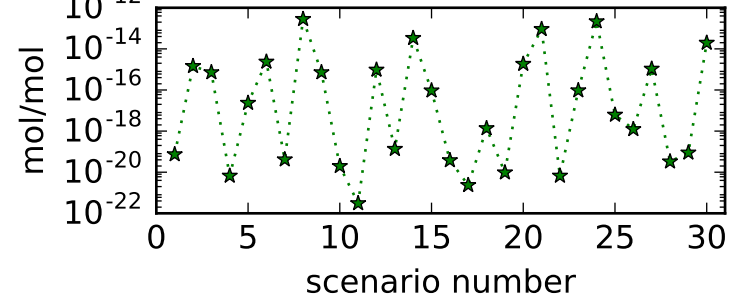

LHAROM (LIN)

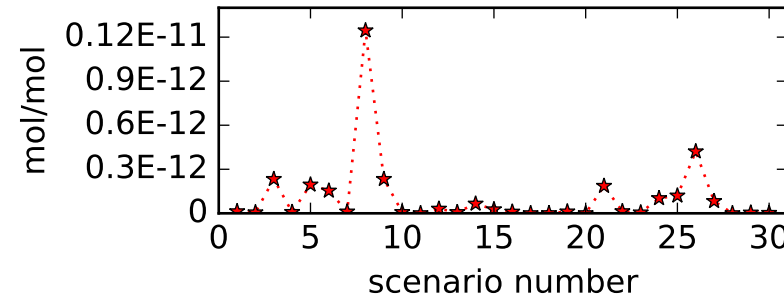

LHAROM (LOG)

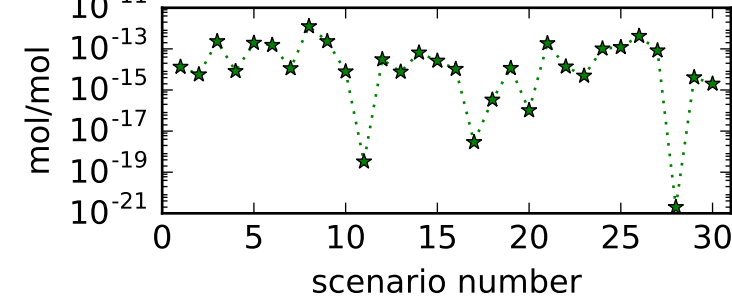

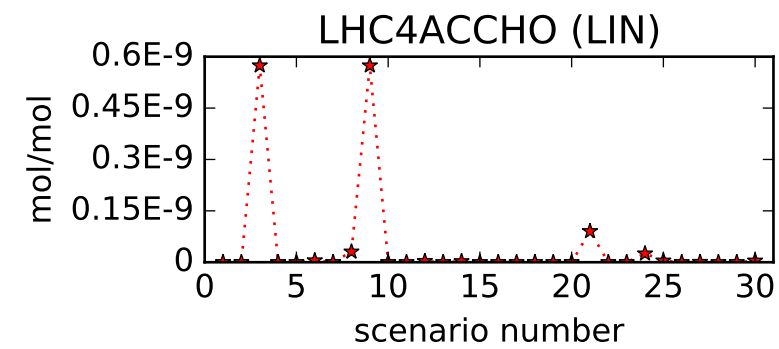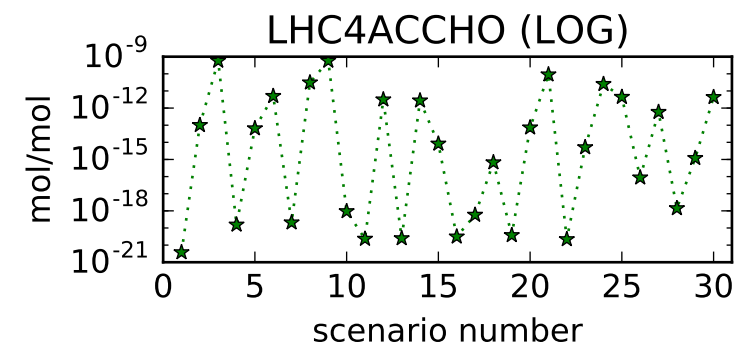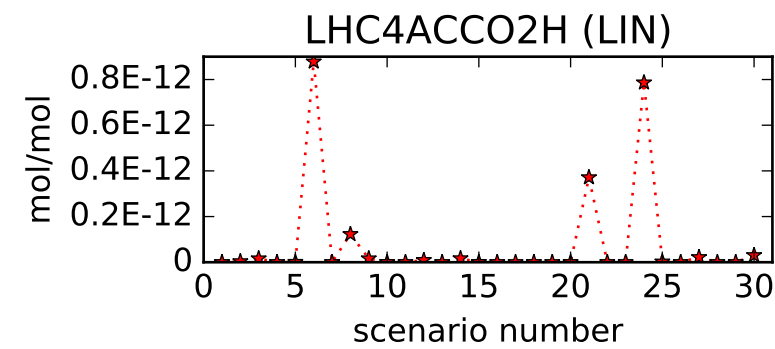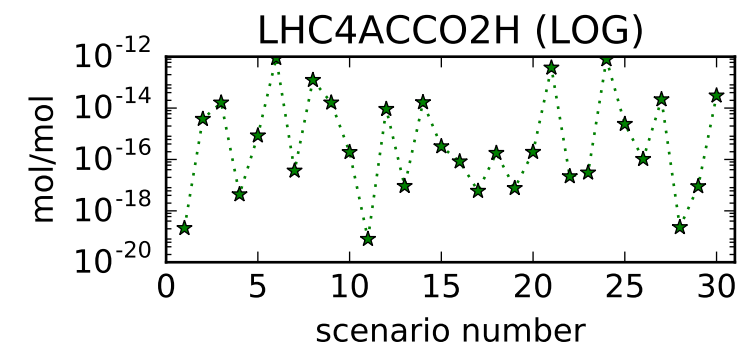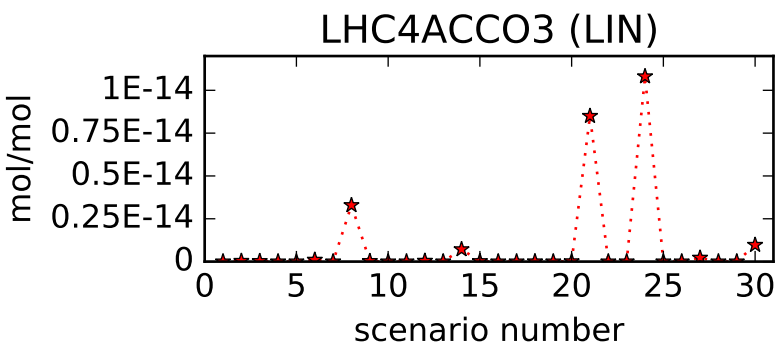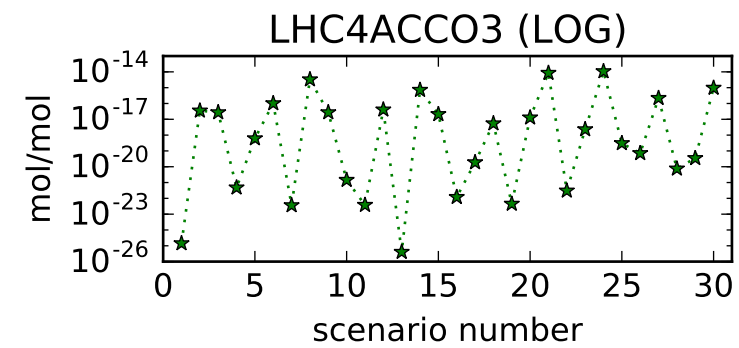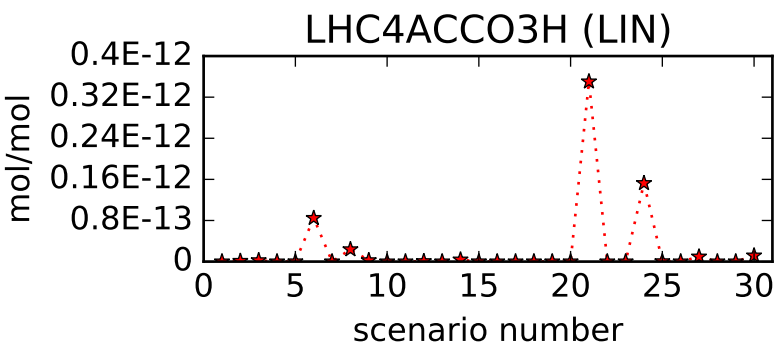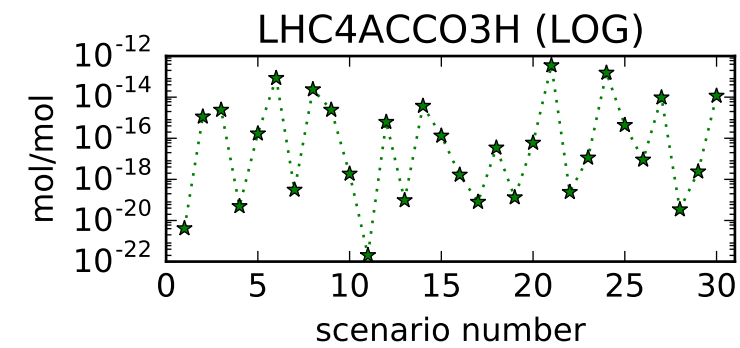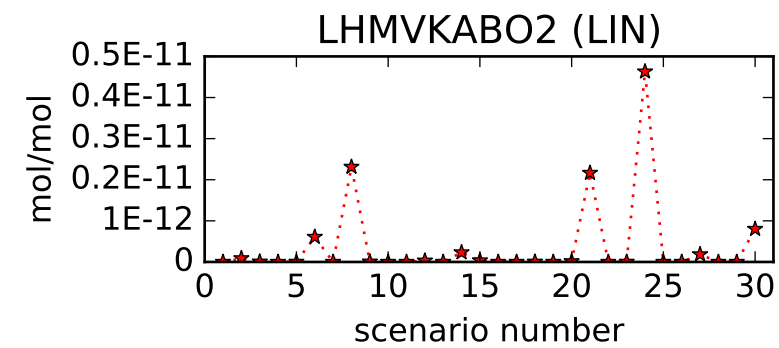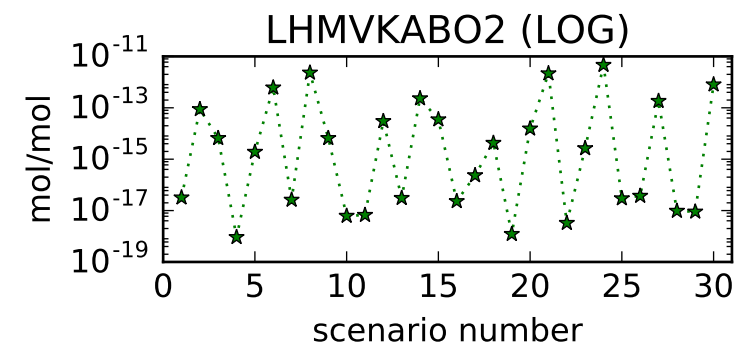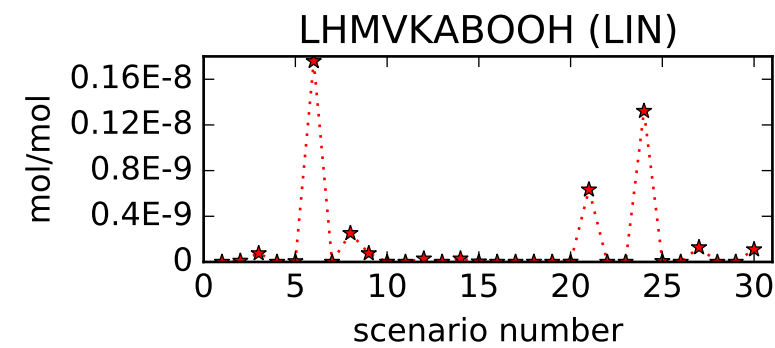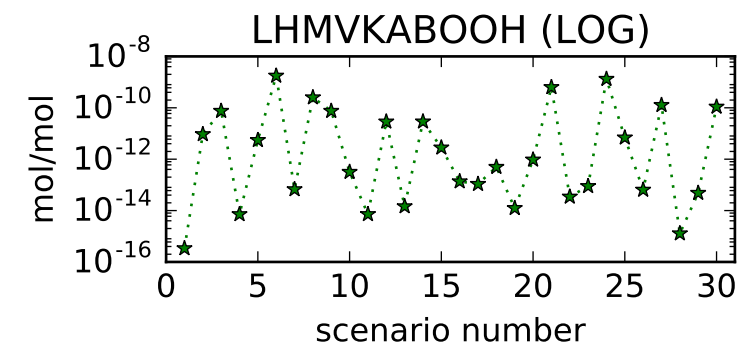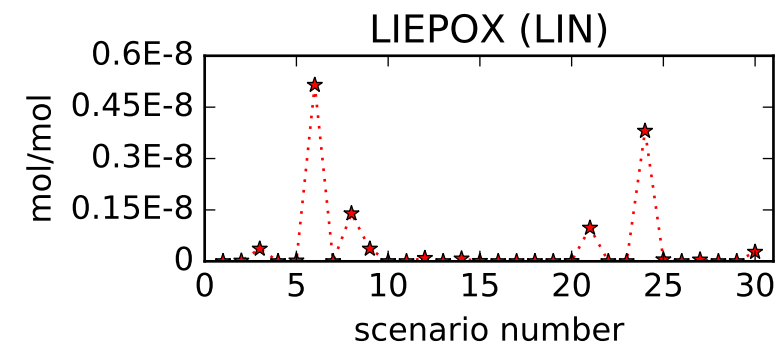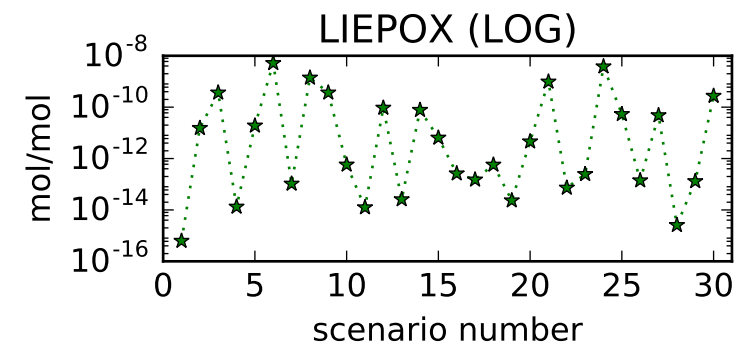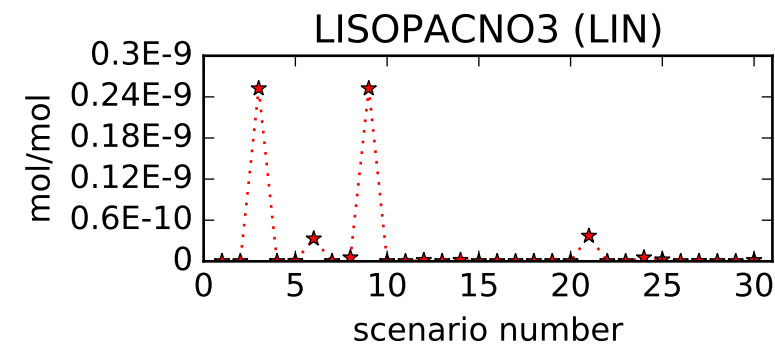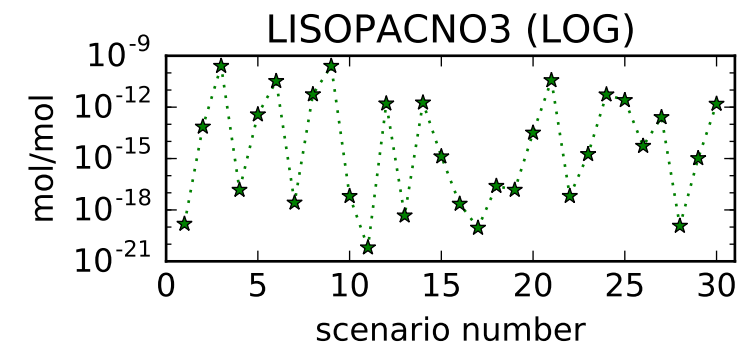

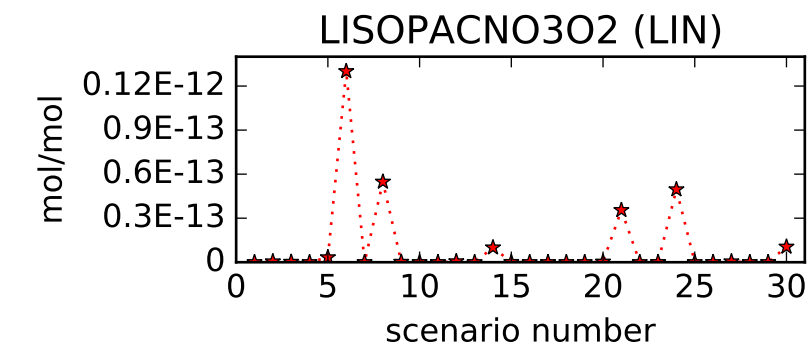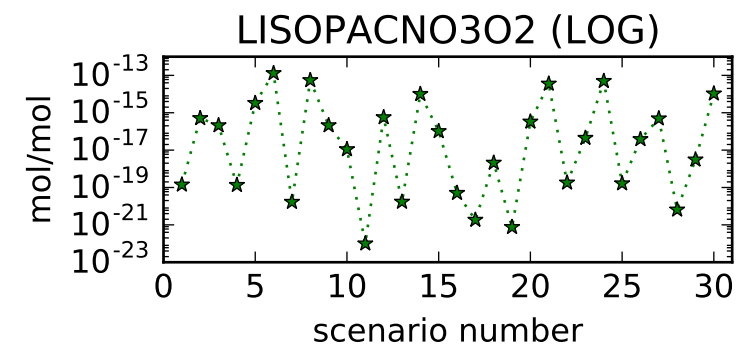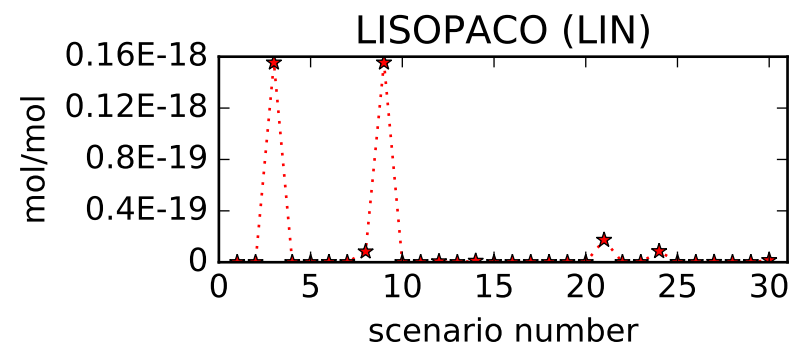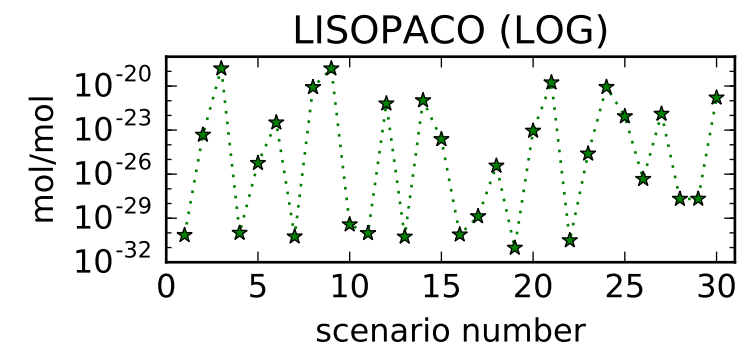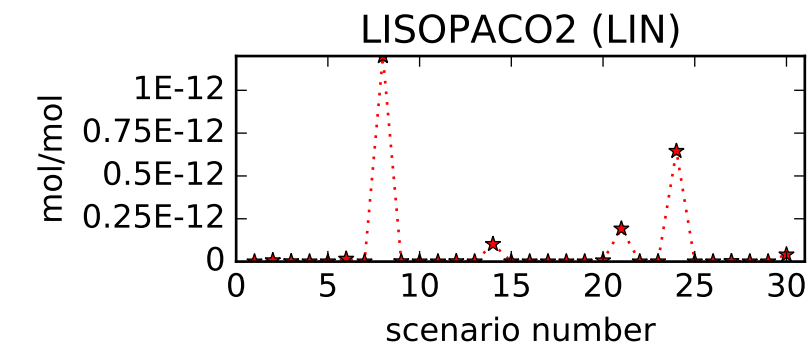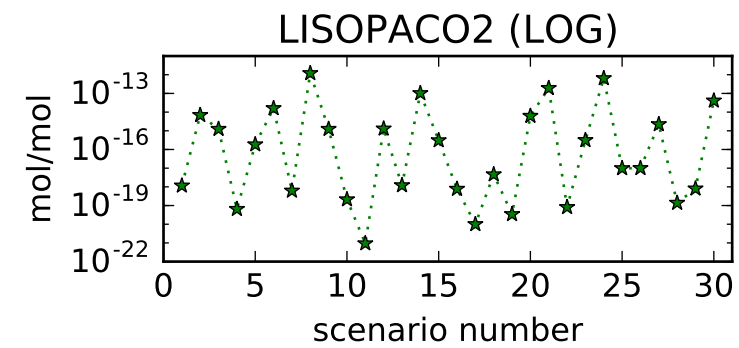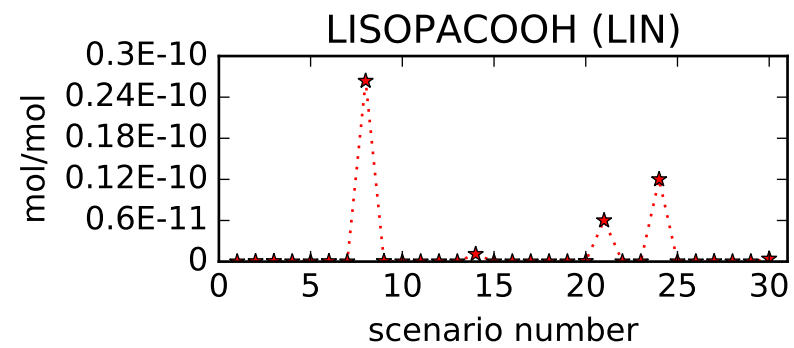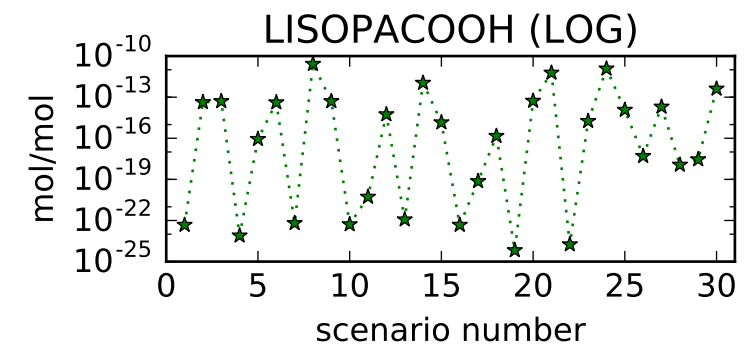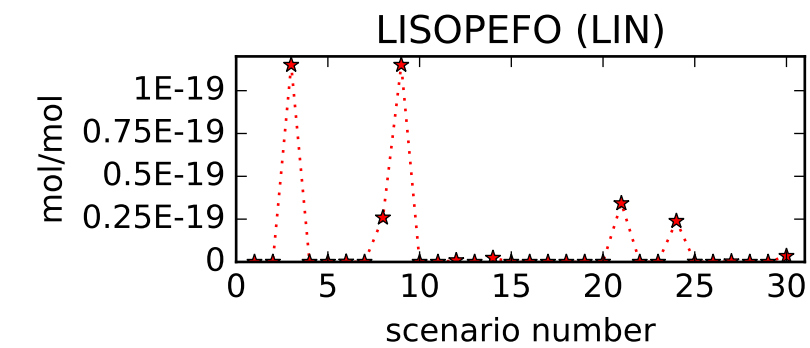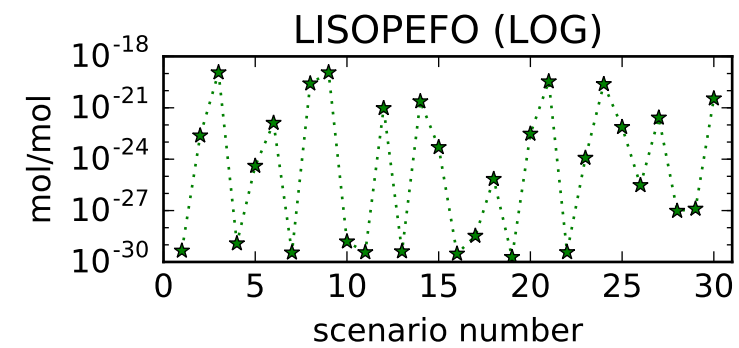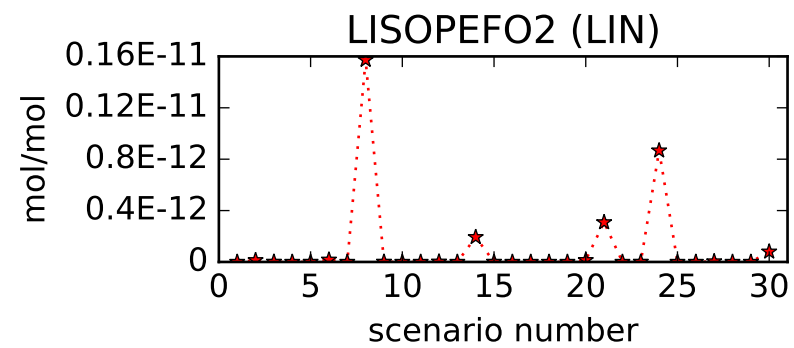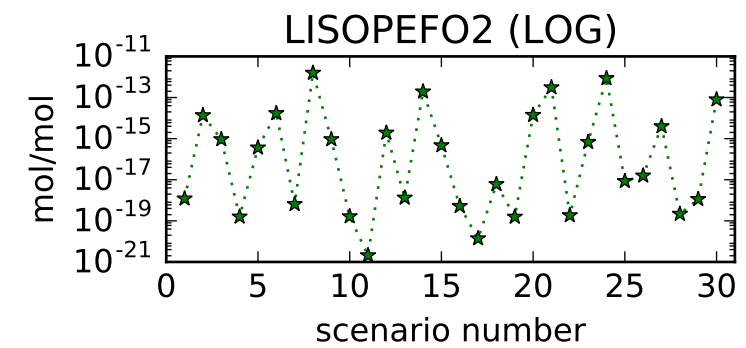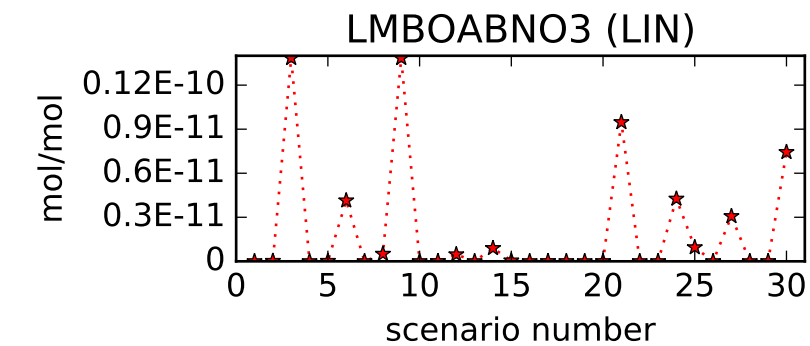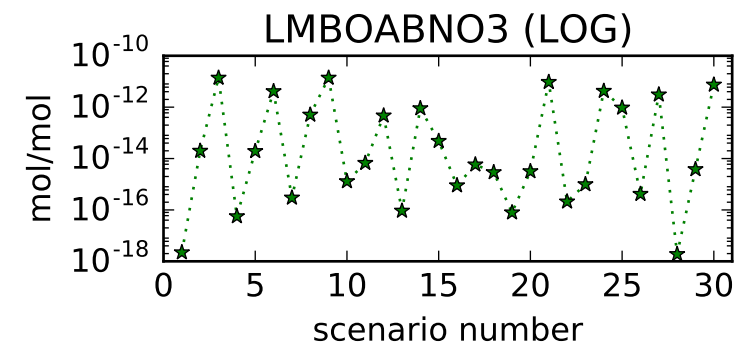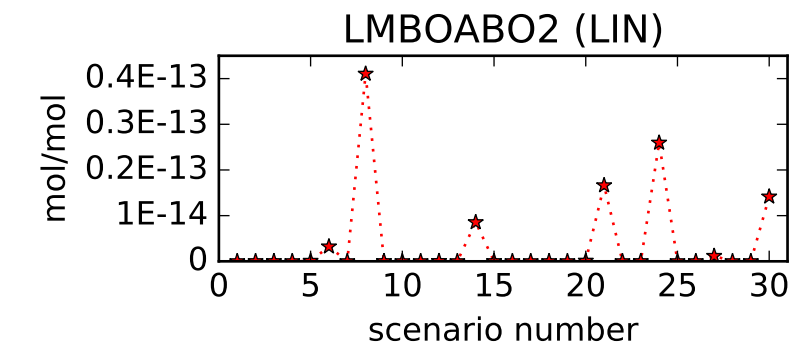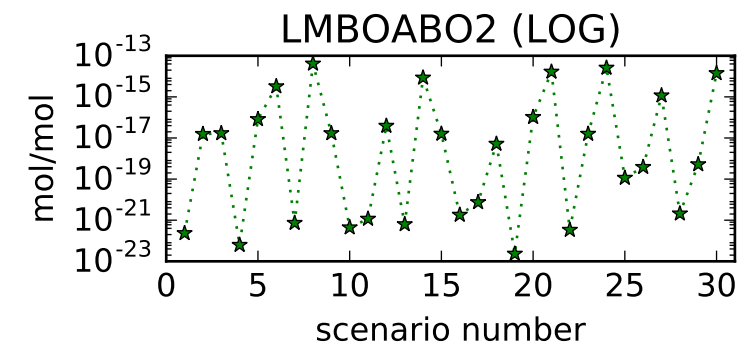

LMBOABOOH (LIN)

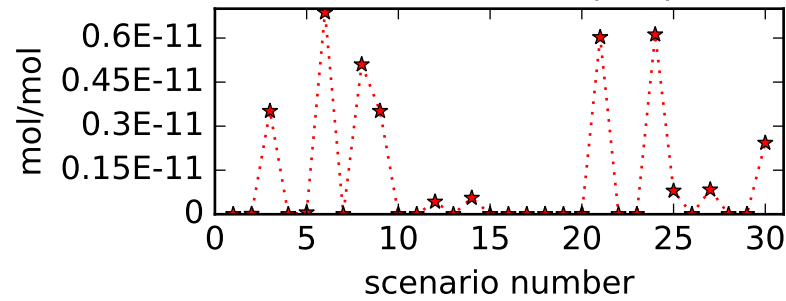

LMBOABOOH (LOG)

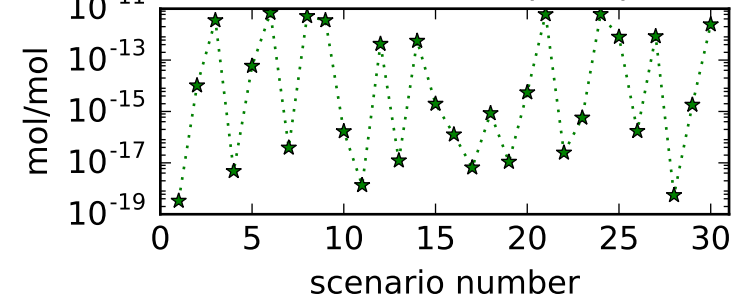

LME3FURANO2 (LIN)

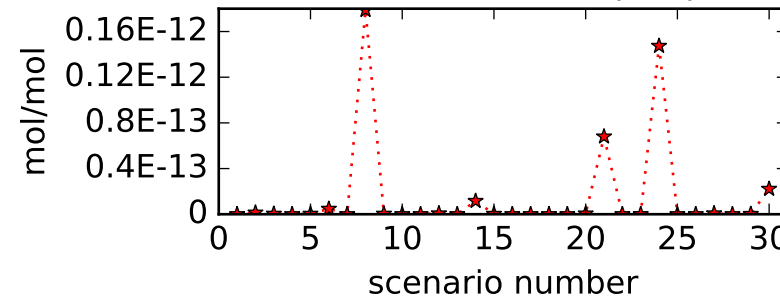

LME3FURANO2 (LOG)

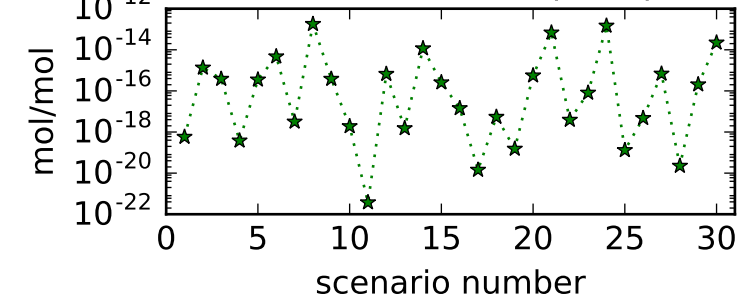

LMEKNO3 (LIN)

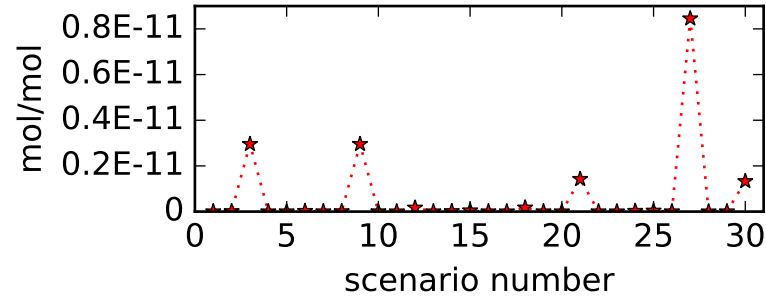

LMEKNO3 (LOG)

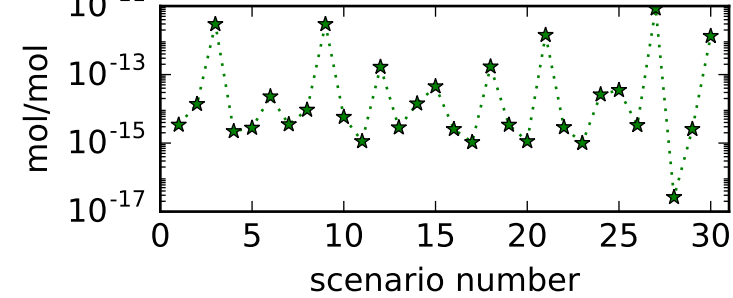

LMEKO2 (LIN)

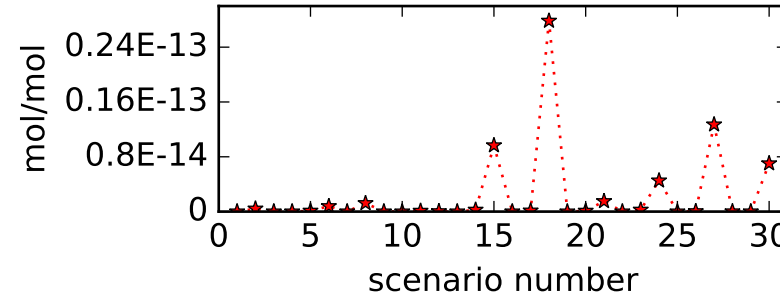

LMEKO2 (LOG)

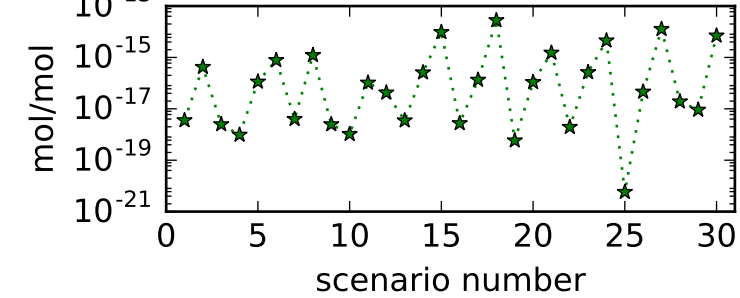

LMEKOOH (LIN)

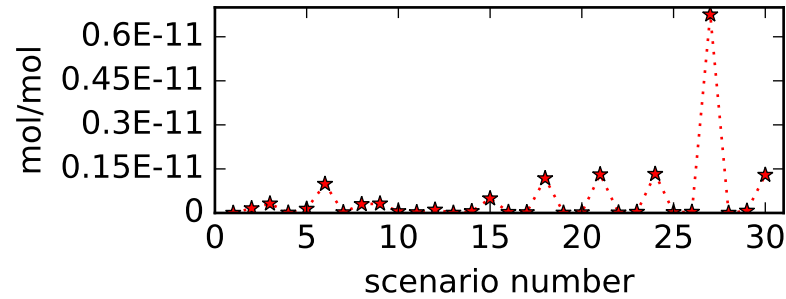

LMEKOOH (LOG)

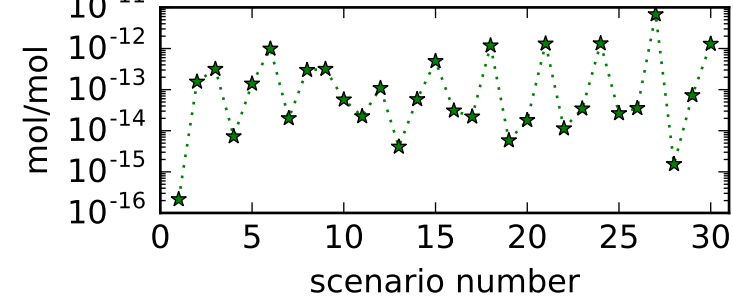

LNAPINABO2 (LIN)

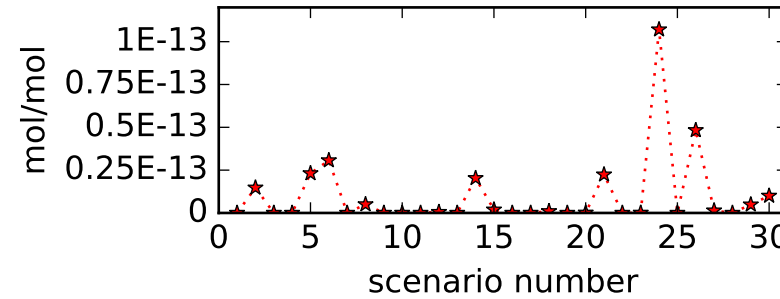

LNAPINABO2 (LOG)

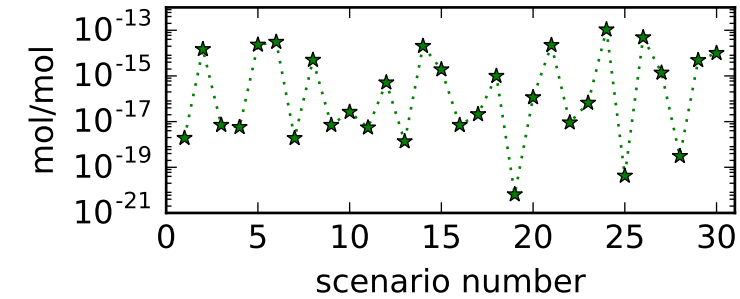

LNAPINABOOH (LIN)

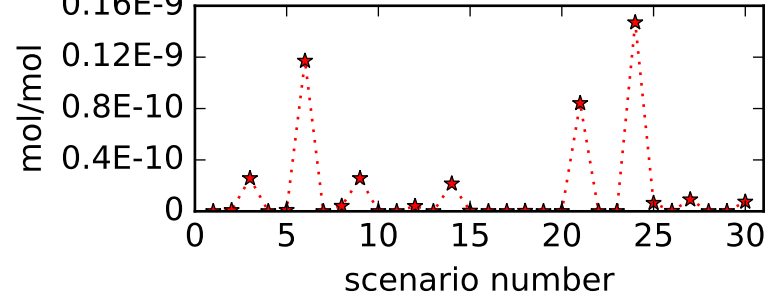

LNAPINABOOH (LOG)

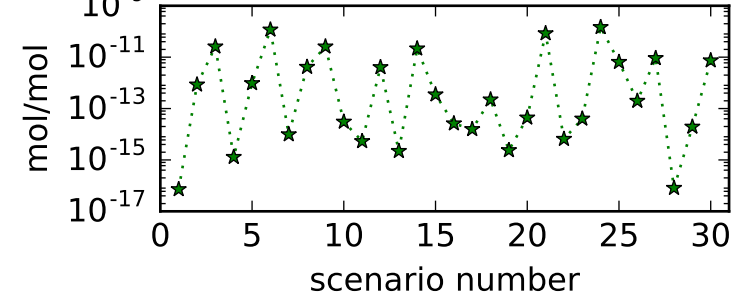

LNBPINABO2 (LIN)

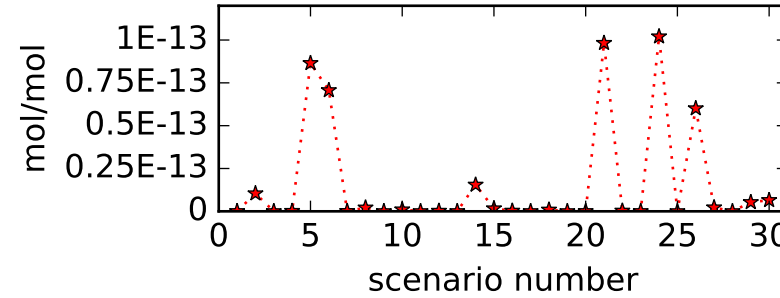

LNBPINABO2 (LOG)

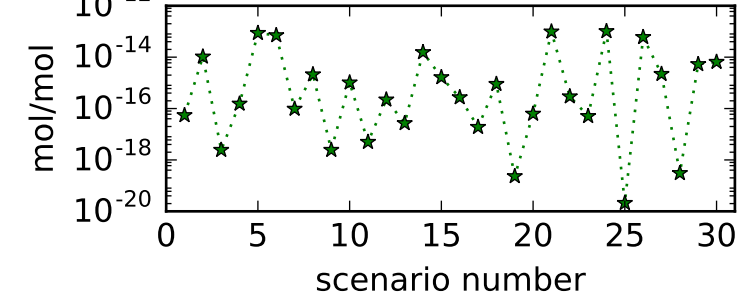

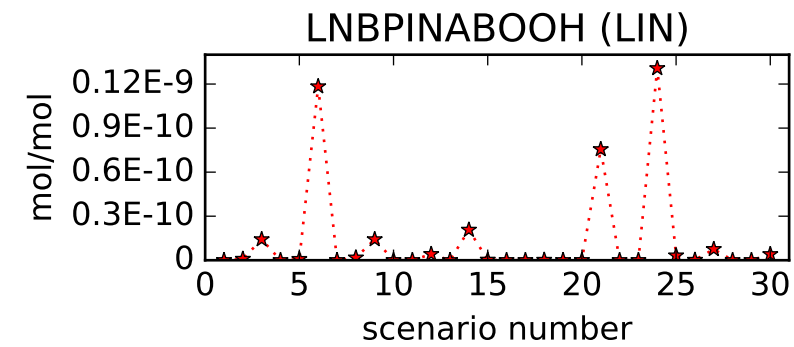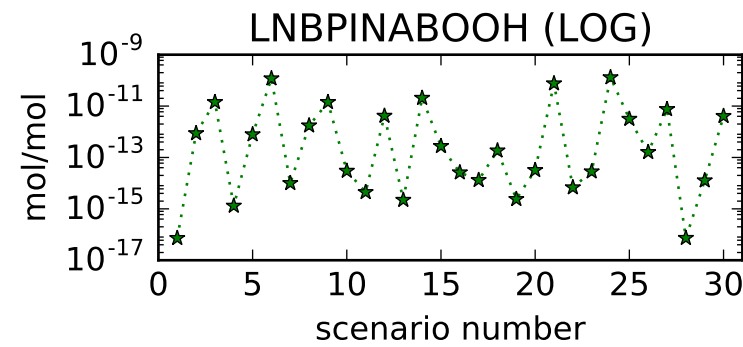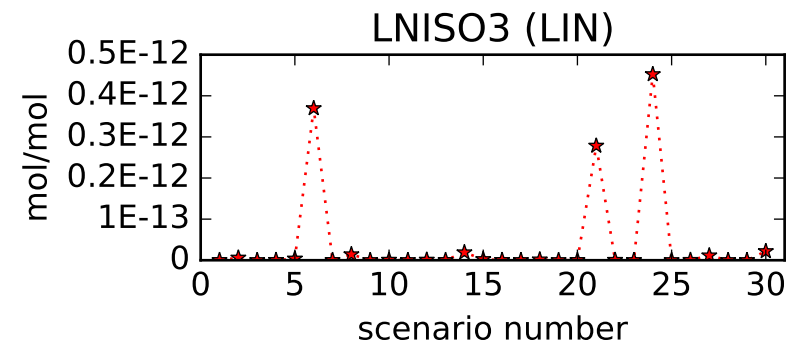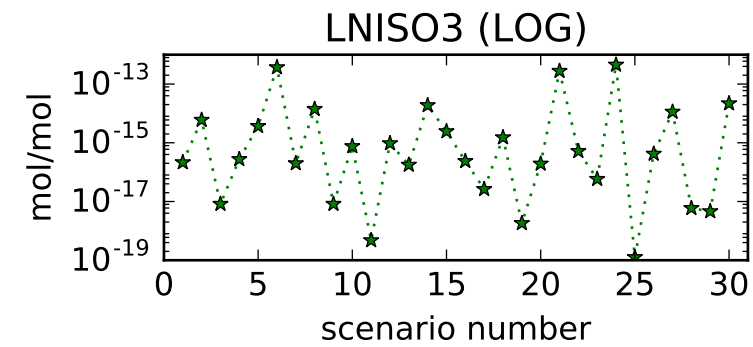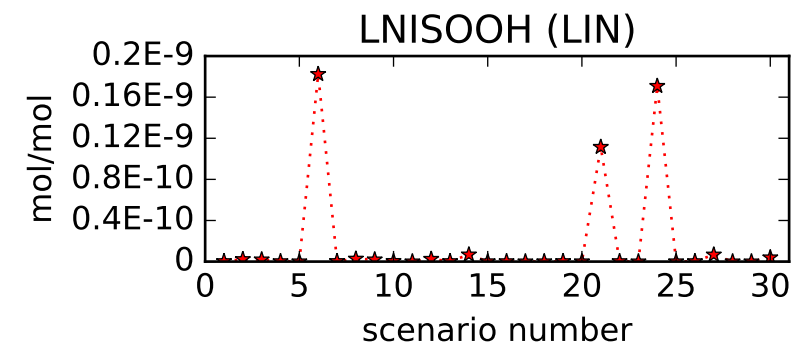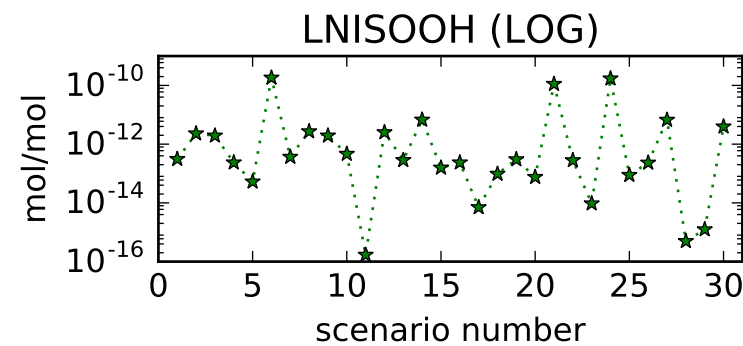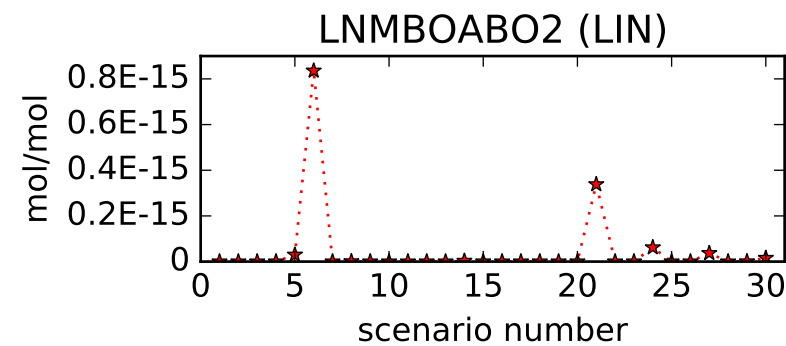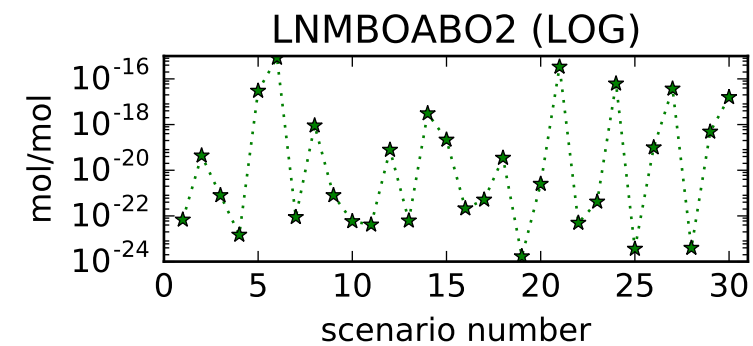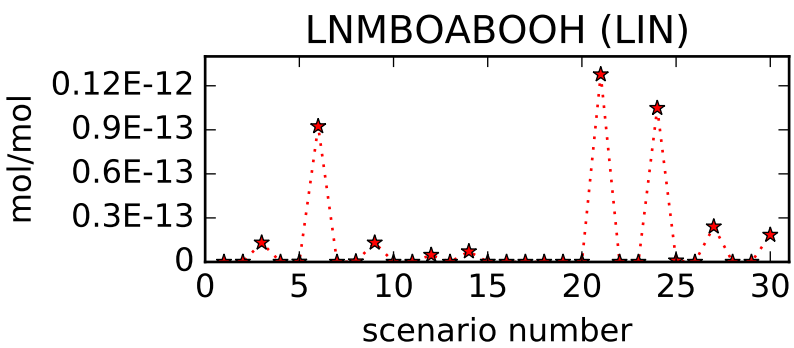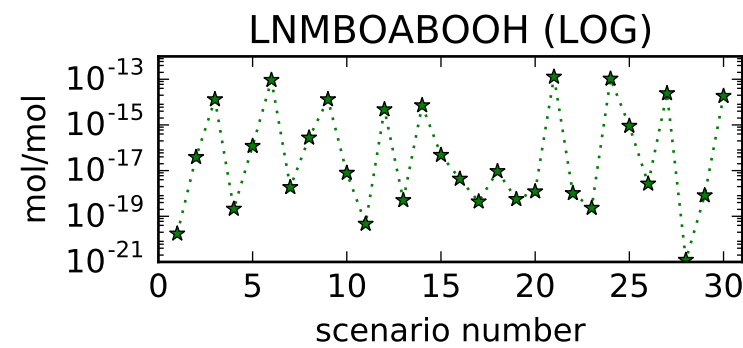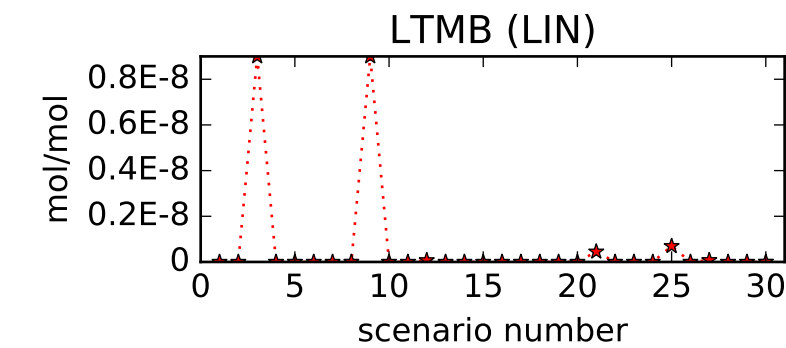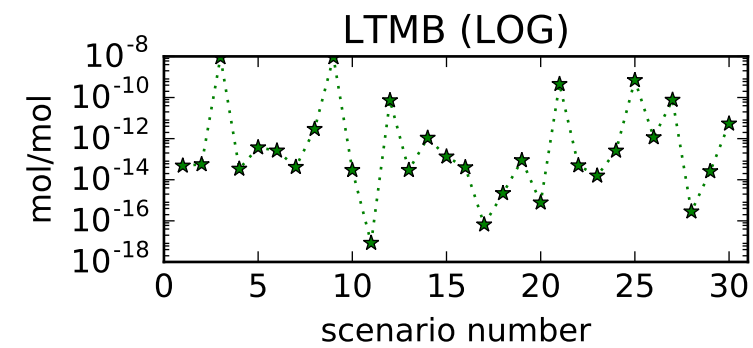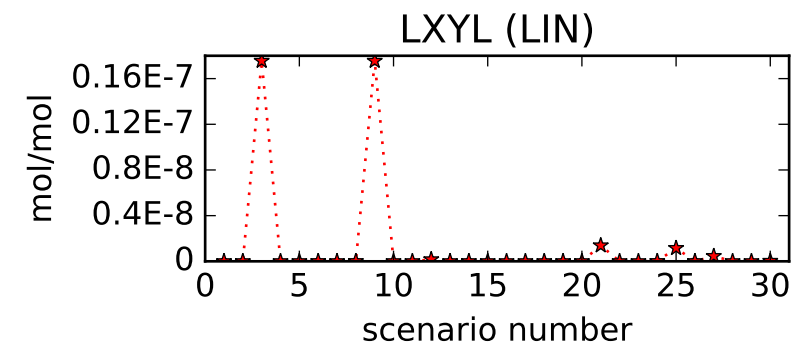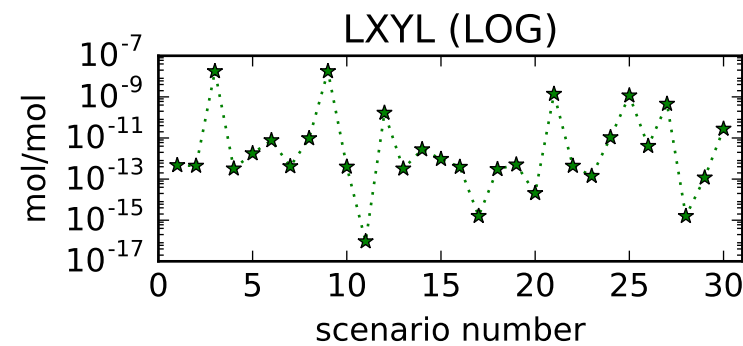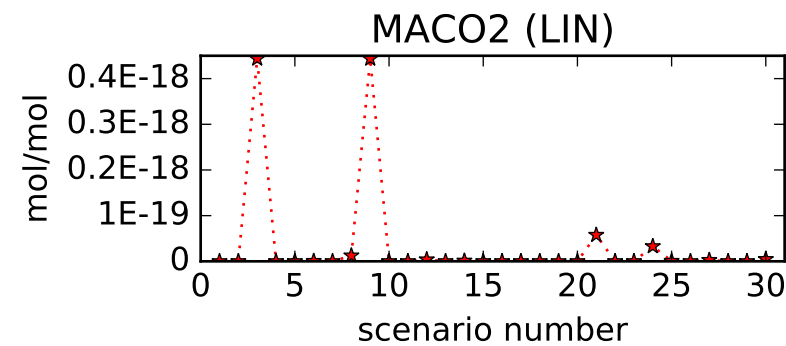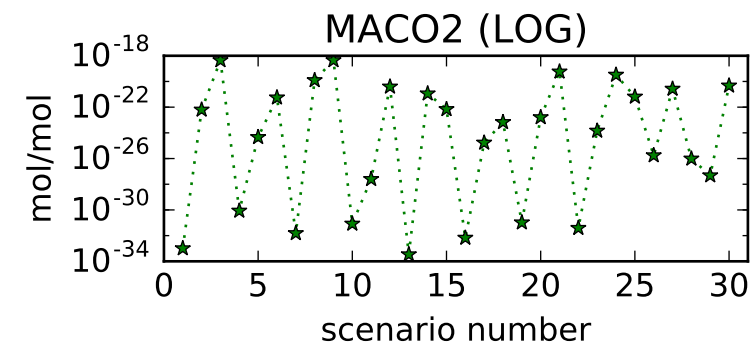



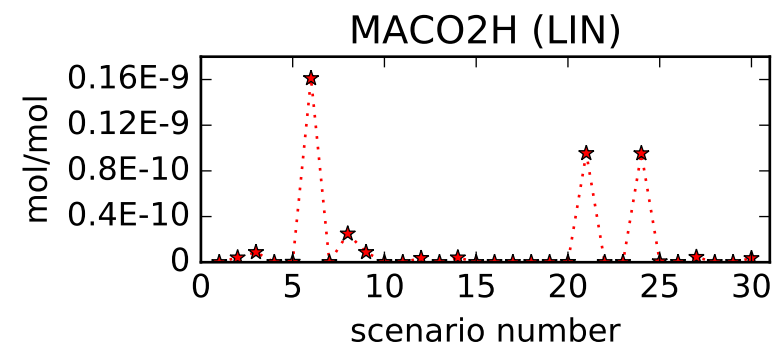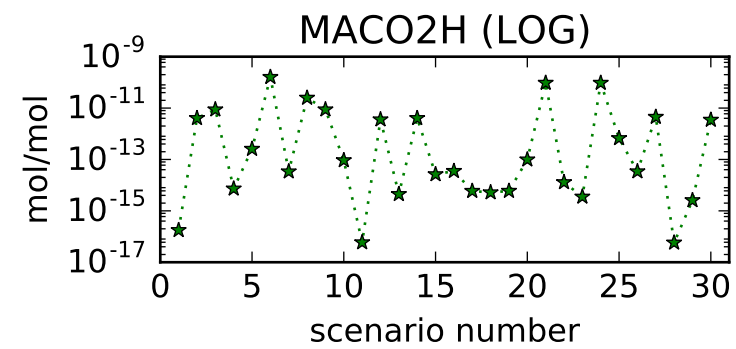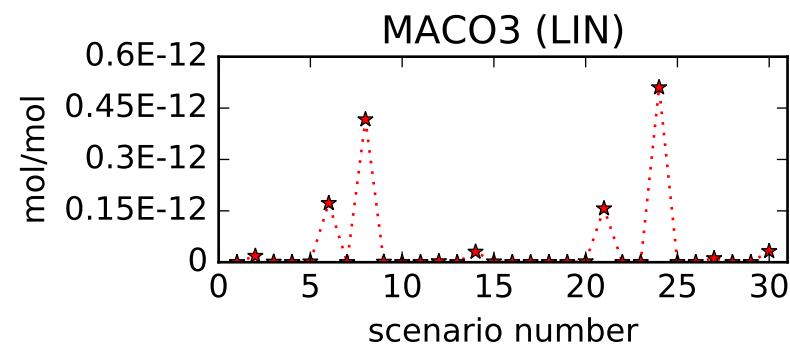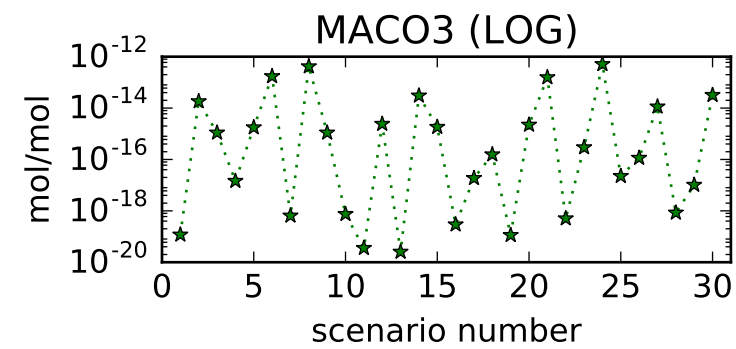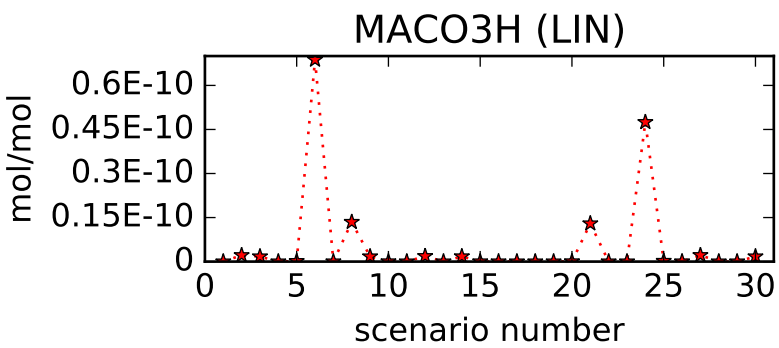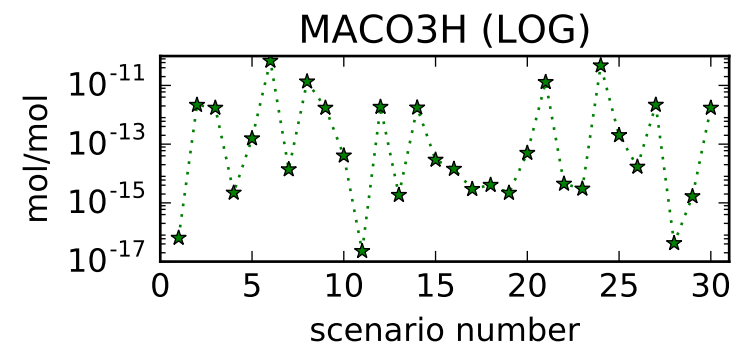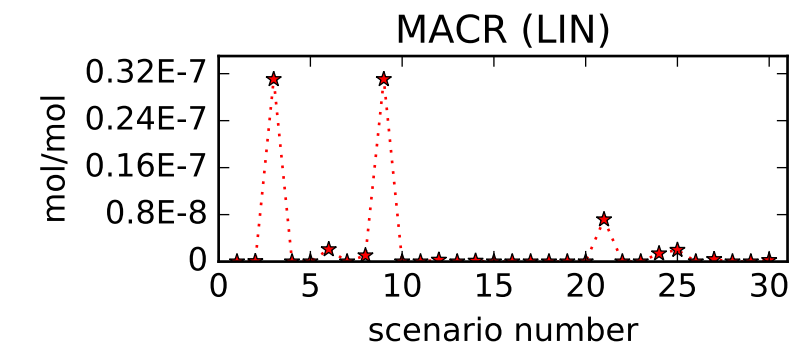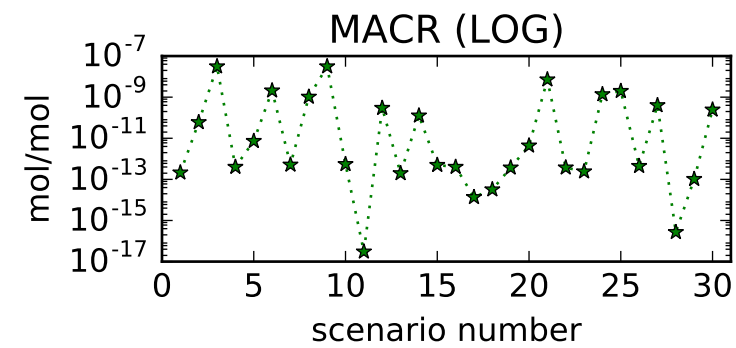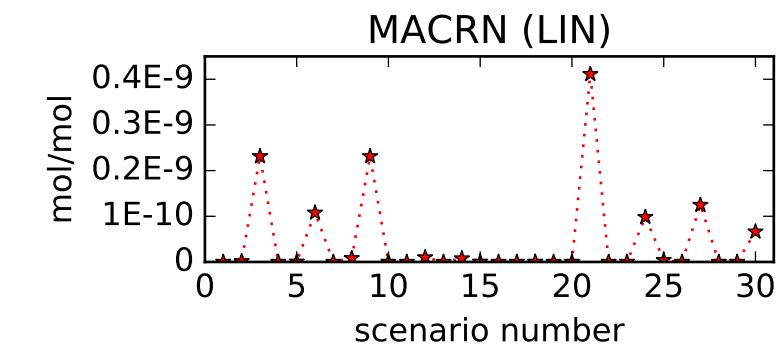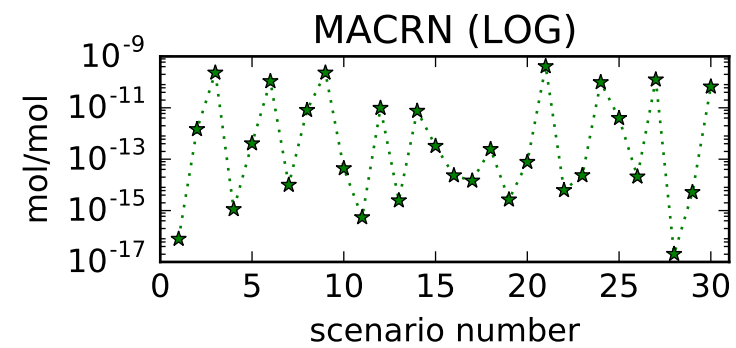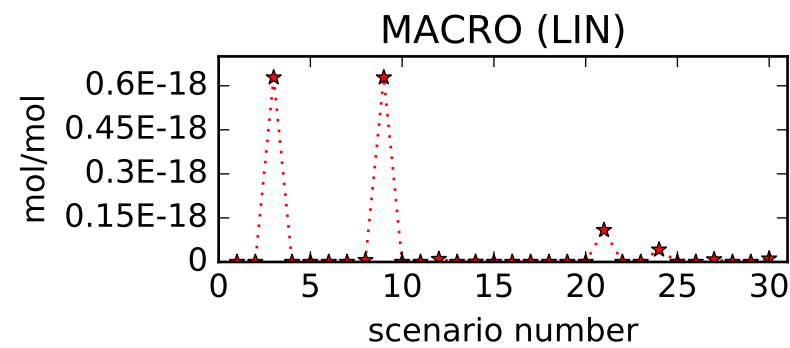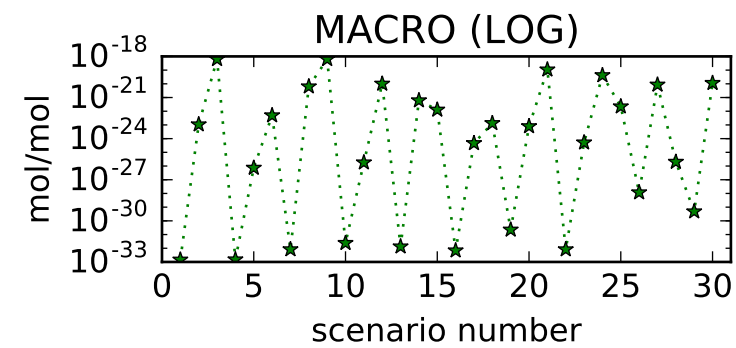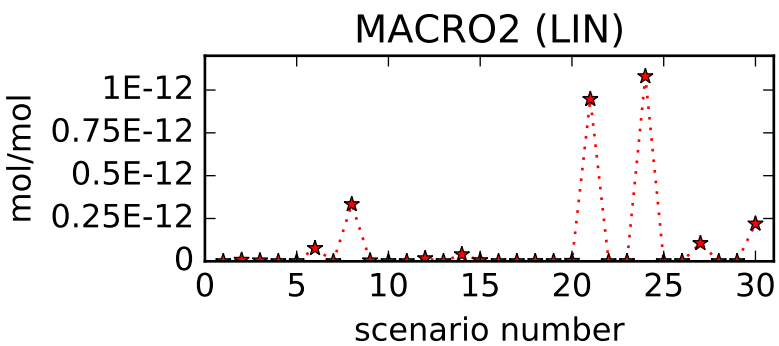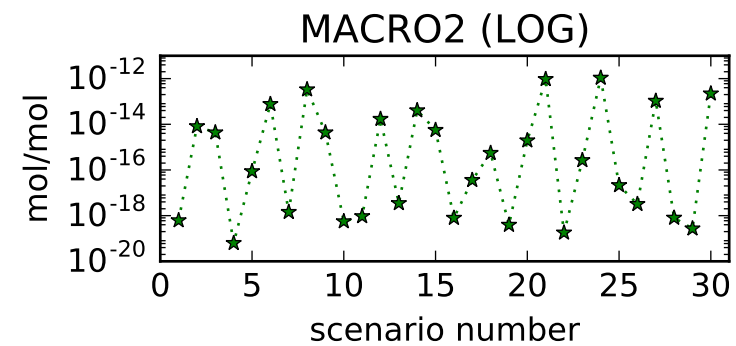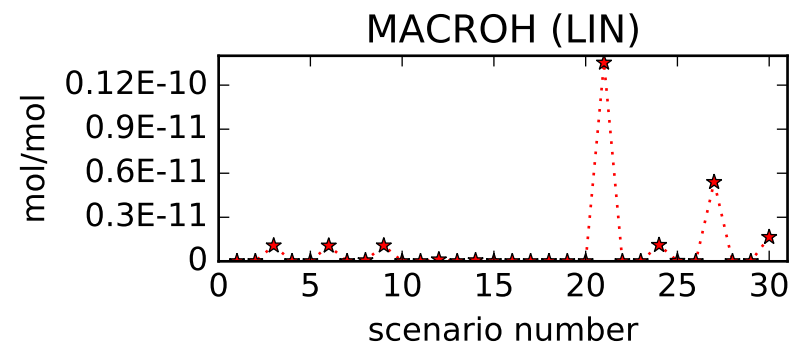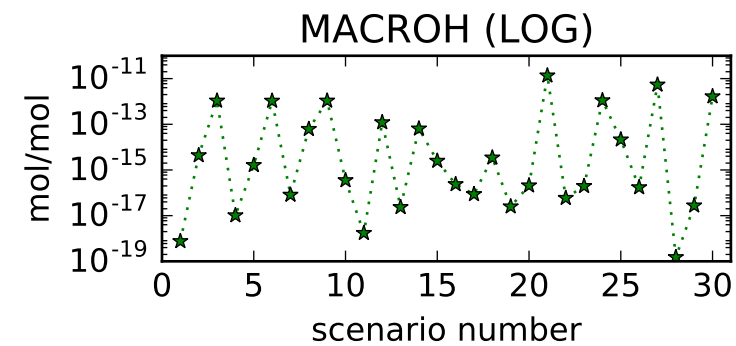

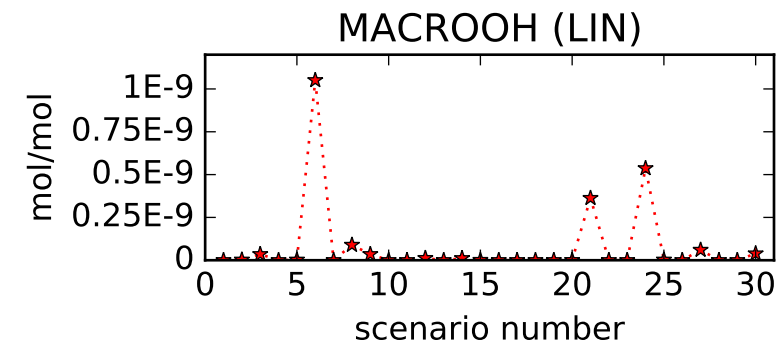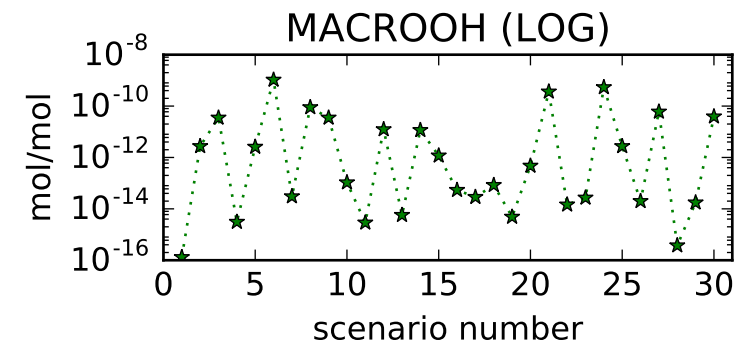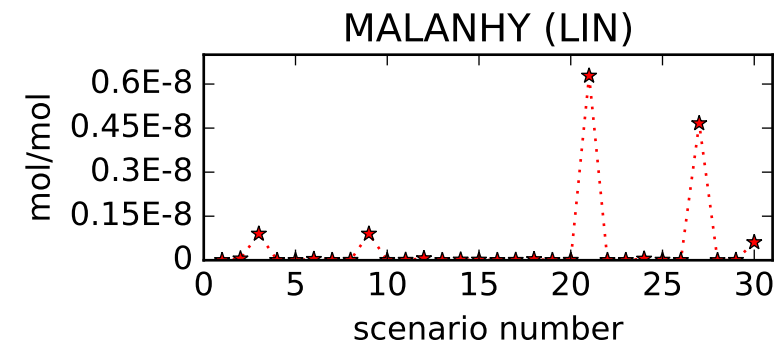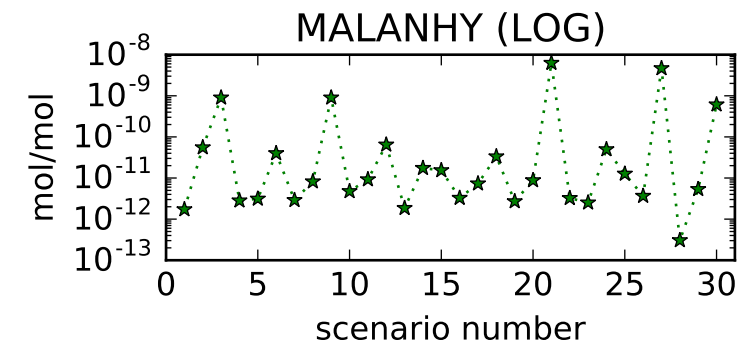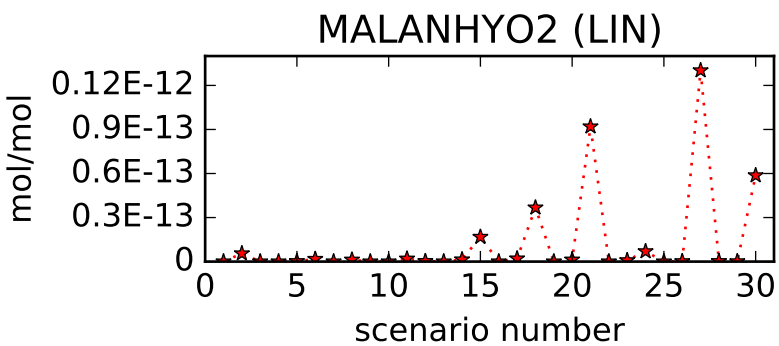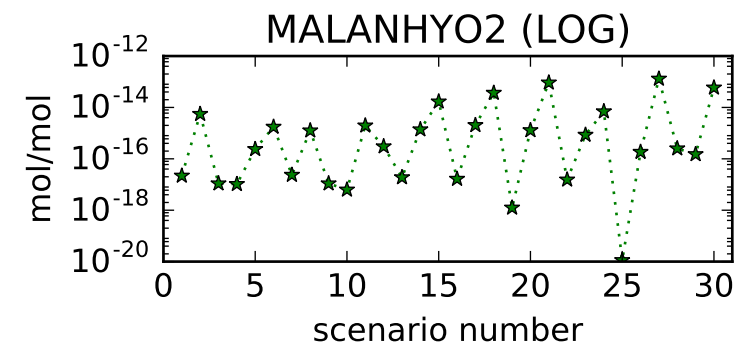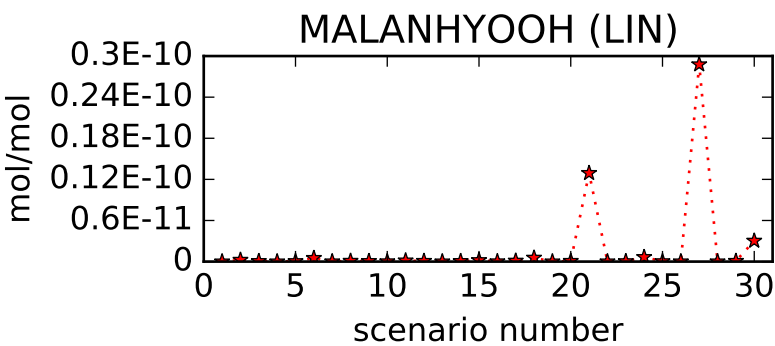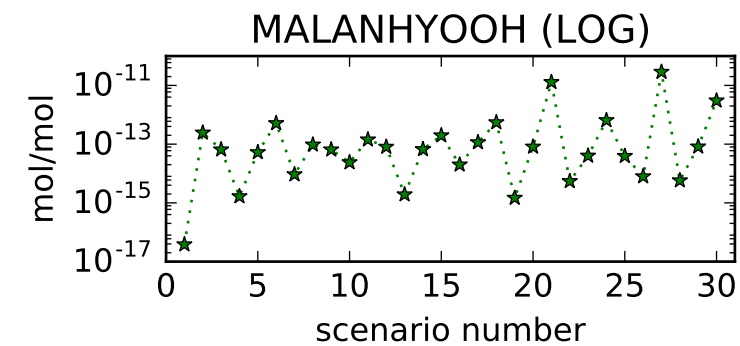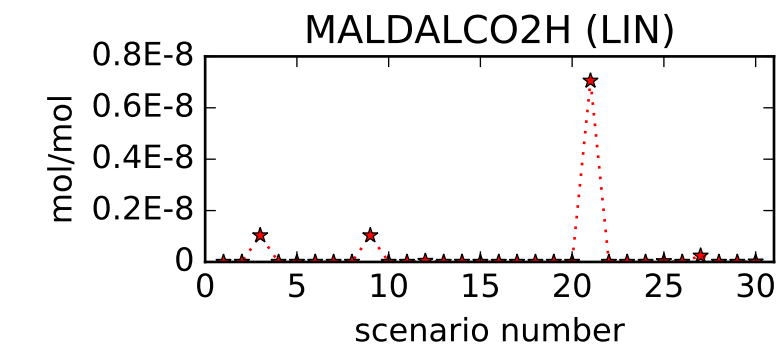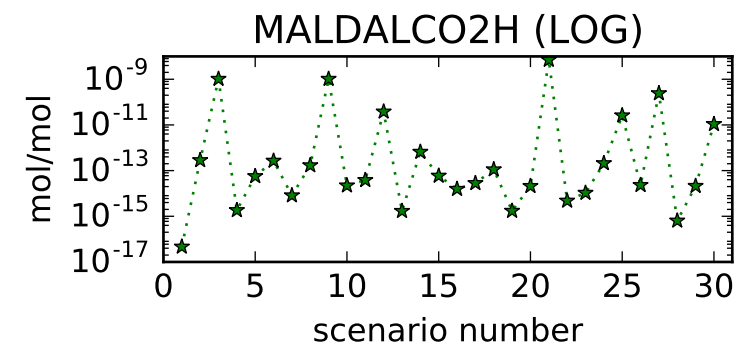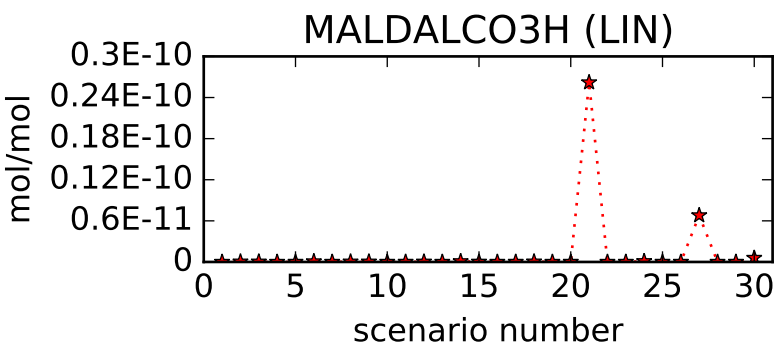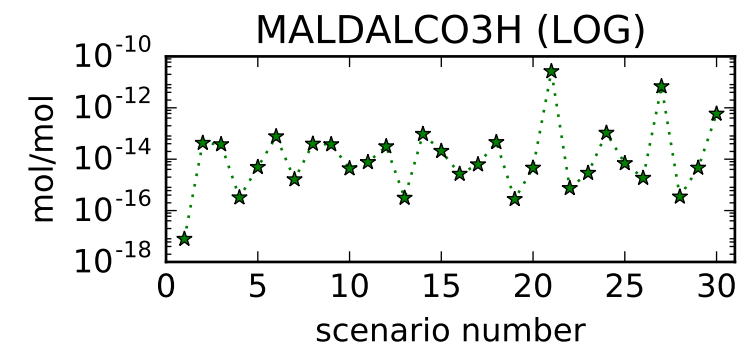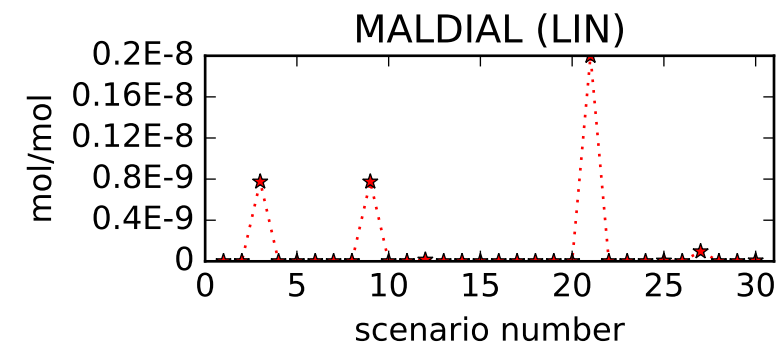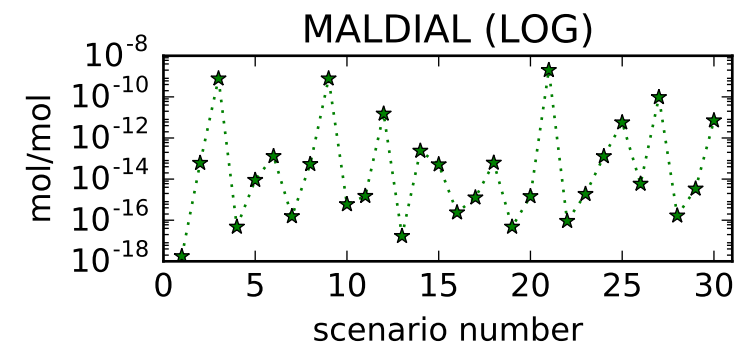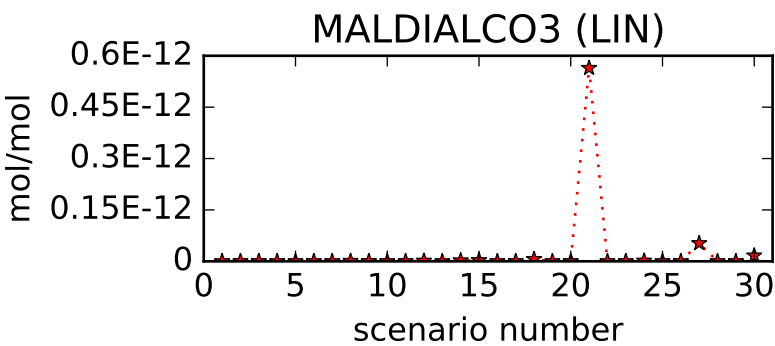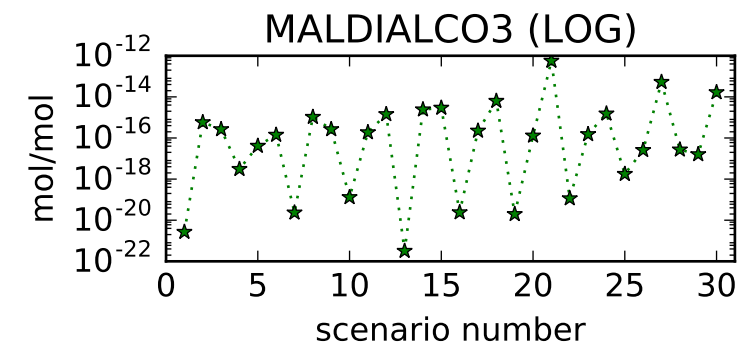

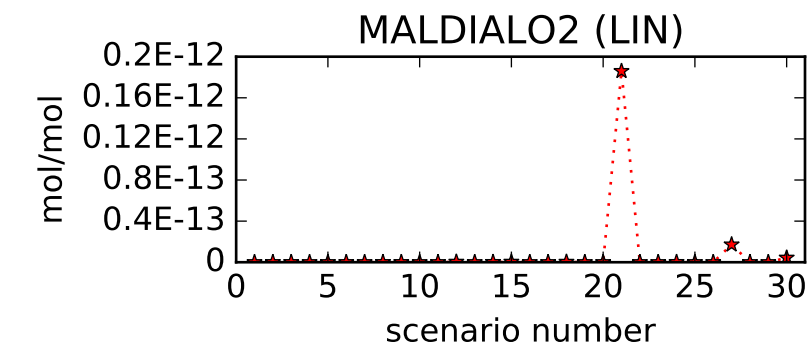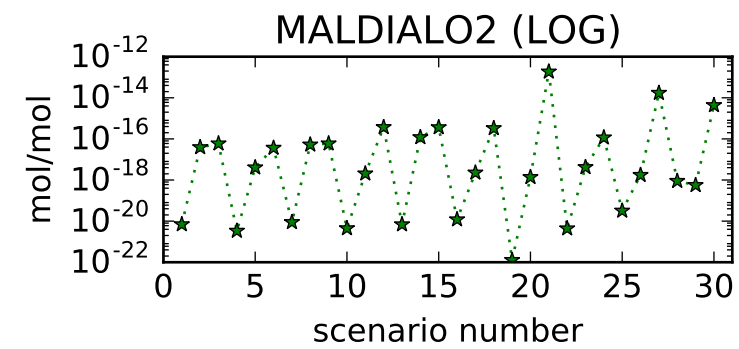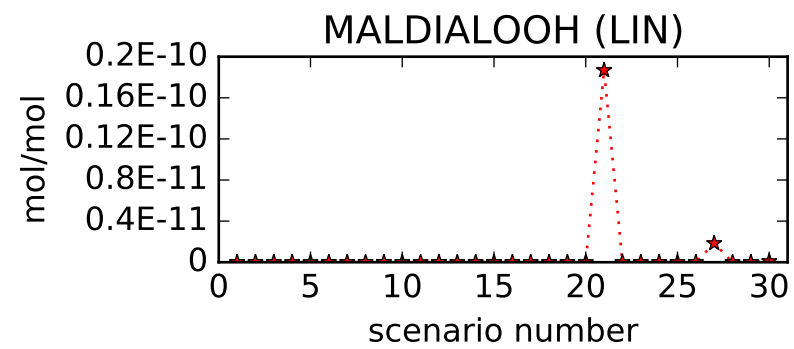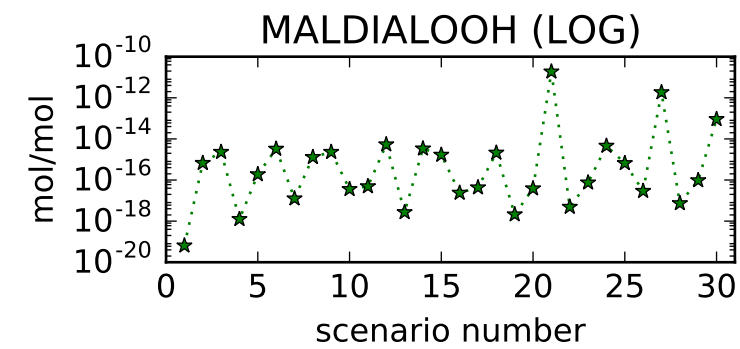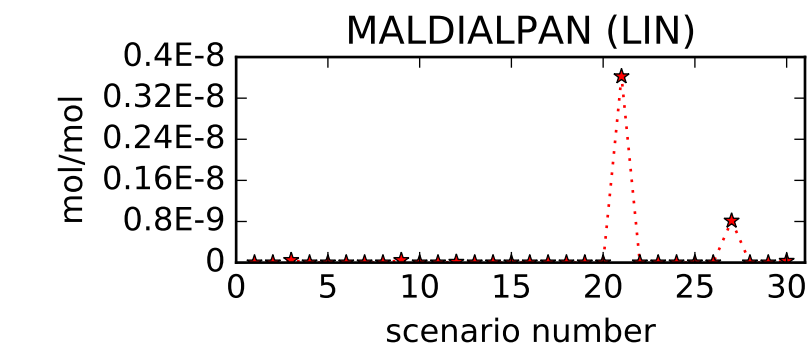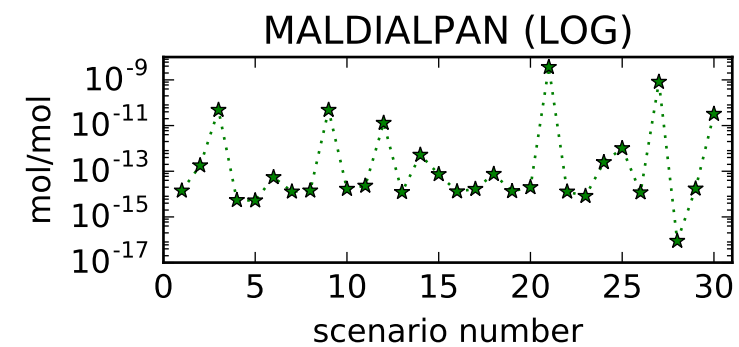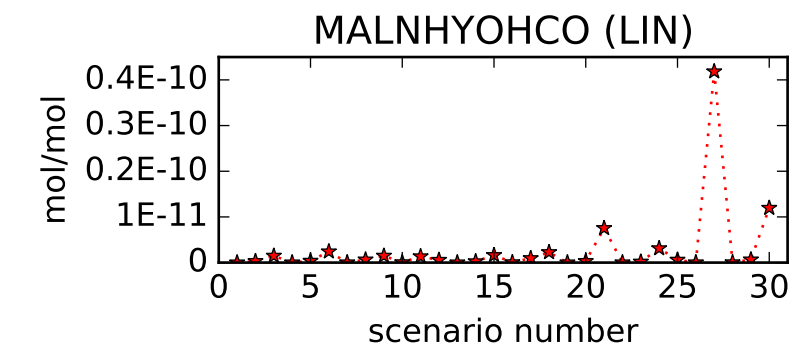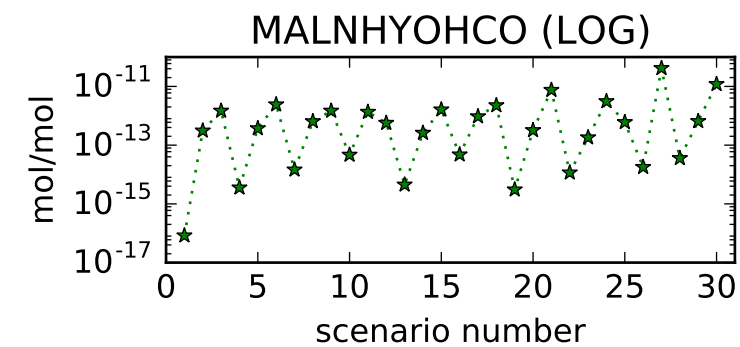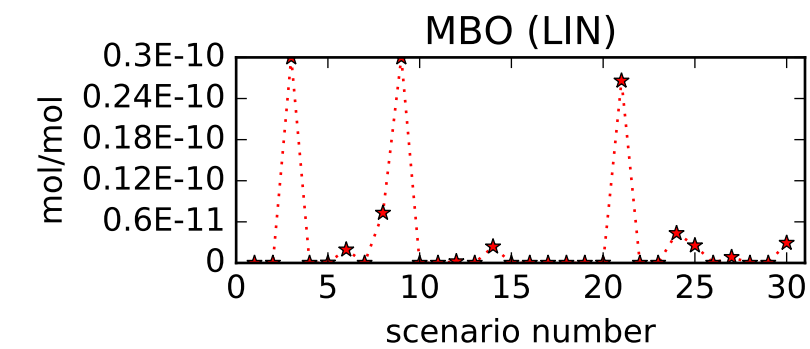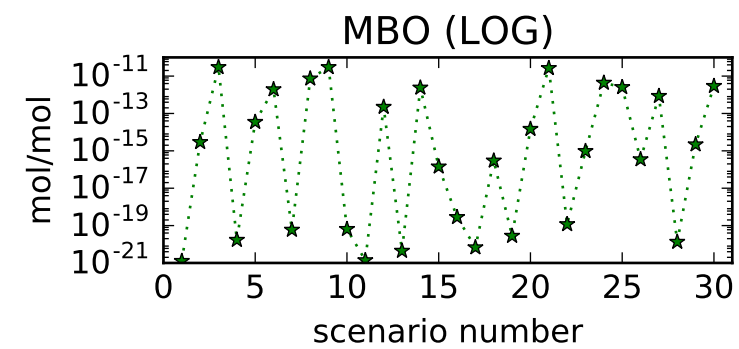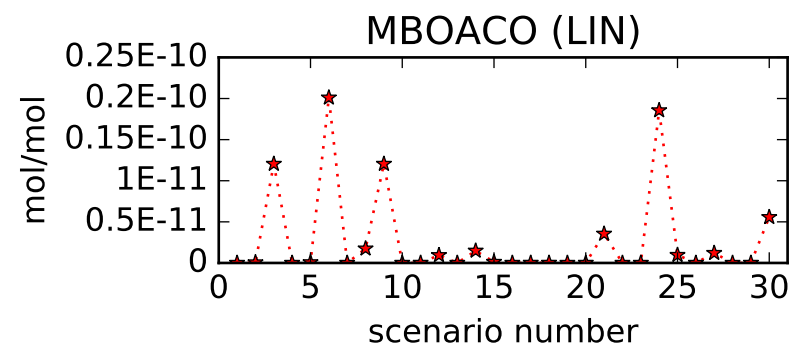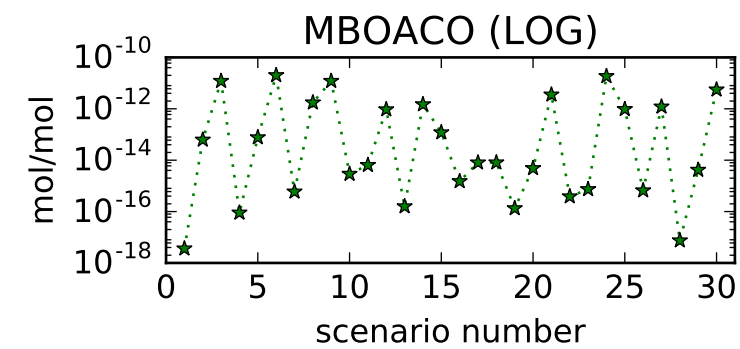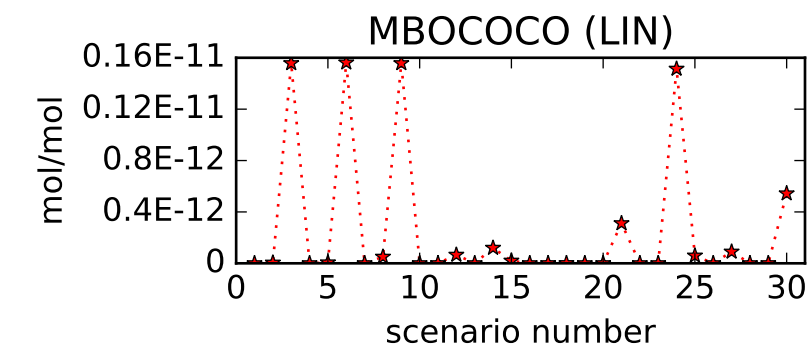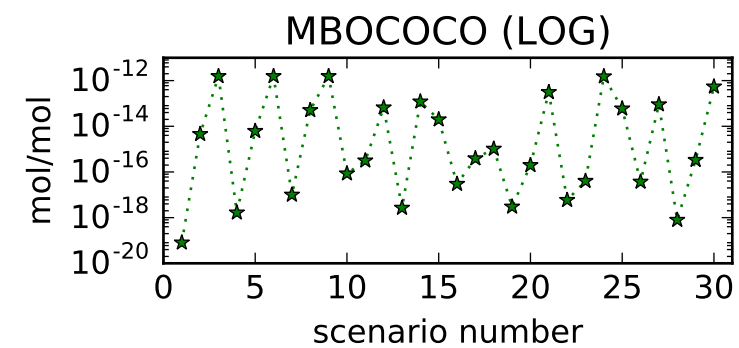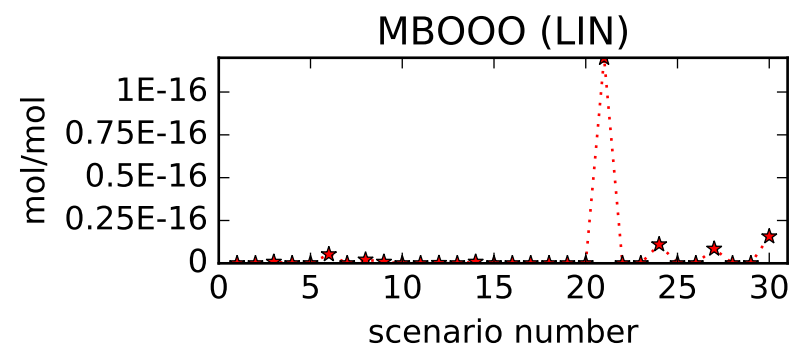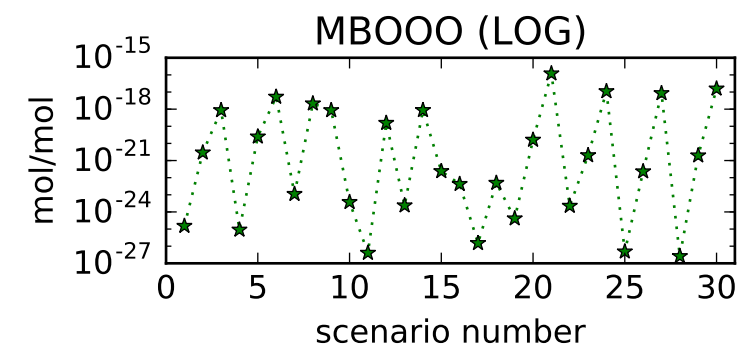

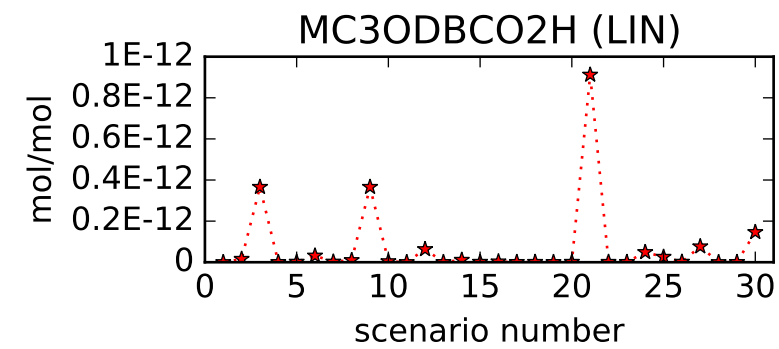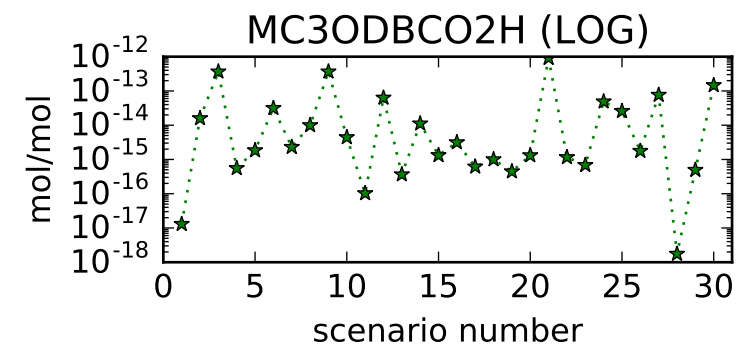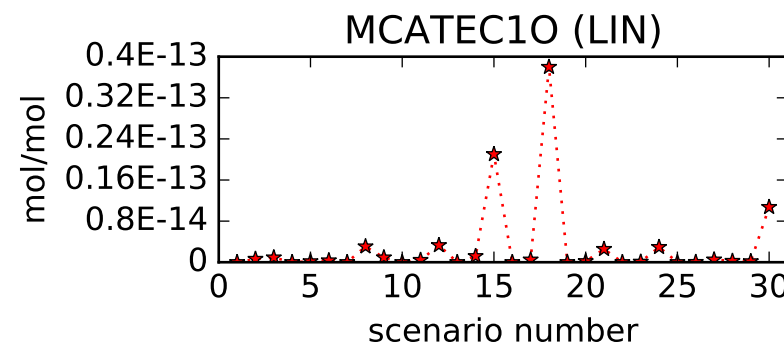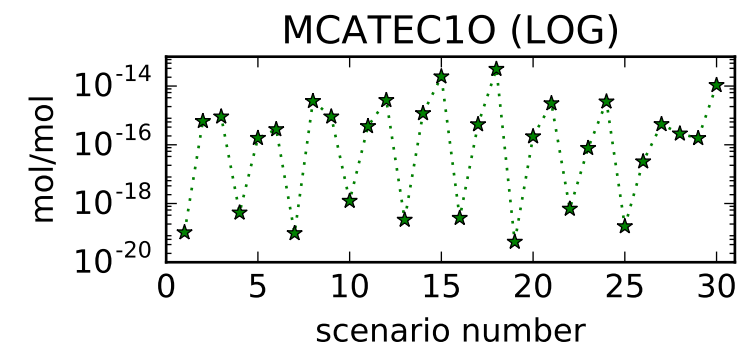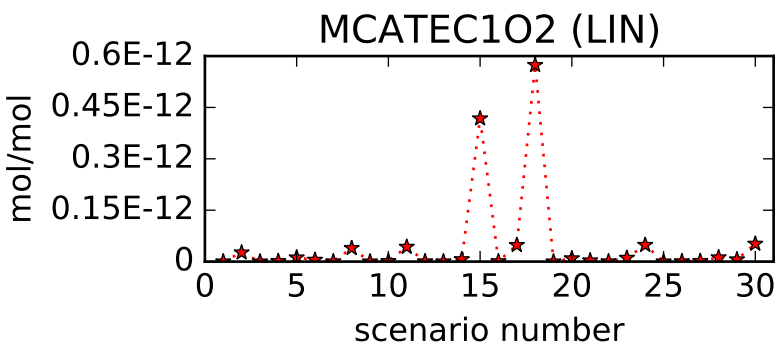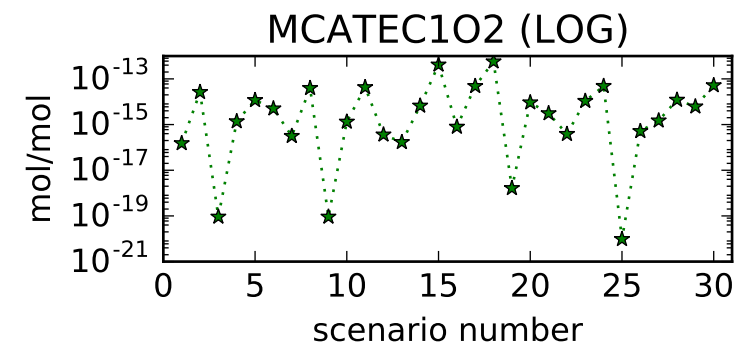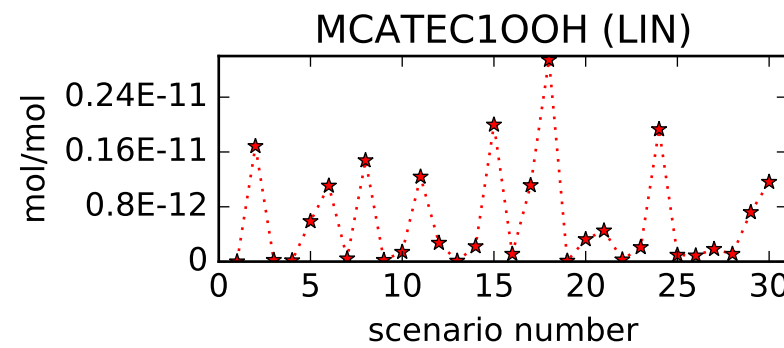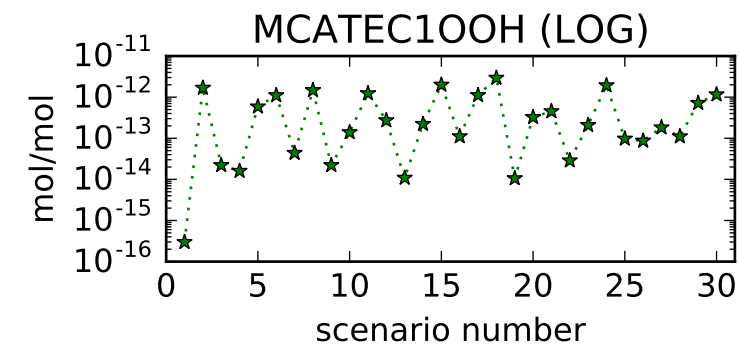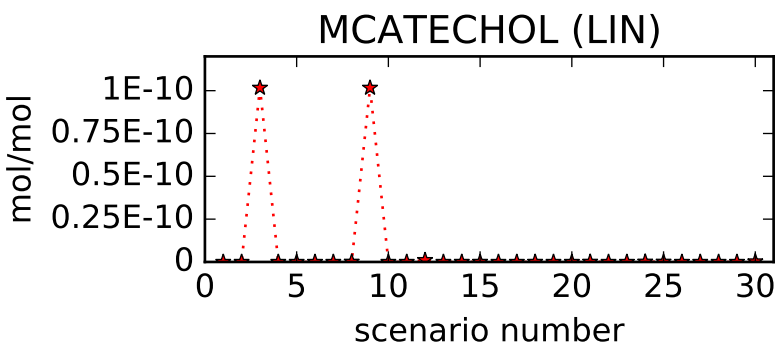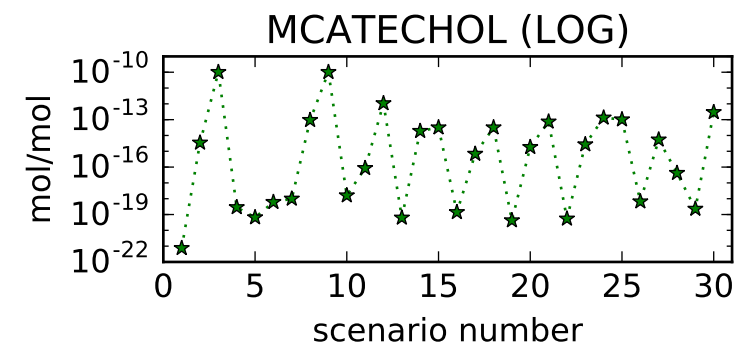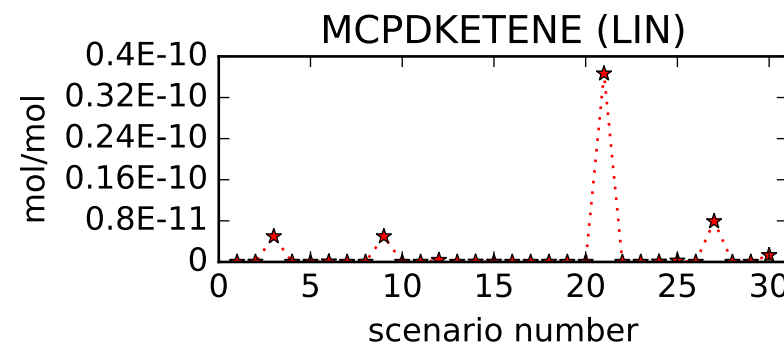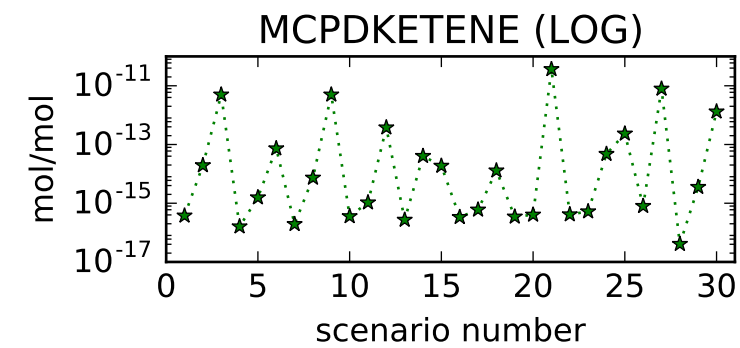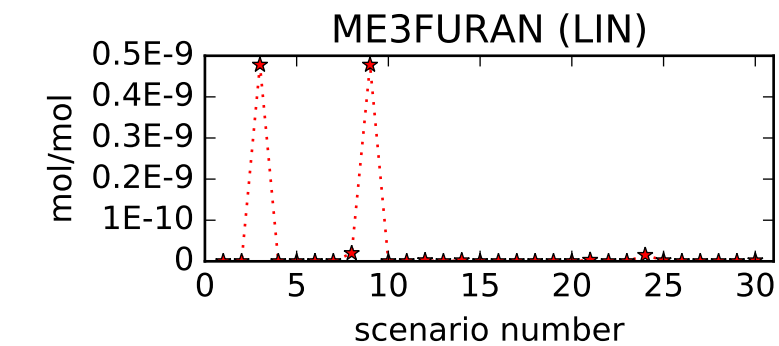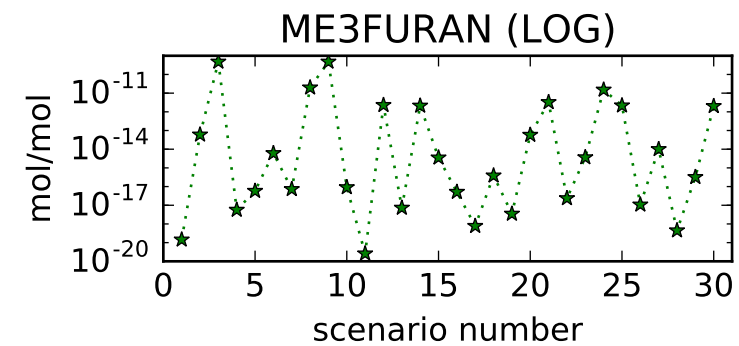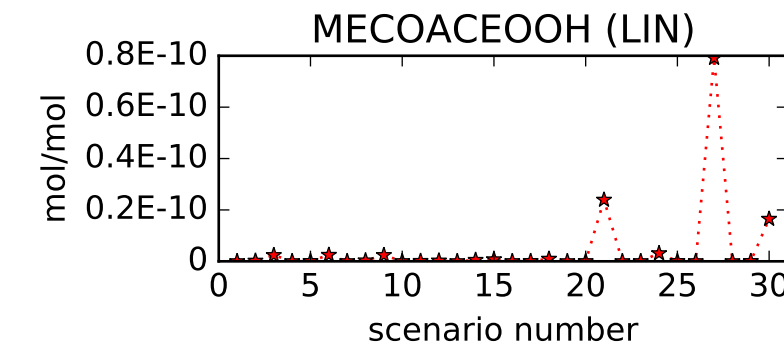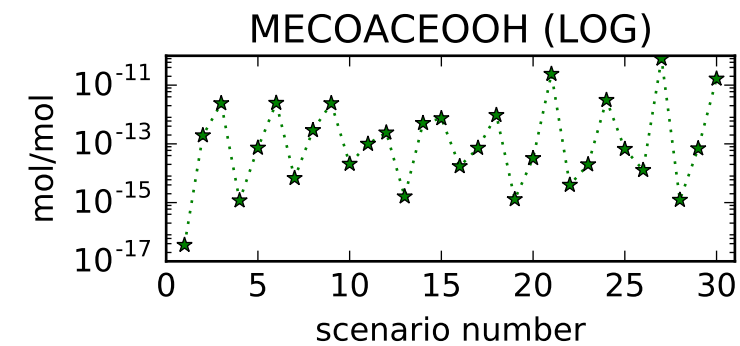

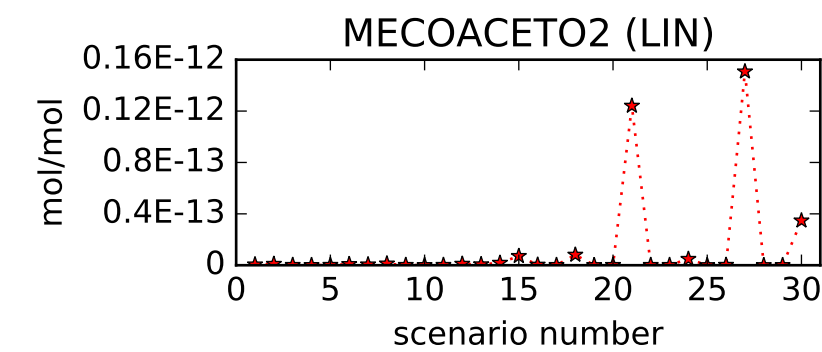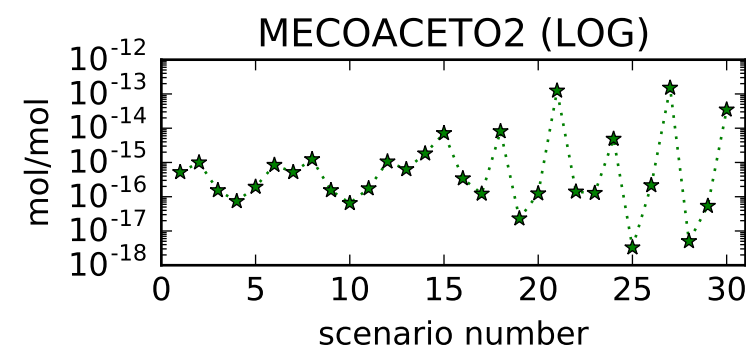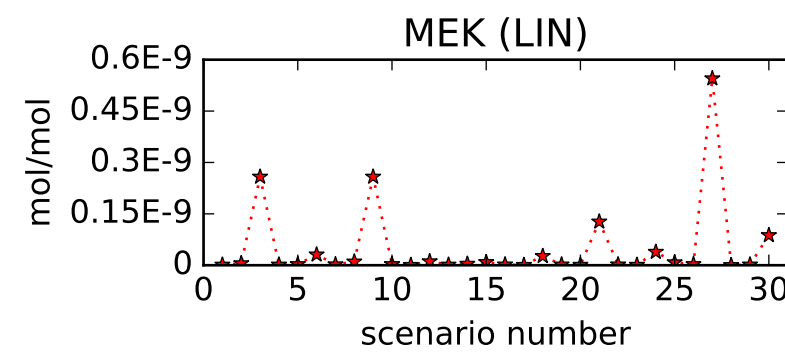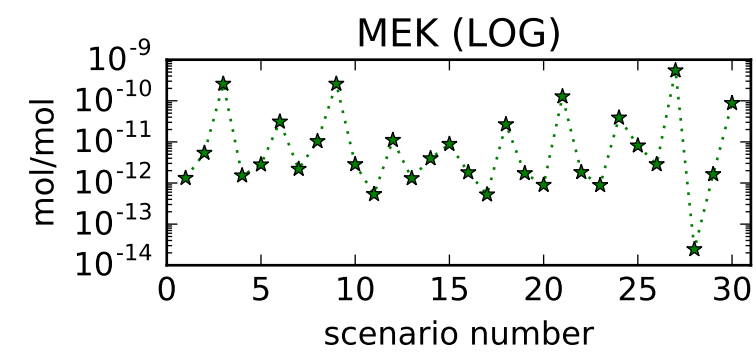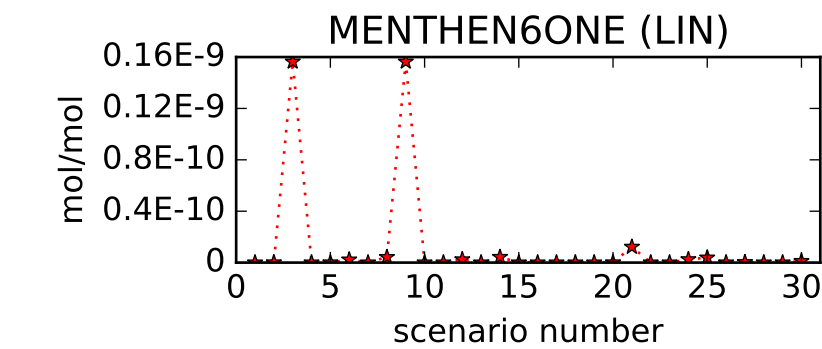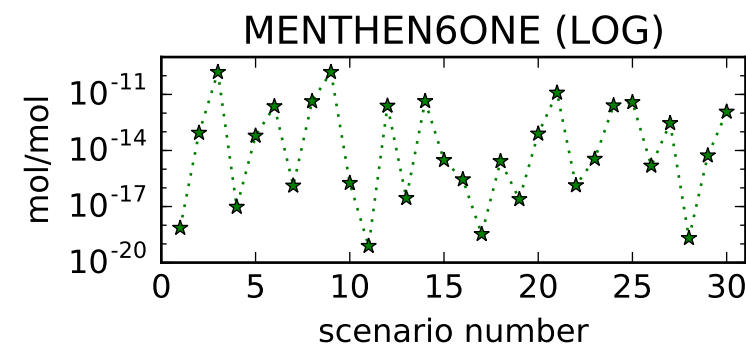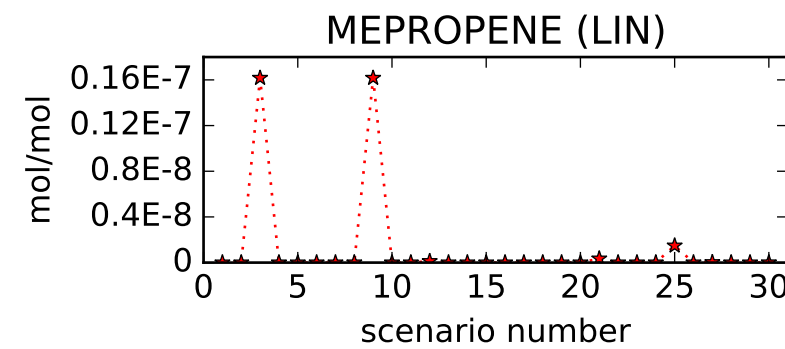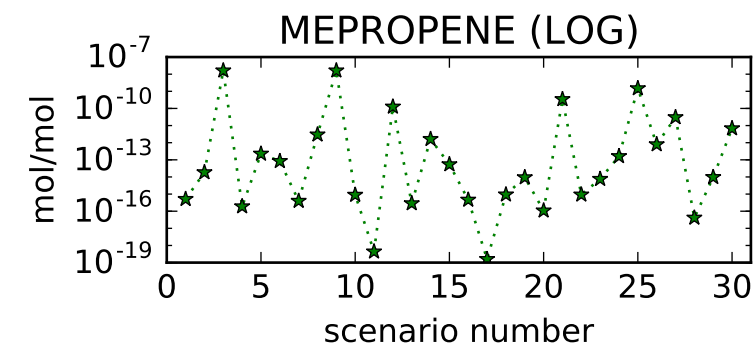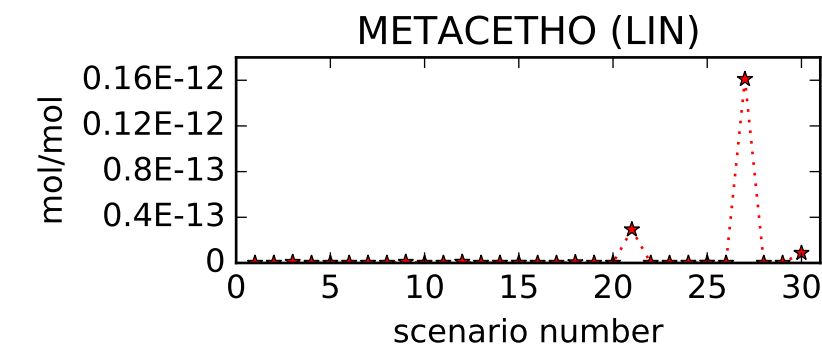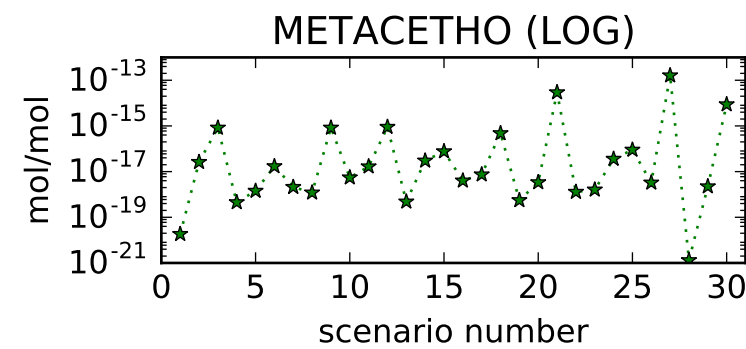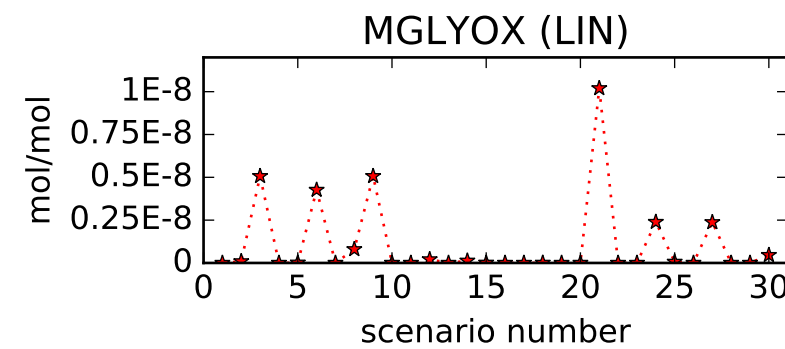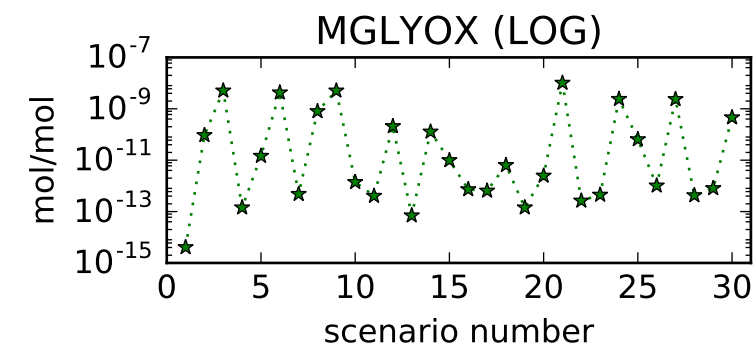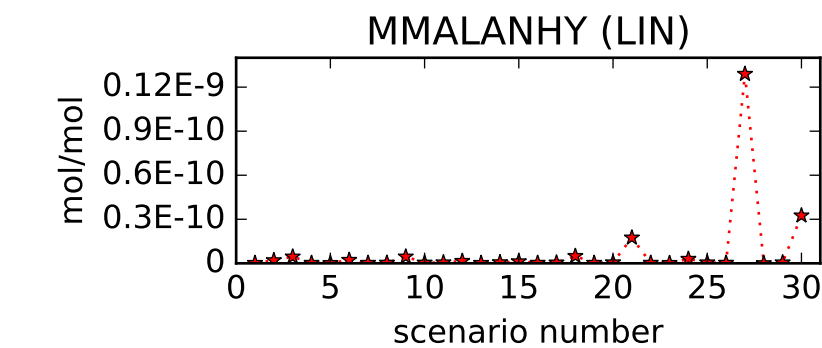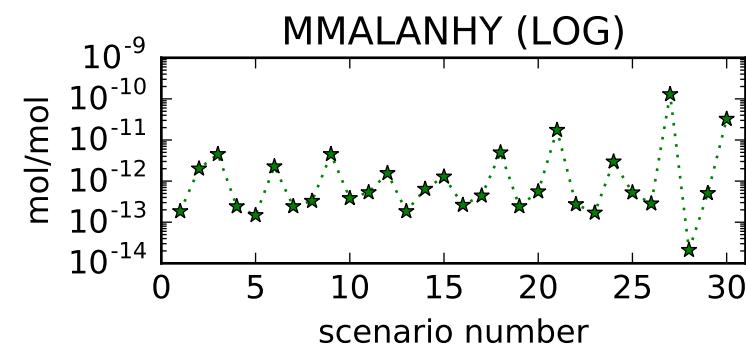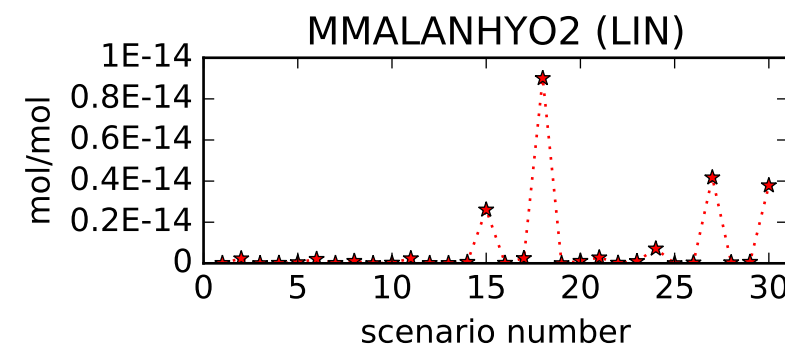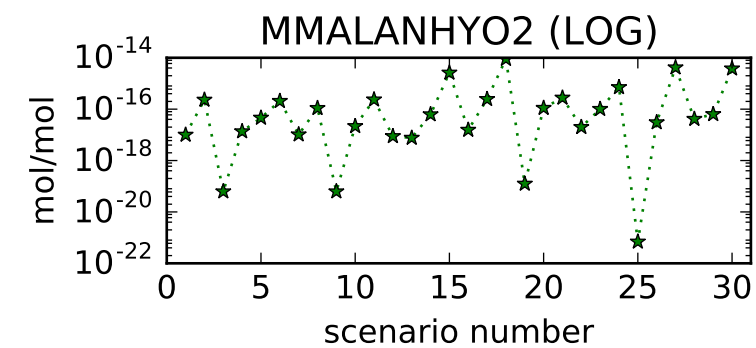



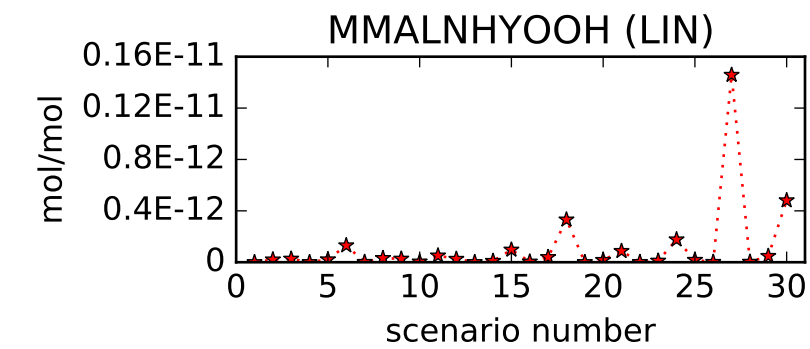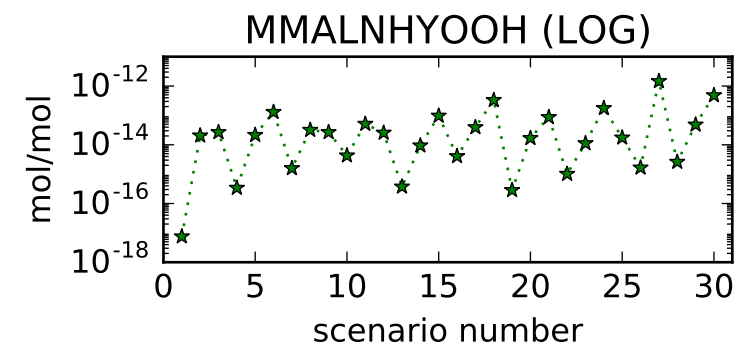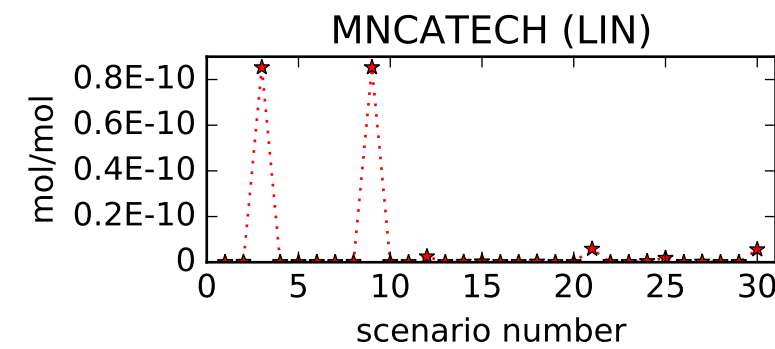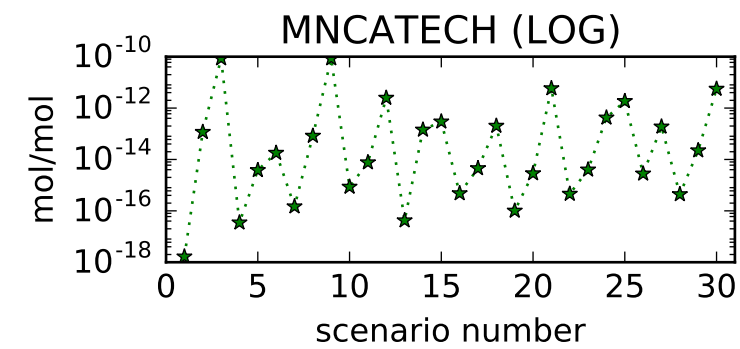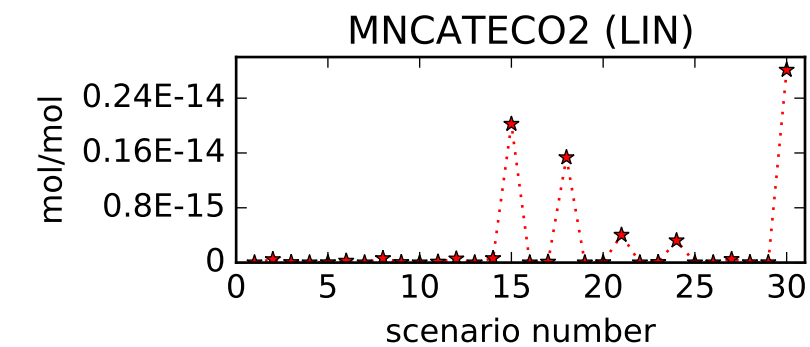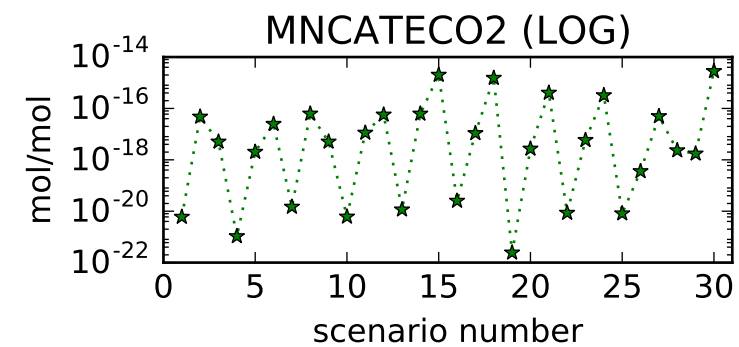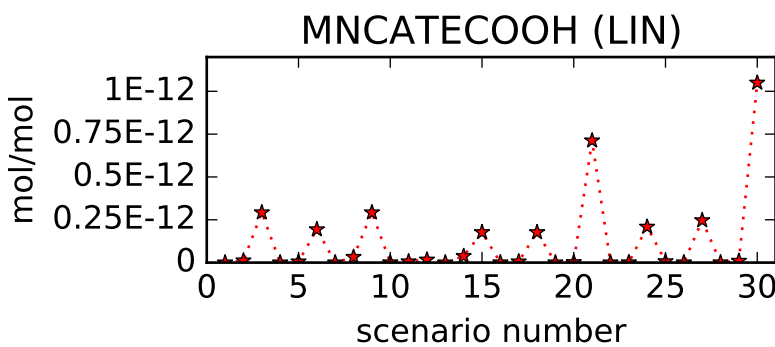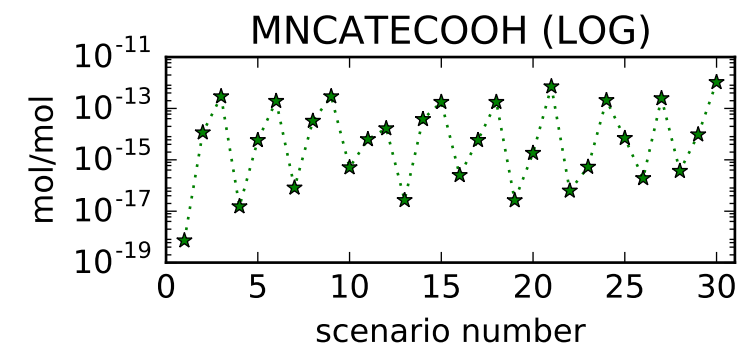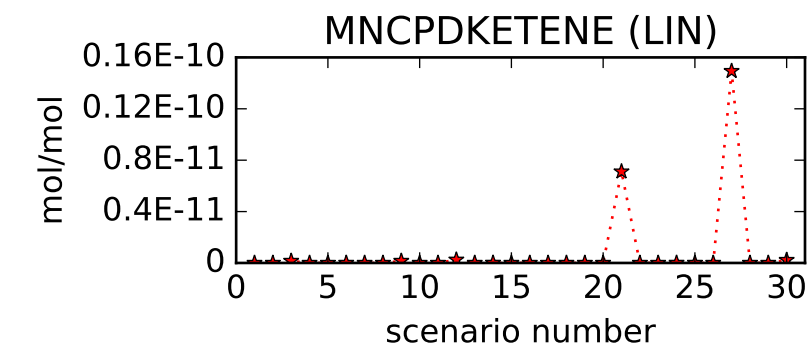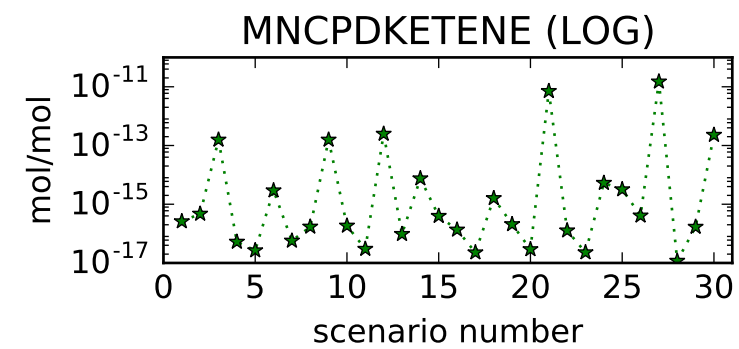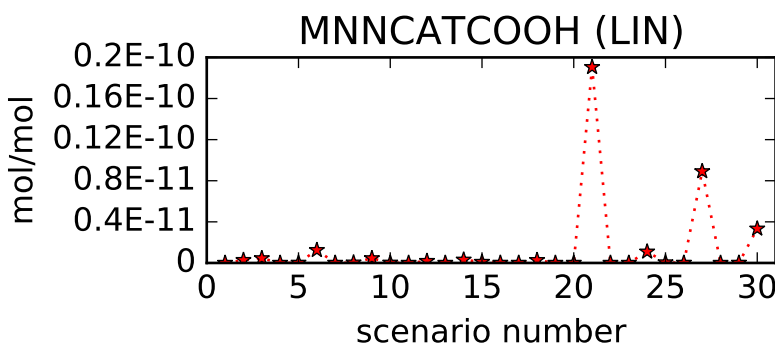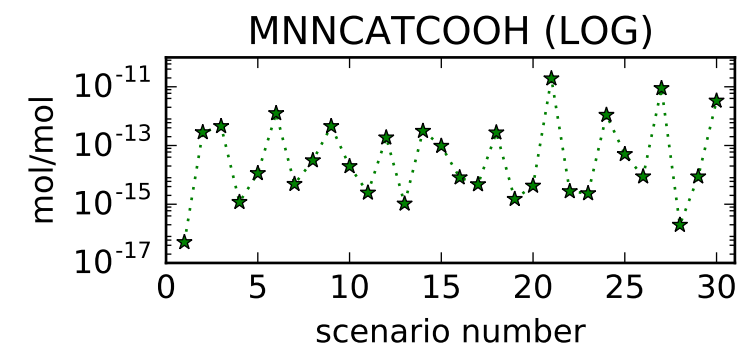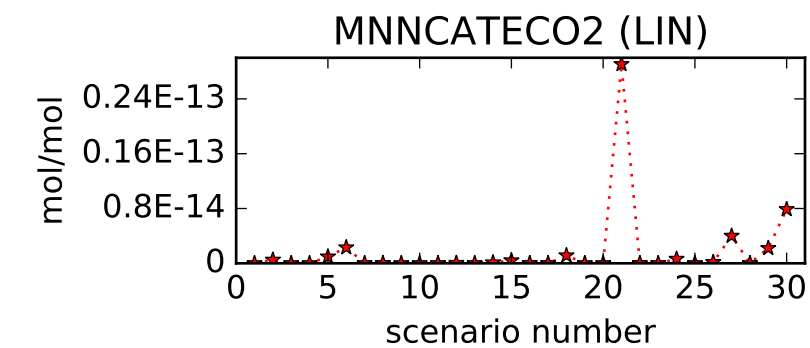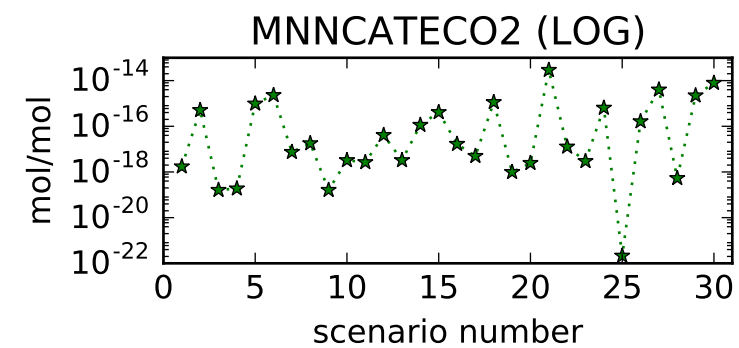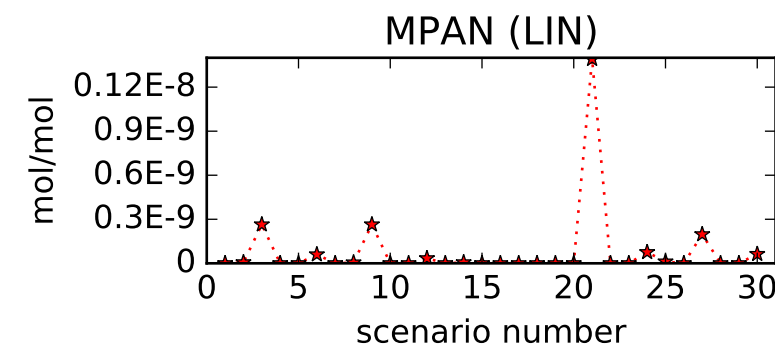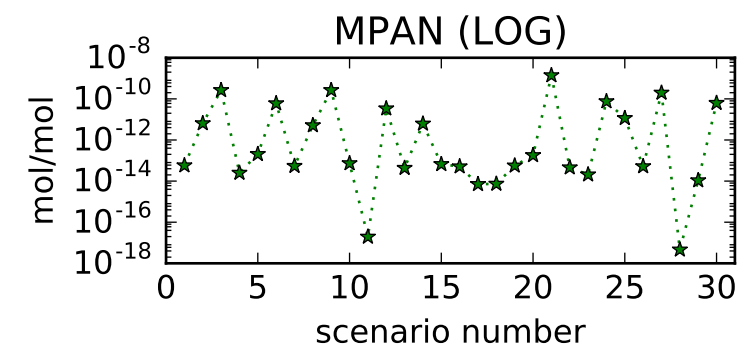

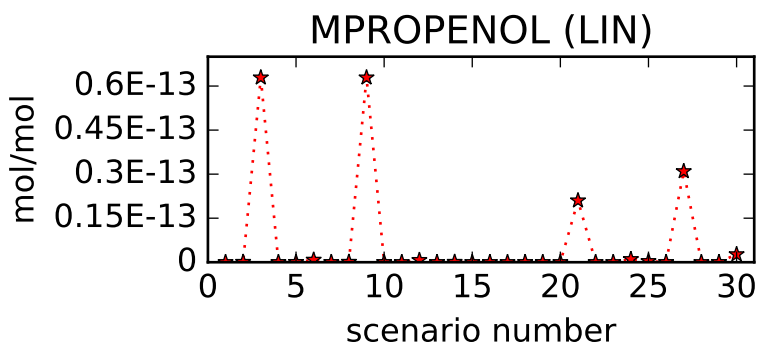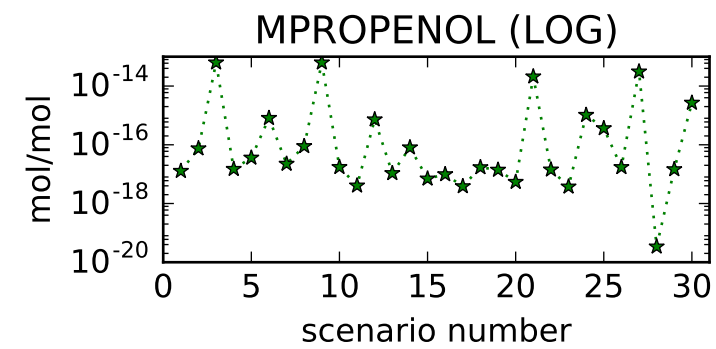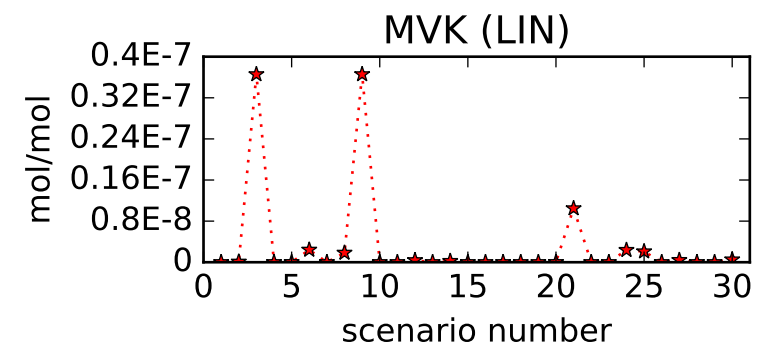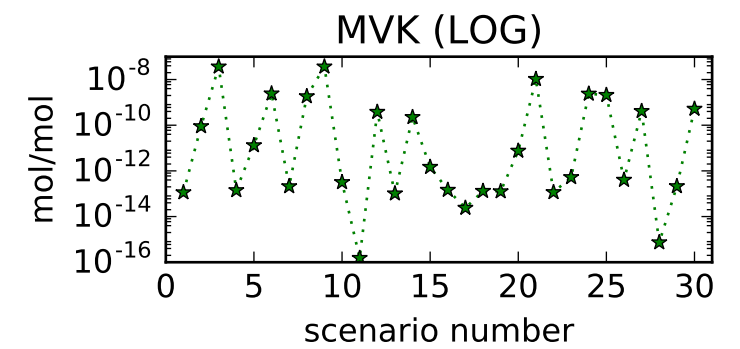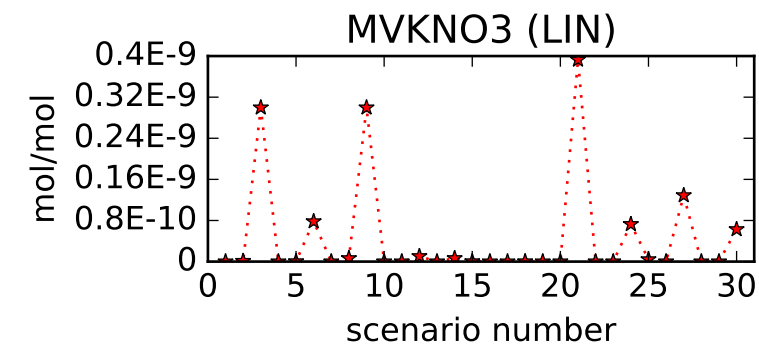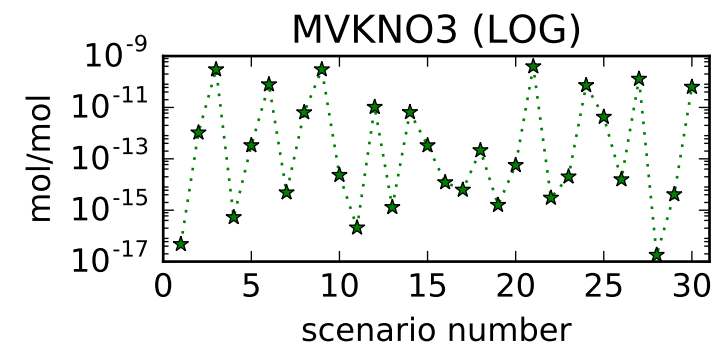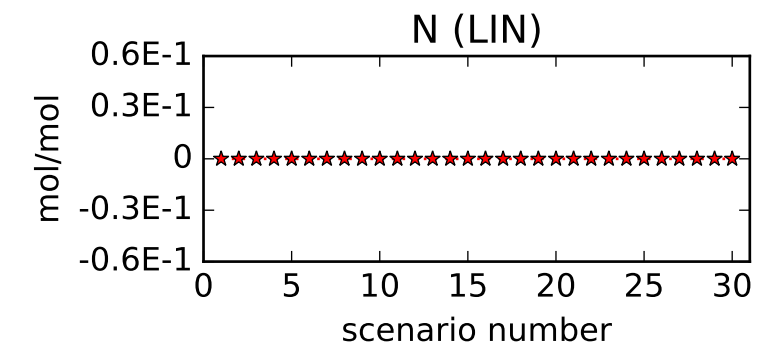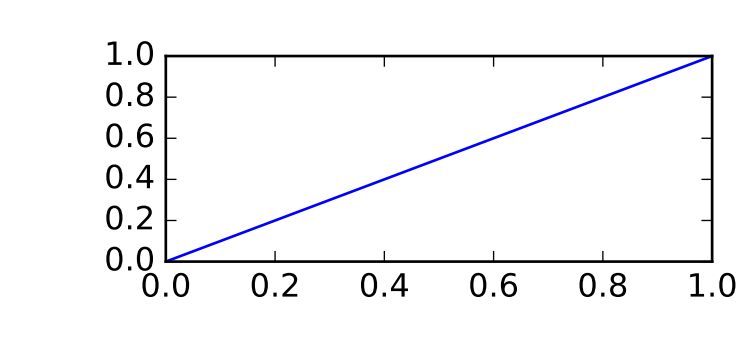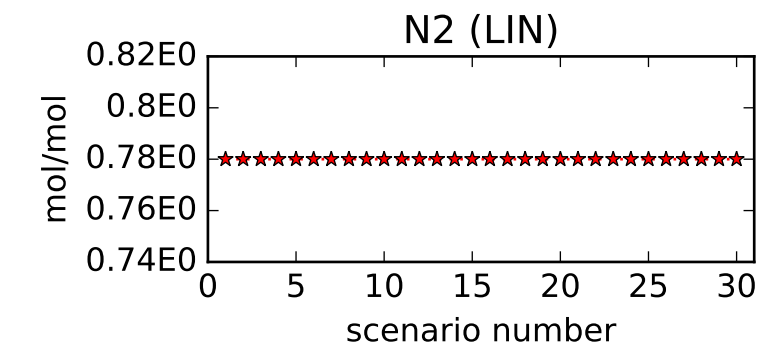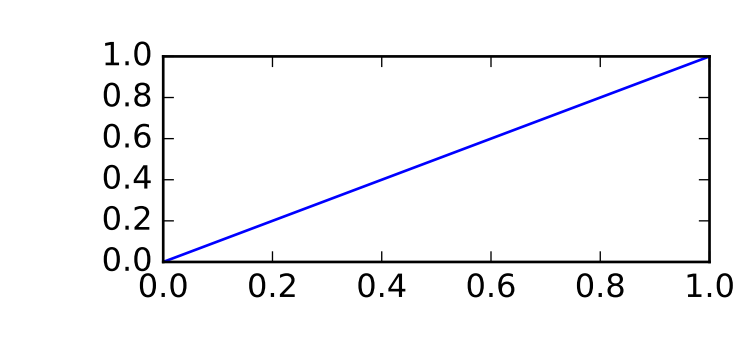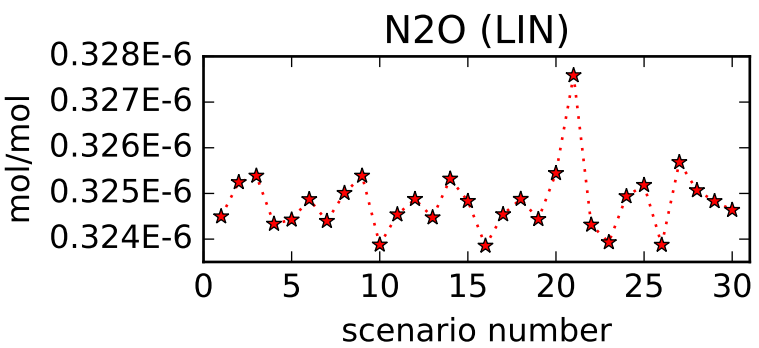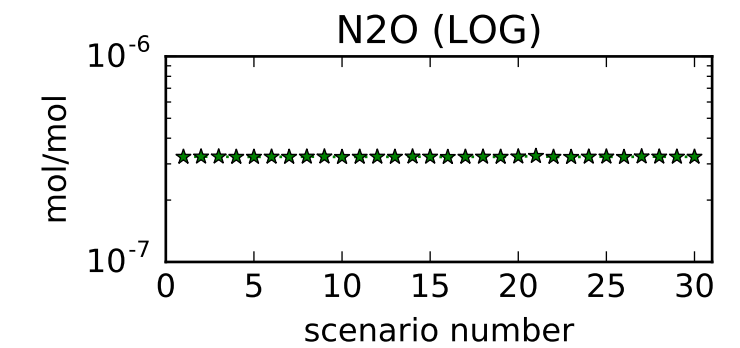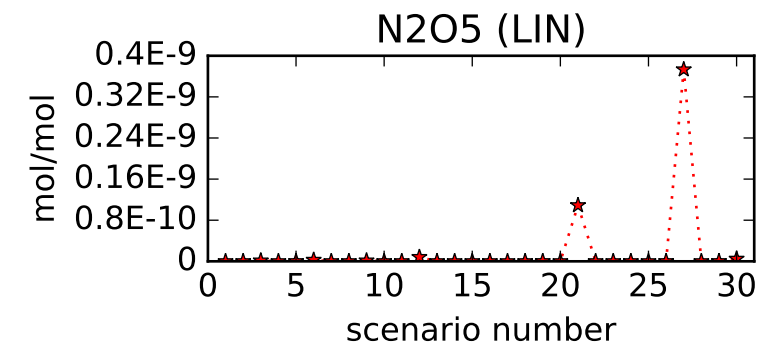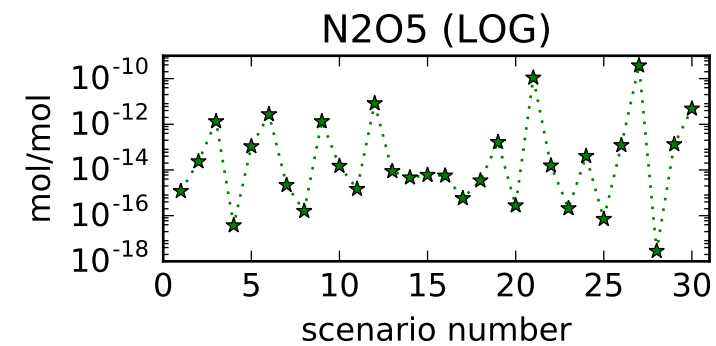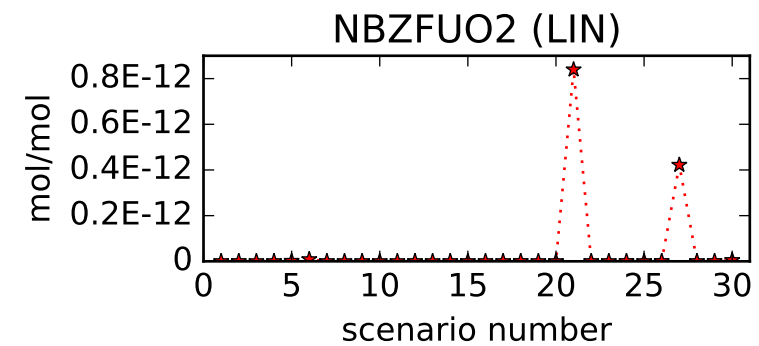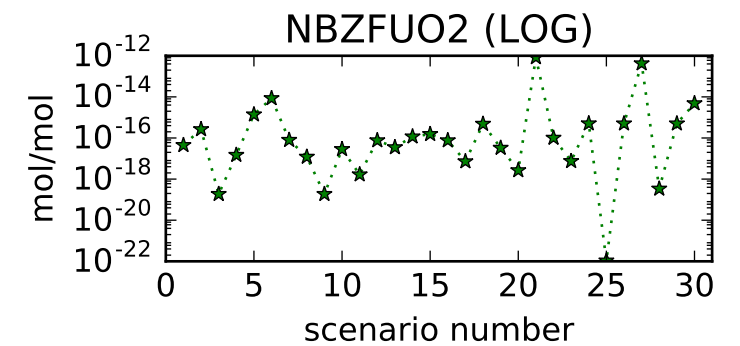

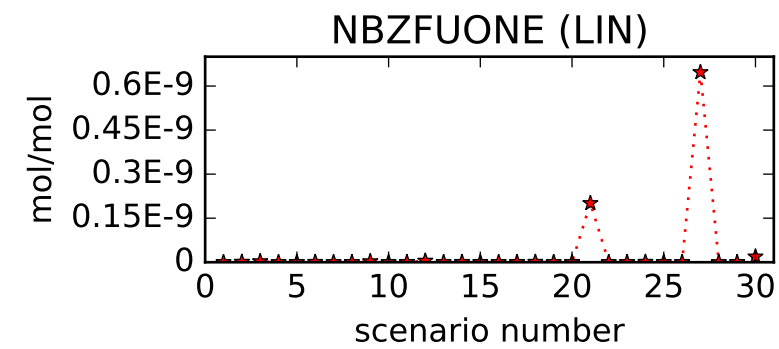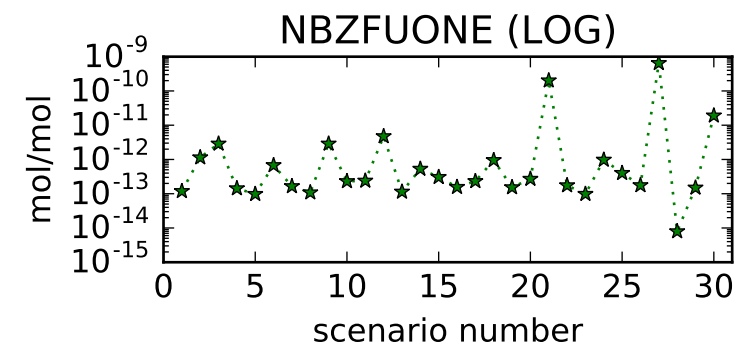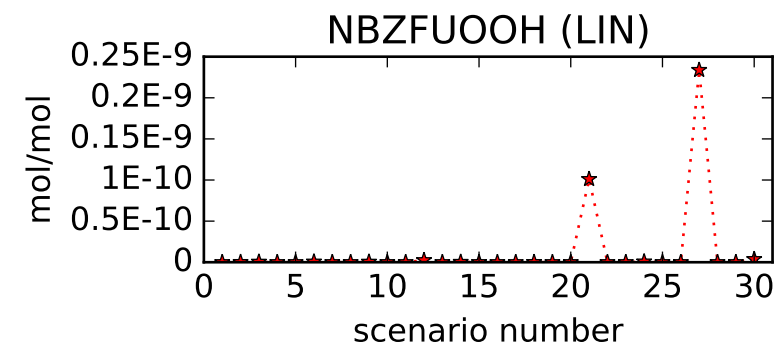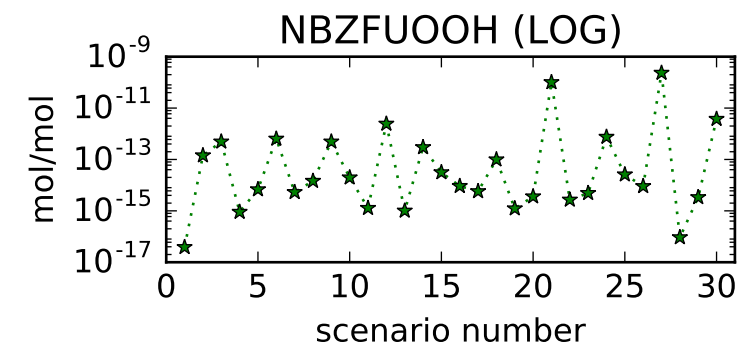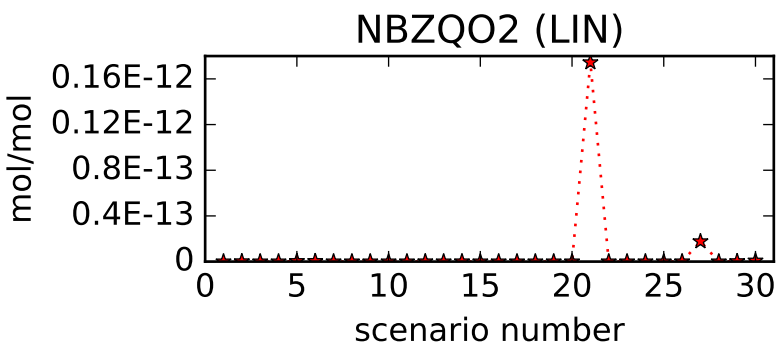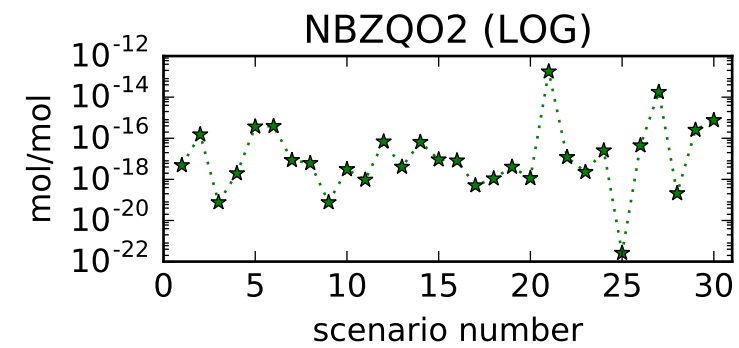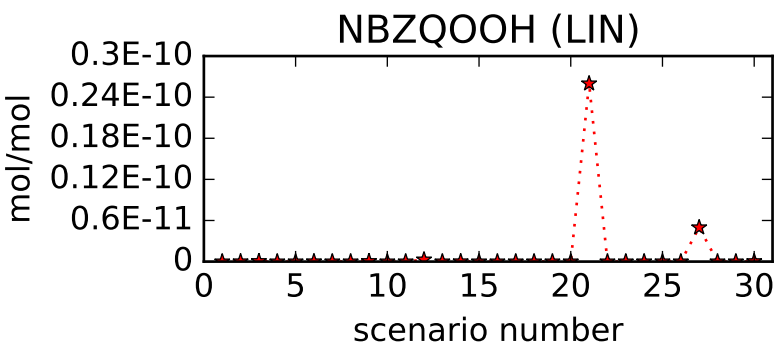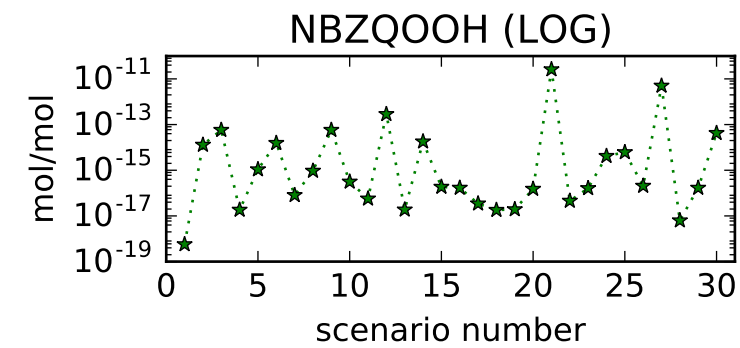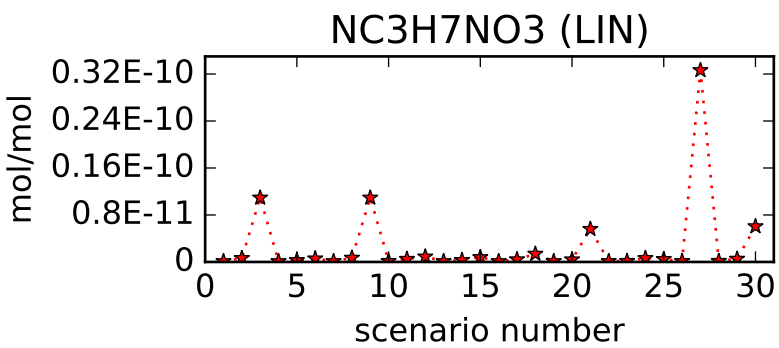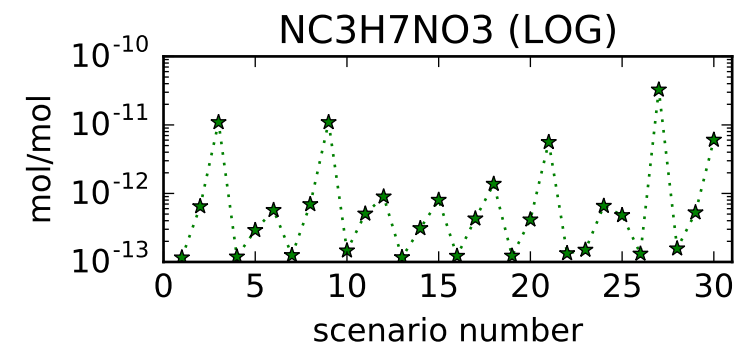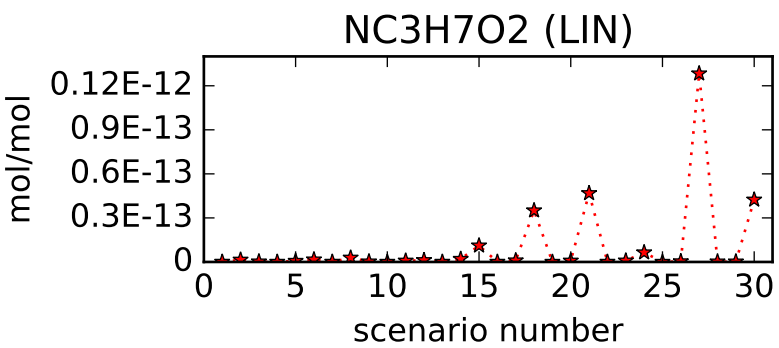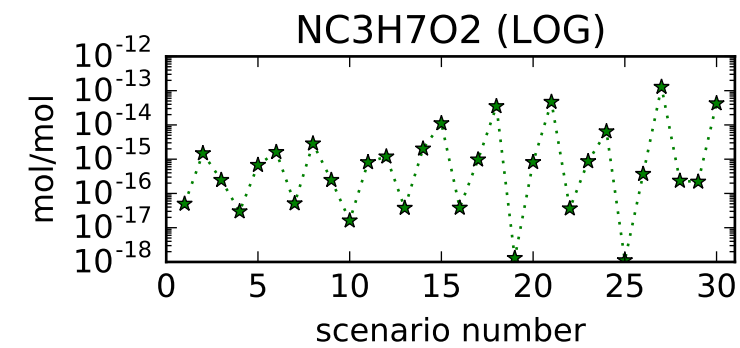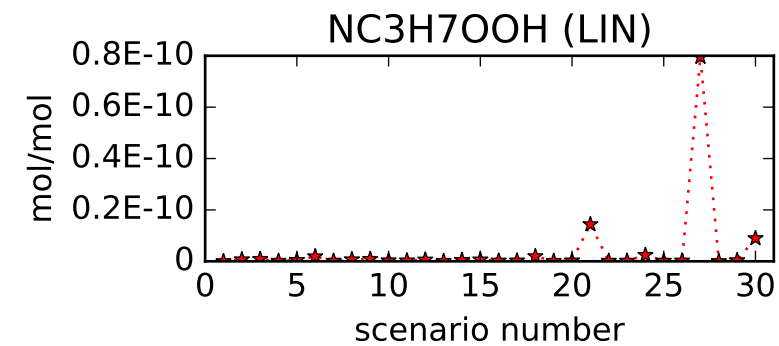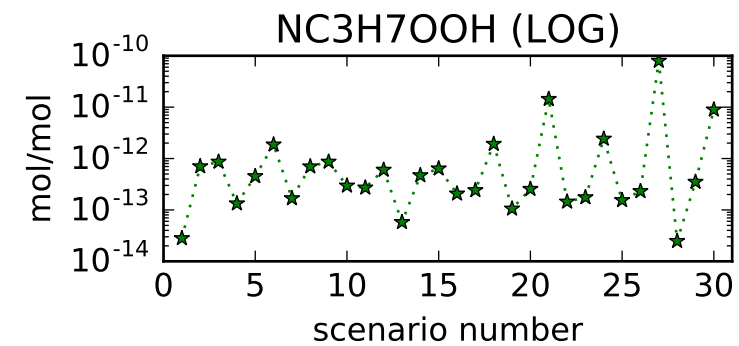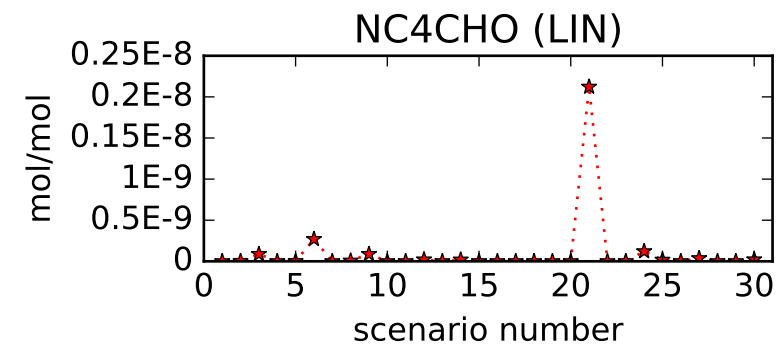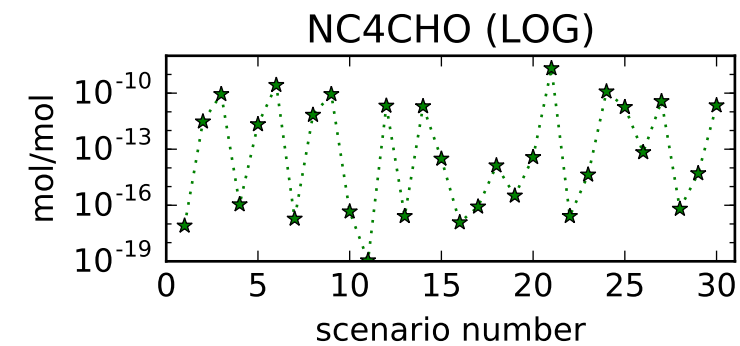

NC4DCO2H (LIN)

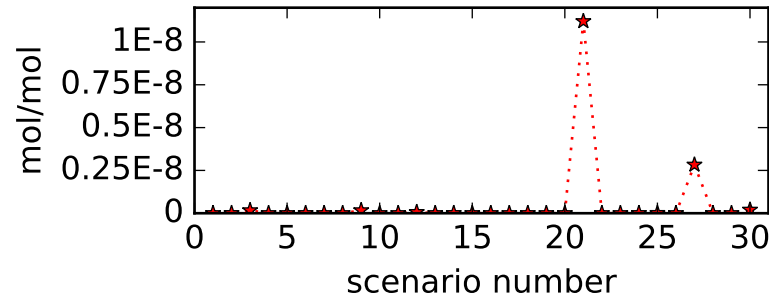

NC4DCO2H (LOG)

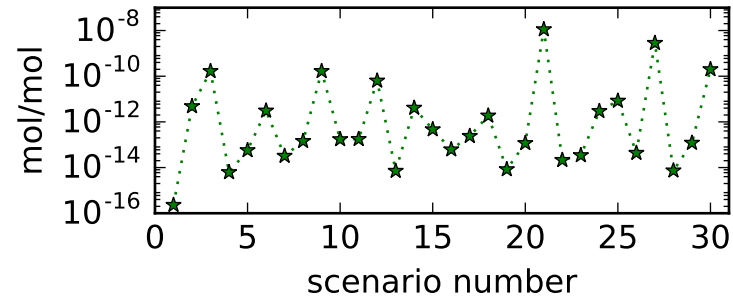

NC4H10 (LIN)

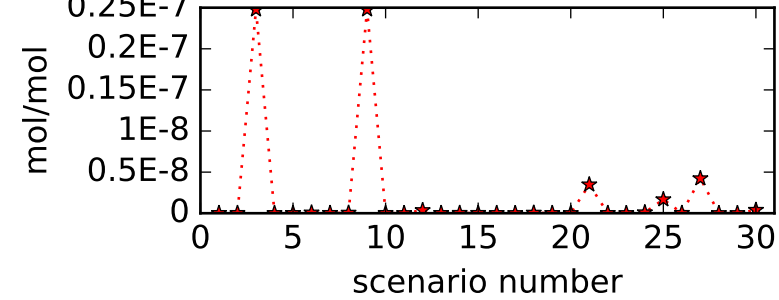

NC4H10 (LOG)

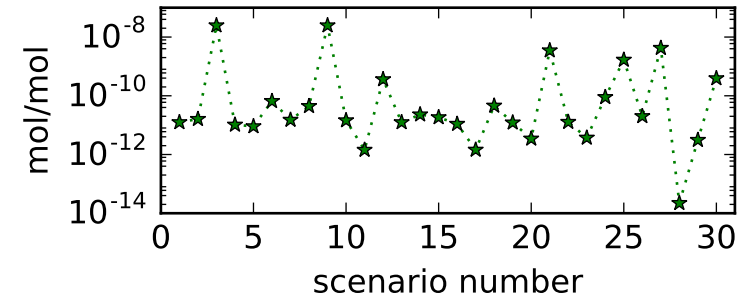

NC4MDCO2H (LIN)

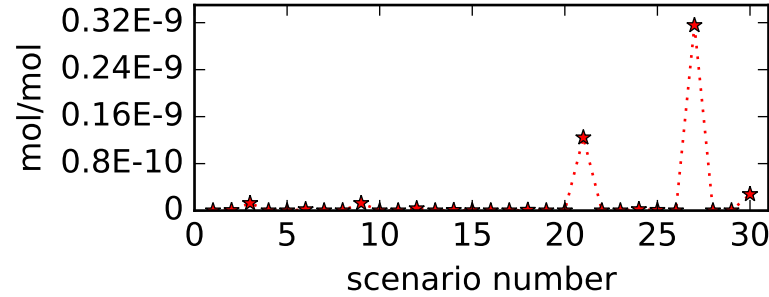

NC4MDCO2H (LOG)

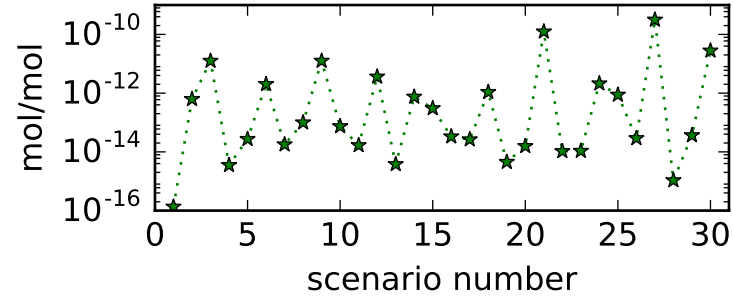

NC4OHCO3 (LIN)

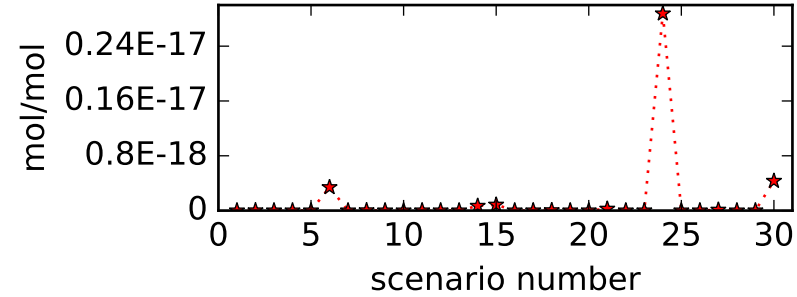

NC4OHCO3 (LOG)

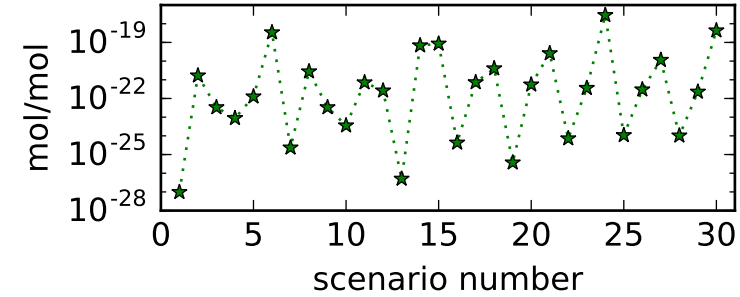

NC4OHCO3H (LIN)

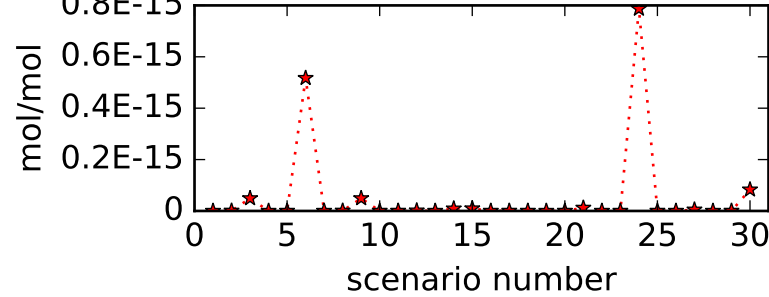

NC4OHCO3H (LOG)

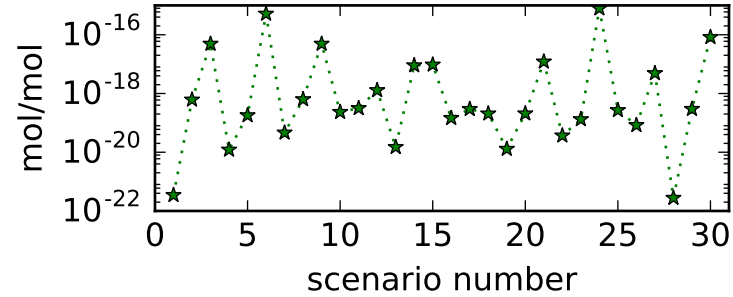

NC4OHCPAN (LIN)

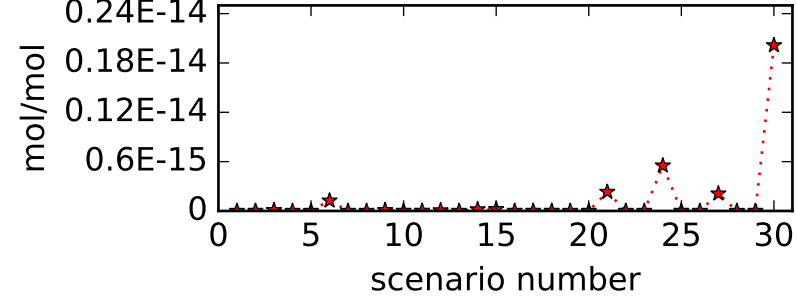

NC4OHCPAN (LOG)

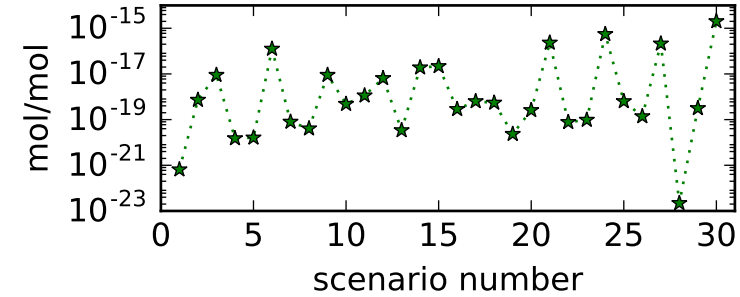

NCATECHOL (LIN)

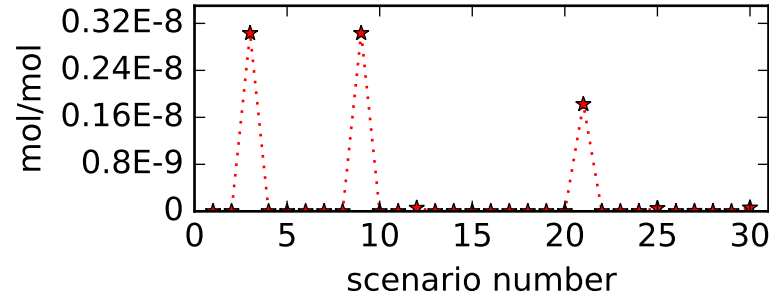

NCATECHOL (LOG)

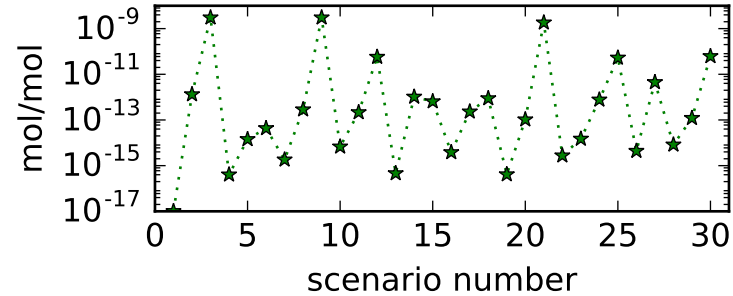

NCATECO2 (LIN)

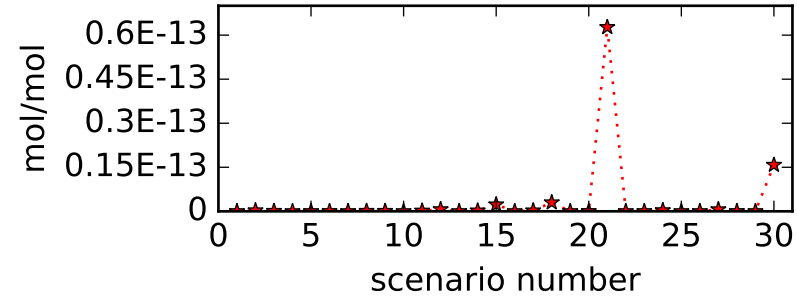

NCATECO2 (LOG)

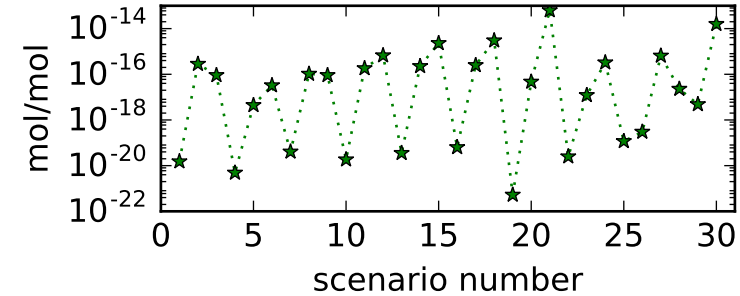

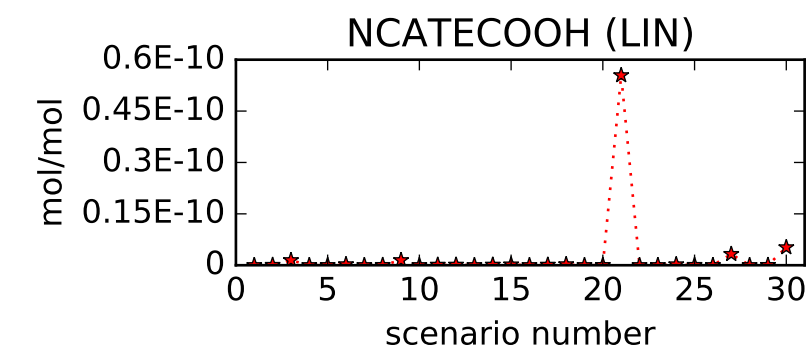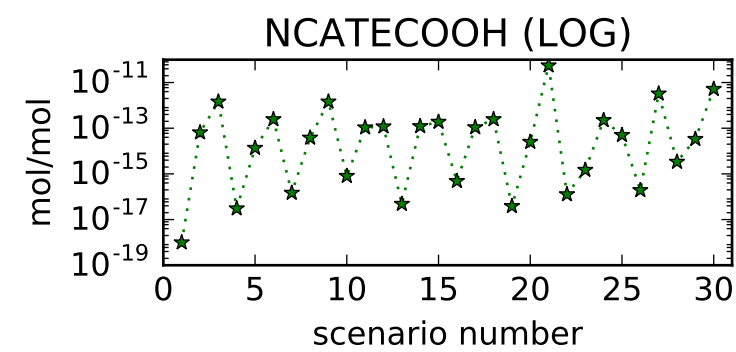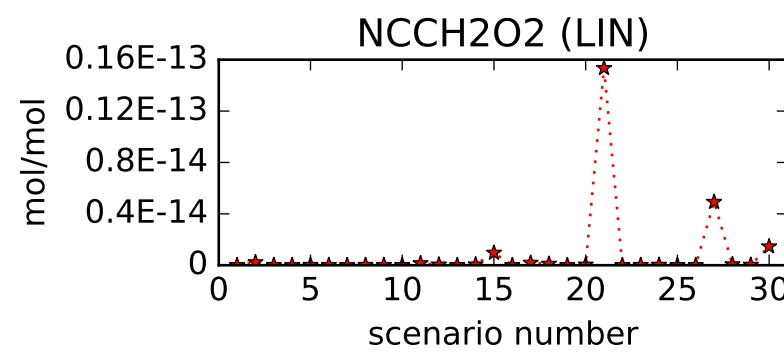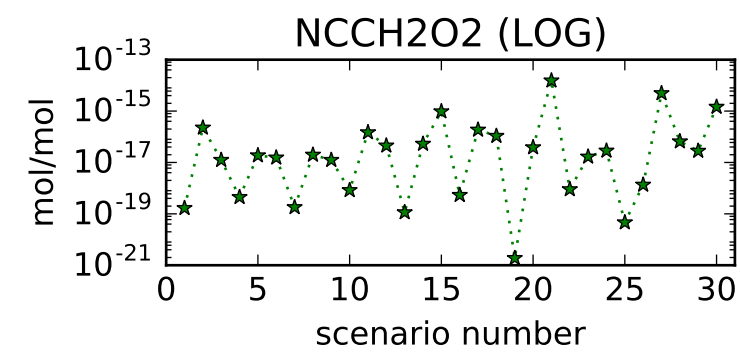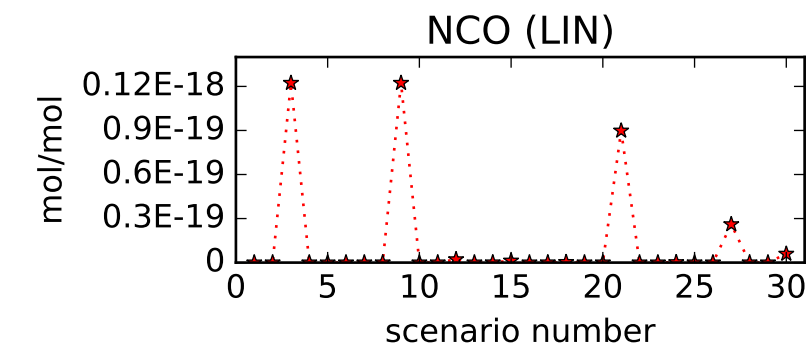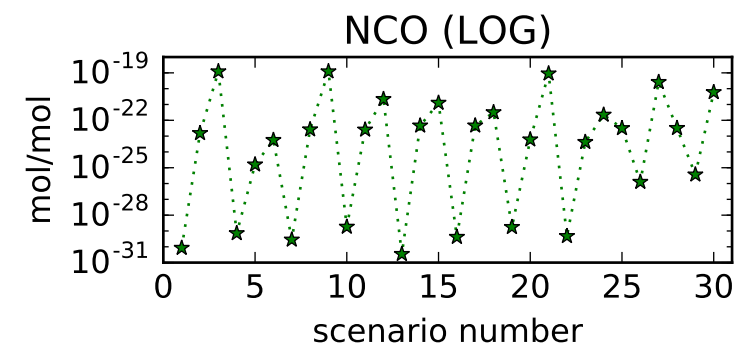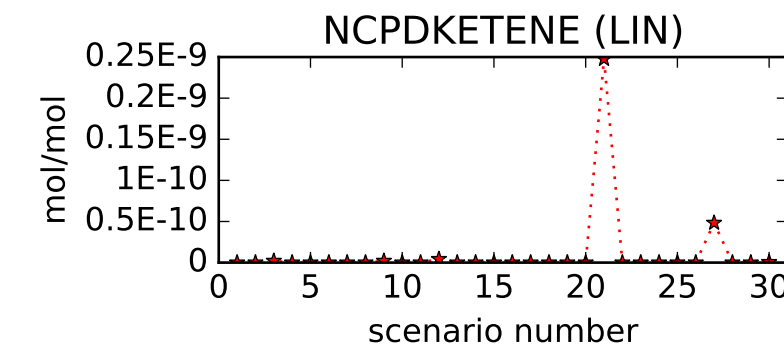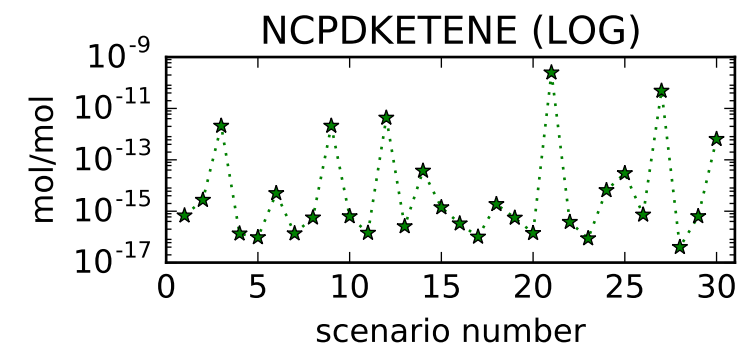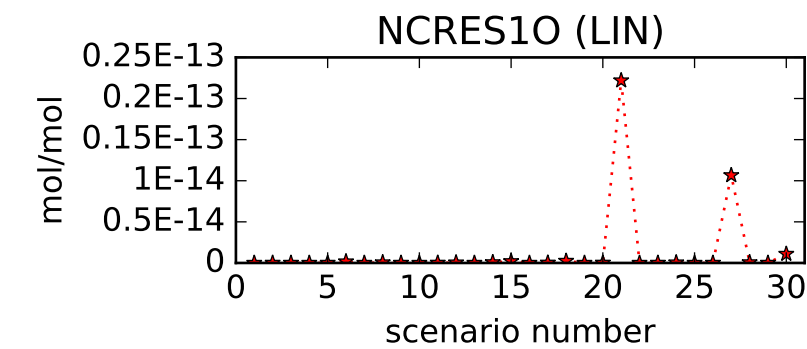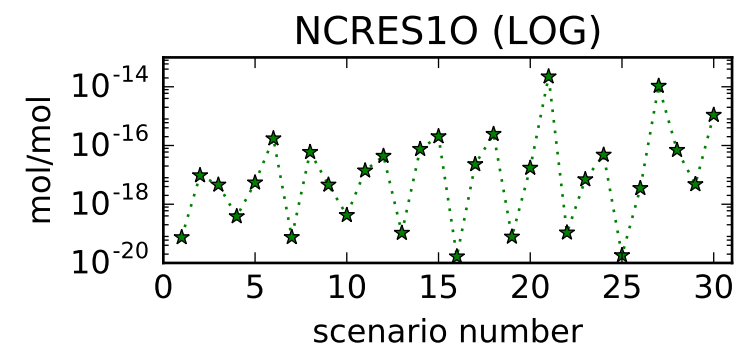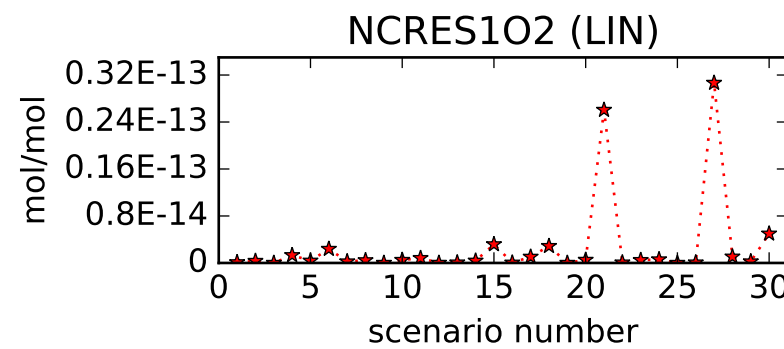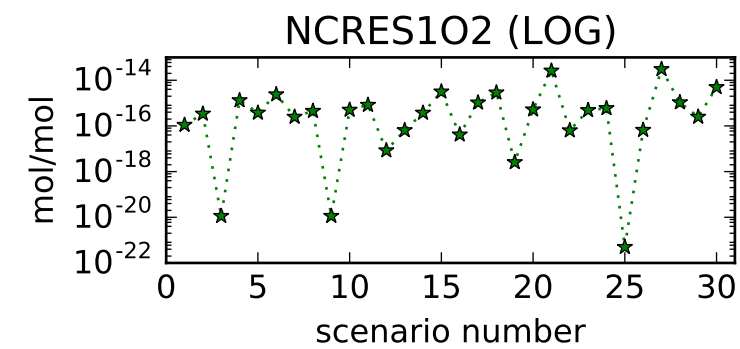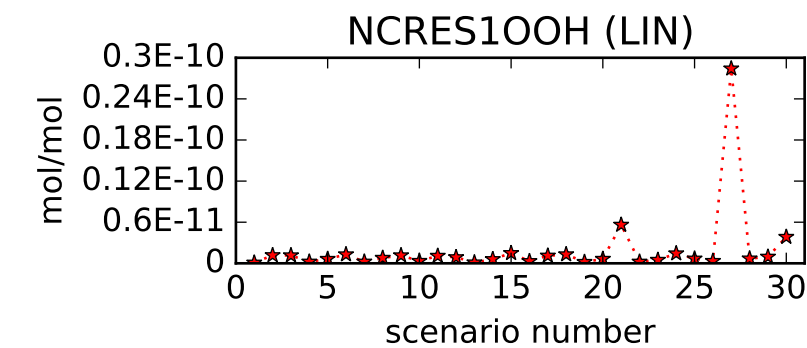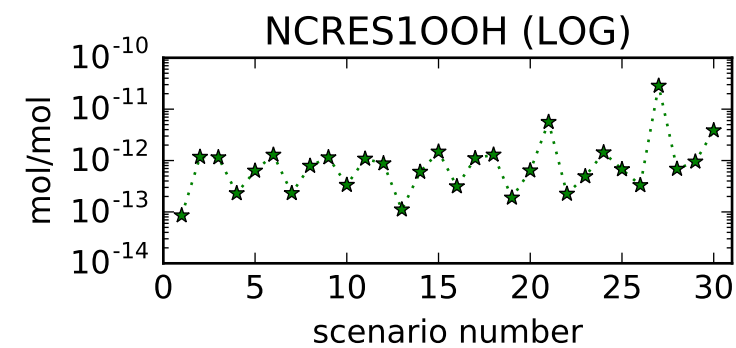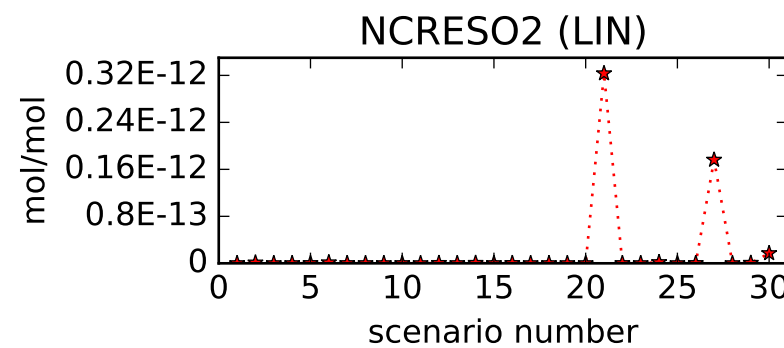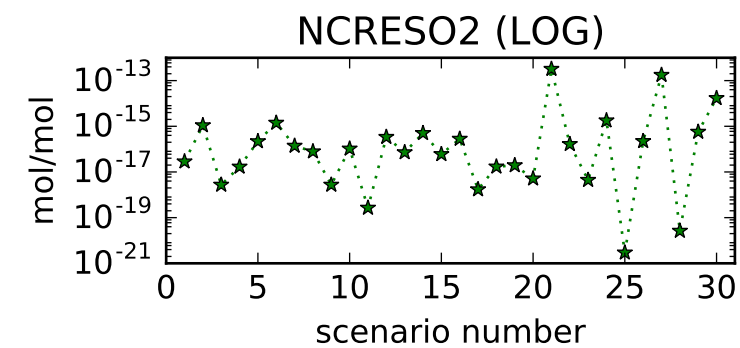



NCRESOOH (LIN)

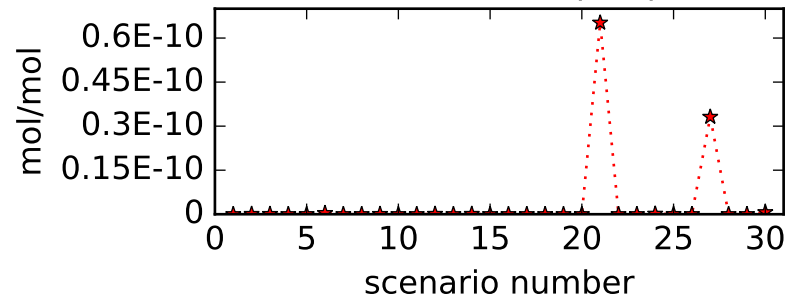

NCRESOOH (LOG)

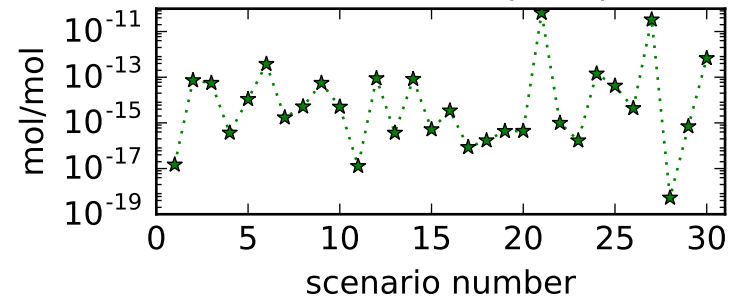

NDNCRESO2 (LIN)

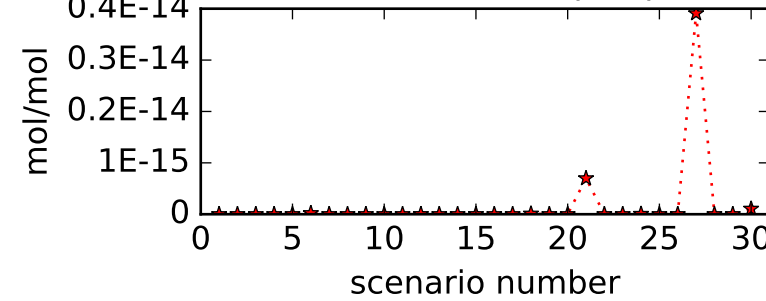

NDNCRESO2 (LOG)

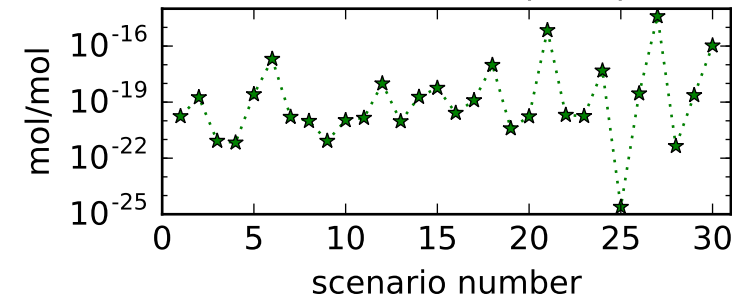

NDNCRESOOH (LIN)

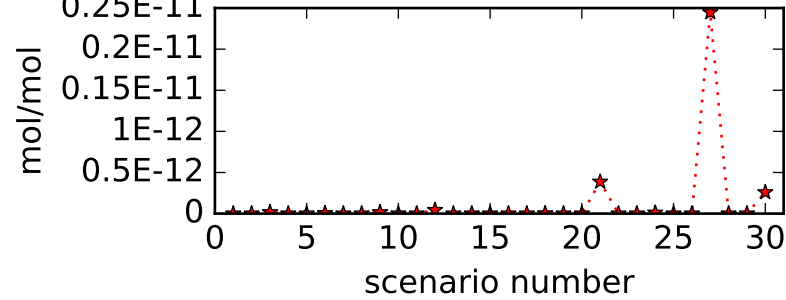

NDNCRESOOH (LOG)

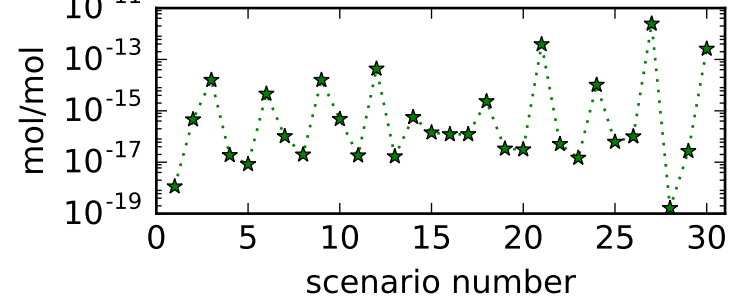

NDNPHENO2 (LIN)

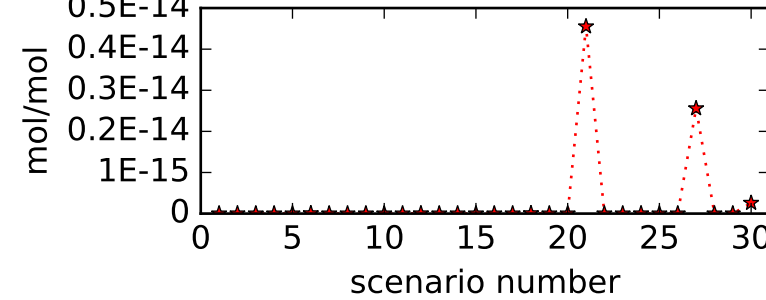

NDNPHENO2 (LOG)

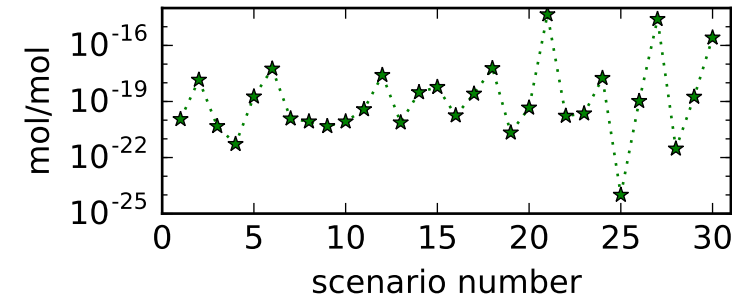

NDNPHENOOH (LIN)

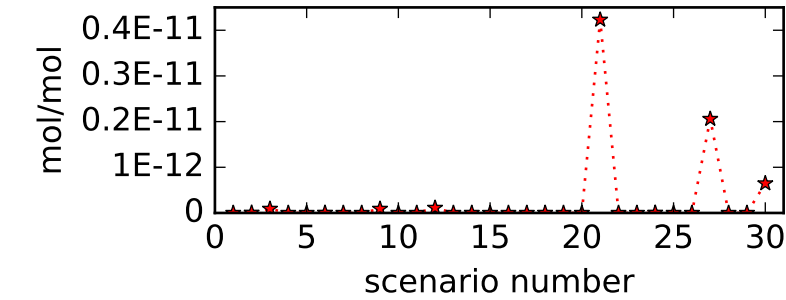

NDNPHENOOH (LOG)

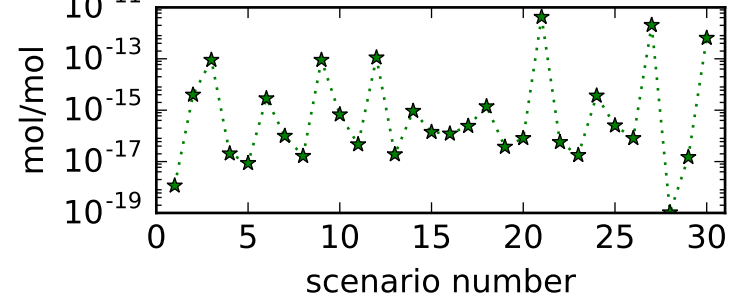

NH2 (LIN)

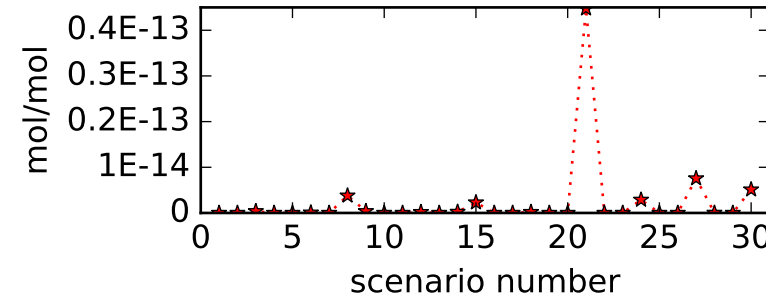

NH2 (LOG)

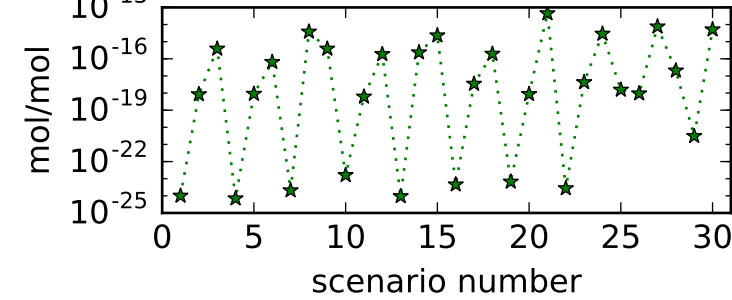

NH2O (LIN)

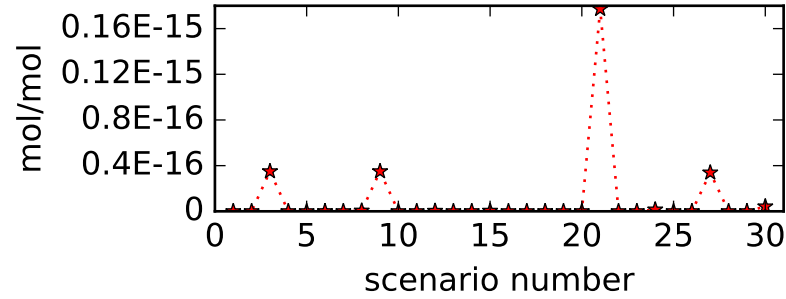

NH2O (LOG)

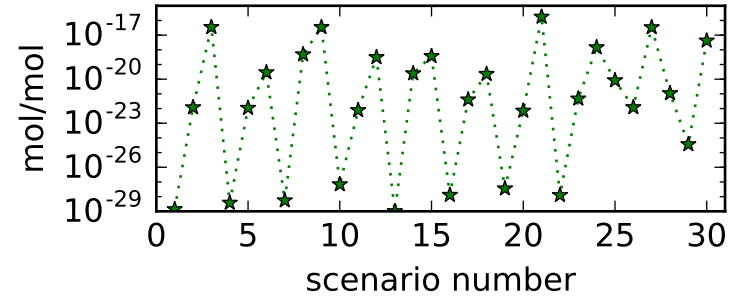

NH2OH (LIN)

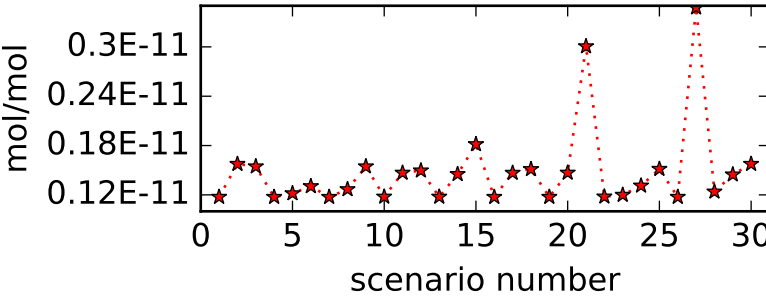

NH2OH (LOG)

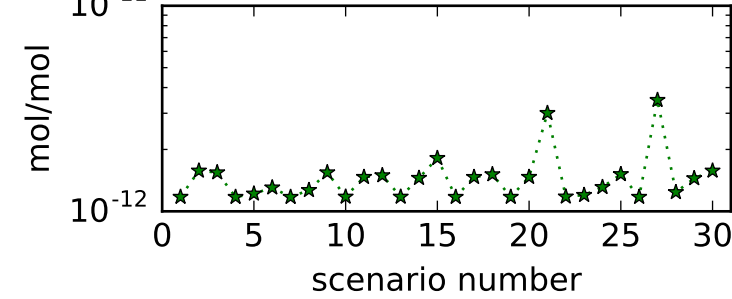

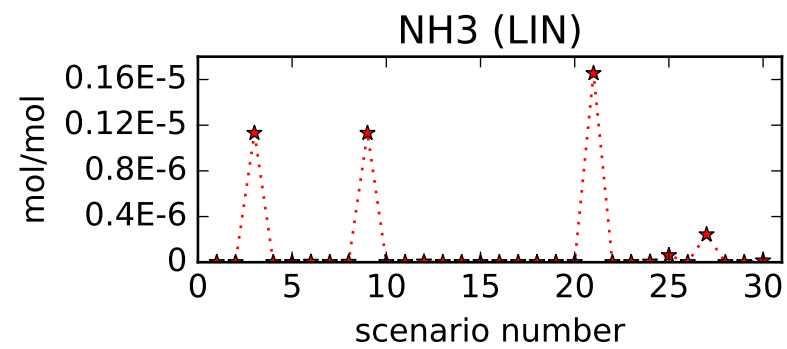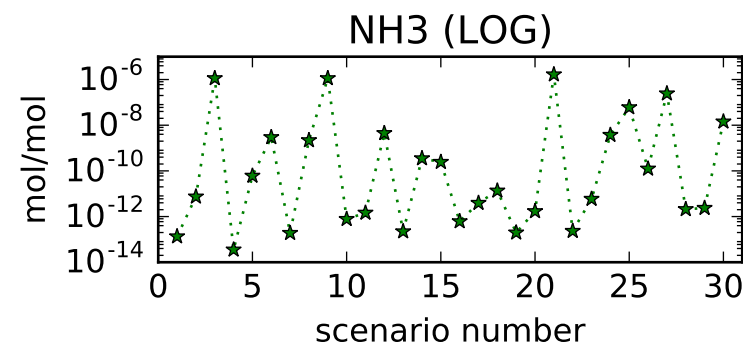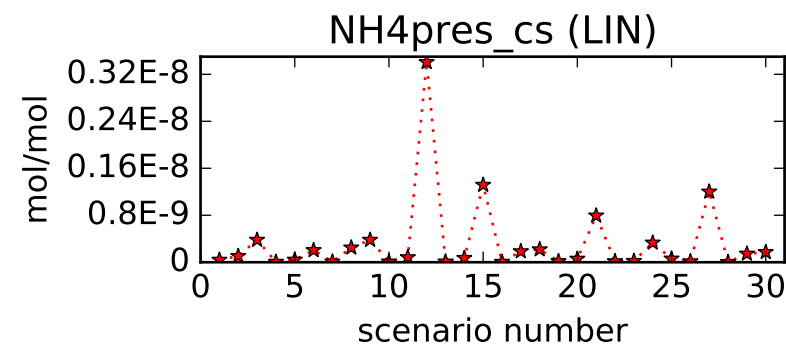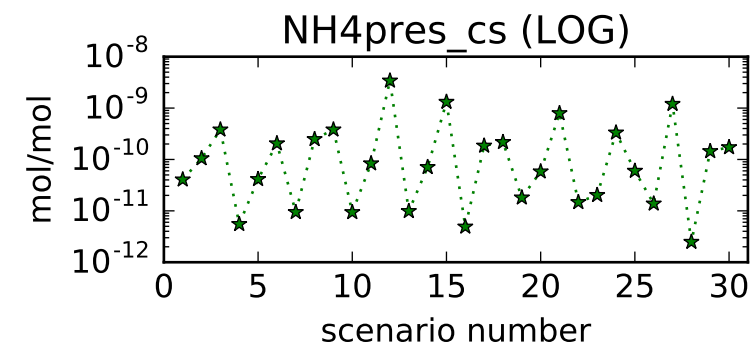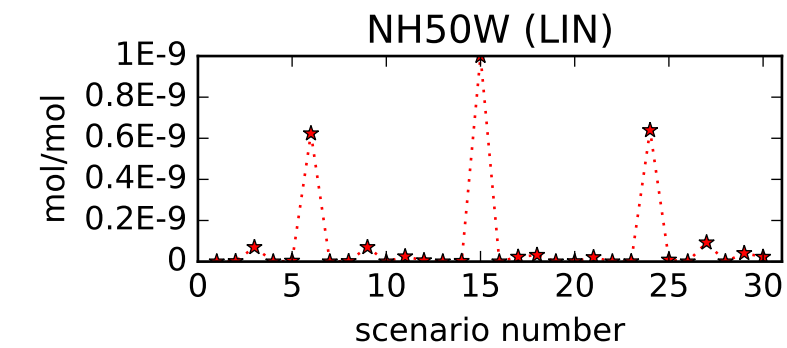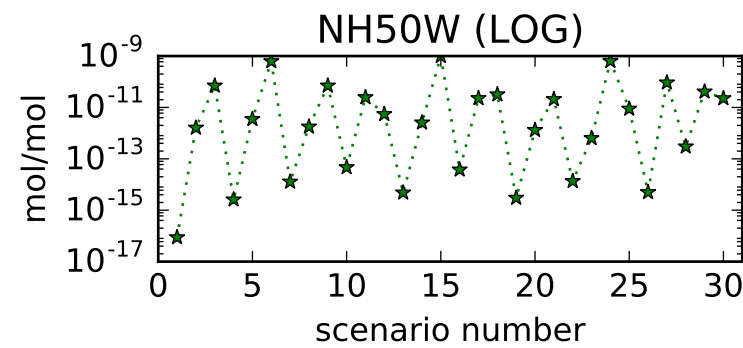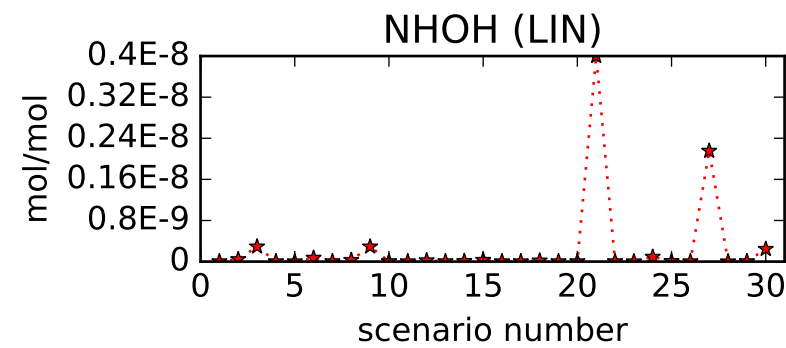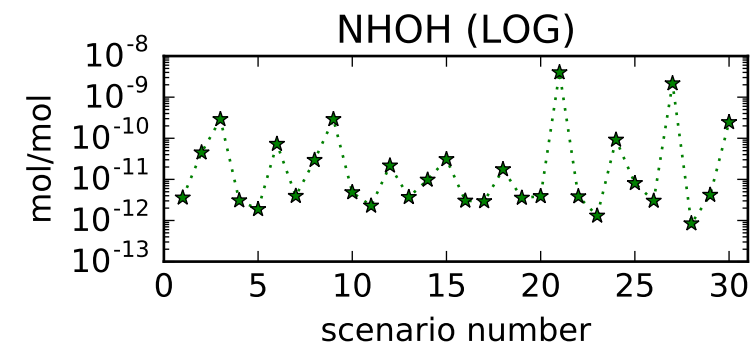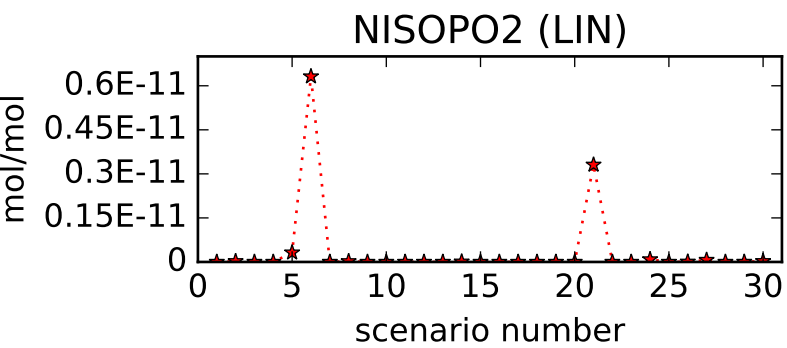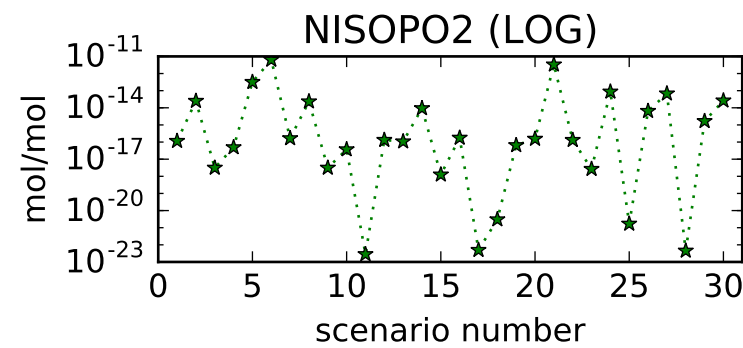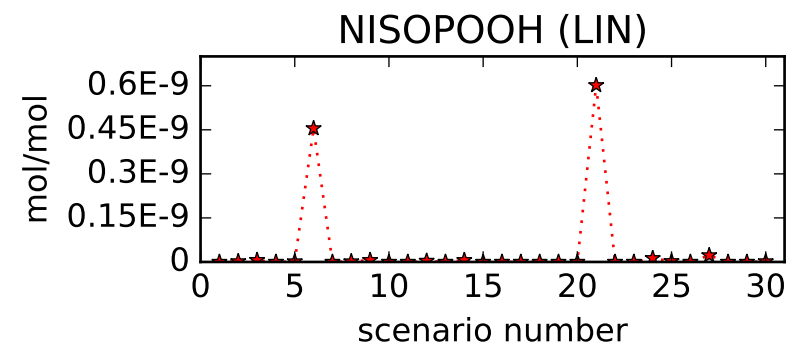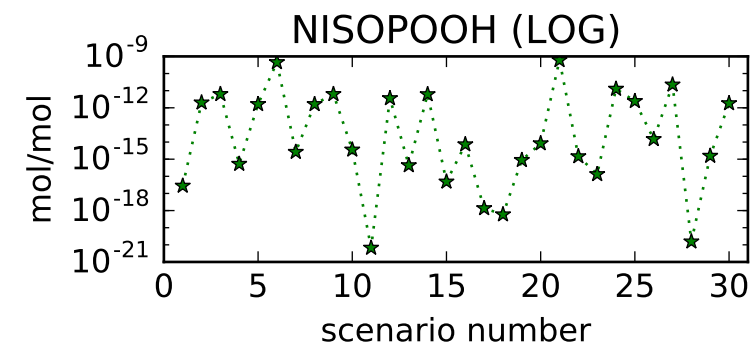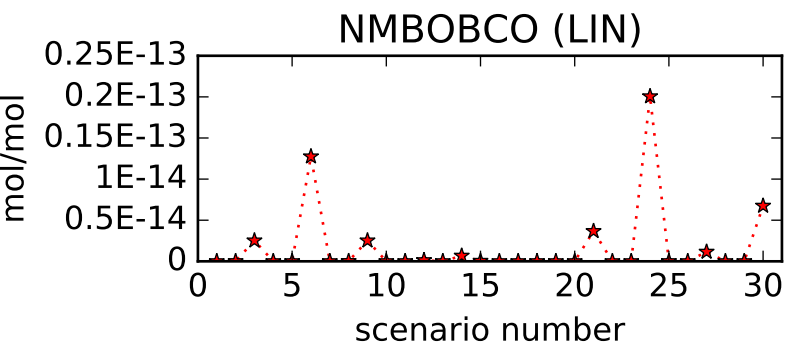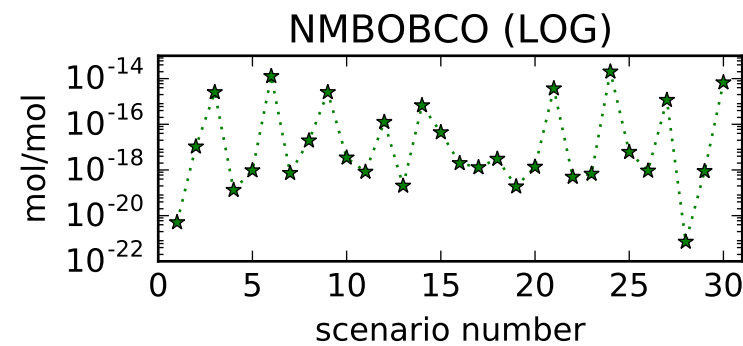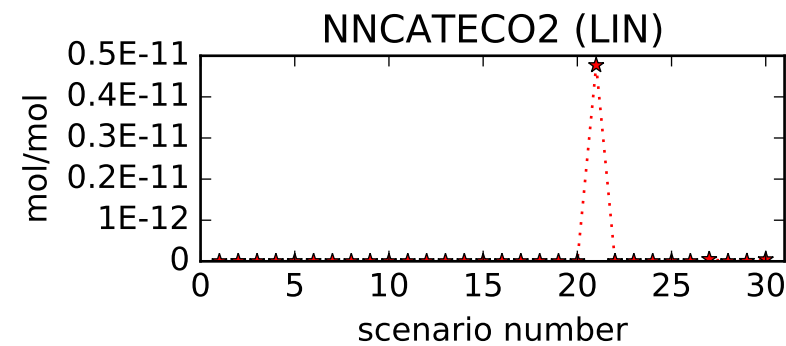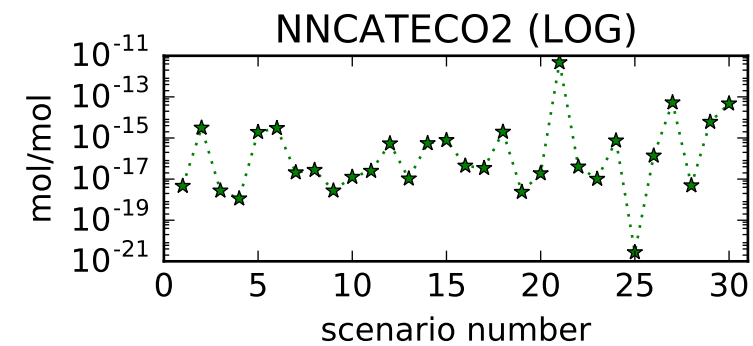

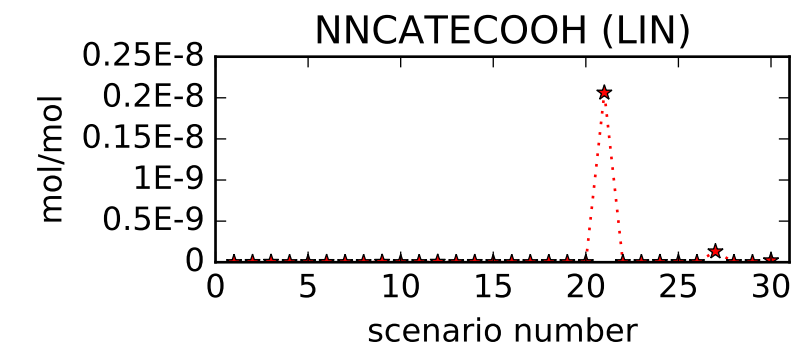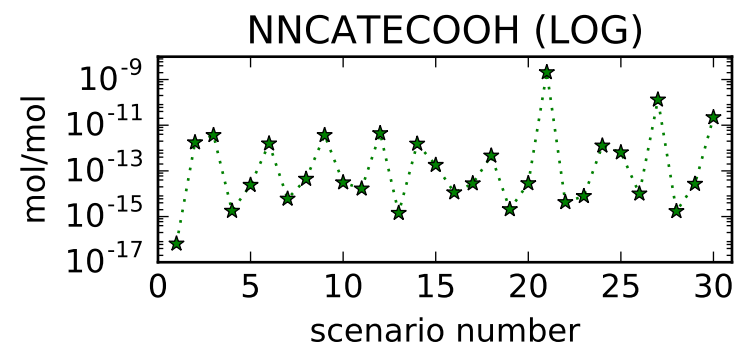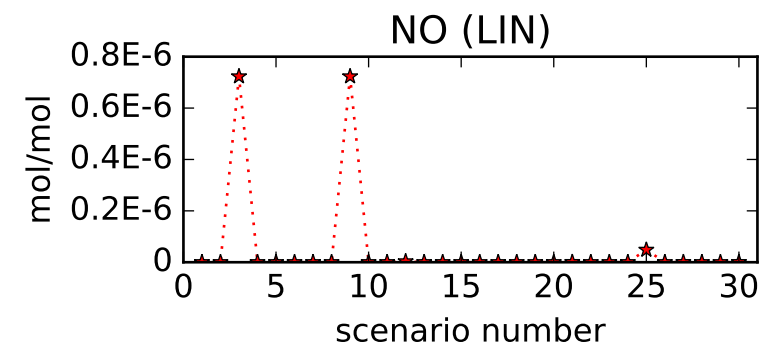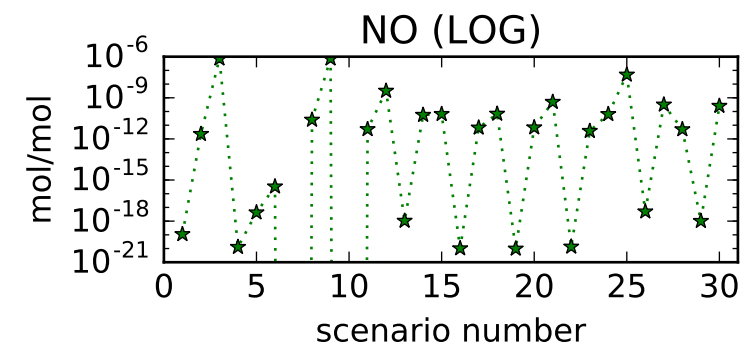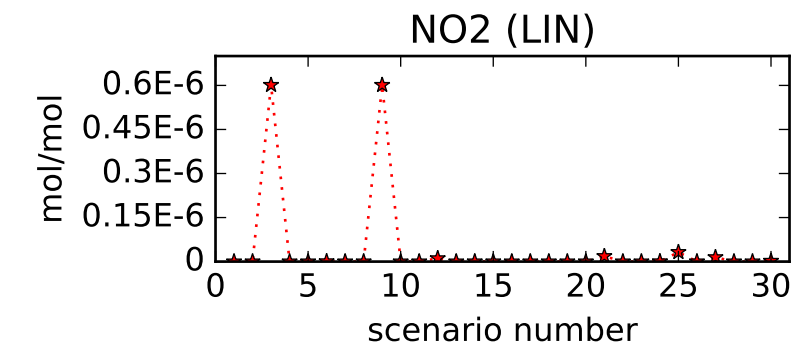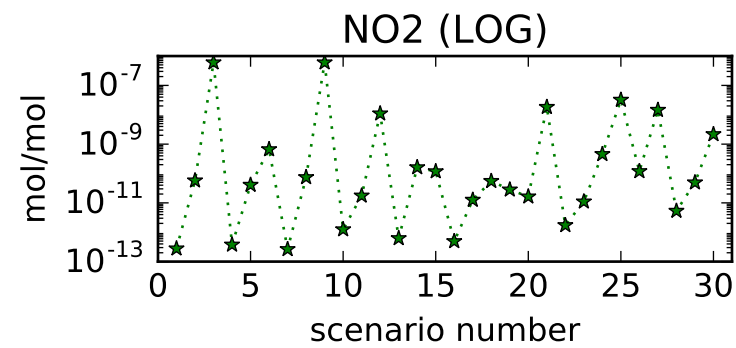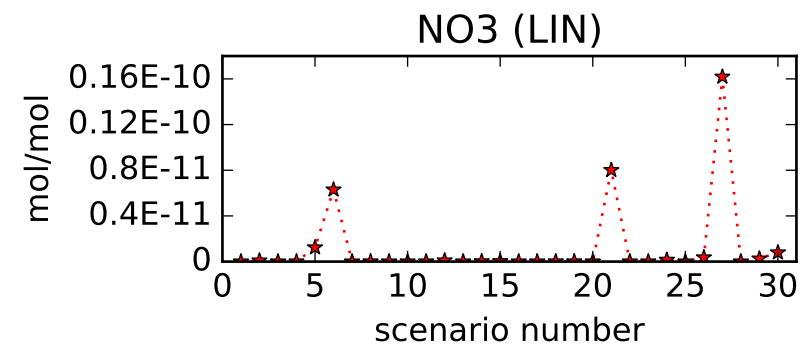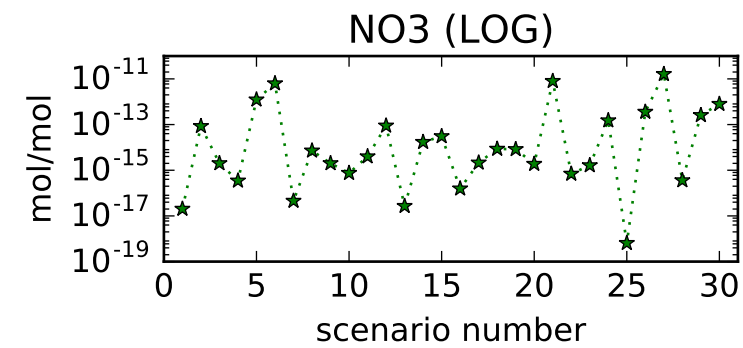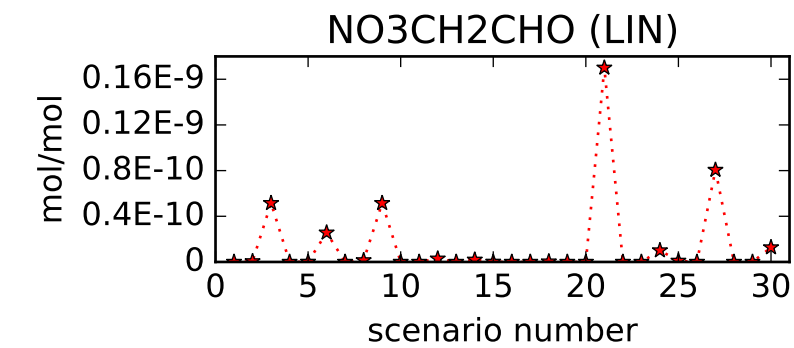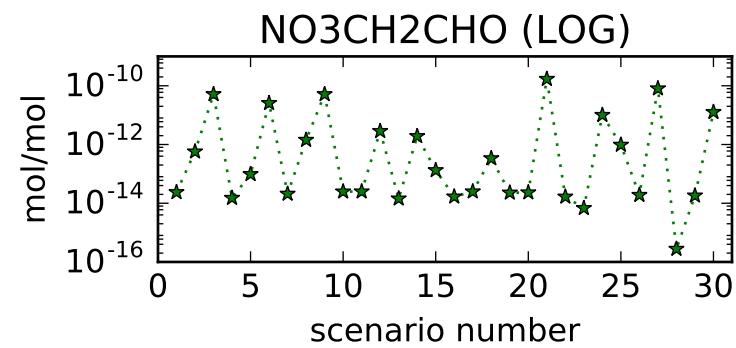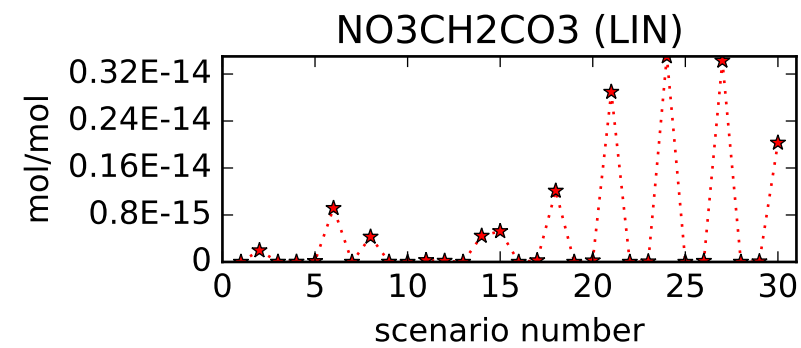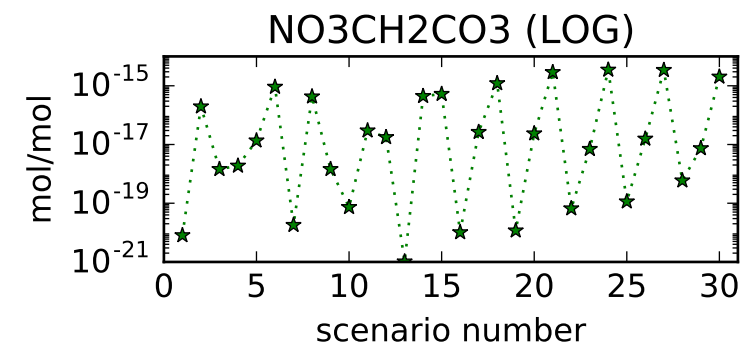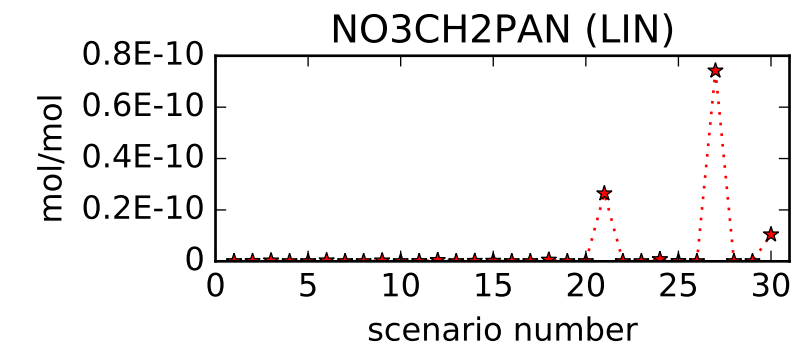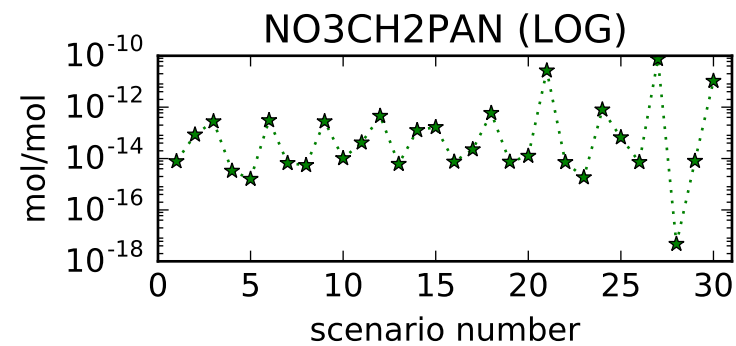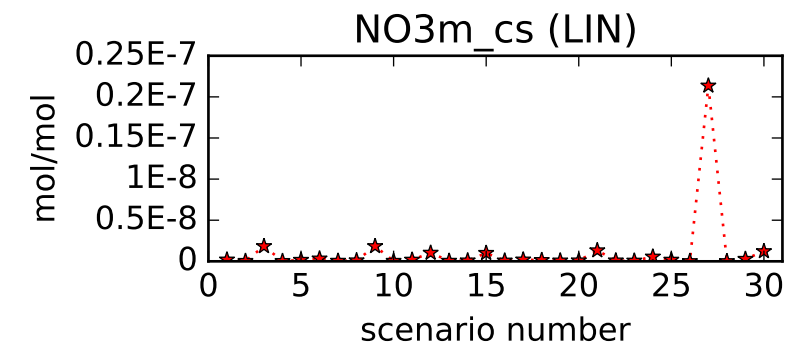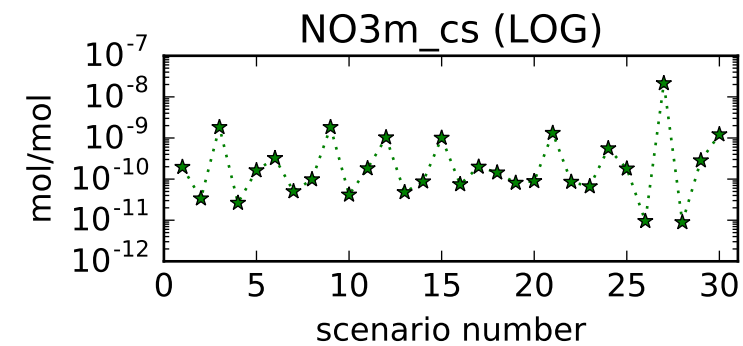

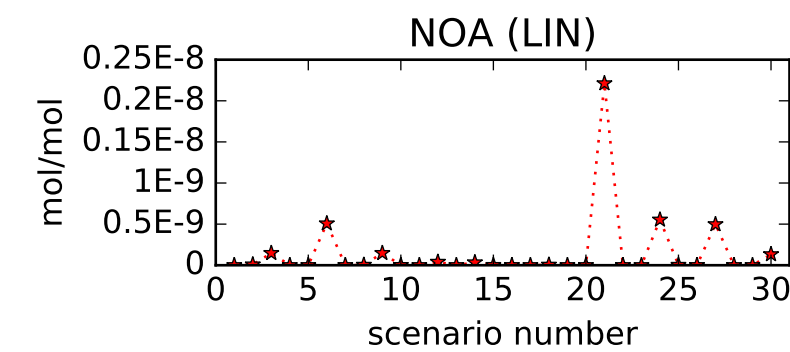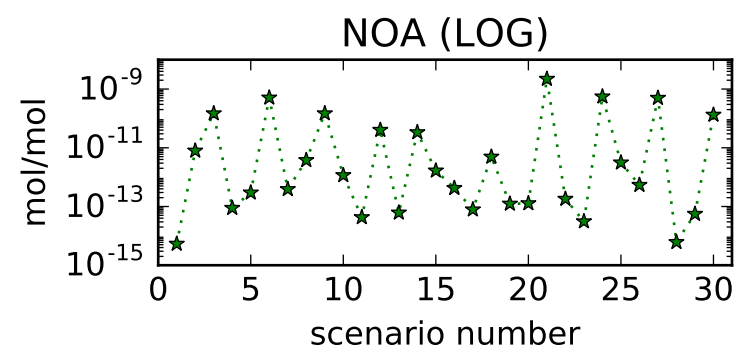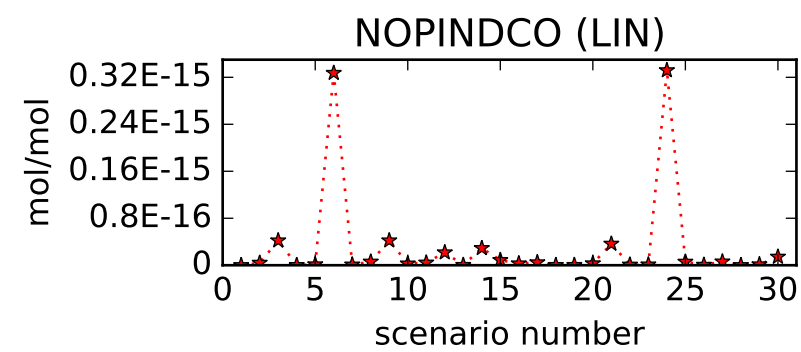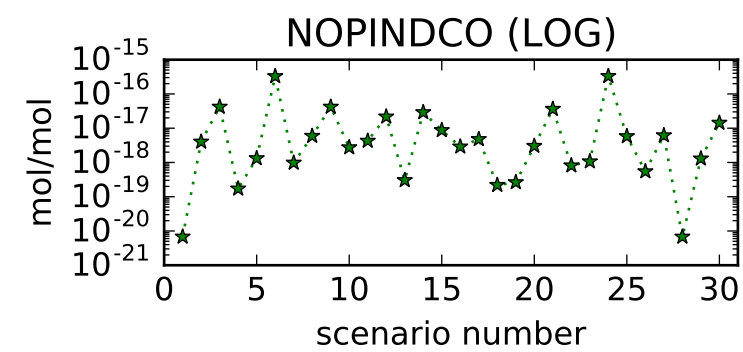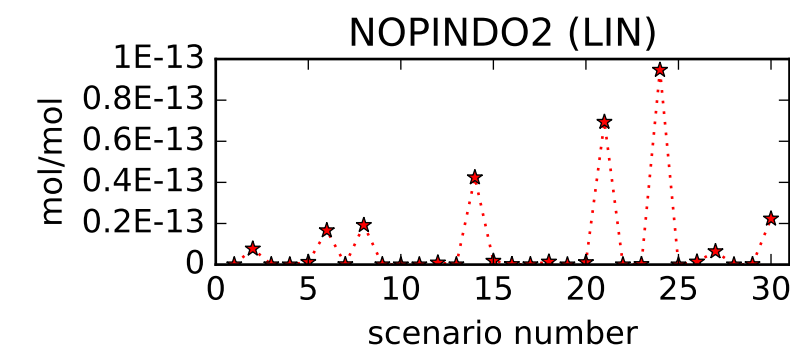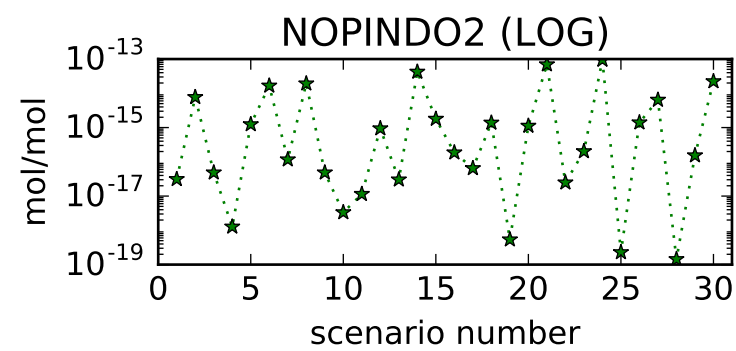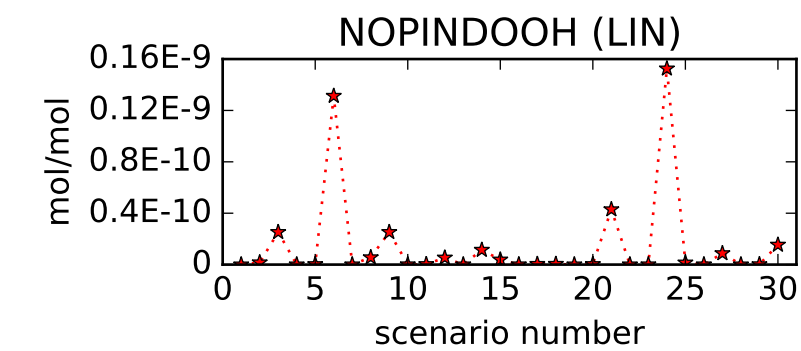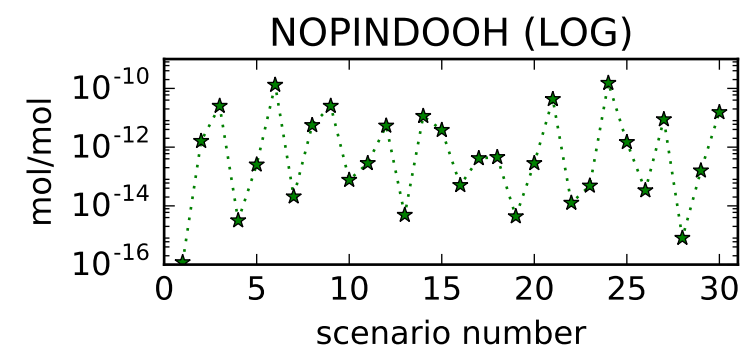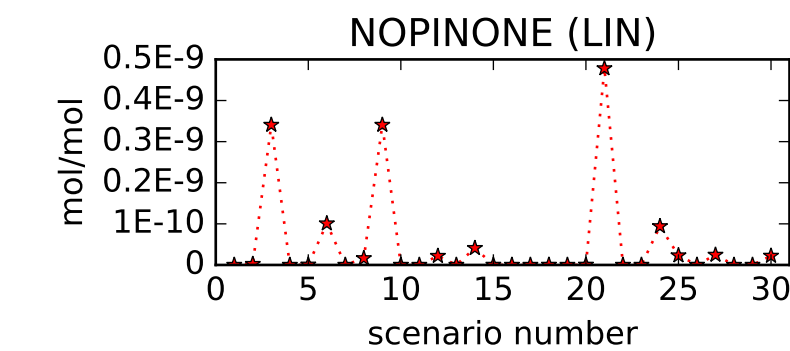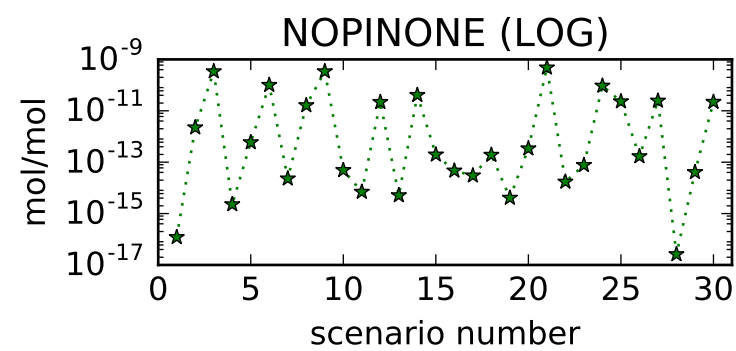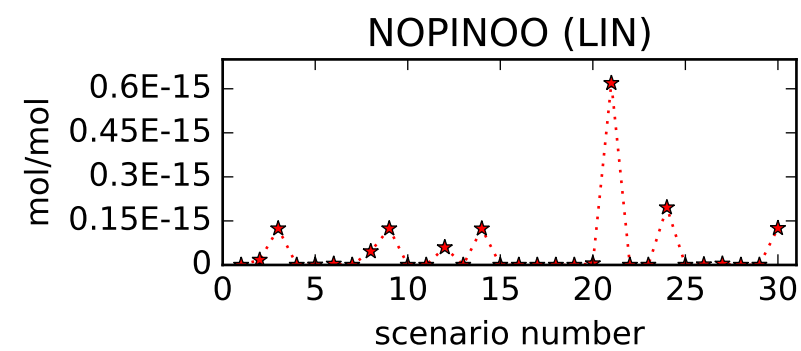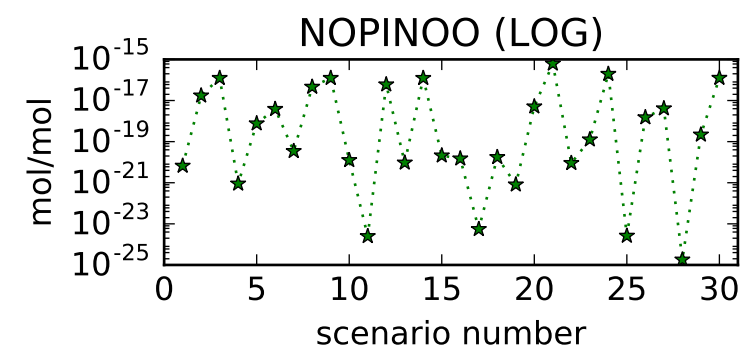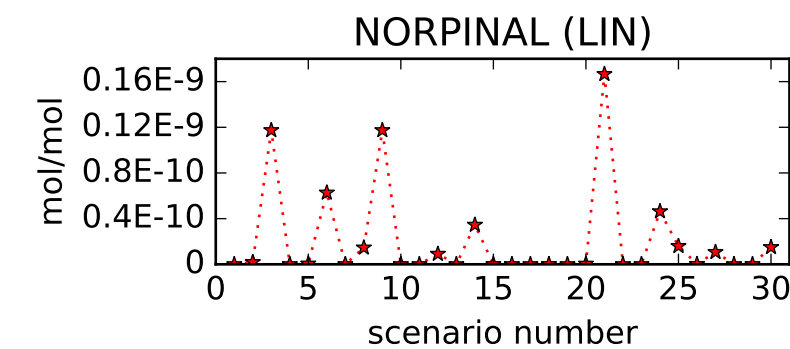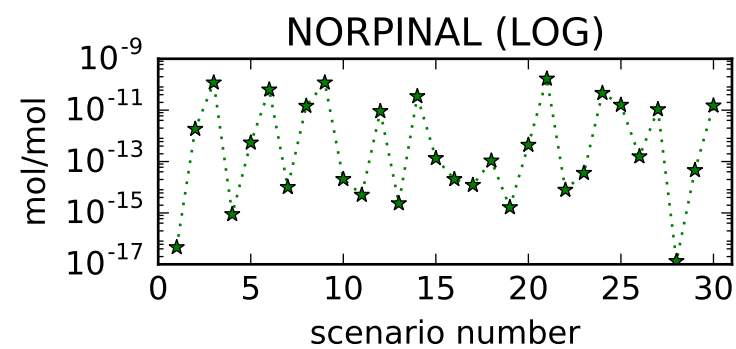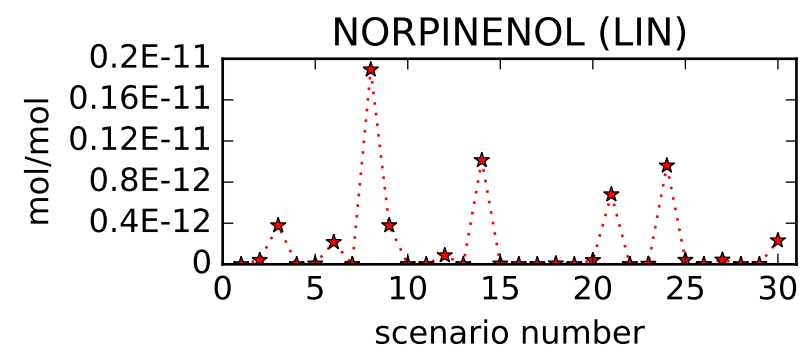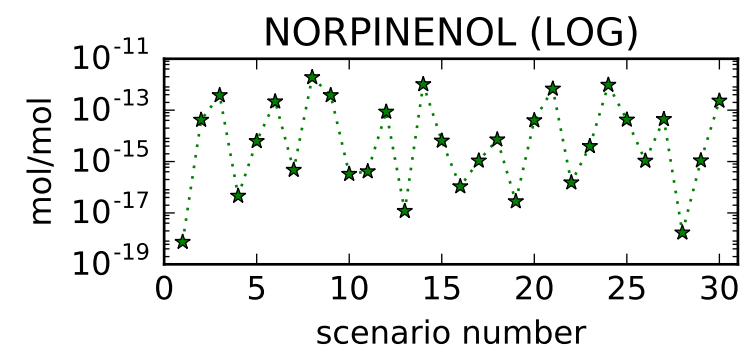

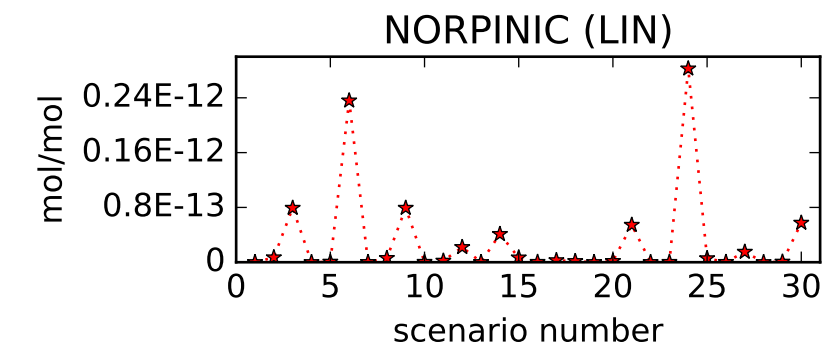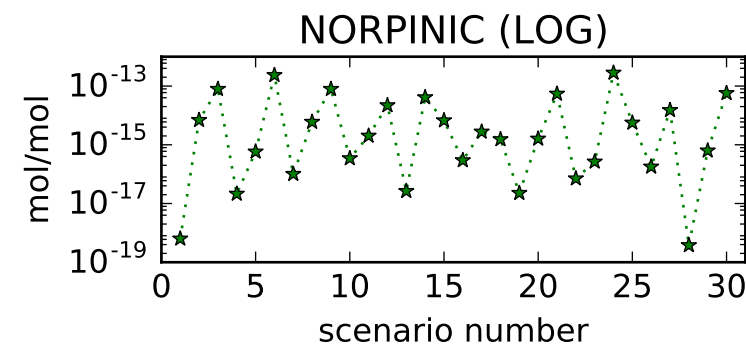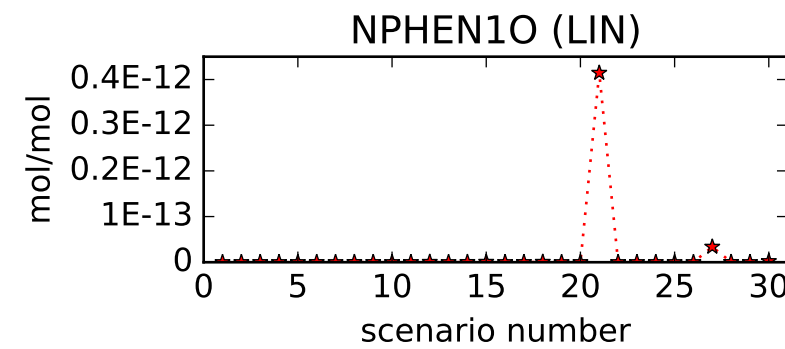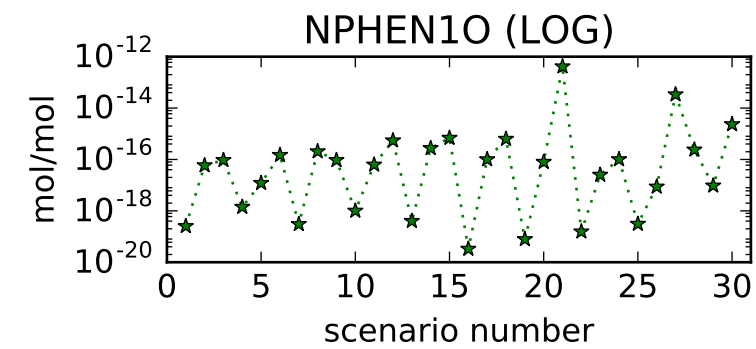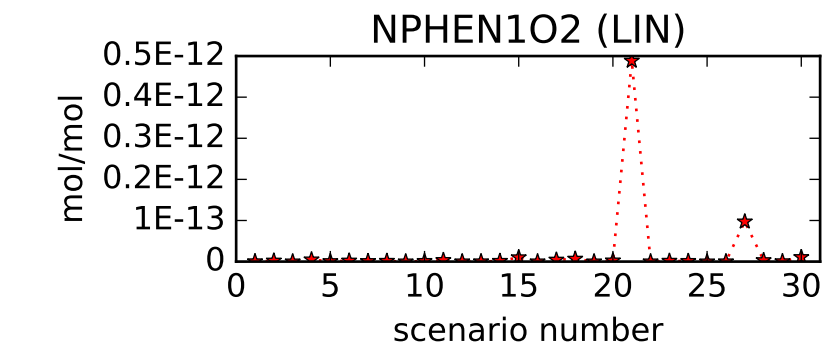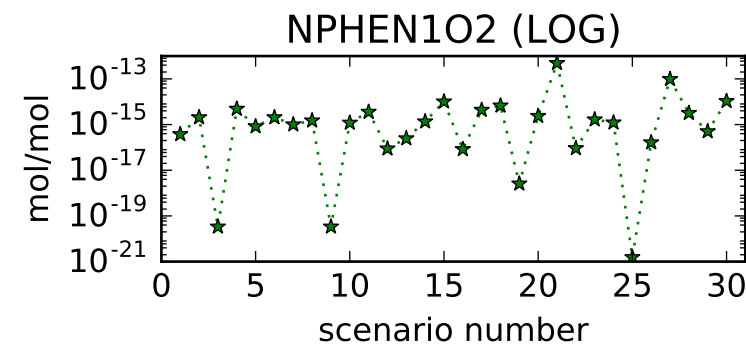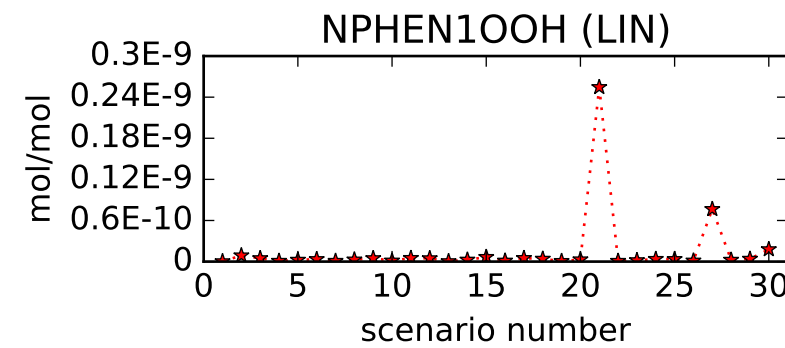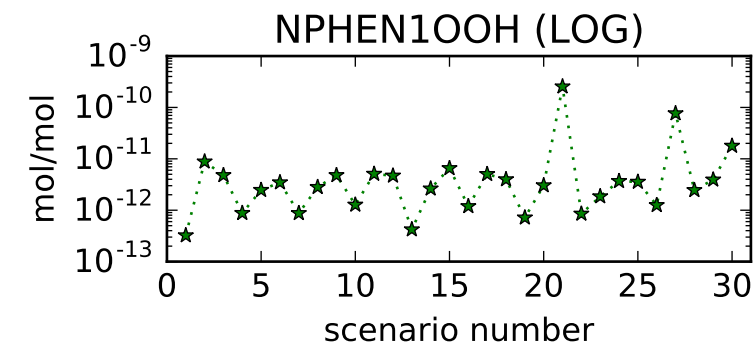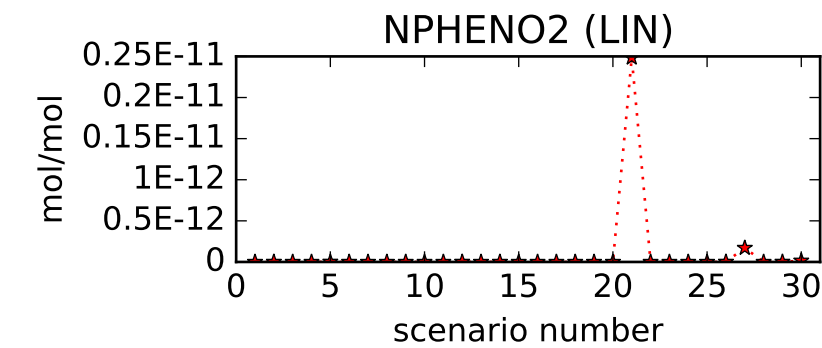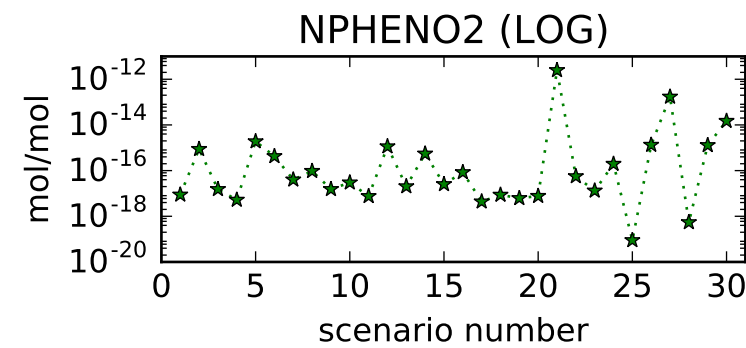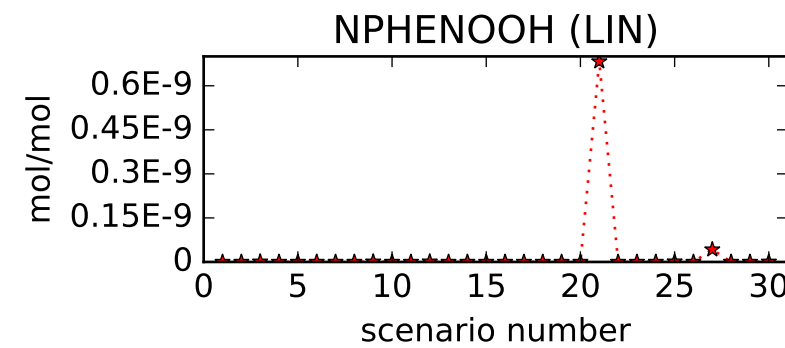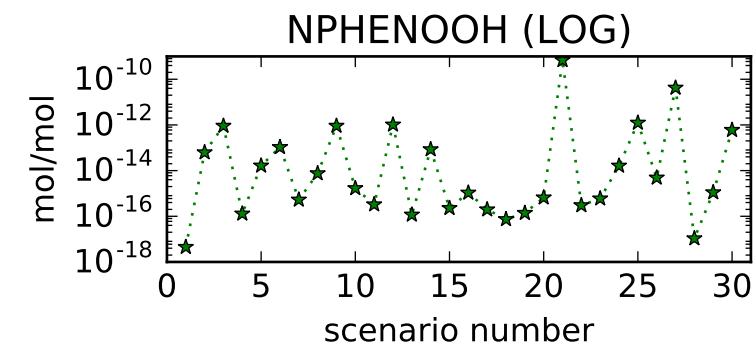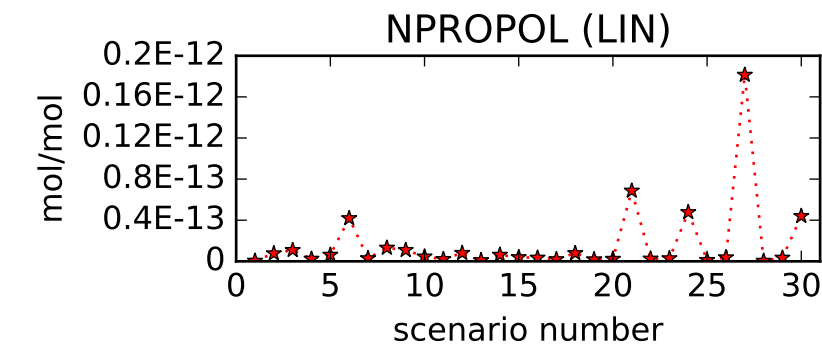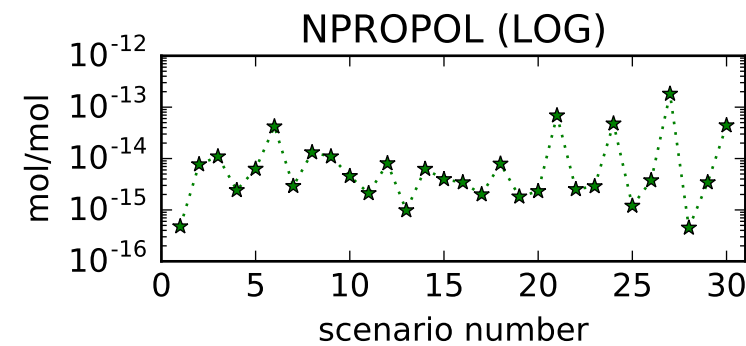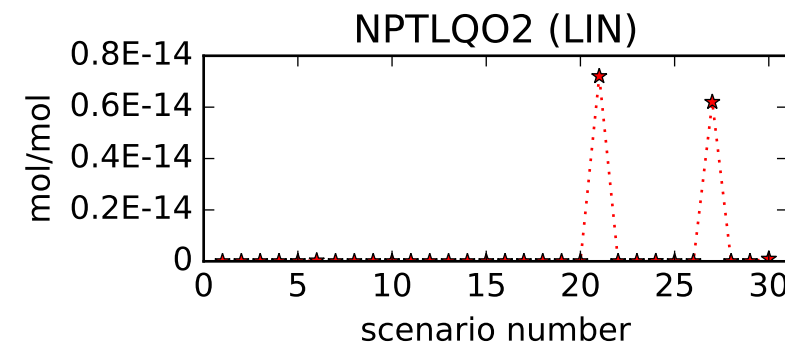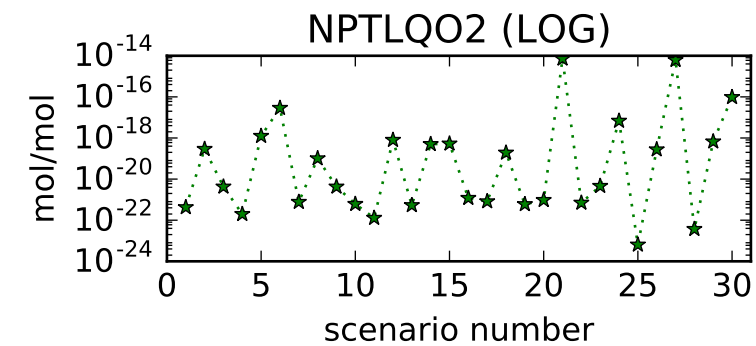



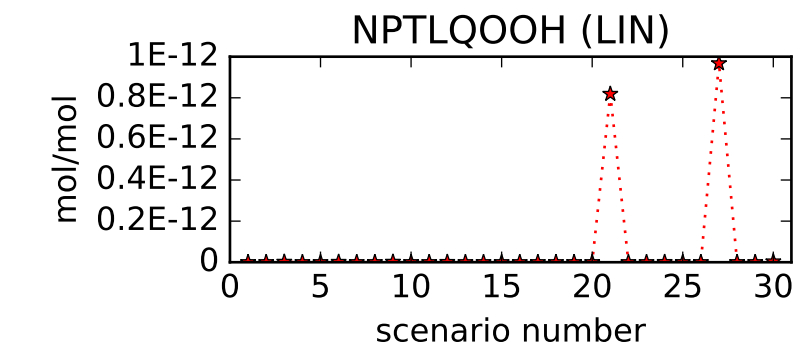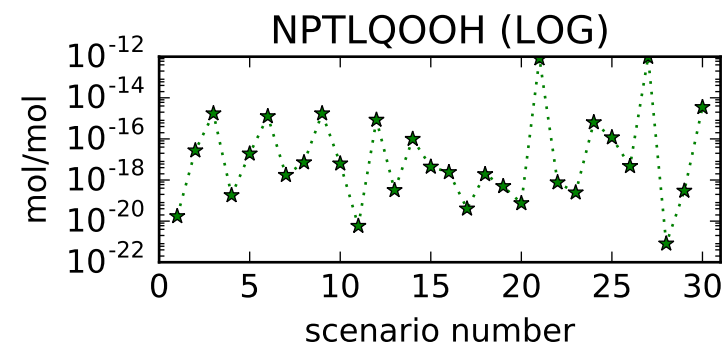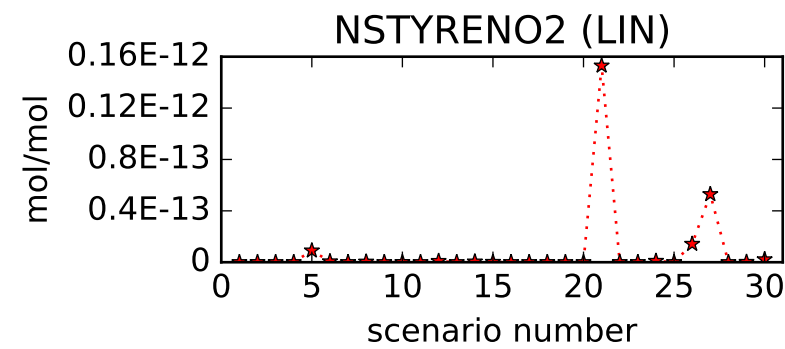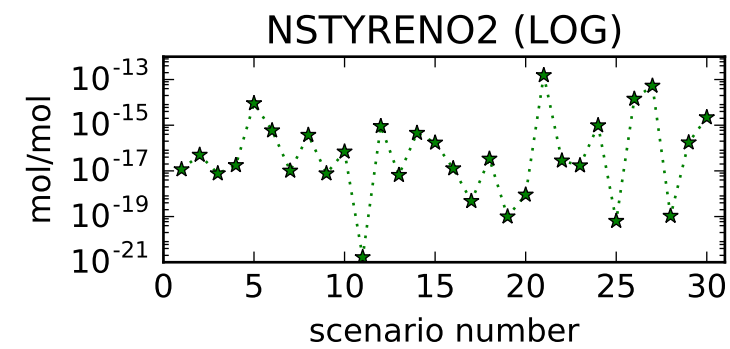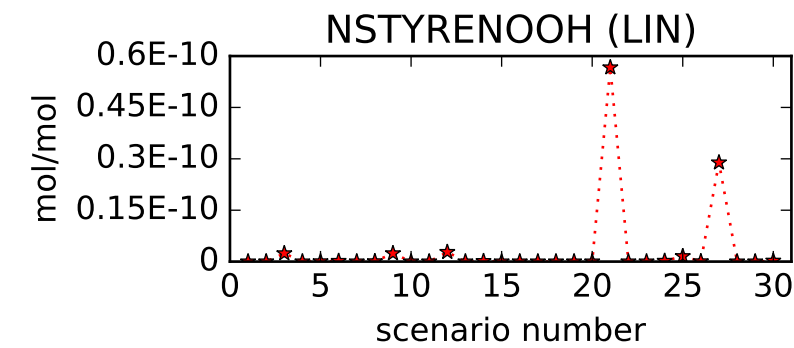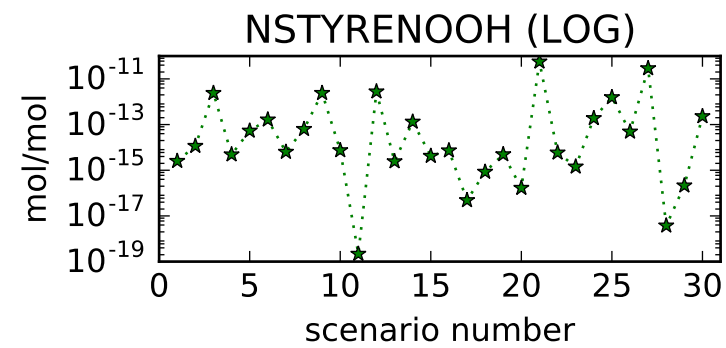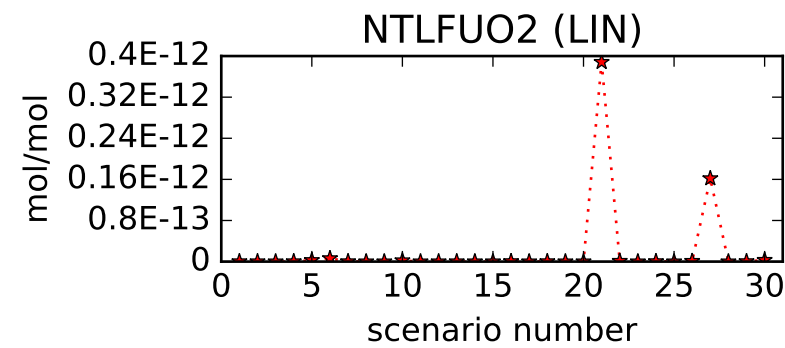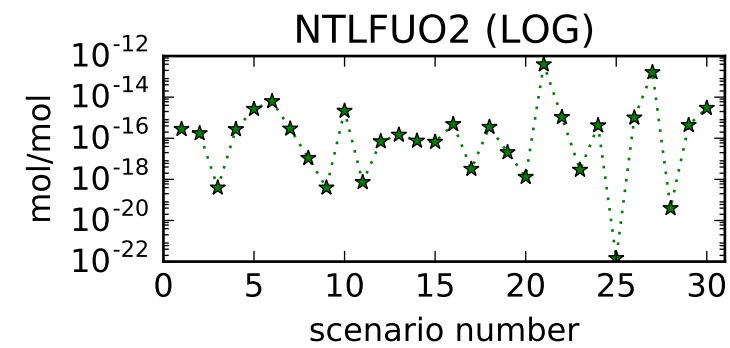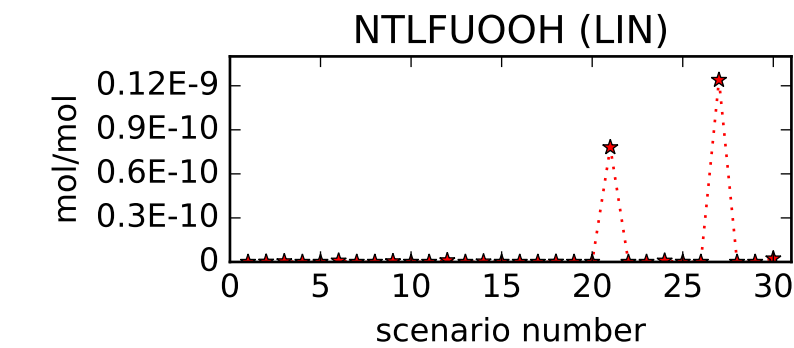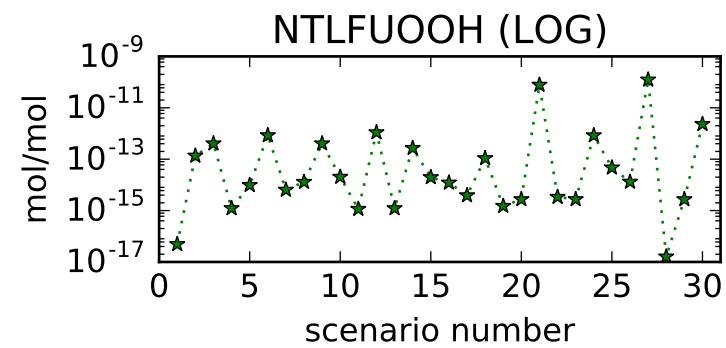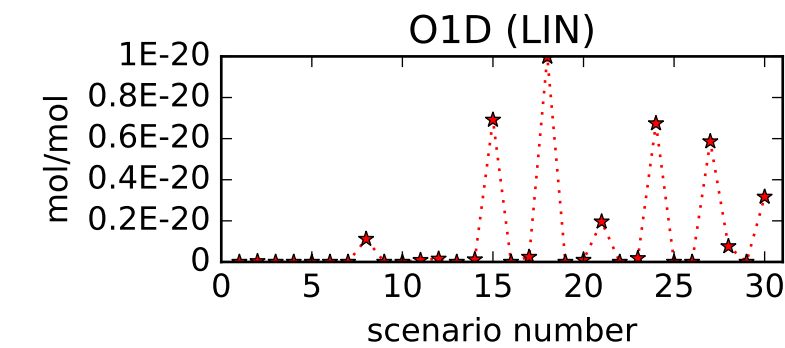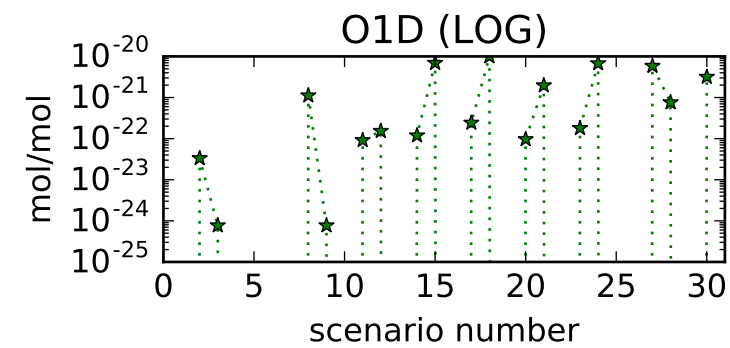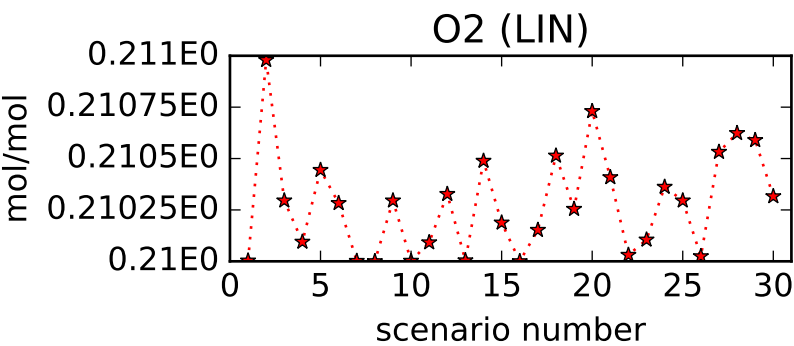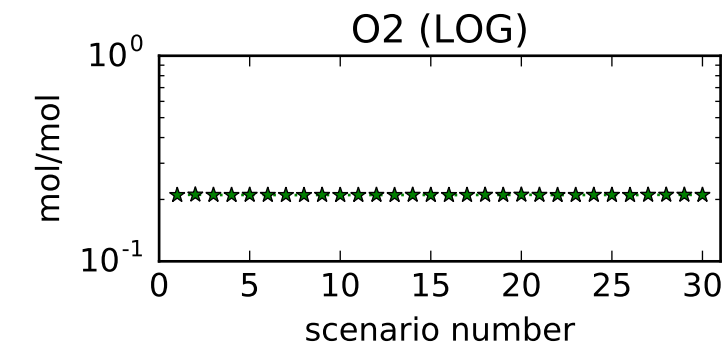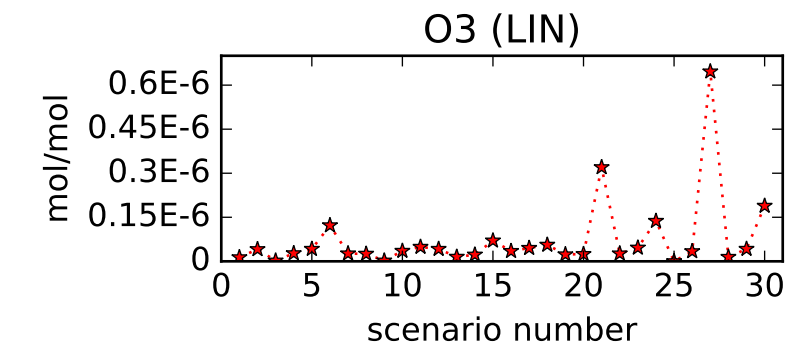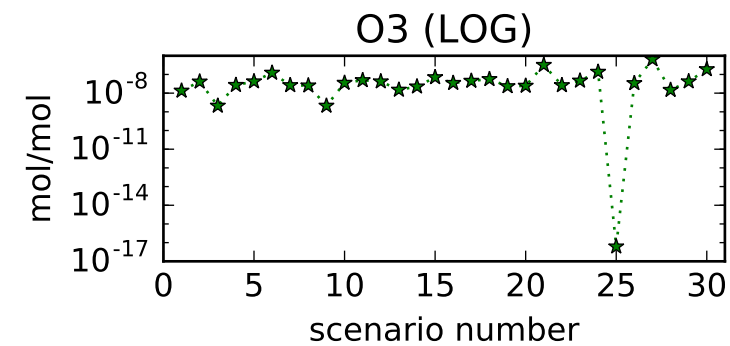

O3P (LIN)

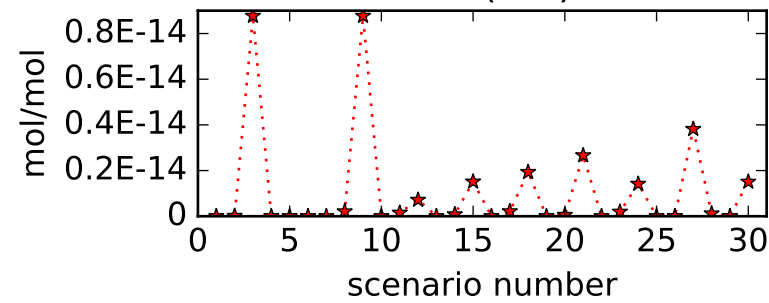

O3P (LOG)

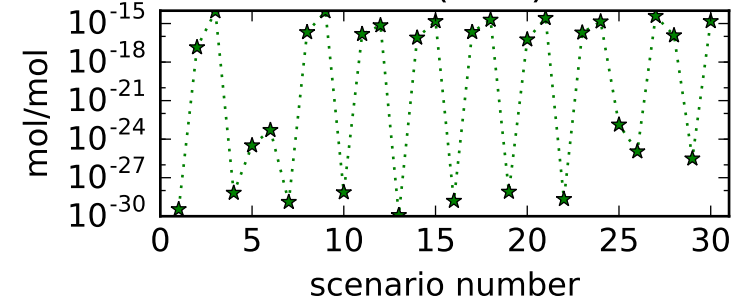

OCS (LIN)

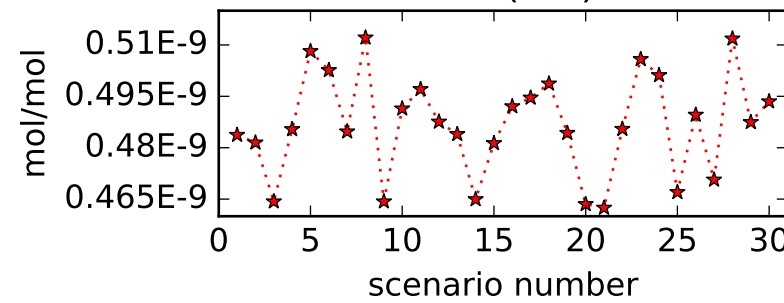

OCS (LOG)

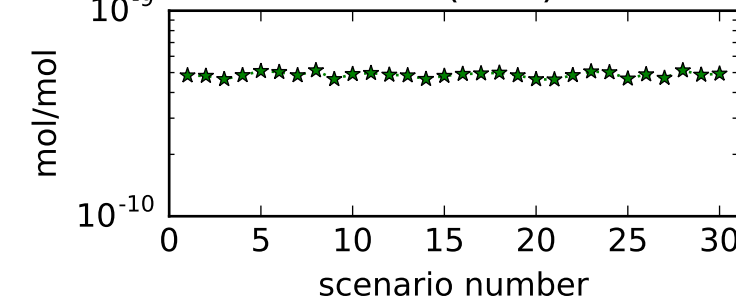

OCIO (LIN)

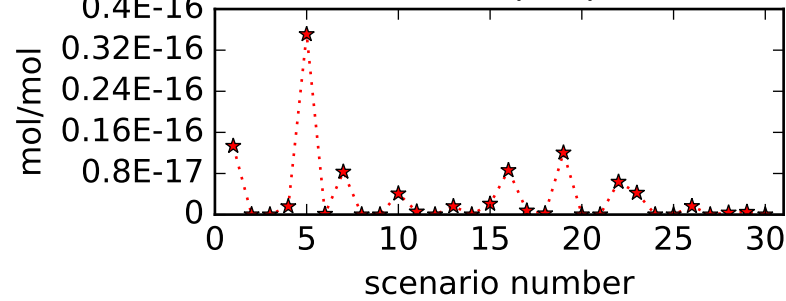

OCIO (LOG)

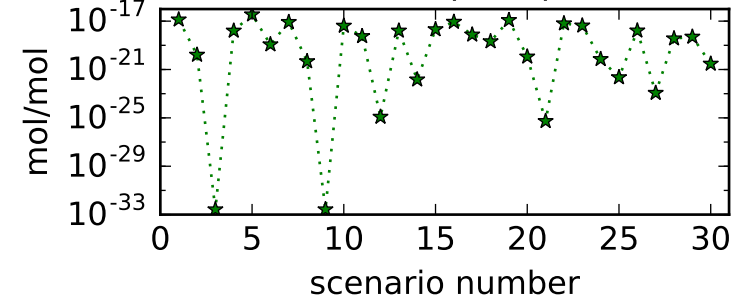

OH (LIN)

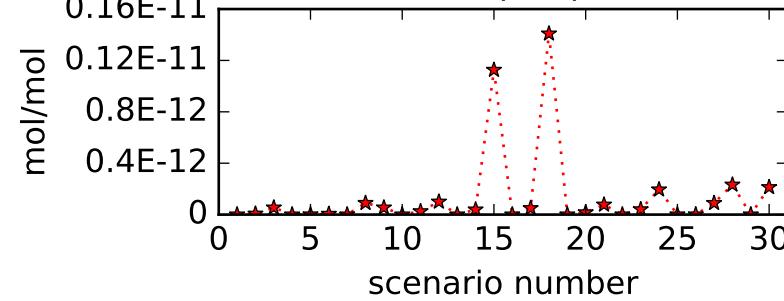

OH (LOG)

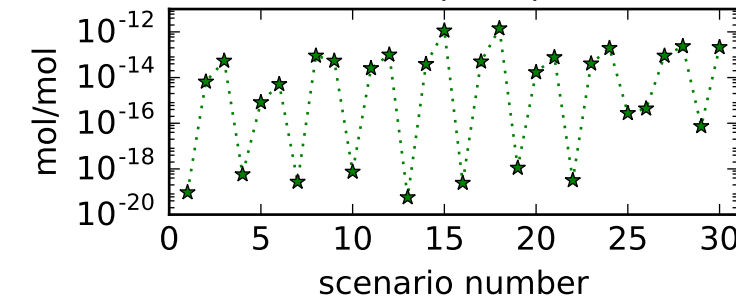

OH2MENTHEN6ONE (LIN)

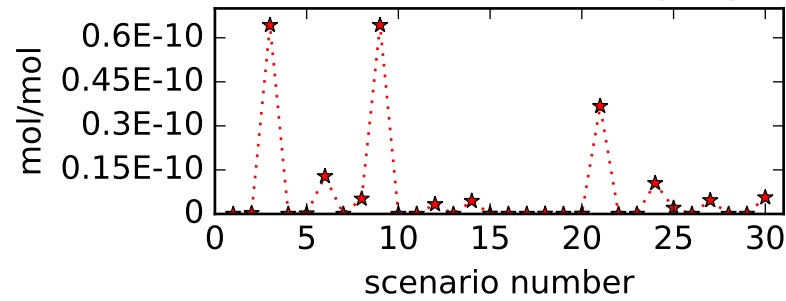

OH2MENTHEN6ONE (LOG)

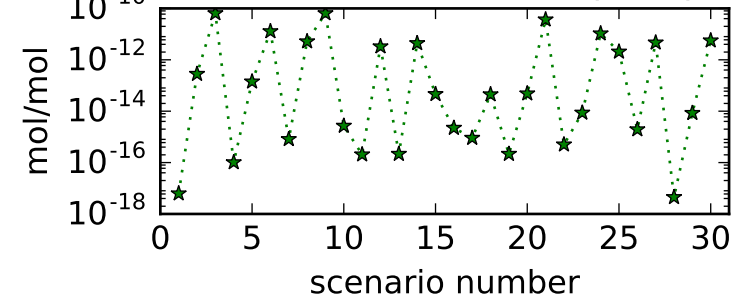

OHMENTHEN6ONEO2 (LIN)

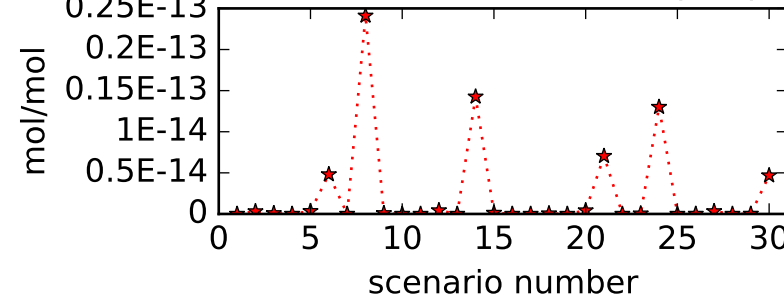

OHMENTHEN6ONEO2 (LOG)

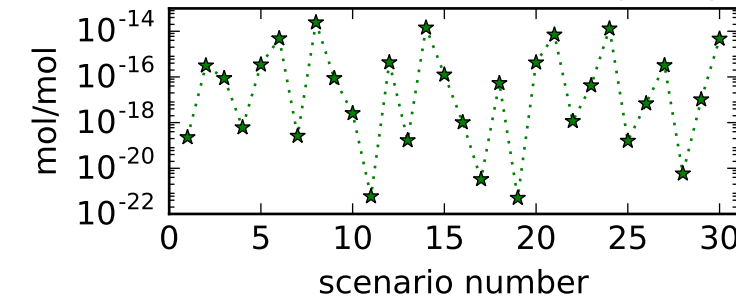

OXYL1O2 (LIN)

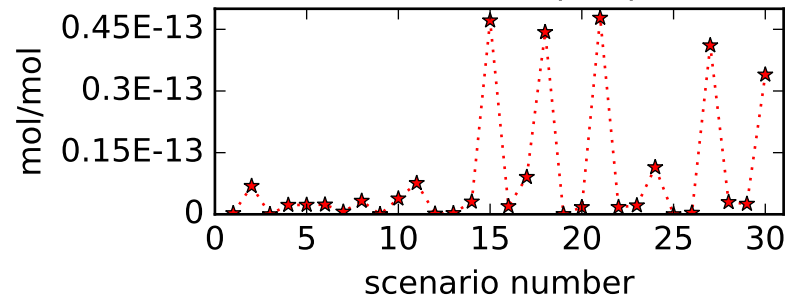

OXYL1O2 (LOG)

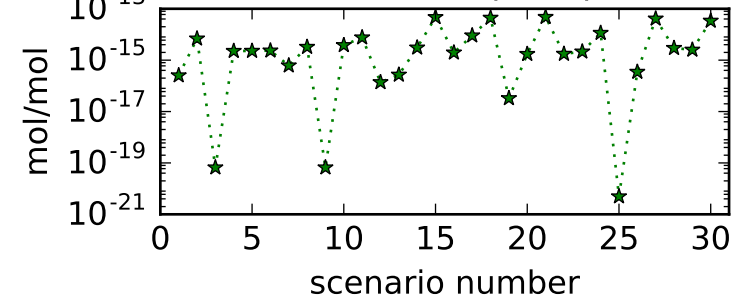

OXYL1OOH (LIN)

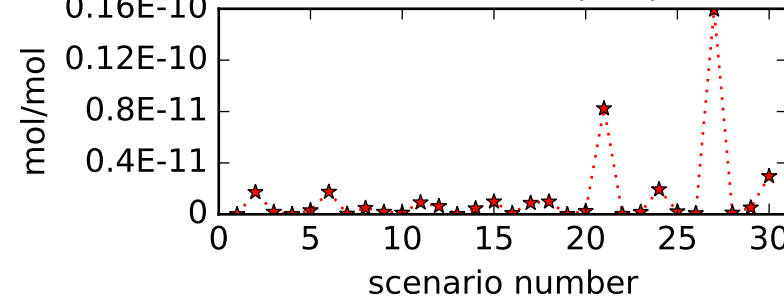

OXYL1OOH (LOG)

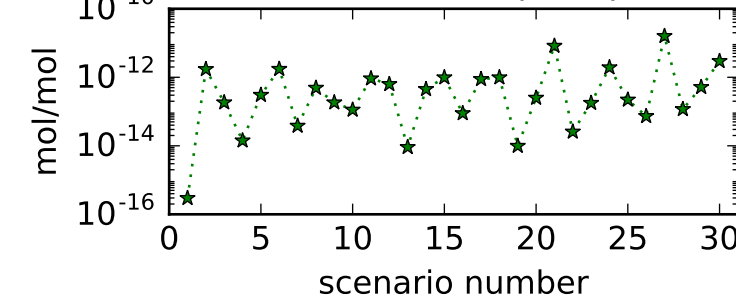

PAN (LIN)

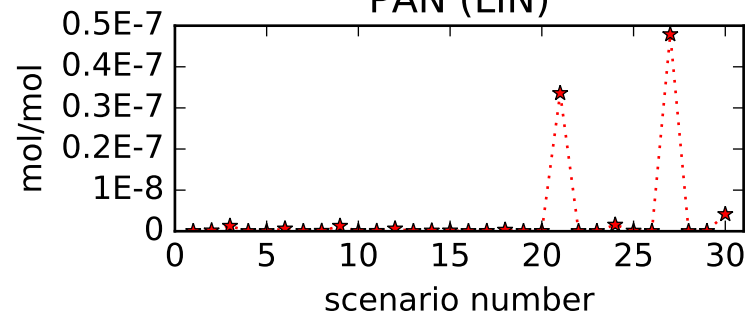

PAN (LOG)

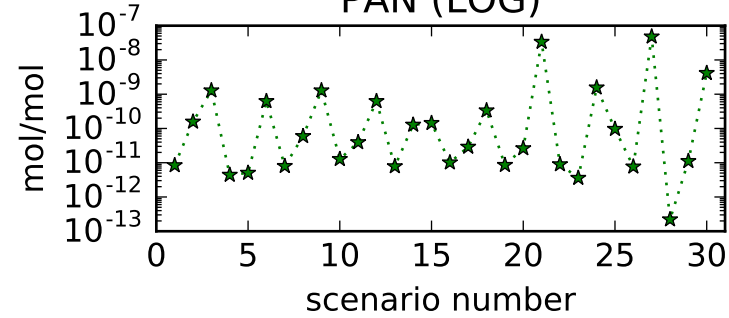

PBZN (LIN)

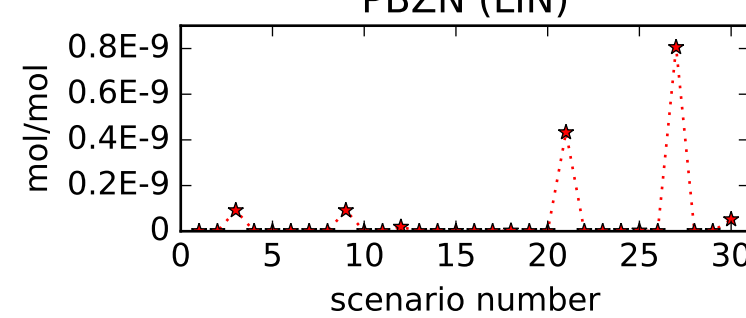

PBZN (LOG)

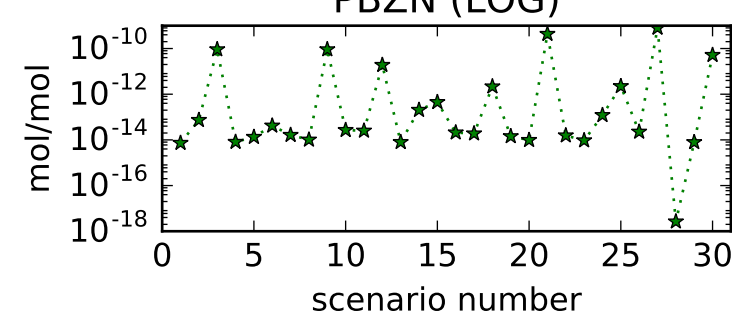

PBZQCO (LIN)

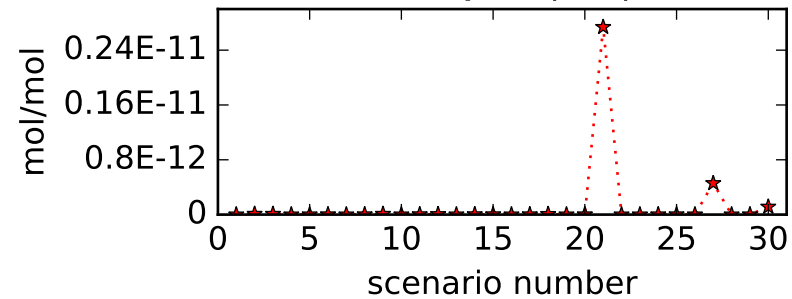

PBZQCO (LOG)

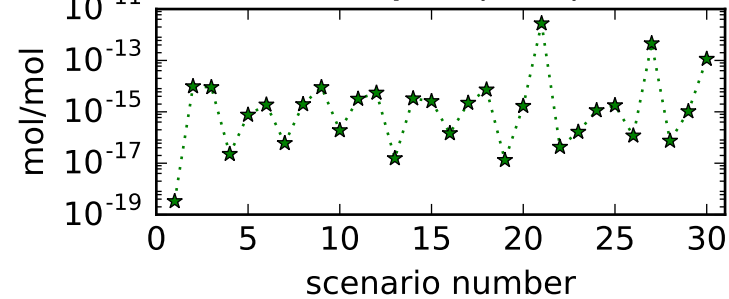

PBZQO2 (LIN)

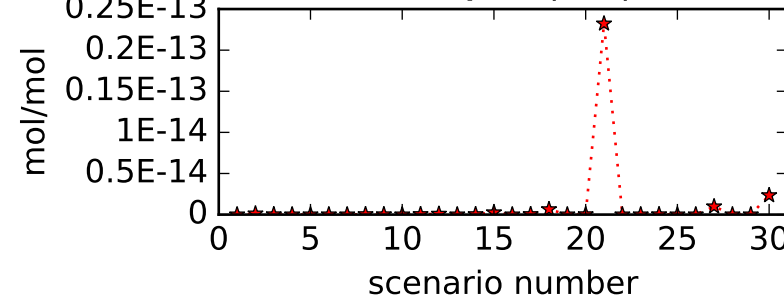

PBZQO2 (LOG)

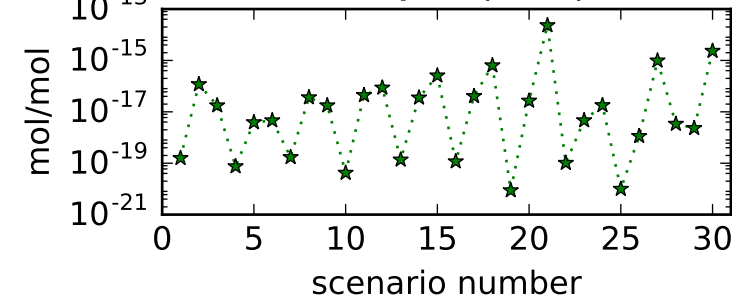

PBZQONE (LIN)

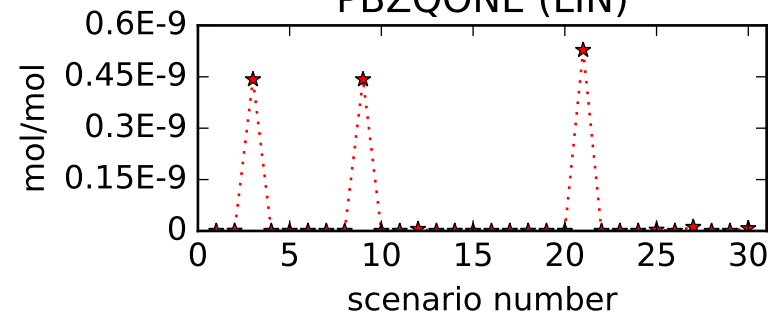

PBZQONE (LOG)

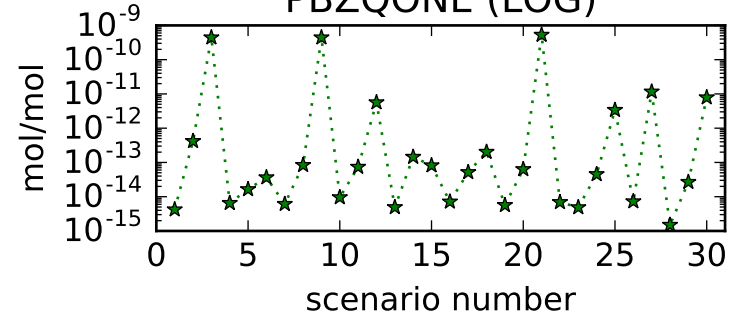

PBZQOOH (LIN)

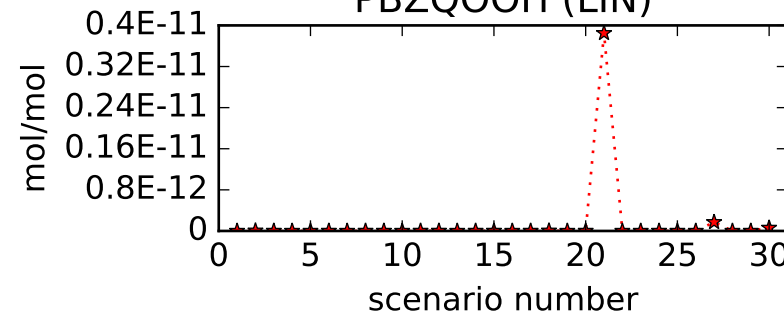

PBZQOOH (LOG)

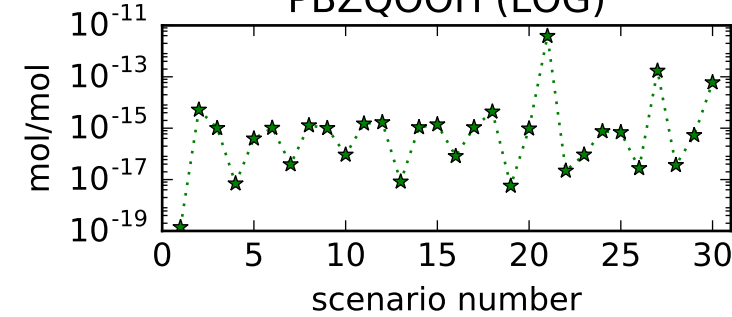

PERIBUACID (LIN)

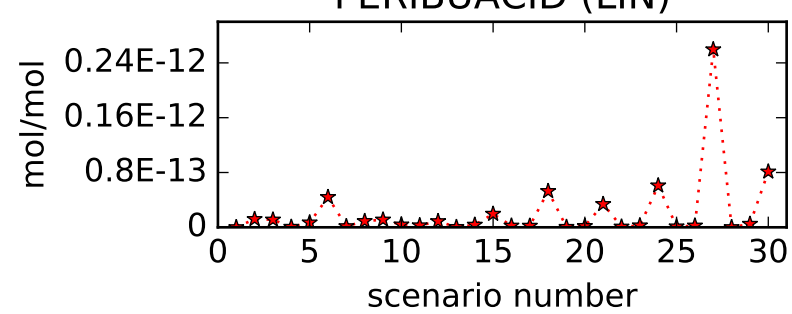

PERIBUACID (LOG)

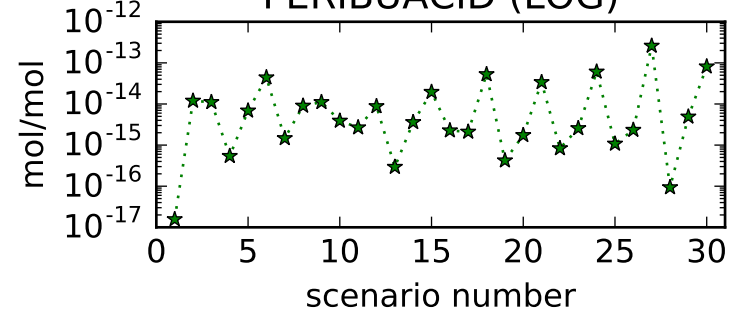

PERPINONIC (LIN)

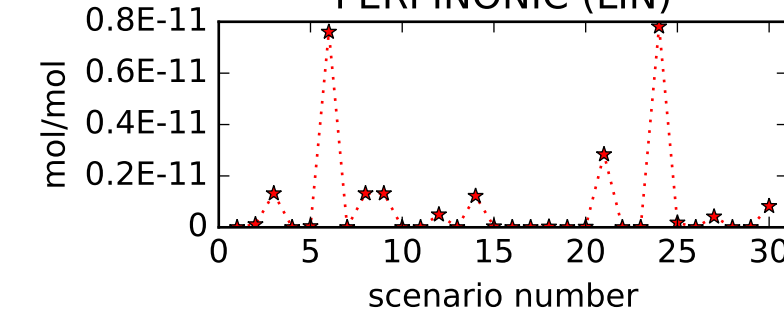

PERPINONIC (LOG)

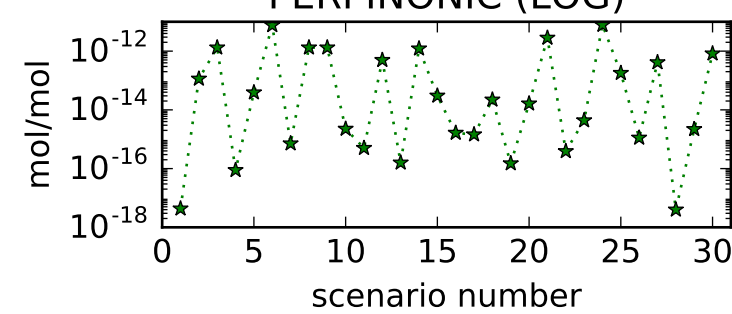

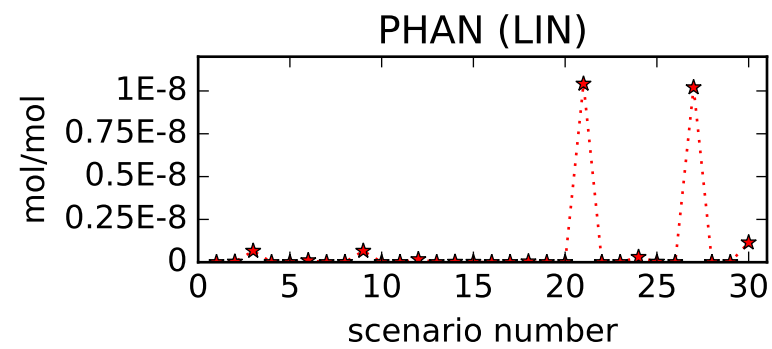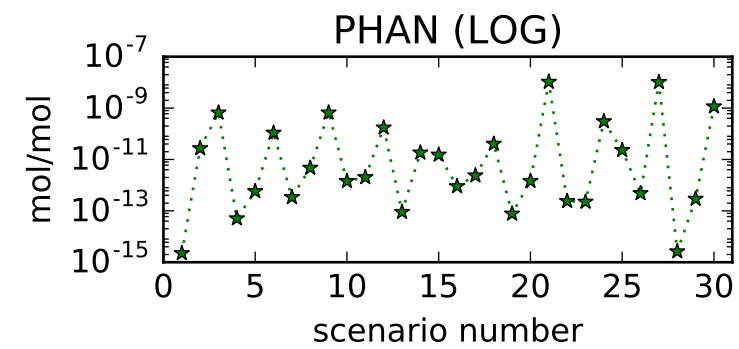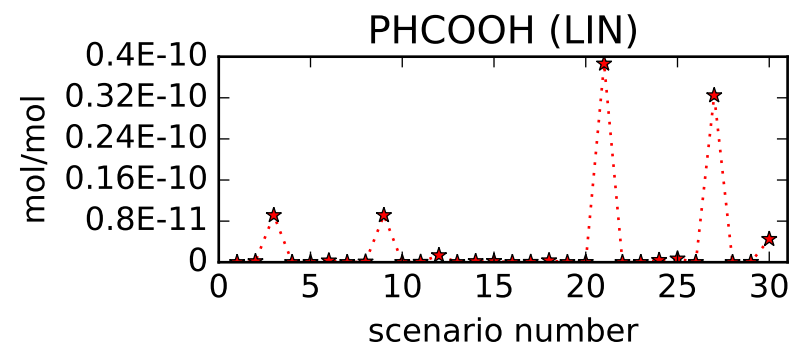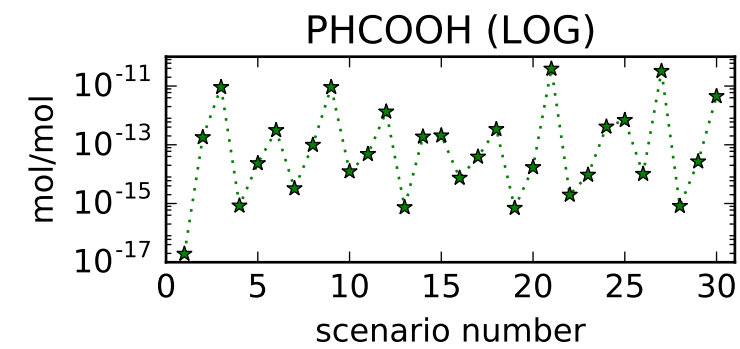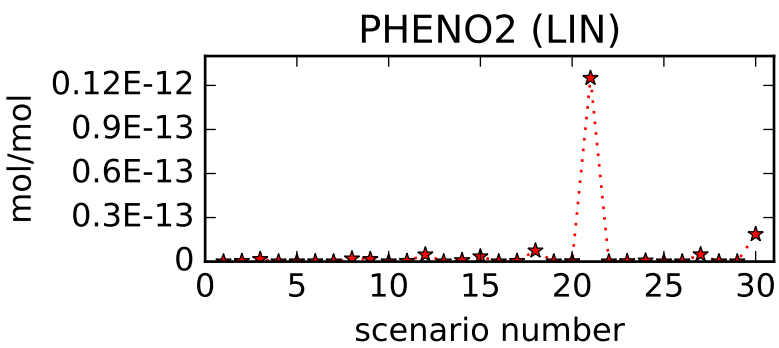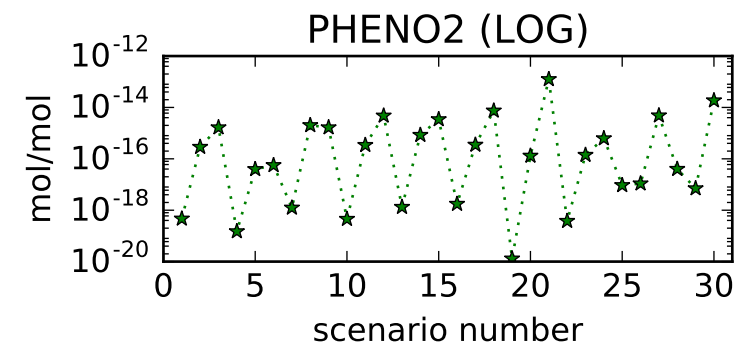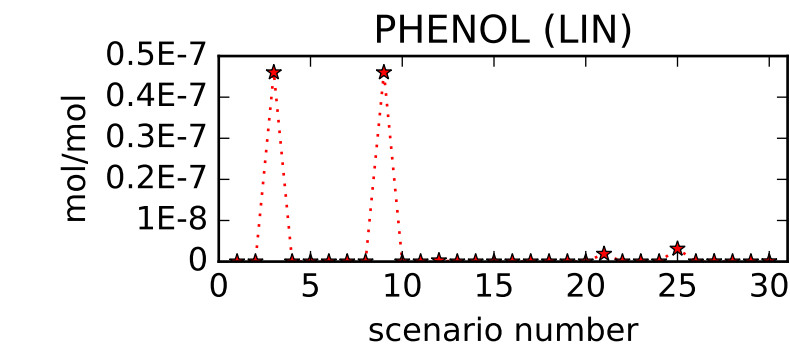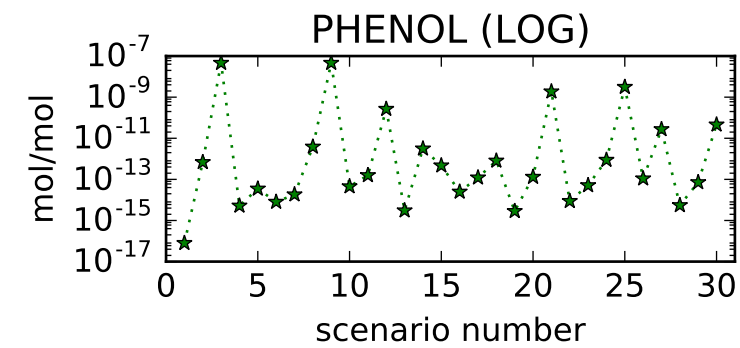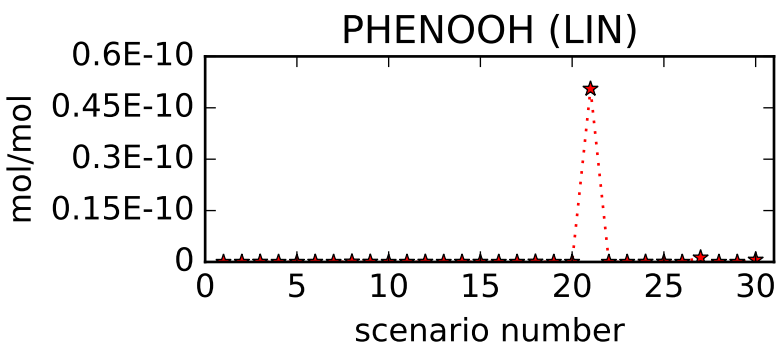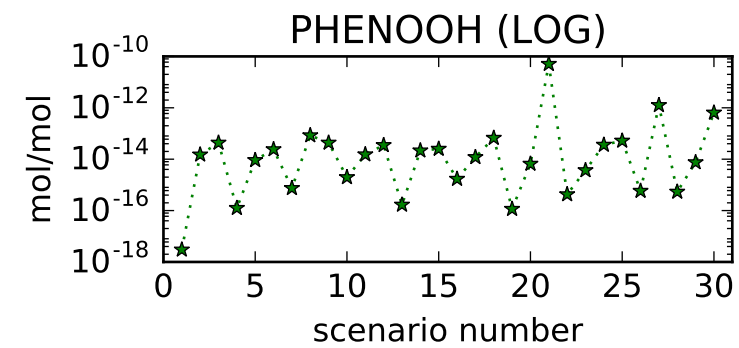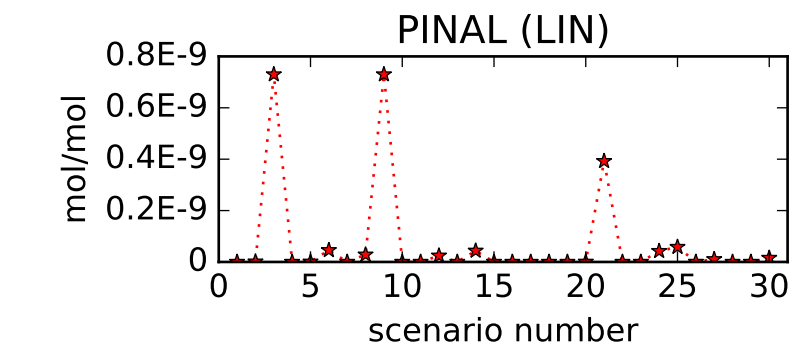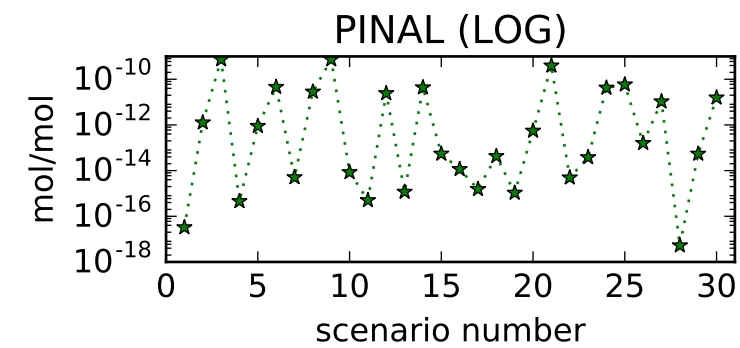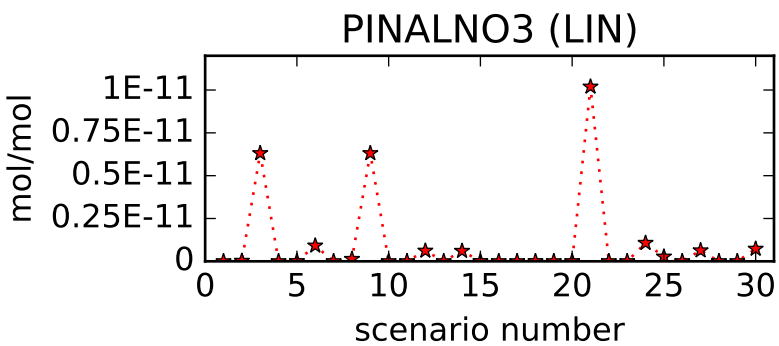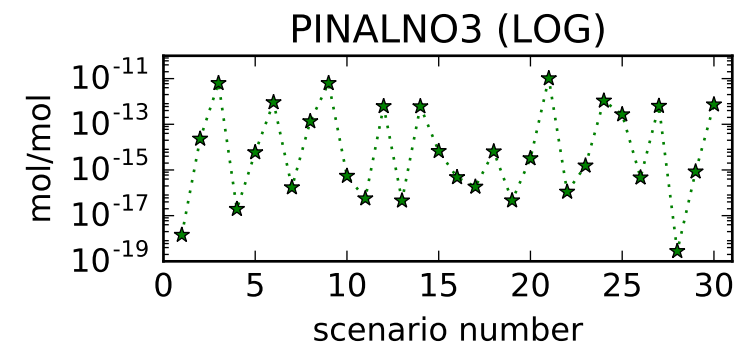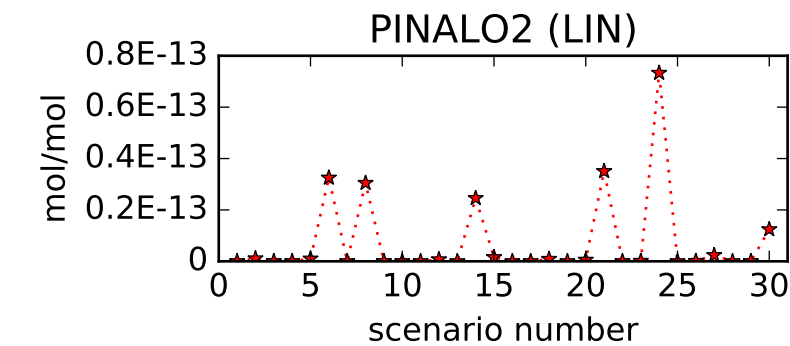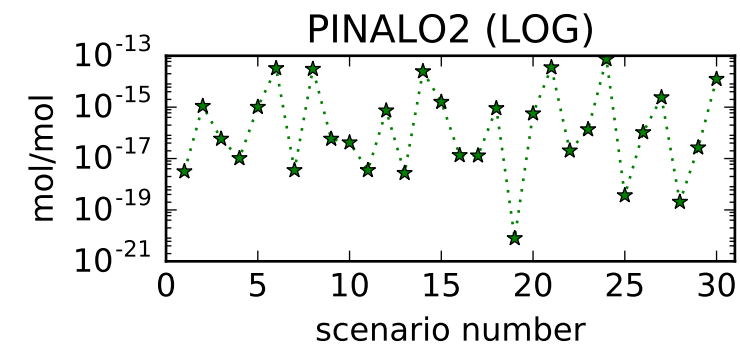

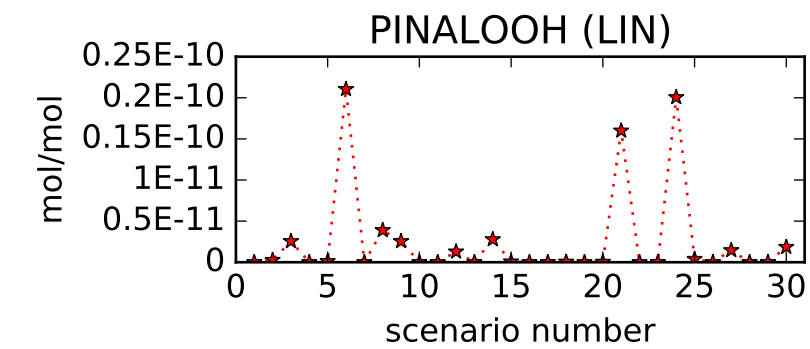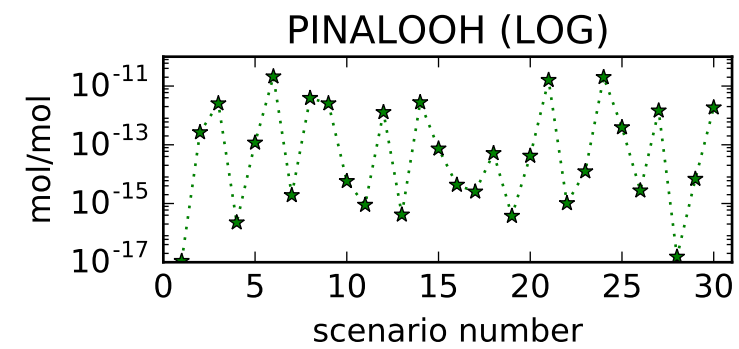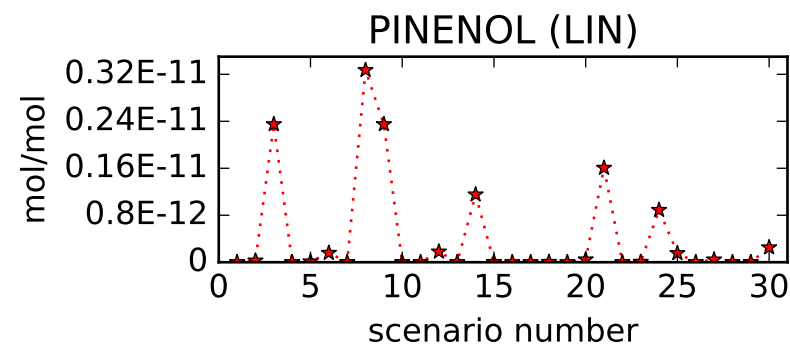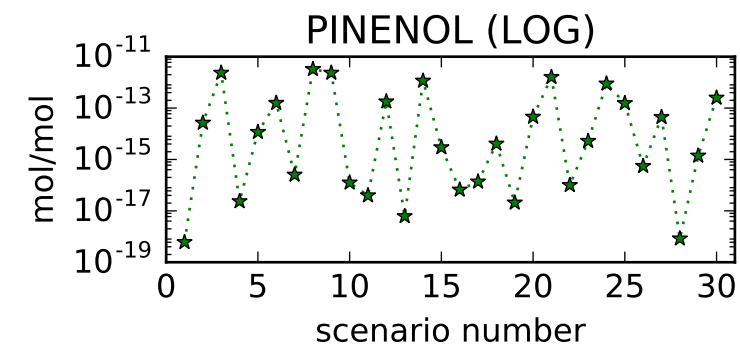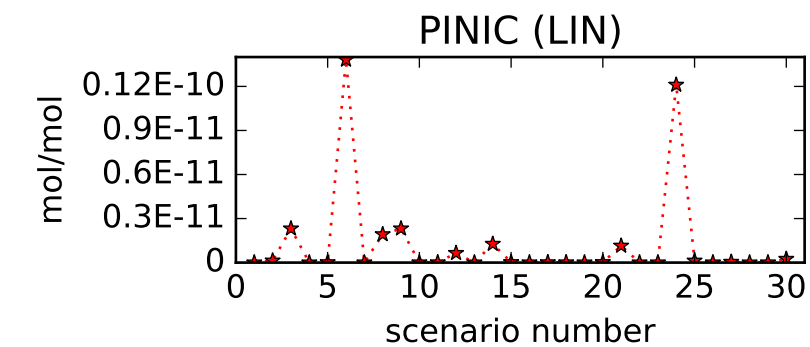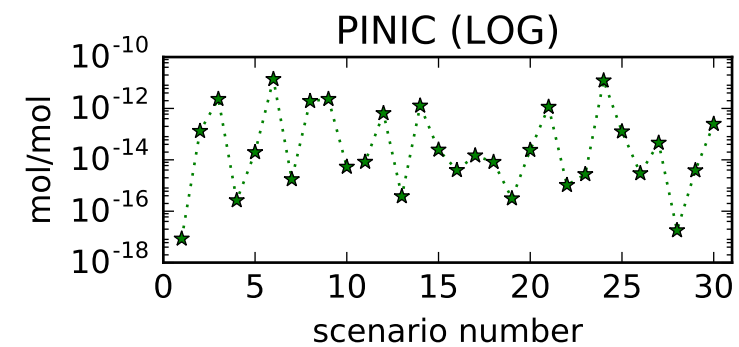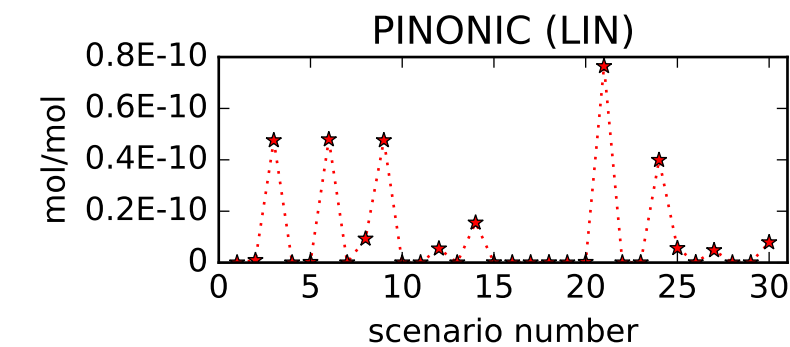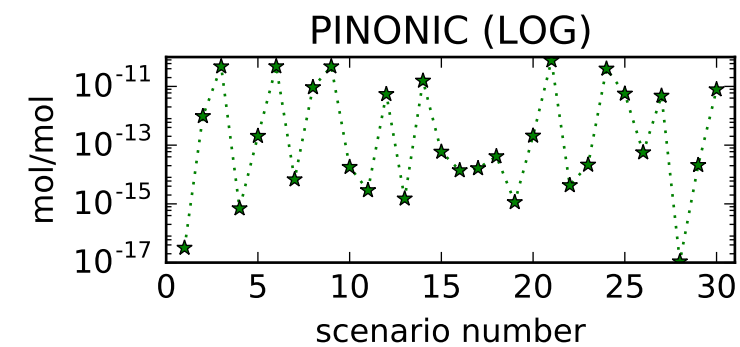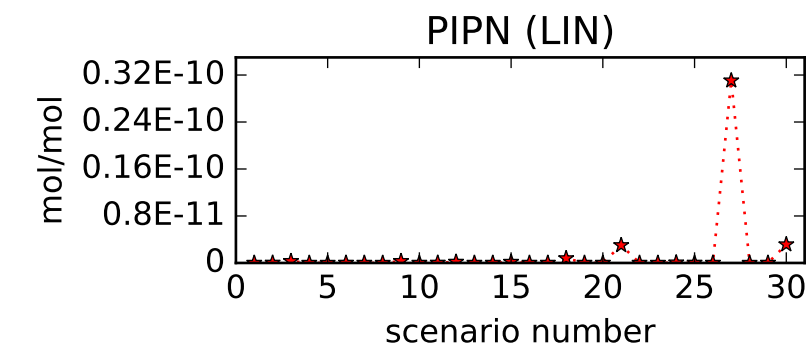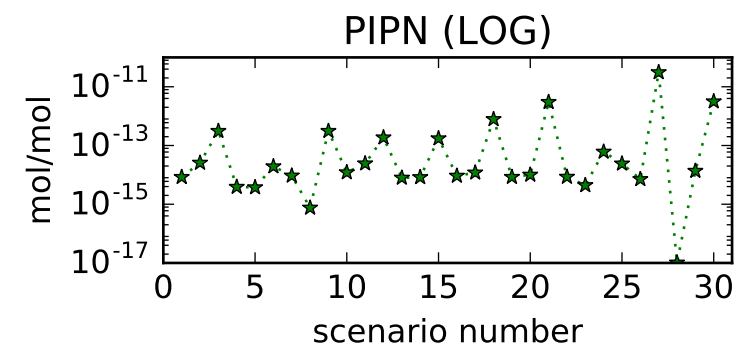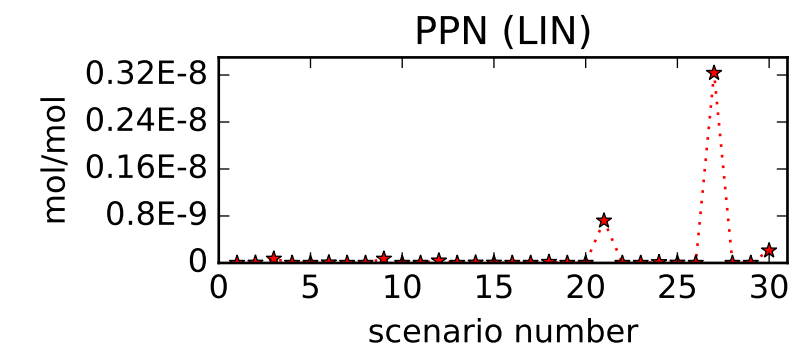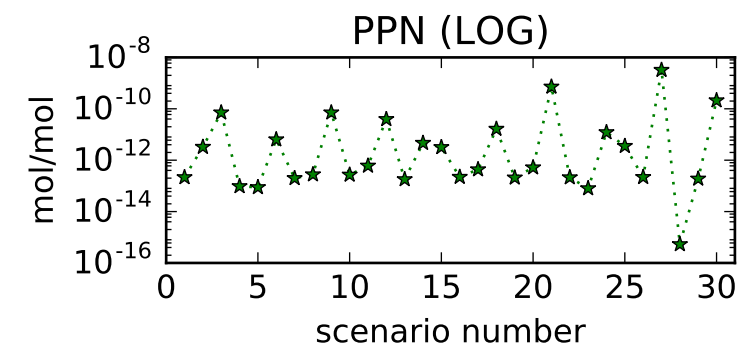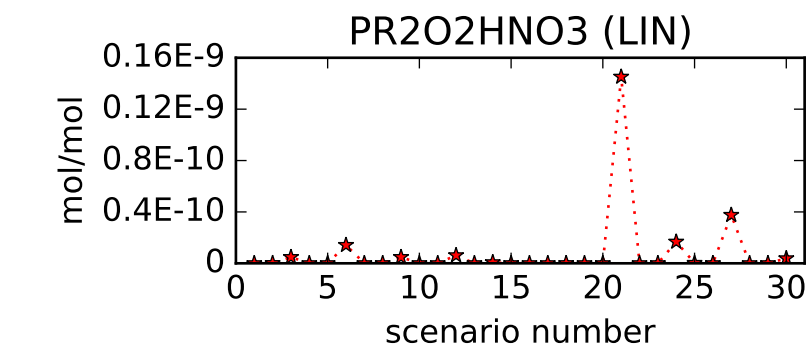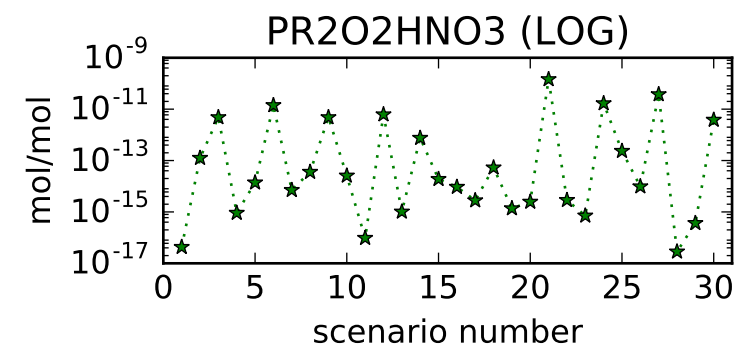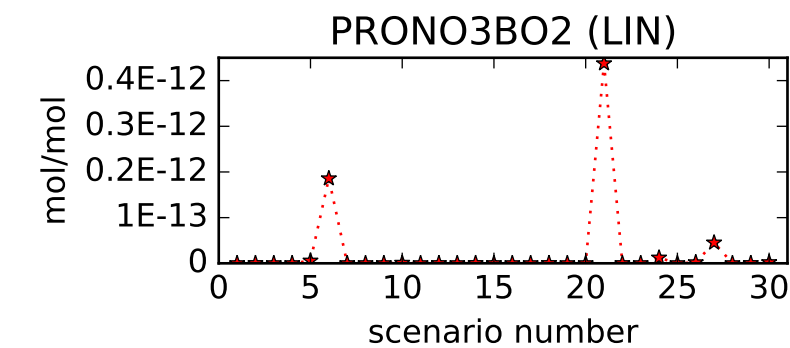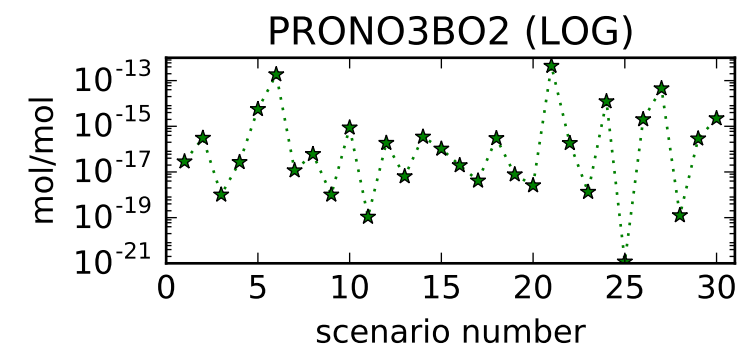



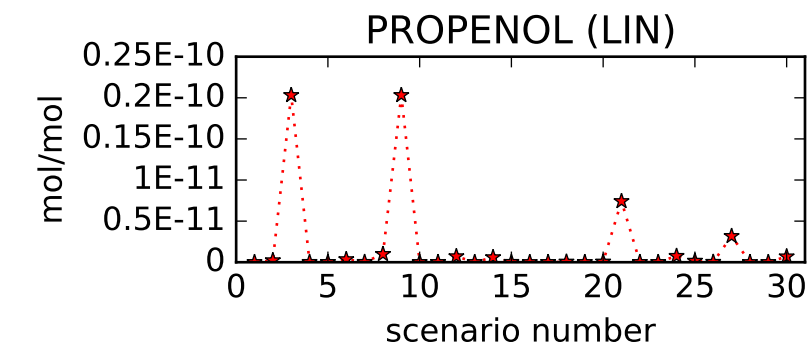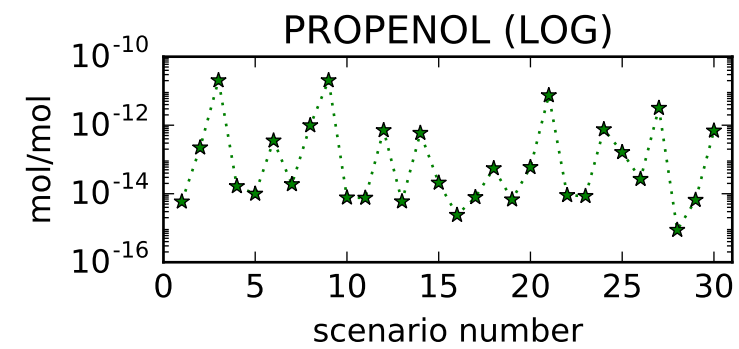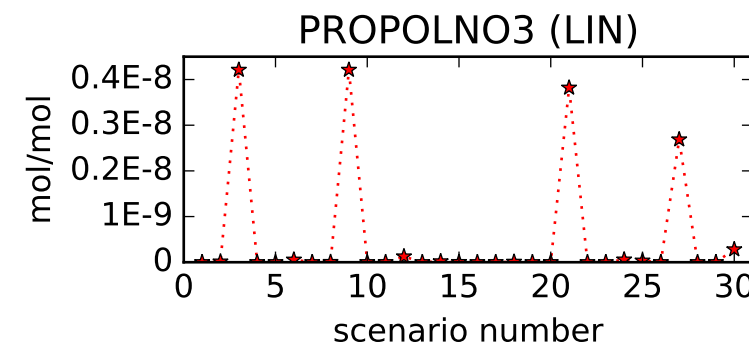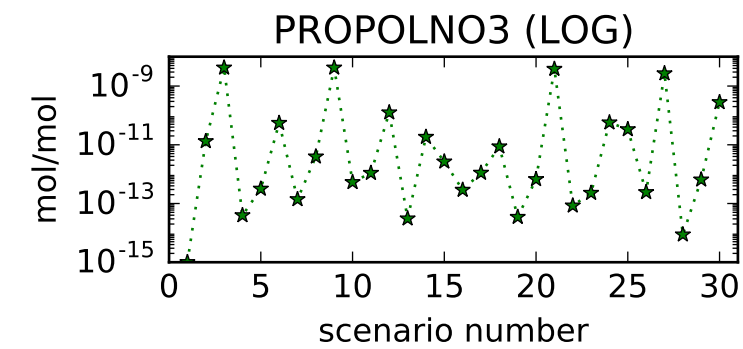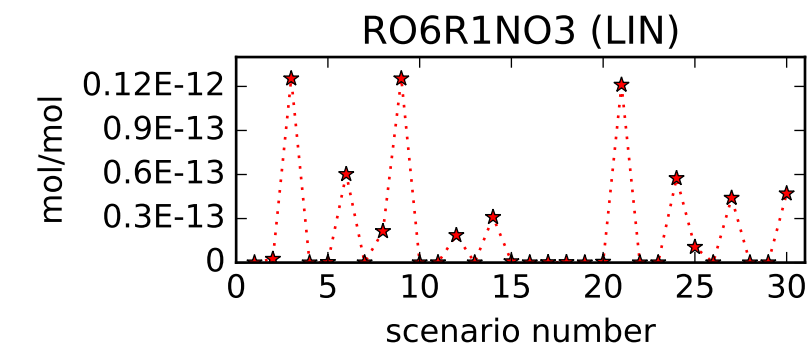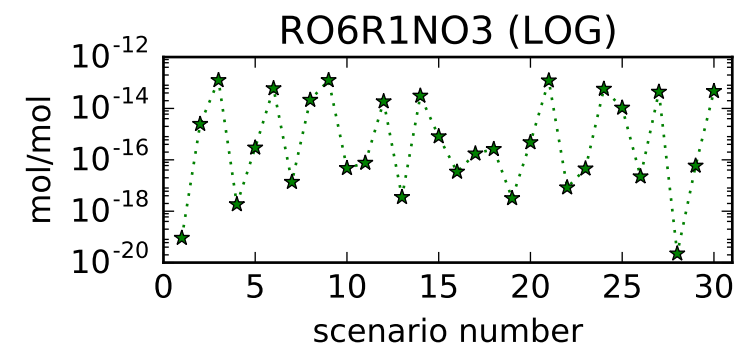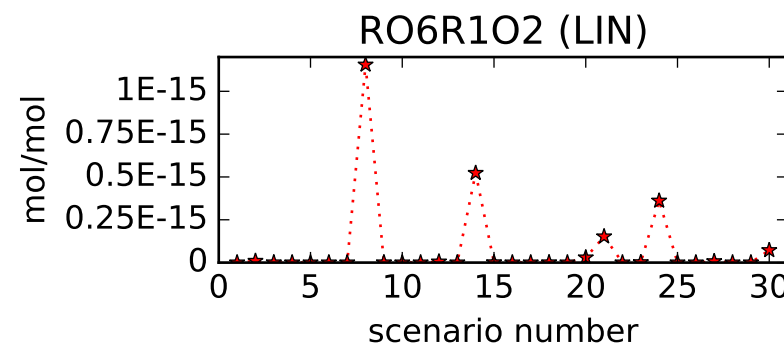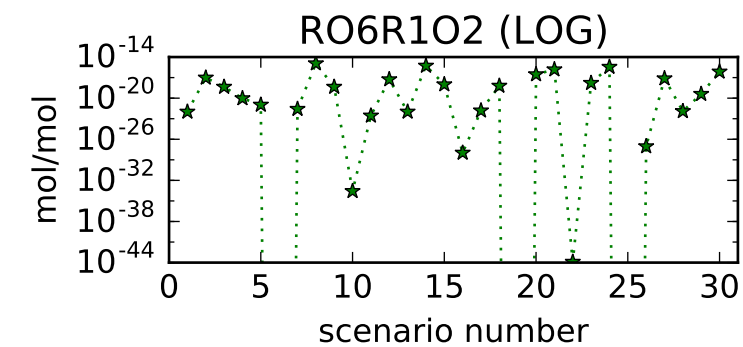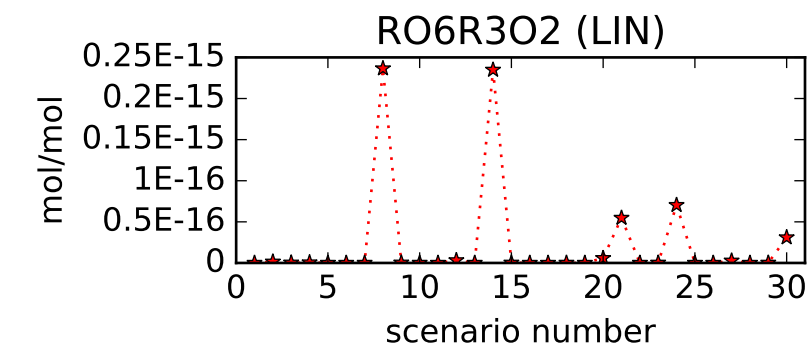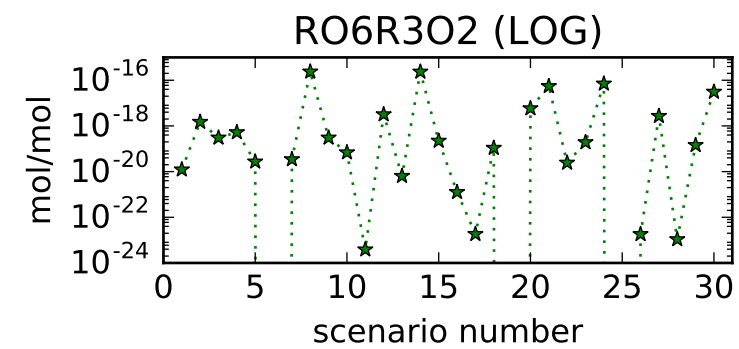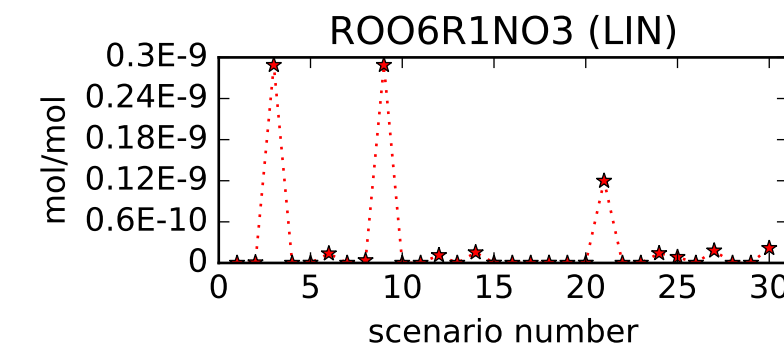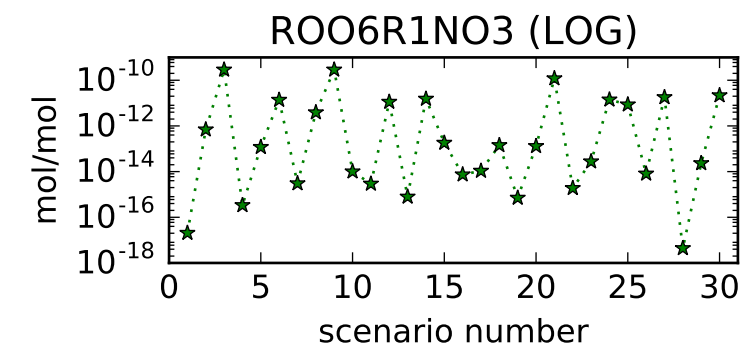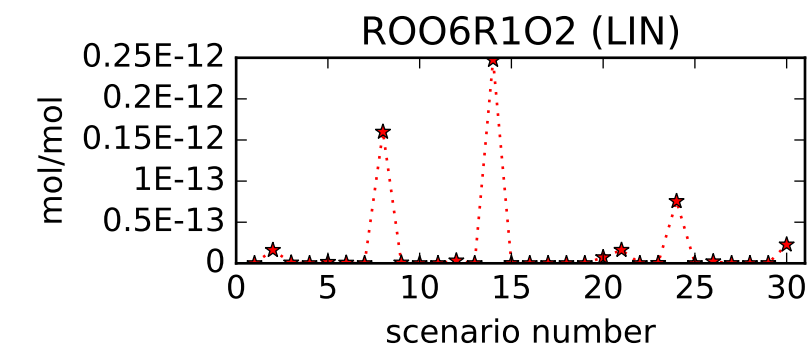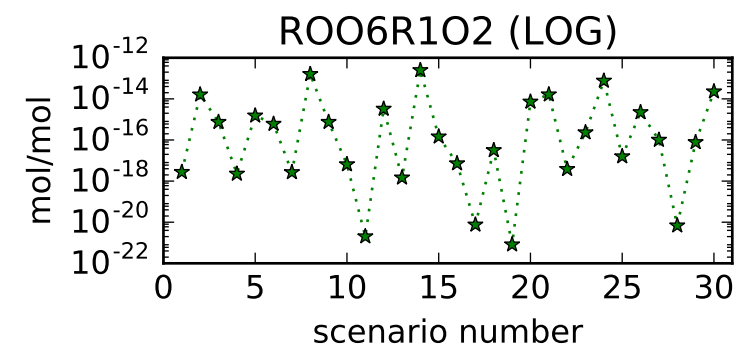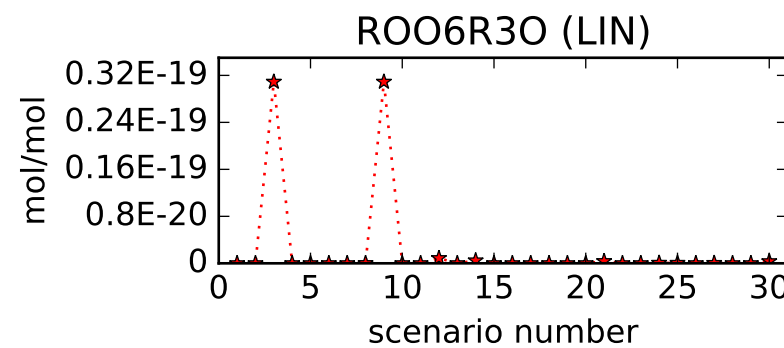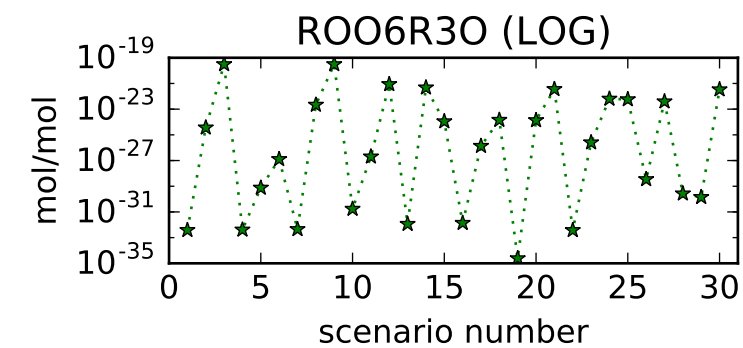

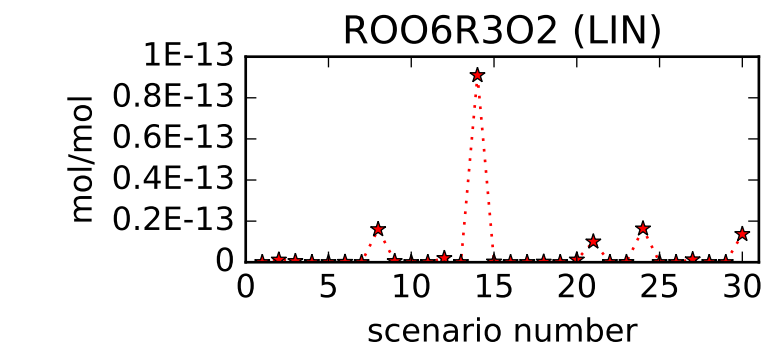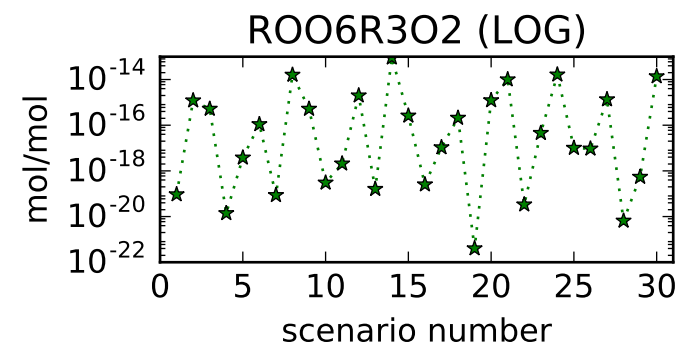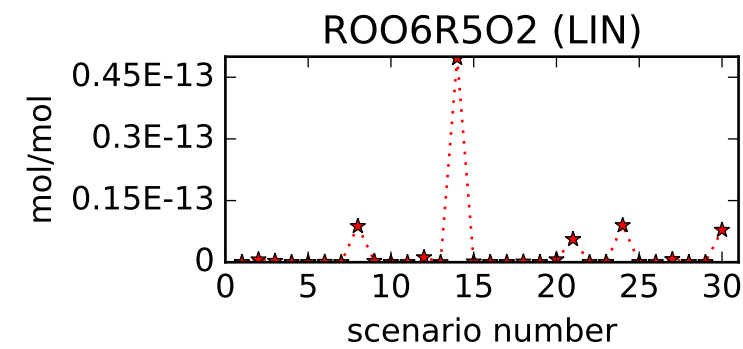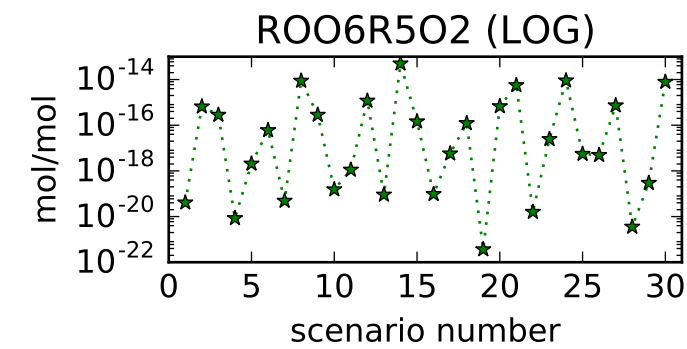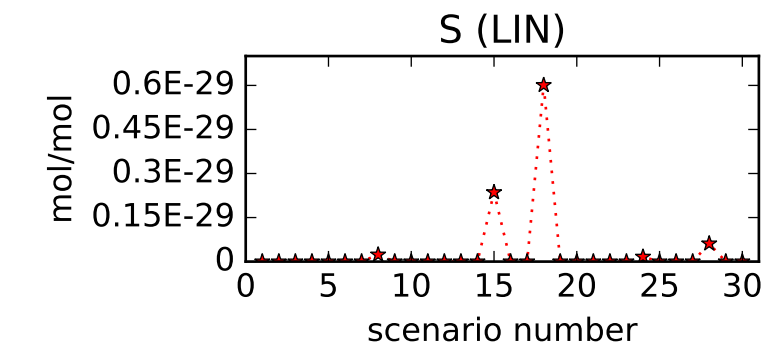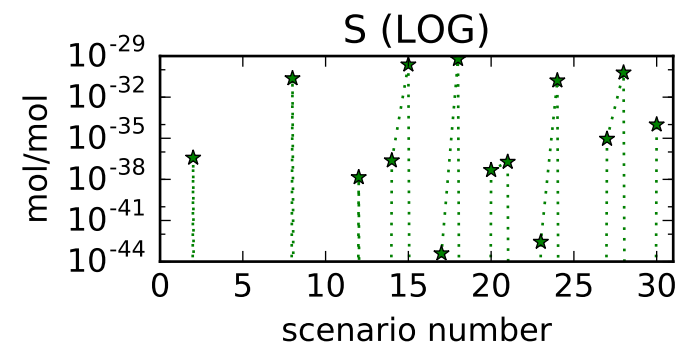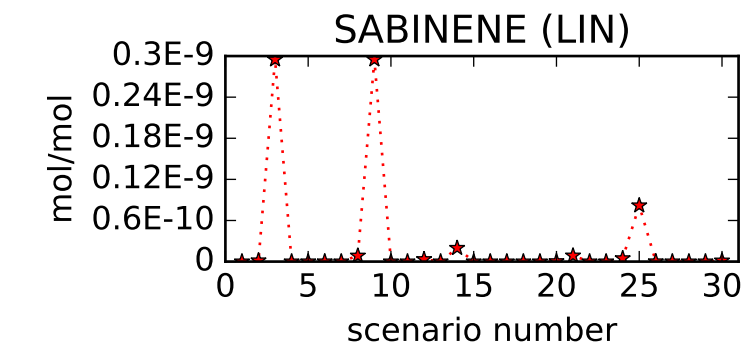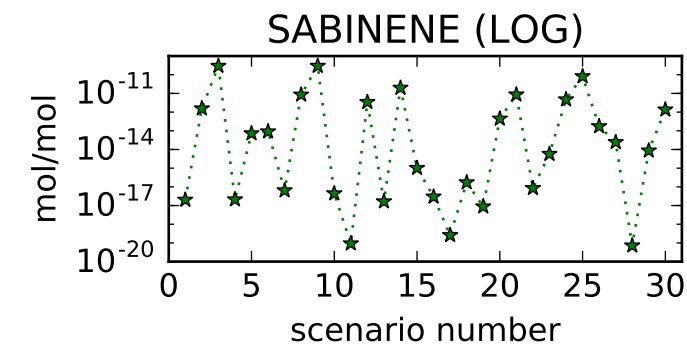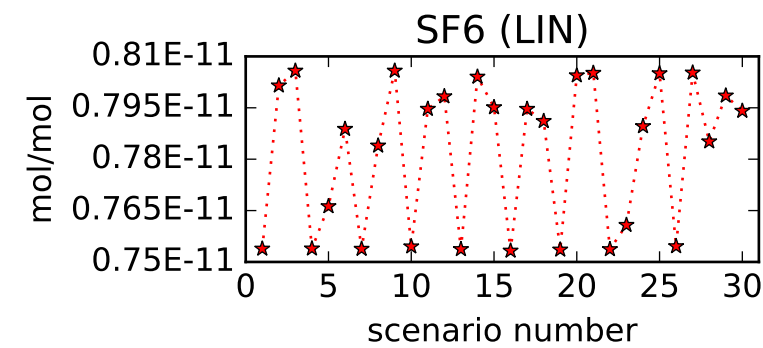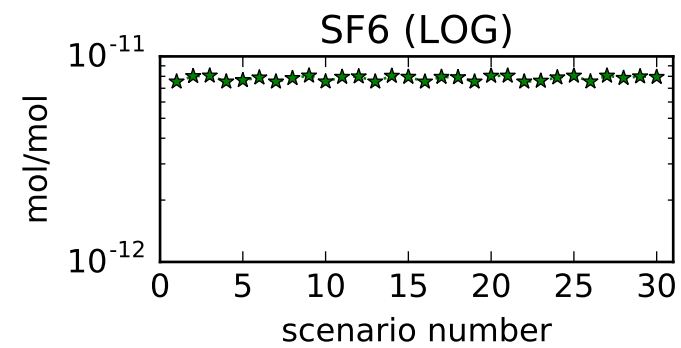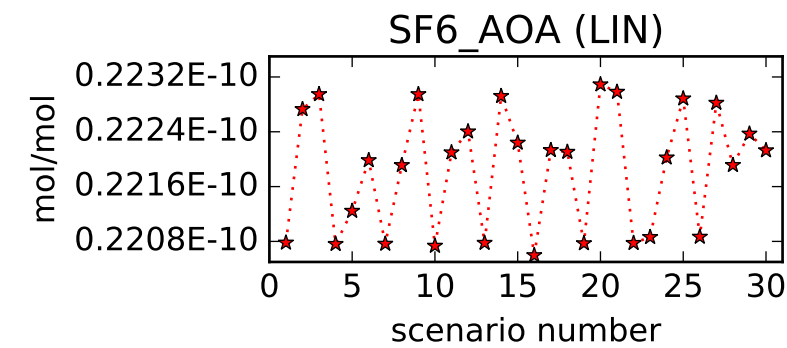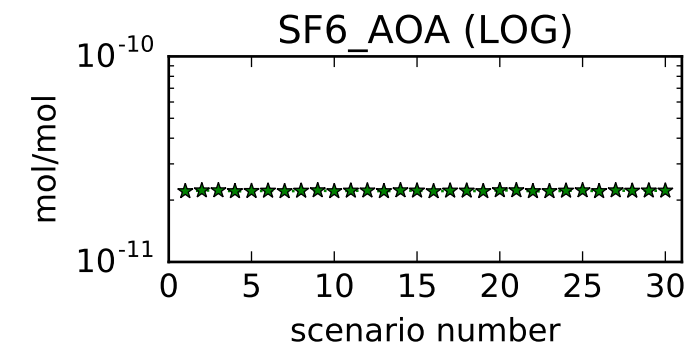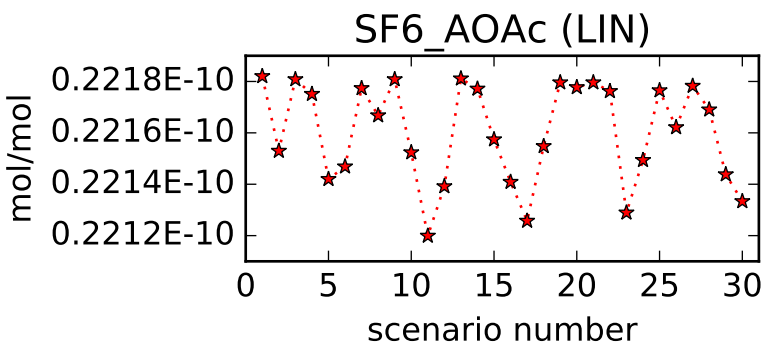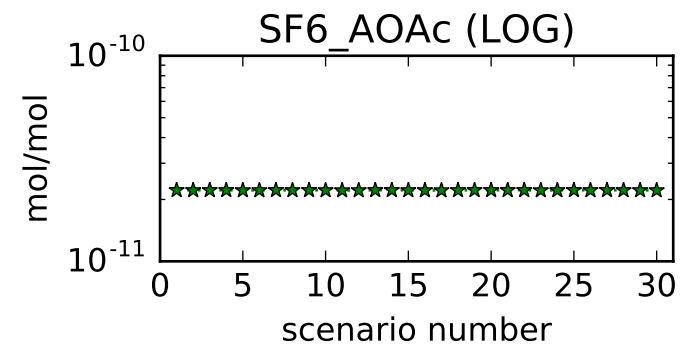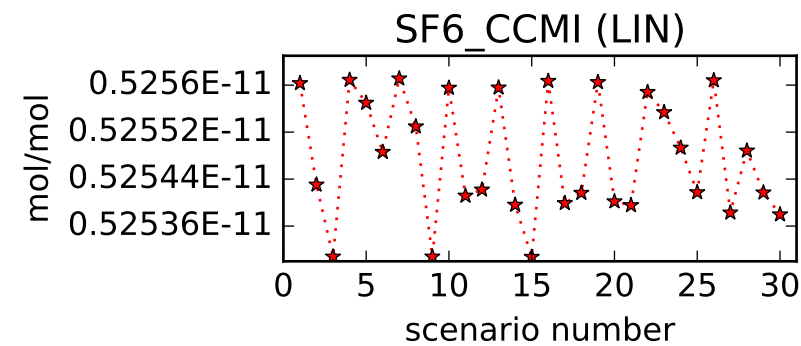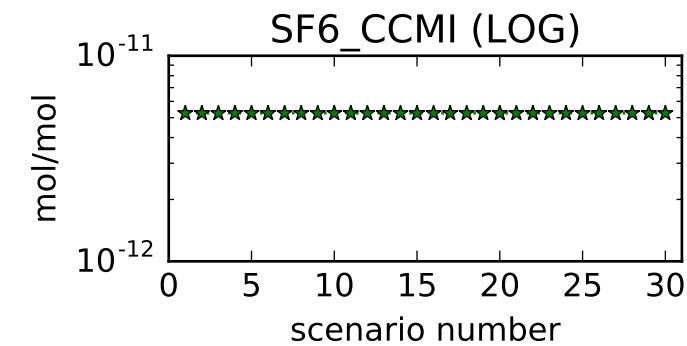

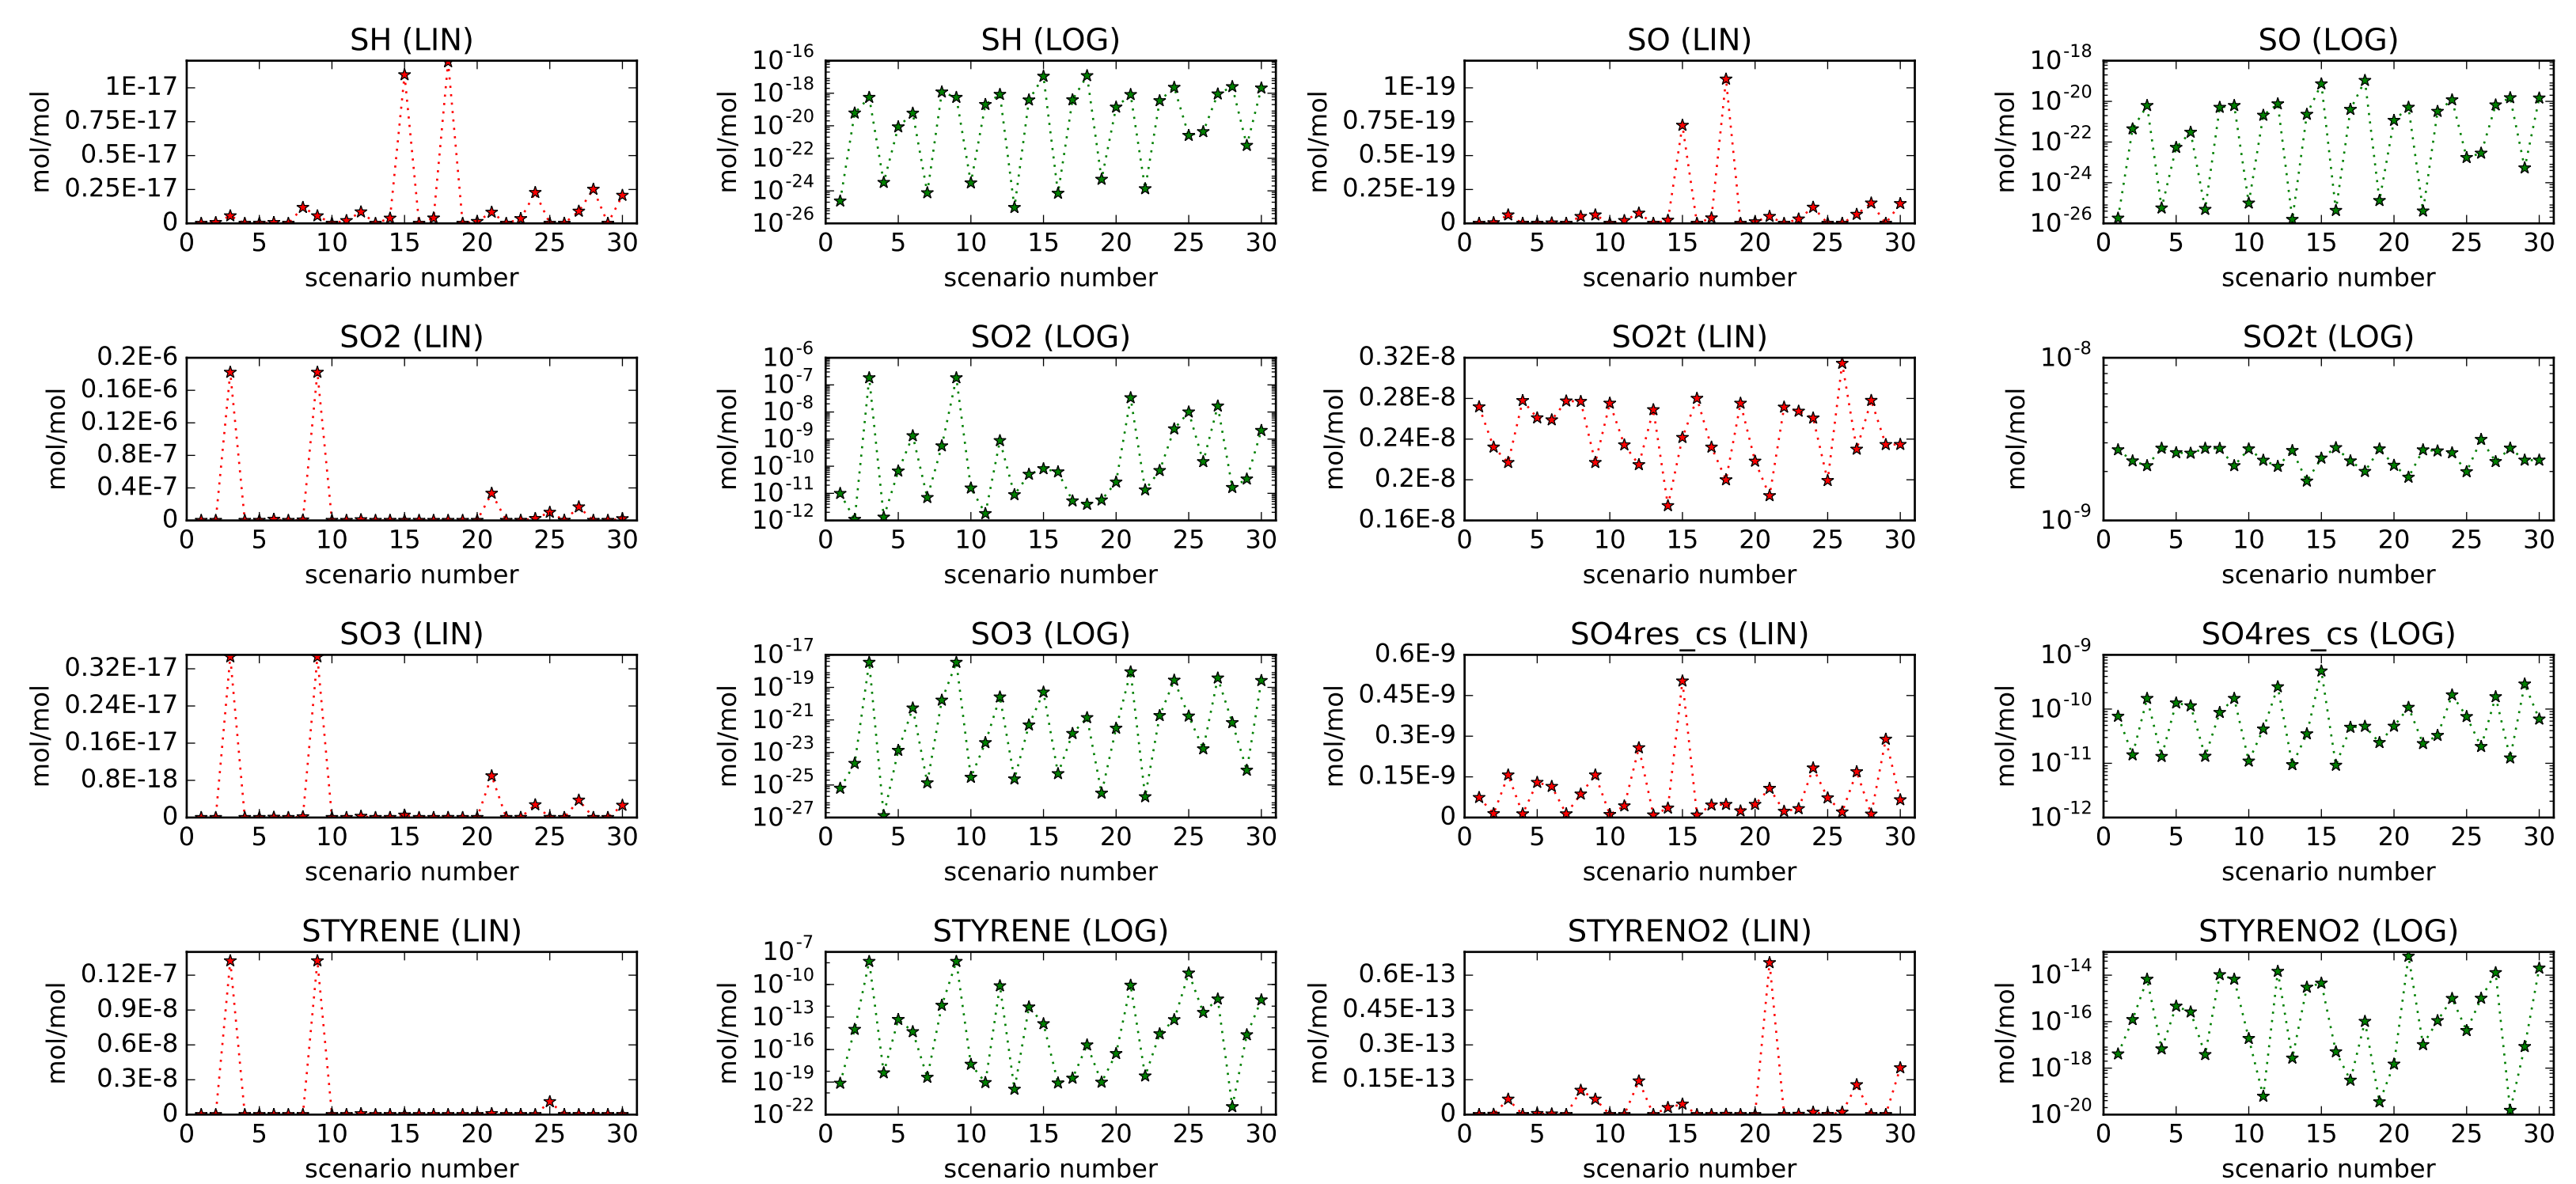

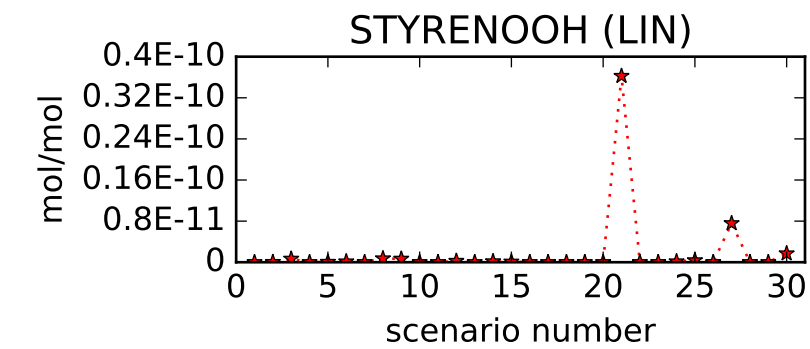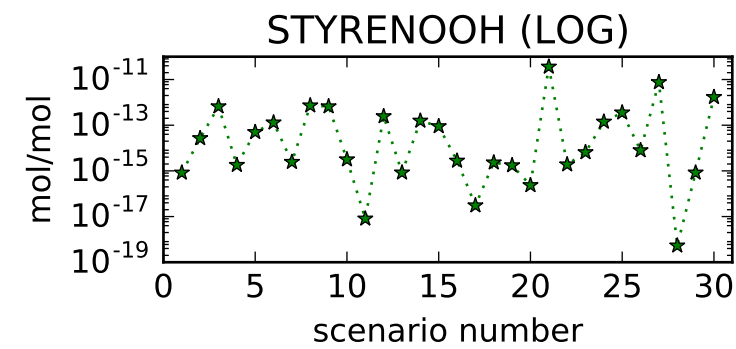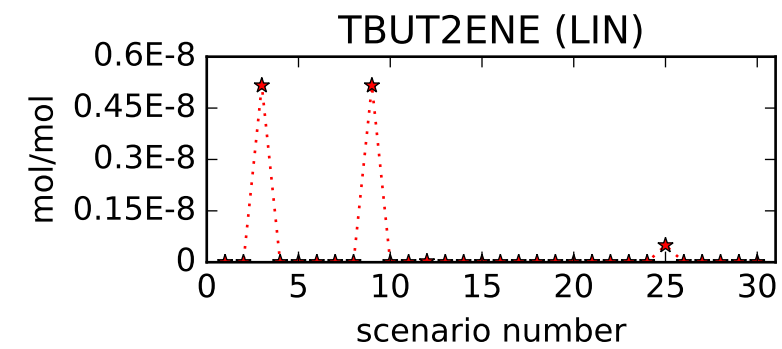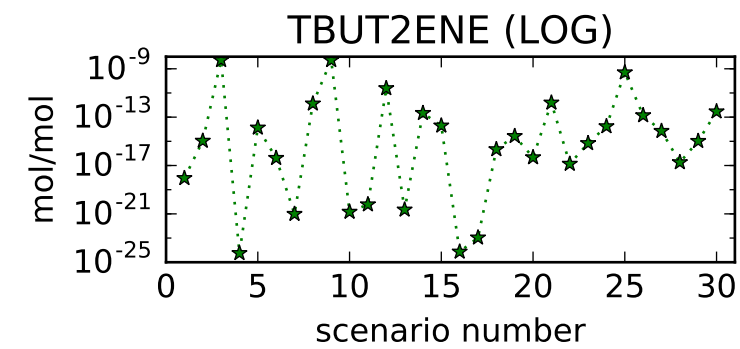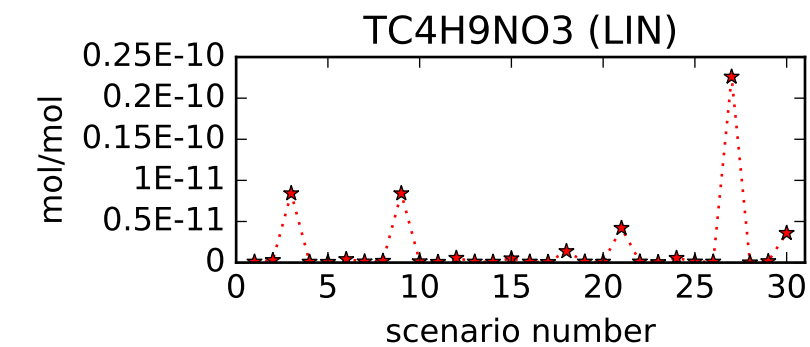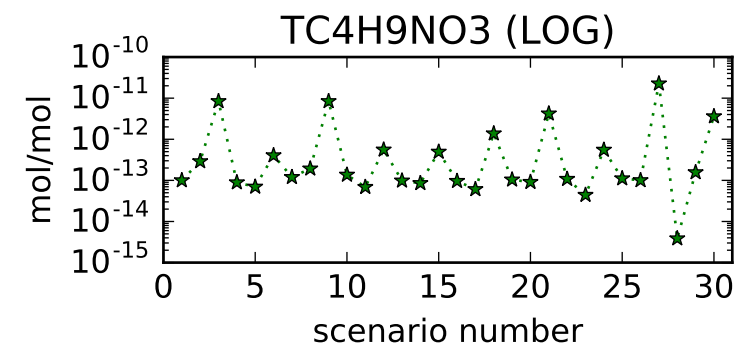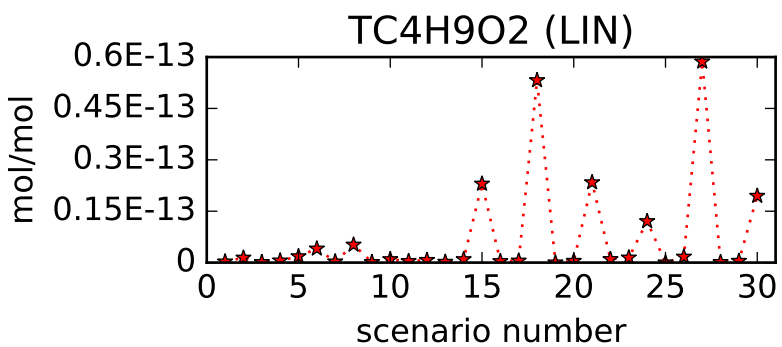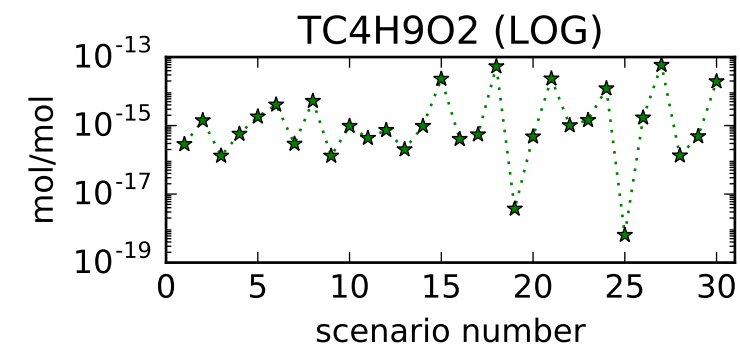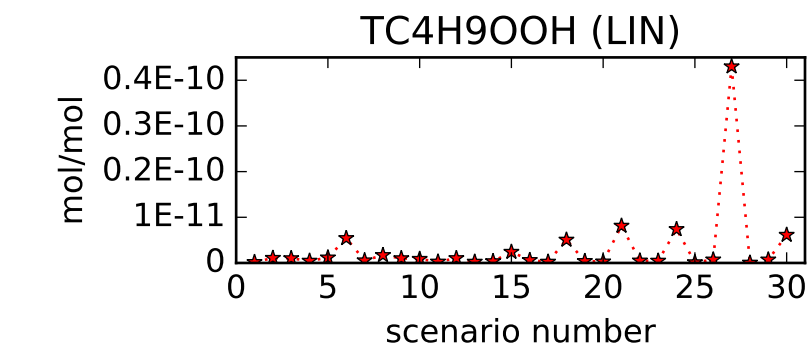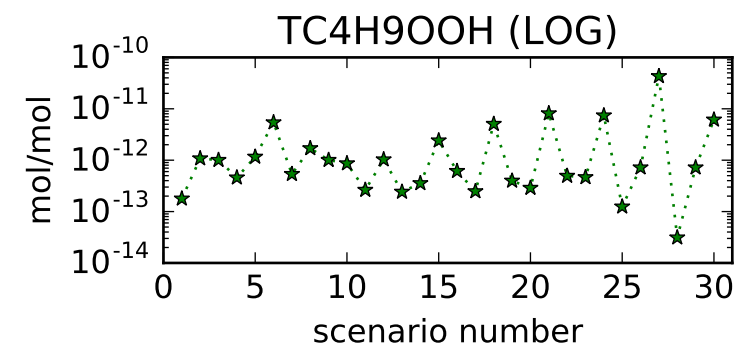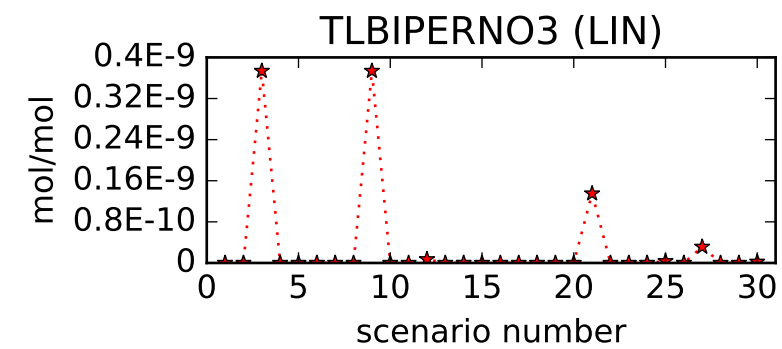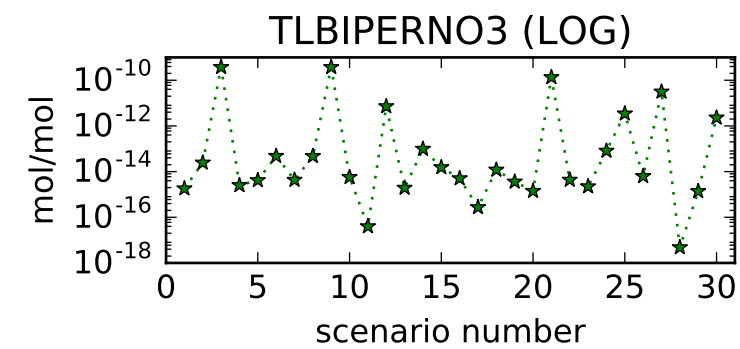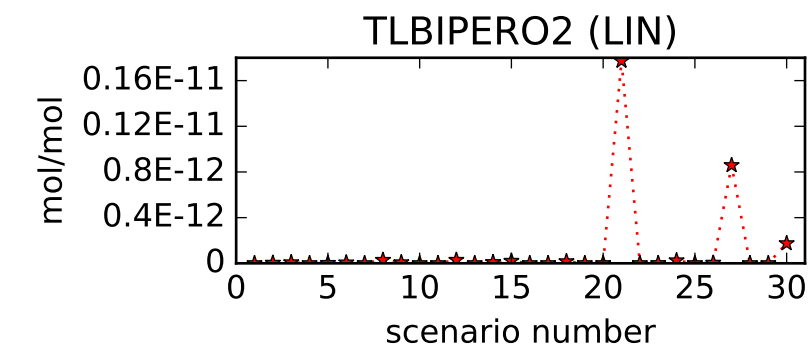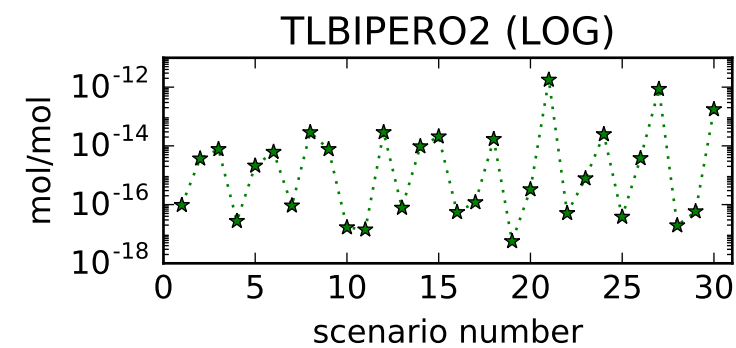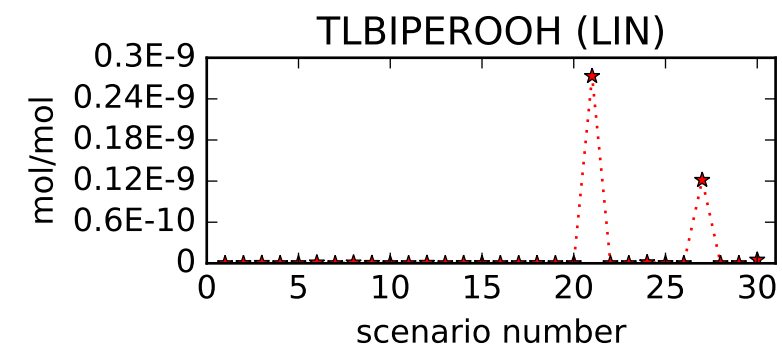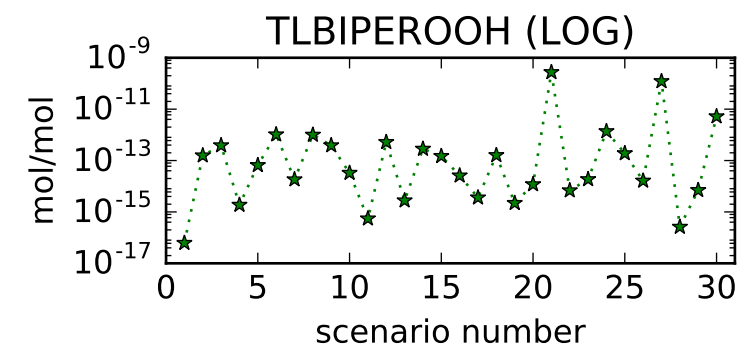

TLEMUCCO (LIN)

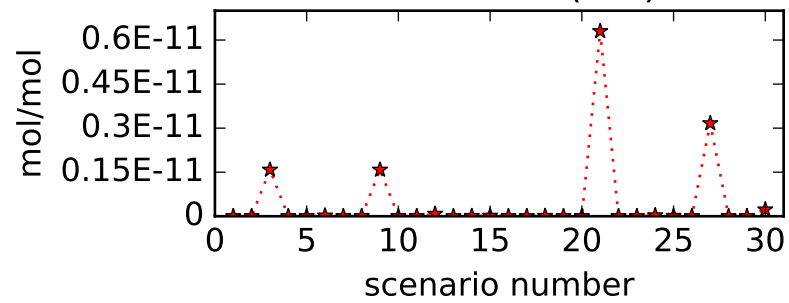

TLEMUCCO (LOG)

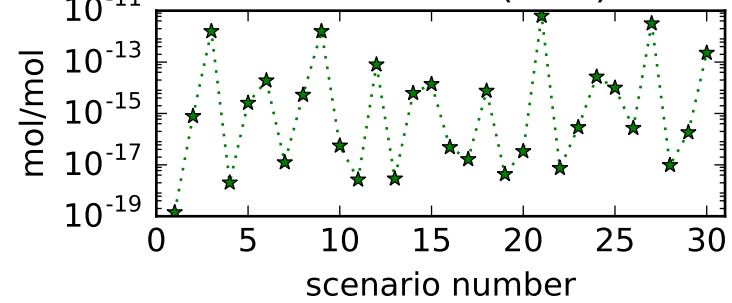

TLEMUCCO2H (LIN)

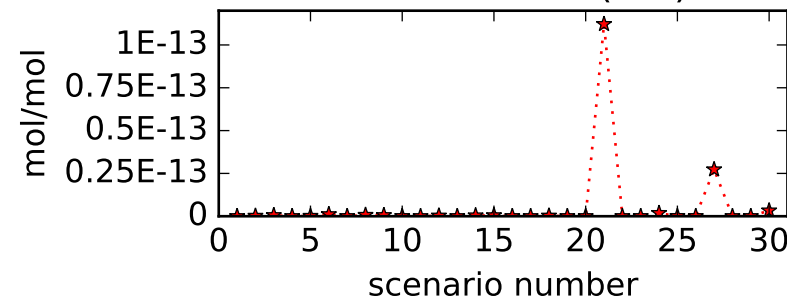

TLEMUCCO2H (LOG)

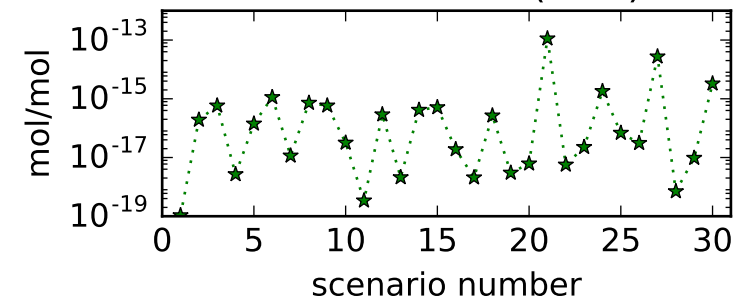

TLEMUCCO3 (LIN)

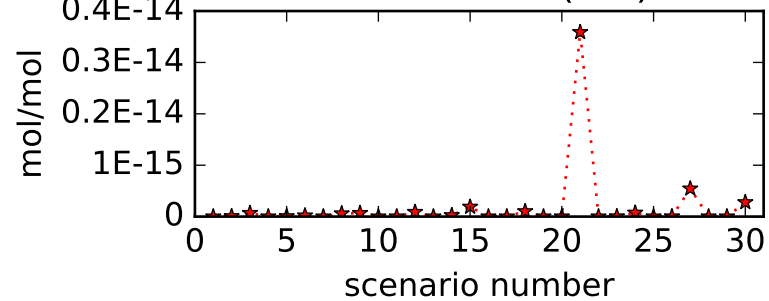

TLEMUCCO3 (LOG)

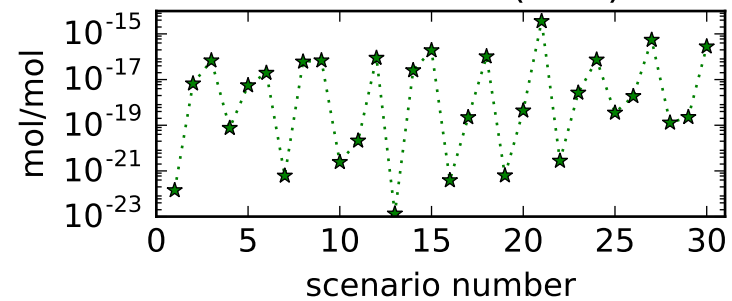

TLEMUCCO3H (LIN)

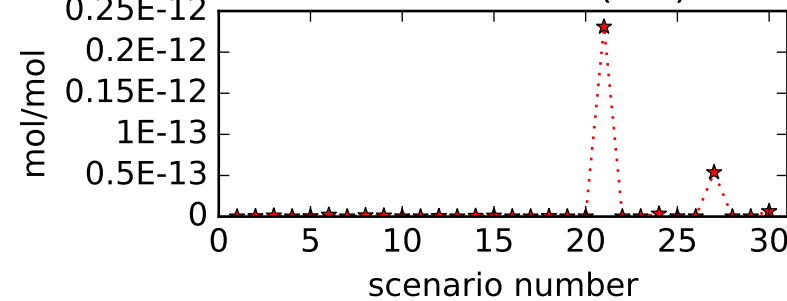

TLEMUCCO3H (LOG)

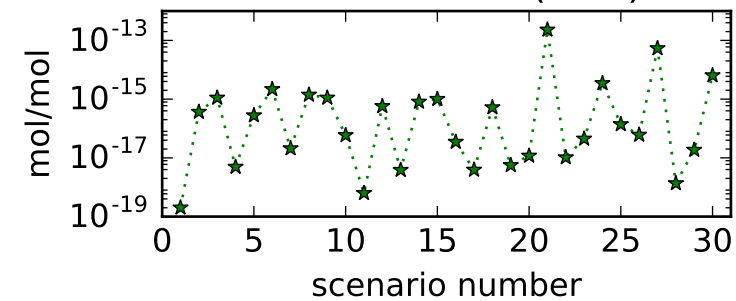

TLEMUCNO3 (LIN)

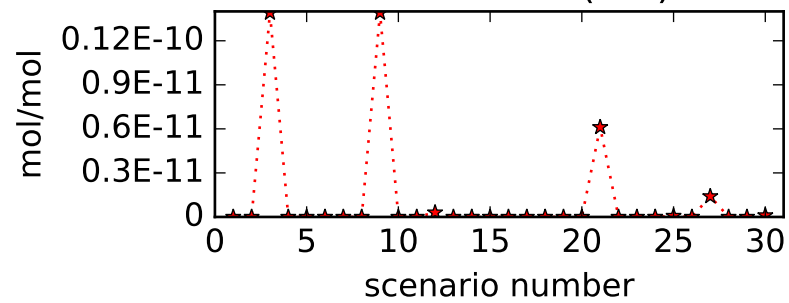

TLEMUCNO3 (LOG)

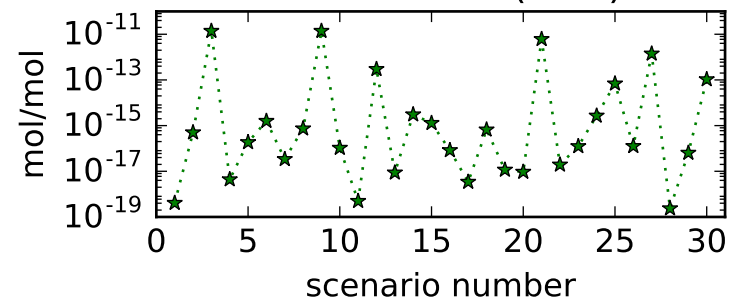

TLEMUCO2 (LIN)

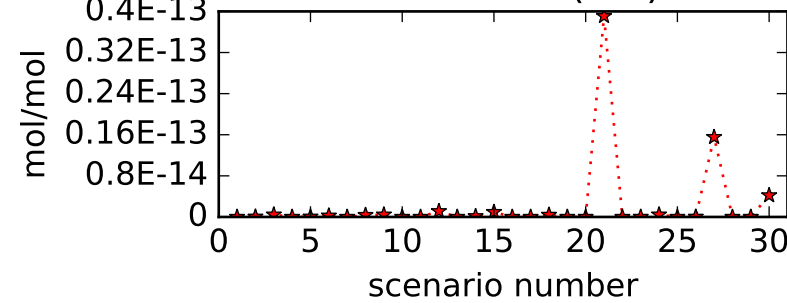

TLEMUCO2 (LOG)

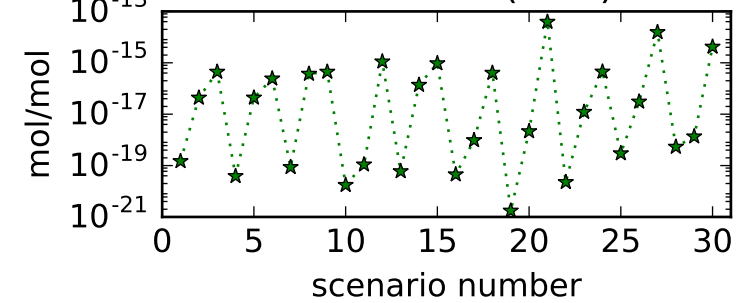

TLEMUCOOH (LIN)

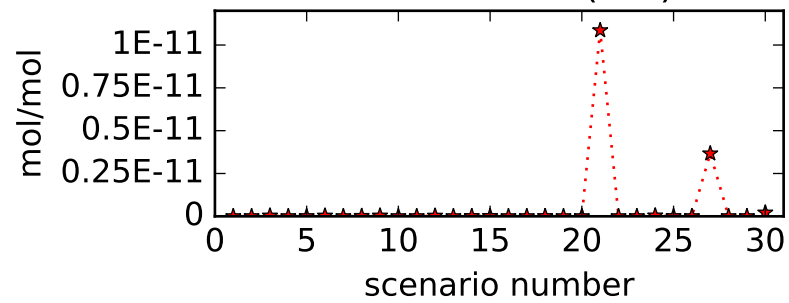

TLEMUCOOH (LOG)

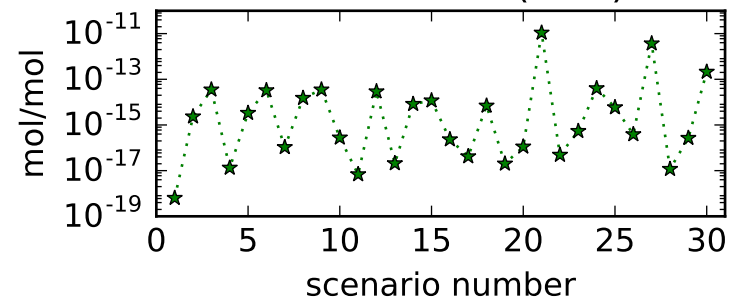

TLEMUCPAN (LIN)

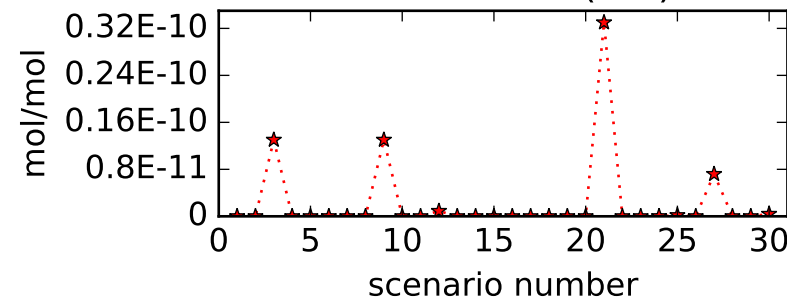

TLEMUCPAN (LOG)

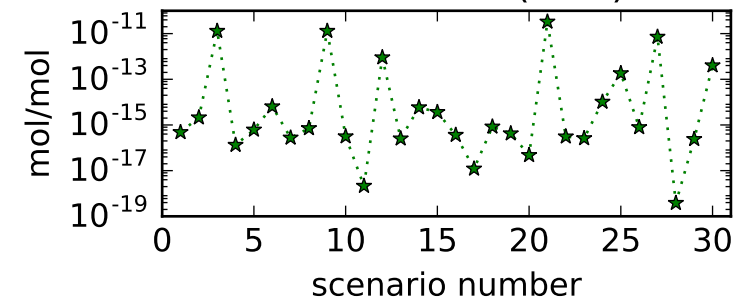



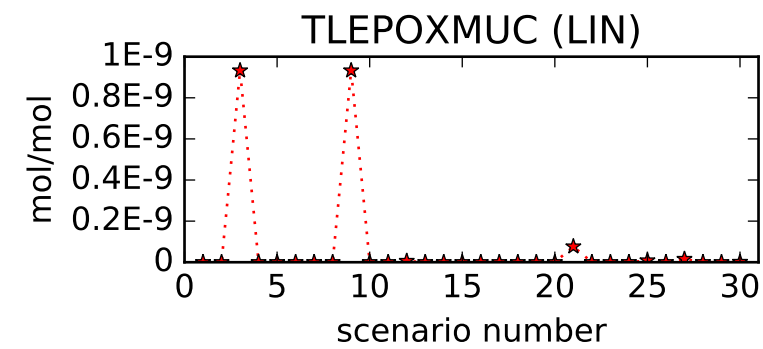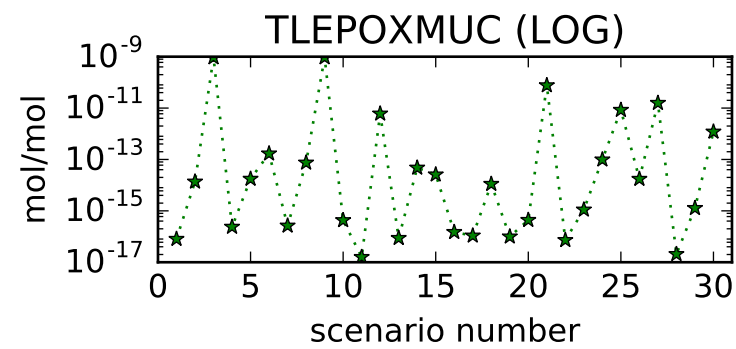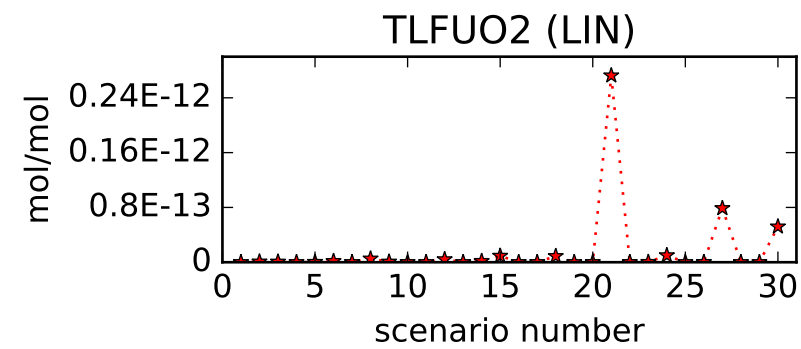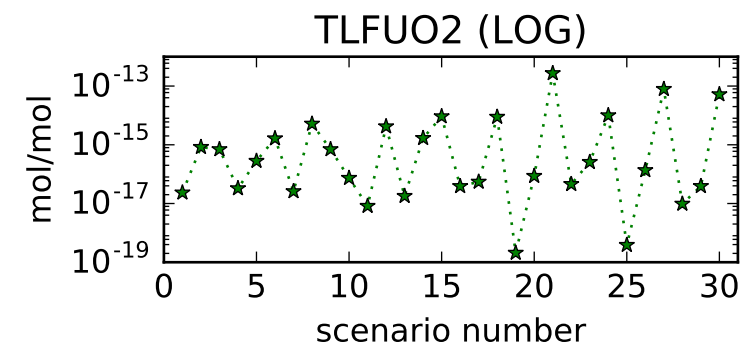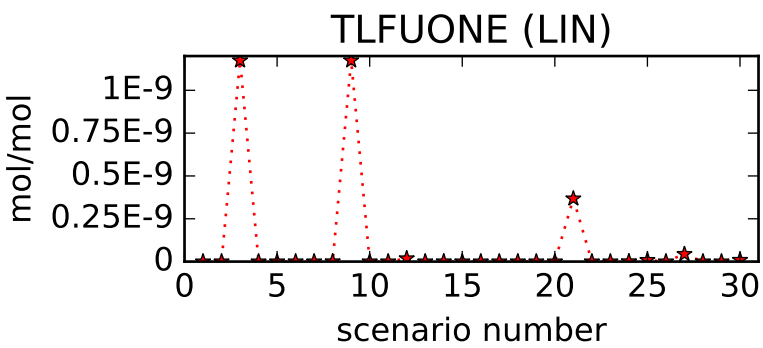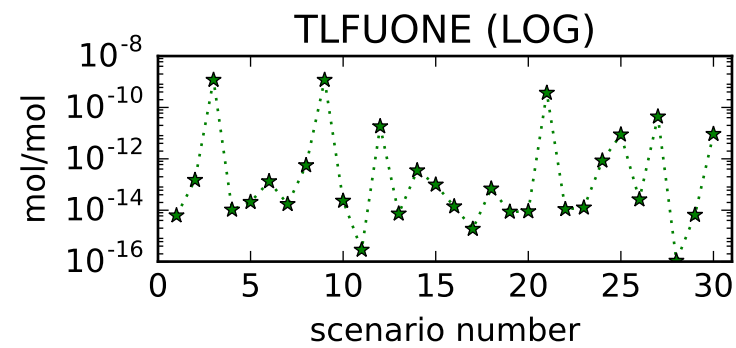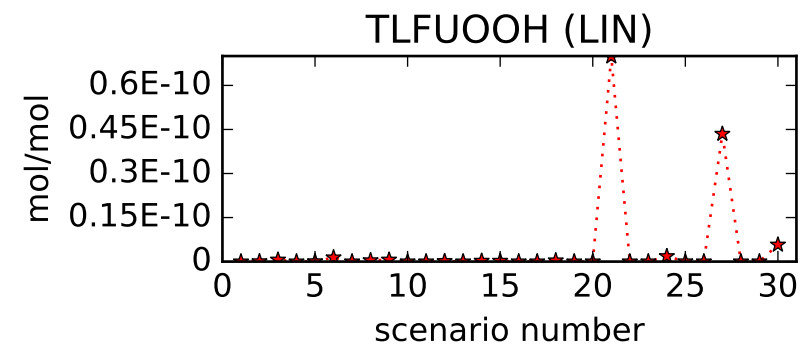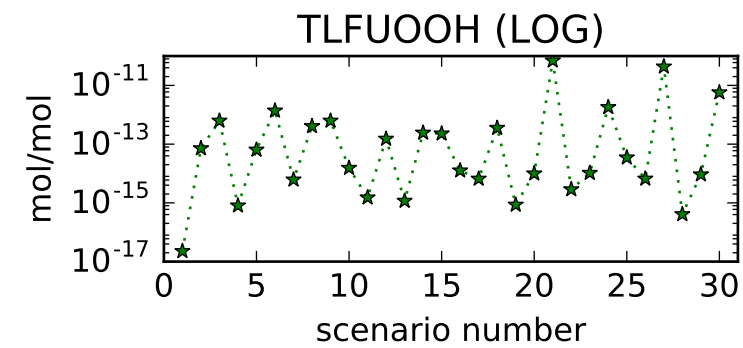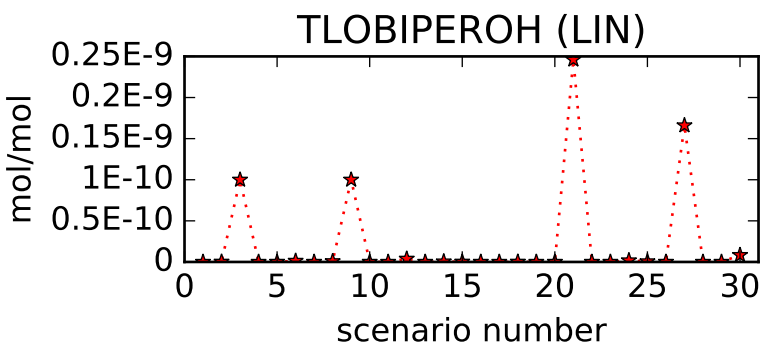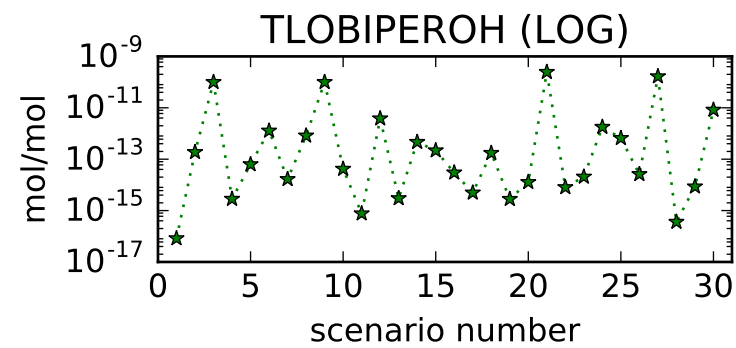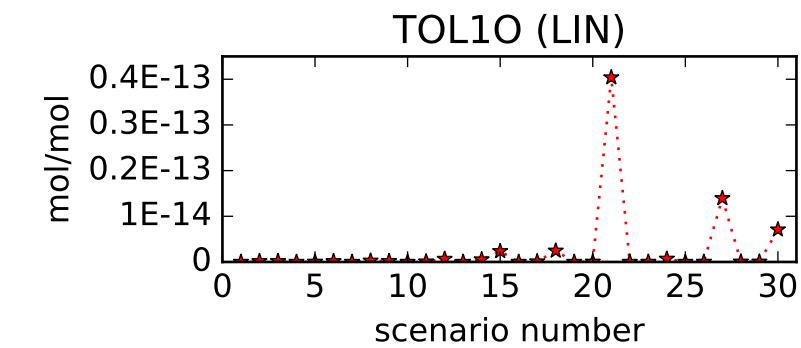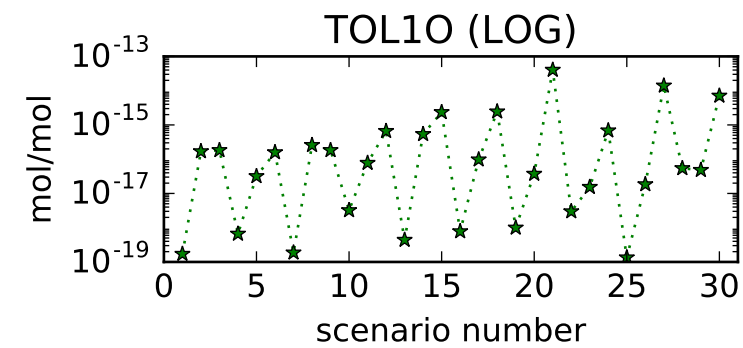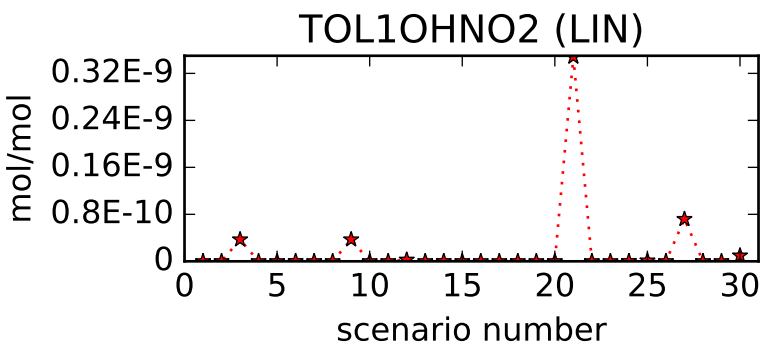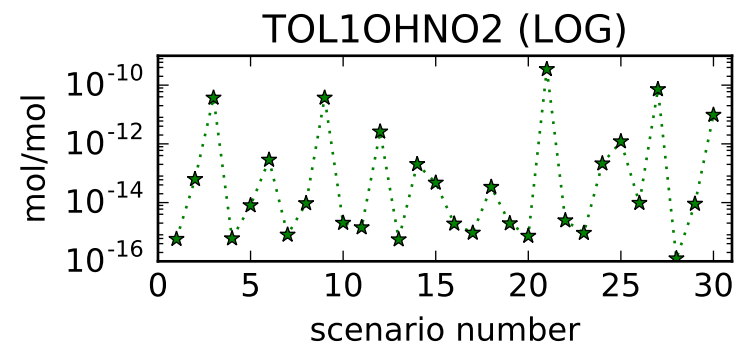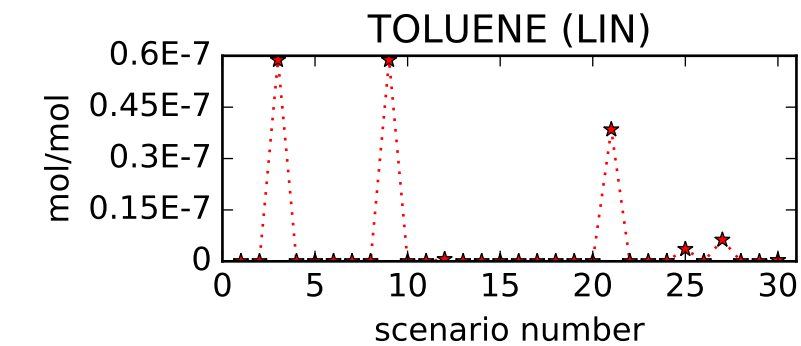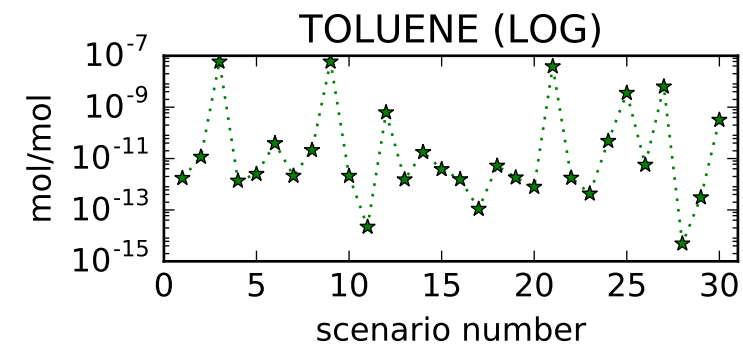

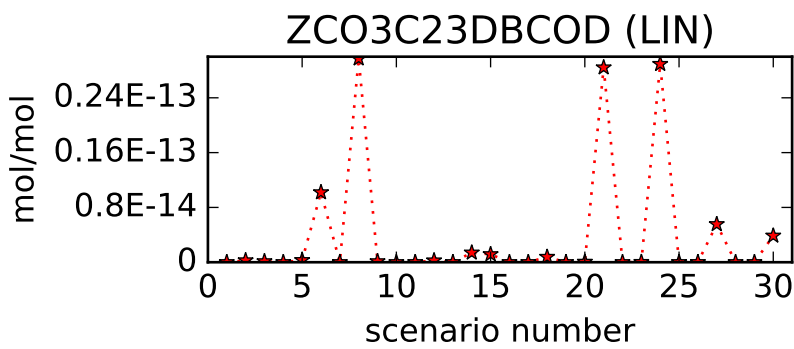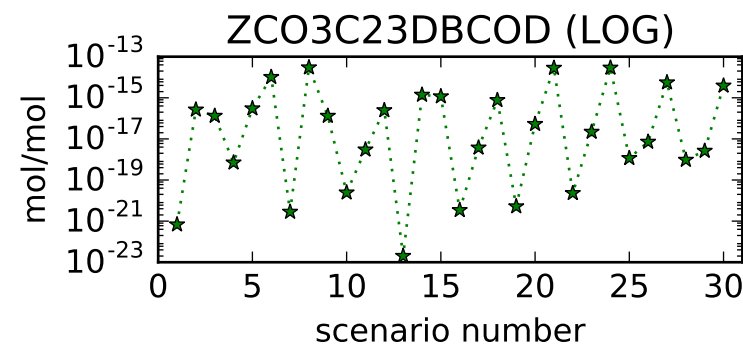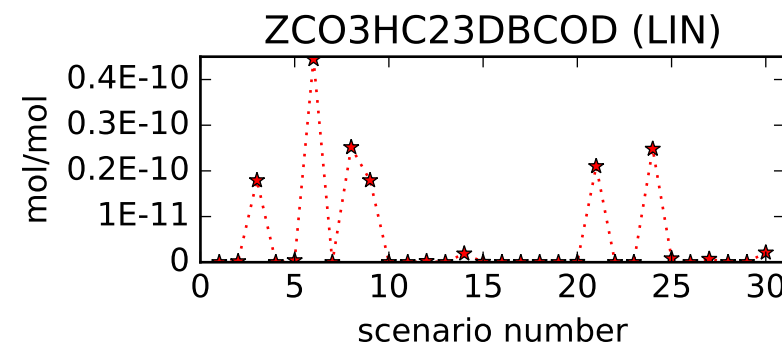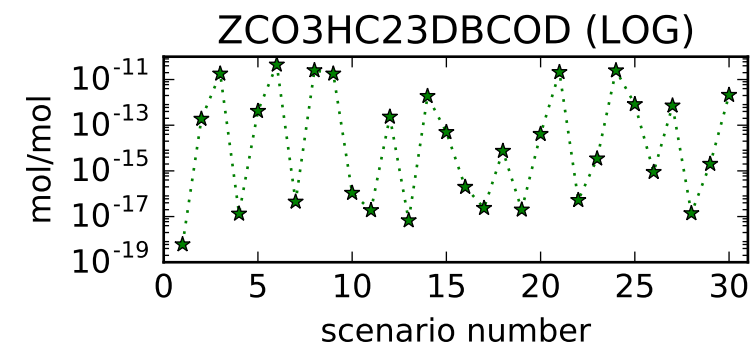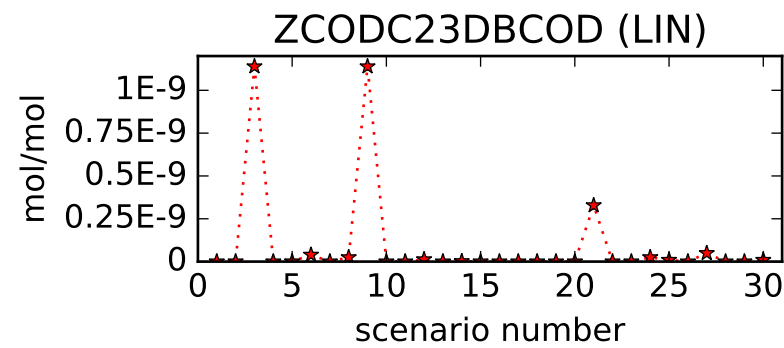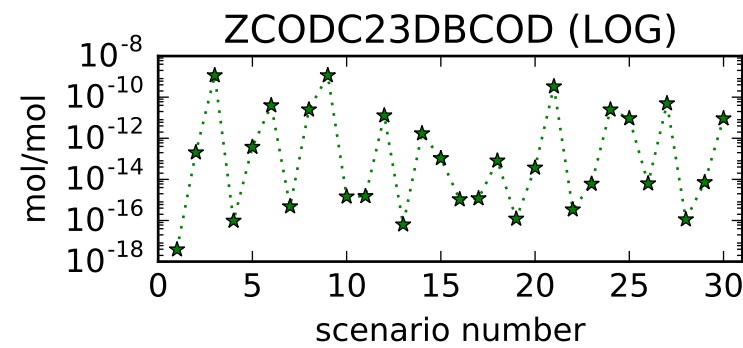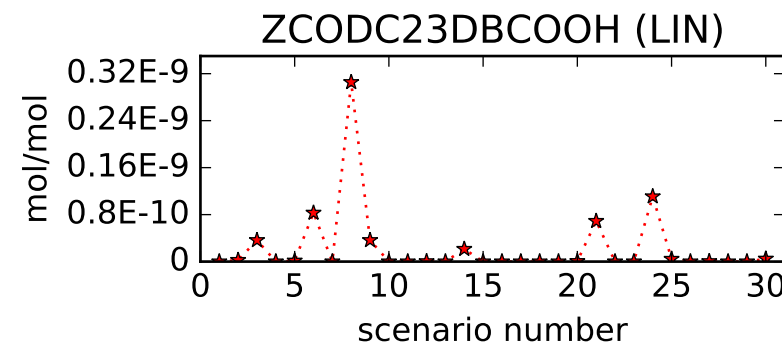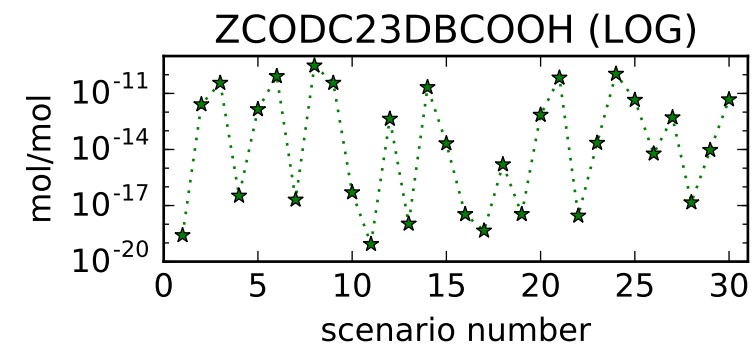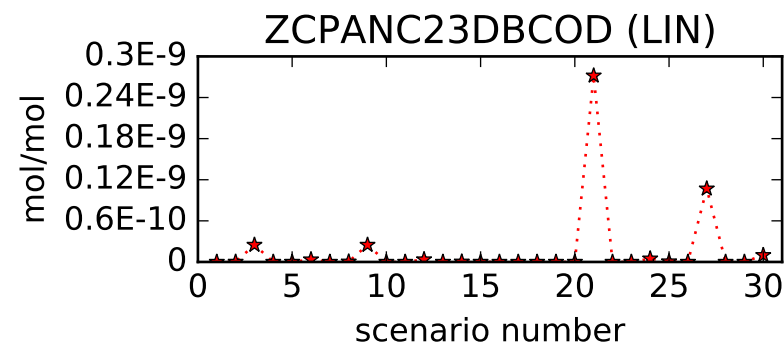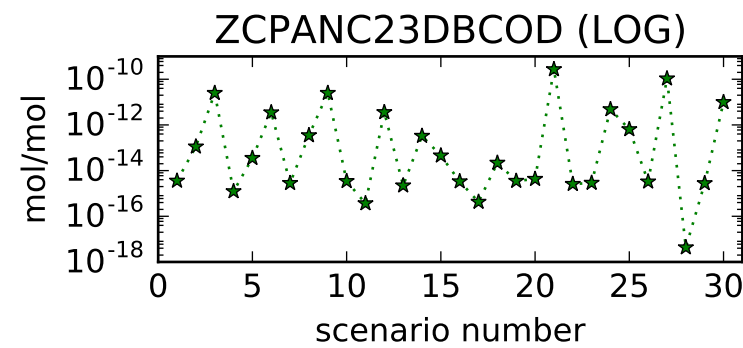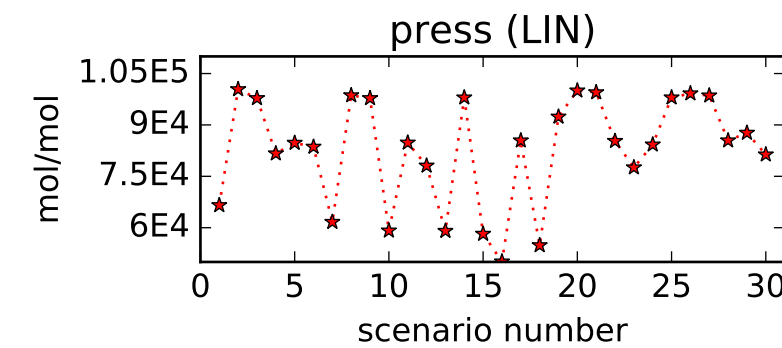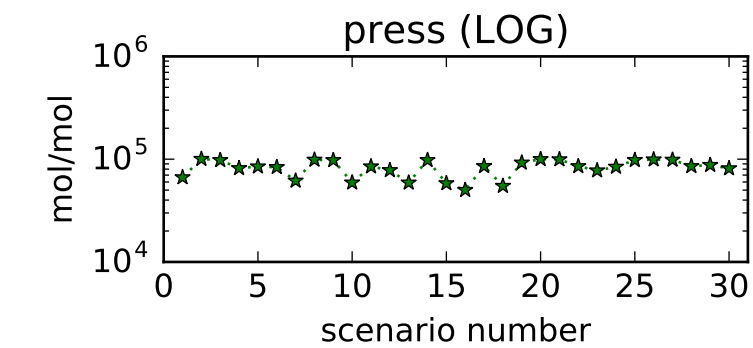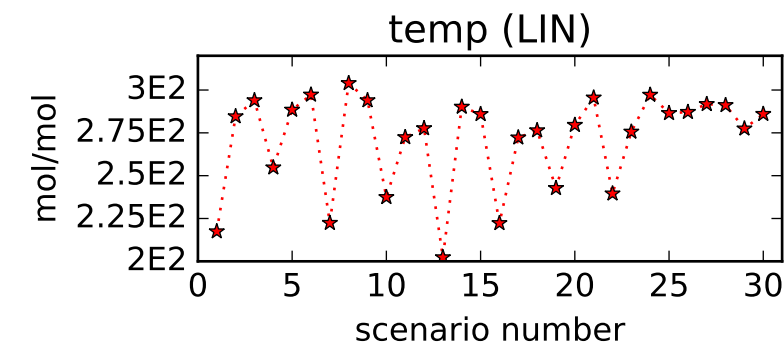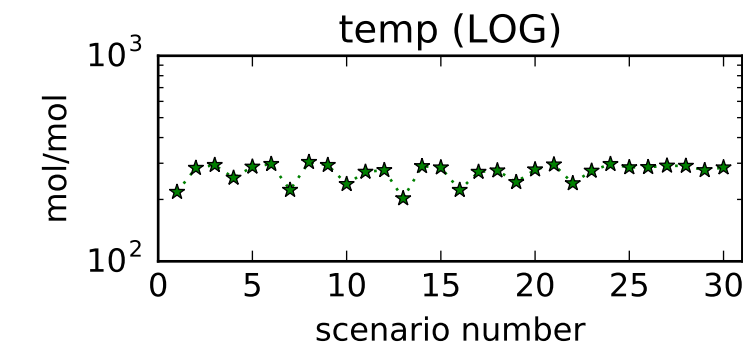

Supplement: Supplementary file 16 [file acp-21-3371-2021-supplement.zip]
