# Supplementary material for: Halogen activation in the plume of Masaya volcano: field observations and box model investigations
Source: Copernicus journal article supplement (doi:10.5194/acp-21-3371-2021), 2021-03-04
Supplement: Supplementary file 3 [file acp-21-3371-2021-supplement.zip]

# C4 chemistry
