# Supplementary material for: Halogen activation in the plume of Masaya volcano: field observations and box model investigations
Source: Copernicus journal article supplement (doi:10.5194/acp-21-3371-2021), 2021-03-04
Supplement: Supplementary file 6 [file acp-21-3371-2021-supplement.zip]

# Halogen activation in the plume of Masaya volcano: field observations and box model investigations

Julian Rüdiger<sup>1,10</sup>, Alexandra Gutmann<sup>1</sup>, Nicole Bobrowski<sup>2,3</sup>, Marcello Liotta<sup>4</sup>, J. Maarten de Moor<sup>5</sup>, Rolf Sander<sup>3</sup>, Florian Dinger<sup>2,3</sup>, Jan-Lukas Tirpitz<sup>2</sup>, Martha Ibarra<sup>6</sup>, Armando Saballos<sup>6</sup>, María Martínez<sup>5</sup>, Elvis Mendoza<sup>6</sup>, Arnoldo Ferrufino<sup>6</sup>, John Stix<sup>7</sup>, Juan Valdés<sup>8</sup>, Jonathan M. Castro<sup>9</sup>, and Thorsten Hoffmann<sup>1</sup>

<sup>1</sup>Johannes Gutenberg-University, Institute of Inorganic and Analytical Chemistry, Mainz, Germany

<sup>2</sup>Institute for Environmental Physics, University of Heidelberg, Heidelberg, Germany

<sup>3</sup>Max-Planck Institute for Chemistry, Mainz, Germany

<sup>4</sup>Istituto Nazionale di Geofisica e Vulcanologia, Sezione di Palermo, Italy

<sup>5</sup>Observatorio Vulcanológico y Sismológico de Costa Rica Universidad Nacional, Heredia, Costa Rica

<sup>6</sup>Instituto Nicaragüense de Estudios Territoriales, Nicaragua

<sup>7</sup>Department of Earth and Planetary Sciences, McGill University, Montreal, Canada

<sup>8</sup>Laboratorio de Química de la Atmósfera, Universidad Nacional, Heredia, Costa Rica

<sup>9</sup>Institute of Geosciences, Johannes Gutenberg University Mainz, Mainz, Germany

<sup>10</sup>Chair of Environmental Chemistry and Air Research, Technical University Berlin, Berlin, Germany

*Correspondence to: Thorsten Hoffmann (t.hoffmann@uni-mainz.de)*

**Table S1:** Gas species used in the HSC model and the mixing ratio of the atmospheric background composition taken from (Roberts et al., 2014).

| Species                           | Mixing ratio | Species                            | Mixing ratio |
|-----------------------------------|--------------|------------------------------------|--------------|
| H <sub>2</sub> O(g)               | -            | Cl(g)                              | -            |
| Ar(g)                             | 0.0095       | I(g)                               | -            |
| N <sub>2</sub> (g)                | 0.78         | F(g)                               | -            |
| O <sub>2</sub> (g)                | 0.21         | BrO(g)                             | -            |
| CO <sub>2</sub> (g)               | 0.0004       | ClO(g)                             | -            |
| CH <sub>4</sub> (g)               | 1.70E-06     | IO(g)                              | -            |
| CO(g)                             | 1.5E-07      | O(g)                               | -            |
| O <sub>3</sub> (g)                | 6.40E-08     | Cl <sub>2</sub> (g)                | -            |
| OH(g)                             | 6.90E-13     | Br <sub>2</sub> (g)                | -            |
| H <sub>2</sub> O <sub>2</sub> (g) | -            | I <sub>2</sub> (g)                 | -            |
| HO <sub>2</sub> (g)               | 3.00E-11     | BrCl(g)                            | -            |
| NO(g)                             | 5.00E-11     | HOCl(g)                            | -            |
| NO <sub>2</sub> (g)               | 1.10E-10     | H <sub>2</sub> (g)                 | -            |
| HNO <sub>2</sub> (g)              | -            | H(g)                               | -            |
| NO <sub>3</sub> (g)               | 5.00E-14     | H <sub>2</sub> SO <sub>4</sub> (g) | -            |
| HNO <sub>3</sub> (g)              | -            | N <sub>2</sub> O(g)                | -            |
| N <sub>2</sub> O <sub>5</sub> (g) | -            | HNO(g)                             | -            |
| CH <sub>3</sub> OH(g)             | -            | OCIO(g)                            | -            |
| SO <sub>2</sub> (g)               | -            | HF(g)                              | -            |
| HCl(g)                            | -            | HI(g)                              | -            |
| HBr(g)                            | -            | Br(g)                              | -            |

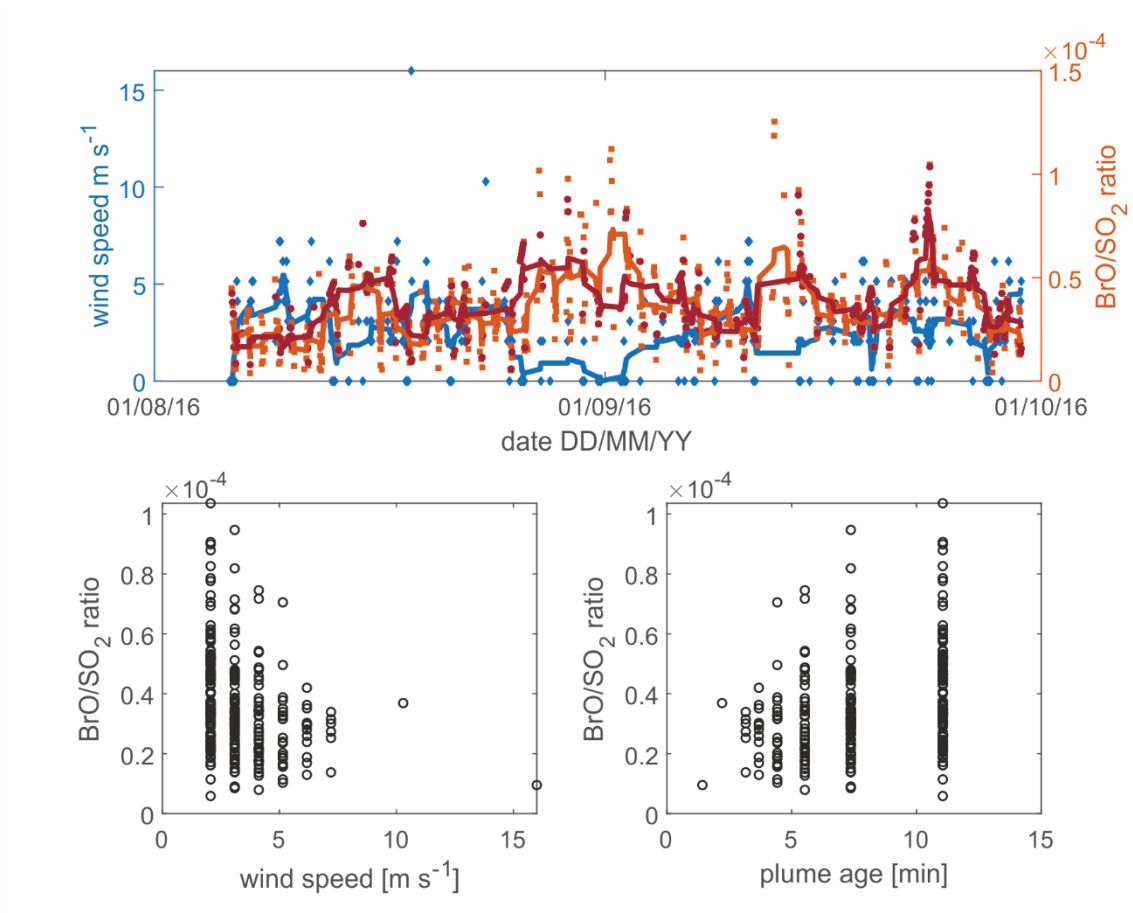

**Figure S1:** (a) Wind speed at the meteorological measurement station at Managua airport (blue) and  $\text{BrO/SO}_2$  mixing ratios at Masaya volcano (orange) and interpolated  $\text{BrO/SO}_2$  mixing ratios (red) at the time of wind speed measurements; (b)  $\text{BrO/SO}_2$  mixing ratio vs. wind speed and (c)  $\text{BrO/SO}_2$  mixing ratio vs. estimated plume age

### Selection of model scenarios to compare with field measurements

Multiple model runs were performed to further study the chemistry in volcanic plumes and investigate whether the field observations can be reproduced by theoretical predictions. For this, a combination of HSC high-temperature model and CAABA/MECCA atmospheric box model as explained in the text of the paper.

In order to simplify the selection of model scenarios that fit best with the observations, a computational procedure was chosen that compares the fit of model results for the progression of selected ratios (e.g.  $\text{BrX/Br}$  or  $\text{BrO/SO}_2$ ) with the fit of the respective field measurements data. To do so the data was fitted by a function that produces the shape of the progression in a way that it increases the ratios from low values (virtually zero) at the start of the model run to a specific value (e.g. 0.76 for  $\text{BrX/Br}$ ) at the plume age corresponding to the distance of the farthest sample location (2.8 km or approx. 9.3 minutes). For this, an exponential function was applied given by equation (1), with  $c$  being the average ratio measured (or modelled) at a distance of about 2.8 km or corresponding plume age:

$$f(x) = a * \exp(-b * x) + c \quad (\text{Eq. 1})$$

Figure S2 shows the selected model progressions with the corresponding measurement data.

without Br radical

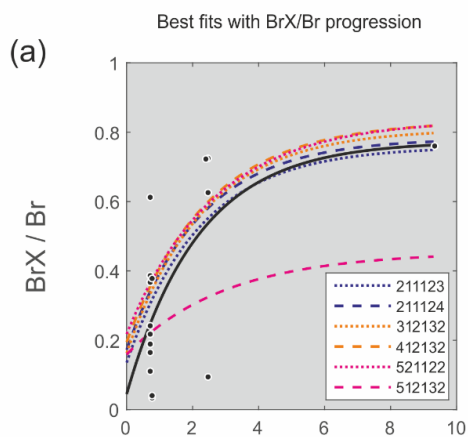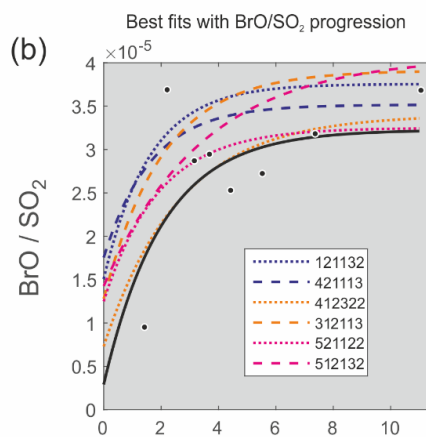

with Br radical

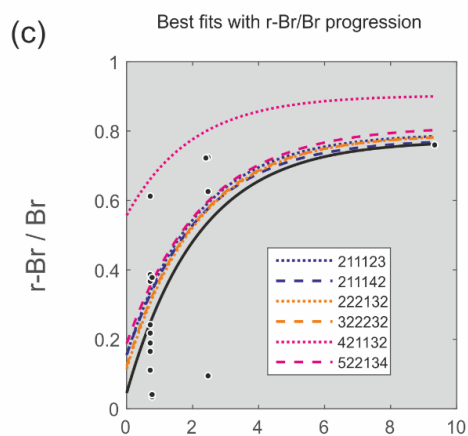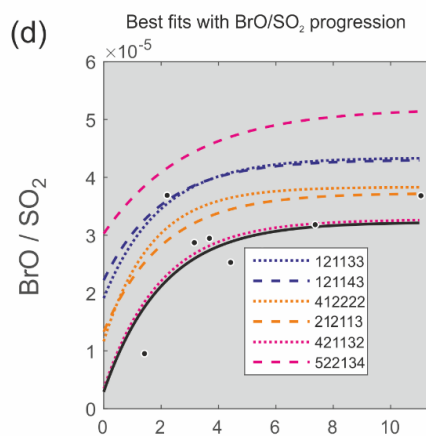

estimated plume age [min]

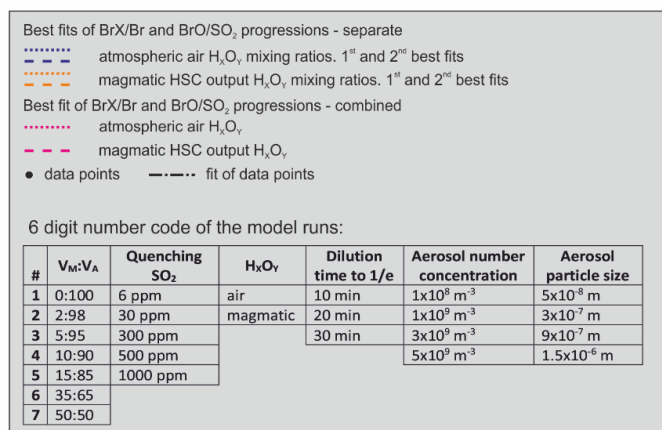

Figure S2: (a) BrX/Br samples (black circles), fit through the sample data points using  $f(x) = a \cdot \exp(-b \cdot x) + c$  (Eq. 1, see text) as a fit function (black line), fits of the closest model runs see description in legend (modelled BrX includes: Br<sub>2</sub>, BrCl, BrNO<sub>2</sub>, BrNO<sub>3</sub>, HOBr and BrO), (b) BrO/SO<sub>2</sub> median values for different plume ages and fits through measurement and model data using Eq. 1 similar to (a), (c) and (d) similar procedure as in (a) and (b), but modelled reactive Br species (r-Br) also include Br radicals.

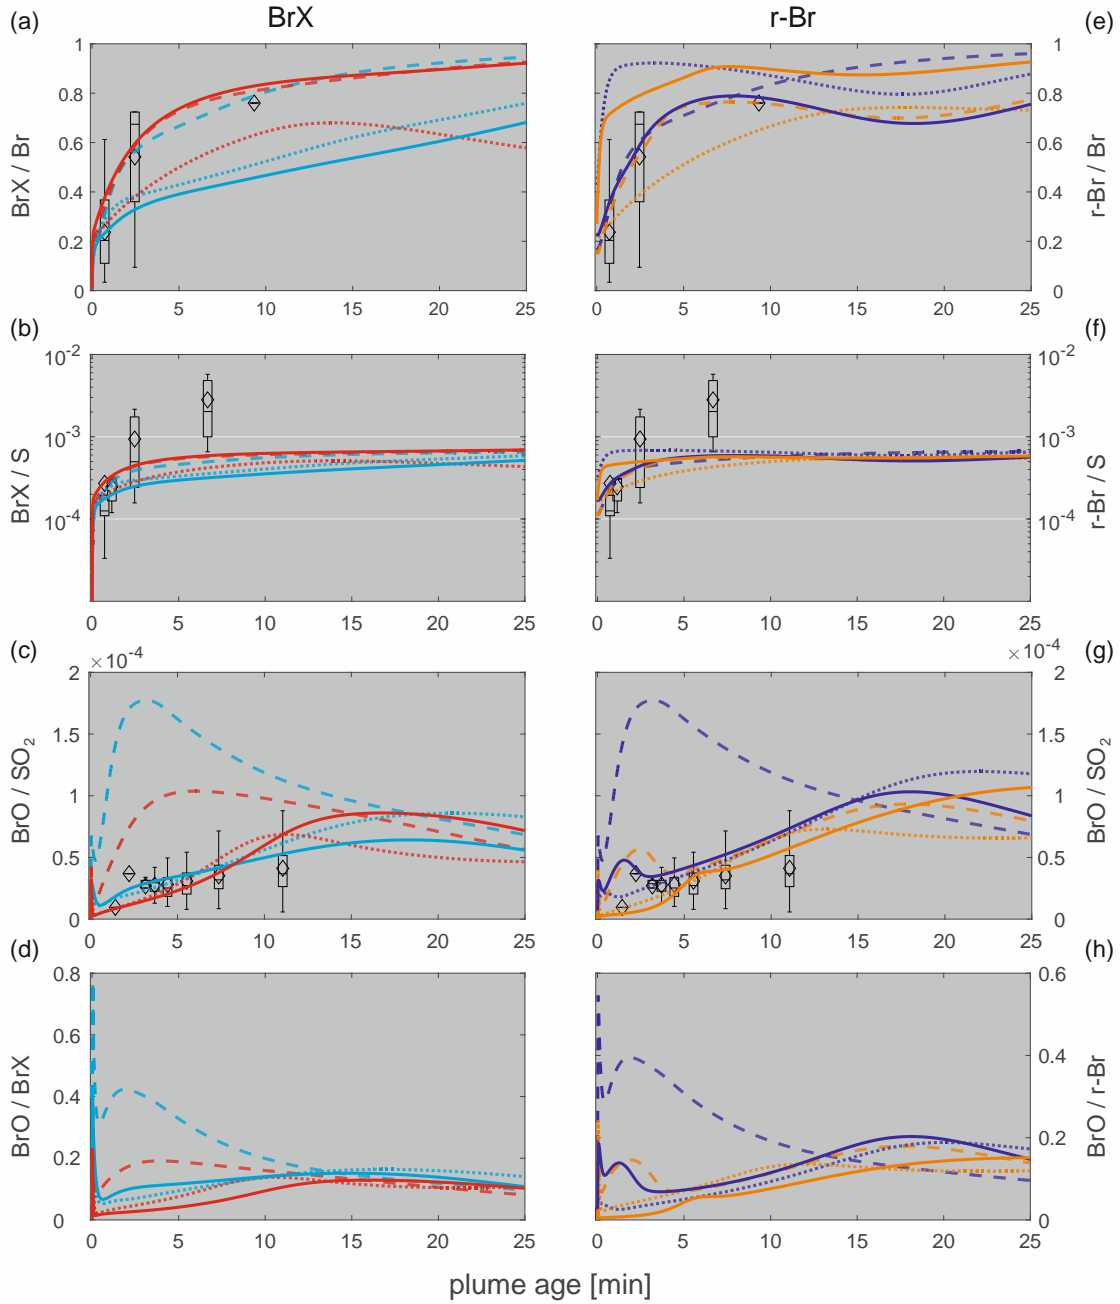

**Figure S3: Temporal evolution of different modelled bromine species ratios (molar) over the model time of 25 minutes with the respective measurement data (if available). Each sub figure shows the model runs that are closest to the measurement data, derived by the fit comparison approach described in section Fehler! Verweisquelle konnte nicht gefunden werden.. The legend provides the detailed model parameter ensembles for the respective plots. This figure is a supplemented version of Figure 6 providing the best fitting model runs r-Br/Br and BrX/Br.**

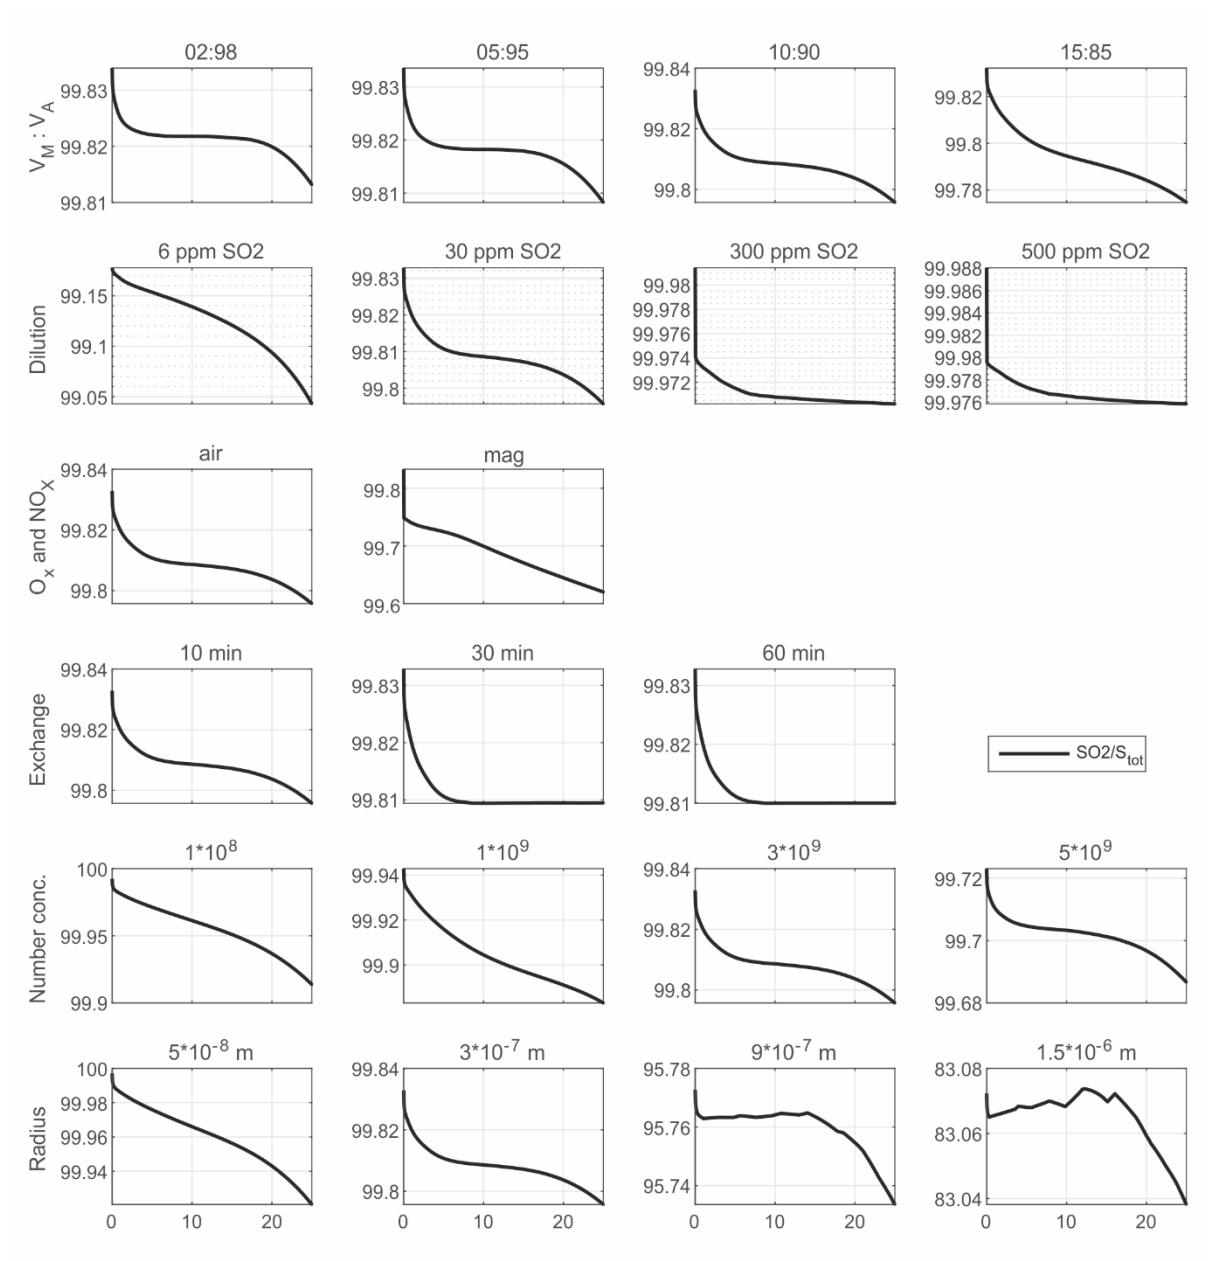

**Figure S4:  $\text{SO}_2$  over total sulfur for selected CAABA/MECCA model runs corresponding to Figure 8. Variations of the base run by changes of one parameter (horizontal rows).**

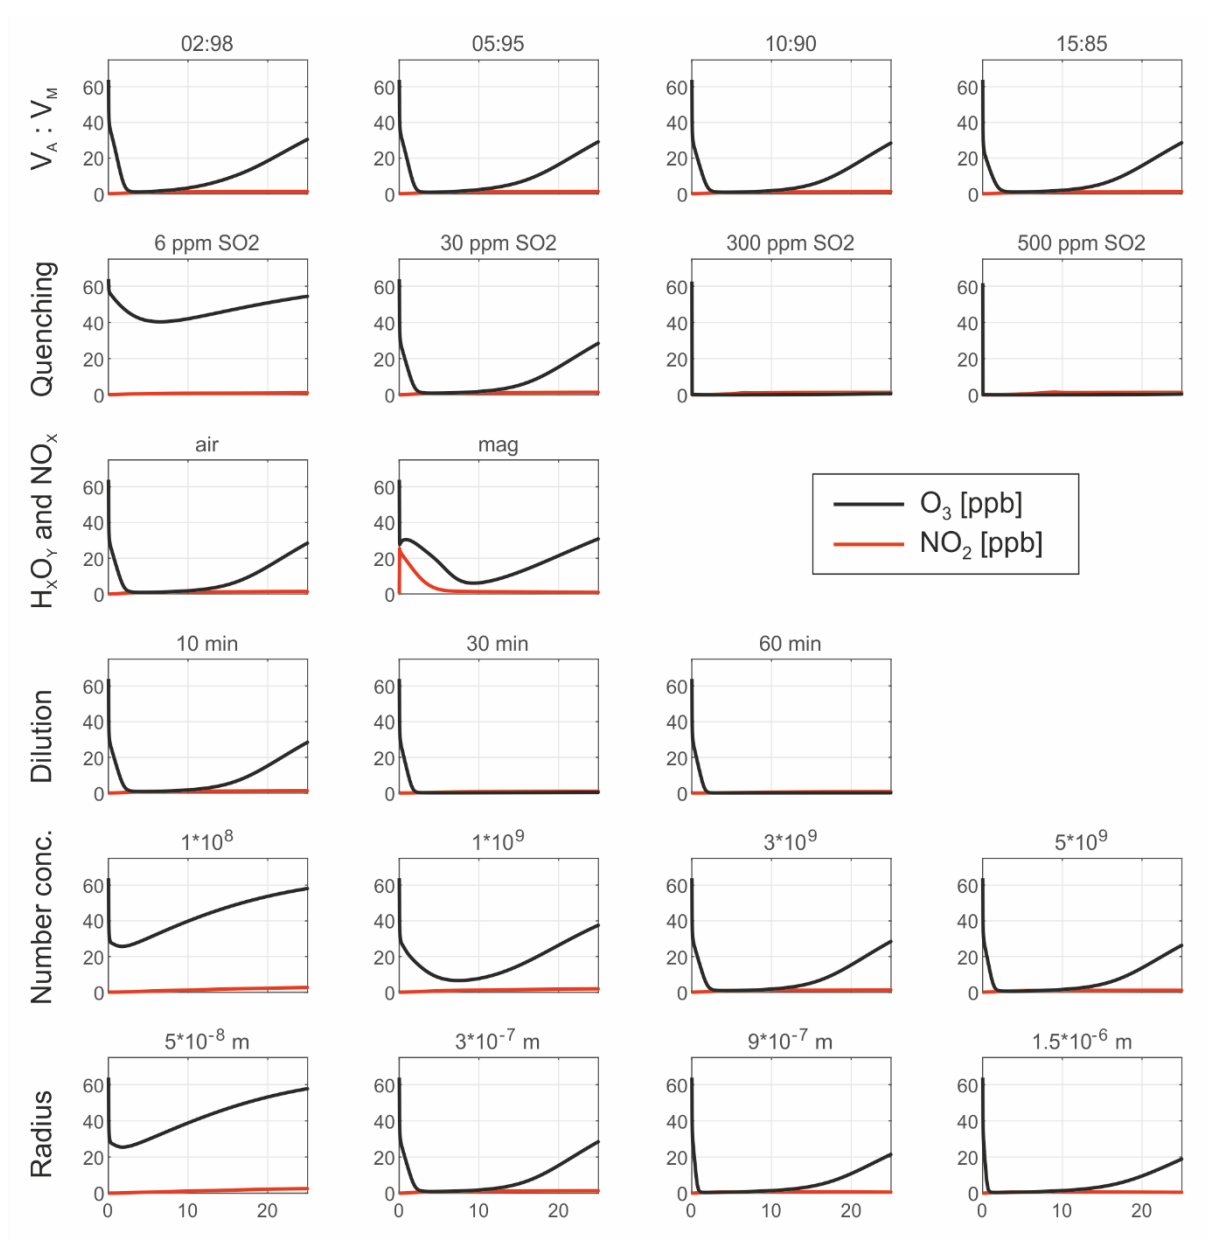

Figure S5:  $O_3$  and  $NO_2$  mixing ratios during the model runs in Figure 8. Variations of the base run by changes of one parameter (horizontal rows)

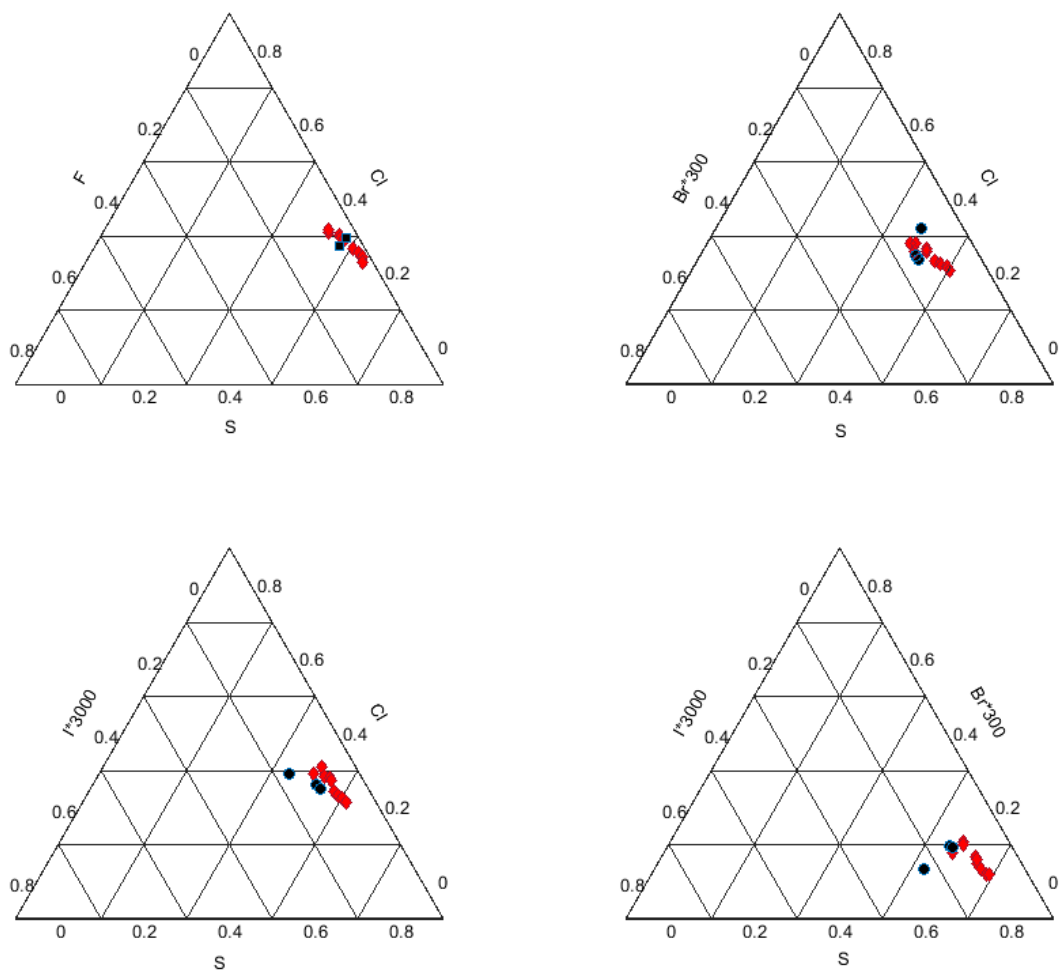

**Figure S6: Ternary plots of Halogen to Sulfur ratios; red diamonds: July samples, black circles: September samples**

**Table S2: Results of denuder, alkaline and electrochemical sensor measurements (G = ground, R = Raschig tube, D = Drechsel bottle, UAV = unmanned aerial vehicle, Type 1 = 1 M NaOH, 4 = 4 M NaOH). HalX (e.g., Br<sub>2</sub>, Cl<sub>2</sub> or BrCl) mixing ratios were derived from denuder samples with known volume of sampled plume gas; for certain alkaline trap samples the sampled volume is unknown and only a ratio of the respective halogen to sulfur was calculated from sample concentrations.**

| No. | Date       | Type | Location          | Distance [m] | S (SO <sub>2</sub> ) [ppm] | F [ppm]     | F/S               | Cl [ppm]    | Cl/S        | ClX [ppb]   | ClX/S             | ClX/Cl            | Br <sub>v</sub> [ppb] | Br/S                | BrX [ppb]   | BrX/S             | BrX/Br      | I [ppb]           | I/S               | IX [ppb]    | IX/S              | IX/I        |
|-----|------------|------|-------------------|--------------|----------------------------|-------------|-------------------|-------------|-------------|-------------|-------------------|-------------------|-----------------------|---------------------|-------------|-------------------|-------------|-------------------|-------------------|-------------|-------------------|-------------|
| 1   | 14.07.2016 | GR   | 1 Lookout (s)     | 231 ± 20     | 4.18 ± 0.22                | 0.12 ± 0.01 | 1.6E-01 ± 1.2E-02 | 3.24 ± 0.17 | 0.77 ± 0.06 |             |                   |                   | 3.72 ± 0.07           | 8.89E-04 ± 4.95E-05 |             |                   |             | 0.30 ± 0.07       | 7.2E-05 ± 1.8E-05 |             |                   |             |
| 2   | 14.07.2016 | GD   | 1 Pole            | 214 ± 20     | 0.71 ± 0.04                |             | 1.1E-01 ± 8.1E-03 | 0.53 ± 0.03 | 0.75 ± 0.06 | 0.17 ± 0.24 | 2.4E-04 ± 3.4E-04 | 3.2E-04 ± 4.6E-04 | 1.11 ± 0.06           | 1.57E-03 ± 1.14E-04 | 0.68 ± 0.15 | 9.6E-04 ± 2.2E-04 | 0.61 ± 0.14 | 0.06 ± 0.06       | 8.5E-05 ± 7.9E-05 | 0.11 ± 0.01 | 1.6E-04 ± 2.0E-05 |             |
| 3   | 14.07.2016 | GR   | 1 Pole            | 214 ± 20     |                            | 0.15 ± 0.01 | 1.8E-01 ± 1.3E-02 | 2.83 ± 0.15 | 0.80 ± 0.06 |             |                   |                   | 3.54 ± 0.06           | 1.00E-03 ± 5.48E-05 |             |                   |             | 0.18 ± 0.06       | 5.2E-05 ± 1.7E-05 |             |                   |             |
| 4   | 14.07.2016 | GD   | 1 Pole            | 214 ± 20     | 0.83 ± 0.04                |             | 5.6E-02 ± 4.0E-03 | 0.63 ± 0.03 | 0.76 ± 0.06 | 0.17 ± 0.24 | 2.1E-04 ± 3.0E-04 | 2.7E-04 ± 3.9E-04 | 1.85 ± 0.08           | 2.24E-03 ± 1.50E-04 | 0.68 ± 0.15 | 8.2E-04 ± 1.9E-04 | 0.37 ± 0.08 | 0.05 ± 0.08       | 5.6E-05 ± 9.5E-05 | 0.11 ± 0.01 | 1.4E-04 ± 1.7E-05 |             |
| 5   | 14.07.2016 | GD   | 4 Pole            | 214 ± 20     |                            | 0.52 ± 0.03 | 1.2E-01 ± 8.8E-03 |             | 0.90 ± 0.06 |             |                   |                   | 5.46E-04 ± 3.02E-05   |                     |             |                   |             | 6.2E-05 ± 7.4E-06 |                   |             |                   |             |
| 6   | 15.07.2016 | GR   | 1 Nindiri Rim     | 740 ± 50     | 1.13 ± 0.06                | 0.34 ± 0.02 | 3.8E-02 ± 2.7E-03 | 0.54 ± 0.03 | 0.48 ± 0.04 | 0.73 ± 0.18 | 6.5E-04 ± 1.6E-04 | 1.3E-03 ± 3.3E-04 | 0.77 ± 0.03           | 6.86E-04 ± 4.71E-05 | 0.56 ± 0.10 | 5.0E-04 ± 8.9E-05 | 0.72 ± 0.13 | 0.05 ± 0.03       | 4.7E-05 ± 3.1E-05 | 0.07 ± 0.01 | 5.9E-05 ± 7.0E-06 |             |
| 7   | 15.07.2016 | GR   | 1 Pole            | 214 ± 20     | 8.81 ± 0.46                |             | 1.0E-01 ± 7.1E-03 | 4.45 ± 0.23 | 0.51 ± 0.04 | 0.26 ± 0.26 | 3.0E-05 ± 3.0E-05 | 5.9E-05 ± 5.9E-05 | 4.44 ± 0.08           | 5.04E-04 ± 2.76E-05 | 1.71 ± 0.19 | 1.9E-04 ± 2.4E-05 | 0.39 ± 0.04 | 0.33 ± 0.08       | 3.8E-05 ± 8.8E-06 | 0.17 ± 0.02 | 1.9E-05 ± 2.1E-06 | 0.51 ± 0.13 |
| 8   | 15.07.2016 | GD   | 4 Pole            | 214 ± 20     |                            |             | 7.9E-02 ± 5.6E-03 |             | 0.72 ± 0.05 |             |                   |                   | 8.79E-04 ± 8.08E-05   |                     |             |                   |             | 7.2E-05 ± 2.5E-05 |                   |             |                   |             |
| 9   | 15.07.2016 | GD   | 4 Pole            | 214 ± 20     |                            |             |                   |             | 0.84 ± 0.06 |             |                   |                   | 7.74E-04 ± 4.32E-05   |                     |             |                   |             | 4.0E-05 ± 2.7E-06 |                   |             |                   |             |
| 10  | 16.07.2016 | GR   | 1 Nindiri Rim     | 740 ± 50     | 0.98 ± 0.05                | 0.37 ± 0.02 | 4.9E-02 ± 3.5E-03 | 1.32 ± 0.07 | 1.35 ± 0.10 |             |                   |                   | 1.62 ± 0.04           | 1.66E-03 ± 9.65E-05 | 0.15 ± 0.07 | 1.6E-04 ± 6.8E-05 | 0.09 ± 0.04 | 0.09 ± 0.04       | 9.6E-05 ± 4.3E-05 | 0.03 ± 0.00 | 2.6E-05 ± 4.3E-06 | 0.27 ± 0.13 |
| 11  | 16.07.2016 | GR   | 1 Pole            | 214 ± 20     | 7.56 ± 0.39                |             |                   | 4.54 ± 0.24 | 0.60 ± 0.04 |             |                   |                   | 4.97 ± 0.10           | 6.57E-04 ± 3.66E-05 |             |                   |             | 0.36 ± 0.10       | 4.7E-05 ± 1.3E-05 |             |                   |             |
| 12  | 17.07.2016 | UAV  | Caldera Valley    | 1989 ± 100   | 1.92 ± 0.09                |             |                   |             |             |             |                   |                   |                       |                     | 1.26 ± 0.69 | 6.6E-04 ± 3.6E-04 |             |                   |                   | 0.18 ± 0.04 | 9.5E-05 ± 2.2E-05 |             |
| 13  | 18.07.2016 | GR   | 1 Nindiri Rim     | 740 ± 50     | 0.74 ± 0.04                | 0.10 ± 0.01 | 2.7E-02 ± 1.9E-03 | 1.70 ± 0.09 | 2.30 ± 0.17 |             |                   |                   | 1.31 ± 0.03           | 1.78E-03 ± 9.89E-05 |             |                   |             | 0.05 ± 0.03       | 6.9E-05 ± 3.5E-05 | 0.03 ± 0.00 | 3.9E-05 ± 5.2E-06 | 0.57 ± 0.30 |
| 14  | 18.07.2016 | GR   | 1 Pole            | 214 ± 20     | 3.61 ± 0.19                |             |                   | 1.95 ± 0.10 | 0.54 ± 0.04 |             |                   |                   | 1.85 ± 0.04           | 5.11E-04 ± 2.86E-05 | 0.45 ± 0.06 | 1.2E-04 ± 1.7E-05 | 0.24 ± 0.03 | 0.15 ± 0.04       | 4.2E-05 ± 1.1E-05 | 0.09 ± 0.00 | 2.6E-05 ± 1.5E-06 | 0.62 ± 0.15 |
| 15  | 20.07.2016 | GR   | 1 Pole            | 214 ± 20     | 2.65 ± 0.14                | 0.09 ± 0.01 | 3.3E-02 ± 2.3E-03 | 1.51 ± 0.08 | 0.57 ± 0.04 |             |                   |                   | 1.55 ± 0.03           | 5.84E-04 ± 3.28E-05 | 0.34 ± 0.05 | 1.3E-04 ± 2.1E-05 | 0.22 ± 0.03 | 0.12 ± 0.03       | 4.5E-05 ± 1.3E-05 | 0.08 ± 0.01 | 3.1E-05 ± 2.6E-06 | 0.70 ± 0.20 |
| 16  | 20.07.2016 | GR   | 1 Nindiri Rim     | 740 ± 50     | 0.96 ± 0.05                |             |                   | 0.89 ± 0.05 | 0.93 ± 0.07 |             |                   |                   | 1.22 ± 0.03           | 1.28E-03 ± 7.30E-05 |             |                   |             | 0.06 ± 0.03       | 6.6E-05 ± 3.0E-05 | 0.02 ± 0.00 | 2.0E-05 ± 3.0E-06 | 0.31 ± 0.15 |
| 17  | 20.07.2016 | UAV  | Caldera Valley    | 1896 ± 100   | 0.51 ± 0.05                |             |                   |             |             |             |                   |                   |                       |                     | 2.91 ± 0.75 | 5.7E-03 ± 1.6E-03 |             |                   |                   | 0.08 ± 0.03 | 1.5E-04 ± 6.4E-05 |             |
| 18  | 20.07.2016 | UAV  | Caldera Valley    | 2122 ± 100   | 0.59 ± 0.05                |             |                   |             |             |             |                   |                   | 1.19 ± 0.62           | 2.0E-03 ± 1.1E-03   |             |                   |             |                   |                   | 0.06 ± 0.03 | 1.1E-04 ± 5.1E-05 |             |
| 19  | 21.07.2016 | GR   | 1 Nindiri Rim     | 740 ± 50     | 2.74 ± 0.14                | 0.29 ± 0.01 | 7.0E-02 ± 5.0E-03 | 2.00 ± 0.10 | 0.73 ± 0.05 |             |                   |                   | 2.56 ± 0.06           | 9.33E-04 ± 5.27E-05 |             |                   |             | 0.17 ± 0.06       | 6.3E-05 ± 2.1E-05 |             |                   |             |
| 20  | 21.07.2016 | GR   | 1 Nindiri Rim     | 740 ± 50     | 1.61 ± 0.08                | 0.56 ± 0.03 | 7.3E-02 ± 5.1E-03 | 1.46 ± 0.08 | 0.91 ± 0.07 |             |                   |                   | 1.81 ± 0.04           | 1.12E-03 ± 6.34E-05 |             |                   |             | 0.09 ± 0.04       | 5.7E-05 ± 2.5E-05 |             |                   |             |
| 21  | 21.07.2016 | GR   | 1 Pole            | 214 ± 20     | 4.06 ± 0.21                |             | 1.1E-01 ± 8.1E-03 | 2.76 ± 0.14 | 0.68 ± 0.05 |             |                   |                   | 3.05 ± 0.05           | 7.52E-04 ± 4.10E-05 |             |                   |             | 0.19 ± 0.05       | 4.6E-05 ± 1.2E-05 |             |                   |             |
| 22  | 21.07.2016 | GR   | 1 Pole            | 214 ± 20     | 7.67 ± 0.40                |             | 1.1E-01 ± 7.5E-03 | 5.36 ± 0.28 | 0.70 ± 0.05 |             |                   |                   | 5.57 ± 0.55           | 7.26E-04 ± 8.07E-05 | 0.92 ± 0.08 | 1.2E-04 ± 1.2E-05 | 0.17 ± 0.02 | 0.34 ± 0.55       | 4.4E-05 ± 7.1E-05 | 0.11 ± 0.01 | 1.4E-05 ± 1.2E-06 | 0.32 ± 0.52 |
| 23  | 21.07.2016 | GD   | 1 Pole            | 214 ± 20     |                            | 0.20 ± 0.01 | 7.4E-02 ± 5.2E-03 |             | 0.63 ± 0.04 |             |                   |                   | 6.16E-04 ± 3.09E-05   |                     |             |                   |             |                   | 4.9E-05 ± 2.5E-06 |             |                   |             |
| 24  | 21.07.2016 | GD   | 1 Pole            | 214 ± 20     |                            | 0.14 ± 0.01 | 8.4E-02 ± 6.0E-03 |             | 0.84 ± 0.06 |             |                   |                   | 1.24E-03 ± 6.86E-05   |                     |             |                   |             |                   | 9.2E-05 ± 4.8E-06 |             |                   |             |
| 25  | 22.07.2016 | GR   | 1 Lookout (s)     | 231 ± 20     | 6.01 ± 0.31                | 0.46 ± 0.02 | 7.6E-02 ± 5.4E-03 | 4.34 ± 0.23 | 0.72 ± 0.05 |             |                   |                   | 5.86 ± 0.11           | 9.75E-04 ± 5.38E-05 | 0.20 ± 0.07 | 3.3E-05 ± 1.1E-05 | 0.03 ± 0.01 | 0.32 ± 0.11       | 5.3E-05 ± 1.8E-05 | 0.05 ± 0.01 | 8.7E-06 ± 1.0E-06 | 0.16 ± 0.06 |
| 26  | 22.07.2016 | GR   | 1 Lookout (s)     | 231 ± 20     | 6.01 ± 0.31                |             |                   | 4.34 ± 0.23 | 0.72 ± 0.05 |             |                   |                   | 5.86 ± 0.11           | 9.75E-04 ± 5.38E-05 | 0.24 ± 0.07 | 4.0E-05 ± 1.2E-05 | 0.04 ± 0.01 | 0.32 ± 0.11       | 5.3E-05 ± 1.8E-05 | 0.06 ± 0.01 | 1.0E-05 ± 1.1E-06 | 0.19 ± 0.07 |
| 27  | 01.09.2016 | GR   | 1 Pole            | 214 ± 20     | 5.16 ± 0.27                | 0.52 ± 0.03 | 1.0E-01 ± 7.2E-03 | 3.35 ± 0.17 | 0.65 ± 0.05 | 1.16 ± 0.21 | 2.2E-04 ± 4.3E-05 | 3.5E-04 ± 6.5E-05 | 4.97 ± 0.08           | 9.63E-04 ± 5.27E-05 | 0.94 ± 0.10 | 1.8E-04 ± 2.2E-05 | 0.19 ± 0.02 | 0.36 ± 0.08       | 7.0E-05 ± 1.7E-05 | 0.12 ± 0.01 | 2.3E-05 ± 2.1E-06 | 0.32 ± 0.08 |
| 28  | 02.09.2016 | GR   | 1 San Pedro Rim   | 720 ± 50     |                            |             |                   |             | 0.07 ± 0.10 |             |                   |                   | 0.35 ± 0.02           |                     | 0.26 ± 0.05 |                   |             |                   |                   |             |                   |             |
| 29  | 03.09.2016 | GR   | 1 Nindiri Rim     | 740 ± 50     | 0.22 ± 0.01                | 0.17 ± 0.01 | 5.0E-02 ± 3.6E-03 | 0.64 ± 0.03 | 2.94 ± 0.22 | 0.55 ± 0.12 | 2.5E-03 ± 5.7E-04 | 8.5E-04 ± 1.9E-04 | 0.75 ± 0.02           | 3.45E-03 ± 2.07E-04 | 0.47 ± 0.06 | 2.2E-03 ± 3.0E-04 | 0.63 ± 0.08 | 0.05 ± 0.02       | 2.4E-04 ± 1.0E-04 | 0.01 ± 0.00 | 4.0E-05 ± 1.2E-05 | 0.17 ± 0.09 |
| 30  | 03.09.2016 | GR   | 1 Pole            | 214 ± 20     | 3.31 ± 0.17                |             |                   | 2.27 ± 0.12 | 0.69 ± 0.05 | 0.20 ± 0.12 | 6.1E-05 ± 3.7E-05 | 8.9E-05 ± 5.4E-05 | 3.27 ± 0.26           | 9.89E-04 ± 9.28E-05 | 0.36 ± 0.06 | 1.1E-04 ± 2.0E-05 | 0.11 ± 0.02 | 0.24 ± 0.26       | 7.3E-05 ± 7.7E-05 | 0.06 ± 0.00 | 1.9E-05 ± 1.8E-06 | 0.25 ± 0.27 |
| 31  | 03.09.2016 | UAV  | Nindiri Crater    | 351 ± 50     | 3.32 ± 0.14                |             |                   |             |             | 1.42 ± 1.71 | 4.3E-04 ± 5.2E-04 |                   |                       |                     | 1.04 ± 0.76 | 3.1E-04 ± 2.3E-04 |             |                   |                   |             |                   |             |
| 32  | 03.09.2016 | UAV  | Nindiri Crater    | 337 ± 50     | 11.04 ± 0.29               |             |                   |             |             | 2.48 ± 1.35 | 2.2E-04 ± 1.2E-04 |                   |                       |                     | 3.36 ± 0.77 | 3.0E-04 ± 7.0E-05 |             |                   |                   | 0.11 ± 0.03 | 9.8E-06 ± 2.8E-06 |             |
| 33  | 03.09.2016 | UAV  | Nindiri Crater    | 337 ± 50     | 11.04 ± 0.29               |             |                   |             |             |             |                   |                   |                       |                     | 1.32 ± 0.55 | 1.2E-04 ± 5.0E-05 |             |                   |                   | 0.13 ± 0.03 | 1.1E-05 ± 2.8E-06 |             |
| 34  | 04.09.2016 | GR   | 1 Nindiri Rim     | 740 ± 50     | 0.31 ± 0.02                |             |                   | 1.02 ± 0.05 | 3.27 ± 0.24 |             |                   |                   | 1.08 ± 0.02           | 3.45E-03 ± 1.88E-04 |             |                   |             | 0.05 ± 0.02       | 1.6E-04 ± 5.7E-05 |             |                   |             |
| 35  | 04.09.2016 | GR   | 1 Lookout (night) | 231 ± 20     | 0.85 ± 0.04                |             |                   | 0.75 ± 0.04 | 0.88 ± 0.06 | 7.58 ± 0.83 | 8.9E-03 ± 1.1E-03 | 1.0E-02 ± 1.2E-03 | 0.60 ± 0.06           | 7.01E-04 ± 7.59E-05 | 0.23 ± 0.07 | 2.7E-04 ± 8.7E-05 | 0.38 ± 0.13 | 0.11 ± 0.06       | 1.2E-04 ± 6.7E-05 | 0.04 ± 0.00 | 4.3E-05 ± 5.5E-06 | 0.35 ± 0.19 |
| 36  | 05.09.2016 | GR   | 1 Cerro Ventarrón | 2800 ± 200   |                            |             |                   |             |             | 0.75 ± 0.13 |                   |                   | 0.29 ± 0.02           |                     | 0.22 ± 0.05 |                   | 0.76 ± 0.20 | 0.03 ± 0.02       |                   | 0.02 ± 0.00 |                   | 0.92 ± 0.67 |



**Table S3: Overview on the HSC output and species and their mixing ratios at different volume ratios of atmospheric and magmatic gas at 1000°C**

| Temperature | 1000°C   |          |          |          |          |          |          |          |
|-------------|----------|----------|----------|----------|----------|----------|----------|----------|
| VA:VM       | 0:100    | 1:99     | 2:98     | 5:95     | 10:90    | 15:85    | 35:65    | 50:50    |
| H2O(g)      | 9.30E-01 | 9.21E-01 | 9.11E-01 | 8.83E-01 | 8.37E-01 | 7.90E-01 | 3.25E-01 | 4.65E-01 |
| N2(g)       | 0.00E+00 | 7.80E-03 | 1.56E-02 | 3.90E-02 | 7.80E-02 | 1.17E-01 | 5.07E-01 | 3.90E-01 |
| O2(g)       | 6.43E-06 | 2.04E-03 | 4.12E-03 | 1.04E-02 | 2.08E-02 | 3.13E-02 | 1.37E-01 | 1.05E-01 |
| CO2(g)      | 4.39E-02 | 4.34E-02 | 4.30E-02 | 4.17E-02 | 3.95E-02 | 3.74E-02 | 1.56E-02 | 2.21E-02 |
| CH4(g)      | 1.37E-24 | 1.32E-29 | 3.14E-30 | 4.52E-31 | 9.53E-32 | 3.56E-32 | 1.32E-34 | 6.51E-34 |
| CO(g)       | 1.53E-06 | 8.48E-08 | 5.92E-08 | 3.62E-08 | 2.42E-08 | 1.87E-08 | 3.73E-09 | 6.04E-09 |
| O3(g)       | 6.55E-18 | 3.72E-14 | 1.07E-13 | 4.25E-13 | 1.21E-12 | 2.23E-12 | 2.03E-11 | 1.36E-11 |
| CH3OH(g)    | 1.14E-24 | 1.95E-28 | 6.61E-29 | 1.51E-29 | 4.51E-30 | 2.07E-30 | 1.60E-32 | 6.91E-32 |
| SO2(g)      | 1.49E-02 | 1.47E-02 | 1.45E-02 | 1.40E-02 | 1.31E-02 | 1.24E-02 | 4.95E-03 | 7.12E-03 |
| HCl(g)      | 1.03E-02 | 1.02E-02 | 1.01E-02 | 9.76E-03 | 9.25E-03 | 8.73E-03 | 3.59E-03 | 5.13E-03 |
| HBr(g)      | 1.06E-05 | 9.11E-06 | 8.75E-06 | 8.07E-06 | 7.24E-06 | 6.59E-06 | 1.98E-06 | 3.16E-06 |
| HF(g)       | 1.05E-03 | 1.04E-03 | 1.03E-03 | 9.99E-04 | 9.46E-04 | 8.93E-04 | 3.68E-04 | 5.26E-04 |
| HI(g)       | 3.22E-08 | 7.64E-09 | 6.30E-09 | 4.76E-09 | 3.67E-09 | 3.03E-09 | 5.58E-10 | 1.01E-09 |
| Br(g)       | 4.77E-07 | 1.75E-06 | 2.01E-06 | 2.37E-06 | 2.61E-06 | 2.70E-06 | 1.83E-06 | 2.28E-06 |
| Cl(g)       | 1.42E-06 | 5.95E-06 | 7.06E-06 | 8.74E-06 | 1.01E-05 | 1.09E-05 | 1.01E-05 | 1.13E-05 |
| I(g)        | 6.57E-07 | 6.62E-07 | 6.54E-07 | 6.31E-07 | 5.95E-07 | 5.60E-07 | 2.33E-07 | 3.30E-07 |
| F(g)        | 6.34E-13 | 2.66E-12 | 3.16E-12 | 3.92E-12 | 4.54E-12 | 4.88E-12 | 4.53E-12 | 5.07E-12 |
| BrO(g)      | 1.66E-12 | 1.09E-10 | 1.78E-10 | 3.33E-10 | 5.17E-10 | 6.58E-10 | 9.29E-10 | 1.02E-09 |
| ClO(g)      | 1.13E-10 | 8.45E-09 | 1.43E-08 | 2.80E-08 | 4.59E-08 | 6.05E-08 | 1.17E-07 | 1.15E-07 |
| IO(g)       | 1.39E-12 | 2.49E-11 | 3.49E-11 | 5.35E-11 | 7.14E-11 | 8.25E-11 | 7.15E-11 | 8.89E-11 |
| Cl2(g)      | 2.12E-08 | 3.75E-07 | 5.28E-07 | 8.09E-07 | 1.09E-06 | 1.26E-06 | 1.08E-06 | 1.35E-06 |
| Br2(g)      | 4.34E-11 | 5.84E-10 | 7.71E-10 | 1.07E-09 | 1.29E-09 | 1.39E-09 | 6.35E-10 | 9.92E-10 |
| I2(g)       | 2.62E-12 | 2.65E-12 | 2.59E-12 | 2.41E-12 | 2.14E-12 | 1.90E-12 | 3.27E-13 | 6.60E-13 |
| BrCl(g)     | 2.05E-09 | 3.16E-08 | 4.31E-08 | 6.30E-08 | 8.01E-08 | 8.93E-08 | 5.59E-08 | 7.81E-08 |
| HOCl(g)     | 6.56E-09 | 1.16E-07 | 1.63E-07 | 2.50E-07 | 3.36E-07 | 3.89E-07 | 3.34E-07 | 4.17E-07 |
| H2(g)       | 1.91E-05 | 1.06E-06 | 7.41E-07 | 4.52E-07 | 3.03E-07 | 2.33E-07 | 4.59E-08 | 7.50E-08 |
| H(g)        | 3.16E-09 | 7.44E-10 | 6.21E-10 | 4.86E-10 | 3.97E-10 | 3.49E-10 | 1.55E-10 | 1.98E-10 |
| H2SO4(g)    | 7.94E-09 | 1.38E-07 | 1.91E-07 | 2.84E-07 | 3.58E-07 | 3.91E-07 | 1.34E-07 | 2.42E-07 |
| OCIO(g)     | 9.98E-14 | 9.27E-14 | 2.22E-13 | 6.92E-13 | 1.61E-12 | 2.60E-12 | 1.05E-11 | 8.99E-12 |
| OH(g)       | 1.73E-06 | 7.27E-06 | 8.62E-06 | 1.07E-05 | 1.24E-05 | 1.33E-05 | 1.24E-05 | 1.38E-05 |
| H2O2(g)     | 1.06E-10 | 1.87E-09 | 2.63E-09 | 4.04E-09 | 5.42E-09 | 6.28E-09 | 5.39E-09 | 6.75E-09 |
| HO2(g)      | 9.80E-11 | 7.34E-09 | 1.24E-08 | 2.43E-08 | 3.99E-08 | 5.27E-08 | 1.02E-07 | 9.99E-08 |
| O(g)        | 2.73E-10 | 4.88E-09 | 6.93E-09 | 1.10E-08 | 1.56E-08 | 1.91E-08 | 3.99E-08 | 3.49E-08 |
| NO(g)       | 0.00E+00 | 3.56E-06 | 7.15E-06 | 1.79E-05 | 3.59E-05 | 5.40E-05 | 2.35E-04 | 1.80E-04 |
| NO2(g)      | 0.00E+00 | 4.34E-09 | 1.24E-08 | 4.93E-08 | 1.40E-07 | 2.58E-07 | 2.34E-06 | 1.57E-06 |
| NO3(g)      | 0.00E+00 | 1.30E-16 | 5.29E-16 | 3.34E-15 | 1.34E-14 | 3.03E-14 | 5.75E-13 | 3.38E-13 |
| HNO3(g)     | 0.00E+00 | 5.18E-14 | 1.75E-13 | 8.66E-13 | 2.85E-12 | 5.64E-12 | 4.75E-11 | 3.57E-11 |
| N2O5(g)     | 0.00E+00 | 1.75E-28 | 2.03E-27 | 5.09E-26 | 5.81E-25 | 2.41E-24 | 4.16E-22 | 1.65E-22 |
| N2O(g)      | 0.00E+00 | 2.18E-11 | 6.19E-11 | 2.46E-10 | 6.96E-10 | 1.28E-09 | 1.16E-08 | 7.80E-09 |
| HNO(g)      | 0.00E+00 | 1.13E-12 | 1.90E-12 | 3.72E-12 | 6.09E-12 | 8.03E-12 | 1.55E-11 | 1.52E-11 |
| HNO2(g)     | 0.00E+00 | 3.00E-10 | 7.15E-10 | 2.23E-09 | 5.16E-09 | 8.34E-09 | 3.36E-08 | 2.89E-08 |

|           |          |          |          |          |          |          |          |          |
|-----------|----------|----------|----------|----------|----------|----------|----------|----------|
| Ar(g)     | 0.00E+00 | 1.00E-04 | 2.00E-04 | 5.00E-04 | 1.00E-03 | 1.50E-03 | 6.50E-03 | 5.00E-03 |
| BrBrO(g)  | 4.38E-21 | 1.05E-18 | 1.97E-18 | 4.35E-18 | 7.43E-18 | 9.79E-18 | 9.34E-18 | 1.28E-17 |
| BrF(g)    | 9.89E-15 | 1.52E-13 | 2.08E-13 | 3.04E-13 | 3.86E-13 | 4.31E-13 | 2.71E-13 | 3.78E-13 |
| BrOBr(g)  | 9.20E-20 | 2.20E-17 | 4.14E-17 | 9.14E-17 | 1.56E-16 | 2.06E-16 | 1.96E-16 | 2.68E-16 |
| BrOO(g)   | 6.85E-17 | 7.98E-14 | 1.85E-13 | 5.50E-13 | 1.21E-12 | 1.89E-12 | 5.57E-12 | 5.33E-12 |
| CH3(g)    | 4.53E-27 | 1.84E-31 | 5.26E-32 | 9.68E-33 | 2.50E-33 | 1.06E-33 | 8.87E-36 | 3.43E-35 |
| Cl2O(g)   | 1.45E-17 | 4.57E-15 | 9.14E-15 | 2.22E-14 | 4.22E-14 | 5.98E-14 | 1.07E-13 | 1.17E-13 |
| ClClO(g)  | 0.00E+00 | 1.39E-14 | 2.77E-14 | 6.74E-14 | 1.28E-13 | 1.82E-13 | 3.25E-13 | 3.56E-13 |
| ClF(g)    | 2.30E-14 | 4.05E-13 | 5.71E-13 | 8.77E-13 | 1.18E-12 | 1.36E-12 | 1.17E-12 | 1.46E-12 |
| ClO2(g)   | 3.34E-17 | 4.47E-14 | 1.07E-13 | 3.33E-13 | 7.74E-13 | 1.25E-12 | 5.06E-12 | 4.33E-12 |
| ClOCl(g)  | 4.38E-17 | 1.38E-14 | 2.76E-14 | 6.70E-14 | 1.27E-13 | 1.81E-13 | 3.24E-13 | 3.54E-13 |
| ClOO(g)   | 3.30E-16 | 4.41E-13 | 1.06E-12 | 3.29E-12 | 7.65E-12 | 1.24E-11 | 5.00E-11 | 4.28E-11 |
| COCl(g)   | 1.46E-14 | 3.40E-15 | 2.81E-15 | 2.13E-15 | 1.65E-15 | 1.37E-15 | 2.53E-16 | 4.58E-16 |
| COCl2(g)  | 8.15E-17 | 7.98E-17 | 7.85E-17 | 7.34E-17 | 6.58E-17 | 5.88E-17 | 1.01E-17 | 2.04E-17 |
| COOH(g)   | 1.91E-13 | 4.45E-14 | 3.68E-14 | 2.79E-14 | 2.16E-14 | 1.80E-14 | 3.32E-15 | 6.02E-15 |
| COS(g)    | 1.40E-14 | 2.40E-18 | 8.17E-19 | 1.92E-19 | 5.99E-20 | 2.91E-20 | 5.31E-22 | 1.61E-21 |
| CS(g)     | 6.48E-25 | 6.24E-30 | 1.50E-30 | 2.21E-31 | 4.88E-32 | 1.93E-32 | 1.69E-34 | 5.86E-34 |
| CS2(g)    | 1.04E-27 | 3.10E-35 | 3.62E-36 | 1.00E-36 | 1.00E-36 | 1.00E-36 | 1.00E-36 | 1.00E-36 |
| H2S(g)    | 5.56E-12 | 9.56E-16 | 3.25E-16 | 7.63E-17 | 2.38E-17 | 1.15E-17 | 2.08E-19 | 6.37E-19 |
| H2S2(g)   | 3.71E-21 | 1.97E-27 | 3.28E-28 | 2.95E-29 | 4.31E-30 | 1.31E-30 | 2.16E-33 | 1.24E-32 |
| HCICO(g)  | 7.97E-17 | 4.38E-18 | 3.03E-18 | 1.79E-18 | 1.13E-18 | 8.26E-19 | 6.77E-20 | 1.57E-19 |
| HCN(g)    | 0.00E+00 | 1.72E-23 | 9.98E-24 | 4.75E-24 | 2.59E-24 | 1.76E-24 | 1.55E-25 | 3.21E-25 |
| HCO(g)    | 2.03E-17 | 2.65E-19 | 1.55E-19 | 7.38E-20 | 4.04E-20 | 2.74E-20 | 2.42E-21 | 5.01E-21 |
| HCOOH(g)  | 9.24E-13 | 5.07E-14 | 3.50E-14 | 2.08E-14 | 1.32E-14 | 9.59E-15 | 7.87E-16 | 1.82E-15 |
| HIO(g)    | 2.15E-09 | 9.10E-09 | 1.07E-08 | 1.28E-08 | 1.39E-08 | 1.41E-08 | 5.43E-09 | 8.63E-09 |
| HNCO(g)   | 0.00E+00 | 1.15E-18 | 9.47E-19 | 7.15E-19 | 5.53E-19 | 4.59E-19 | 8.46E-20 | 1.54E-19 |
| HS(g)     | 5.29E-13 | 3.86E-16 | 1.57E-16 | 4.72E-17 | 1.80E-17 | 9.94E-18 | 4.04E-19 | 9.69E-19 |
| HSO3Cl(g) | 3.23E-12 | 5.61E-11 | 7.77E-11 | 1.15E-10 | 1.45E-10 | 1.59E-10 | 5.44E-11 | 9.78E-11 |
| HSO3F(g)  | 2.30E-12 | 3.99E-11 | 5.54E-11 | 8.24E-11 | 1.04E-10 | 1.13E-10 | 3.89E-11 | 7.00E-11 |
| IBr(g)    | 0.00E+00 | 1.36E-10 | 1.55E-10 | 1.76E-10 | 1.82E-10 | 1.78E-10 | 4.99E-11 | 8.86E-11 |
| ICl(g)    | 1.74E-09 | 7.34E-09 | 8.61E-09 | 1.03E-08 | 1.12E-08 | 1.14E-08 | 4.37E-09 | 6.94E-09 |
| IF(g)     | 3.13E-13 | 1.32E-12 | 1.55E-12 | 1.86E-12 | 2.03E-12 | 2.06E-12 | 7.92E-13 | 1.26E-12 |
| IOO(g)    | 3.56E-17 | 1.14E-14 | 2.27E-14 | 5.52E-14 | 1.04E-13 | 1.48E-13 | 2.68E-13 | 2.91E-13 |
| N(g)      | 0.00E+00 | 5.80E-18 | 8.20E-18 | 1.30E-17 | 1.83E-17 | 2.25E-17 | 4.68E-17 | 4.10E-17 |
| N2O2(g)   | 0.00E+00 | 1.36E-18 | 5.51E-18 | 3.47E-17 | 1.39E-16 | 3.14E-16 | 5.93E-15 | 3.50E-15 |
| N2O3(g)   | 0.00E+00 | 4.72E-20 | 2.71E-19 | 2.70E-18 | 1.54E-17 | 4.25E-17 | 1.68E-15 | 8.66E-16 |
| NBr(g)    | 0.00E+00 | 3.68E-17 | 5.99E-17 | 1.12E-16 | 1.74E-16 | 2.20E-16 | 3.10E-16 | 3.40E-16 |
| NH2(g)    | 0.00E+00 | 1.74E-17 | 1.72E-17 | 1.66E-17 | 1.57E-17 | 1.48E-17 | 6.05E-18 | 8.68E-18 |
| NH2OH(g)  | 0.00E+00 | 8.53E-19 | 9.97E-19 | 1.19E-18 | 1.31E-18 | 1.33E-18 | 5.04E-19 | 8.09E-19 |
| NH3(g)    | 0.00E+00 | 1.40E-14 | 1.15E-14 | 8.69E-15 | 6.72E-15 | 5.56E-15 | 1.01E-15 | 1.85E-15 |
| NO2Cl(g)  | 0.00E+00 | 1.64E-15 | 5.54E-15 | 2.73E-14 | 8.97E-14 | 1.78E-13 | 1.50E-12 | 1.12E-12 |
| NOBr(g)   | 0.00E+00 | 5.88E-13 | 1.36E-12 | 4.02E-12 | 8.84E-12 | 1.38E-11 | 4.05E-11 | 3.88E-11 |
| NOCl(g)   | 0.00E+00 | 5.82E-11 | 1.39E-10 | 4.31E-10 | 9.99E-10 | 1.61E-09 | 6.50E-09 | 5.57E-09 |
| NOF(g)    | 0.00E+00 | 1.18E-14 | 2.80E-14 | 8.73E-14 | 2.02E-13 | 3.27E-13 | 1.32E-12 | 1.13E-12 |
| NOI(g)    | 0.00E+00 | 1.34E-14 | 2.67E-14 | 6.46E-14 | 1.22E-13 | 1.73E-13 | 3.11E-13 | 3.39E-13 |

|           |          |          |          |          |          |          |          |          |
|-----------|----------|----------|----------|----------|----------|----------|----------|----------|
| NS(g)     | 0.00E+00 | 1.82E-19 | 1.26E-19 | 7.64E-20 | 5.05E-20 | 3.88E-20 | 7.39E-21 | 1.22E-20 |
| OBrO(g)   | 1.33E-19 | 1.55E-16 | 3.60E-16 | 1.07E-15 | 2.35E-15 | 3.67E-15 | 1.08E-14 | 1.04E-14 |
| OIO(g)    | 1.05E-19 | 3.37E-17 | 6.71E-17 | 1.63E-16 | 3.09E-16 | 4.37E-16 | 7.92E-16 | 8.62E-16 |
| S(g)      | 3.84E-14 | 1.19E-16 | 5.80E-17 | 2.23E-17 | 1.04E-17 | 6.54E-18 | 5.98E-19 | 1.12E-18 |
| S2(g)     | 4.46E-16 | 4.27E-21 | 1.02E-21 | 1.50E-22 | 3.28E-23 | 1.29E-23 | 1.08E-25 | 3.82E-25 |
| S2Br2(g)  | 2.58E-27 | 3.32E-31 | 1.04E-31 | 2.15E-32 | 5.64E-33 | 2.39E-33 | 9.15E-36 | 5.04E-35 |
| S2Cl(g)   | 2.64E-20 | 1.07E-24 | 3.01E-25 | 5.50E-26 | 1.39E-26 | 5.89E-27 | 4.57E-29 | 1.80E-28 |
| S2Cl2(g)  | 5.62E-24 | 9.52E-28 | 3.19E-28 | 7.21E-29 | 2.11E-29 | 9.63E-30 | 6.92E-32 | 3.05E-31 |
| S2O(g)    | 5.38E-15 | 9.19E-19 | 3.11E-19 | 7.28E-20 | 2.25E-20 | 1.09E-20 | 1.90E-22 | 5.88E-22 |
| S3(g)     | 3.22E-25 | 9.57E-33 | 1.11E-33 | 6.30E-35 | 6.43E-36 | 1.59E-36 | 1.00E-36 | 1.00E-36 |
| S4(g)     | 2.89E-34 | 1.00E-36 |
| S5(g)     | 1.00E-36 |
| S6(g)     | 1.00E-36 |
| SBr2(g)   | 2.54E-17 | 1.06E-18 | 6.82E-19 | 3.65E-19 | 2.05E-19 | 1.39E-19 | 5.79E-21 | 1.70E-20 |
| SCl(g)    | 2.57E-15 | 3.34E-17 | 1.93E-17 | 9.20E-18 | 4.98E-18 | 3.36E-18 | 2.85E-19 | 5.98E-19 |
| SCl2(g)   | 1.44E-15 | 7.88E-17 | 5.41E-17 | 3.19E-17 | 2.00E-17 | 1.45E-17 | 1.14E-18 | 2.67E-18 |
| SF(g)     | 7.85E-18 | 1.02E-19 | 5.91E-20 | 2.82E-20 | 1.52E-20 | 1.03E-20 | 8.74E-22 | 1.84E-21 |
| SO(g)     | 2.72E-08 | 1.50E-09 | 1.04E-09 | 6.34E-10 | 4.20E-10 | 3.23E-10 | 6.18E-11 | 1.02E-10 |
| SO2Cl2(g) | 5.82E-16 | 1.01E-14 | 1.40E-14 | 2.08E-14 | 2.61E-14 | 2.85E-14 | 9.78E-15 | 1.76E-14 |
| SO2ClF(g) | 5.95E-16 | 1.03E-14 | 1.43E-14 | 2.13E-14 | 2.68E-14 | 2.92E-14 | 1.01E-14 | 1.81E-14 |
| SO3(g)    | 5.66E-06 | 9.94E-05 | 1.39E-04 | 2.13E-04 | 2.83E-04 | 3.28E-04 | 2.74E-04 | 3.45E-04 |
| SOCl(g)   | 7.07E-11 | 1.64E-11 | 1.35E-11 | 1.02E-11 | 7.80E-12 | 6.46E-12 | 1.14E-12 | 2.10E-12 |
| SOCI2(g)  | 4.44E-14 | 4.33E-14 | 4.23E-14 | 3.95E-14 | 3.50E-14 | 3.12E-14 | 5.12E-15 | 1.05E-14 |
| SOF(g)    | 4.70E-11 | 1.09E-11 | 8.96E-12 | 6.78E-12 | 5.19E-12 | 4.30E-12 | 7.63E-13 | 1.40E-12 |

## References

Roberts, T. J., Martin, R. S., and Jourdain, L.: Reactive bromine chemistry in Mount Etna's volcanic plume: The influence of total Br, high-temperature processing, aerosol loading and plume–air mixing, *Atmospheric Chemistry and Physics*, 14, 11201–11219, doi:10.5194/acp-14-11201-2014, 2014.
