# Supplementary material for: Halogen activation in the plume of Masaya volcano: field observations and box model investigations
Source: Copernicus journal article supplement (doi:10.5194/acp-21-3371-2021), 2021-03-04
Supplement: Supplementary file 9 [file acp-21-3371-2021-supplement.zip]

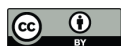

*Supplement of*

## **Halogen activation in the plume of Masaya volcano: field observations and box model investigations**

**Julian Rüdiger et al.**

*Correspondence to:* Thorsten Hoffmann ([t.hoffmann@uni-mainz.de](mailto:t.hoffmann@uni-mainz.de))

- [acp-21-3371-2021-supplement-title-page.pdf](#)
- [ACP-2020-284\\_Supplementary\\_Material.pdf](#)
- [CAABA-MECCA-Model\\_mechanism.pdf](#)
- [caaba\\_3.8m\\_volc1.zip](#)

The copyright of individual parts of the supplement might differ from the CC BY 4.0 License.
