# Supplementary material for: Halogen activation in the plume of Masaya volcano: field observations and box model investigations
Source: Copernicus journal article supplement (doi:10.5194/acp-21-3371-2021), 2021-03-04
Supplement: Supplementary file 11 [file acp-21-3371-2021-supplement.zip]

| KPP name   | $H^\ominus$  | Reference                       | $\frac{d \ln H^\ominus}{d(1/T)}$ | Reference |
|------------|--------------|---------------------------------|----------------------------------|-----------|
|            | [M/atm]      |                                 | [K]                              |           |
| O2         | 1.3E-3       | Wilhelm et al. (1977)           | 1500.                            | ???       |
| O3         | 1.2E-2       | Chameides (1984)                | 2560.                            | ???       |
| H          | -9.99999     | ???                             | -9.99999                         | ???       |
| H2         | -9.99999     | ???                             | -9.99999                         | ???       |
| OH         | 3.0E1        | Hanson et al. (1992)            | 4300.                            | ???       |
| HO2        | 3.9E3        | Hanson et al. (1992)            | 5900.                            | ???       |
| H2O        | BIG_DP       | see notes                       | 0.                               | ???       |
| H2O2       | 1.E5         | Lind and Kok (1994)             | 6338.                            | ???       |
| NH3        | 58.          | Chameides (1984)                | 4085.                            | ???       |
| NO         | 1.9E-3       | Schwartz and White (1981)       | 1480.                            | ???       |
| NO2        | 7.0E-3       | Lee and Schwartz (1981)         | 2500.                            | ???       |
| NO3        | 2.           | Thomas et al. (1993)            | 2000.                            | ???       |
| N2O5       | BIG_DP       | see notes                       | 0.                               | ???       |
| HONO       | 4.9E1        | Schwartz and White (1981)       | 4780.                            | ???       |
| HNO3       | 2.45E6/1.5E1 | Brimblecombe and Clegg (1989)   | 8694.                            | ???       |
| HNO4       | 1.2E4        | Régimbal and Mozurkewich (1997) | 6900.                            | ???       |
| NH2        | -9.99999     | ???                             | -9.99999                         | ???       |
| HNO        | -9.99999     | ???                             | -9.99999                         | ???       |
| NHOH       | -9.99999     | ???                             | -9.99999                         | ???       |
| NH2O       | -9.99999     | ???                             | -9.99999                         | ???       |
| NH2OH      | -9.99999     | ???                             | -9.99999                         | ???       |
| CH4        | -9.99999     | ???                             | -9.99999                         | ???       |
| CH3        | -9.99999     | ???                             | -9.99999                         | ???       |
| CH3O       | -9.99999     | ???                             | -9.99999                         | ???       |
| CO         | -9.99999     | ???                             | -9.99999                         | ???       |
| CO2        | 3.1E-2       | Chameides (1984)                | 2423.                            | ???       |
| HCHO       | 7.0E3        | Chameides (1984)                | 6425.                            | ???       |
| HCOOH      | 3.7E3        | Chameides (1984)                | 5700.                            | ???       |
| CH3O2      | 6.           | Jacob (1986)                    | 5600.                            | ???       |
| HOCH2O2    | -9.99999     | ???                             | -9.99999                         | ???       |
| CH3OH      | 2.20E2       | Snider and Dawson (1985)        | 5200.                            | ???       |
| CH3OOH     | 3.0E2        | Lind and Kok (1994)             | 5322.                            | ???       |
| HOCH2OOH   | -9.99999     | ???                             | -9.99999                         | ???       |
| HOCH2OH    | -9.99999     | ???                             | -9.99999                         | ???       |
| CH3ONO     | -9.99999     | ???                             | -9.99999                         | ???       |
| CH3NO3     | -9.99999     | ???                             | -9.99999                         | ???       |
| CH3O2NO2   | -9.99999     | ???                             | -9.99999                         | ???       |
| HOCH2O2NO2 | -9.99999     | ???                             | -9.99999                         | ???       |
| HCN        | -9.99999     | ???                             | -9.99999                         | ???       |
| CH2CO      | -9.99999     | ???                             | -9.99999                         | ???       |
| GLYOX      | 4.19E5       | Sander et al. (2011)            | 7481.                            | ???       |
| HCOCO2H    | 1.09E4       | Ip et al. (2009)                | 4800.                            | ???       |
| HCOCO3H    | -9.99999     | ???                             | -9.99999                         | ???       |
| CH2CHOH    | -9.99999     | ???                             | -9.99999                         | ???       |
| CH3CHO     | 1.29E1       | Sander et al. (2006)            | 5890.                            | ???       |
| CH3CO2H    | 4.1E3        | Sander et al. (2006)            | 6200.                            | ???       |

| KPP name      | $H^\ominus$<br>[M/atm] | Reference                     | $\frac{d \ln H^\ominus}{d(1/T)}$<br>[K] | Reference      |
|---------------|------------------------|-------------------------------|-----------------------------------------|----------------|
| HOCH2CHO      | 4.10E4                 | Betterton and Hoffmann (1988) | 4600.                                   | ???            |
| HOCH2CHO      | -9.99999               | ???                           | -9.99999                                | ???            |
| CH3CO3H       | -9.99999               | ???                           | -9.99999                                | ???            |
| HOCH2CO2H     | 2.83E4                 | Ip et al. (2009)              | 4029.                                   | ???            |
| HOCH2CO3H     | -9.99999               | ???                           | -9.99999                                | ???            |
| HOCH2CO2H     | -9.99999               | ???                           | -9.99999                                | ???            |
| HOCH2CO3H     | -9.99999               | ???                           | -9.99999                                | ???            |
| C2H5O2        | 6.                     | see notes                     | 5600.                                   | ???            |
| C2H5OH        | -9.99999               | ???                           | -9.99999                                | ???            |
| C2H5OOH       | -9.99999               | ???                           | -9.99999                                | ???            |
| ETHGLY        | -9.99999               | ???                           | -9.99999                                | ???            |
| HYETHO2H      | -9.99999               | ???                           | -9.99999                                | ???            |
| CH3CHOHOOH    | -9.99999               | ???                           | -9.99999                                | ???            |
| NO3CH2PAN     | -9.99999               | ???                           | -9.99999                                | ???            |
| CH3CN         | -9.99999               | ???                           | -9.99999                                | ???            |
| NO3CH2CHO     | -9.99999               | ???                           | -9.99999                                | ???            |
| PAN           | 2.8                    | Sander et al. (2006)          | 5730.                                   | ???            |
| PHAN          | -9.99999               | ???                           | -9.99999                                | ???            |
| ETHOHNO3      | -9.99999               | ???                           | -9.99999                                | ???            |
| C2H5NO3       | -9.99999               | ???                           | -9.99999                                | ???            |
| C2H5O2NO2     | -9.99999               | ???                           | -9.99999                                | ???            |
| OXL           | 3.2E6                  | Brimblecombe et al. (1992)    | 7285.                                   | ???            |
| C33CO         | -9.99999               | ???                           | -9.99999                                | ???            |
| ALCOCH2OOH    | -9.99999               | ???                           | -9.99999                                | ???            |
| MGLYOX        | 3.70E3                 | Betterton and Hoffmann (1988) | 7500.                                   | ???            |
| HOCH2COCHO    | -9.99999               | ???                           | -9.99999                                | ???            |
| HCOCH2CHO     | -9.99999               | ???                           | -9.99999                                | ???            |
| HCOCH2CO2H    | -9.99999               | ???                           | -9.99999                                | ???            |
| HCOCH2CO3H    | -9.99999               | ???                           | -9.99999                                | ???            |
| CH3COCH3      | 28.1                   | Sander et al. (2006)          | 5050.                                   | ???            |
| ACETOL        | -9.99999               | ???                           | -9.99999                                | ???            |
| HYPERACET     | -9.99999               | ???                           | -9.99999                                | ???            |
| HOC2H4CO2H    | -9.99999               | ???                           | -9.99999                                | ???            |
| HOC2H4CO3H    | -9.99999               | ???                           | -9.99999                                | ???            |
| IC3H7OOH      | -9.99999               | ???                           | -9.99999                                | ???            |
| HYPPO2H       | -9.99999               | ???                           | -9.99999                                | ???            |
| CH3CHCO       | -9.99999               | ???                           | -9.99999                                | ???            |
| CH3COCO2H     | 3.11E5                 | Sander et al. (2011)          | 5090.                                   | ???            |
| CH3COCO3H     | -9.99999               | ???                           | -9.99999                                | ???            |
| HCOCOCH2OOH   | -9.99999               | ???                           | -9.99999                                | ???            |
| C2H5CHO       | -9.99999               | ???                           | -9.99999                                | ???            |
| PROPENOL      | -9.99999               | ???                           | -9.99999                                | ???            |
| C2H5CO2H      | 5.7E3                  | Khan et al. (1995)            | 6800.                                   | Abraham (1984) |
| C2H5CO3H      | -9.99999               | ???                           | -9.99999                                | ???            |
| HOCH2COCH2OOH | -9.99999               | ???                           | -9.99999                                | ???            |
| IPROPOL       | -9.99999               | ???                           | -9.99999                                | ???            |

| KPP name      | $H^\ominus$ |                    | $\frac{d \ln H^\ominus}{d(1/T)}$ |           |
|---------------|-------------|--------------------|----------------------------------|-----------|
|               | [M/atm]     | Reference          | [K]                              | Reference |
| NPROPOL       | -9.99999    | ???                | -9.99999                         | ???       |
| NC3H7OOH      | -9.99999    | ???                | -9.99999                         | ???       |
| C3DIALOOH     | -9.99999    | ???                | -9.99999                         | ???       |
| METACETHO     | -9.99999    | ???                | -9.99999                         | ???       |
| C32OH13CO     | -9.99999    | ???                | -9.99999                         | ???       |
| HCOCO3HCO3H   | -9.99999    | ???                | -9.99999                         | ???       |
| C3PAN2        | -9.99999    | ???                | -9.99999                         | ???       |
| NOA           | -9.99999    | ???                | -9.99999                         | ???       |
| CH3COCH2O2NO2 | -9.99999    | ???                | -9.99999                         | ???       |
| PPN           | -9.99999    | ???                | -9.99999                         | ???       |
| C3PAN1        | -9.99999    | ???                | -9.99999                         | ???       |
| NC3H7NO3      | -9.99999    | ???                | -9.99999                         | ???       |
| IC3H7NO3      | -9.99999    | ???                | -9.99999                         | ???       |
| PROPOLNO3     | -9.99999    | ???                | -9.99999                         | ???       |
| PR2O2HNO3     | -9.99999    | ???                | -9.99999                         | ???       |
| HCOCOHPAN     | -9.99999    | ???                | -9.99999                         | ???       |
| HCOCCH3CO     | -9.99999    | ???                | -9.99999                         | ???       |
| CH3COCHCO     | -9.99999    | ???                | -9.99999                         | ???       |
| C4CODIAL      | -9.99999    | ???                | -9.99999                         | ???       |
| CO23C3CHO     | -9.99999    | ???                | -9.99999                         | ???       |
| C312COCO3H    | -9.99999    | ???                | -9.99999                         | ???       |
| CO2H3CHO      | -9.99999    | ???                | -9.99999                         | ???       |
| BIACETO2      | -9.99999    | ???                | -9.99999                         | ???       |
| CHOC3COO2     | -9.99999    | ???                | -9.99999                         | ???       |
| MACR          | -9.99999    | ???                | -9.99999                         | ???       |
| MVK           | -9.99999    | ???                | -9.99999                         | ???       |
| BIACET        | -9.99999    | ???                | -9.99999                         | ???       |
| MACO2H        | 2.58E3      | Khan et al. (1992) | 0.                               | ???       |
| HVMK          | -9.99999    | ???                | -9.99999                         | ???       |
| HMAC          | -9.99999    | ???                | -9.99999                         | ???       |
| CO2C3CHO      | -9.99999    | ???                | -9.99999                         | ???       |
| IBUTDIAL      | -9.99999    | ???                | -9.99999                         | ???       |
| MACO3H        | -9.99999    | ???                | -9.99999                         | ???       |
| BIACETOH      | -9.99999    | ???                | -9.99999                         | ???       |
| CH3COOHCHCHO  | -9.99999    | ???                | -9.99999                         | ???       |
| HCOCCH3CHOOH  | -9.99999    | ???                | -9.99999                         | ???       |
| C413COOOH     | -9.99999    | ???                | -9.99999                         | ???       |
| BIACETOOH     | -9.99999    | ???                | -9.99999                         | ???       |
| CH3COCOCO2H   | -9.99999    | ???                | -9.99999                         | ???       |
| CO2H3CO2H     | -9.99999    | ???                | -9.99999                         | ???       |
| C44OOH        | -9.99999    | ???                | -9.99999                         | ???       |
| CO2H3CO3H     | -9.99999    | ???                | -9.99999                         | ???       |
| MACRN         | -9.99999    | ???                | -9.99999                         | ???       |
| MVKNO3        | -9.99999    | ???                | -9.99999                         | ???       |
| PIPN          | -9.99999    | ???                | -9.99999                         | ???       |
| MEK           | -9.99999    | ???                | -9.99999                         | ???       |

| KPP name                | $H^\ominus$ |           | $\frac{d \ln H^\ominus}{d(1/T)}$ |           |
|-------------------------|-------------|-----------|----------------------------------|-----------|
|                         | [M/atm]     | Reference | [K]                              | Reference |
| HO12CO3C4               | -9.99999    | ???       | -9.99999                         | ???       |
| MACROH                  | -9.99999    | ???       | -9.99999                         | ???       |
| MACROOH                 | -9.99999    | ???       | -9.99999                         | ???       |
| BUTENOL                 | -9.99999    | ???       | -9.99999                         | ???       |
| C3H7CHO                 | -9.99999    | ???       | -9.99999                         | ???       |
| IPRCHO                  | -9.99999    | ???       | -9.99999                         | ???       |
| MPROPENOL               | -9.99999    | ???       | -9.99999                         | ???       |
| IBUTALOH                | -9.99999    | ???       | -9.99999                         | ???       |
| BUT2OLO                 | -9.99999    | ???       | -9.99999                         | ???       |
| PERIBUACID              | -9.99999    | ???       | -9.99999                         | ???       |
| IPRHOCO2H               | -9.99999    | ???       | -9.99999                         | ???       |
| IPRHOCO3H               | -9.99999    | ???       | -9.99999                         | ???       |
| IC4H9NO3                | -9.99999    | ???       | -9.99999                         | ???       |
| TC4H9NO3                | -9.99999    | ???       | -9.99999                         | ???       |
| BUT2OLNO3               | -9.99999    | ???       | -9.99999                         | ???       |
| TC4H9OOH                | -9.99999    | ???       | -9.99999                         | ???       |
| IC4H9OOH                | -9.99999    | ???       | -9.99999                         | ???       |
| IBUTOLBOOH              | -9.99999    | ???       | -9.99999                         | ???       |
| BUT2OLOOH               | -9.99999    | ???       | -9.99999                         | ???       |
| MALANH <sub>Y</sub>     | -9.99999    | ???       | -9.99999                         | ???       |
| CO2C4DIAL               | -9.99999    | ???       | -9.99999                         | ???       |
| MALNH <sub>Y</sub> OHCO | -9.99999    | ???       | -9.99999                         | ???       |
| BZFUONE                 | -9.99999    | ???       | -9.99999                         | ???       |
| MALDIAL                 | -9.99999    | ???       | -9.99999                         | ???       |
| MALDALCO2H              | -9.99999    | ???       | -9.99999                         | ???       |
| EPXC4DIAL               | -9.99999    | ???       | -9.99999                         | ???       |
| HOCOC4DIAL              | -9.99999    | ???       | -9.99999                         | ???       |
| MALDALCO3H              | -9.99999    | ???       | -9.99999                         | ???       |
| BZFUCO                  | -9.99999    | ???       | -9.99999                         | ???       |
| EPXDLCO2H               | -9.99999    | ???       | -9.99999                         | ???       |
| CO14O3CHO               | -9.99999    | ???       | -9.99999                         | ???       |
| CO14O3CO2H              | -9.99999    | ???       | -9.99999                         | ???       |
| EPXDLCO3H               | -9.99999    | ???       | -9.99999                         | ???       |
| MALANH <sub>Y</sub> OOH | -9.99999    | ???       | -9.99999                         | ???       |
| MALDIALOOH              | -9.99999    | ???       | -9.99999                         | ???       |
| BZFUOOH                 | -9.99999    | ???       | -9.99999                         | ???       |
| MECOACEOOH              | -9.99999    | ???       | -9.99999                         | ???       |
| C312COPAN               | -9.99999    | ???       | -9.99999                         | ???       |
| MPAN                    | -9.99999    | ???       | -9.99999                         | ???       |
| IBUTOLBNO3              | -9.99999    | ???       | -9.99999                         | ???       |
| C4PAN5                  | -9.99999    | ???       | -9.99999                         | ???       |
| NC4DCO2H                | -9.99999    | ???       | -9.99999                         | ???       |
| MALDIALPAN              | -9.99999    | ???       | -9.99999                         | ???       |
| NBZFUONE                | -9.99999    | ???       | -9.99999                         | ???       |
| EPXDLPAN                | -9.99999    | ???       | -9.99999                         | ???       |
| NBZFUOOH                | -9.99999    | ???       | -9.99999                         | ???       |

| KPP name       | $H^\ominus$ |           | $\frac{d \ln H^\ominus}{d(1/T)}$ |           |
|----------------|-------------|-----------|----------------------------------|-----------|
|                | [M/atm]     | Reference | [K]                              | Reference |
| LMEKOOH        | -9.99999    | ???       | -9.99999                         | ???       |
| LHMKABOOH      | -9.99999    | ???       | -9.99999                         | ???       |
| LC4H9OOH       | -9.99999    | ???       | -9.99999                         | ???       |
| LBUT1ENOOH     | -9.99999    | ???       | -9.99999                         | ???       |
| LMEKNO3        | -9.99999    | ???       | -9.99999                         | ???       |
| LC4H9NO3       | -9.99999    | ???       | -9.99999                         | ???       |
| LBUT1ENNO3     | -9.99999    | ???       | -9.99999                         | ???       |
| ME3FURAN       | -9.99999    | ???       | -9.99999                         | ???       |
| ZCODC23DBCOD   | -9.99999    | ???       | -9.99999                         | ???       |
| CO13C4CHO      | -9.99999    | ???       | -9.99999                         | ???       |
| CO23C4CHO      | -9.99999    | ???       | -9.99999                         | ???       |
| ZCO3HC23DBCOD  | -9.99999    | ???       | -9.99999                         | ???       |
| C513CO         | -9.99999    | ???       | -9.99999                         | ???       |
| CHOC3COOOH     | -9.99999    | ???       | -9.99999                         | ???       |
| CO23C4CO3H     | -9.99999    | ???       | -9.99999                         | ???       |
| C5H8           | -9.99999    | ???       | -9.99999                         | ???       |
| HCOC5          | -9.99999    | ???       | -9.99999                         | ???       |
| ZCODC23DBC00H  | -9.99999    | ???       | -9.99999                         | ???       |
| MBOCOCO        | -9.99999    | ???       | -9.99999                         | ???       |
| C511OOH        | -9.99999    | ???       | -9.99999                         | ???       |
| C514OOH        | -9.99999    | ???       | -9.99999                         | ???       |
| C512OOH        | -9.99999    | ???       | -9.99999                         | ???       |
| C1ODC2OOHC4OD  | -9.99999    | ???       | -9.99999                         | ???       |
| C513OOH        | -9.99999    | ???       | -9.99999                         | ???       |
| C1ODC2O2C4OOH  | -9.99999    | ???       | -9.99999                         | ???       |
| C1ODC3O2C4OOH  | -9.99999    | ???       | -9.99999                         | ???       |
| MBO            | -9.99999    | ???       | -9.99999                         | ???       |
| ISOPAOH        | -9.99999    | ???       | -9.99999                         | ???       |
| ISOPBOH        | -9.99999    | ???       | -9.99999                         | ???       |
| ISOPDOH        | -9.99999    | ???       | -9.99999                         | ???       |
| ISOPBOOH       | -9.99999    | ???       | -9.99999                         | ???       |
| ISOPDOOH       | -9.99999    | ???       | -9.99999                         | ???       |
| MBOACO         | -9.99999    | ???       | -9.99999                         | ???       |
| DB1OOH         | -9.99999    | ???       | -9.99999                         | ???       |
| C59OOH         | -9.99999    | ???       | -9.99999                         | ???       |
| C1OOHC2OOHC4OD | -9.99999    | ???       | -9.99999                         | ???       |
| DB2OOH         | -9.99999    | ???       | -9.99999                         | ???       |
| C4CO2DBC03     | -9.99999    | ???       | -9.99999                         | ???       |
| MMALANHY       | -9.99999    | ???       | -9.99999                         | ???       |
| C54CO          | -9.99999    | ???       | -9.99999                         | ???       |
| C4CO2DCO3H     | -9.99999    | ???       | -9.99999                         | ???       |
| C5DIALCO       | -9.99999    | ???       | -9.99999                         | ???       |
| ACCOMECO3      | -9.99999    | ???       | -9.99999                         | ???       |
| MMALANHYO2     | -9.99999    | ???       | -9.99999                         | ???       |
| TLFUONE        | -9.99999    | ???       | -9.99999                         | ???       |
| C5DICARB       | -9.99999    | ???       | -9.99999                         | ???       |

| KPP name      | $H^\ominus$ |           | $\frac{d \ln H^\ominus}{d(1/T)}$ |           |
|---------------|-------------|-----------|----------------------------------|-----------|
|               | [M/atm]     | Reference | [K]                              | Reference |
| MC3ODBCO2H    | -9.99999    | ???       | -9.99999                         | ???       |
| C5CO14OH      | -9.99999    | ???       | -9.99999                         | ???       |
| C5134CO2OH    | -9.99999    | ???       | -9.99999                         | ???       |
| C5DIALOOH     | -9.99999    | ???       | -9.99999                         | ???       |
| ACCOMMECHO    | -9.99999    | ???       | -9.99999                         | ???       |
| C5CO14OOH     | -9.99999    | ???       | -9.99999                         | ???       |
| C24O3CCO2H    | -9.99999    | ???       | -9.99999                         | ???       |
| MMALNHOOH     | -9.99999    | ???       | -9.99999                         | ???       |
| ACCOMMECO3H   | -9.99999    | ???       | -9.99999                         | ???       |
| TLFUOOH       | -9.99999    | ???       | -9.99999                         | ???       |
| C5DICAROOH    | -9.99999    | ???       | -9.99999                         | ???       |
| CHOC3COPAN    | -9.99999    | ???       | -9.99999                         | ???       |
| ZCPANC23DBCOD | -9.99999    | ???       | -9.99999                         | ???       |
| C5PAN9        | -9.99999    | ???       | -9.99999                         | ???       |
| NC4CHO        | -9.99999    | ???       | -9.99999                         | ???       |
| C514NO3       | -9.99999    | ???       | -9.99999                         | ???       |
| NC4OHCPAN     | -9.99999    | ???       | -9.99999                         | ???       |
| ISOPBNO3      | -9.99999    | ???       | -9.99999                         | ???       |
| ISOPDNO3      | -9.99999    | ???       | -9.99999                         | ???       |
| NISOPOOH      | -9.99999    | ???       | -9.99999                         | ???       |
| NMBOBCO       | -9.99999    | ???       | -9.99999                         | ???       |
| C4MCONO3OH    | -9.99999    | ???       | -9.99999                         | ???       |
| DB1NO3        | -9.99999    | ???       | -9.99999                         | ???       |
| NC4OHCO3H     | -9.99999    | ???       | -9.99999                         | ???       |
| C4CO2DBPAN    | -9.99999    | ???       | -9.99999                         | ???       |
| NC4MDCO2H     | -9.99999    | ???       | -9.99999                         | ???       |
| C5COO2NO2     | -9.99999    | ???       | -9.99999                         | ???       |
| ACCOMEPAN     | -9.99999    | ???       | -9.99999                         | ???       |
| NTLFUOOH      | -9.99999    | ???       | -9.99999                         | ???       |
| LHC4ACCHO     | -9.99999    | ???       | -9.99999                         | ???       |
| LHC4ACCO2H    | -9.99999    | ???       | -9.99999                         | ???       |
| LHC4ACCO3H    | -9.99999    | ???       | -9.99999                         | ???       |
| LIEPOX        | -9.99999    | ???       | -9.99999                         | ???       |
| LISOPACOOH    | -9.99999    | ???       | -9.99999                         | ???       |
| LC578OOH      | -9.99999    | ???       | -9.99999                         | ???       |
| LMBOABOOH     | -9.99999    | ???       | -9.99999                         | ???       |
| LC5PAN1719    | -9.99999    | ???       | -9.99999                         | ???       |
| LISOPACNO3    | -9.99999    | ???       | -9.99999                         | ???       |
| LNMBOABOOH    | -9.99999    | ???       | -9.99999                         | ???       |
| LMBOABNO3     | -9.99999    | ???       | -9.99999                         | ???       |
| LNISOOH       | -9.99999    | ???       | -9.99999                         | ???       |
| C614CO        | -9.99999    | ???       | -9.99999                         | ???       |
| CO235C6OOH    | -9.99999    | ???       | -9.99999                         | ???       |
| C614OOH       | -9.99999    | ???       | -9.99999                         | ???       |
| PBZQONE       | -9.99999    | ???       | -9.99999                         | ???       |
| CATECHOL      | -9.99999    | ???       | -9.99999                         | ???       |

| KPP name   | $H^\ominus$ |           | $\frac{d \ln H^\ominus}{d(1/T)}$ |           |
|------------|-------------|-----------|----------------------------------|-----------|
|            | [M/atm]     | Reference | [K]                              | Reference |
| C6CO4DB    | -9.99999    | ???       | -9.99999                         | ???       |
| PBZQCO     | -9.99999    | ???       | -9.99999                         | ???       |
| C6H5O      | -9.99999    | ???       | -9.99999                         | ???       |
| CATEC1O    | -9.99999    | ???       | -9.99999                         | ???       |
| C5CO2DBCO3 | -9.99999    | ???       | -9.99999                         | ???       |
| C5CO2DCO3H | -9.99999    | ???       | -9.99999                         | ???       |
| C5CO2OHCO3 | -9.99999    | ???       | -9.99999                         | ???       |
| BENZENE    | -9.99999    | ???       | -9.99999                         | ???       |
| PHENOL     | -9.99999    | ???       | -9.99999                         | ???       |
| C6H5OOH    | -9.99999    | ???       | -9.99999                         | ???       |
| BZEPOXMUC  | -9.99999    | ???       | -9.99999                         | ???       |
| C6125CO    | -9.99999    | ???       | -9.99999                         | ???       |
| CATEC1OOH  | -9.99999    | ???       | -9.99999                         | ???       |
| BZEMUCCO2H | -9.99999    | ???       | -9.99999                         | ???       |
| BZOBIPEROH | -9.99999    | ???       | -9.99999                         | ???       |
| BZEMUCCO   | -9.99999    | ???       | -9.99999                         | ???       |
| PBZQOOH    | -9.99999    | ???       | -9.99999                         | ???       |
| BZEMUCCO3H | -9.99999    | ???       | -9.99999                         | ???       |
| C5COOHCO3H | -9.99999    | ???       | -9.99999                         | ???       |
| C615CO2OOH | -9.99999    | ???       | -9.99999                         | ???       |
| BZBIPEROOH | -9.99999    | ???       | -9.99999                         | ???       |
| PHENOOH    | -9.99999    | ???       | -9.99999                         | ???       |
| BZEMUCOOH  | -9.99999    | ???       | -9.99999                         | ???       |
| C614NO3    | -9.99999    | ???       | -9.99999                         | ???       |
| NPHEN1O    | -9.99999    | ???       | -9.99999                         | ???       |
| DNPHEN     | -9.99999    | ???       | -9.99999                         | ???       |
| HOC6H4NO2  | -9.99999    | ???       | -9.99999                         | ???       |
| NCATECHOL  | -9.99999    | ???       | -9.99999                         | ???       |
| NPHEN1OOH  | -9.99999    | ???       | -9.99999                         | ???       |
| BZEMUCPAN  | -9.99999    | ???       | -9.99999                         | ???       |
| C5CO2DBPAN | -9.99999    | ???       | -9.99999                         | ???       |
| NBZQOOH    | -9.99999    | ???       | -9.99999                         | ???       |
| C5CO2OHPAN | -9.99999    | ???       | -9.99999                         | ???       |
| NDNPHENOOH | -9.99999    | ???       | -9.99999                         | ???       |
| DNPHENOOH  | -9.99999    | ???       | -9.99999                         | ???       |
| NNCATECOOH | -9.99999    | ???       | -9.99999                         | ???       |
| BZBIPERNO3 | -9.99999    | ???       | -9.99999                         | ???       |
| BZEMUCNO3  | -9.99999    | ???       | -9.99999                         | ???       |
| NPHENOOH   | -9.99999    | ???       | -9.99999                         | ???       |
| NCATECOOH  | -9.99999    | ???       | -9.99999                         | ???       |
| CO235C6CHO | -9.99999    | ???       | -9.99999                         | ???       |
| C235C6CO3H | -9.99999    | ???       | -9.99999                         | ???       |
| C716OOH    | -9.99999    | ???       | -9.99999                         | ???       |
| C721OOH    | -9.99999    | ???       | -9.99999                         | ???       |
| C722OOH    | -9.99999    | ???       | -9.99999                         | ???       |
| BENZAL     | -9.99999    | ???       | -9.99999                         | ???       |

| KPP name   | $H^\ominus$<br>[M/atm] | Reference        | $\frac{d \ln H^\ominus}{d(1/T)}$ |           |
|------------|------------------------|------------------|----------------------------------|-----------|
|            |                        |                  | [K]                              | Reference |
| PHCOOH     | 1.4E4                  | Goldstein (1982) | 6500.                            | ???       |
| PTLQONE    | -9.99999               | ???              | -9.99999                         | ???       |
| C6H5CO3H   | -9.99999               | ???              | -9.99999                         | ???       |
| C7CO4DB    | -9.99999               | ???              | -9.99999                         | ???       |
| PTLQCO     | -9.99999               | ???              | -9.99999                         | ???       |
| TOL1O      | -9.99999               | ???              | -9.99999                         | ???       |
| MCATEC1O   | -9.99999               | ???              | -9.99999                         | ???       |
| TOLUENE    | -9.99999               | ???              | -9.99999                         | ???       |
| CRESOL     | -9.99999               | ???              | -9.99999                         | ???       |
| OXYL1OOH   | -9.99999               | ???              | -9.99999                         | ???       |
| C6H5CH2OOH | -9.99999               | ???              | -9.99999                         | ???       |
| MCATECHOL  | -9.99999               | ???              | -9.99999                         | ???       |
| TLEPOXMUC  | -9.99999               | ???              | -9.99999                         | ???       |
| MCATEC1OOH | -9.99999               | ???              | -9.99999                         | ???       |
| TLEMUCCO2H | -9.99999               | ???              | -9.99999                         | ???       |
| TLOBIPEROH | -9.99999               | ???              | -9.99999                         | ???       |
| PTLQOOH    | -9.99999               | ???              | -9.99999                         | ???       |
| TLEMUCCO   | -9.99999               | ???              | -9.99999                         | ???       |
| TLEMUCCO3H | -9.99999               | ???              | -9.99999                         | ???       |
| C6COOHCO3H | -9.99999               | ???              | -9.99999                         | ???       |
| TLBIPEROOH | -9.99999               | ???              | -9.99999                         | ???       |
| CRESOOH    | -9.99999               | ???              | -9.99999                         | ???       |
| TLEMUCOOH  | -9.99999               | ???              | -9.99999                         | ???       |
| C7PAN3     | -9.99999               | ???              | -9.99999                         | ???       |
| PBZN       | -9.99999               | ???              | -9.99999                         | ???       |
| NCRES1O    | -9.99999               | ???              | -9.99999                         | ???       |
| DNCRES     | -9.99999               | ???              | -9.99999                         | ???       |
| TOL1OHNO2  | -9.99999               | ???              | -9.99999                         | ???       |
| C6H5CH2NO3 | -9.99999               | ???              | -9.99999                         | ???       |
| MNCATECH   | -9.99999               | ???              | -9.99999                         | ???       |
| NCRES1OOH  | -9.99999               | ???              | -9.99999                         | ???       |
| NPTLQOOH   | -9.99999               | ???              | -9.99999                         | ???       |
| TLEMUCPAN  | -9.99999               | ???              | -9.99999                         | ???       |
| C6CO2OHPAN | -9.99999               | ???              | -9.99999                         | ???       |
| NDNCRESOOH | -9.99999               | ???              | -9.99999                         | ???       |
| DNCRESOOH  | -9.99999               | ???              | -9.99999                         | ???       |
| MNNCATCOOH | -9.99999               | ???              | -9.99999                         | ???       |
| TLBIPERNO3 | -9.99999               | ???              | -9.99999                         | ???       |
| TLEMUCNO3  | -9.99999               | ???              | -9.99999                         | ???       |
| NCRESOOH   | -9.99999               | ???              | -9.99999                         | ???       |
| MNCATECOOH | -9.99999               | ???              | -9.99999                         | ???       |
| C8BCCO     | -9.99999               | ???              | -9.99999                         | ???       |
| C8BCOOH    | -9.99999               | ???              | -9.99999                         | ???       |
| C721CHO    | -9.99999               | ???              | -9.99999                         | ???       |
| NORPINIC   | -9.99999               | ???              | -9.99999                         | ???       |
| C721CO3H   | -9.99999               | ???              | -9.99999                         | ???       |



| KPP name    | $H^\ominus$ |           | $\frac{d \ln H^\ominus}{d(1/T)}$ |           |
|-------------|-------------|-----------|----------------------------------|-----------|
|             | [M/atm]     | Reference | [K]                              | Reference |
| C8BC        | -9.99999    | ???       | -9.99999                         | ???       |
| C85OOH      | -9.99999    | ???       | -9.99999                         | ???       |
| C86OOH      | -9.99999    | ???       | -9.99999                         | ???       |
| C812OOH     | -9.99999    | ???       | -9.99999                         | ???       |
| C813OOH     | -9.99999    | ???       | -9.99999                         | ???       |
| C89OOH      | -9.99999    | ???       | -9.99999                         | ???       |
| C810OOH     | -9.99999    | ???       | -9.99999                         | ???       |
| STYRENE     | -9.99999    | ???       | -9.99999                         | ???       |
| LXYL        | -9.99999    | ???       | -9.99999                         | ???       |
| EBENZ       | -9.99999    | ???       | -9.99999                         | ???       |
| STYRENOOH   | -9.99999    | ???       | -9.99999                         | ???       |
| C8BCNO3     | -9.99999    | ???       | -9.99999                         | ???       |
| C721PAN     | -9.99999    | ???       | -9.99999                         | ???       |
| C89NO3      | -9.99999    | ???       | -9.99999                         | ???       |
| C810NO3     | -9.99999    | ???       | -9.99999                         | ???       |
| NSTYRENOOH  | -9.99999    | ???       | -9.99999                         | ???       |
| NOPINDCO    | -9.99999    | ???       | -9.99999                         | ???       |
| C85CO3H     | -9.99999    | ???       | -9.99999                         | ???       |
| NOPINONE    | -9.99999    | ???       | -9.99999                         | ???       |
| NOPINOO     | -9.99999    | ???       | -9.99999                         | ???       |
| NORPINAL    | -9.99999    | ???       | -9.99999                         | ???       |
| NORPINENOL  | -9.99999    | ???       | -9.99999                         | ???       |
| C89CO2H     | -9.99999    | ???       | -9.99999                         | ???       |
| NOPINDOOH   | -9.99999    | ???       | -9.99999                         | ???       |
| RO6R3P      | -9.99999    | ???       | -9.99999                         | ???       |
| C89CO3H     | -9.99999    | ???       | -9.99999                         | ???       |
| PINIC       | -9.99999    | ???       | -9.99999                         | ???       |
| C811CO3H    | -9.99999    | ???       | -9.99999                         | ???       |
| C96OOH      | -9.99999    | ???       | -9.99999                         | ???       |
| C97OOH      | -9.99999    | ???       | -9.99999                         | ???       |
| C98OOH      | -9.99999    | ???       | -9.99999                         | ???       |
| C89PAN      | -9.99999    | ???       | -9.99999                         | ???       |
| C9PAN2      | -9.99999    | ???       | -9.99999                         | ???       |
| C811PAN     | -9.99999    | ???       | -9.99999                         | ???       |
| C96NO3      | -9.99999    | ???       | -9.99999                         | ???       |
| LTMB        | -9.99999    | ???       | -9.99999                         | ???       |
| C109CO      | -9.99999    | ???       | -9.99999                         | ???       |
| PINALOOH    | -9.99999    | ???       | -9.99999                         | ???       |
| APINENE     | -9.99999    | ???       | -9.99999                         | ???       |
| BPINENE     | -9.99999    | ???       | -9.99999                         | ???       |
| CARENE      | -9.99999    | ???       | -9.99999                         | ???       |
| SABINENE    | -9.99999    | ???       | -9.99999                         | ???       |
| CAMPHENE    | -9.99999    | ???       | -9.99999                         | ???       |
| PINAL       | -9.99999    | ???       | -9.99999                         | ???       |
| PINENOL     | -9.99999    | ???       | -9.99999                         | ???       |
| MENTHEN6ONE | -9.99999    | ???       | -9.99999                         | ???       |

| KPP name       | $H^\ominus$ | Reference                     | $\frac{d \ln H^\ominus}{d(1/T)}$ | Reference |
|----------------|-------------|-------------------------------|----------------------------------|-----------|
|                | [M/atm]     |                               | [K]                              |           |
| PINONIC        | -9.99999    | ???                           | -9.99999                         | ???       |
| C109OOH        | -9.99999    | ???                           | -9.99999                         | ???       |
| PERPINONIC     | -9.99999    | ???                           | -9.99999                         | ???       |
| C106OOH        | -9.99999    | ???                           | -9.99999                         | ???       |
| OH2MENTHEN6ONE | -9.99999    | ???                           | -9.99999                         | ???       |
| BPINAOOH       | -9.99999    | ???                           | -9.99999                         | ???       |
| RO6R3OOH       | -9.99999    | ???                           | -9.99999                         | ???       |
| PINALNO3       | -9.99999    | ???                           | -9.99999                         | ???       |
| C10PAN2        | -9.99999    | ???                           | -9.99999                         | ???       |
| C106NO3        | -9.99999    | ???                           | -9.99999                         | ???       |
| BPINANO3       | -9.99999    | ???                           | -9.99999                         | ???       |
| RO6R1NO3       | -9.99999    | ???                           | -9.99999                         | ???       |
| RO6R3NO3       | -9.99999    | ???                           | -9.99999                         | ???       |
| ROO6R1NO3      | -9.99999    | ???                           | -9.99999                         | ???       |
| LAPINABOOH     | -9.99999    | ???                           | -9.99999                         | ???       |
| LAPINABNO3     | -9.99999    | ???                           | -9.99999                         | ???       |
| LNAPINABOOH    | -9.99999    | ???                           | -9.99999                         | ???       |
| LNBPINABOOH    | -9.99999    | ???                           | -9.99999                         | ???       |
| LHAROM         | -9.99999    | ???                           | -9.99999                         | ???       |
| CHF3           | -9.99999    | ???                           | -9.99999                         | ???       |
| CHF2CF3        | -9.99999    | ???                           | -9.99999                         | ???       |
| CH3CF3         | -9.99999    | ???                           | -9.99999                         | ???       |
| CH2F2          | -9.99999    | ???                           | -9.99999                         | ???       |
| CH3CHF2        | -9.99999    | ???                           | -9.99999                         | ???       |
| Cl2            | 9.2E-2      | Bartlett and Margerum (1999)  | 2081.                            | ???       |
| HCl            | 2./1.7      | Brimblecombe and Clegg (1989) | 9001.                            | ???       |
| HOCl           | 6.6E2       | Huthwelker et al. (1995)      | 5862.                            | ???       |
| ClNO3          | BIG_DP      | see notes                     | 0.                               | ???       |
| CH3Cl          | -9.99999    | ???                           | -9.99999                         | ???       |
| CHF2Cl         | -9.99999    | ???                           | -9.99999                         | ???       |
| CH2FCF3        | -9.99999    | ???                           | -9.99999                         | ???       |
| CF2ClCFC12     | -9.99999    | ???                           | -9.99999                         | ???       |
| CH2Cl2         | -9.99999    | ???                           | -9.99999                         | ???       |
| CH3CFC12       | -9.99999    | ???                           | -9.99999                         | ???       |
| CF2ClCF2Cl     | -9.99999    | ???                           | -9.99999                         | ???       |
| CHCl3          | -9.99999    | ???                           | -9.99999                         | ???       |
| CF3CF2Cl       | -9.99999    | ???                           | -9.99999                         | ???       |
| Br2            | 7.7E-1      | Bartlett and Margerum (1999)  | 3837.                            | ???       |
| HBr            | 1.3         | Brimblecombe and Clegg (1989) | 10239.                           | ???       |
| HOBr           | 1.3E3       | Blatchley et al. (1992)       | 5862.                            | ???       |
| BrNO3          | BIG_DP      | see notes                     | 0.                               | ???       |
| BrCl           | 9.4E-1      | Bartlett and Margerum (1999)  | 5600.                            | ???       |
| CH3Br          | -9.99999    | ???                           | -9.99999                         | ???       |
| CHCl2Br        | -9.99999    | ???                           | -9.99999                         | ???       |
| CHClBr2        | -9.99999    | ???                           | -9.99999                         | ???       |
| CH2ClBr        | -9.99999    | ???                           | -9.99999                         | ???       |

| KPP name | $H^\ominus$ | Reference                     | $\frac{d \ln H^\ominus}{d(1/T)}$ | Reference |
|----------|-------------|-------------------------------|----------------------------------|-----------|
|          | [M/atm]     |                               | [K]                              |           |
| CH2Br2   | -9.99999    | ???                           | -9.99999                         | ???       |
| CHBr3    | -9.99999    | ???                           | -9.99999                         | ???       |
| I2       | 3.          | Palmer et al. (1985)          | 4431.                            | ???       |
| IO       | 4.5E2       | see notes                     | 5862.                            | ???       |
| OIO      | BIG_DP      | see notes                     | 0.                               | ???       |
| I2O2     | BIG_DP      | see notes                     | 0.                               | ???       |
| HI       | BIG_DP      | see notes                     | 0.                               | ???       |
| HOI      | 4.5E2       | Chatfield and Crutzen (1990)  | 5862.                            | ???       |
| HIO3     | BIG_DP      | see notes                     | 0.                               | ???       |
| INO2     | BIG_DP      | see notes                     | 0.                               | ???       |
| INO3     | BIG_DP      | see notes                     | 0.                               | ???       |
| ICl      | 1.1E2       | see notes                     | 5600.                            | ???       |
| CH2ClI   | -9.99999    | ???                           | -9.99999                         | ???       |
| IBr      | 2.4E1       | see notes                     | 5600.                            | ???       |
| SO2      | 1.3         | Burkholder et al. (2015)      | 2900.                            | ???       |
| H2SO4    | 1.E11       | see notes                     | 0.                               | ???       |
| CH3SO3H  | BIG_DP      | see notes                     | 0.                               | ???       |
| DMS      | 5.4E-1      | Staudinger and Roberts (2001) | 3500.                            | ???       |
| DMSO     | 5.E4        | De Bruyn et al. (1994)        | 6425.                            | ???       |
| CH3SO2   | -9.99999    | ???                           | -9.99999                         | ???       |
| CH3SO3   | -9.99999    | ???                           | -9.99999                         | ???       |
| Hg       | 0.13        | Schroeder and Munthe (1998)   | 0.                               | ???       |
| HgO      | 3.2E6       | Shon et al. (2005)            | 0.                               | ???       |
| HgCl     | 2.4E7       | Shon et al. (2005)            | 0.                               | ???       |
| HgCl2    | 2.4E7       | Shon et al. (2005)            | 0.                               | ???       |
| HgBr     | 2.4E7       | see notes                     | 0.                               | ???       |
| HgBr2    | 2.4E7       | see notes                     | 0.                               | ???       |
| ClHgBr   | 2.4E7       | see notes                     | 0.                               | ???       |
| BrHgOBr  | 2.4E7       | see notes                     | 0.                               | ???       |
| ClHgOBr  | 2.4E7       | see notes                     | 0.                               | ???       |
| ClHgOBr  | -9.99999    | ???                           | -9.99999                         | ???       |
| ISON     | -9.99999    | ???                           | -9.99999                         | ???       |
| ISOOH    | -9.99999    | ???                           | -9.99999                         | ???       |
| LTERP    | -9.99999    | ???                           | -9.99999                         | ???       |
| LALK4    | -9.99999    | ???                           | -9.99999                         | ???       |
| LALK5    | -9.99999    | ???                           | -9.99999                         | ???       |
| LARO1    | -9.99999    | ???                           | -9.99999                         | ???       |
| LARO2    | -9.99999    | ???                           | -9.99999                         | ???       |
| LOLE1    | -9.99999    | ???                           | -9.99999                         | ???       |
| LOLE2    | -9.99999    | ???                           | -9.99999                         | ???       |
| LfPOG02  | -9.99999    | ???                           | -9.99999                         | ???       |
| LfPOG03  | -9.99999    | ???                           | -9.99999                         | ???       |
| LfPOG04  | -9.99999    | ???                           | -9.99999                         | ???       |
| LfPOG05  | -9.99999    | ???                           | -9.99999                         | ???       |
| LbbPOG02 | -9.99999    | ???                           | -9.99999                         | ???       |
| LbbPOG03 | -9.99999    | ???                           | -9.99999                         | ???       |

| KPP name   | $H^\ominus$ |           | $\frac{d \ln H^\ominus}{d(1/T)}$ |           |
|------------|-------------|-----------|----------------------------------|-----------|
|            | [M/atm]     | Reference | [K]                              | Reference |
| LbbPOG04   | -9.99999    | ???       | -9.99999                         | ???       |
| LfSOGsv01  | -9.99999    | ???       | -9.99999                         | ???       |
| LfSOGsv02  | -9.99999    | ???       | -9.99999                         | ???       |
| LbbSOGsv01 | -9.99999    | ???       | -9.99999                         | ???       |
| LbbSOGsv02 | -9.99999    | ???       | -9.99999                         | ???       |
| LfSOGiv01  | -9.99999    | ???       | -9.99999                         | ???       |
| LfSOGiv02  | -9.99999    | ???       | -9.99999                         | ???       |
| LfSOGiv03  | -9.99999    | ???       | -9.99999                         | ???       |
| LfSOGiv04  | -9.99999    | ???       | -9.99999                         | ???       |
| LbbSOGiv01 | -9.99999    | ???       | -9.99999                         | ???       |
| LbbSOGiv02 | -9.99999    | ???       | -9.99999                         | ???       |
| LbbSOGiv03 | -9.99999    | ???       | -9.99999                         | ???       |
| LbSOGv01   | -9.99999    | ???       | -9.99999                         | ???       |
| LbSOGv02   | -9.99999    | ???       | -9.99999                         | ???       |
| LbSOGv03   | -9.99999    | ???       | -9.99999                         | ???       |
| LbSOGv04   | -9.99999    | ???       | -9.99999                         | ???       |
| LbOSOGv01  | -9.99999    | ???       | -9.99999                         | ???       |
| LbOSOGv02  | -9.99999    | ???       | -9.99999                         | ???       |
| LbOSOGv03  | -9.99999    | ???       | -9.99999                         | ???       |
| LaSOGv01   | -9.99999    | ???       | -9.99999                         | ???       |
| LaSOGv02   | -9.99999    | ???       | -9.99999                         | ???       |
| LaSOGv03   | -9.99999    | ???       | -9.99999                         | ???       |
| LaSOGv04   | -9.99999    | ???       | -9.99999                         | ???       |
| LaOSOGv01  | -9.99999    | ???       | -9.99999                         | ???       |
| LaOSOGv02  | -9.99999    | ???       | -9.99999                         | ???       |
| LaOSOGv03  | -9.99999    | ???       | -9.99999                         | ???       |

| KPP name   | $k_s$   | Reference |
|------------|---------|-----------|
| O2         | 9.99999 | ???       |
| O3         | 9.99999 | ???       |
| H          | 9.99999 | ???       |
| H2         | 9.99999 | ???       |
| OH         | 9.99999 | ???       |
| HO2        | 9.99999 | ???       |
| H2O        | 9.99999 | ???       |
| H2O2       | 9.99999 | ???       |
| NH3        | 9.99999 | ???       |
| NO         | 9.99999 | ???       |
| NO2        | 9.99999 | ???       |
| NO3        | 9.99999 | ???       |
| N2O5       | 9.99999 | ???       |
| HONO       | 9.99999 | ???       |
| HNO3       | 9.99999 | ???       |
| HNO4       | 9.99999 | ???       |
| NH2        | 9.99999 | ???       |
| HNO        | 9.99999 | ???       |
| NHOH       | 9.99999 | ???       |
| NH2O       | 9.99999 | ???       |
| NH2OH      | 9.99999 | ???       |
| CH4        | 9.99999 | ???       |
| CH3        | 9.99999 | ???       |
| CH3O       | 9.99999 | ???       |
| CO         | 9.99999 | ???       |
| CO2        | 9.99999 | ???       |
| HCHO       | 9.99999 | ???       |
| HCOOH      | 9.99999 | ???       |
| CH3O2      | 9.99999 | ???       |
| HOCH2O2    | 9.99999 | ???       |
| CH3OH      | 9.99999 | ???       |
| CH3OOH     | 9.99999 | ???       |
| HOCH2OOH   | 9.99999 | ???       |
| HOCH2OH    | 9.99999 | ???       |
| CH3ONO     | 9.99999 | ???       |
| CH3NO3     | 9.99999 | ???       |
| CH3O2NO2   | 9.99999 | ???       |
| HOCH2O2NO2 | 9.99999 | ???       |
| HCN        | 9.99999 | ???       |
| CH2CO      | 9.99999 | ???       |
| GLYOX      | 9.99999 | ???       |
| HCOCO2H    | 9.99999 | ???       |
| HCOCO3H    | 9.99999 | ???       |
| CH2CHOH    | 9.99999 | ???       |
| CH3CHO     | 9.99999 | ???       |
| CH3CO2H    | 9.99999 | ???       |
| HOCH2CHO   | 9.99999 | ???       |
| HOCH2CHO   | 9.99999 | ???       |
| CH3CO3H    | 9.99999 | ???       |

| KPP name      | $k_s$   | Reference |
|---------------|---------|-----------|
| HOCH2CO2H     | 9.99999 | ???       |
| HOCH2CO3H     | 9.99999 | ???       |
| HOCH2CO2H     | 9.99999 | ???       |
| HOCH2CO3H     | 9.99999 | ???       |
| C2H5O2        | 9.99999 | ???       |
| C2H5OH        | 9.99999 | ???       |
| C2H5OOH       | 9.99999 | ???       |
| ETHGLY        | 9.99999 | ???       |
| HYETHO2H      | 9.99999 | ???       |
| CH3CHOHOOH    | 9.99999 | ???       |
| NO3CH2PAN     | 9.99999 | ???       |
| CH3CN         | 9.99999 | ???       |
| NO3CH2CHO     | 9.99999 | ???       |
| PAN           | 9.99999 | ???       |
| PHAN          | 9.99999 | ???       |
| ETHOHNO3      | 9.99999 | ???       |
| C2H5NO3       | 9.99999 | ???       |
| C2H5O2NO2     | 9.99999 | ???       |
| OXL           | 9.99999 | ???       |
| C33CO         | 9.99999 | ???       |
| ALCOCH2OOH    | 9.99999 | ???       |
| MGLYOX        | 9.99999 | ???       |
| HOCH2COCHO    | 9.99999 | ???       |
| HCOCH2CHO     | 9.99999 | ???       |
| HCOCH2CO2H    | 9.99999 | ???       |
| HCOCH2CO3H    | 9.99999 | ???       |
| CH3COCH3      | 9.99999 | ???       |
| ACETOL        | 9.99999 | ???       |
| HYPERACET     | 9.99999 | ???       |
| HOC2H4CO2H    | 9.99999 | ???       |
| HOC2H4CO3H    | 9.99999 | ???       |
| IC3H7OOH      | 9.99999 | ???       |
| HYPROPO2H     | 9.99999 | ???       |
| CH3CHCO       | 9.99999 | ???       |
| CH3COCO2H     | 9.99999 | ???       |
| CH3COCO3H     | 9.99999 | ???       |
| HCOCOCH2OOH   | 9.99999 | ???       |
| C2H5CHO       | 9.99999 | ???       |
| PROPENOL      | 9.99999 | ???       |
| C2H5CO2H      | 9.99999 | ???       |
| C2H5CO3H      | 9.99999 | ???       |
| HOCH2COCH2OOH | 9.99999 | ???       |
| IPROPOL       | 9.99999 | ???       |
| NROPOL        | 9.99999 | ???       |
| NC3H7OOH      | 9.99999 | ???       |
| C3DIALOOH     | 9.99999 | ???       |
| METACETHO     | 9.99999 | ???       |
| C32OH13CO     | 9.99999 | ???       |
| HCOCOHCOC3H   | 9.99999 | ???       |

| KPP name      | $k_s$   | Reference |
|---------------|---------|-----------|
| C3PAN2        | 9.99999 | ???       |
| NOA           | 9.99999 | ???       |
| CH3COCH2O2NO2 | 9.99999 | ???       |
| PPN           | 9.99999 | ???       |
| C3PAN1        | 9.99999 | ???       |
| NC3H7NO3      | 9.99999 | ???       |
| IC3H7NO3      | 9.99999 | ???       |
| PROPOLNO3     | 9.99999 | ???       |
| PR2O2HNO3     | 9.99999 | ???       |
| HCOCOHPAN     | 9.99999 | ???       |
| HCOCCH3CO     | 9.99999 | ???       |
| CH3COCHCO     | 9.99999 | ???       |
| C4CODIAL      | 9.99999 | ???       |
| CO23C3CHO     | 9.99999 | ???       |
| C312COCO3H    | 9.99999 | ???       |
| CO2H3CHO      | 9.99999 | ???       |
| BIACETO2      | 9.99999 | ???       |
| CHOC3COO2     | 9.99999 | ???       |
| MACR          | 9.99999 | ???       |
| MVK           | 9.99999 | ???       |
| BIACET        | 9.99999 | ???       |
| MACO2H        | 9.99999 | ???       |
| HVMK          | 9.99999 | ???       |
| HMAC          | 9.99999 | ???       |
| CO2C3CHO      | 9.99999 | ???       |
| IBUTDIAL      | 9.99999 | ???       |
| MACO3H        | 9.99999 | ???       |
| BIACETOH      | 9.99999 | ???       |
| CH3COOHCHCHO  | 9.99999 | ???       |
| HCOCCH3CHOOH  | 9.99999 | ???       |
| C413COOOH     | 9.99999 | ???       |
| BIACETOOH     | 9.99999 | ???       |
| CH3COCOCO2H   | 9.99999 | ???       |
| CO2H3CO2H     | 9.99999 | ???       |
| C44OOH        | 9.99999 | ???       |
| CO2H3CO3H     | 9.99999 | ???       |
| MACRN         | 9.99999 | ???       |
| MVKNO3        | 9.99999 | ???       |
| PIPN          | 9.99999 | ???       |
| MEK           | 9.99999 | ???       |
| HO12CO3C4     | 9.99999 | ???       |
| MACROH        | 9.99999 | ???       |
| MACROOH       | 9.99999 | ???       |
| BUTENOL       | 9.99999 | ???       |
| C3H7CHO       | 9.99999 | ???       |
| IPRCHO        | 9.99999 | ???       |
| MPROPENOL     | 9.99999 | ???       |
| IBUTALOH      | 9.99999 | ???       |
| BUT2OLO       | 9.99999 | ???       |

| KPP name      | $k_s$   | Reference |
|---------------|---------|-----------|
| PERIBUACID    | 9.99999 | ???       |
| IPRHOCO2H     | 9.99999 | ???       |
| IPRHOCO3H     | 9.99999 | ???       |
| IC4H9NO3      | 9.99999 | ???       |
| TC4H9NO3      | 9.99999 | ???       |
| BUT2OLNO3     | 9.99999 | ???       |
| TC4H9OOH      | 9.99999 | ???       |
| IC4H9OOH      | 9.99999 | ???       |
| IBUTOLBOOH    | 9.99999 | ???       |
| BUT2OLOOH     | 9.99999 | ???       |
| MALANHY       | 9.99999 | ???       |
| CO2C4DIAL     | 9.99999 | ???       |
| MALNHYOHCO    | 9.99999 | ???       |
| BZFUONE       | 9.99999 | ???       |
| MALDIAL       | 9.99999 | ???       |
| MALDALCO2H    | 9.99999 | ???       |
| EPXC4DIAL     | 9.99999 | ???       |
| HOCOC4DIAL    | 9.99999 | ???       |
| MALDALCO3H    | 9.99999 | ???       |
| BZFUCO        | 9.99999 | ???       |
| EPXDLCO2H     | 9.99999 | ???       |
| CO14O3CHO     | 9.99999 | ???       |
| CO14O3CO2H    | 9.99999 | ???       |
| EPXDLCO3H     | 9.99999 | ???       |
| MALANHYOOH    | 9.99999 | ???       |
| MALDIALOOH    | 9.99999 | ???       |
| BZFUOOH       | 9.99999 | ???       |
| MECOACEOOH    | 9.99999 | ???       |
| C312COPAN     | 9.99999 | ???       |
| MPAN          | 9.99999 | ???       |
| IBUTOLBNO3    | 9.99999 | ???       |
| C4PAN5        | 9.99999 | ???       |
| NC4DCO2H      | 9.99999 | ???       |
| MALDIALPAN    | 9.99999 | ???       |
| NBZFUONE      | 9.99999 | ???       |
| EPXDLPAN      | 9.99999 | ???       |
| NBZFUOOH      | 9.99999 | ???       |
| LMEKOOH       | 9.99999 | ???       |
| LHMKABOOH     | 9.99999 | ???       |
| LC4H9OOH      | 9.99999 | ???       |
| LBUT1ENOOH    | 9.99999 | ???       |
| LMEKNO3       | 9.99999 | ???       |
| LC4H9NO3      | 9.99999 | ???       |
| LBUT1ENNO3    | 9.99999 | ???       |
| ME3FURAN      | 9.99999 | ???       |
| ZCODC23DBCOD  | 9.99999 | ???       |
| CO13C4CHO     | 9.99999 | ???       |
| CO23C4CHO     | 9.99999 | ???       |
| ZCO3HC23DBCOD | 9.99999 | ???       |



| KPP name       | $k_s$   | Reference |
|----------------|---------|-----------|
| C513CO         | 9.99999 | ???       |
| CHOC3COOOH     | 9.99999 | ???       |
| CO23C4CO3H     | 9.99999 | ???       |
| C5H8           | 9.99999 | ???       |
| HCOC5          | 9.99999 | ???       |
| ZCODC23DBC00H  | 9.99999 | ???       |
| MBOCOCO        | 9.99999 | ???       |
| C511OOH        | 9.99999 | ???       |
| C514OOH        | 9.99999 | ???       |
| C512OOH        | 9.99999 | ???       |
| C1ODC2OOHC4OD  | 9.99999 | ???       |
| C513OOH        | 9.99999 | ???       |
| C1ODC2O2C4OOH  | 9.99999 | ???       |
| C1ODC3O2C4OOH  | 9.99999 | ???       |
| MBO            | 9.99999 | ???       |
| ISOPAOH        | 9.99999 | ???       |
| ISOPBOH        | 9.99999 | ???       |
| ISOPDOH        | 9.99999 | ???       |
| ISOPBOOH       | 9.99999 | ???       |
| ISOPDOOH       | 9.99999 | ???       |
| MBOACO         | 9.99999 | ???       |
| DB1OOH         | 9.99999 | ???       |
| C59OOH         | 9.99999 | ???       |
| C1OOHC2OOHC4OD | 9.99999 | ???       |
| DB2OOH         | 9.99999 | ???       |
| C4CO2DBCO3     | 9.99999 | ???       |
| MMALANHY       | 9.99999 | ???       |
| C54CO          | 9.99999 | ???       |
| C4CO2DCO3H     | 9.99999 | ???       |
| C5DIALCO       | 9.99999 | ???       |
| ACCOMECO3      | 9.99999 | ???       |
| MMALANHYO2     | 9.99999 | ???       |
| TLFUONE        | 9.99999 | ???       |
| C5DICARB       | 9.99999 | ???       |
| MC3ODBCO2H     | 9.99999 | ???       |
| C5CO14OH       | 9.99999 | ???       |
| C5134CO2OH     | 9.99999 | ???       |
| C5DIALOOH      | 9.99999 | ???       |
| ACCOMEOCHO     | 9.99999 | ???       |
| C5CO14OOH      | 9.99999 | ???       |
| C24O3CCO2H     | 9.99999 | ???       |
| MMALNHYOOH     | 9.99999 | ???       |
| ACCOMECO3H     | 9.99999 | ???       |
| TLFUOOH        | 9.99999 | ???       |
| C5DICAROOH     | 9.99999 | ???       |
| CHOC3COPAN     | 9.99999 | ???       |
| ZCPANC23DBCOD  | 9.99999 | ???       |
| C5PAN9         | 9.99999 | ???       |
| NC4CHO         | 9.99999 | ???       |

| KPP name   | $k_s$   | Reference |
|------------|---------|-----------|
| C514NO3    | 9.99999 | ???       |
| NC4OHCPAN  | 9.99999 | ???       |
| ISOPBNO3   | 9.99999 | ???       |
| ISOPDNO3   | 9.99999 | ???       |
| NISOPOOH   | 9.99999 | ???       |
| NMBOBCO    | 9.99999 | ???       |
| C4MCONO3OH | 9.99999 | ???       |
| DB1NO3     | 9.99999 | ???       |
| NC4OHCO3H  | 9.99999 | ???       |
| C4CO2DBPAN | 9.99999 | ???       |
| NC4MDCO2H  | 9.99999 | ???       |
| C5COO2NO2  | 9.99999 | ???       |
| ACCOMEPAN  | 9.99999 | ???       |
| NTLFUOOH   | 9.99999 | ???       |
| LHC4ACCHO  | 9.99999 | ???       |
| LHC4ACCO2H | 9.99999 | ???       |
| LHC4ACCO3H | 9.99999 | ???       |
| LIEPOX     | 9.99999 | ???       |
| LISOPACOOH | 9.99999 | ???       |
| LC578OOH   | 9.99999 | ???       |
| LMBOABOOH  | 9.99999 | ???       |
| LC5PAN1719 | 9.99999 | ???       |
| LISOPACNO3 | 9.99999 | ???       |
| LNMBOABOOH | 9.99999 | ???       |
| LMBOABNO3  | 9.99999 | ???       |
| LNISOOH    | 9.99999 | ???       |
| C614CO     | 9.99999 | ???       |
| CO235C6OOH | 9.99999 | ???       |
| C614OOH    | 9.99999 | ???       |
| PBZQONE    | 9.99999 | ???       |
| CATECHOL   | 9.99999 | ???       |
| C6CO4DB    | 9.99999 | ???       |
| PBZQCO     | 9.99999 | ???       |
| C6H5O      | 9.99999 | ???       |
| CATEC1O    | 9.99999 | ???       |
| C5CO2DBC03 | 9.99999 | ???       |
| C5CO2DCO3H | 9.99999 | ???       |
| C5CO2OHCO3 | 9.99999 | ???       |
| BENZENE    | 9.99999 | ???       |
| PHENOL     | 9.99999 | ???       |
| C6H5OOH    | 9.99999 | ???       |
| BZEPOXMUC  | 9.99999 | ???       |
| C6125CO    | 9.99999 | ???       |
| CATEC1OOH  | 9.99999 | ???       |
| BZEMUCCO2H | 9.99999 | ???       |
| BZOBIPEROH | 9.99999 | ???       |
| BZEMUCCO   | 9.99999 | ???       |
| PBZQOOH    | 9.99999 | ???       |
| BZEMUCCO3H | 9.99999 | ???       |

| KPP name   | $k_s$   | Reference |
|------------|---------|-----------|
| C5COOHCO3H | 9.99999 | ???       |
| C615CO2OOH | 9.99999 | ???       |
| BZBIPEROOH | 9.99999 | ???       |
| PHENOOH    | 9.99999 | ???       |
| BZEMUCOOH  | 9.99999 | ???       |
| C614NO3    | 9.99999 | ???       |
| NPHEN1O    | 9.99999 | ???       |
| DNPHEN     | 9.99999 | ???       |
| HOC6H4NO2  | 9.99999 | ???       |
| NCATECHOL  | 9.99999 | ???       |
| NPHEN1OOH  | 9.99999 | ???       |
| BZEMUCPAN  | 9.99999 | ???       |
| C5CO2DBPAN | 9.99999 | ???       |
| NBZQOOH    | 9.99999 | ???       |
| C5CO2OHPAN | 9.99999 | ???       |
| NDNPHENOOH | 9.99999 | ???       |
| DNPHENOOH  | 9.99999 | ???       |
| NNCATECOOH | 9.99999 | ???       |
| BZBIPERNO3 | 9.99999 | ???       |
| BZEMUCNO3  | 9.99999 | ???       |
| NPHENOOH   | 9.99999 | ???       |
| NCATECOOH  | 9.99999 | ???       |
| CO235C6CHO | 9.99999 | ???       |
| C235C6CO3H | 9.99999 | ???       |
| C716OOH    | 9.99999 | ???       |
| C721OOH    | 9.99999 | ???       |
| C722OOH    | 9.99999 | ???       |
| BENZAL     | 9.99999 | ???       |
| PHCOOH     | 9.99999 | ???       |
| PTLQONE    | 9.99999 | ???       |
| C6H5CO3H   | 9.99999 | ???       |
| C7CO4DB    | 9.99999 | ???       |
| PTLQCO     | 9.99999 | ???       |
| TOL1O      | 9.99999 | ???       |
| MCATEC1O   | 9.99999 | ???       |
| TOLUENE    | 9.99999 | ???       |
| CRESOL     | 9.99999 | ???       |
| OXYL1OOH   | 9.99999 | ???       |
| C6H5CH2OOH | 9.99999 | ???       |
| MCATECHOL  | 9.99999 | ???       |
| TLEPOXMUC  | 9.99999 | ???       |
| MCATEC1OOH | 9.99999 | ???       |
| TLEMUCCO2H | 9.99999 | ???       |
| TLOBIPEROH | 9.99999 | ???       |
| PTLQOOH    | 9.99999 | ???       |
| TLEMUCCO   | 9.99999 | ???       |
| TLEMUCCO3H | 9.99999 | ???       |
| C6COOHCO3H | 9.99999 | ???       |
| TLBIPEROOH | 9.99999 | ???       |

| KPP name   | $k_s$   | Reference |
|------------|---------|-----------|
| CRESOOH    | 9.99999 | ???       |
| TLEMUCOOH  | 9.99999 | ???       |
| C7PAN3     | 9.99999 | ???       |
| PBZN       | 9.99999 | ???       |
| NCRES1O    | 9.99999 | ???       |
| DNCRES     | 9.99999 | ???       |
| TOL1OHNO2  | 9.99999 | ???       |
| C6H5CH2NO3 | 9.99999 | ???       |
| MNCATECH   | 9.99999 | ???       |
| NCRES1OOH  | 9.99999 | ???       |
| NPTLQOOH   | 9.99999 | ???       |
| TLEMUCPAN  | 9.99999 | ???       |
| C6CO2OHPAN | 9.99999 | ???       |
| NDNCRESOOH | 9.99999 | ???       |
| DNCRESOOH  | 9.99999 | ???       |
| MNNCATCOOH | 9.99999 | ???       |
| TLBIPERNO3 | 9.99999 | ???       |
| TLEMUCNO3  | 9.99999 | ???       |
| NCRESOOH   | 9.99999 | ???       |
| MNCATECOOH | 9.99999 | ???       |
| C8BCCO     | 9.99999 | ???       |
| C8BCOOH    | 9.99999 | ???       |
| C721CHO    | 9.99999 | ???       |
| NORPINIC   | 9.99999 | ???       |
| C721CO3H   | 9.99999 | ???       |
| C8BC       | 9.99999 | ???       |
| C85OOH     | 9.99999 | ???       |
| C86OOH     | 9.99999 | ???       |
| C812OOH    | 9.99999 | ???       |
| C813OOH    | 9.99999 | ???       |
| C89OOH     | 9.99999 | ???       |
| C810OOH    | 9.99999 | ???       |
| STYRENE    | 9.99999 | ???       |
| LXYL       | 9.99999 | ???       |
| EBENZ      | 9.99999 | ???       |
| STYRENOOH  | 9.99999 | ???       |
| C8BCNO3    | 9.99999 | ???       |
| C721PAN    | 9.99999 | ???       |
| C89NO3     | 9.99999 | ???       |
| C810NO3    | 9.99999 | ???       |
| NSTYRENOOH | 9.99999 | ???       |
| NOPINDCO   | 9.99999 | ???       |
| C85CO3H    | 9.99999 | ???       |
| NOPINONE   | 9.99999 | ???       |
| NOPINOO    | 9.99999 | ???       |
| NORPINAL   | 9.99999 | ???       |
| NORPINENOL | 9.99999 | ???       |
| C89CO2H    | 9.99999 | ???       |
| NOPINDOOH  | 9.99999 | ???       |

| KPP name       | $k_s$   | Reference |
|----------------|---------|-----------|
| RO6R3P         | 9.99999 | ???       |
| C89CO3H        | 9.99999 | ???       |
| PINIC          | 9.99999 | ???       |
| C811CO3H       | 9.99999 | ???       |
| C96OOH         | 9.99999 | ???       |
| C97OOH         | 9.99999 | ???       |
| C98OOH         | 9.99999 | ???       |
| C89PAN         | 9.99999 | ???       |
| C9PAN2         | 9.99999 | ???       |
| C811PAN        | 9.99999 | ???       |
| C96NO3         | 9.99999 | ???       |
| LTMB           | 9.99999 | ???       |
| C109CO         | 9.99999 | ???       |
| PINALOOH       | 9.99999 | ???       |
| APINENE        | 9.99999 | ???       |
| BPINENE        | 9.99999 | ???       |
| CARENE         | 9.99999 | ???       |
| SABINENE       | 9.99999 | ???       |
| CAMPHENE       | 9.99999 | ???       |
| PINAL          | 9.99999 | ???       |
| PINENOL        | 9.99999 | ???       |
| MENTHEN6ONE    | 9.99999 | ???       |
| PINONIC        | 9.99999 | ???       |
| C109OOH        | 9.99999 | ???       |
| PERPINONIC     | 9.99999 | ???       |
| C106OOH        | 9.99999 | ???       |
| OH2MENTHEN6ONE | 9.99999 | ???       |
| BPINAOOH       | 9.99999 | ???       |
| RO6R3OOH       | 9.99999 | ???       |
| PINALNO3       | 9.99999 | ???       |
| C10PAN2        | 9.99999 | ???       |
| C106NO3        | 9.99999 | ???       |
| BPINANO3       | 9.99999 | ???       |
| RO6R1NO3       | 9.99999 | ???       |
| RO6R3NO3       | 9.99999 | ???       |
| ROO6R1NO3      | 9.99999 | ???       |
| LAPINABOOH     | 9.99999 | ???       |
| LAPINABNO3     | 9.99999 | ???       |
| LNAPINABOOH    | 9.99999 | ???       |
| LNBPINABOOH    | 9.99999 | ???       |
| LHAROM         | 9.99999 | ???       |
| CHF3           | 9.99999 | ???       |
| CHF2CF3        | 9.99999 | ???       |
| CH3CF3         | 9.99999 | ???       |
| CH2F2          | 9.99999 | ???       |
| CH3CHF2        | 9.99999 | ???       |
| Cl2            | 9.99999 | ???       |
| HCl            | 9.99999 | ???       |
| HOCl           | 9.99999 | ???       |

| KPP name   | $k_s$   | Reference |
|------------|---------|-----------|
| ClNO3      | 9.99999 | ???       |
| CH3Cl      | 9.99999 | ???       |
| CHF2Cl     | 9.99999 | ???       |
| CH2FCF3    | 9.99999 | ???       |
| CF2ClCFC12 | 9.99999 | ???       |
| CH2Cl2     | 9.99999 | ???       |
| CH3CFC12   | 9.99999 | ???       |
| CF2ClCF2Cl | 9.99999 | ???       |
| CHCl3      | 9.99999 | ???       |
| CF3CF2Cl   | 9.99999 | ???       |
| Br2        | 9.99999 | ???       |
| HBr        | 9.99999 | ???       |
| HOBr       | 9.99999 | ???       |
| BrNO3      | 9.99999 | ???       |
| BrCl       | 9.99999 | ???       |
| CH3Br      | 9.99999 | ???       |
| CHCl2Br    | 9.99999 | ???       |
| CHClBr2    | 9.99999 | ???       |
| CH2ClBr    | 9.99999 | ???       |
| CH2Br2     | 9.99999 | ???       |
| CHBr3      | 9.99999 | ???       |
| I2         | 9.99999 | ???       |
| IO         | 9.99999 | ???       |
| OIO        | 9.99999 | ???       |
| I2O2       | 9.99999 | ???       |
| HI         | 9.99999 | ???       |
| HOI        | 9.99999 | ???       |
| HIO3       | 9.99999 | ???       |
| INO2       | 9.99999 | ???       |
| INO3       | 9.99999 | ???       |
| ICl        | 9.99999 | ???       |
| CH2ClI     | 9.99999 | ???       |
| IBr        | 9.99999 | ???       |
| SO2        | 9.99999 | ???       |
| H2SO4      | 9.99999 | ???       |
| CH3SO3H    | 9.99999 | ???       |
| DMS        | 9.99999 | ???       |
| DMSO       | 9.99999 | ???       |
| CH3SO2     | 9.99999 | ???       |
| CH3SO3     | 9.99999 | ???       |
| Hg         | 9.99999 | ???       |
| HgO        | 9.99999 | ???       |
| HgCl       | 9.99999 | ???       |
| HgCl2      | 9.99999 | ???       |
| HgBr       | 9.99999 | ???       |
| HgBr2      | 9.99999 | ???       |
| ClHgBr     | 9.99999 | ???       |
| BrHgOBr    | 9.99999 | ???       |
| ClHgOBr    | 9.99999 | ???       |

| KPP name   | $k_s$   | Reference |
|------------|---------|-----------|
| ClHgOBr    | 9.99999 | ???       |
| ISON       | 9.99999 | ???       |
| ISOOH      | 9.99999 | ???       |
| LTERP      | 9.99999 | ???       |
| LALK4      | 9.99999 | ???       |
| LALK5      | 9.99999 | ???       |
| LARO1      | 9.99999 | ???       |
| LARO2      | 9.99999 | ???       |
| LOLE1      | 9.99999 | ???       |
| LOLE2      | 9.99999 | ???       |
| LfPOG02    | 9.99999 | ???       |
| LfPOG03    | 9.99999 | ???       |
| LfPOG04    | 9.99999 | ???       |
| LfPOG05    | 9.99999 | ???       |
| LbbPOG02   | 9.99999 | ???       |
| LbbPOG03   | 9.99999 | ???       |
| LbbPOG04   | 9.99999 | ???       |
| LfSOGsv01  | 9.99999 | ???       |
| LfSOGsv02  | 9.99999 | ???       |
| LbbSOGsv01 | 9.99999 | ???       |
| LbbSOGsv02 | 9.99999 | ???       |
| LfSOGiv01  | 9.99999 | ???       |
| LfSOGiv02  | 9.99999 | ???       |
| LfSOGiv03  | 9.99999 | ???       |
| LfSOGiv04  | 9.99999 | ???       |
| LbbSOGiv01 | 9.99999 | ???       |
| LbbSOGiv02 | 9.99999 | ???       |
| LbbSOGiv03 | 9.99999 | ???       |
| LbSOGv01   | 9.99999 | ???       |
| LbSOGv02   | 9.99999 | ???       |
| LbSOGv03   | 9.99999 | ???       |
| LbSOGv04   | 9.99999 | ???       |
| LbOSOGv01  | 9.99999 | ???       |
| LbOSOGv02  | 9.99999 | ???       |
| LbOSOGv03  | 9.99999 | ???       |
| LaSOGv01   | 9.99999 | ???       |
| LaSOGv02   | 9.99999 | ???       |
| LaSOGv03   | 9.99999 | ???       |
| LaSOGv04   | 9.99999 | ???       |
| LaOSOGv01  | 9.99999 | ???       |
| LaOSOGv02  | 9.99999 | ???       |
| LaOSOGv03  | 9.99999 | ???       |

| KPP name   | $\alpha^{\ominus}$ | Reference                    | $\alpha$ -T-dep | Reference |
|------------|--------------------|------------------------------|-----------------|-----------|
| O2         | 0.01               | see notes                    | 2000.           | ???       |
| O3         | 0.002              | DeMore et al. (1997)         | 0.              | ???       |
| H          | 0.1                | see notes                    | 0.              | ???       |
| H2         | 0.1                | see notes                    | 0.              | ???       |
| OH         | 0.01               | Takami et al. (1998)         | 0.              | ???       |
| HO2        | 0.5                | Thornton and Abbatt (2005)   | 0.              | ???       |
| H2O        | 0.0                | see notes                    | 0.              | ???       |
| H2O2       | 0.077              | Worsnop et al. (1989)        | 3127.           | ???       |
| NH3        | 0.06               | DeMore et al. (1997)         | 0.              | ???       |
| NO         | 5.0E-5             | Saastad et al. (1993)        | 0.              | ???       |
| NO2        | 0.0015             | Ponche et al. (1993)         | 0.              | ???       |
| NO3        | 0.04               | Rudich et al. (1996)         | 0.              | ???       |
| N2O5       | 0.1                | see notes                    | 0.              | ???       |
| HONO       | 0.04               | DeMore et al. (1997)         | 0.              | ???       |
| HNO3       | 0.5                | Abbatt and Waschewsky (1998) | 0.              | ???       |
| HNO4       | 0.1                | see notes                    | 0.              | ???       |
| NH2        | 0.1                | see notes                    | 0.              | ???       |
| HNO        | 0.1                | see notes                    | 0.              | ???       |
| NHOH       | 0.1                | see notes                    | 0.              | ???       |
| NH2O       | 0.1                | see notes                    | 0.              | ???       |
| NH2OH      | 0.1                | see notes                    | 0.              | ???       |
| CH4        | 0.1                | see notes                    | 0.              | ???       |
| CH3        | 0.1                | see notes                    | 0.              | ???       |
| CH3O       | 0.1                | see notes                    | 0.              | ???       |
| CO         | 0.1                | see notes                    | 0.              | ???       |
| CO2        | 0.01               | see notes                    | 2000.           | ???       |
| HCHO       | 0.04               | DeMore et al. (1997)         | 0.              | ???       |
| HCOOH      | 0.014              | DeMore et al. (1997)         | 3978.           | ???       |
| CH3O2      | 0.01               | see notes                    | 2000.           | ???       |
| HOCH2O2    | 0.1                | see notes                    | 0.              | ???       |
| CH3OH      | 0.1                | see notes                    | 0.              | ???       |
| CH3OOH     | 0.0046             | Magi et al. (1997)           | 3273.           | ???       |
| HOCH2OOH   | 0.1                | see notes                    | 0.              | ???       |
| HOCH2OH    | 0.1                | see notes                    | 0.              | ???       |
| CH3ONO     | 0.1                | see notes                    | 0.              | ???       |
| CH3NO3     | 0.1                | see notes                    | 0.              | ???       |
| CH3O2NO2   | 0.1                | see notes                    | 0.              | ???       |
| HOCH2O2NO2 | 0.1                | see notes                    | 0.              | ???       |
| HCN        | 0.1                | see notes                    | 0.              | ???       |
| CH2CO      | 0.1                | see notes                    | 0.              | ???       |
| GLYOX      | 0.1                | see notes                    | 0.              | ???       |
| HCOCO2H    | 0.1                | see notes                    | 0.              | ???       |
| HCOCO3H    | 0.1                | see notes                    | 0.              | ???       |
| CH2CHOH    | 0.1                | see notes                    | 0.              | ???       |
| CH3CHO     | 3.0E-2             | see notes                    | 0.              | ???       |
| CH3CO2H    | 2.0E-2             | Davidovits et al. (1995)     | 4079.           | ???       |
| HOCH2CHO   | 0.1                | see notes                    | 0.              | ???       |
| HOCH2CHO   | 0.1                | see notes                    | 0.              | ???       |
| CH3CO3H    | 0.1                | see notes                    | 0.              | ???       |



| KPP name      | $\alpha^\ominus$ | Reference                | $\alpha$ -T-dep | Reference |
|---------------|------------------|--------------------------|-----------------|-----------|
| HOCH2CO2H     | 0.1              | see notes                | 0.              | ???       |
| HOCH2CO3H     | 0.1              | see notes                | 0.              | ???       |
| HOCH2CO2H     | 0.1              | see notes                | 0.              | ???       |
| HOCH2CO3H     | 0.1              | see notes                | 0.              | ???       |
| C2H5O2        | 0.1              | see notes                | 0.              | ???       |
| C2H5OH        | 0.1              | see notes                | 0.              | ???       |
| C2H5OOH       | 0.1              | see notes                | 0.              | ???       |
| ETHGLY        | 0.1              | see notes                | 0.              | ???       |
| HYETHO2H      | 0.1              | see notes                | 0.              | ???       |
| CH3CHOHOOH    | 0.1              | see notes                | 0.              | ???       |
| NO3CH2PAN     | 0.1              | see notes                | 0.              | ???       |
| CH3CN         | 0.1              | see notes                | 0.              | ???       |
| NO3CH2CHO     | 0.1              | see notes                | 0.              | ???       |
| PAN           | 0.1              | see notes                | 0.              | ???       |
| PHAN          | 0.1              | see notes                | 0.              | ???       |
| ETHOHNO3      | 0.1              | see notes                | 0.              | ???       |
| C2H5NO3       | 0.1              | see notes                | 0.              | ???       |
| C2H5O2NO2     | 0.1              | see notes                | 0.              | ???       |
| OXL           | 0.1              | see notes                | 0.              | ???       |
| C33CO         | 0.1              | see notes                | 0.              | ???       |
| ALCOCH2OOH    | 0.1              | see notes                | 0.              | ???       |
| MGLYOX        | 0.1              | see notes                | 0.              | ???       |
| HOCH2COCHO    | 0.1              | see notes                | 0.              | ???       |
| HCOCH2CHO     | 0.1              | see notes                | 0.              | ???       |
| HCOCH2CO2H    | 0.1              | see notes                | 0.              | ???       |
| HCOCH2CO3H    | 0.1              | see notes                | 0.              | ???       |
| CH3COCH3      | 3.72E-3          | Davidovits et al. (1995) | 6395.           | ???       |
| ACETOL        | 0.1              | see notes                | 0.              | ???       |
| HYPERACET     | 0.1              | see notes                | 0.              | ???       |
| HOC2H4CO2H    | 0.1              | see notes                | 0.              | ???       |
| HOC2H4CO3H    | 0.1              | see notes                | 0.              | ???       |
| IC3H7OOH      | 0.1              | see notes                | 0.              | ???       |
| HYPROPO2H     | 0.1              | see notes                | 0.              | ???       |
| CH3CHCO       | 0.1              | see notes                | 0.              | ???       |
| CH3COCO2H     | 0.1              | see notes                | 0.              | ???       |
| CH3COCO3H     | 0.1              | see notes                | 0.              | ???       |
| HCOCOCH2OOH   | 0.1              | see notes                | 0.              | ???       |
| C2H5CHO       | 0.1              | see notes                | 0.              | ???       |
| PROPENOL      | 0.1              | see notes                | 0.              | ???       |
| C2H5CO2H      | 0.1              | see notes                | 0.              | ???       |
| C2H5CO3H      | 0.1              | see notes                | 0.              | ???       |
| HOCH2COCH2OOH | 0.1              | see notes                | 0.              | ???       |
| IPROPOL       | 0.1              | see notes                | 0.              | ???       |
| NROPOL        | 0.1              | see notes                | 0.              | ???       |
| NC3H7OOH      | 0.1              | see notes                | 0.              | ???       |
| C3DIALOOH     | 0.1              | see notes                | 0.              | ???       |
| METACETHO     | 0.1              | see notes                | 0.              | ???       |
| C32OH13CO     | 0.1              | see notes                | 0.              | ???       |
| HCOCOCHCO3H   | 0.1              | see notes                | 0.              | ???       |

| KPP name      | $\alpha^\ominus$ | Reference | $\alpha$ -T-dep | Reference |
|---------------|------------------|-----------|-----------------|-----------|
| C3PAN2        | 0.1              | see notes | 0.              | ???       |
| NOA           | 0.1              | see notes | 0.              | ???       |
| CH3COCH2O2NO2 | 0.1              | see notes | 0.              | ???       |
| PPN           | 0.1              | see notes | 0.              | ???       |
| C3PAN1        | 0.1              | see notes | 0.              | ???       |
| NC3H7NO3      | 0.1              | see notes | 0.              | ???       |
| IC3H7NO3      | 0.1              | see notes | 0.              | ???       |
| PROPOLNO3     | 0.1              | see notes | 0.              | ???       |
| PR2O2HNO3     | 0.1              | see notes | 0.              | ???       |
| HCOCOHPAN     | 0.1              | see notes | 0.              | ???       |
| HCOCCCH3CO    | 0.1              | see notes | 0.              | ???       |
| CH3COCHCO     | 0.1              | see notes | 0.              | ???       |
| C4CODIAL      | 0.1              | see notes | 0.              | ???       |
| CO23C3CHO     | 0.1              | see notes | 0.              | ???       |
| C312COCO3H    | 0.1              | see notes | 0.              | ???       |
| CO2H3CHO      | 0.1              | see notes | 0.              | ???       |
| BIACETO2      | 0.1              | see notes | 0.              | ???       |
| CHOC3COO2     | 0.1              | see notes | 0.              | ???       |
| MACR          | 0.1              | see notes | 0.              | ???       |
| MVK           | 0.1              | see notes | 0.              | ???       |
| BIACET        | 0.1              | see notes | 0.              | ???       |
| MACO2H        | 0.1              | see notes | 0.              | ???       |
| HVMK          | 0.1              | see notes | 0.              | ???       |
| HMAC          | 0.1              | see notes | 0.              | ???       |
| CO2C3CHO      | 0.1              | see notes | 0.              | ???       |
| IBUTDIAL      | 0.1              | see notes | 0.              | ???       |
| MACO3H        | 0.1              | see notes | 0.              | ???       |
| BIACETOH      | 0.1              | see notes | 0.              | ???       |
| CH3COOHCHCHO  | 0.1              | see notes | 0.              | ???       |
| HCOCCCH3CHOOH | 0.1              | see notes | 0.              | ???       |
| C413COOOH     | 0.1              | see notes | 0.              | ???       |
| BIACETOOH     | 0.1              | see notes | 0.              | ???       |
| CH3COCOCO2H   | 0.1              | see notes | 0.              | ???       |
| CO2H3CO2H     | 0.1              | see notes | 0.              | ???       |
| C44OOH        | 0.1              | see notes | 0.              | ???       |
| CO2H3CO3H     | 0.1              | see notes | 0.              | ???       |
| MACRN         | 0.1              | see notes | 0.              | ???       |
| MVKNO3        | 0.1              | see notes | 0.              | ???       |
| PIPN          | 0.1              | see notes | 0.              | ???       |
| MEK           | 0.1              | see notes | 0.              | ???       |
| HO12CO3C4     | 0.1              | see notes | 0.              | ???       |
| MACROH        | 0.1              | see notes | 0.              | ???       |
| MACROOH       | 0.1              | see notes | 0.              | ???       |
| BUTENOL       | 0.1              | see notes | 0.              | ???       |
| C3H7CHO       | 0.1              | see notes | 0.              | ???       |
| IPRCHO        | 0.1              | see notes | 0.              | ???       |
| MPROPENOL     | 0.1              | see notes | 0.              | ???       |
| IBUTALOH      | 0.1              | see notes | 0.              | ???       |
| BUT2OLO       | 0.1              | see notes | 0.              | ???       |

| KPP name      | $\alpha^\ominus$ | Reference | $\alpha$ -T-dep | Reference |
|---------------|------------------|-----------|-----------------|-----------|
| PERIBUACID    | 0.1              | see notes | 0.              | ???       |
| IPRHOCO2H     | 0.1              | see notes | 0.              | ???       |
| IPRHOCO3H     | 0.1              | see notes | 0.              | ???       |
| IC4H9NO3      | 0.1              | see notes | 0.              | ???       |
| TC4H9NO3      | 0.1              | see notes | 0.              | ???       |
| BUT2OLNO3     | 0.1              | see notes | 0.              | ???       |
| TC4H9OOH      | 0.1              | see notes | 0.              | ???       |
| IC4H9OOH      | 0.1              | see notes | 0.              | ???       |
| IBUTOLBOOH    | 0.1              | see notes | 0.              | ???       |
| BUT2OLOOH     | 0.1              | see notes | 0.              | ???       |
| MALANHY       | 0.1              | see notes | 0.              | ???       |
| CO2C4DIAL     | 0.1              | see notes | 0.              | ???       |
| MALNHYOHCO    | 0.1              | see notes | 0.              | ???       |
| BZFUONE       | 0.1              | see notes | 0.              | ???       |
| MALDIAL       | 0.1              | see notes | 0.              | ???       |
| MALDALCO2H    | 0.1              | see notes | 0.              | ???       |
| EPXC4DIAL     | 0.1              | see notes | 0.              | ???       |
| HOCOC4DIAL    | 0.1              | see notes | 0.              | ???       |
| MALDALCO3H    | 0.1              | see notes | 0.              | ???       |
| BZFUCO        | 0.1              | see notes | 0.              | ???       |
| EPXDLCO2H     | 0.1              | see notes | 0.              | ???       |
| CO14O3CHO     | 0.1              | see notes | 0.              | ???       |
| CO14O3CO2H    | 0.1              | see notes | 0.              | ???       |
| EPXDLCO3H     | 0.1              | see notes | 0.              | ???       |
| MALANHYOOH    | 0.1              | see notes | 0.              | ???       |
| MALDIALOOH    | 0.1              | see notes | 0.              | ???       |
| BZFUOOH       | 0.1              | see notes | 0.              | ???       |
| MECOACEOOH    | 0.1              | see notes | 0.              | ???       |
| C312COPAN     | 0.1              | see notes | 0.              | ???       |
| MPAN          | 0.1              | see notes | 0.              | ???       |
| IBUTOLBNO3    | 0.1              | see notes | 0.              | ???       |
| C4PAN5        | 0.1              | see notes | 0.              | ???       |
| NC4DCO2H      | 0.1              | see notes | 0.              | ???       |
| MALDIALPAN    | 0.1              | see notes | 0.              | ???       |
| NBZFUONE      | 0.1              | see notes | 0.              | ???       |
| EPXDLPAN      | 0.1              | see notes | 0.              | ???       |
| NBZFUOOH      | 0.1              | see notes | 0.              | ???       |
| LMEKOOH       | 0.1              | see notes | 0.              | ???       |
| LHMVKABOOH    | 0.1              | see notes | 0.              | ???       |
| LC4H9OOH      | 0.1              | see notes | 0.              | ???       |
| LBUT1ENOOH    | 0.1              | see notes | 0.              | ???       |
| LMEKNO3       | 0.1              | see notes | 0.              | ???       |
| LC4H9NO3      | 0.1              | see notes | 0.              | ???       |
| LBUT1ENNO3    | 0.1              | see notes | 0.              | ???       |
| ME3FURAN      | 0.1              | see notes | 0.              | ???       |
| ZCODC23DBCOD  | 0.1              | see notes | 0.              | ???       |
| CO13C4CHO     | 0.1              | see notes | 0.              | ???       |
| CO23C4CHO     | 0.1              | see notes | 0.              | ???       |
| ZCO3HC23DBCOD | 0.1              | see notes | 0.              | ???       |

| KPP name       | $\alpha^{\ominus}$ | Reference | $\alpha$ -T-dep | Reference |
|----------------|--------------------|-----------|-----------------|-----------|
| C513CO         | 0.1                | see notes | 0.              | ???       |
| CHOC3COOOH     | 0.1                | see notes | 0.              | ???       |
| CO23C4CO3H     | 0.1                | see notes | 0.              | ???       |
| C5H8           | 0.1                | see notes | 0.              | ???       |
| HCOC5          | 0.1                | see notes | 0.              | ???       |
| ZCODC23DBCOOH  | 0.1                | see notes | 0.              | ???       |
| MBOCOCO        | 0.1                | see notes | 0.              | ???       |
| C511OOH        | 0.1                | see notes | 0.              | ???       |
| C514OOH        | 0.1                | see notes | 0.              | ???       |
| C512OOH        | 0.1                | see notes | 0.              | ???       |
| C10DC2OOHC4OD  | 0.1                | see notes | 0.              | ???       |
| C513OOH        | 0.1                | see notes | 0.              | ???       |
| C10DC2O2C4OOH  | 0.1                | see notes | 0.              | ???       |
| C10DC3O2C4OOH  | 0.1                | see notes | 0.              | ???       |
| MBO            | 0.1                | see notes | 0.              | ???       |
| ISOPAOH        | 0.1                | see notes | 0.              | ???       |
| ISOPBOH        | 0.1                | see notes | 0.              | ???       |
| ISOPDOH        | 0.1                | see notes | 0.              | ???       |
| ISOPBOOH       | 0.1                | see notes | 0.              | ???       |
| ISOPDOOH       | 0.1                | see notes | 0.              | ???       |
| MBOACO         | 0.1                | see notes | 0.              | ???       |
| DB1OOH         | 0.1                | see notes | 0.              | ???       |
| C59OOH         | 0.1                | see notes | 0.              | ???       |
| C1OOHC2OOHC4OD | 0.1                | see notes | 0.              | ???       |
| DB2OOH         | 0.1                | see notes | 0.              | ???       |
| C4CO2DBCO3     | 0.1                | see notes | 0.              | ???       |
| MMALANHY       | 0.1                | see notes | 0.              | ???       |
| C54CO          | 0.1                | see notes | 0.              | ???       |
| C4CO2DCO3H     | 0.1                | see notes | 0.              | ???       |
| C5DIALCO       | 0.1                | see notes | 0.              | ???       |
| ACCOMECO3      | 0.1                | see notes | 0.              | ???       |
| MMALANHYO2     | 0.1                | see notes | 0.              | ???       |
| TLFUONE        | 0.1                | see notes | 0.              | ???       |
| C5DICARB       | 0.1                | see notes | 0.              | ???       |
| MC3ODBCO2H     | 0.1                | see notes | 0.              | ???       |
| C5CO14OH       | 0.1                | see notes | 0.              | ???       |
| C5134CO2OH     | 0.1                | see notes | 0.              | ???       |
| C5DIALOOH      | 0.1                | see notes | 0.              | ???       |
| ACCOMEECHO     | 0.1                | see notes | 0.              | ???       |
| C5CO14OOH      | 0.1                | see notes | 0.              | ???       |
| C24O3CCO2H     | 0.1                | see notes | 0.              | ???       |
| MMALNHYOOH     | 0.1                | see notes | 0.              | ???       |
| ACCOMECO3H     | 0.1                | see notes | 0.              | ???       |
| TLFUOOH        | 0.1                | see notes | 0.              | ???       |
| C5DICAROOH     | 0.1                | see notes | 0.              | ???       |
| CHOC3COPAN     | 0.1                | see notes | 0.              | ???       |
| ZCPANC23DBCOD  | 0.1                | see notes | 0.              | ???       |
| C5PAN9         | 0.1                | see notes | 0.              | ???       |
| NC4CHO         | 0.1                | see notes | 0.              | ???       |

| KPP name   | $\alpha^{\ominus}$ | Reference | $\alpha$ -T-dep | Reference |
|------------|--------------------|-----------|-----------------|-----------|
| C514NO3    | 0.1                | see notes | 0.              | ???       |
| NC4OHCPAN  | 0.1                | see notes | 0.              | ???       |
| ISOPBNO3   | 0.1                | see notes | 0.              | ???       |
| ISOPDNO3   | 0.1                | see notes | 0.              | ???       |
| NISOPOOH   | 0.1                | see notes | 0.              | ???       |
| NMBOBCO    | 0.1                | see notes | 0.              | ???       |
| C4MCONO3OH | 0.1                | see notes | 0.              | ???       |
| DB1NO3     | 0.1                | see notes | 0.              | ???       |
| NC4OHCO3H  | 0.1                | see notes | 0.              | ???       |
| C4CO2DBPAN | 0.1                | see notes | 0.              | ???       |
| NC4MDCO2H  | 0.1                | see notes | 0.              | ???       |
| C5COO2NO2  | 0.1                | see notes | 0.              | ???       |
| ACCOMEPAN  | 0.1                | see notes | 0.              | ???       |
| NTLFUOOH   | 0.1                | see notes | 0.              | ???       |
| LHC4ACCHO  | 0.1                | see notes | 0.              | ???       |
| LHC4ACCO2H | 0.1                | see notes | 0.              | ???       |
| LHC4ACCO3H | 0.1                | see notes | 0.              | ???       |
| LIEPOX     | 0.1                | see notes | 0.              | ???       |
| LISOPACOOH | 0.1                | see notes | 0.              | ???       |
| LC578OOH   | 0.1                | see notes | 0.              | ???       |
| LMBOABOOH  | 0.1                | see notes | 0.              | ???       |
| LC5PAN1719 | 0.1                | see notes | 0.              | ???       |
| LISOPACNO3 | 0.1                | see notes | 0.              | ???       |
| LNMBOABOOH | 0.1                | see notes | 0.              | ???       |
| LMBOABNO3  | 0.1                | see notes | 0.              | ???       |
| LNISOOH    | 0.1                | see notes | 0.              | ???       |
| C614CO     | 0.1                | see notes | 0.              | ???       |
| CO235C6OOH | 0.1                | see notes | 0.              | ???       |
| C614OOH    | 0.1                | see notes | 0.              | ???       |
| PBZQONE    | 0.1                | see notes | 0.              | ???       |
| CATECHOL   | 0.1                | see notes | 0.              | ???       |
| C6CO4DB    | 0.1                | see notes | 0.              | ???       |
| PBZQCO     | 0.1                | see notes | 0.              | ???       |
| C6H5O      | 0.1                | see notes | 0.              | ???       |
| CATEC1O    | 0.1                | see notes | 0.              | ???       |
| C5CO2DBC03 | 0.1                | see notes | 0.              | ???       |
| C5CO2DCO3H | 0.1                | see notes | 0.              | ???       |
| C5CO2OHCO3 | 0.1                | see notes | 0.              | ???       |
| BENZENE    | 0.1                | see notes | 0.              | ???       |
| PHENOL     | 0.1                | see notes | 0.              | ???       |
| C6H5OOH    | 0.1                | see notes | 0.              | ???       |
| BZEPOXMUC  | 0.1                | see notes | 0.              | ???       |
| C6125CO    | 0.1                | see notes | 0.              | ???       |
| CATEC1OOH  | 0.1                | see notes | 0.              | ???       |
| BZEMUCCO2H | 0.1                | see notes | 0.              | ???       |
| BZOBIPEROH | 0.1                | see notes | 0.              | ???       |
| BZEMUCCO   | 0.1                | see notes | 0.              | ???       |
| PBZQOOH    | 0.1                | see notes | 0.              | ???       |
| BZEMUCCO3H | 0.1                | see notes | 0.              | ???       |

| KPP name   | $\alpha^\ominus$ | Reference | $\alpha$ -T-dep | Reference |
|------------|------------------|-----------|-----------------|-----------|
| C5COOHCO3H | 0.1              | see notes | 0.              | ???       |
| C615CO2OOH | 0.1              | see notes | 0.              | ???       |
| BZBIPEROOH | 0.1              | see notes | 0.              | ???       |
| PHENOOH    | 0.1              | see notes | 0.              | ???       |
| BZEMUCOOH  | 0.1              | see notes | 0.              | ???       |
| C614NO3    | 0.1              | see notes | 0.              | ???       |
| NPHEN1O    | 0.1              | see notes | 0.              | ???       |
| DNPHEN     | 0.1              | see notes | 0.              | ???       |
| HOC6H4NO2  | 0.1              | see notes | 0.              | ???       |
| NCATECHOL  | 0.1              | see notes | 0.              | ???       |
| NPHEN1OOH  | 0.1              | see notes | 0.              | ???       |
| BZEMUCPAN  | 0.1              | see notes | 0.              | ???       |
| C5CO2DBPAN | 0.1              | see notes | 0.              | ???       |
| NBZQOOH    | 0.1              | see notes | 0.              | ???       |
| C5CO2OHPAN | 0.1              | see notes | 0.              | ???       |
| NDNPHENOOH | 0.1              | see notes | 0.              | ???       |
| DNPHENOOH  | 0.1              | see notes | 0.              | ???       |
| NNCATECOOH | 0.1              | see notes | 0.              | ???       |
| BZBIPERNO3 | 0.1              | see notes | 0.              | ???       |
| BZEMUCNO3  | 0.1              | see notes | 0.              | ???       |
| NPHENOOH   | 0.1              | see notes | 0.              | ???       |
| NCATECOOH  | 0.1              | see notes | 0.              | ???       |
| CO235C6CHO | 0.1              | see notes | 0.              | ???       |
| C235C6CO3H | 0.1              | see notes | 0.              | ???       |
| C716OOH    | 0.1              | see notes | 0.              | ???       |
| C721OOH    | 0.1              | see notes | 0.              | ???       |
| C722OOH    | 0.1              | see notes | 0.              | ???       |
| BENZAL     | 0.1              | see notes | 0.              | ???       |
| PHCOOH     | 0.1              | see notes | 0.              | ???       |
| PTLQONE    | 0.1              | see notes | 0.              | ???       |
| C6H5CO3H   | 0.1              | see notes | 0.              | ???       |
| C7CO4DB    | 0.1              | see notes | 0.              | ???       |
| PTLQCO     | 0.1              | see notes | 0.              | ???       |
| TOL1O      | 0.1              | see notes | 0.              | ???       |
| MCATEC1O   | 0.1              | see notes | 0.              | ???       |
| TOLUENE    | 0.1              | see notes | 0.              | ???       |
| CRESOL     | 0.1              | see notes | 0.              | ???       |
| OXYL1OOH   | 0.1              | see notes | 0.              | ???       |
| C6H5CH2OOH | 0.1              | see notes | 0.              | ???       |
| MCATECHOL  | 0.1              | see notes | 0.              | ???       |
| TLEPOXMUC  | 0.1              | see notes | 0.              | ???       |
| MCATEC1OOH | 0.1              | see notes | 0.              | ???       |
| TLEMUCCO2H | 0.1              | see notes | 0.              | ???       |
| TLOBIPEROH | 0.1              | see notes | 0.              | ???       |
| PTLQOOH    | 0.1              | see notes | 0.              | ???       |
| TLEMUCCO   | 0.1              | see notes | 0.              | ???       |
| TLEMUCCO3H | 0.1              | see notes | 0.              | ???       |
| C6COOHCO3H | 0.1              | see notes | 0.              | ???       |
| TLBIPEROOH | 0.1              | see notes | 0.              | ???       |

| KPP name   | $\alpha^\ominus$ | Reference | $\alpha$ -T-dep | Reference |
|------------|------------------|-----------|-----------------|-----------|
| CRESOOH    | 0.1              | see notes | 0.              | ???       |
| TLEMUCOOH  | 0.1              | see notes | 0.              | ???       |
| C7PAN3     | 0.1              | see notes | 0.              | ???       |
| PBZN       | 0.1              | see notes | 0.              | ???       |
| NCRES1O    | 0.1              | see notes | 0.              | ???       |
| DNCRES     | 0.1              | see notes | 0.              | ???       |
| TOL1OHNO2  | 0.1              | see notes | 0.              | ???       |
| C6H5CH2NO3 | 0.1              | see notes | 0.              | ???       |
| MNCATECH   | 0.1              | see notes | 0.              | ???       |
| NCRES1OOH  | 0.1              | see notes | 0.              | ???       |
| NPTLQOOH   | 0.1              | see notes | 0.              | ???       |
| TLEMUCPAN  | 0.1              | see notes | 0.              | ???       |
| C6CO2OHPAN | 0.1              | see notes | 0.              | ???       |
| NDNCRESOOH | 0.1              | see notes | 0.              | ???       |
| DNCRESOOH  | 0.1              | see notes | 0.              | ???       |
| MNNCATCOOH | 0.1              | see notes | 0.              | ???       |
| TLBIPERNO3 | 0.1              | see notes | 0.              | ???       |
| TLEMUCNO3  | 0.1              | see notes | 0.              | ???       |
| NCRESOOH   | 0.1              | see notes | 0.              | ???       |
| MNCATECOOH | 0.1              | see notes | 0.              | ???       |
| C8BCCO     | 0.1              | see notes | 0.              | ???       |
| C8BCOOH    | 0.1              | see notes | 0.              | ???       |
| C721CHO    | 0.1              | see notes | 0.              | ???       |
| NORPINIC   | 0.1              | see notes | 0.              | ???       |
| C721CO3H   | 0.1              | see notes | 0.              | ???       |
| C8BC       | 0.1              | see notes | 0.              | ???       |
| C85OOH     | 0.1              | see notes | 0.              | ???       |
| C86OOH     | 0.1              | see notes | 0.              | ???       |
| C812OOH    | 0.1              | see notes | 0.              | ???       |
| C813OOH    | 0.1              | see notes | 0.              | ???       |
| C89OOH     | 0.1              | see notes | 0.              | ???       |
| C810OOH    | 0.1              | see notes | 0.              | ???       |
| STYRENE    | 0.1              | see notes | 0.              | ???       |
| LXYL       | 0.1              | see notes | 0.              | ???       |
| EBENZ      | 0.1              | see notes | 0.              | ???       |
| STYRENOOH  | 0.1              | see notes | 0.              | ???       |
| C8BCNO3    | 0.1              | see notes | 0.              | ???       |
| C721PAN    | 0.1              | see notes | 0.              | ???       |
| C89NO3     | 0.1              | see notes | 0.              | ???       |
| C810NO3    | 0.1              | see notes | 0.              | ???       |
| NSTYRENOOH | 0.1              | see notes | 0.              | ???       |
| NOPINDCO   | 0.1              | see notes | 0.              | ???       |
| C85CO3H    | 0.1              | see notes | 0.              | ???       |
| NOPINONE   | 0.1              | see notes | 0.              | ???       |
| NOPINOO    | 0.1              | see notes | 0.              | ???       |
| NORPINAL   | 0.1              | see notes | 0.              | ???       |
| NORPINENOL | 0.1              | see notes | 0.              | ???       |
| C89CO2H    | 0.1              | see notes | 0.              | ???       |
| NOPINDOOH  | 0.1              | see notes | 0.              | ???       |

| KPP name       | $\alpha^{\ominus}$ | Reference                | $\alpha$ -T-dep | Reference |
|----------------|--------------------|--------------------------|-----------------|-----------|
| RO6R3P         | 0.1                | see notes                | 0.              | ???       |
| C89CO3H        | 0.1                | see notes                | 0.              | ???       |
| PINIC          | 0.1                | see notes                | 0.              | ???       |
| C811CO3H       | 0.1                | see notes                | 0.              | ???       |
| C96OOH         | 0.1                | see notes                | 0.              | ???       |
| C97OOH         | 0.1                | see notes                | 0.              | ???       |
| C98OOH         | 0.1                | see notes                | 0.              | ???       |
| C89PAN         | 0.1                | see notes                | 0.              | ???       |
| C9PAN2         | 0.1                | see notes                | 0.              | ???       |
| C811PAN        | 0.1                | see notes                | 0.              | ???       |
| C96NO3         | 0.1                | see notes                | 0.              | ???       |
| LTMB           | 0.1                | see notes                | 0.              | ???       |
| C109CO         | 0.1                | see notes                | 0.              | ???       |
| PINALOOH       | 0.1                | see notes                | 0.              | ???       |
| APINENE        | 0.1                | see notes                | 0.              | ???       |
| BPINENE        | 0.1                | see notes                | 0.              | ???       |
| CARENE         | 0.1                | see notes                | 0.              | ???       |
| SABINENE       | 0.1                | see notes                | 0.              | ???       |
| CAMPHENE       | 0.1                | see notes                | 0.              | ???       |
| PINAL          | 0.1                | see notes                | 0.              | ???       |
| PINENOL        | 0.1                | see notes                | 0.              | ???       |
| MENTHEN6ONE    | 0.1                | see notes                | 0.              | ???       |
| PINONIC        | 0.1                | see notes                | 0.              | ???       |
| C109OOH        | 0.1                | see notes                | 0.              | ???       |
| PERPINONIC     | 0.1                | see notes                | 0.              | ???       |
| C106OOH        | 0.1                | see notes                | 0.              | ???       |
| OH2MENTHEN6ONE | 0.1                | see notes                | 0.              | ???       |
| BPINAOOH       | 0.1                | see notes                | 0.              | ???       |
| RO6R3OOH       | 0.1                | see notes                | 0.              | ???       |
| PINALNO3       | 0.1                | see notes                | 0.              | ???       |
| C10PAN2        | 0.1                | see notes                | 0.              | ???       |
| C106NO3        | 0.1                | see notes                | 0.              | ???       |
| BPINANO3       | 0.1                | see notes                | 0.              | ???       |
| RO6R1NO3       | 0.1                | see notes                | 0.              | ???       |
| RO6R3NO3       | 0.1                | see notes                | 0.              | ???       |
| ROO6R1NO3      | 0.1                | see notes                | 0.              | ???       |
| LAPINABOOH     | 0.1                | see notes                | 0.              | ???       |
| LAPINABNO3     | 0.1                | see notes                | 0.              | ???       |
| LNAPINABOOH    | 0.1                | see notes                | 0.              | ???       |
| LNBPINABOOH    | 0.1                | see notes                | 0.              | ???       |
| LHAROM         | 0.1                | see notes                | 0.              | ???       |
| CHF3           | 0.1                | see notes                | 0.              | ???       |
| CHF2CF3        | 0.1                | see notes                | 0.              | ???       |
| CH3CF3         | 0.1                | see notes                | 0.              | ???       |
| CH2F2          | 0.1                | see notes                | 0.              | ???       |
| CH3CHF2        | 0.1                | see notes                | 0.              | ???       |
| Cl2            | 0.038              | Hu et al. (1995)         | 6546.           | ???       |
| HCl            | 0.074              | Schweitzer et al. (2000) | 3072.           | ???       |
| HOCl           | 0.5                | see notes                | 0.              | ???       |



| KPP name   | $\alpha^{\ominus}$ | Reference                    | $\alpha$ -T-dep | Reference |
|------------|--------------------|------------------------------|-----------------|-----------|
| ClNO3      | 0.108              | Deiber et al. (2004)         | 0.              | ???       |
| CH3Cl      | 0.1                | see notes                    | 0.              | ???       |
| CHF2Cl     | 0.1                | see notes                    | 0.              | ???       |
| CH2FCF3    | 0.1                | see notes                    | 0.              | ???       |
| CF2ClCFCl2 | 0.1                | see notes                    | 0.              | ???       |
| CH2Cl2     | 0.1                | see notes                    | 0.              | ???       |
| CH3CFCl2   | 0.1                | see notes                    | 0.              | ???       |
| CF2ClCF2Cl | 0.1                | see notes                    | 0.              | ???       |
| CHCl3      | 0.1                | see notes                    | 0.              | ???       |
| CF3CF2Cl   | 0.1                | see notes                    | 0.              | ???       |
| Br2        | 0.038              | Hu et al. (1995)             | 6546.           | ???       |
| HBr        | 0.032              | Schweitzer et al. (2000)     | 3940.           | ???       |
| HOBr       | 0.5                | Abbatt and Waschewsky (1998) | 0.              | ???       |
| BrNO3      | 0.063              | Deiber et al. (2004)         | 0.              | ???       |
| BrCl       | 0.038              | see notes                    | 6546.           | ???       |
| CH3Br      | 0.1                | see notes                    | 0.              | ???       |
| CHCl2Br    | 0.1                | see notes                    | 0.              | ???       |
| CHClBr2    | 0.1                | see notes                    | 0.              | ???       |
| CH2ClBr    | 0.1                | see notes                    | 0.              | ???       |
| CH2Br2     | 0.1                | see notes                    | 0.              | ???       |
| CHBr3      | 0.1                | see notes                    | 0.              | ???       |
| I2         | 0.01               | see notes                    | 2000.           | ???       |
| IO         | 0.5                | see notes                    | 2000.           | ???       |
| OIO        | 0.01               | see notes                    | 0.              | ???       |
| I2O2       | 0.1                | see notes                    | 2000.           | ???       |
| HI         | 0.036              | Schweitzer et al. (2000)     | 4130.           | ???       |
| HOI        | 0.5                | see notes                    | 0.              | ???       |
| HIO3       | 0.01               | see notes                    | 0.              | ???       |
| INO2       | 0.1                | see notes                    | 2000.           | ???       |
| INO3       | 0.1                | see notes                    | 2000.           | ???       |
| ICl        | 0.018              | Braban et al. (2007)         | 2000.           | ???       |
| CH2ClI     | 0.1                | see notes                    | 0.              | ???       |
| IBr        | 0.018              | see notes                    | 2000.           | ???       |
| SO2        | 0.11               | DeMore et al. (1997)         | 0.              | ???       |
| H2SO4      | 0.65               | Pöschl et al. (1998)         | 0.              | ???       |
| CH3SO3H    | 0.076              | De Bruyn et al. (1994)       | 1762.           | ???       |
| DMS        | 0.1                | see notes                    | 0.              | ???       |
| DMSO       | 0.048              | De Bruyn et al. (1994)       | 2578.           | ???       |
| CH3SO2     | 0.1                | see notes                    | 0.              | ???       |
| CH3SO3     | 0.1                | see notes                    | 0.              | ???       |
| Hg         | 0.1                | see notes                    | 0.              | ???       |
| HgO        | 0.1                | see notes                    | 0.              | ???       |
| HgCl       | 0.1                | see notes                    | 0.              | ???       |
| HgCl2      | 0.1                | see notes                    | 0.              | ???       |
| HgBr       | 0.1                | see notes                    | 0.              | ???       |
| HgBr2      | 0.1                | see notes                    | 0.              | ???       |
| ClHgBr     | 0.1                | see notes                    | 0.              | ???       |
| BrHgOBr    | 0.1                | see notes                    | 0.              | ???       |
| ClHgOBr    | 0.1                | see notes                    | 0.              | ???       |

| KPP name   | $\alpha^\ominus$ | Reference | $\alpha$ -T-dep | Reference |
|------------|------------------|-----------|-----------------|-----------|
| ClHgOBr    | 0.1              | see notes | 0.              | ???       |
| ISON       | 0.1              | see notes | 0.              | ???       |
| ISOOH      | 0.1              | see notes | 0.              | ???       |
| LTERP      | 0.1              | see notes | 0.              | ???       |
| LALK4      | 0.1              | see notes | 0.              | ???       |
| LALK5      | 0.1              | see notes | 0.              | ???       |
| LARO1      | 0.1              | see notes | 0.              | ???       |
| LARO2      | 0.1              | see notes | 0.              | ???       |
| LOLE1      | 0.1              | see notes | 0.              | ???       |
| LOLE2      | 0.1              | see notes | 0.              | ???       |
| LfPOG02    | 0.1              | see notes | 0.              | ???       |
| LfPOG03    | 0.1              | see notes | 0.              | ???       |
| LfPOG04    | 0.1              | see notes | 0.              | ???       |
| LfPOG05    | 0.1              | see notes | 0.              | ???       |
| LbbPOG02   | 0.1              | see notes | 0.              | ???       |
| LbbPOG03   | 0.1              | see notes | 0.              | ???       |
| LbbPOG04   | 0.1              | see notes | 0.              | ???       |
| LfSOGsv01  | 0.1              | see notes | 0.              | ???       |
| LfSOGsv02  | 0.1              | see notes | 0.              | ???       |
| LbbSOGsv01 | 0.1              | see notes | 0.              | ???       |
| LbbSOGsv02 | 0.1              | see notes | 0.              | ???       |
| LfSOGiv01  | 0.1              | see notes | 0.              | ???       |
| LfSOGiv02  | 0.1              | see notes | 0.              | ???       |
| LfSOGiv03  | 0.1              | see notes | 0.              | ???       |
| LfSOGiv04  | 0.1              | see notes | 0.              | ???       |
| LbbSOGiv01 | 0.1              | see notes | 0.              | ???       |
| LbbSOGiv02 | 0.1              | see notes | 0.              | ???       |
| LbbSOGiv03 | 0.1              | see notes | 0.              | ???       |
| LbSOGv01   | 0.1              | see notes | 0.              | ???       |
| LbSOGv02   | 0.1              | see notes | 0.              | ???       |
| LbSOGv03   | 0.1              | see notes | 0.              | ???       |
| LbSOGv04   | 0.1              | see notes | 0.              | ???       |
| LbOSOGv01  | 0.1              | see notes | 0.              | ???       |
| LbOSOGv02  | 0.1              | see notes | 0.              | ???       |
| LbOSOGv03  | 0.1              | see notes | 0.              | ???       |
| LaSOGv01   | 0.1              | see notes | 0.              | ???       |
| LaSOGv02   | 0.1              | see notes | 0.              | ???       |
| LaSOGv03   | 0.1              | see notes | 0.              | ???       |
| LaSOGv04   | 0.1              | see notes | 0.              | ???       |
| LaOSOGv01  | 0.1              | see notes | 0.              | ???       |
| LaOSOGv02  | 0.1              | see notes | 0.              | ???       |
| LaOSOGv03  | 0.1              | see notes | 0.              | ???       |

| KPP name   | $K_a$    | Reference                  | $K_{a2}$ | Reference |
|------------|----------|----------------------------|----------|-----------|
| O2         | 9.99999  | ???                        | 9.99999  | ???       |
| O3         | 9.99999  | ???                        | 9.99999  | ???       |
| H          | 9.99999  | ???                        | 9.99999  | ???       |
| H2         | 9.99999  | ???                        | 9.99999  | ???       |
| OH         | 9.99999  | ???                        | 9.99999  | ???       |
| HO2        | 3.5E-5   | Pandis and Seinfeld (1989) | 9.99999  | ???       |
| H2O        | 9.99999  | ???                        | 9.99999  | ???       |
| H2O2       | 9.99999  | ???                        | 9.99999  | ???       |
| NH3        | -1.75E-5 | Pandis and Seinfeld (1989) | 9.99999  | ???       |
| NO         | 9.99999  | ???                        | 9.99999  | ???       |
| NO2        | 9.99999  | ???                        | 9.99999  | ???       |
| NO3        | 9.99999  | ???                        | 9.99999  | ???       |
| N2O5       | 9.99999  | ???                        | 9.99999  | ???       |
| HONO       | 5.1E-4   | Pandis and Seinfeld (1989) | 9.99999  | ???       |
| HNO3       | 15.4     | Pandis and Seinfeld (1989) | 9.99999  | ???       |
| HNO4       | 9.99999  | ???                        | 9.99999  | ???       |
| NH2        | 9.99999  | ???                        | 9.99999  | ???       |
| HNO        | 9.99999  | ???                        | 9.99999  | ???       |
| NHOH       | 9.99999  | ???                        | 9.99999  | ???       |
| NH2O       | 9.99999  | ???                        | 9.99999  | ???       |
| NH2OH      | 9.99999  | ???                        | 9.99999  | ???       |
| CH4        | 9.99999  | ???                        | 9.99999  | ???       |
| CH3        | 9.99999  | ???                        | 9.99999  | ???       |
| CH3O       | 9.99999  | ???                        | 9.99999  | ???       |
| CO         | 9.99999  | ???                        | 9.99999  | ???       |
| CO2        | 9.99999  | ???                        | 9.99999  | ???       |
| HCHO       | 9.99999  | ???                        | 9.99999  | ???       |
| HCOOH      | 1.78E-4  | Pandis and Seinfeld (1989) | 9.99999  | ???       |
| CH3O2      | 9.99999  | ???                        | 9.99999  | ???       |
| HOCH2O2    | 9.99999  | ???                        | 9.99999  | ???       |
| CH3OH      | 9.99999  | ???                        | 9.99999  | ???       |
| CH3OOH     | 9.99999  | ???                        | 9.99999  | ???       |
| HOCH2OOH   | 9.99999  | ???                        | 9.99999  | ???       |
| HOCH2OH    | 9.99999  | ???                        | 9.99999  | ???       |
| CH3ONO     | 9.99999  | ???                        | 9.99999  | ???       |
| CH3NO3     | 9.99999  | ???                        | 9.99999  | ???       |
| CH3O2NO2   | 9.99999  | ???                        | 9.99999  | ???       |
| HOCH2O2NO2 | 9.99999  | ???                        | 9.99999  | ???       |
| HCN        | 9.99999  | ???                        | 9.99999  | ???       |
| CH2CO      | 9.99999  | ???                        | 9.99999  | ???       |
| GLYOX      | 9.99999  | ???                        | 9.99999  | ???       |
| HCOCO2H    | 6.61E-4  | Lide (2008)                | 9.99999  | ???       |
| HCOCO3H    | 9.99999  | ???                        | 9.99999  | ???       |
| CH2CHOH    | 9.99999  | ???                        | 9.99999  | ???       |
| CH3CHO     | 9.99999  | ???                        | 9.99999  | ???       |
| CH3CO2H    | 1.75E-5  | Lide (2008)                | 9.99999  | ???       |
| HOCH2CHO   | 9.99999  | ???                        | 9.99999  | ???       |
| HOCH2CHO   | 9.99999  | ???                        | 9.99999  | ???       |
| CH3CO3H    | 9.99999  | ???                        | 9.99999  | ???       |

| KPP name                                                     | $K_a$   | Reference   | $K_{a2}$ | Reference |
|--------------------------------------------------------------|---------|-------------|----------|-----------|
| HOCH <sub>2</sub> CO <sub>2</sub> H                          | 1.48E-4 | Lide (2008) | 9.99999  | ???       |
| HOCH <sub>2</sub> CO <sub>3</sub> H                          | 9.99999 | ???         | 9.99999  | ???       |
| HOCH <sub>2</sub> CO <sub>2</sub> H                          | 9.99999 | ???         | 9.99999  | ???       |
| HOCH <sub>2</sub> CO <sub>3</sub> H                          | 9.99999 | ???         | 9.99999  | ???       |
| C <sub>2</sub> H <sub>5</sub> O <sub>2</sub>                 | 9.99999 | ???         | 9.99999  | ???       |
| C <sub>2</sub> H <sub>5</sub> OH                             | 9.99999 | ???         | 9.99999  | ???       |
| C <sub>2</sub> H <sub>5</sub> OOH                            | 9.99999 | ???         | 9.99999  | ???       |
| ETHGLY                                                       | 9.99999 | ???         | 9.99999  | ???       |
| HYETHO <sub>2</sub> H                                        | 9.99999 | ???         | 9.99999  | ???       |
| CH <sub>3</sub> CHOHOOH                                      | 9.99999 | ???         | 9.99999  | ???       |
| NO <sub>3</sub> CH <sub>2</sub> PAN                          | 9.99999 | ???         | 9.99999  | ???       |
| CH <sub>3</sub> CN                                           | 9.99999 | ???         | 9.99999  | ???       |
| NO <sub>3</sub> CH <sub>2</sub> CHO                          | 9.99999 | ???         | 9.99999  | ???       |
| PAN                                                          | 9.99999 | ???         | 9.99999  | ???       |
| PHAN                                                         | 9.99999 | ???         | 9.99999  | ???       |
| ETHOHNO <sub>3</sub>                                         | 9.99999 | ???         | 9.99999  | ???       |
| C <sub>2</sub> H <sub>5</sub> NO <sub>3</sub>                | 9.99999 | ???         | 9.99999  | ???       |
| C <sub>2</sub> H <sub>5</sub> O <sub>2</sub> NO <sub>2</sub> | 9.99999 | ???         | 9.99999  | ???       |
| OXL                                                          | 9.99999 | ???         | 9.99999  | ???       |
| C <sub>3</sub> CO                                            | 9.99999 | ???         | 9.99999  | ???       |
| ALCOCH <sub>2</sub> OOH                                      | 9.99999 | ???         | 9.99999  | ???       |
| MGLYOX                                                       | 9.99999 | ???         | 9.99999  | ???       |
| HOCH <sub>2</sub> COCHO                                      | 9.99999 | ???         | 9.99999  | ???       |
| HCOCH <sub>2</sub> CHO                                       | 9.99999 | ???         | 9.99999  | ???       |
| HCOCH <sub>2</sub> CO <sub>2</sub> H                         | 9.99999 | ???         | 9.99999  | ???       |
| HCOCH <sub>2</sub> CO <sub>3</sub> H                         | 9.99999 | ???         | 9.99999  | ???       |
| CH <sub>3</sub> COCH <sub>3</sub>                            | 9.99999 | ???         | 9.99999  | ???       |
| ACETOL                                                       | 9.99999 | ???         | 9.99999  | ???       |
| HYPERACET                                                    | 9.99999 | ???         | 9.99999  | ???       |
| HOC <sub>2</sub> H <sub>4</sub> CO <sub>2</sub> H            | 9.99999 | ???         | 9.99999  | ???       |
| HOC <sub>2</sub> H <sub>4</sub> CO <sub>3</sub> H            | 9.99999 | ???         | 9.99999  | ???       |
| IC <sub>3</sub> H <sub>7</sub> OOH                           | 9.99999 | ???         | 9.99999  | ???       |
| HYPROPO <sub>2</sub> H                                       | 9.99999 | ???         | 9.99999  | ???       |
| CH <sub>3</sub> CHCO                                         | 9.99999 | ???         | 9.99999  | ???       |
| CH <sub>3</sub> COCO <sub>2</sub> H                          | 4.07E-3 | Lide (2008) | 9.99999  | ???       |
| CH <sub>3</sub> COCO <sub>3</sub> H                          | 9.99999 | ???         | 9.99999  | ???       |
| HCOCOCH <sub>2</sub> OOH                                     | 9.99999 | ???         | 9.99999  | ???       |
| C <sub>2</sub> H <sub>5</sub> CHO                            | 9.99999 | ???         | 9.99999  | ???       |
| PROPENOL                                                     | 9.99999 | ???         | 9.99999  | ???       |
| C <sub>2</sub> H <sub>5</sub> CO <sub>2</sub> H              | 1.35E-5 | Lide (2008) | 9.99999  | ???       |
| C <sub>2</sub> H <sub>5</sub> CO <sub>3</sub> H              | 9.99999 | ???         | 9.99999  | ???       |
| HOCH <sub>2</sub> COCH <sub>2</sub> OOH                      | 9.99999 | ???         | 9.99999  | ???       |
| IPROPOL                                                      | 9.99999 | ???         | 9.99999  | ???       |
| NROPOL                                                       | 9.99999 | ???         | 9.99999  | ???       |
| NC <sub>3</sub> H <sub>7</sub> OOH                           | 9.99999 | ???         | 9.99999  | ???       |
| C <sub>3</sub> DIALOOH                                       | 9.99999 | ???         | 9.99999  | ???       |
| METACETHO                                                    | 9.99999 | ???         | 9.99999  | ???       |
| C <sub>3</sub> OH <sub>13</sub> CO                           | 9.99999 | ???         | 9.99999  | ???       |
| HCOCOCHCO <sub>3</sub> H                                     | 9.99999 | ???         | 9.99999  | ???       |

| KPP name      | $K_a$   | Reference          | $K_{a2}$ | Reference |
|---------------|---------|--------------------|----------|-----------|
| C3PAN2        | 9.99999 | ???                | 9.99999  | ???       |
| NOA           | 9.99999 | ???                | 9.99999  | ???       |
| CH3COCH2O2NO2 | 9.99999 | ???                | 9.99999  | ???       |
| PPN           | 9.99999 | ???                | 9.99999  | ???       |
| C3PAN1        | 9.99999 | ???                | 9.99999  | ???       |
| NC3H7NO3      | 9.99999 | ???                | 9.99999  | ???       |
| IC3H7NO3      | 9.99999 | ???                | 9.99999  | ???       |
| PROPOLNO3     | 9.99999 | ???                | 9.99999  | ???       |
| PR2O2HNO3     | 9.99999 | ???                | 9.99999  | ???       |
| HCOCOHPAN     | 9.99999 | ???                | 9.99999  | ???       |
| HCOCCH3CO     | 9.99999 | ???                | 9.99999  | ???       |
| CH3COCHCO     | 9.99999 | ???                | 9.99999  | ???       |
| C4CODIAL      | 9.99999 | ???                | 9.99999  | ???       |
| CO23C3CHO     | 9.99999 | ???                | 9.99999  | ???       |
| C312COCO3H    | 9.99999 | ???                | 9.99999  | ???       |
| CO2H3CHO      | 9.99999 | ???                | 9.99999  | ???       |
| BIACETO2      | 9.99999 | ???                | 9.99999  | ???       |
| CHOC3COO2     | 9.99999 | ???                | 9.99999  | ???       |
| MACR          | 9.99999 | ???                | 9.99999  | ???       |
| MVK           | 9.99999 | ???                | 9.99999  | ???       |
| BIACET        | 9.99999 | ???                | 9.99999  | ???       |
| MACO2H        | 2.24E-5 | Dong et al. (2008) | 9.99999  | ???       |
| HVMK          | 9.99999 | ???                | 9.99999  | ???       |
| HMAC          | 9.99999 | ???                | 9.99999  | ???       |
| CO2C3CHO      | 9.99999 | ???                | 9.99999  | ???       |
| IBUTDIAL      | 9.99999 | ???                | 9.99999  | ???       |
| MACO3H        | 9.99999 | ???                | 9.99999  | ???       |
| BIACETOH      | 9.99999 | ???                | 9.99999  | ???       |
| CH3COOHCHCHO  | 9.99999 | ???                | 9.99999  | ???       |
| HCOCCH3CHOOH  | 9.99999 | ???                | 9.99999  | ???       |
| C413COOOH     | 9.99999 | ???                | 9.99999  | ???       |
| BIACETOOH     | 9.99999 | ???                | 9.99999  | ???       |
| CH3COCOCO2H   | 9.99999 | ???                | 9.99999  | ???       |
| CO2H3CO2H     | 9.99999 | ???                | 9.99999  | ???       |
| C44OOH        | 9.99999 | ???                | 9.99999  | ???       |
| CO2H3CO3H     | 9.99999 | ???                | 9.99999  | ???       |
| MACRN         | 9.99999 | ???                | 9.99999  | ???       |
| MVKNO3        | 9.99999 | ???                | 9.99999  | ???       |
| PIPN          | 9.99999 | ???                | 9.99999  | ???       |
| MEK           | 9.99999 | ???                | 9.99999  | ???       |
| HO12CO3C4     | 9.99999 | ???                | 9.99999  | ???       |
| MACROH        | 9.99999 | ???                | 9.99999  | ???       |
| MACROOH       | 9.99999 | ???                | 9.99999  | ???       |
| BUTENOL       | 9.99999 | ???                | 9.99999  | ???       |
| C3H7CHO       | 9.99999 | ???                | 9.99999  | ???       |
| IPRCHO        | 9.99999 | ???                | 9.99999  | ???       |
| MPROPENOL     | 9.99999 | ???                | 9.99999  | ???       |
| IBUTALOH      | 9.99999 | ???                | 9.99999  | ???       |
| BUT2OLO       | 9.99999 | ???                | 9.99999  | ???       |

| KPP name      | $K_a$   | Reference | $K_{a2}$ | Reference |
|---------------|---------|-----------|----------|-----------|
| PERIBUACID    | 9.99999 | ???       | 9.99999  | ???       |
| IPRHOCO2H     | 9.99999 | ???       | 9.99999  | ???       |
| IPRHOCO3H     | 9.99999 | ???       | 9.99999  | ???       |
| IC4H9NO3      | 9.99999 | ???       | 9.99999  | ???       |
| TC4H9NO3      | 9.99999 | ???       | 9.99999  | ???       |
| BUT2OLNO3     | 9.99999 | ???       | 9.99999  | ???       |
| TC4H9OOH      | 9.99999 | ???       | 9.99999  | ???       |
| IC4H9OOH      | 9.99999 | ???       | 9.99999  | ???       |
| IBUTOLBOOH    | 9.99999 | ???       | 9.99999  | ???       |
| BUT2OLOOH     | 9.99999 | ???       | 9.99999  | ???       |
| MALANHY       | 9.99999 | ???       | 9.99999  | ???       |
| CO2C4DIAL     | 9.99999 | ???       | 9.99999  | ???       |
| MALNHYOHO     | 9.99999 | ???       | 9.99999  | ???       |
| BZFUONE       | 9.99999 | ???       | 9.99999  | ???       |
| MALDIAL       | 9.99999 | ???       | 9.99999  | ???       |
| MALDALCO2H    | 9.99999 | ???       | 9.99999  | ???       |
| EPXC4DIAL     | 9.99999 | ???       | 9.99999  | ???       |
| HOCOC4DIAL    | 9.99999 | ???       | 9.99999  | ???       |
| MALDALCO3H    | 9.99999 | ???       | 9.99999  | ???       |
| BZFUCO        | 9.99999 | ???       | 9.99999  | ???       |
| EPXDLCO2H     | 9.99999 | ???       | 9.99999  | ???       |
| CO14O3CHO     | 9.99999 | ???       | 9.99999  | ???       |
| CO14O3CO2H    | 9.99999 | ???       | 9.99999  | ???       |
| EPXDLCO3H     | 9.99999 | ???       | 9.99999  | ???       |
| MALANHYOOH    | 9.99999 | ???       | 9.99999  | ???       |
| MALDIALOOH    | 9.99999 | ???       | 9.99999  | ???       |
| BZFUOOH       | 9.99999 | ???       | 9.99999  | ???       |
| MECOACEOOH    | 9.99999 | ???       | 9.99999  | ???       |
| C312COPAN     | 9.99999 | ???       | 9.99999  | ???       |
| MPAN          | 9.99999 | ???       | 9.99999  | ???       |
| IBUTOLBNO3    | 9.99999 | ???       | 9.99999  | ???       |
| C4PAN5        | 9.99999 | ???       | 9.99999  | ???       |
| NC4DCO2H      | 9.99999 | ???       | 9.99999  | ???       |
| MALDIALPAN    | 9.99999 | ???       | 9.99999  | ???       |
| NBZFUONE      | 9.99999 | ???       | 9.99999  | ???       |
| EPXDLPAN      | 9.99999 | ???       | 9.99999  | ???       |
| NBZFUOOH      | 9.99999 | ???       | 9.99999  | ???       |
| LMEKOOH       | 9.99999 | ???       | 9.99999  | ???       |
| LHMKABOOH     | 9.99999 | ???       | 9.99999  | ???       |
| LC4H9OOH      | 9.99999 | ???       | 9.99999  | ???       |
| LBUT1ENOOH    | 9.99999 | ???       | 9.99999  | ???       |
| LMEKNO3       | 9.99999 | ???       | 9.99999  | ???       |
| LC4H9NO3      | 9.99999 | ???       | 9.99999  | ???       |
| LBUT1ENNO3    | 9.99999 | ???       | 9.99999  | ???       |
| ME3FURAN      | 9.99999 | ???       | 9.99999  | ???       |
| ZCODC23DBCOD  | 9.99999 | ???       | 9.99999  | ???       |
| CO13C4CHO     | 9.99999 | ???       | 9.99999  | ???       |
| CO23C4CHO     | 9.99999 | ???       | 9.99999  | ???       |
| ZCO3HC23DBCOD | 9.99999 | ???       | 9.99999  | ???       |

| KPP name       | $K_a$   | Reference | $K_{a2}$ | Reference |
|----------------|---------|-----------|----------|-----------|
| C513CO         | 9.99999 | ???       | 9.99999  | ???       |
| CHOC3COOOH     | 9.99999 | ???       | 9.99999  | ???       |
| CO23C4CO3H     | 9.99999 | ???       | 9.99999  | ???       |
| C5H8           | 9.99999 | ???       | 9.99999  | ???       |
| HCOC5          | 9.99999 | ???       | 9.99999  | ???       |
| ZCODC23DBC00H  | 9.99999 | ???       | 9.99999  | ???       |
| MBOCOCO        | 9.99999 | ???       | 9.99999  | ???       |
| C511OOH        | 9.99999 | ???       | 9.99999  | ???       |
| C514OOH        | 9.99999 | ???       | 9.99999  | ???       |
| C512OOH        | 9.99999 | ???       | 9.99999  | ???       |
| C10DC2OOHC4OD  | 9.99999 | ???       | 9.99999  | ???       |
| C513OOH        | 9.99999 | ???       | 9.99999  | ???       |
| C10DC2O2C4OOH  | 9.99999 | ???       | 9.99999  | ???       |
| C10DC3O2C4OOH  | 9.99999 | ???       | 9.99999  | ???       |
| MBO            | 9.99999 | ???       | 9.99999  | ???       |
| ISOPAOH        | 9.99999 | ???       | 9.99999  | ???       |
| ISOPBOH        | 9.99999 | ???       | 9.99999  | ???       |
| ISOPDOH        | 9.99999 | ???       | 9.99999  | ???       |
| ISOPBOOH       | 9.99999 | ???       | 9.99999  | ???       |
| ISOPDOOH       | 9.99999 | ???       | 9.99999  | ???       |
| MBOACO         | 9.99999 | ???       | 9.99999  | ???       |
| DB1OOH         | 9.99999 | ???       | 9.99999  | ???       |
| C59OOH         | 9.99999 | ???       | 9.99999  | ???       |
| C1OOHC2OOHC4OD | 9.99999 | ???       | 9.99999  | ???       |
| DB2OOH         | 9.99999 | ???       | 9.99999  | ???       |
| C4CO2DBC03     | 9.99999 | ???       | 9.99999  | ???       |
| MMALANHY       | 9.99999 | ???       | 9.99999  | ???       |
| C54CO          | 9.99999 | ???       | 9.99999  | ???       |
| C4CO2DCO3H     | 9.99999 | ???       | 9.99999  | ???       |
| C5DIALCO       | 9.99999 | ???       | 9.99999  | ???       |
| ACCOMECO3      | 9.99999 | ???       | 9.99999  | ???       |
| MMALANHYO2     | 9.99999 | ???       | 9.99999  | ???       |
| TLFUONE        | 9.99999 | ???       | 9.99999  | ???       |
| C5DICARB       | 9.99999 | ???       | 9.99999  | ???       |
| MC3ODBCO2H     | 9.99999 | ???       | 9.99999  | ???       |
| C5CO14OH       | 9.99999 | ???       | 9.99999  | ???       |
| C5134CO2OH     | 9.99999 | ???       | 9.99999  | ???       |
| C5DIALOOH      | 9.99999 | ???       | 9.99999  | ???       |
| ACCOMEOCHO     | 9.99999 | ???       | 9.99999  | ???       |
| C5CO14OOH      | 9.99999 | ???       | 9.99999  | ???       |
| C24O3CCO2H     | 9.99999 | ???       | 9.99999  | ???       |
| MMALNHOOH      | 9.99999 | ???       | 9.99999  | ???       |
| ACCOMECO3H     | 9.99999 | ???       | 9.99999  | ???       |
| TLFUOOH        | 9.99999 | ???       | 9.99999  | ???       |
| C5DICAROOH     | 9.99999 | ???       | 9.99999  | ???       |
| CHOC3COPAN     | 9.99999 | ???       | 9.99999  | ???       |
| ZCPANC23DBCOD  | 9.99999 | ???       | 9.99999  | ???       |
| C5PAN9         | 9.99999 | ???       | 9.99999  | ???       |
| NC4CHO         | 9.99999 | ???       | 9.99999  | ???       |

| KPP name   | $K_a$   | Reference | $K_{a2}$ | Reference |
|------------|---------|-----------|----------|-----------|
| C514NO3    | 9.99999 | ???       | 9.99999  | ???       |
| NC4OHCPAN  | 9.99999 | ???       | 9.99999  | ???       |
| ISOPBNO3   | 9.99999 | ???       | 9.99999  | ???       |
| ISOPDNO3   | 9.99999 | ???       | 9.99999  | ???       |
| NISOPOOH   | 9.99999 | ???       | 9.99999  | ???       |
| NMBOBCO    | 9.99999 | ???       | 9.99999  | ???       |
| C4MCONO3OH | 9.99999 | ???       | 9.99999  | ???       |
| DB1NO3     | 9.99999 | ???       | 9.99999  | ???       |
| NC4OHCO3H  | 9.99999 | ???       | 9.99999  | ???       |
| C4CO2DBPAN | 9.99999 | ???       | 9.99999  | ???       |
| NC4MDCO2H  | 9.99999 | ???       | 9.99999  | ???       |
| C5COO2NO2  | 9.99999 | ???       | 9.99999  | ???       |
| ACCOMEPAN  | 9.99999 | ???       | 9.99999  | ???       |
| NTLFUOOH   | 9.99999 | ???       | 9.99999  | ???       |
| LHC4ACCHO  | 9.99999 | ???       | 9.99999  | ???       |
| LHC4ACCO2H | 9.99999 | ???       | 9.99999  | ???       |
| LHC4ACCO3H | 9.99999 | ???       | 9.99999  | ???       |
| LIEPOX     | 9.99999 | ???       | 9.99999  | ???       |
| LISOPACOOH | 9.99999 | ???       | 9.99999  | ???       |
| LC578OOH   | 9.99999 | ???       | 9.99999  | ???       |
| LMBOABOOH  | 9.99999 | ???       | 9.99999  | ???       |
| LC5PAN1719 | 9.99999 | ???       | 9.99999  | ???       |
| LISOPACNO3 | 9.99999 | ???       | 9.99999  | ???       |
| LNMBOABOOH | 9.99999 | ???       | 9.99999  | ???       |
| LMBOABNO3  | 9.99999 | ???       | 9.99999  | ???       |
| LNISOOH    | 9.99999 | ???       | 9.99999  | ???       |
| C614CO     | 9.99999 | ???       | 9.99999  | ???       |
| CO235C6OOH | 9.99999 | ???       | 9.99999  | ???       |
| C614OOH    | 9.99999 | ???       | 9.99999  | ???       |
| PBZQONE    | 9.99999 | ???       | 9.99999  | ???       |
| CATECHOL   | 9.99999 | ???       | 9.99999  | ???       |
| C6CO4DB    | 9.99999 | ???       | 9.99999  | ???       |
| PBZQCO     | 9.99999 | ???       | 9.99999  | ???       |
| C6H5O      | 9.99999 | ???       | 9.99999  | ???       |
| CATEC1O    | 9.99999 | ???       | 9.99999  | ???       |
| C5CO2DBCO3 | 9.99999 | ???       | 9.99999  | ???       |
| C5CO2DCO3H | 9.99999 | ???       | 9.99999  | ???       |
| C5CO2OHCO3 | 9.99999 | ???       | 9.99999  | ???       |
| BENZENE    | 9.99999 | ???       | 9.99999  | ???       |
| PHENOL     | 9.99999 | ???       | 9.99999  | ???       |
| C6H5OOH    | 9.99999 | ???       | 9.99999  | ???       |
| BZEPOXMUC  | 9.99999 | ???       | 9.99999  | ???       |
| C6125CO    | 9.99999 | ???       | 9.99999  | ???       |
| CATEC1OOH  | 9.99999 | ???       | 9.99999  | ???       |
| BZEMUCCO2H | 9.99999 | ???       | 9.99999  | ???       |
| BZOBIPEROH | 9.99999 | ???       | 9.99999  | ???       |
| BZEMUCCO   | 9.99999 | ???       | 9.99999  | ???       |
| PBZQOOH    | 9.99999 | ???       | 9.99999  | ???       |
| BZEMUCCO3H | 9.99999 | ???       | 9.99999  | ???       |



| KPP name   | $K_a$   | Reference   | $K_{a2}$ | Reference |
|------------|---------|-------------|----------|-----------|
| C5COOHCO3H | 9.99999 | ???         | 9.99999  | ???       |
| C615CO2OOH | 9.99999 | ???         | 9.99999  | ???       |
| BZBIPEROOH | 9.99999 | ???         | 9.99999  | ???       |
| PHENOOH    | 9.99999 | ???         | 9.99999  | ???       |
| BZEMUCOOH  | 9.99999 | ???         | 9.99999  | ???       |
| C614NO3    | 9.99999 | ???         | 9.99999  | ???       |
| NPHEN1O    | 9.99999 | ???         | 9.99999  | ???       |
| DNPHEN     | 9.99999 | ???         | 9.99999  | ???       |
| HOC6H4NO2  | 9.99999 | ???         | 9.99999  | ???       |
| NCATECHOL  | 9.99999 | ???         | 9.99999  | ???       |
| NPHEN1OOH  | 9.99999 | ???         | 9.99999  | ???       |
| BZEMUCPAN  | 9.99999 | ???         | 9.99999  | ???       |
| C5CO2DBPAN | 9.99999 | ???         | 9.99999  | ???       |
| NBZQOOH    | 9.99999 | ???         | 9.99999  | ???       |
| C5CO2OHPAN | 9.99999 | ???         | 9.99999  | ???       |
| NDNPHENOOH | 9.99999 | ???         | 9.99999  | ???       |
| DNPHENOOH  | 9.99999 | ???         | 9.99999  | ???       |
| NNCATECOOH | 9.99999 | ???         | 9.99999  | ???       |
| BZBIPERNO3 | 9.99999 | ???         | 9.99999  | ???       |
| BZEMUCNO3  | 9.99999 | ???         | 9.99999  | ???       |
| NPHENOOH   | 9.99999 | ???         | 9.99999  | ???       |
| NCATECOOH  | 9.99999 | ???         | 9.99999  | ???       |
| CO235C6CHO | 9.99999 | ???         | 9.99999  | ???       |
| C235C6CO3H | 9.99999 | ???         | 9.99999  | ???       |
| C716OOH    | 9.99999 | ???         | 9.99999  | ???       |
| C721OOH    | 9.99999 | ???         | 9.99999  | ???       |
| C722OOH    | 9.99999 | ???         | 9.99999  | ???       |
| BENZAL     | 9.99999 | ???         | 9.99999  | ???       |
| PHCOOH     | 6.25E-5 | Lide (2008) | 9.99999  | ???       |
| PTLQONE    | 9.99999 | ???         | 9.99999  | ???       |
| C6H5CO3H   | 9.99999 | ???         | 9.99999  | ???       |
| C7CO4DB    | 9.99999 | ???         | 9.99999  | ???       |
| PTLQCO     | 9.99999 | ???         | 9.99999  | ???       |
| TOL1O      | 9.99999 | ???         | 9.99999  | ???       |
| MCATEC1O   | 9.99999 | ???         | 9.99999  | ???       |
| TOLUENE    | 9.99999 | ???         | 9.99999  | ???       |
| CRESOL     | 9.99999 | ???         | 9.99999  | ???       |
| OXYL1OOH   | 9.99999 | ???         | 9.99999  | ???       |
| C6H5CH2OOH | 9.99999 | ???         | 9.99999  | ???       |
| MCATECHOL  | 9.99999 | ???         | 9.99999  | ???       |
| TLEPOXMUC  | 9.99999 | ???         | 9.99999  | ???       |
| MCATEC1OOH | 9.99999 | ???         | 9.99999  | ???       |
| TLEMUCCO2H | 9.99999 | ???         | 9.99999  | ???       |
| TLOBIPEROH | 9.99999 | ???         | 9.99999  | ???       |
| PTLQOOH    | 9.99999 | ???         | 9.99999  | ???       |
| TLEMUCCO   | 9.99999 | ???         | 9.99999  | ???       |
| TLEMUCCO3H | 9.99999 | ???         | 9.99999  | ???       |
| C6COOHCO3H | 9.99999 | ???         | 9.99999  | ???       |
| TLBIPEROOH | 9.99999 | ???         | 9.99999  | ???       |

| KPP name   | $K_a$     | Reference | $K_{a2}$  | Reference |
|------------|-----------|-----------|-----------|-----------|
| CRESOOH    | 9.99999   | ???       | 9.99999   | ???       |
| TLEMUCOOH  | 9.99999   | ???       | 9.99999   | ???       |
| C7PAN3     | 9.99999   | ???       | 9.99999   | ???       |
| PBZN       | 9.99999   | ???       | 9.99999   | ???       |
| NCRES1O    | 9.99999   | ???       | 9.99999   | ???       |
| DNCRES     | 9.99999   | ???       | 9.99999   | ???       |
| TOL1OHNO2  | 9.99999   | ???       | 9.99999   | ???       |
| C6H5CH2NO3 | 9.99999   | ???       | 9.99999   | ???       |
| MNCATECH   | 9.99999   | ???       | 9.99999   | ???       |
| NCRES1OOH  | 9.99999   | ???       | 9.99999   | ???       |
| NPTLQOOH   | 9.99999   | ???       | 9.99999   | ???       |
| TLEMUCPAN  | 9.99999   | ???       | 9.99999   | ???       |
| C6CO2OHPAN | 9.99999   | ???       | 9.99999   | ???       |
| NDNCRESOOH | 9.99999   | ???       | 9.99999   | ???       |
| DNCRESOOH  | 9.99999   | ???       | 9.99999   | ???       |
| MNNCATCOOH | 9.99999   | ???       | 9.99999   | ???       |
| TLBIPERNO3 | 9.99999   | ???       | 9.99999   | ???       |
| TLEMUCNO3  | 9.99999   | ???       | 9.99999   | ???       |
| NCRESOOH   | 9.99999   | ???       | 9.99999   | ???       |
| MNCATECOOH | 9.99999   | ???       | 9.99999   | ???       |
| C8BCCO     | 9.99999   | ???       | 9.99999   | ???       |
| C8BCOOH    | 9.99999   | ???       | 9.99999   | ???       |
| C721CHO    | 9.99999   | ???       | 9.99999   | ???       |
| NORPINIC   | 6.166E-05 | see notes | 2.291E-06 | see notes |
| C721CO3H   | 9.99999   | ???       | 9.99999   | ???       |
| C8BC       | 9.99999   | ???       | 9.99999   | ???       |
| C85OOH     | 9.99999   | ???       | 9.99999   | ???       |
| C86OOH     | 9.99999   | ???       | 9.99999   | ???       |
| C812OOH    | 9.99999   | ???       | 9.99999   | ???       |
| C813OOH    | 9.99999   | ???       | 9.99999   | ???       |
| C89OOH     | 9.99999   | ???       | 9.99999   | ???       |
| C810OOH    | 9.99999   | ???       | 9.99999   | ???       |
| STYRENE    | 9.99999   | ???       | 9.99999   | ???       |
| LXYL       | 9.99999   | ???       | 9.99999   | ???       |
| EBENZ      | 9.99999   | ???       | 9.99999   | ???       |
| STYRENOOH  | 9.99999   | ???       | 9.99999   | ???       |
| C8BCNO3    | 9.99999   | ???       | 9.99999   | ???       |
| C721PAN    | 9.99999   | ???       | 9.99999   | ???       |
| C89NO3     | 9.99999   | ???       | 9.99999   | ???       |
| C810NO3    | 9.99999   | ???       | 9.99999   | ???       |
| NSTYRENOOH | 9.99999   | ???       | 9.99999   | ???       |
| NOPINDCO   | 9.99999   | ???       | 9.99999   | ???       |
| C85CO3H    | 9.99999   | ???       | 9.99999   | ???       |
| NOPINONE   | 9.99999   | ???       | 9.99999   | ???       |
| NOPINOO    | 9.99999   | ???       | 9.99999   | ???       |
| NORPINAL   | 9.99999   | ???       | 9.99999   | ???       |
| NORPINENOL | 9.99999   | ???       | 9.99999   | ???       |
| C89CO2H    | 9.99999   | ???       | 9.99999   | ???       |
| NOPINDOOH  | 9.99999   | ???       | 9.99999   | ???       |

| KPP name       | $K_a$     | Reference | $K_{a2}$  | Reference |
|----------------|-----------|-----------|-----------|-----------|
| RO6R3P         | 9.99999   | ???       | 9.99999   | ???       |
| C89CO3H        | 9.99999   | ???       | 9.99999   | ???       |
| PINIC          | 6.166E-05 | see notes | 2.291E-06 | see notes |
| C811CO3H       | 9.99999   | ???       | 9.99999   | ???       |
| C96OOH         | 9.99999   | ???       | 9.99999   | ???       |
| C97OOH         | 9.99999   | ???       | 9.99999   | ???       |
| C98OOH         | 9.99999   | ???       | 9.99999   | ???       |
| C89PAN         | 9.99999   | ???       | 9.99999   | ???       |
| C9PAN2         | 9.99999   | ???       | 9.99999   | ???       |
| C811PAN        | 9.99999   | ???       | 9.99999   | ???       |
| C96NO3         | 9.99999   | ???       | 9.99999   | ???       |
| LTMB           | 9.99999   | ???       | 9.99999   | ???       |
| C109CO         | 9.99999   | ???       | 9.99999   | ???       |
| PINALOOH       | 9.99999   | ???       | 9.99999   | ???       |
| APINENE        | 9.99999   | ???       | 9.99999   | ???       |
| BPINENE        | 9.99999   | ???       | 9.99999   | ???       |
| CARENE         | 9.99999   | ???       | 9.99999   | ???       |
| SABINENE       | 9.99999   | ???       | 9.99999   | ???       |
| CAMPHENE       | 9.99999   | ???       | 9.99999   | ???       |
| PINAL          | 9.99999   | ???       | 9.99999   | ???       |
| PINENOL        | 9.99999   | ???       | 9.99999   | ???       |
| MENTHEN6ONE    | 9.99999   | ???       | 9.99999   | ???       |
| PINONIC        | 9.99999   | ???       | 9.99999   | ???       |
| C109OOH        | 9.99999   | ???       | 9.99999   | ???       |
| PERPINONIC     | 9.99999   | ???       | 9.99999   | ???       |
| C106OOH        | 9.99999   | ???       | 9.99999   | ???       |
| OH2MENTHEN6ONE | 9.99999   | ???       | 9.99999   | ???       |
| BPINAOOH       | 9.99999   | ???       | 9.99999   | ???       |
| RO6R3OOH       | 9.99999   | ???       | 9.99999   | ???       |
| PINALNO3       | 9.99999   | ???       | 9.99999   | ???       |
| C10PAN2        | 9.99999   | ???       | 9.99999   | ???       |
| C106NO3        | 9.99999   | ???       | 9.99999   | ???       |
| BPINANO3       | 9.99999   | ???       | 9.99999   | ???       |
| RO6R1NO3       | 9.99999   | ???       | 9.99999   | ???       |
| RO6R3NO3       | 9.99999   | ???       | 9.99999   | ???       |
| ROO6R1NO3      | 9.99999   | ???       | 9.99999   | ???       |
| LAPINABOOH     | 9.99999   | ???       | 9.99999   | ???       |
| LAPINABNO3     | 9.99999   | ???       | 9.99999   | ???       |
| LNAPINABOOH    | 9.99999   | ???       | 9.99999   | ???       |
| LNBPINABOOH    | 9.99999   | ???       | 9.99999   | ???       |
| LHAROM         | 9.99999   | ???       | 9.99999   | ???       |
| CHF3           | 9.99999   | ???       | 9.99999   | ???       |
| CHF2CF3        | 9.99999   | ???       | 9.99999   | ???       |
| CH3CF3         | 9.99999   | ???       | 9.99999   | ???       |
| CH2F2          | 9.99999   | ???       | 9.99999   | ???       |
| CH3CHF2        | 9.99999   | ???       | 9.99999   | ???       |
| Cl2            | 9.99999   | ???       | 9.99999   | ???       |
| HCl            | 9.99999   | ???       | 9.99999   | ???       |
| HOCl           | 9.99999   | ???       | 9.99999   | ???       |

| KPP name   | $K_a$   | Reference                  | $K_{a2}$ | Reference                  |
|------------|---------|----------------------------|----------|----------------------------|
| CINO3      | 9.99999 | ???                        | 9.99999  | ???                        |
| CH3Cl      | 9.99999 | ???                        | 9.99999  | ???                        |
| CHF2Cl     | 9.99999 | ???                        | 9.99999  | ???                        |
| CH2FCF3    | 9.99999 | ???                        | 9.99999  | ???                        |
| CF2ClCFC12 | 9.99999 | ???                        | 9.99999  | ???                        |
| CH2Cl2     | 9.99999 | ???                        | 9.99999  | ???                        |
| CH3CFC12   | 9.99999 | ???                        | 9.99999  | ???                        |
| CF2ClCF2Cl | 9.99999 | ???                        | 9.99999  | ???                        |
| CHCl3      | 9.99999 | ???                        | 9.99999  | ???                        |
| CF3CF2Cl   | 9.99999 | ???                        | 9.99999  | ???                        |
| Br2        | 9.99999 | ???                        | 9.99999  | ???                        |
| HBr        | 9.99999 | ???                        | 9.99999  | ???                        |
| HOBr       | 9.99999 | ???                        | 9.99999  | ???                        |
| BrNO3      | 9.99999 | ???                        | 9.99999  | ???                        |
| BrCl       | 9.99999 | ???                        | 9.99999  | ???                        |
| CH3Br      | 9.99999 | ???                        | 9.99999  | ???                        |
| CHCl2Br    | 9.99999 | ???                        | 9.99999  | ???                        |
| CHClBr2    | 9.99999 | ???                        | 9.99999  | ???                        |
| CH2ClBr    | 9.99999 | ???                        | 9.99999  | ???                        |
| CH2Br2     | 9.99999 | ???                        | 9.99999  | ???                        |
| CHBr3      | 9.99999 | ???                        | 9.99999  | ???                        |
| I2         | 9.99999 | ???                        | 9.99999  | ???                        |
| IO         | 9.99999 | ???                        | 9.99999  | ???                        |
| OIO        | 9.99999 | ???                        | 9.99999  | ???                        |
| I2O2       | 9.99999 | ???                        | 9.99999  | ???                        |
| HI         | 9.99999 | ???                        | 9.99999  | ???                        |
| HOI        | 9.99999 | ???                        | 9.99999  | ???                        |
| HIO3       | 9.99999 | ???                        | 9.99999  | ???                        |
| INO2       | 9.99999 | ???                        | 9.99999  | ???                        |
| INO3       | 9.99999 | ???                        | 9.99999  | ???                        |
| ICl        | 9.99999 | ???                        | 9.99999  | ???                        |
| CH2ClI     | 9.99999 | ???                        | 9.99999  | ???                        |
| IBr        | 9.99999 | ???                        | 9.99999  | ???                        |
| SO2        | 1.23E-2 | Pandis and Seinfeld (1989) | 6.61E-8  | Pandis and Seinfeld (1989) |
| H2SO4      | 1E3     | see notes                  | 1.023E-2 | see notes                  |
| CH3SO3H    | 9.99999 | ???                        | 9.99999  | ???                        |
| DMS        | 9.99999 | ???                        | 9.99999  | ???                        |
| DMSO       | 9.99999 | ???                        | 9.99999  | ???                        |
| CH3SO2     | 9.99999 | ???                        | 9.99999  | ???                        |
| CH3SO3     | 9.99999 | ???                        | 9.99999  | ???                        |
| Hg         | 9.99999 | ???                        | 9.99999  | ???                        |
| HgO        | 9.99999 | ???                        | 9.99999  | ???                        |
| HgCl       | 9.99999 | ???                        | 9.99999  | ???                        |
| HgCl2      | 9.99999 | ???                        | 9.99999  | ???                        |
| HgBr       | 9.99999 | ???                        | 9.99999  | ???                        |
| HgBr2      | 9.99999 | ???                        | 9.99999  | ???                        |
| ClHgBr     | 9.99999 | ???                        | 9.99999  | ???                        |
| BrHgOBr    | 9.99999 | ???                        | 9.99999  | ???                        |
| ClHgOBr    | 9.99999 | ???                        | 9.99999  | ???                        |

| KPP name   | $K_a$   | Reference | $K_{a2}$ | Reference |
|------------|---------|-----------|----------|-----------|
| ClHgOBr    | 9.99999 | ???       | 9.99999  | ???       |
| ISON       | 9.99999 | ???       | 9.99999  | ???       |
| ISOOH      | 9.99999 | ???       | 9.99999  | ???       |
| LTERP      | 9.99999 | ???       | 9.99999  | ???       |
| LALK4      | 9.99999 | ???       | 9.99999  | ???       |
| LALK5      | 9.99999 | ???       | 9.99999  | ???       |
| LARO1      | 9.99999 | ???       | 9.99999  | ???       |
| LARO2      | 9.99999 | ???       | 9.99999  | ???       |
| LOLE1      | 9.99999 | ???       | 9.99999  | ???       |
| LOLE2      | 9.99999 | ???       | 9.99999  | ???       |
| LfPOG02    | 9.99999 | ???       | 9.99999  | ???       |
| LfPOG03    | 9.99999 | ???       | 9.99999  | ???       |
| LfPOG04    | 9.99999 | ???       | 9.99999  | ???       |
| LfPOG05    | 9.99999 | ???       | 9.99999  | ???       |
| LbbPOG02   | 9.99999 | ???       | 9.99999  | ???       |
| LbbPOG03   | 9.99999 | ???       | 9.99999  | ???       |
| LbbPOG04   | 9.99999 | ???       | 9.99999  | ???       |
| LfSOGsv01  | 9.99999 | ???       | 9.99999  | ???       |
| LfSOGsv02  | 9.99999 | ???       | 9.99999  | ???       |
| LbbSOGsv01 | 9.99999 | ???       | 9.99999  | ???       |
| LbbSOGsv02 | 9.99999 | ???       | 9.99999  | ???       |
| LfSOGiv01  | 9.99999 | ???       | 9.99999  | ???       |
| LfSOGiv02  | 9.99999 | ???       | 9.99999  | ???       |
| LfSOGiv03  | 9.99999 | ???       | 9.99999  | ???       |
| LfSOGiv04  | 9.99999 | ???       | 9.99999  | ???       |
| LbbSOGiv01 | 9.99999 | ???       | 9.99999  | ???       |
| LbbSOGiv02 | 9.99999 | ???       | 9.99999  | ???       |
| LbbSOGiv03 | 9.99999 | ???       | 9.99999  | ???       |
| LbSOGv01   | 9.99999 | ???       | 9.99999  | ???       |
| LbSOGv02   | 9.99999 | ???       | 9.99999  | ???       |
| LbSOGv03   | 9.99999 | ???       | 9.99999  | ???       |
| LbSOGv04   | 9.99999 | ???       | 9.99999  | ???       |
| LbOSOGv01  | 9.99999 | ???       | 9.99999  | ???       |
| LbOSOGv02  | 9.99999 | ???       | 9.99999  | ???       |
| LbOSOGv03  | 9.99999 | ???       | 9.99999  | ???       |
| LaSOGv01   | 9.99999 | ???       | 9.99999  | ???       |
| LaSOGv02   | 9.99999 | ???       | 9.99999  | ???       |
| LaSOGv03   | 9.99999 | ???       | 9.99999  | ???       |
| LaSOGv04   | 9.99999 | ???       | 9.99999  | ???       |
| LaOSOGv01  | 9.99999 | ???       | 9.99999  | ???       |
| LaOSOGv02  | 9.99999 | ???       | 9.99999  | ???       |
| LaOSOGv03  | 9.99999 | ???       | 9.99999  | ???       |

| KPP name   | pss      | Reference | dryreac  | Reference |
|------------|----------|-----------|----------|-----------|
| O2         | 0.0      | ???       | 0.0      | ???       |
| O3         | 0.01     | ???       | 1.0      | ???       |
| H          | -9.99999 | ???       | -9.99999 | ???       |
| H2         | -9.99999 | ???       | -9.99999 | ???       |
| OH         | 25.      | ???       | 0.0      | ???       |
| HO2        | 1.37E6   | ???       | 1.0      | ???       |
| H2O        | 0.0      | ???       | 0.0      | ???       |
| H2O2       | 7.45E4   | ???       | 1.0      | ???       |
| NH3        | 1.02E4   | ???       | 0.0      | ???       |
| NO         | 2.E-3    | ???       | 1.0      | ???       |
| NO2        | 1.0E-2   | ???       | 1.0      | ???       |
| NO3        | 1.8      | ???       | 1.0      | ???       |
| N2O5       | 1.E4     | ???       | 1.0      | ???       |
| HONO       | 5.05E4   | ???       | 0.1      | ???       |
| HNO3       | 1.E4     | ???       | 1.0      | ???       |
| HNO4       | 1.E4     | ???       | 1.0      | ???       |
| NH2        | -9.99999 | ???       | 0.0      | ???       |
| HNO        | -9.99999 | ???       | 0.0      | ???       |
| NHOH       | -9.99999 | ???       | 0.0      | ???       |
| NH2O       | -9.99999 | ???       | 0.0      | ???       |
| NH2OH      | -9.99999 | ???       | 0.0      | ???       |
| CH4        | -9.99999 | ???       | -9.99999 | ???       |
| CH3        | -9.99999 | ???       | -9.99999 | ???       |
| CH3O       | -9.99999 | ???       | -9.99999 | ???       |
| CO         | -9.99999 | ???       | -9.99999 | ???       |
| CO2        | 0.0      | ???       | 0.0      | ???       |
| HCHO       | 3.2E3    | ???       | 0.1      | ???       |
| HCOOH      | 6.7E6    | ???       | 0.0      | ???       |
| CH3O2      | 6.       | ???       | 1.0      | ???       |
| HOCH2O2    | 4.6E4    | ???       | 1.0      | ???       |
| CH3OH      | 2.2E2    | ???       | 0.1      | ???       |
| CH3OOH     | 3.E2     | ???       | 0.1      | ???       |
| HOCH2OOH   | 1.7E6    | ???       | 0.1      | ???       |
| HOCH2OH    | 1.7E6    | ???       | 0.1      | ???       |
| CH3ONO     | 2.       | ???       | 0.1      | ???       |
| CH3NO3     | 2.       | ???       | 0.1      | ???       |
| CH3O2NO2   | 2.       | ???       | 0.1      | ???       |
| HOCH2O2NO2 | 2.       | ???       | 0.1      | ???       |
| HCN        | 7.6      | ???       | 0.1      | ???       |
| CH2CO      | 1.0E6    | ???       | 0.1      | ???       |
| GLYOX      | 4.2E5    | ???       | 0.1      | ???       |
| HCOCO2H    | 6.6E7    | ???       | 0.1      | ???       |
| HCOCO3H    | 2.7E6    | ???       | 0.1      | ???       |
| CH2CHOH    | 2.0E2    | ???       | 0.1      | ???       |
| CH3CHO     | 1.3E1    | ???       | 0.1      | ???       |
| CH3CO2H    | 7.4E5    | ???       | 0.1      | ???       |
| HOCH2CHO   | 4.10E4   | ???       | 0.1      | ???       |
| HOCH2CHO   | 1.0E6    | ???       | 0.1      | ???       |
| CH3CO3H    | 8.4E2    | ???       | 0.1      | ???       |

| KPP name      | pss    | Reference | dryreac  | Reference |
|---------------|--------|-----------|----------|-----------|
| HOCH2CO2H     | 4.2E7  | ???       | 0.1      | ???       |
| HOCH2CO3H     | 4.2E5  | ???       | 0.1      | ???       |
| HOCH2CO2H     | 4.2E7  | ???       | 0.1      | ???       |
| HOCH2CO3H     | 1.0E6  | ???       | 0.1      | ???       |
| C2H5O2        | 0.0    | ???       | 0.0      | ???       |
| C2H5OH        | 2.0E2  | ???       | 0.1      | ???       |
| C2H5OOH       | 3.4E2  | ???       | 0.1      | ???       |
| ETHGLY        | 4.0E6  | ???       | 0.1      | ???       |
| HYETHO2H      | 4.0E6  | ???       | 0.1      | ???       |
| CH3CHOHOOH    | 1.0E6  | ???       | 0.1      | ???       |
| NO3CH2PAN     | 2.8    | ???       | 0.1      | ???       |
| CH3CN         | 5.3    | ???       | 0.1      | ???       |
| NO3CH2CHO     | 1.6    | ???       | 0.1      | ???       |
| PAN           | 2.8    | ???       | 0.1      | ???       |
| PHAN          | 4.E4   | ???       | 0.1      | ???       |
| ETHOHNO3      | 3.9E4  | ???       | 0.1      | ???       |
| C2H5NO3       | 1.6    | ???       | 0.1      | ???       |
| C2H5O2NO2     | 1.6    | ???       | 0.1      | ???       |
| OXL           | 3.26E6 | ???       | 0.1      | ???       |
| C33CO         | 9.0E3  | ???       | 0.1      | ???       |
| ALCOCH2OOH    | 1.0E6  | ???       | 0.1      | ???       |
| MGLYOX        | 3.7E3  | ???       | 0.1      | ???       |
| HOCH2COCHO    | 4.1E5  | ???       | 0.1      | ???       |
| HCOCH2CHO     | 1.0E6  | ???       | 0.1      | ???       |
| HCOCH2CO2H    | 6.6E7  | ???       | 0.1      | ???       |
| HCOCH2CO3H    | 1.0E6  | ???       | 0.1      | ???       |
| CH3COCH3      | 3.E1   | ???       | 0.1      | ???       |
| ACETOL        | 4.7E2  | ???       | -9.99999 | ???       |
| HYPERACET     | 4.7E2  | ???       | 0.1      | ???       |
| HOC2H4CO2H    | 4.2E7  | ???       | 0.1      | ???       |
| HOC2H4CO3H    | 1.0E6  | ???       | 0.1      | ???       |
| IC3H7OOH      | 1.3E2  | ???       | 0.1      | ???       |
| HYPPO2H       | 9.2E5  | ???       | 0.1      | ???       |
| CH3CHCO       | 1.0E6  | ???       | 0.1      | ???       |
| CH3COCO2H     | 4.3E8  | ???       | 0.1      | ???       |
| CH3COCO3H     | 1.0E6  | ???       | 0.1      | ???       |
| HCOCOCH2OOH   | 1.0E6  | ???       | 0.1      | ???       |
| C2H5CHO       | 1.3E1  | ???       | 0.1      | ???       |
| PROPENOL      | 1.3E1  | ???       | 0.1      | ???       |
| C2H5CO2H      | 3.E5   | ???       | 0.1      | ???       |
| C2H5CO3H      | 1.5E3  | ???       | 0.1      | ???       |
| HOCH2COCH2OOH | 1.0E6  | ???       | 0.1      | ???       |
| IPROPOL       | 1.3E2  | ???       | 0.1      | ???       |
| NROPOL        | 1.3E2  | ???       | 0.1      | ???       |
| NC3H7OOH      | 1.3E2  | ???       | 0.1      | ???       |
| C3DIALOOH     | 9.0E3  | ???       | 0.1      | ???       |
| METACETHO     | 3.7E3  | ???       | 0.1      | ???       |
| C32OH13CO     | 9.0E3  | ???       | 0.1      | ???       |
| HCOCOCHCO3H   | 2.0E6  | ???       | 0.1      | ???       |

| KPP name      | pss    | Reference | dryreac | Reference |
|---------------|--------|-----------|---------|-----------|
| C3PAN2        | 1.0E6  | ???       | 0.1     | ???       |
| NOA           | 1.0E3  | ???       | 0.1     | ???       |
| CH3COCH2O2NO2 | 1.0E3  | ???       | 0.1     | ???       |
| PPN           | 2.8    | ???       | 0.1     | ???       |
| C3PAN1        | 1.0E6  | ???       | 0.1     | ???       |
| NC3H7NO3      | 0.83E0 | ???       | 0.1     | ???       |
| IC3H7NO3      | 0.83E0 | ???       | 0.1     | ???       |
| PROPOLNO3     | 4.5E3  | ???       | 0.1     | ???       |
| PR2O2HNO3     | 1.1E4  | ???       | 0.1     | ???       |
| HCOCOHPAN     | 4.0E4  | ???       | 0.1     | ???       |
| HCOCCH3CO     | 1.0E6  | ???       | 0.1     | ???       |
| CH3COCHCO     | 1.0E6  | ???       | 0.1     | ???       |
| C4CODIAL      | 1.0E6  | ???       | 0.1     | ???       |
| CO2C3CHO      | 3.6E5  | ???       | 0.1     | ???       |
| C312COCO3H    | 1.0E6  | ???       | 0.1     | ???       |
| CO2H3CHO      | 4.1E5  | ???       | 0.1     | ???       |
| BIACETO2      | 1.0E6  | ???       | 0.1     | ???       |
| CHOC3COO2     | 1.0E6  | ???       | 0.1     | ???       |
| MACR          | 5.0E1  | ???       | 0.1     | ???       |
| MVK           | 2.3E1  | ???       | 0.1     | ???       |
| BIACET        | 7.4E1  | ???       | 0.1     | ???       |
| MACO2H        | 5.8E5  | ???       | 0.1     | ???       |
| HVMK          | 1.7E3  | ???       | 0.1     | ???       |
| HMAC          | 1.7E3  | ???       | 0.1     | ???       |
| CO2C3CHO      | 1.7E3  | ???       | 0.1     | ???       |
| IBUTDIAL      | 1.7E3  | ???       | 0.1     | ???       |
| MACO3H        | 3.4E3  | ???       | 0.1     | ???       |
| BIACETOH      | 1.3E3  | ???       | 0.1     | ???       |
| CH3COOHCHCHO  | 1.0E6  | ???       | 0.1     | ???       |
| HCOCCH3CHOOH  | 1.0E6  | ???       | 0.1     | ???       |
| C413COOOH     | 1.0E6  | ???       | 0.1     | ???       |
| BIACETOOH     | 1.0E6  | ???       | 0.1     | ???       |
| CH3COCOCO2H   | 4.3E8  | ???       | 0.1     | ???       |
| CO2H3CO2H     | 1.0E6  | ???       | 0.1     | ???       |
| C44OOH        | 1.0E6  | ???       | 0.1     | ???       |
| CO2H3CO3H     | 1.E6   | ???       | 0.1     | ???       |
| MACRN         | 1.0E6  | ???       | 0.1     | ???       |
| MVKNO3        | 1.0E6  | ???       | 0.1     | ???       |
| PIPN          | 2.9    | ???       | 0.1     | ???       |
| MEK           | 2.E1   | ???       | 0.1     | ???       |
| HO12CO3C4     | 5.E7   | ???       | 0.1     | ???       |
| MACROH        | 5.E7   | ???       | 0.1     | ???       |
| MACROOH       | 5.E7   | ???       | 0.1     | ???       |
| BUTENOL       | 8.9    | ???       | 0.1     | ???       |
| C3H7CHO       | 8.9    | ???       | 0.1     | ???       |
| IPRCHO        | 5.9E-1 | ???       | 0.1     | ???       |
| MPROPENOL     | 5.9E-1 | ???       | 0.1     | ???       |
| IBUTALOH      | 1.0E6  | ???       | 0.1     | ???       |
| BUT2OLO       | 1.0E3  | ???       | 0.1     | ???       |



| KPP name      | pss    | Reference | dryreac  | Reference |
|---------------|--------|-----------|----------|-----------|
| PERIBUACID    | 9.7E2  | ???       | 0.1      | ???       |
| IPRHOCO2H     | 4.2E7  | ???       | 0.1      | ???       |
| IPRHOCO3H     | 1.0E6  | ???       | 0.1      | ???       |
| IC4H9NO3      | 6.4E-3 | ???       | 0.1      | ???       |
| TC4H9NO3      | 6.4E-3 | ???       | 0.1      | ???       |
| BUT2OLNO3     | 8.8E1  | ???       | 0.1      | ???       |
| TC4H9OOH      | 7.0E1  | ???       | 0.1      | ???       |
| IC4H9OOH      | 1.1E2  | ???       | 0.1      | ???       |
| IBUTOLBOOH    | 1.0E6  | ???       | 0.1      | ???       |
| BUT2OLOOH     | 1.0E6  | ???       | 0.1      | ???       |
| MALANHY       | 36.    | ???       | 0.1      | ???       |
| CO2C4DIAL     | 2.0E6  | ???       | 0.1      | ???       |
| MALNHYOHCO    | 2.0E6  | ???       | 0.1      | ???       |
| BZFUONE       | 36.    | ???       | 0.1      | ???       |
| MALDIAL       | 3.6E5  | ???       | 0.1      | ???       |
| MALDALCO2H    | 6.6E7  | ???       | 0.1      | ???       |
| EPXC4DIAL     | 3.6E5  | ???       | 0.1      | ???       |
| HOCOC4DIAL    | 3.1E5  | ???       | 0.1      | ???       |
| MALDALCO3H    | 9.0E3  | ???       | 0.1      | ???       |
| BZFUCO        | 9.0E3  | ???       | 0.1      | ???       |
| EPXDLCO2H     | 6.6E7  | ???       | 0.1      | ???       |
| CO14O3CHO     | 3.6E5  | ???       | 0.1      | ???       |
| CO14O3CO2H    | 6.6E7  | ???       | 0.1      | ???       |
| EPXDLCO3H     | 9.0E3  | ???       | 0.1      | ???       |
| MALANHYOOH    | 2.0E6  | ???       | 0.1      | ???       |
| MALDIALOOH    | 2.0E6  | ???       | 0.1      | ???       |
| BZFUOOH       | 2.0E6  | ???       | 0.1      | ???       |
| MECOACEOOH    | 3.1E5  | ???       | 0.1      | ???       |
| C312COPAN     | 1.0E6  | ???       | 0.1      | ???       |
| MPAN          | 3.6    | ???       | 0.1      | ???       |
| IBUTOLBNO3    | 8.8E1  | ???       | 0.1      | ???       |
| C4PAN5        | 1.0E6  | ???       | 0.1      | ???       |
| NC4DCO2H      | 6.6E7  | ???       | 0.1      | ???       |
| MALDIALPAN    | 2.8    | ???       | 0.1      | ???       |
| NBZFUONE      | 20.    | ???       | 0.1      | ???       |
| EPXDLPAN      | 2.8    | ???       | 0.1      | ???       |
| NBZFUOOH      | 2.4E4  | ???       | 0.1      | ???       |
| LMEKOOH       | 1.E3   | ???       | 0.1      | ???       |
| LHMVKABOOH    | 5.E6   | ???       | -9.99999 | ???       |
| LC4H9OOH      | 1.1E2  | ???       | 0.1      | ???       |
| LBUT1ENOOH    | 1.0E6  | ???       | 0.1      | ???       |
| LMEKNO3       | 0.86E0 | ???       | 0.1      | ???       |
| LC4H9NO3      | 6.4E-3 | ???       | 0.1      | ???       |
| LBUT1ENNO3    | 8.8E1  | ???       | 0.1      | ???       |
| ME3FURAN      | 1.0E6  | ???       | 0.1      | ???       |
| ZCODC23DBCOD  | 1.0E6  | ???       | 0.1      | ???       |
| CO13C4CHO     | 1.0E6  | ???       | 0.1      | ???       |
| CO23C4CHO     | 1.0E6  | ???       | 0.1      | ???       |
| ZCO3HC23DBCOD | 1.0E6  | ???       | 0.1      | ???       |

| KPP name       | pss      | Reference | dryreac | Reference |
|----------------|----------|-----------|---------|-----------|
| C513CO         | 1.0E6    | ???       | 0.1     | ???       |
| CHOC3COOOH     | 1.0E6    | ???       | 0.1     | ???       |
| CO23C4CO3H     | 1.0E6    | ???       | 0.1     | ???       |
| C5H8           | 0.01     | ???       | 0.0     | ???       |
| HCOC5          | 4.7E2    | ???       | 0.1     | ???       |
| ZCODOC23DBC00H | 1.0E6    | ???       | 0.1     | ???       |
| MBOCOCO        | 1.0E6    | ???       | 0.1     | ???       |
| C511OOH        | 1.0E6    | ???       | 0.1     | ???       |
| C514OOH        | 1.0E6    | ???       | 0.1     | ???       |
| C512OOH        | 1.0E6    | ???       | 0.1     | ???       |
| C1ODC2OOHC4OD  | 1.0E6    | ???       | 0.1     | ???       |
| C513OOH        | 1.0E6    | ???       | 0.1     | ???       |
| C1ODC2O2C4OOH  | 1.0E6    | ???       | 0.1     | ???       |
| C1ODC3O2C4OOH  | 1.0E6    | ???       | 0.1     | ???       |
| MBO            | 1.0E6    | ???       | 0.1     | ???       |
| ISOPAOH        | 4.E6     | ???       | 0.1     | ???       |
| ISOPBOH        | 3.E6     | ???       | 0.1     | ???       |
| ISOPDOH        | 3.E6     | ???       | 0.1     | ???       |
| ISOPBOOH       | 3.E6     | ???       | 0.1     | ???       |
| ISOPDOOH       | 3.E6     | ???       | 0.1     | ???       |
| MBOACO         | 1.0E6    | ???       | 0.1     | ???       |
| DB1OOH         | 1.0E6    | ???       | 0.1     | ???       |
| C59OOH         | 3.E11    | ???       | 0.1     | ???       |
| C1OOHC2OOHC4OD | 1.0E6    | ???       | 0.1     | ???       |
| DB2OOH         | 1.0E6    | ???       | 0.1     | ???       |
| C4CO2DBC03     | -9.99999 | ???       | 0.1     | ???       |
| MMALANHY       | 20.      | ???       | 0.1     | ???       |
| C54CO          | 3.6E5    | ???       | 0.1     | ???       |
| C4CO2DCO3H     | 2.0E6    | ???       | 0.1     | ???       |
| C5DIALCO       | 9.0E3    | ???       | 0.1     | ???       |
| ACCOMECO3      | -9.99999 | ???       | 0.1     | ???       |
| MMALANHYO2     | -9.99999 | ???       | 0.1     | ???       |
| TLFUONE        | 3.6E1    | ???       | 0.1     | ???       |
| C5DICARB       | 3.7E3    | ???       | 0.1     | ???       |
| MC3ODBCO2H     | 6.6E7    | ???       | 0.1     | ???       |
| C5CO14OH       | 2.2E3    | ???       | 0.1     | ???       |
| C5134CO2OH     | 3.1E5    | ???       | 0.1     | ???       |
| C5DIALOOH      | 3.6E5    | ???       | 0.1     | ???       |
| ACCOMECCHO     | 3.7E3    | ???       | 0.1     | ???       |
| C5CO14OOH      | 3.1E5    | ???       | 0.1     | ???       |
| C24O3CCO2H     | 7.4E5    | ???       | 0.1     | ???       |
| MMALNHYOOH     | 2.0E6    | ???       | 0.1     | ???       |
| ACCOMECO3H     | 3.1E5    | ???       | 0.1     | ???       |
| TLFUOOH        | 2.0E6    | ???       | 0.1     | ???       |
| C5DICAROOH     | 2.0E6    | ???       | 0.1     | ???       |
| CHOC3COPAN     | 1.0E6    | ???       | 0.1     | ???       |
| ZCPANC23DBCOD  | 1.E1     | ???       | 0.1     | ???       |
| C5PAN9         | 1.0E6    | ???       | 0.1     | ???       |
| NC4CHO         | 9.6      | ???       | 0.1     | ???       |

| KPP name   | pss      | Reference | dryreac | Reference |
|------------|----------|-----------|---------|-----------|
| C514NO3    | 1.0E6    | ???       | 0.1     | ???       |
| NC4OHCPAN  | 1.0E6    | ???       | 0.1     | ???       |
| ISOPBNO3   | 8.9E3    | ???       | 0.1     | ???       |
| ISOPDNO3   | 8.9E3    | ???       | 0.1     | ???       |
| NISOPOOH   | 2.E4     | ???       | 0.1     | ???       |
| NMBOBCO    | 1.0E6    | ???       | 0.1     | ???       |
| C4MCONO3OH | 1.0E6    | ???       | 0.1     | ???       |
| DB1NO3     | 1.0E4    | ???       | 0.1     | ???       |
| NC4OHCO3H  | 1.0E6    | ???       | 0.1     | ???       |
| C4CO2DBPAN | 4.0E4    | ???       | 0.1     | ???       |
| NC4MDCO2H  | 6.6E7    | ???       | 0.1     | ???       |
| C5COO2NO2  | 2.8      | ???       | 0.1     | ???       |
| ACCOMEPAN  | 2.8      | ???       | 0.1     | ???       |
| NTLFUOOH   | 9.0E3    | ???       | 0.1     | ???       |
| LHC4ACCHO  | 4.E5     | ???       | 0.1     | ???       |
| LHC4ACCO2H | 6.6E7    | ???       | 0.1     | ???       |
| LHC4ACCO3H | 2.2E5    | ???       | 0.1     | ???       |
| LIEPOX     | 1.0E6    | ???       | 0.1     | ???       |
| LISOPACOOH | 4.E6     | ???       | 0.1     | ???       |
| LC578OOH   | 3.E11    | ???       | 0.1     | ???       |
| LMBOABOOH  | 1.0E6    | ???       | 0.1     | ???       |
| LC5PAN1719 | 6.E4     | ???       | 0.1     | ???       |
| LISOPACNO3 | 2.E4     | ???       | 0.1     | ???       |
| LNMBOABOOH | 1.0E6    | ???       | 0.1     | ???       |
| LMBOABNO3  | 1.0E6    | ???       | 0.1     | ???       |
| LNISOOH    | 6.E3     | ???       | 0.1     | ???       |
| C614CO     | 1.0E6    | ???       | 0.1     | ???       |
| CO235C6OOH | 1.0E6    | ???       | 0.1     | ???       |
| C614OOH    | 1.0E6    | ???       | 0.1     | ???       |
| PBZQONE    | 20.      | ???       | 0.1     | ???       |
| CATECHOL   | 4.6E3    | ???       | 0.1     | ???       |
| C6CO4DB    | 2.0E6    | ???       | 0.1     | ???       |
| PBZQCO     | 4.6E3    | ???       | 0.1     | ???       |
| C6H5O      | 2.9E3    | ???       | 0.1     | ???       |
| CATEC1O    | 4.6E3    | ???       | 0.1     | ???       |
| C5CO2DBCO3 | -9.99999 | ???       | 0.1     | ???       |
| C5CO2DCO3H | 2.0E6    | ???       | 0.1     | ???       |
| C5CO2OHCO3 | -9.99999 | ???       | 0.1     | ???       |
| BENZENE    | 1.8E-1   | ???       | 0.1     | ???       |
| PHENOL     | 2.9E3    | ???       | 0.1     | ???       |
| C6H5OOH    | 2.9E3    | ???       | 0.1     | ???       |
| BZEPOXMUC  | 3.6E5    | ???       | 0.1     | ???       |
| C6125CO    | 3.7E3    | ???       | 0.1     | ???       |
| CATEC1OOH  | 4.6E3    | ???       | 0.1     | ???       |
| BZEMUCCO2H | 6.6E7    | ???       | 0.1     | ???       |
| BZOBIPEROH | 9.0E3    | ???       | 0.1     | ???       |
| BZEMUCCO   | 9.0E3    | ???       | 0.1     | ???       |
| PBZQOOH    | 2.0E6    | ???       | 0.1     | ???       |
| BZEMUCCO3H | 9.0E3    | ???       | 0.1     | ???       |

| KPP name   | pss    | Reference | dryreac | Reference |
|------------|--------|-----------|---------|-----------|
| C5COOHCO3H | 2.0E6  | ???       | 0.1     | ???       |
| C615CO2OOH | 3.1E5  | ???       | 0.1     | ???       |
| BZBIPEROOH | 2.0E6  | ???       | 0.1     | ???       |
| PHENOOH    | 2.0E6  | ???       | 0.1     | ???       |
| BZEMUCOOH  | 2.0E6  | ???       | 0.1     | ???       |
| C614NO3    | 1.0E6  | ???       | 0.1     | ???       |
| NPHEN1O    | 70.    | ???       | 0.1     | ???       |
| DNPHEN     | 2.3E3  | ???       | 0.1     | ???       |
| HOC6H4NO2  | 70.    | ???       | 0.1     | ???       |
| NCATECHOL  | 4.6E3  | ???       | 0.1     | ???       |
| NPHEN1OOH  | 70.    | ???       | 0.1     | ???       |
| BZEMUCPAN  | 2.8    | ???       | 0.1     | ???       |
| C5CO2DBPAN | 3.7E3  | ???       | 0.1     | ???       |
| NBZQOOH    | 2.4E4  | ???       | 0.1     | ???       |
| C5CO2OHPAN | 4.0E4  | ???       | 0.1     | ???       |
| NDNPHENOOH | 2.3E3  | ???       | 0.1     | ???       |
| DNPHENOOH  | 2.3E3  | ???       | 0.1     | ???       |
| NNCATECOOH | 2.3E3  | ???       | 0.1     | ???       |
| BZBIPERNO3 | 2.9E3  | ???       | 0.1     | ???       |
| BZEMUCNO3  | 4.0E4  | ???       | 0.1     | ???       |
| NPHENOOH   | 4.6E3  | ???       | 0.1     | ???       |
| NCATECOOH  | 2.0E6  | ???       | 0.1     | ???       |
| CO235C6CHO | 1.0E6  | ???       | 0.1     | ???       |
| C235C6CO3H | 1.0E6  | ???       | 0.1     | ???       |
| C716OOH    | 1.0E6  | ???       | 0.1     | ???       |
| C721OOH    | 1.0E6  | ???       | 0.1     | ???       |
| C722OOH    | 1.0E6  | ???       | 0.1     | ???       |
| BENZAL     | 36.    | ???       | 0.1     | ???       |
| PHCOOH     | 1.5E7  | ???       | 0.1     | ???       |
| PTLQONE    | 41.    | ???       | 0.1     | ???       |
| C6H5CO3H   | 2.4E4  | ???       | 0.1     | ???       |
| C7CO4DB    | 3.7E3  | ???       | 0.1     | ???       |
| PTLQCO     | 2.4E4  | ???       | 0.1     | ???       |
| TOL1O      | 2.9E3  | ???       | 0.1     | ???       |
| MCATEC1O   | 2.0E6  | ???       | 0.1     | ???       |
| TOLUENE    | 1.5E-1 | ???       | 0.1     | ???       |
| CRESOL     | 2.9E3  | ???       | 0.1     | ???       |
| OXYL1OOH   | 2.9E3  | ???       | 0.1     | ???       |
| C6H5CH2OOH | 2.9E3  | ???       | 0.1     | ???       |
| MCATECHOL  | 4.6E3  | ???       | 0.1     | ???       |
| TLEPOXMUC  | 41.    | ???       | 0.1     | ???       |
| MCATEC1OOH | 4.6E3  | ???       | 0.1     | ???       |
| TLEMUCCO2H | 7.4E5  | ???       | 0.1     | ???       |
| TLOBIPEROH | 4.0E4  | ???       | 0.1     | ???       |
| PTLQOOH    | 2.0E6  | ???       | 0.1     | ???       |
| TLEMUCCO   | 3.1E5  | ???       | 0.1     | ???       |
| TLEMUCCO3H | 2.2E3  | ???       | 0.1     | ???       |
| C6COOHCO3H | 2.0E6  | ???       | 0.1     | ???       |
| TLBIPEROOH | 2.0E6  | ???       | 0.1     | ???       |

| KPP name   | pss    | Reference | dryreac | Reference |
|------------|--------|-----------|---------|-----------|
| CRESOOH    | 2.0E6  | ???       | 0.1     | ???       |
| TLEMUCOOH  | 2.0E6  | ???       | 0.1     | ???       |
| C7PAN3     | 1.0E6  | ???       | 0.1     | ???       |
| PBZN       | 70.    | ???       | 0.1     | ???       |
| NCRES1O    | 70.    | ???       | 0.1     | ???       |
| DNCRES     | 2.3E3  | ???       | 0.1     | ???       |
| TOL1OHNO2  | 7.0E1  | ???       | 0.1     | ???       |
| C6H5CH2NO3 | 36.    | ???       | 0.1     | ???       |
| MNCATECH   | 4.6E3  | ???       | 0.1     | ???       |
| NCRES1OOH  | 70.    | ???       | 0.1     | ???       |
| NPTLQOOH   | 2.4E4  | ???       | 0.1     | ???       |
| TLEMUCPAN  | 2.8    | ???       | 0.1     | ???       |
| C6CO2OHPAN | 4.0E4  | ???       | 0.1     | ???       |
| NDNCRESOOH | 2.3E3  | ???       | 0.1     | ???       |
| DNCRESOOH  | 2.3E3  | ???       | 0.1     | ???       |
| MNNCATCOOH | 2.3E3  | ???       | 0.1     | ???       |
| TLBIPERNO3 | 70.    | ???       | 0.1     | ???       |
| TLEMUCNO3  | 4.0E4  | ???       | 0.1     | ???       |
| NCRESOOH   | 4.6E3  | ???       | 0.1     | ???       |
| MNCATECOOH | 2.0E6  | ???       | 0.1     | ???       |
| C8BCCO     | 1.0E6  | ???       | 0.1     | ???       |
| C8BCOOH    | 1.0E6  | ???       | 0.1     | ???       |
| C721CHO    | 1.0E6  | ???       | 0.1     | ???       |
| NORPINIC   | 4E13   | ???       | 0.1     | ???       |
| C721CO3H   | 1.0E6  | ???       | 0.1     | ???       |
| C8BC       | 1.0E6  | ???       | 0.1     | ???       |
| C85OOH     | 1.0E6  | ???       | 0.1     | ???       |
| C86OOH     | 1.0E6  | ???       | 0.1     | ???       |
| C812OOH    | 1.0E6  | ???       | 0.1     | ???       |
| C813OOH    | 1.0E6  | ???       | 0.1     | ???       |
| C89OOH     | 1.0E6  | ???       | 0.1     | ???       |
| C810OOH    | 1.0E6  | ???       | 0.1     | ???       |
| STYRENE    | 3.7E-1 | ???       | 0.1     | ???       |
| LXYL       | 1.7E-1 | ???       | 0.1     | ???       |
| EBENZ      | 1.2E-1 | ???       | 0.1     | ???       |
| STYRENOOH  | 70.    | ???       | 0.1     | ???       |
| C8BCNO3    | 1.0E6  | ???       | 0.1     | ???       |
| C721PAN    | 1.0E6  | ???       | 0.1     | ???       |
| C89NO3     | 1.0E6  | ???       | 0.1     | ???       |
| C810NO3    | 1.0E6  | ???       | 0.1     | ???       |
| NSTYRENOOH | 70.    | ???       | 0.1     | ???       |
| NOPINDCO   | 1.0E6  | ???       | 0.1     | ???       |
| C85CO3H    | 1.0E6  | ???       | 0.1     | ???       |
| NOPINONE   | 1.0E6  | ???       | 0.1     | ???       |
| NOPINOO    | 1.0E6  | ???       | 0.1     | ???       |
| NORPINAL   | 1.0E6  | ???       | 0.1     | ???       |
| NORPINENOL | 1.0E6  | ???       | 0.1     | ???       |
| C89CO2H    | 6.6E7  | ???       | 0.1     | ???       |
| NOPINDOOH  | 1.0E6  | ???       | 0.1     | ???       |

| KPP name       | pss      | Reference | dryreac  | Reference |
|----------------|----------|-----------|----------|-----------|
| RO6R3P         | 1.0E6    | ???       | 0.1      | ???       |
| C89CO3H        | 1.0E6    | ???       | 0.1      | ???       |
| PINIC          | 4E13     | ???       | 0.1      | ???       |
| C811CO3H       | 1.0E6    | ???       | 0.1      | ???       |
| C96OOH         | 1.0E6    | ???       | 0.1      | ???       |
| C97OOH         | 1.0E6    | ???       | 0.1      | ???       |
| C98OOH         | 1.0E6    | ???       | 0.1      | ???       |
| C89PAN         | 1.0E6    | ???       | 0.1      | ???       |
| C9PAN2         | 1.0E6    | ???       | 0.1      | ???       |
| C811PAN        | 1.0E6    | ???       | 0.1      | ???       |
| C96NO3         | 1.0E6    | ???       | 0.1      | ???       |
| LTMB           | 2.2E-1   | ???       | 0.1      | ???       |
| C109CO         | 1.0E6    | ???       | 0.1      | ???       |
| PINALOOH       | 1.0E6    | ???       | 0.1      | ???       |
| APINENE        | 1.0E1    | ???       | 0.1      | ???       |
| BPINENE        | 1.0E1    | ???       | 0.1      | ???       |
| CARENE         | 1.0E1    | ???       | 0.1      | ???       |
| SABINENE       | 1.0E1    | ???       | 0.1      | ???       |
| CAMPHENE       | 1.0E1    | ???       | 0.1      | ???       |
| PINAL          | 1.0E6    | ???       | 0.1      | ???       |
| PINENOL        | 1.0E6    | ???       | 0.1      | ???       |
| MENTHEN6ONE    | 1.0E6    | ???       | 0.1      | ???       |
| PINONIC        | 7.4E5    | ???       | 0.1      | ???       |
| C109OOH        | 1.0E6    | ???       | 0.1      | ???       |
| PERPINONIC     | 7.4E5    | ???       | 0.1      | ???       |
| C106OOH        | 1.0E6    | ???       | 0.1      | ???       |
| OH2MENTHEN6ONE | 1.0E6    | ???       | 0.1      | ???       |
| BPINAOOH       | 1.0E6    | ???       | 0.1      | ???       |
| RO6R3OOH       | 1.0E6    | ???       | 0.1      | ???       |
| PINALNO3       | 1.0E6    | ???       | 0.1      | ???       |
| C10PAN2        | 1.0E6    | ???       | 0.1      | ???       |
| C106NO3        | 1.0E6    | ???       | 0.1      | ???       |
| BPINANO3       | 1.0E6    | ???       | 0.1      | ???       |
| RO6R1NO3       | 1.0E6    | ???       | 0.1      | ???       |
| RO6R3NO3       | 1.0E6    | ???       | 0.1      | ???       |
| ROO6R1NO3      | 1.0E6    | ???       | 0.1      | ???       |
| LAPINABOOH     | 1.0E6    | ???       | 0.1      | ???       |
| LAPINABNO3     | 1.0E6    | ???       | 0.1      | ???       |
| LNAPINABOOH    | 1.0E6    | ???       | 0.1      | ???       |
| LNBPINABOOH    | 1.0E6    | ???       | 0.1      | ???       |
| LHAROM         | 1.2E-1   | ???       | 0.1      | ???       |
| CHF3           | -9.99999 | ???       | -9.99999 | ???       |
| CHF2CF3        | -9.99999 | ???       | -9.99999 | ???       |
| CH3CF3         | -9.99999 | ???       | -9.99999 | ???       |
| CH2F2          | -9.99999 | ???       | -9.99999 | ???       |
| CH3CHF2        | -9.99999 | ???       | -9.99999 | ???       |
| Cl2            | 7.E-2    | ???       | 0.1      | ???       |
| HCl            | 1E14     | ???       | 1.0      | ???       |
| HOCl           | 6.7E2    | ???       | 1.0      | ???       |

| KPP name   | pss      | Reference | dryreac  | Reference |
|------------|----------|-----------|----------|-----------|
| CINO3      | 1.E30    | ???       | 1.0      | ???       |
| CH3Cl      | 9.4E-2   | ???       | 0.0      | ???       |
| CHF2Cl     | -9.99999 | ???       | -9.99999 | ???       |
| CH2FCF3    | -9.99999 | ???       | -9.99999 | ???       |
| CF2ClCFCl2 | -9.99999 | ???       | -9.99999 | ???       |
| CH2Cl2     | -9.99999 | ???       | -9.99999 | ???       |
| CH3CFC12   | -9.99999 | ???       | -9.99999 | ???       |
| CF2ClCF2Cl | -9.99999 | ???       | -9.99999 | ???       |
| CHCl3      | -9.99999 | ???       | -9.99999 | ???       |
| CF3CF2Cl   | -9.99999 | ???       | -9.99999 | ???       |
| Br2        | 0.7      | ???       | 0.1      | ???       |
| HBr        | 1.3E17   | ???       | 1.0      | ???       |
| HOBr       | 9.1E1    | ???       | 1.0      | ???       |
| BrNO3      | 1.0E30   | ???       | 1.0      | ???       |
| BrCl       | 1.0      | ???       | 0.1      | ???       |
| CH3Br      | 1.6E-1   | ???       | 0.0      | ???       |
| CHCl2Br    | 4.0E-1   | ???       | 0.0      | ???       |
| CHClBr2    | 8.7E-1   | ???       | 0.0      | ???       |
| CH2ClBr    | 1.1      | ???       | 0.0      | ???       |
| CH2Br2     | 1.1      | ???       | 0.0      | ???       |
| CHBr3      | 1.7      | ???       | 0.0      | ???       |
| I2         | 3.0      | ???       | 0.1      | ???       |
| IO         | 0.0      | ???       | 0.0      | ???       |
| OIO        | 0.0      | ???       | 0.0      | ???       |
| I2O2       | 0.0      | ???       | 0.0      | ???       |
| HI         | 1.E30    | ???       | 1.0      | ???       |
| HOI        | 1.E30    | ???       | 1.0      | ???       |
| HIO3       | 1.E30    | ???       | 1.0      | ???       |
| INO2       | 4.5      | ???       | 0.1      | ???       |
| INO3       | 1.E30    | ???       | 1.0      | ???       |
| ICl        | 1.1E2    | ???       | 0.1      | ???       |
| CH2ClI     | 2.4E1    | ???       | 0.1      | ???       |
| IBr        | 0.0      | ???       | 0.0      | ???       |
| SO2        | 2.45E5   | ???       | 0.0      | ???       |
| H2SO4      | 1.3E15   | ???       | 1.0      | ???       |
| CH3SO3H    | 1.E30    | ???       | 1.0      | ???       |
| DMS        | 0.0      | ???       | 0.0      | ???       |
| DMSO       | 5.E4     | ???       | 0.1      | ???       |
| CH3SO2     | -9.99999 | ???       | -9.99999 | ???       |
| CH3SO3     | -9.99999 | ???       | -9.99999 | ???       |
| Hg         | 0.13     | ???       | 0.1      | ???       |
| HgO        | 2.4E7    | ???       | 1.0      | ???       |
| HgCl       | 2.4E7    | ???       | 1.0      | ???       |
| HgCl2      | 2.4E7    | ???       | 1.0      | ???       |
| HgBr       | 2.4E7    | ???       | 1.0      | ???       |
| HgBr2      | 2.4E7    | ???       | 1.0      | ???       |
| ClHgBr     | 2.4E7    | ???       | 1.0      | ???       |
| BrHgOBr    | 2.4E7    | ???       | 1.0      | ???       |
| ClHgOBr    | 2.4E7    | ???       | 1.0      | ???       |

| KPP name   | pss    | Reference | dryreac | Reference |
|------------|--------|-----------|---------|-----------|
| ClHgOBr    | 2.4E7  | ???       | 1.0     | ???       |
| ISON       | 1.7E4  | ???       | 0.1     | ???       |
| ISOOH      | 1.7E6  | ???       | 0.1     | ???       |
| LTERP      | 4.9E-2 | ???       | 0.0     | ???       |
| LALK4      | 7.7E-4 | ???       | 0.0     | ???       |
| LALK5      | 2.5E-4 | ???       | 0.0     | ???       |
| LARO1      | 1.4E-1 | ???       | 0.0     | ???       |
| LARO2      | 1.4E-1 | ???       | 0.0     | ???       |
| LOLE1      | 5.0E-3 | ???       | 0.0     | ???       |
| LOLE2      | 5.0E-3 | ???       | 0.0     | ???       |
| LfPOG02    | 1.0E5  | ???       | 0.0     | ???       |
| LfPOG03    | 1.0E5  | ???       | 0.0     | ???       |
| LfPOG04    | 1.0E5  | ???       | 0.0     | ???       |
| LfPOG05    | 1.0E5  | ???       | 0.0     | ???       |
| LbbPOG02   | 1.0E5  | ???       | 0.0     | ???       |
| LbbPOG03   | 1.0E5  | ???       | 0.0     | ???       |
| LbbPOG04   | 1.0E5  | ???       | 0.0     | ???       |
| LfSOGsv01  | 1.0E5  | ???       | 0.0     | ???       |
| LfSOGsv02  | 1.0E5  | ???       | 0.0     | ???       |
| LbbSOGsv01 | 1.0E5  | ???       | 0.0     | ???       |
| LbbSOGsv02 | 1.0E5  | ???       | 0.0     | ???       |
| LfSOGiv01  | 1.0E5  | ???       | 0.0     | ???       |
| LfSOGiv02  | 1.0E5  | ???       | 0.0     | ???       |
| LfSOGiv03  | 1.0E5  | ???       | 0.0     | ???       |
| LfSOGiv04  | 1.0E5  | ???       | 0.0     | ???       |
| LbbSOGiv01 | 1.0E5  | ???       | 0.0     | ???       |
| LbbSOGiv02 | 1.0E5  | ???       | 0.0     | ???       |
| LbbSOGiv03 | 1.0E5  | ???       | 0.0     | ???       |
| LbSOGv01   | 1.0E5  | ???       | 0.0     | ???       |
| LbSOGv02   | 1.0E5  | ???       | 0.0     | ???       |
| LbSOGv03   | 1.0E5  | ???       | 0.0     | ???       |
| LbSOGv04   | 1.0E5  | ???       | 0.0     | ???       |
| LbOSOGv01  | 1.0E5  | ???       | 0.0     | ???       |
| LbOSOGv02  | 1.0E5  | ???       | 0.0     | ???       |
| LbOSOGv03  | 1.0E5  | ???       | 0.0     | ???       |
| LaSOGv01   | 1.0E5  | ???       | 0.0     | ???       |
| LaSOGv02   | 1.0E5  | ???       | 0.0     | ???       |
| LaSOGv03   | 1.0E5  | ???       | 0.0     | ???       |
| LaSOGv04   | 1.0E5  | ???       | 0.0     | ???       |
| LaOSOGv01  | 1.0E5  | ???       | 0.0     | ???       |
| LaOSOGv02  | 1.0E5  | ???       | 0.0     | ???       |
| LaOSOGv03  | 1.0E5  | ???       | 0.0     | ???       |



## Notes

### Henry's law constants

- BIG\_DP is a large number that represents infinite solubility in the code.
- The temperature dependence of the Henry constants is:

$$K_H = K_H^\ominus \times \exp\left(\frac{-\Delta_{\text{soln}}H}{R} \left(\frac{1}{T} - \frac{1}{T^\ominus}\right)\right)$$

where  $\Delta_{\text{soln}}H$  = molar enthalpy of dissolution [J/mol] and  $R = 8.314$  J/(mol K).

- **NO2**: The temperature dependence is from Chameides (1984).
- **HNO3**: Calculated using the acidity constant from Davis and de Bruin (1964).
- **CH3O2**: This value was estimated by Jacob (1986).
- **C2H5O2**: Assumed to be the same as for CH3O2.
- **HBr**: Calculated using the acidity constant from Lax (1969).
- **HOBr**: Twice the value of HOCl, according to Blatchley et al. (1992). Same temperature dependence as for HOCl assumed.
- **IO**: Assumed to be the same as for HOI.
- **HOI**: Lower limit.
- **ICl**: Calculated using thermodynamic data from Wagman et al. (1982).
- **IBr**: Calculated using thermodynamic data from Wagman et al. (1982).
- **H2SO4**: To account for the very high Henry's law coefficient of H2SO4, a very high value was chosen arbitrarily.
- **DMSO**: Lower limit cited from another reference.
- **HgBr2**: Assumed to be the same as for HgCl2.
- **ClHgBr**: Assumed to be the same as for HgCl2.
- **BrHgOBr**: Assumed to be the same as for HgCl2.
- **ClHgOBr**: Assumed to be the same as for HgCl2.

### Accommodation coefficients

- If the accommodation coefficient is not known, a value of  $\alpha = 0.1$  is assumed.
- The temperature dependence of the accommodation coefficients is given by (Jayne et al., 1991):

$$\begin{aligned}\frac{\alpha}{1-\alpha} &= \exp\left(\frac{-\Delta_{\text{obs}}G}{RT}\right) \\ &= \exp\left(\frac{-\Delta_{\text{obs}}H}{RT} + \frac{\Delta_{\text{obs}}S}{R}\right)\end{aligned}$$

where  $\Delta_{\text{obs}}G$  is the Gibbs free energy barrier of the transition state toward solution (Jayne et al., 1991), and  $\Delta_{\text{obs}}H$  and  $\Delta_{\text{obs}}S$  are the corresponding enthalpy and entropy, respectively. The equation can be rearranged to:

$$\ln\left(\frac{\alpha}{1-\alpha}\right) = \frac{-\Delta_{\text{obs}}H}{R} \times \frac{1}{T} + \frac{-\Delta_{\text{obs}}S}{R}$$

and further:

$$d \ln\left(\frac{\alpha}{1-\alpha}\right) / d\left(\frac{1}{T}\right) = \frac{-\Delta_{\text{obs}}H}{R}$$

- **O2:** Estimate.
- **O3:** Value measured at 292 K.
- **OH:** Value measured at 293 K.
- **HO2:** Value for aqueous salts at 293 K.
- **NH3:** Value measured at 295 K.
- **NO:** Value measured between 193 and 243 K.
- **NO2:** Value measured at 298 K.
- **NO3:** Value is a lower limit, measured at 273 K.
- **N2O5:** Value for sulfuric acid, measured between 195 and 300 K.
- **HONO:** Value measured between 247 and 297 K.
- **HNO3:** Value measured at room temperature. Abbatt and Waschewsky (1998) say  $\gamma > 0.2$ . Here  $\alpha = 0.5$  is used.
- **HNO4:** Value measured at 200 K for water ice.
- **CH3O2:** Estimate.
- **CO2:** Estimate.
- **HCHO:** Value measured between 260 and 270 K.
- **PAN:** Estimate.
- **C2H5O2:** Estimate.
- **CH3CHO:** Using the same estimate as in the CAPRAM 2.4 model (Ervens et al., 2003).
- **HCl:** Temperature dependence derived from published data at 2 different temperatures
- **HOCl:** Assumed to be the same as  $\alpha(\text{HOBr})$ .
- **ClNO3:** Value measured at 274.5 K.
- **HBr:** Temperature dependence derived from published data at 2 different temperatures
- **HOBr:** Value measured at room temperature. Abbatt and Waschewsky (1998) say  $\gamma > 0.2$ . Here  $\alpha = 0.5$  is used.

- **BrNO3:** Value measured at 273 K.
- **BrCl:** Assumed to be the same as  $\alpha(\text{Cl}_2)$ .
- **I2:** Estimate.
- **IO:** Estimate.
- **OIO:** Estimate.
- **I2O2:** Estimate.
- **HI:** Temperature dependence derived from published data at 2 different temperatures
- **HOI:** Assumed to be the same as  $\alpha(\text{HOBr})$ . See also Mössinger and Cox (2001) and Holmes et al. (2001).
- **HIO3:** Estimate.
- **INO2:** Estimate.
- **INO3:** Estimate.
- **ICl:** Estimate.
- **IBr:** Assumed to be the same as  $\alpha(\text{ICl})$ .
- **H2SO4:** Value measured at 303 K.
- **Hg:** Estimate.
- **HgO:** Estimate.
- **HgCl2:** Estimate.
- **HgBr2:** Estimate.
- **ClHgBr:** Estimate.
- **BrHgOBr:** Estimate.
- **ClHgOBr:** Estimate.

#### Acid/base constants

- **pinic acid:** The same  $R_K\text{acid}$  and  $R_K\text{acid2}$  values as for succinic acid from Haynes (2014) are used.
- **norpinic acid:** The same  $R_K\text{acid}$  and  $R_K\text{acid2}$  values as for succinic acid from Haynes (2014) are used.
- **H2SO4:** From Wikipedia.

## References

- Abbatt, J. P. D. and Waschewsky, G. C. G.: Heterogeneous interactions of HOBr, HNO<sub>3</sub>, O<sub>3</sub>, and NO<sub>2</sub> with deliquescent NaCl aerosols at room temperature, *J. Phys. Chem. A*, 102, 3719–3725, 1998.
- Abraham, M. H.: Thermodynamics of solution of homologous series of solutes in water, *J. Chem. Soc. Faraday Trans. 1*, 80, 153–181, 1984.
- Bartlett, W. P. and Margerum, D. W.: Temperature dependencies of the Henry’s law constant and the aqueous phase dissociation constant of bromine chloride, *Environ. Sci. Technol.*, 33, 3410–3414, 1999.
- Betterton, E. A. and Hoffmann, M. R.: Henry’s law constants of some environmentally important aldehydes, *Environ. Sci. Technol.*, 22, 1415–1418, 1988.
- Blatchley, III, E. R., Johnson, R. W., Alleman, J. E., and McCoy, W. F.: Effective Henry’s law constants for free chlorine and free bromine, *Wat. Res.*, 26, 99–106, 1992.
- Braban, C. F., Adams, J. W., Rodriguez, D., Cox, R. A., Crowley, J. N., and Schuster, G.: Heterogeneous reactions of HOI, ICl and IBr on sea salt and sea salt proxies, *Phys. Chem. Chem. Phys.*, 9, 3136–3148, 2007.
- Brimblecombe, P. and Clegg, S. L.: Erratum, *J. Atmos. Chem.*, 8, 95, 1989.
- Brimblecombe, P., Clegg, S. L., and Khan, I.: Thermodynamic properties of carboxylic acids relevant to their solubility in aqueous solutions, *J. Aerosol Sci.*, 23, S901–S904, 1992.
- Burkholder, J. B., Sander, S. P., Abbatt, J., Barker, J. R., Huie, R. E., Kolb, C. E., Kurylo, M. J., Orkin, V. L., Wilmouth, D. M., and Wine, P. H.: Chemical Kinetics and Photochemical Data for Use in Atmospheric Studies, Evaluation No. 18, JPL Publication 15-10, Jet Propulsion Laboratory, Pasadena, <http://jpldataeval.jpl.nasa.gov>, 2015.
- Chameides, W. L.: The photochemistry of a remote marine stratiform cloud, *J. Geophys. Res.*, 89D, 4739–4755, 1984.
- Chatfield, R. B. and Crutzen, P. J.: Are there interactions of iodine and sulfur species in marine air photochemistry?, *J. Geophys. Res.*, 95D, 22 319–22 341, 1990.
- Davidovits, P., Hu, J. H., Worsnop, D. R., Zahniser, M. S., and Kolb, C. E.: Entry of gas molecules into liquids, *Faraday Discuss.*, 100, 65–81, 1995.
- Davis, Jr., W. and de Bruin, H. J.: New activity coefficients of 0-100 per cent aqueous nitric acid, *J. Inorg. Nucl. Chem.*, 26, 1069–1083, 1964.
- De Bruyn, W. J., Shorter, J. A., Davidovits, P., Worsnop, D. R., Zahniser, M. S., and Kolb, C. E.: Uptake of gas-phase sulfur species methanesulfonic acid, dimethylsulfoxide, and dimethyl sulfone by aqueous surfaces, *J. Geophys. Res.*, 99D, 16 927–16 932, 1994.
- Deiber, G., George, C., Le Calvé, S., Schweitzer, F., and Mirabel, P.: Uptake study of ClONO<sub>2</sub> and BrONO<sub>2</sub> by halide containing droplets, *Atmos. Chem. Phys.*, 4, 1291–1299, 2004.
- DeMore, W. B., Sander, S. P., Golden, D. M., Hampson, R. F., Kurylo, M. J., Howard, C. J., Ravishankara, A. R., Kolb, C. E., and Molina, M. J.: Chemical kinetics and photochemical data for use in stratospheric modeling. Evaluation number 12, JPL Publication 97-4, Jet Propulsion Laboratory, Pasadena, CA, 1997.
- Dong, H., Du, H., and Qian, X.: Theoretical prediction of pK<sub>a</sub> values for methacrylic acid oligomers using combined quantum mechanical and continuum solvation methods, *J. Phys. Chem. A*, 112, 12 687–12 694, doi:10.1021/jp807315p, 2008.

- Ervens, B., George, C., Williams, J. E., Buxton, G. V., Salmon, G. A., Bydder, M., Wilkinson, F., Dentener, F., Mirabel, P., Wolke, R., and Herrmann, H.: CAPRAM 2.4 (MODAC mechanism): An extended and condensed tropospheric aqueous phase mechanism and its application, *J. Geophys. Res.*, 108D, 4426, doi:10.1029/2002JD002202, 2003.
- Goldstein, D. J.: Air and steam stripping of toxic pollutants, Tech. Rep. EPA-68-03-002, Industrial Environmental Research Laboratory, Cincinnati, OH, USA, 1982.
- Hanson, D. R., Burkholder, J. B., Howard, C. J., and Ravishankara, A. R.: Measurement of OH and HO<sub>2</sub> radical uptake coefficients on water and sulfuric acid surfaces, *J. Phys. Chem.*, 96, 4979–4985, 1992.
- Haynes, W. M., ed.: CRC Handbook of Chemistry and Physics, 95th Edition (Internet Version 2015), Taylor and Francis Group, 2014.
- Holmes, N. S., Adams, J. W., and Crowley, J. N.: Uptake and reaction of HOI and IONO<sub>2</sub> on frozen and dry NaCl/NaBr surfaces and H<sub>2</sub>SO<sub>4</sub>, *Phys. Chem. Chem. Phys.*, 3, 1679–1687, 2001.
- Hu, J. H., Shi, Q., Davidovits, P., Worsnop, D. R., Zahniser, M. S., and Kolb, C. E.: Reactive uptake of Cl<sub>2</sub>(g) and Br<sub>2</sub>(g) by aqueous surfaces as a function of Br<sup>−</sup> and I<sup>−</sup> ion concentration: The effect of chemical reaction at the interface, *J. Phys. Chem.*, 99, 8768–8776, 1995.
- Huthwelker, T., Clegg, S. L., Peter, T., Carslaw, K., Luo, B. P., and Brimblecombe, P.: Solubility of HOCl in water and aqueous H<sub>2</sub>SO<sub>4</sub> to stratospheric temperatures, *J. Atmos. Chem.*, 21, 81–95, 1995.
- Ip, H. S. S., Huang, X. H. H., and Yu, J. Z.: Effective Henry’s law constants of glyoxal, glyoxylic acid, and glycolic acid, *Geophys. Res. Lett.*, 36, L01802, doi:10.1029/2008GL036212, 2009.
- Jacob, D. J.: Chemistry of OH in remote clouds and its role in the production of formic acid and peroxy-monosulfate, *J. Geophys. Res.*, 91D, 9807–9826, 1986.
- Jayne, J. T., Duan, S. X., Davidovits, P., Worsnop, D. R., Zahniser, M. S., and Kolb, C. E.: Uptake of gas-phase alcohol and organic acid molecules by water surfaces, *J. Phys. Chem.*, 95, 6329–6336, 1991.
- Khan, I., Brimblecombe, P., and Clegg, S. L.: The Henry’s law constants of pyruvic and methacrylic acids, *Environ. Technol.*, 13, 587–593, 1992.
- Khan, I., Brimblecombe, P., and Clegg, S. L.: Solubilities of pyruvic acid and the lower (C<sub>1</sub>–C<sub>6</sub>) carboxylic acids. Experimental determination of equilibrium vapour pressures above pure aqueous and salt solutions, *J. Atmos. Chem.*, 22, 285–302, 1995.
- Lax, E.: Taschenbuch für Chemiker und Physiker, Springer Verlag, Berlin, 1969.
- Lee, Y.-N. and Schwartz, S. E.: Reaction kinetics of nitrogen dioxide with liquid water at low partial pressure, *J. Phys. Chem.*, 85, 840–848, 1981.
- Lide, D. R., ed.: CRC Handbook of Chemistry and Physics, 88th Edition (Internet Version 2008), CRC Press/Taylor and Francis, Boca Raton, FL, 2008.
- Lind, J. A. and Kok, G. L.: Correction to “Henry’s law determinations for aqueous solutions of hydrogen peroxide, methylhydroperoxide, and peroxyacetic acid” by John A. Lind and Gregory L. Kok, *J. Geophys. Res.*, 99D, 21 119, 1994.
- Magi, L., Schweitzer, F., Pallares, C., Cherif, S., Mirabel, P., and George, C.: Investigation of the uptake rate of ozone and methyl hydroperoxide by water surfaces, *J. Phys. Chem. A*, 101, 4943–4949, 1997.
- Mössinger, J. C. and Cox, R. A.: Heterogeneous reaction of HOI with sodium halide salts, *J. Phys. Chem. A*, 105, 5165–5177, 2001.

- Palmer, D. A., Ramette, R. W., and Mesmer, R. E.: The hydrolysis of iodine: Equilibria at high temperatures, *J. Nucl. Mater.*, 130, 280–286, 1985.
- Pandis, S. N. and Seinfeld, J. H.: Sensitivity analysis of a chemical mechanism for aqueous-phase atmospheric chemistry, *J. Geophys. Res.*, 94D, 1105–1126, 1989.
- Ponche, J. L., George, C., and Mirabel, P.: Mass transfer at the air/water interface: Mass accommodation coefficients of SO<sub>2</sub>, HNO<sub>3</sub>, NO<sub>2</sub> and NH<sub>3</sub>, *J. Atmos. Chem.*, 16, 1–21, 1993.
- Pöschl, U., Canagaratna, M., Jayne, J. T., Molina, L. T., Worsnop, D. R., Kolb, C. E., and Molina, M. J.: Mass accommodation coefficient of H<sub>2</sub>SO<sub>4</sub> vapor on aqueous sulfuric acid surfaces and gaseous diffusion coefficient of H<sub>2</sub>SO<sub>4</sub> in N<sub>2</sub>/H<sub>2</sub>O, *J. Phys. Chem. A*, 102, 10082–10089, 1998.
- Régimbal, J.-M. and Mozurkewich, M.: Peroxynitric acid decay mechanisms and kinetics at low pH, *J. Phys. Chem. A*, 101, 8822–8829, 1997.
- Rudich, Y., Talukdar, R. K., Imamura, T., Fox, R. W., and Ravishankara, A. R.: Uptake of NO<sub>3</sub> on KI solutions: Rate coefficient for the NO<sub>3</sub> + I<sup>−</sup> reaction and gas-phase diffusion coefficients for NO<sub>3</sub>, *Chem. Phys. Lett.*, 261, 467–473, 1996.
- Saastad, O. W., Ellermann, T., and Nielsen, C. J.: On the adsorption of NO and NO<sub>2</sub> on cold H<sub>2</sub>O/H<sub>2</sub>SO<sub>4</sub> surfaces, *Geophys. Res. Lett.*, 20, 1191–1193, 1993.
- Sander, S. P., Friedl, R. R., Golden, D. M., Kurylo, M. J., Moortgat, G. K., Keller-Rudek, H., Wine, P. H., Ravishankara, A. R., Kolb, C. E., Molina, M. J., Finlayson-Pitts, B. J., Huie, R. E., and Orkin, V. L.: Chemical Kinetics and Photochemical Data for Use in Atmospheric Studies, Evaluation Number 15, JPL Publication 06-2, Jet Propulsion Laboratory, Pasadena, CA, <http://jpldataeval.jpl.nasa.gov>, 2006.
- Sander, S. P., Abbatt, J., Barker, J. R., Burkholder, J. B., Friedl, R. R., Golden, D. M., Huie, R. E., Kolb, C. E., Kurylo, M. J., Moortgat, G. K., Orkin, V. L., and Wine, P. H.: Chemical Kinetics and Photochemical Data for Use in Atmospheric Studies, Evaluation No. 17, JPL Publication 10-6, Jet Propulsion Laboratory, Pasadena, <http://jpldataeval.jpl.nasa.gov>, 2011.
- Schroeder, W. H. and Munthe, J.: Atmospheric mercury – An overview, *Atmos. Environ.*, 32, 809–822, 1998.
- Schwartz, S. E. and White, W. H.: Solubility equilibria of the nitrogen oxides and oxyacids in dilute aqueous solution, in: *Advances in Environmental Science and Engineering*, edited by Pfafflin, J. R. and Ziegler, E. N., vol. 4, pp. 1–45, Gordon and Breach Science Publishers, NY, 1981.
- Schweitzer, F., Mirabel, P., and George, C.: Uptake of hydrogen halides by water droplets, *J. Phys. Chem. A*, 104, 72–76, 2000.
- Shon, Z.-H., Kim, K.-H., Kim, M.-Y., and Lee, M.: Modeling study of reactive gaseous mercury in the urban air, *Atmos. Environ.*, 39, 749–761, 2005.
- Snider, J. R. and Dawson, G. A.: Tropospheric light alcohols, carbonyls, and acetonitrile: Concentrations in the southwestern United States and Henry’s law data, *J. Geophys. Res.*, 90D, 3797–3805, 1985.
- Staudinger, J. and Roberts, P. V.: A critical compilation of Henry’s law constant temperature dependence relations for organic compounds in dilute aqueous solutions, *Chemosphere*, 44, 561–576, 2001.
- Takami, A., Kato, S., Shimono, A., and Koda, S.: Uptake coefficient of OH radical on aqueous surface, *Chem. Phys.*, 231, 215–227, 1998.

- Thomas, K., Volz-Thomas, A., and Kley, D.: Zur Wechselwirkung von  $\text{NO}_3$ -Radikalen mit wässrigen Lösungen: Bestimmung des Henry- und des Massenakkommodationskoeffizienten, Ph.D. thesis, Institut für Chemie und Dynamik der Geosphäre 2, Forschungszentrum Jülich GmbH, Germany, 1993.
- Thornton, J. and Abbatt, J. P. D.: Measurements of  $\text{HO}_2$  uptake to aqueous aerosol: Mass accommodation coefficients and net reactive loss, *J. Geophys. Res.*, 110D, doi:10.1029/2004JD005402, 2005.
- Wagman, D. D., Evans, W. H., Parker, V. B., Schumm, R. H., Halow, I., Bailey, S. M., Churney, K. L., and Nuttall, R. L.: The NBS tables of chemical thermodynamic properties; Selected values for inorganic and  $\text{C}_1$  and  $\text{C}_2$  organic substances in SI units, *J. Phys. Chem. Ref. Data*, 11, suppl. 2, 1982.
- Wilhelm, E., Battino, R., and Wilcock, R. J.: Low-pressure solubility of gases in liquid water, *Chem. Rev.*, 77, 219–262, 1977.
- Worsnop, D. R., Zahniser, M. S., Kolb, C. E., Gardner, J. A., Watson, L. R., van Doren, J. M., Jayne, J. T., and Davidovits, P.: The temperature dependence of mass accommodation of  $\text{SO}_2$  and  $\text{H}_2\text{O}_2$  on aqueous surfaces, *J. Phys. Chem.*, 93, 1159–1172, 1989.
