# Supplementary material for: Halogen activation in the plume of Masaya volcano: field observations and box model investigations
Source: Copernicus journal article supplement (doi:10.5194/acp-21-3371-2021), 2021-03-04
Supplement: Supplementary file 14 [file acp-21-3371-2021-supplement.zip]

# The Chemical Mechanism of MECCA

KPP version: 2.2.3\_rs3

MECCA version: 3.8m

Date: November 14, 2020.

Selected reactions:

“Tr && (G | | (Aa && Mb1)) && !C && !Hg”

Number of aerosol phases: 1

Number of species in selected mechanism:

Gas phase: 325

Aqueous phase: 148

All species: 473

Number of reactions in selected mechanism:

Gas phase (Gnn): 185

Aqueous phase (Annn): 25

Henry (Hnnn): 47

Photolysis (Jnnn): 49

Aqueous phase photolysis (PHnnn): 0

Heterogeneous (HETnnn): 0

Equilibria (EQnn): 34

Isotope exchange (IEXnnn): 0

Tagging equations (TAGnnn): 0

Dummy (Dnn): 1

All equations: 341

Table 1: Gas phase reactions

| #     | labels   | reaction                                                                          | rate coefficient                                                                                                 | reference                 |
|-------|----------|-----------------------------------------------------------------------------------|------------------------------------------------------------------------------------------------------------------|---------------------------|
| G1000 | UpStTrG  | $\text{O}_2 + \text{O}(^1\text{D}) \rightarrow \text{O}(^3\text{P}) + \text{O}_2$ | $3.3\text{E-}11*\text{EXP}(55./\text{temp})$                                                                     | Burkholder et al. (2015)  |
| G1001 | UpStTrG  | $\text{O}_2 + \text{O}(^3\text{P}) \rightarrow \text{O}_3$                        | $6.0\text{E-}34*((\text{temp}/300.)^{**}(-2.4))$<br>*cair                                                        | Burkholder et al. (2015)  |
| G2100 | UpStTrG  | $\text{H} + \text{O}_2 \rightarrow \text{HO}_2$                                   | $\text{k\_3rd}(\text{temp}, \text{cair}, 4.4\text{E-}32, 1.3,$<br>$7.5\text{E-}11, -0.2, 0.6)$                   | Burkholder et al. (2015)  |
| G2104 | UpStTrG  | $\text{OH} + \text{O}_3 \rightarrow \text{HO}_2 + \text{O}_2$                     | $1.7\text{E-}12*\text{EXP}(-940./\text{temp})$                                                                   | Burkholder et al. (2015)  |
| G2105 | UpStTrG  | $\text{OH} + \text{H}_2 \rightarrow \text{H}_2\text{O} + \text{H}$                | $2.8\text{E-}12*\text{EXP}(-1800./\text{temp})$                                                                  | Burkholder et al. (2015)  |
| G2107 | UpStTrG  | $\text{HO}_2 + \text{O}_3 \rightarrow \text{OH} + 2 \text{O}_2$                   | $1.\text{E-}14*\text{EXP}(-490./\text{temp})$                                                                    | Burkholder et al. (2015)  |
| G2109 | UpStTrG  | $\text{HO}_2 + \text{OH} \rightarrow \text{H}_2\text{O} + \text{O}_2$             | $4.8\text{E-}11*\text{EXP}(250./\text{temp})$                                                                    | Burkholder et al. (2015)  |
| G2110 | UpStTrG  | $\text{HO}_2 + \text{HO}_2 \rightarrow \text{H}_2\text{O}_2 + \text{O}_2$         | $\text{k\_HO2\_HO2}$                                                                                             | Burkholder et al. (2015)* |
| G2111 | UpStTrG  | $\text{H}_2\text{O} + \text{O}(^1\text{D}) \rightarrow 2 \text{OH}$               | $1.63\text{E-}10*\text{EXP}(60./\text{temp})$                                                                    | Burkholder et al. (2015)  |
| G2112 | UpStTrG  | $\text{H}_2\text{O}_2 + \text{OH} \rightarrow \text{H}_2\text{O} + \text{HO}_2$   | $1.8\text{E-}12$                                                                                                 | Burkholder et al. (2015)  |
| G2117 | UpStTrG  | $\text{H}_2\text{O} + \text{H}_2\text{O} \rightarrow (\text{H}_2\text{O})_2$      | $6.521\text{E-}26*\text{temp}*\text{EXP}(1851.09/\text{temp})$<br>* $\text{EXP}(-5.10485\text{E-}3*\text{temp})$ | Scribano et al. (2006)*   |
| G2118 | UpStTrG  | $(\text{H}_2\text{O})_2 \rightarrow \text{H}_2\text{O} + \text{H}_2\text{O}$      | $1.\text{E0}$                                                                                                    | see note*                 |
| G3101 | UpStTrGN | $\text{N}_2 + \text{O}(^1\text{D}) \rightarrow \text{O}(^3\text{P}) + \text{N}_2$ | $2.15\text{E-}11*\text{EXP}(110./\text{temp})$                                                                   | Burkholder et al. (2015)  |
| G3103 | UpStTrGN | $\text{NO} + \text{O}_3 \rightarrow \text{NO}_2 + \text{O}_2$                     | $3.0\text{E-}12*\text{EXP}(-1500./\text{temp})$                                                                  | Burkholder et al. (2015)  |
| G3106 | StTrGN   | $\text{NO}_2 + \text{O}_3 \rightarrow \text{NO}_3 + \text{O}_2$                   | $1.2\text{E-}13*\text{EXP}(-2450./\text{temp})$                                                                  | Burkholder et al. (2015)  |
| G3108 | StTrGN   | $\text{NO}_3 + \text{NO} \rightarrow 2 \text{NO}_2$                               | $1.5\text{E-}11*\text{EXP}(170./\text{temp})$                                                                    | Burkholder et al. (2015)  |
| G3109 | UpStTrGN | $\text{NO}_3 + \text{NO}_2 \rightarrow \text{N}_2\text{O}_5$                      | $\text{k\_NO3\_NO2}$                                                                                             | Burkholder et al. (2015)* |
| G3110 | StTrGN   | $\text{N}_2\text{O}_5 \rightarrow \text{NO}_2 + \text{NO}_3$                      | $\text{k\_NO3\_NO2}/(5.8\text{E-}27*\text{EXP}(10840./$<br>$\text{temp}))$                                       | Burkholder et al. (2015)* |
| G3200 | TrGN     | $\text{NO} + \text{OH} \rightarrow \text{HONO}$                                   | $\text{k\_3rd}(\text{temp}, \text{cair}, 7.0\text{E-}31, 2.6,$<br>$3.6\text{E-}11, 0.1, 0.6)$                    | Burkholder et al. (2015)  |
| G3201 | UpStTrGN | $\text{NO} + \text{HO}_2 \rightarrow \text{NO}_2 + \text{OH}$                     | $3.3\text{E-}12*\text{EXP}(270./\text{temp})$                                                                    | Burkholder et al. (2015)  |
| G3202 | UpStTrGN | $\text{NO}_2 + \text{OH} \rightarrow \text{HNO}_3$                                | $\text{k\_3rd}(\text{temp}, \text{cair}, 1.8\text{E-}30, 3.0,$<br>$2.8\text{E-}11, 0., 0.6)$                     | Burkholder et al. (2015)  |
| G3203 | StTrGN   | $\text{NO}_2 + \text{HO}_2 \rightarrow \text{HNO}_4$                              | $\text{k\_NO2\_HO2}$                                                                                             | Burkholder et al. (2015)* |
| G3204 | TrGN     | $\text{NO}_3 + \text{HO}_2 \rightarrow \text{NO}_2 + \text{OH} + \text{O}_2$      | $3.5\text{E-}12$                                                                                                 | Burkholder et al. (2015)  |
| G3205 | TrGN     | $\text{HONO} + \text{OH} \rightarrow \text{NO}_2 + \text{H}_2\text{O}$            | $1.8\text{E-}11*\text{EXP}(-390./\text{temp})$                                                                   | Burkholder et al. (2015)  |
| G3206 | StTrGN   | $\text{HNO}_3 + \text{OH} \rightarrow \text{H}_2\text{O} + \text{NO}_3$           | $\text{k\_HNO3\_OH}$                                                                                             | Burkholder et al. (2015)* |
| G3207 | StTrGN   | $\text{HNO}_4 \rightarrow \text{NO}_2 + \text{HO}_2$                              | $\text{k\_NO2\_HO2}/(2.1\text{E-}27*\text{EXP}(10900./$<br>$\text{temp}))$                                       | Burkholder et al. (2015)* |
| G3208 | StTrGN   | $\text{HNO}_4 + \text{OH} \rightarrow \text{NO}_2 + \text{H}_2\text{O}$           | $1.3\text{E-}12*\text{EXP}(380./\text{temp})$                                                                    | Burkholder et al. (2015)  |

Table 1: Gas phase reactions (... continued)

| #      | labels | reaction                                                                                                                        | rate coefficient                                                                                             | reference                                                                      |
|--------|--------|---------------------------------------------------------------------------------------------------------------------------------|--------------------------------------------------------------------------------------------------------------|--------------------------------------------------------------------------------|
| G3209  | TrGN   | $\text{NH}_3 + \text{OH} \rightarrow \text{NH}_2 + \text{H}_2\text{O}$                                                          | $1.7\text{E}-12 \cdot \text{EXP}(-710./\text{temp})$                                                         | Kohlmann and Poppe (1999)                                                      |
| G3210  | TrGN   | $\text{NH}_2 + \text{O}_3 \rightarrow \text{NH}_2\text{O} + \text{O}_2$                                                         | $4.3\text{E}-12 \cdot \text{EXP}(-930./\text{temp})$                                                         | Kohlmann and Poppe (1999)                                                      |
| G3211  | TrGN   | $\text{NH}_2 + \text{HO}_2 \rightarrow \text{NH}_2\text{O} + \text{OH}$                                                         | $4.8\text{E}-07 \cdot \text{EXP}(-628./\text{temp})$<br>$\cdot \text{temp}^{**}(-1.32)$                      | Kohlmann and Poppe (1999)                                                      |
| G3212  | TrGN   | $\text{NH}_2 + \text{HO}_2 \rightarrow \text{HNO} + \text{H}_2\text{O}$                                                         | $9.4\text{E}-09 \cdot \text{EXP}(-356./\text{temp})$<br>$\cdot \text{temp}^{**}(-1.12)$                      | Kohlmann and Poppe (1999)                                                      |
| G3213  | TrGN   | $\text{NH}_2 + \text{NO} \rightarrow \text{HO}_2 + \text{OH} + \text{N}_2$                                                      | $1.92\text{E}-12 \cdot ((\text{temp}/298.)^{**}(-1.5))$                                                      | Kohlmann and Poppe (1999)                                                      |
| G3214  | TrGN   | $\text{NH}_2 + \text{NO} \rightarrow \text{N}_2 + \text{H}_2\text{O}$                                                           | $1.41\text{E}-11 \cdot ((\text{temp}/298.)^{**}(-1.5))$                                                      | Kohlmann and Poppe (1999)                                                      |
| G3215  | TrGN   | $\text{NH}_2 + \text{NO}_2 \rightarrow \text{N}_2\text{O} + \text{H}_2\text{O}$                                                 | $1.2\text{E}-11 \cdot ((\text{temp}/298.)^{**}(-2.0))$                                                       | Kohlmann and Poppe (1999)                                                      |
| G3216  | TrGN   | $\text{NH}_2 + \text{NO}_2 \rightarrow \text{NH}_2\text{O} + \text{NO}$                                                         | $0.8\text{E}-11 \cdot ((\text{temp}/298.)^{**}(-2.0))$                                                       | Kohlmann and Poppe (1999)                                                      |
| G3217  | TrGN   | $\text{NH}_2\text{O} + \text{O}_3 \rightarrow \text{NH}_2 + \text{O}_2$                                                         | $1.2\text{E}-14$                                                                                             | Kohlmann and Poppe (1999)                                                      |
| G3218  | TrGN   | $\text{NH}_2\text{O} \rightarrow \text{NHOH}$                                                                                   | $1.3\text{E}3$                                                                                               | Kohlmann and Poppe (1999)                                                      |
| G3219  | TrGN   | $\text{HNO} + \text{OH} \rightarrow \text{NO} + \text{H}_2\text{O}$                                                             | $8.0\text{E}-11 \cdot \text{EXP}(-500./\text{temp})$                                                         | Kohlmann and Poppe (1999)                                                      |
| G3220  | TrGN   | $\text{HNO} + \text{NHOH} \rightarrow \text{NH}_2\text{OH} + \text{NO}$                                                         | $1.66\text{E}-12 \cdot \text{EXP}(-1500./\text{temp})$                                                       | Kohlmann and Poppe (1999)                                                      |
| G3221  | TrGN   | $\text{HNO} + \text{NO}_2 \rightarrow \text{HONO} + \text{NO}$                                                                  | $1.0\text{E}-12 \cdot \text{EXP}(-1000./\text{temp})$                                                        | Kohlmann and Poppe (1999)                                                      |
| G3222  | TrGN   | $\text{NHOH} + \text{OH} \rightarrow \text{HNO} + \text{H}_2\text{O}$                                                           | $1.66\text{E}-12$                                                                                            | Kohlmann and Poppe (1999)                                                      |
| G3223  | TrGN   | $\text{NH}_2\text{OH} + \text{OH} \rightarrow \text{NHOH} + \text{H}_2\text{O}$                                                 | $4.13\text{E}-11 \cdot \text{EXP}(-2138./\text{temp})$                                                       | Kohlmann and Poppe (1999)                                                      |
| G3224  | TrGN   | $\text{HNO} + \text{O}_2 \rightarrow \text{HO}_2 + \text{NO}$                                                                   | $3.65\text{E}-14 \cdot \text{EXP}(-4600./\text{temp})$                                                       | Kohlmann and Poppe (1999)                                                      |
| G4101  | StTrG  | $\text{CH}_4 + \text{OH} \rightarrow \text{CH}_3 + \text{H}_2\text{O}$                                                          | $1.85\text{E}-20 \cdot \text{EXP}(2.82 \cdot \text{LOG}(\text{temp})$<br>$-987./\text{temp})$                | Atkinson (2003)                                                                |
| G4102  | TrG    | $\text{CH}_3\text{OH} + \text{OH} \rightarrow .85 \text{HCHO} + .85 \text{HO}_2 + .15 \text{CH}_3\text{O} + \text{H}_2\text{O}$ | $6.38\text{E}-18 \cdot (\text{temp}^{**}2) \cdot \text{EXP}(144./\text{temp})$                               | Atkinson et al. (2006)                                                         |
| G4103a | StTrG  | $\text{CH}_3\text{O}_2 + \text{HO}_2 \rightarrow \text{CH}_3\text{OOH} + \text{O}_2$                                            | $3.8\text{E}-13 \cdot \text{EXP}(780./\text{temp}) / (1.+1./$<br>$498. \cdot \text{EXP}(1160./\text{temp}))$ | Atkinson et al. (2006)                                                         |
| G4103b | StTrG  | $\text{CH}_3\text{O}_2 + \text{HO}_2 \rightarrow \text{HCHO} + \text{H}_2\text{O} + \text{O}_2$                                 | $3.8\text{E}-13 \cdot \text{EXP}(780./\text{temp}) / (1.+$<br>$498. \cdot \text{EXP}(-1160./\text{temp}))$   | Atkinson et al. (2006)                                                         |
| G4104a | StTrGN | $\text{CH}_3\text{O}_2 + \text{NO} \rightarrow \text{CH}_3\text{O} + \text{NO}_2$                                               | $2.3\text{E}-12 \cdot \text{EXP}(360./\text{temp}) \cdot (1.-\text{beta}_$<br>$\text{CH3NO3})$               | Atkinson et al. (2006),<br>Butkovskaya et al. (2012),<br>Flocke et al. (1998)  |
| G4104b | StTrGN | $\text{CH}_3\text{O}_2 + \text{NO} \rightarrow \text{CH}_3\text{ONO}_2$                                                         | $2.3\text{E}-12 \cdot \text{EXP}(360./\text{temp}) \cdot \text{beta}_$<br>$\text{CH3NO3}$                    | Atkinson et al. (2006),<br>Butkovskaya et al. (2012),<br>Flocke et al. (1998)* |
| G4105  | TrGN   | $\text{CH}_3\text{O}_2 + \text{NO}_3 \rightarrow \text{CH}_3\text{O} + \text{NO}_2 + \text{O}_2$                                | $1.2\text{E}-12$                                                                                             | Atkinson et al. (2006)                                                         |
| G4106a | StTrG  | $\text{CH}_3\text{O}_2 \rightarrow \text{CH}_3\text{O} + .5 \text{O}_2$                                                         | $7.4\text{E}-13 \cdot \text{EXP}(-520./\text{temp}) \cdot \text{R02} \cdot 2.$                               | Atkinson et al. (2006)                                                         |

Table 1: Gas phase reactions (... continued)

| #      | labels  | reaction                                                                                                                                                                      | rate coefficient                                                                                                                                             | reference                 |
|--------|---------|-------------------------------------------------------------------------------------------------------------------------------------------------------------------------------|--------------------------------------------------------------------------------------------------------------------------------------------------------------|---------------------------|
| G4106b | StTrG   | $\text{CH}_3\text{O}_2 \rightarrow .5 \text{HCHO} + .5 \text{CH}_3\text{OH} + .5 \text{O}_2$                                                                                  | $(\text{k\_CH302}-7.4\text{E}-13*\text{EXP}(-520./\text{temp}))$<br>$*\text{R02}*2.$                                                                         | Atkinson et al. (2006)    |
| G4107  | StTrG   | $\text{CH}_3\text{OOH} + \text{OH} \rightarrow .6 \text{CH}_3\text{O}_2 + .4 \text{HCHO} + .4 \text{OH} + \text{H}_2\text{O}$                                                 | $\text{k\_CH300H\_OH}$                                                                                                                                       | Wallington et al. (2017)  |
| G4108  | StTrG   | $\text{HCHO} + \text{OH} \rightarrow \text{CO} + \text{H}_2\text{O} + \text{HO}_2$                                                                                            | $9.52\text{E}-18*\text{EXP}(2.03*\text{LOG}(\text{temp})$<br>$+636./\text{temp})$                                                                            | Sivakumaran et al. (2003) |
| G4109  | TrGN    | $\text{HCHO} + \text{NO}_3 \rightarrow \text{HNO}_3 + \text{CO} + \text{HO}_2$                                                                                                | $3.4\text{E}-13*\text{EXP}(-1900./\text{temp})$                                                                                                              | Burkholder et al. (2015)* |
| G4110  | UpStTrG | $\text{CO} + \text{OH} \rightarrow \text{H} + \text{CO}_2$                                                                                                                    | $(1.57\text{E}-13+\text{cair}*3.54\text{E}-33)$                                                                                                              | McCabe et al. (2001)      |
| G4111  | TrG     | $\text{HCOOH} + \text{OH} \rightarrow \text{CO}_2 + \text{HO}_2 + \text{H}_2\text{O}$                                                                                         | $2.94\text{E}-14*\text{exp}(786./\text{temp})$<br>$+9.85\text{E}-13*\text{EXP}(-1036./\text{temp})$                                                          | Paulot et al. (2011)      |
| G4114  | StTrGN  | $\text{CH}_3\text{O}_2 + \text{NO}_2 \rightarrow \text{CH}_3\text{O}_2\text{NO}_2$                                                                                            | $\text{k\_NO2\_CH302}$                                                                                                                                       | Burkholder et al. (2015)  |
| G4115  | StTrGN  | $\text{CH}_3\text{O}_2\text{NO}_2 \rightarrow \text{CH}_3\text{O}_2 + \text{NO}_2$                                                                                            | $\text{k\_NO2\_CH302}/(9.5\text{E}-29*\text{EXP}(11234./$<br>$\text{temp}))$                                                                                 | Burkholder et al. (2015)* |
| G4116  | StTrGN  | $\text{CH}_3\text{O}_2\text{NO}_2 + \text{OH} \rightarrow \text{HCHO} + \text{NO}_3 + \text{H}_2\text{O}$                                                                     | $3.00\text{E}-14$                                                                                                                                            | see note*                 |
| G4117  | StTrGN  | $\text{CH}_3\text{ONO}_2 + \text{OH} \rightarrow \text{H}_2\text{O} + \text{HCHO} + \text{NO}_2$                                                                              | $4.0\text{E}-13*\text{EXP}(-845./\text{temp})$                                                                                                               | Atkinson et al. (2006)    |
| G4118  | StTrG   | $\text{CH}_3\text{O} \rightarrow \text{HO}_2 + \text{HCHO}$                                                                                                                   | $1.3\text{E}-14*\text{exp}(-663./\text{temp})*\text{c}(\text{ind\_02})$                                                                                      | Chai et al. (2014)        |
| G4119a | StTrGN  | $\text{CH}_3\text{O} + \text{NO}_2 \rightarrow \text{CH}_3\text{ONO}_2$                                                                                                       | $\text{k\_3rd\_iupac}(\text{temp}, \text{cair}, 8.1\text{E}-29,$<br>$4.5, 2.1\text{E}-11, 0., 0.44)$                                                         | Atkinson et al. (2006)    |
| G4119b | StTrGN  | $\text{CH}_3\text{O} + \text{NO}_2 \rightarrow \text{HCHO} + \text{HONO}$                                                                                                     | $9.6\text{E}-12*\text{EXP}(-1150./\text{temp})$                                                                                                              | Atkinson et al. (2006)    |
| G4120a | StTrGN  | $\text{CH}_3\text{O} + \text{NO} \rightarrow \text{CH}_3\text{ONO}$                                                                                                           | $\text{k\_3rd\_iupac}(\text{temp}, \text{cair}, 2.6\text{E}-29,$<br>$2.8, 3.3\text{E}-11, 0.6, \text{REAL}(\text{EXP}(-\text{temp}/$<br>$900.), \text{SP}))$ | Atkinson et al. (2006)    |
| G4120b | StTrGN  | $\text{CH}_3\text{O} + \text{NO} \rightarrow \text{HCHO} + \text{HNO}$                                                                                                        | $2.3\text{E}-12*(\text{temp}/300.)*0.7$                                                                                                                      | Atkinson et al. (2006)    |
| G4121  | StTrG   | $\text{CH}_3\text{O}_2 + \text{O}_3 \rightarrow \text{CH}_3\text{O} + 2 \text{O}_2$                                                                                           | $2.9\text{E}-16*\text{exp}(-1000./\text{temp})$                                                                                                              | Burkholder et al. (2015)  |
| G4122  | StTrGN  | $\text{CH}_3\text{ONO} + \text{OH} \rightarrow \text{H}_2\text{O} + \text{HCHO} + \text{NO}$                                                                                  | $1.\text{E}-10*\text{exp}(-1764./\text{temp})$                                                                                                               | Nielsen et al. (1991)     |
| G4123  | StTrG   | $\text{HCHO} + \text{HO}_2 \rightarrow \text{HOCH}_2\text{O}_2$                                                                                                               | $9.7\text{E}-15*\text{EXP}(625./\text{temp})$                                                                                                                | Atkinson et al. (2006)    |
| G4124  | StTrG   | $\text{HOCH}_2\text{O}_2 \rightarrow \text{HCHO} + \text{HO}_2$                                                                                                               | $2.4\text{E}12*\text{EXP}(-7000./\text{temp})$                                                                                                               | Atkinson et al. (2006)    |
| G4125  | StTrG   | $\text{HOCH}_2\text{O}_2 + \text{HO}_2 \rightarrow .5 \text{HOCH}_2\text{OOH} + .5 \text{HCOOH} + .2$<br>$\text{OH} + .2 \text{HO}_2 + .3 \text{H}_2\text{O} + .8 \text{O}_2$ | $5.6\text{E}-15*\text{EXP}(2300./\text{temp})$                                                                                                               | Atkinson et al. (2006)    |
| G4126  | StTrGN  | $\text{HOCH}_2\text{O}_2 + \text{NO} \rightarrow \text{NO}_2 + \text{HO}_2 + \text{HCOOH}$                                                                                    | $0.7275*2.3\text{E}-12*\text{EXP}(360./\text{temp})$                                                                                                         | Atkinson et al. (2006)*   |
| G4127  | StTrGN  | $\text{HOCH}_2\text{O}_2 + \text{NO}_3 \rightarrow \text{NO}_2 + \text{HO}_2 + \text{HCOOH}$                                                                                  | $1.2\text{E}-12$                                                                                                                                             | see note*                 |
| G4129a | StTrG   | $\text{HOCH}_2\text{O}_2 \rightarrow \text{HCOOH} + \text{HO}_2$                                                                                                              | $(\text{k\_CH302}*5.5\text{E}-12)**0.5*\text{R02}*2.$                                                                                                        | Atkinson et al. (2006)    |
| G4129b | StTrG   | $\text{HOCH}_2\text{O}_2 \rightarrow .5 \text{HCOOH} + .5 \text{HOCH}_2\text{OH} + .5 \text{O}_2$                                                                             | $(\text{k\_CH302}*5.7\text{E}-14*\text{EXP}(750./\text{temp}))$<br>$**0.5*\text{R02}*2.$                                                                     | Atkinson et al. (2006)    |
| G4130a | StTrG   | $\text{HOCH}_2\text{OOH} + \text{OH} \rightarrow \text{HOCH}_2\text{O}_2 + \text{H}_2\text{O}$                                                                                | $0.6*\text{k\_CH300H\_OH}$                                                                                                                                   | Taraborrelli (2010)*      |
| G4130b | StTrG   | $\text{HOCH}_2\text{OOH} + \text{OH} \rightarrow \text{HCOOH} + \text{H}_2\text{O} + \text{OH}$                                                                               | $\text{k\_rohro} + \text{k\_s*f\_sooh}*f\_soh$                                                                                                               | Taraborrelli (2010)*      |

Table 1: Gas phase reactions (... continued)

| #     | labels | reaction                                                                                                                                                 | rate coefficient                                                                                 | reference                                       |
|-------|--------|----------------------------------------------------------------------------------------------------------------------------------------------------------|--------------------------------------------------------------------------------------------------|-------------------------------------------------|
| G4132 | StTrG  | $\text{HOCH}_2\text{OH} + \text{OH} \rightarrow \text{HO}_2 + \text{HCOOH} + \text{H}_2\text{O}$                                                         | $\text{k\_rohro} + 2.*\text{k\_s*f\_soh*f\_soh}$                                                 | Taraborrelli (2010)*                            |
| G4133 | StTrG  | $\text{CH}_3\text{O}_2 + \text{OH} \rightarrow \text{CH}_3\text{O} + \text{HO}_2$                                                                        | 1.4E-10                                                                                          | Bossolasco et al. (2014)*                       |
| G4134 | StTrG  | $\text{CH}_2\text{OO} \rightarrow \text{CO} + \text{HO}_2 + \text{OH}$                                                                                   | $1.124\text{E}+14*\text{EXP}(-10000/\text{temp})$                                                | see note*                                       |
| G4135 | StTrG  | $\text{CH}_2\text{OO} + \text{H}_2\text{O} \rightarrow \text{HOCH}_2\text{OOH}$                                                                          | $\text{k\_CH200\_N02}*3.6\text{E}-6$                                                             | Ouyang et al. (2013)*                           |
| G4136 | StTrG  | $\text{CH}_2\text{OO} + (\text{H}_2\text{O})_2 \rightarrow \text{HOCH}_2\text{OOH} + \text{H}_2\text{O}$                                                 | 5.2E-12                                                                                          | Chao et al. (2015), Lewis et al. (2015)*        |
| G4137 | StTrGN | $\text{CH}_2\text{OO} + \text{NO} \rightarrow \text{HCHO} + \text{NO}_2$                                                                                 | 6.E-14                                                                                           | Welz et al. (2012)*                             |
| G4138 | StTrGN | $\text{CH}_2\text{OO} + \text{NO}_2 \rightarrow \text{HCHO} + \text{NO}_3$                                                                               | $\text{k\_CH200\_N02}$                                                                           | Welz et al. (2012), Stone et al. (2014)*        |
| G4140 | StTrG  | $\text{CH}_2\text{OO} + \text{CO} \rightarrow \text{HCHO} + \text{CO}_2$                                                                                 | 3.6E-14                                                                                          | Vereecken et al. (2012)                         |
| G4141 | StTrG  | $\text{CH}_2\text{OO} + \text{HCOOH} \rightarrow 2 \text{HCOOH}$                                                                                         | 1.E-10                                                                                           | Welz et al. (2014)*                             |
| G4142 | StTrG  | $\text{CH}_2\text{OO} + \text{HCHO} \rightarrow 2 \text{LCARBON}$                                                                                        | 1.7E-12                                                                                          | Stone et al. (2014)*                            |
| G4143 | StTrG  | $\text{CH}_2\text{OO} + \text{CH}_3\text{OH} \rightarrow 2 \text{LCARBON}$                                                                               | 5.E-12                                                                                           | Vereecken et al. (2012)*                        |
| G4144 | StTrG  | $\text{CH}_2\text{OO} + \text{CH}_3\text{O}_2 \rightarrow 2 \text{LCARBON}$                                                                              | 5.E-12                                                                                           | Vereecken et al. (2012)*                        |
| G4145 | StTrG  | $\text{CH}_2\text{OO} + \text{HO}_2 \rightarrow \text{LCARBON}$                                                                                          | 5.E-12                                                                                           | Vereecken et al. (2012)                         |
| G4146 | StTrG  | $\text{CH}_2\text{OO} + \text{O}_3 \rightarrow \text{HCHO} + 2 \text{O}_2$                                                                               | 1.E-12                                                                                           | Vereecken et al. (2014)                         |
| G4147 | StTrG  | $\text{CH}_2\text{OO} + \text{CH}_2\text{OO} \rightarrow 2 \text{HCHO} + \text{O}_2$                                                                     | 6.E-11                                                                                           | Buras et al. (2014)                             |
| G4148 | StTrGN | $\text{HOCH}_2\text{O}_2 + \text{NO}_2 \rightarrow \text{HOCH}_2\text{O}_2\text{NO}_2$                                                                   | $\text{k\_NO2\_CH302}$                                                                           | see note*                                       |
| G4149 | StTrGN | $\text{HOCH}_2\text{O}_2\text{NO}_2 \rightarrow \text{HOCH}_2\text{O}_2 + \text{NO}_2$                                                                   | $\text{k\_NO2\_CH302}/(9.5\text{E}-29*\text{EXP}(11234./\text{temp}))$                           | Barnes et al. (1985)*                           |
| G4150 | StTrGN | $\text{HOCH}_2\text{O}_2\text{NO}_2 + \text{OH} \rightarrow \text{HCOOH} + \text{NO}_3 + \text{H}_2\text{O}$                                             | $9.50\text{E}-13*\text{EXP}(-650./\text{temp})*\text{f\_soh}$                                    | see note*                                       |
| G4151 | StTrG  | $\text{CH}_3 + \text{O}_2 \rightarrow \text{CH}_3\text{O}_2$                                                                                             | $\text{k\_3rd\_iupac}(\text{temp}, \text{cair}, 7.0\text{E}-31, 3., 1.8\text{E}-12, -1.1, 0.33)$ | Atkinson et al. (2006)                          |
| G4152 | StTrG  | $\text{CH}_3 + \text{O}_3 \rightarrow .956 \text{HCHO} + .956 \text{H} + .044 \text{CH}_3\text{O} + \text{O}_2$                                          | $5.1\text{E}-12*\text{exp}(-210./\text{temp})$                                                   | Albaladejo et al. (2002), Ogryzlo et al. (1981) |
| G4153 | StTrG  | $\text{CH}_3 + \text{O}(^3\text{P}) \rightarrow .83 \text{HCHO} + .83 \text{H} + .17 \text{CO} + .17 \text{H}_2 + .17 \text{H}$                          | 1.3E-10                                                                                          | Atkinson et al. (2006)                          |
| G4154 | StTrG  | $\text{CH}_3\text{O} + \text{O}_3 \rightarrow \text{CH}_3\text{O}_2 + \text{O}_2$                                                                        | 2.53E-14                                                                                         | Albaladejo et al. (2002)*                       |
| G4155 | StTrG  | $\text{CH}_3\text{O} + \text{O}(^3\text{P}) \rightarrow .75 \text{CH}_3 + .75 \text{O}_2 + .25 \text{HCHO} + .25 \text{OH}$                              | 2.5E-11                                                                                          | Baulch et al. (2005)                            |
| G4156 | StTrG  | $\text{CH}_3\text{O}_2 + \text{O}(^3\text{P}) \rightarrow \text{CH}_3\text{O} + \text{O}_2$                                                              | 4.3E-11                                                                                          | Zellner et al. (1988)                           |
| G4157 | StTrG  | $\text{HCHO} + \text{O}(^3\text{P}) \rightarrow .7 \text{OH} + .7 \text{CO} + .3 \text{H} + .3 \text{CO}_2 + \text{HO}_2$                                | $3.4\text{E}-11*\text{EXP}(-1600./\text{temp})$                                                  | Burkholder et al. (2015)                        |
| G4158 | TrG    | $\text{CH}_2\text{OO}^* \rightarrow .37 \text{CH}_2\text{OO} + .47 \text{CO} + .47 \text{H}_2\text{O} + .16 \text{HO}_2 + .16 \text{CO} + .16 \text{OH}$ | KDEC                                                                                             | Atkinson et al. (2006)                          |

Table 1: Gas phase reactions (... continued)

| #      | labels     | reaction                                                                                                                         | rate coefficient                                                                                                                                     | reference                 |
|--------|------------|----------------------------------------------------------------------------------------------------------------------------------|------------------------------------------------------------------------------------------------------------------------------------------------------|---------------------------|
| G4159  | TrGN       | $\text{HCN} + \text{OH} \rightarrow \text{H}_2\text{O} + \text{CN}$                                                              | $k_{\text{3rd}}(\text{temp}, \text{cair}, 4.28\text{E-}33, 1.0, \text{REAL}(4.25\text{E-}13 * \text{EXP}(-1150./\text{temp}), \text{SP}), 1.0, 0.8)$ | Kleinböhl et al. (2006)   |
| G4160a | TrGN       | $\text{HCN} + \text{O}(^1\text{D}) \rightarrow \text{O}(^3\text{P}) + \text{HCN}$                                                | $1.08\text{E-}10 * \text{EXP}(105./\text{temp}) * 0.15 * \text{EXP}(200/\text{temp})$                                                                | Strekowski et al. (2010)  |
| G4160b | TrGN       | $\text{HCN} + \text{O}(^1\text{D}) \rightarrow \text{H} + \text{NCO}$                                                            | $1.08\text{E-}10 * \text{EXP}(105./\text{temp}) * 0.68/2.$                                                                                           | Strekowski et al. (2010)* |
| G4160c | TrGN       | $\text{HCN} + \text{O}(^1\text{D}) \rightarrow \text{OH} + \text{CN}$                                                            | $1.08\text{E-}10 * \text{EXP}(105./\text{temp}) * (1. - (0.68/2. + 0.15 * \text{EXP}(200/\text{temp})))$                                             | Strekowski et al. (2010)* |
| G4161  | TrGN       | $\text{HCN} + \text{O}(^3\text{P}) \rightarrow \text{H} + \text{NCO}$                                                            | $1.0\text{E-}11 * \text{EXP}(-4000./\text{temp})$                                                                                                    | Burkholder et al. (2015)* |
| G4162  | TrGN       | $\text{CN} + \text{O}_2 \rightarrow \text{NCO} + \text{O}(^3\text{P})$                                                           | $1.2\text{E-}11 * \text{EXP}(210./\text{temp}) * 0.75$                                                                                               | Baulch et al. (2005)      |
| G4163  | TrGN       | $\text{CN} + \text{O}_2 \rightarrow \text{CO} + \text{NO}$                                                                       | $1.2\text{E-}11 * \text{EXP}(210./\text{temp}) * 0.25$                                                                                               | Baulch et al. (2005)      |
| G4164  | TrGN       | $\text{NCO} + \text{O}_2 \rightarrow \text{CO}_2 + \text{NO}$                                                                    | $7.\text{E-}15$                                                                                                                                      | Becker et al. (2000)*     |
| G6100  | UpStTrGCl  | $\text{Cl} + \text{O}_3 \rightarrow \text{ClO} + \text{O}_2$                                                                     | $2.8\text{E-}11 * \text{EXP}(-250./\text{temp})$                                                                                                     | Atkinson et al. (2007)    |
| G6102a | StTrGCl    | $\text{ClO} + \text{ClO} \rightarrow \text{Cl}_2 + \text{O}_2$                                                                   | $1.0\text{E-}12 * \text{EXP}(-1590./\text{temp})$                                                                                                    | Atkinson et al. (2007)    |
| G6102b | StTrGCl    | $\text{ClO} + \text{ClO} \rightarrow 2 \text{Cl} + \text{O}_2$                                                                   | $3.0\text{E-}11 * \text{EXP}(-2450./\text{temp})$                                                                                                    | Atkinson et al. (2007)    |
| G6102c | StTrGCl    | $\text{ClO} + \text{ClO} \rightarrow \text{Cl} + \text{OClO}$                                                                    | $3.5\text{E-}13 * \text{EXP}(-1370./\text{temp})$                                                                                                    | Atkinson et al. (2007)    |
| G6102d | StTrGCl    | $\text{ClO} + \text{ClO} \rightarrow \text{Cl}_2\text{O}_2$                                                                      | $k_{\text{ClO-ClO}}$                                                                                                                                 | Burkholder et al. (2015)  |
| G6103  | StTrGCl    | $\text{Cl}_2\text{O}_2 \rightarrow \text{ClO} + \text{ClO}$                                                                      | $k_{\text{ClO-ClO}} / (2.16\text{E-}27 * \text{EXP}(8537./\text{temp}))$                                                                             | Burkholder et al. (2015)* |
| G6202  | StTrGCl    | $\text{Cl} + \text{H}_2\text{O}_2 \rightarrow \text{HCl} + \text{HO}_2$                                                          | $1.1\text{E-}11 * \text{EXP}(-980./\text{temp})$                                                                                                     | Atkinson et al. (2007)    |
| G6204  | StTrGCl    | $\text{ClO} + \text{HO}_2 \rightarrow \text{HOCl} + \text{O}_2$                                                                  | $2.2\text{E-}12 * \text{EXP}(340./\text{temp})$                                                                                                      | Atkinson et al. (2007)*   |
| G6205  | StTrGCl    | $\text{HCl} + \text{OH} \rightarrow \text{Cl} + \text{H}_2\text{O}$                                                              | $1.7\text{E-}12 * \text{EXP}(-230./\text{temp})$                                                                                                     | Atkinson et al. (2007)    |
| G6300  | UpStTrGCIN | $\text{ClO} + \text{NO} \rightarrow \text{NO}_2 + \text{Cl}$                                                                     | $6.2\text{E-}12 * \text{EXP}(295./\text{temp})$                                                                                                      | Atkinson et al. (2007)    |
| G6301  | StTrGCIN   | $\text{ClO} + \text{NO}_2 \rightarrow \text{ClNO}_3$                                                                             | $k_{\text{3rd-iupac}}(\text{temp}, \text{cair}, 1.6\text{E-}31, 3.4, 7.\text{E-}11, 0., 0.4)$                                                        | Atkinson et al. (2007)    |
| G6302  | TrGCIN     | $\text{ClNO}_3 \rightarrow \text{ClO} + \text{NO}_2$                                                                             | $6.918\text{E-}7 * \text{EXP}(-10909./\text{temp}) * \text{cair}$                                                                                    | Anderson and Fahey (1990) |
| G6304  | StTrGCIN   | $\text{ClNO}_3 + \text{Cl} \rightarrow \text{Cl}_2 + \text{NO}_3$                                                                | $6.2\text{E-}12 * \text{EXP}(145./\text{temp})$                                                                                                      | Atkinson et al. (2007)    |
| G6400  | StTrGCl    | $\text{Cl} + \text{CH}_4 \rightarrow \text{HCl} + \text{CH}_3$                                                                   | $6.6\text{E-}12 * \text{EXP}(-1240./\text{temp})$                                                                                                    | Atkinson et al. (2006)    |
| G6401  | StTrGCl    | $\text{Cl} + \text{HCHO} \rightarrow \text{HCl} + \text{CO} + \text{HO}_2$                                                       | $8.1\text{E-}11 * \text{EXP}(-34./\text{temp})$                                                                                                      | Atkinson et al. (2006)    |
| G6402  | StTrGCl    | $\text{Cl} + \text{CH}_3\text{OOH} \rightarrow \text{HCHO} + \text{HCl} + \text{OH}$                                             | $5.9\text{E-}11$                                                                                                                                     | Atkinson et al. (2006)*   |
| G6403  | StTrGCl    | $\text{ClO} + \text{CH}_3\text{O}_2 \rightarrow \text{HO}_2 + \text{Cl} + \text{HCHO}$                                           | $1.8\text{E-}12 * \text{EXP}(-600./\text{temp})$                                                                                                     | Burkholder et al. (2015)  |
| G6413  | StTrGCIN   | $\text{Cl} + \text{CH}_3\text{ONO}_2 \rightarrow \text{HCl} + \text{HCHO} + \text{NO}_2$                                         | $1.3\text{E-}11 * \text{EXP}(-1200./\text{temp})$                                                                                                    | Burkholder et al. (2015)  |
| G6414  | StTrGCIN   | $\text{Cl} + \text{CH}_3\text{ONO} \rightarrow \text{HCl} + \text{HCHO} + \text{NO}$                                             | $2.1\text{E-}12$                                                                                                                                     | Sokolov et al. (1999)     |
| G6415  | StTrGCl    | $\text{Cl} + \text{CH}_3\text{O}_2 \rightarrow .5 \text{ClO} + .5 \text{CH}_3\text{O} + .5 \text{HCl} + .5 \text{CH}_2\text{OO}$ | $1.6\text{E-}10$                                                                                                                                     | Burkholder et al. (2015)  |
| G7100  | StTrGBr    | $\text{Br} + \text{O}_3 \rightarrow \text{BrO} + \text{O}_2$                                                                     | $1.7\text{E-}11 * \text{EXP}(-800./\text{temp})$                                                                                                     | Atkinson et al. (2007)    |

Table 1: Gas phase reactions (... continued)

| #      | labels    | reaction                                                                                                              | rate coefficient                                                                                                                       | reference                                              |
|--------|-----------|-----------------------------------------------------------------------------------------------------------------------|----------------------------------------------------------------------------------------------------------------------------------------|--------------------------------------------------------|
| G7102a | StTrGBr   | $\text{BrO} + \text{BrO} \rightarrow 2 \text{Br} + \text{O}_2$                                                        | 2.7E-12                                                                                                                                | Atkinson et al. (2007)                                 |
| G7102b | StTrGBr   | $\text{BrO} + \text{BrO} \rightarrow \text{Br}_2 + \text{O}_2$                                                        | $2.9\text{E-}14*\text{EXP}(840./\text{temp})$                                                                                          | Atkinson et al. (2007)                                 |
| G7200  | StTrGBr   | $\text{Br} + \text{HO}_2 \rightarrow \text{HBr} + \text{O}_2$                                                         | $7.7\text{E-}12*\text{EXP}(-450./\text{temp})$                                                                                         | Atkinson et al. (2007)                                 |
| G7201  | StTrGBr   | $\text{BrO} + \text{HO}_2 \rightarrow \text{HOBr} + \text{O}_2$                                                       | $4.5\text{E-}12*\text{EXP}(500./\text{temp})$                                                                                          | Atkinson et al. (2007)                                 |
| G7202  | StTrGBr   | $\text{HBr} + \text{OH} \rightarrow \text{Br} + \text{H}_2\text{O}$                                                   | $6.7\text{E-}12*\text{EXP}(155./\text{temp})$                                                                                          | Atkinson et al. (2007)                                 |
| G7204  | StTrGBr   | $\text{Br}_2 + \text{OH} \rightarrow \text{HOBr} + \text{Br}$                                                         | $2.0\text{E-}11*\text{EXP}(240./\text{temp})$                                                                                          | Atkinson et al. (2007)                                 |
| G7300  | TrGBrN    | $\text{Br} + \text{BrNO}_3 \rightarrow \text{Br}_2 + \text{NO}_3$                                                     | 4.9E-11                                                                                                                                | Orlando and Tyndall (1996)                             |
| G7301  | StTrGBrN  | $\text{BrO} + \text{NO} \rightarrow \text{Br} + \text{NO}_2$                                                          | $8.7\text{E-}12*\text{EXP}(260./\text{temp})$                                                                                          | Atkinson et al. (2007)                                 |
| G7302  | StTrGBrN  | $\text{BrO} + \text{NO}_2 \rightarrow \text{BrNO}_3$                                                                  | k_BrO_NO2                                                                                                                              | Atkinson et al. (2007)*                                |
| G7303  | TrGBrN    | $\text{BrNO}_3 \rightarrow \text{BrO} + \text{NO}_2$                                                                  | $\text{k\_BrO\_NO2}/(5.44\text{E-}9*\text{EXP}(14192./\text{temp})*1.\text{E6}*\text{R\_gas}*\text{temp}/(\text{atm2Pa}*\text{N\_A}))$ | Orlando and Tyndall (1996),<br>Atkinson et al. (2007)* |
| G7400  | StTrGBr   | $\text{Br} + \text{HCHO} \rightarrow \text{HBr} + \text{CO} + \text{HO}_2$                                            | $7.7\text{E-}12*\text{EXP}(-580./\text{temp})$                                                                                         | Atkinson et al. (2006)                                 |
| G7401  | TrGBr     | $\text{Br} + \text{CH}_3\text{OOH} \rightarrow \text{CH}_3\text{O}_2 + \text{HBr}$                                    | $2.6\text{E-}12*\text{EXP}(-1600./\text{temp})$                                                                                        | Kondo and Benson (1984)                                |
| G7402  | TrGBr     | $\text{BrO} + \text{CH}_3\text{O}_2 \rightarrow \text{HOBr} + \text{CH}_2\text{OO}$                                   | $2.42\text{E-}14*\text{EXP}(1617./\text{temp})$                                                                                        | Shallcross et al. (2015)                               |
| G7403  | StTrGBr   | $\text{CH}_3\text{Br} + \text{OH} \rightarrow \text{LCARBON} + \text{H}_2\text{O} + \text{Br}$                        | $1.42\text{E-}12*\text{EXP}(-1150./\text{temp})$                                                                                       | Burkholder et al. (2015)                               |
| G7407  | TrGBr     | $\text{CHBr}_3 + \text{OH} \rightarrow \text{LCARBON} + \text{H}_2\text{O} + 3 \text{Br}$                             | $9.0\text{E-}13*\text{EXP}(-360./\text{temp})$                                                                                         | Burkholder et al. (2015)*                              |
| G7408  | TrGBr     | $\text{CH}_2\text{Br}_2 + \text{OH} \rightarrow \text{LCARBON} + \text{H}_2\text{O} + 2 \text{Br}$                    | $2.0\text{E-}12*\text{EXP}(-840./\text{temp})$                                                                                         | Burkholder et al. (2015)*                              |
| G7600  | TrGBrCl   | $\text{Br} + \text{BrCl} \rightarrow \text{Br}_2 + \text{Cl}$                                                         | 3.32E-15                                                                                                                               | Manion et al. (2015)                                   |
| G7601  | TrGBrCl   | $\text{Br} + \text{Cl}_2 \rightarrow \text{BrCl} + \text{Cl}$                                                         | 1.10E-15                                                                                                                               | Dolson and Leone (1987)                                |
| G7602  | TrGBrCl   | $\text{Br}_2 + \text{Cl} \rightarrow \text{BrCl} + \text{Br}$                                                         | $2.3\text{E-}10*\text{EXP}(135./\text{temp})$                                                                                          | Bedjanian et al. (1998)                                |
| G7603a | StTrGBrCl | $\text{BrO} + \text{ClO} \rightarrow \text{Br} + \text{OClO}$                                                         | $1.6\text{E-}12*\text{EXP}(430./\text{temp})$                                                                                          | Atkinson et al. (2007)                                 |
| G7603b | StTrGBrCl | $\text{BrO} + \text{ClO} \rightarrow \text{Br} + \text{Cl} + \text{O}_2$                                              | $2.9\text{E-}12*\text{EXP}(220./\text{temp})$                                                                                          | Atkinson et al. (2007)                                 |
| G7603c | StTrGBrCl | $\text{BrO} + \text{ClO} \rightarrow \text{BrCl} + \text{O}_2$                                                        | $5.8\text{E-}13*\text{EXP}(170./\text{temp})$                                                                                          | Atkinson et al. (2007)                                 |
| G7604  | TrGBrCl   | $\text{BrCl} + \text{Cl} \rightarrow \text{Br} + \text{Cl}_2$                                                         | 1.45E-11                                                                                                                               | Clyne and Cruse (1972)                                 |
| G7605  | TrGBrCl   | $\text{CHCl}_2\text{Br} + \text{OH} \rightarrow \text{LCARBON} + 2 \text{LCHLORINE} + \text{H}_2\text{O} + \text{Br}$ | $2.0\text{E-}12*\text{EXP}(-840./\text{temp})$                                                                                         | see note*                                              |
| G7606  | TrGBrCl   | $\text{CHClBr}_2 + \text{OH} \rightarrow \text{LCARBON} + \text{LCHLORINE} + \text{H}_2\text{O} + 2 \text{Br}$        | $2.0\text{E-}12*\text{EXP}(-840./\text{temp})$                                                                                         | see note*                                              |
| G7607  | TrGBrCl   | $\text{CH}_2\text{ClBr} + \text{OH} \rightarrow \text{LCARBON} + \text{LCHLORINE} + \text{H}_2\text{O} + \text{Br}$   | $2.1\text{E-}12*\text{EXP}(-880./\text{temp})$                                                                                         | Burkholder et al. (2015)*                              |
| G8100  | TrGI      | $\text{I} + \text{O}_3 \rightarrow \text{IO} + \text{O}_2$                                                            | $2.1\text{E-}11*\text{EXP}(-830./\text{temp})$                                                                                         | Atkinson et al. (2007)                                 |
| G8102  | TrGI      | $\text{OIO} + \text{OIO} \rightarrow \text{I}(\text{part})$                                                           | 5.E-11                                                                                                                                 | von Glasow et al. (2002)*                              |
| G8103  | TrGI      | $\text{IO} + \text{IO} \rightarrow .38 \text{OIO} + 1.62 \text{I} + .62 \text{O}_2$                                   | $5.4\text{E-}11*\text{EXP}(180./\text{temp})$                                                                                          | Atkinson et al. (2007)*                                |
| G8200  | TrGI      | $\text{I} + \text{HO}_2 \rightarrow \text{HI} + \text{O}_2$                                                           | $1.5\text{E-}11*\text{EXP}(-1090./\text{temp})$                                                                                        | Atkinson et al. (2007)                                 |

Table 1: Gas phase reactions (... continued)

| #     | labels | reaction                                                                                                                 | rate coefficient                                                                                                                                               | reference                                                 |
|-------|--------|--------------------------------------------------------------------------------------------------------------------------|----------------------------------------------------------------------------------------------------------------------------------------------------------------|-----------------------------------------------------------|
| G8201 | TrGI   | $\text{IO} + \text{HO}_2 \rightarrow \text{HOI} + \text{O}_2$                                                            | $1.4\text{E-}11 \cdot \text{EXP}(540./\text{temp})$                                                                                                            | Atkinson et al. (2007)                                    |
| G8202 | TrGI   | $\text{HI} + \text{OH} \rightarrow \text{I} + \text{H}_2\text{O}$                                                        | $1.6\text{E-}11 \cdot \text{EXP}(440./\text{temp})$                                                                                                            | Atkinson et al. (2007)                                    |
| G8203 | TrGI   | $\text{OIO} + \text{OH} \rightarrow \text{HIO}_3$                                                                        | $2.2\text{E-}10 \cdot \text{EXP}(243./\text{temp})$                                                                                                            | Plane et al. (2006)                                       |
| G8204 | TrGI   | $\text{I}_2 + \text{OH} \rightarrow \text{HOI} + \text{I}$                                                               | $2.1\text{E-}10$                                                                                                                                               | Atkinson et al. (2007)                                    |
| G8300 | TrGIN  | $\text{I} + \text{NO}_2 \rightarrow \text{INO}_2$                                                                        | k_I_NO2                                                                                                                                                        | Atkinson et al. (2007)*                                   |
| G8301 | TrGIN  | $\text{I} + \text{NO}_3 \rightarrow \text{IO} + \text{NO}_2$                                                             | $1.\text{E-}10$                                                                                                                                                | Dillon et al. (2008)                                      |
| G8302 | TrGIN  | $\text{IO} + \text{NO} \rightarrow \text{I} + \text{NO}_2$                                                               | $7.15\text{E-}12 \cdot \text{EXP}(300./\text{temp})$                                                                                                           | Atkinson et al. (2007)                                    |
| G8303 | TrGIN  | $\text{IO} + \text{NO}_2 \rightarrow \text{INO}_3$                                                                       | k_3rd_iupac(temp, cair, $7.7\text{E-}31$ ,<br>5., $1.6\text{E-}11$ , 0., 0.4)                                                                                  | Atkinson et al. (2007)                                    |
| G8304 | TrGIN  | $\text{OIO} + \text{NO} \rightarrow \text{NO}_2 + \text{IO}$                                                             | $1.1\text{E-}12 \cdot \text{EXP}(542./\text{temp})$                                                                                                            | Atkinson et al. (2007)                                    |
| G8305 | TrGIN  | $\text{INO}_2 \rightarrow \text{I} + \text{NO}_2$                                                                        | k_I_NO2/( $3.7\text{E-}7 \cdot \text{EXP}(9568./\text{temp})$<br>$\cdot 1.\text{E6} \cdot \text{R\_gas} \cdot \text{temp}/(\text{atm2Pa} \cdot \text{N\_A})$ ) | van den Bergh and Troe (1976),<br>Atkinson et al. (2007)* |
| G8306 | TrGIN  | $\text{INO}_3 \rightarrow \text{IO} + \text{NO}_2$                                                                       | 0.                                                                                                                                                             | see note*                                                 |
| G8307 | TrGIN  | $\text{I}_2 + \text{NO}_3 \rightarrow \text{I} + \text{INO}_3$                                                           | $1.5\text{E-}12$                                                                                                                                               | Atkinson et al. (2007)                                    |
| G8308 | TrGIN  | $\text{IO} + \text{NO}_3 \rightarrow \text{OIO} + \text{NO}_2$                                                           | $9.\text{E-}12$                                                                                                                                                | Dillon et al. (2008)                                      |
| G8401 | TrGI   | $\text{CH}_3\text{O}_2 + \text{IO} \rightarrow .4 \text{ I} + .6 \text{ OIO} + \text{HCHO} + \text{HO}_2$                | $2.\text{E-}12$                                                                                                                                                | Dillon et al. (2006), Bale et al.<br>(2005)*              |
| G8402 | TrGIN  | $\text{CH}_3\text{I} + \text{NO}_3 \rightarrow \text{HNO}_3 + \text{HCHO} + \text{IO}$                                   | $3.4\text{E-}17$                                                                                                                                               | Wayne et al. (1991)*                                      |
| G8600 | TrGCH  | $\text{IO} + \text{ClO} \rightarrow .2 \text{ ICl} + .25 \text{ Cl} + .55 \text{ OClO} + .8 \text{ I} + .45 \text{ O}_2$ | $4.7\text{E-}12 \cdot \text{EXP}(280./\text{temp})$                                                                                                            | Atkinson et al. (2007)                                    |
| G8700 | TrGBrI | $\text{I} + \text{BrO} \rightarrow \text{IO} + \text{Br}$                                                                | $1.2\text{E-}11$                                                                                                                                               | Burkholder et al. (2015)                                  |
| G8701 | TrGBrI | $\text{IO} + \text{BrO} \rightarrow \text{Br} + .8 \text{ OIO} + .2 \text{ I} + .2 \text{ O}_2$                          | $1.5\text{E-}11 \cdot \text{EXP}(510./\text{temp})$                                                                                                            | Atkinson et al. (2007)*                                   |
| G9200 | StTrGS | $\text{SO}_2 + \text{OH} \rightarrow \text{H}_2\text{SO}_4 + \text{HO}_2$                                                | k_3rd(temp, cair, $3.3\text{E-}31$ , 4.3,<br>$1.6\text{E-}12$ , 0., 0.6)                                                                                       | Burkholder et al. (2015)                                  |
| G9403 | TrGS   | $\text{CH}_3\text{SO}_2 \rightarrow \text{SO}_2 + \text{CH}_3$                                                           | $1.8\text{E}13 \cdot \text{EXP}(-8661./\text{temp})$                                                                                                           | Barone et al. (1995)                                      |
| G9404 | TrGS   | $\text{CH}_3\text{SO}_2 + \text{O}_3 \rightarrow \text{CH}_3\text{SO}_3$                                                 | $3.\text{E-}13$                                                                                                                                                | Barone et al. (1995)                                      |
| G9405 | TrGS   | $\text{CH}_3\text{SO}_3 + \text{HO}_2 \rightarrow \text{CH}_3\text{SO}_3\text{H}$                                        | $5.\text{E-}11$                                                                                                                                                | Barone et al. (1995)                                      |
| G9408 | StTrGS | $\text{CH}_2\text{OO} + \text{SO}_2 \rightarrow \text{H}_2\text{SO}_4 + \text{HCHO}$                                     | k_CH200_S02                                                                                                                                                    | Welz et al. (2012), Stone et al.<br>(2014)*               |



## General notes

### Three-body reactions

Rate coefficients for three-body reactions are defined via the function `k_3rd`( $T$ ,  $M$ ,  $k_0^{300}$ ,  $n$ ,  $k_{\text{inf}}^{300}$ ,  $m$ ,  $f_c$ ). In the code, the temperature  $T$  is called `temp` and the concentration of “air molecules”  $M$  is called `cair`. Using the auxiliary variables  $k_0(T)$ ,  $k_{\text{inf}}(T)$ , and  $k_{\text{ratio}}$ , `k_3rd` is defined as:

$$k_0(T) = k_0^{300} \times \left(\frac{300\text{K}}{T}\right)^n \quad (1)$$

$$k_{\text{inf}}(T) = k_{\text{inf}}^{300} \times \left(\frac{300\text{K}}{T}\right)^m \quad (2)$$

$$k_{\text{ratio}} = \frac{k_0(T)M}{k_{\text{inf}}(T)} \quad (3)$$

$$\text{k\_3rd} = \frac{k_0(T)M}{1 + k_{\text{ratio}}} \times f_c^{\left(\frac{1}{1+(\log_{10}(k_{\text{ratio}}))^2}\right)} \quad (4)$$

A similar function, called `k_3rd_iupac` here, is used by Wallington et al. (2017) for three-body reactions. It has the same function parameters as `k_3rd` and it is defined as:

$$k_0(T) = k_0^{300} \times \left(\frac{300\text{K}}{T}\right)^n \quad (5)$$

$$k_{\text{inf}}(T) = k_{\text{inf}}^{300} \times \left(\frac{300\text{K}}{T}\right)^m \quad (6)$$

$$k_{\text{ratio}} = \frac{k_0(T)M}{k_{\text{inf}}(T)} \quad (7)$$

$$N = 0.75 - 1.27 \times \log_{10}(f_c) \quad (8)$$

$$\text{k\_3rd\_iupac} = \frac{k_0(T)M}{1 + k_{\text{ratio}}} \times f_c^{\left(\frac{1}{1+(\log_{10}(k_{\text{ratio}})/N)^2}\right)} \quad (9)$$

### RO<sub>2</sub> self and cross reactions

The self and cross reactions of organic peroxy radicals are treated according to the permutation reaction formalism as implemented in the MCM (Rickard and Pascoe, 2009), as described by Jenkin et al. (1997). Every organic peroxy radical reacts in a pseudo-first-order reaction with a rate constant that is expressed as  $k^{1\text{st}} = 2 \times \sqrt{k_{\text{self}} \times k_{\text{CH3O2}}} \times [\text{RO}_2]$  where  $k_{\text{self}}$  = second-order rate coefficient of the self reaction of the organic peroxy radical,  $k_{\text{CH3O2}}$  = second-order rate coefficient of the self reaction of  $\text{CH}_3\text{O}_2$ , and  $[\text{RO}_2]$  = sum of the concentrations of all organic peroxy radicals.

### Specific notes

G2110: The rate coefficient is: `k_HO2_HO2` =  $(3.0\text{E-}13 \times \text{EXP}(460./\text{temp}) + 2.1\text{E-}33 \times \text{EXP}(920./\text{temp}) \times \text{cair}) \times (1. + 1.4\text{E-}21 \times \text{EXP}(2200./\text{temp}) \times \text{C}(\text{ind\_H2O}))$ .

G2117: Converted to Kc [molec-1 cm3] =  $\text{Kp} \times \text{R} \times \text{T} / \text{NA}$ , where R is 82.05736 [cm3atmK1mol1].

G2118: Assuming fast equilibrium.

G3109: The rate coefficient is: `k_NO3_NO2` = `k_3rd(temp, cair, 2.4E-30, 3.0, 1.6E-12, -0.1, 0.6)`.

G3110: The rate coefficient is defined as backward reaction divided by equilibrium constant.

G3203: The rate coefficient is: `k_NO2_HO2` = `k_3rd(temp, cair, 1.9E-31, 3.4, 4.0E-12, 0.3, 0.6)`.

G3206: The rate coefficient is: `k_HNO3_OH` =  $2.4\text{E-}14 \times \text{EXP}(460./\text{temp}) + 1./ (1./ (6.5\text{E-}34 \times \text{EXP}(1335./\text{temp}) \times \text{cair}) + 1./ (2.7\text{E-}17 \times \text{EXP}(2199./\text{temp})) )$

G3207: The rate coefficient is defined as backward reaction divided by equilibrium constant.

G4104b: Methyl nitrate yield according to Banic et al. (2003) but reduced by a factor of 10 according to the upper limit derived from measurements by Munger et al. (1999).

G4109: Same temperature dependence as for  $\text{CH}_3\text{CHO} + \text{NO}_3$  assumed.

G4115: The rate coefficient is defined as backward reaction divided by equilibrium constant.

G4116: Same value as for PAN + OH.

G4126: Same as for G4104 but scaled to match the recommended value at 298K.

G4127: Same as for  $\text{CH}_3\text{O}_2 + \text{NO}_3$  in G4105.

G4130a: SAR for H-abstraction by OH.

G4130b: SAR for H-abstraction by OH.

G4132: SAR for H-abstraction by OH.

G4133: Lower limit of the rate constant. Products uncertain but  $\text{CH}_3\text{OH}$  can be excluded because of a likely high energy barrier (L. Vereecken, pers. comm.).  $\text{CH}_2\text{OO}$  production cannot be excluded.

G4134: Estimate based on the decomposition lifetime of 3 s (Olzmann et al., 1997) and a 20 kcal/mol energy barrier (Vereecken and Francisco, 2012).

G4135: Rate constant for  $\text{CH}_2\text{OO} + \text{NO}_2$  (G4138) multiplied by the factor from Ouyang et al. (2013).

G4136: Average of two measurements.

G4137: Upper limit.

G4138: Average of 7.E-12 and 1.5E-12.

G4141:  $\text{HOOCH}_2\text{OCHO}$  forms and then decomposes to formic anhydride (Gruzdev et al., 1993) which hydrolyses in the humid atmosphere (Conn et al., 1942).

G4142: High-pressure limit.

G4143: Generic estimate for reaction with alcohols.

G4144: Generic estimate for reaction with  $\text{RO}_2$ .

G4148: Same value as for  $\text{NO}_2 + \text{CH}_3\text{O}_2$ .

**G4149:** Barnes et al. (1985) estimated a decomposition rate equal to that of  $\text{CH}_3\text{O}_2\text{NO}_2$ .

**G4150:** Value for  $\text{CH}_3\text{O}_2\text{NO}_2 + \text{OH}$ , H-abstraction enhanced by the HO-group by  $f_{\text{soh}}$ .

**G4154:** Products assumed to be  $\text{CH}_3\text{O}_2 + \text{O}_2$  (could also be  $\text{HCHO} + \text{O}_2 + \text{OH}$ ).

**G4160b:** Half of the H-yield is attributed to fast secondary chemistry.

**G4160c:** The  $\text{NH} + \text{CO}$  channel is also significant but neglected here.

**G4161:** No studies below 450 K and only the major channel is considered.

**G4164:** Upper limit. Dominant pathway under atmospheric conditions.

**G6103:** The rate coefficient is defined as backward reaction divided by equilibrium constant.

**G6204:** At low temperatures, there may be a minor reaction channel leading to  $\text{O}_3 + \text{HCl}$ . See Finkbeiner et al. (1995) for details. It is neglected here.

**G6402:** The initial products are probably  $\text{HCl}$  and  $\text{CH}_2\text{OOH}$  (Atkinson et al., 2006). It is assumed that  $\text{CH}_2\text{OOH}$  dissociates into  $\text{HCHO}$  and  $\text{OH}$ .

**G7302:** The rate coefficient is:  $k_{\text{BrO}_2\text{NO}_2} = k_{3\text{rd}}(\text{temp}, \text{cair}, 5.2\text{E-}31, 3.2, 6.9\text{E-}12, 2.9, 0.6)$ .

**G7303:** The rate coefficient is defined as backward reaction (Atkinson et al., 2007) divided by equilibrium constant (Orlando and Tyndall, 1996).

**G7407:** It is assumed that the reaction liberates all Br atoms. The fate of the carbon atom is currently not considered.

**G7408:** It is assumed that the reaction liberates all Br atoms. The fate of the carbon atom is currently not considered.

**G7605:** Same value as for G7408:  $\text{CH}_2\text{Br}_2 + \text{OH}$  assumed. It is assumed that the reaction liberates all Br atoms but not Cl. The fate of the carbon atom is currently not considered.

**G7606:** Same value as for G7408:  $\text{CH}_2\text{Br}_2 + \text{OH}$  assumed. It is assumed that the reaction liberates all Br atoms but not Cl. The fate of the carbon atom is currently not considered.

**G7607:** It is assumed that the reaction liberates all Br atoms but not Cl. The fate of the carbon atom is currently not considered.

**G8102:** It is assumed that the reaction produces new particles

**G8103:** The yield of 38 % OIO is from Atkinson et al. (2007). It is assumed here that the remaining 62 % produce  $2 \text{I} + \text{O}_2$ .

**G8300:** The rate coefficient is:  $k_{\text{I}_2\text{NO}_2} = k_{3\text{rd\_iupac}}(\text{temp}, \text{cair}, 3\text{E-}31, 1., 6.6\text{E-}11, 0., 0.63)$ .

**G8305:** The rate coefficient is defined as backward reaction (Atkinson et al., 2007) divided by equilibrium constant (van den Bergh and Troe, 1976).

**G8306:** According to John Plane and John Crowley (pers. comm. 2007), the rate coefficient of  $1.1\text{E}15 * \text{EXP}(-12060./\text{temp})$  suggested by Atkinson et al. (2007) is wrong.

**G8401:** The rate coefficient is from Dillon et al. (2006), the yield of I atoms is a lower limit given on page 2170 of Bale et al. (2005).

**G8402:** The products are from Nakano et al. (2005).

**G8701:** 80% Br + OIO production is from Atkinson et al. (2007). The remaining channels are assumed to produce  $\text{Br} + \text{I} + \text{O}_2$ .

**G9408:** Average of  $3.9\text{E-}11$  and  $3.42\text{E-}11$ .

Table 2: Photolysis reactions

| #       | labels    | reaction                                                                                           | rate coefficient | reference             |
|---------|-----------|----------------------------------------------------------------------------------------------------|------------------|-----------------------|
| J1000a  | UpStTrGJ  | $O_2 + h\nu \rightarrow O(^3P) + O(^3P)$                                                           | jx(ip_02)        | Sander et al. (2014)  |
| J1001a  | UpStTrGJ  | $O_3 + h\nu \rightarrow O(^1D) + O_2$                                                              | jx(ip_01D)       | Sander et al. (2014)  |
| J1001b  | UpStTrGJ  | $O_3 + h\nu \rightarrow O(^3P) + O_2$                                                              | jx(ip_03P)       | Sander et al. (2014)  |
| J2101   | UpStTrGJ  | $H_2O_2 + h\nu \rightarrow 2 OH$                                                                   | jx(ip_H202)      | Sander et al. (2014)  |
| J3101   | UpStTrGJN | $NO_2 + h\nu \rightarrow NO + O(^3P)$                                                              | jx(ip_N02)       | Sander et al. (2014)  |
| J3103a  | UpStTrGJN | $NO_3 + h\nu \rightarrow NO_2 + O(^3P)$                                                            | jx(ip_N020)      | Sander et al. (2014)  |
| J3103b  | UpStTrGJN | $NO_3 + h\nu \rightarrow NO + O_2$                                                                 | jx(ip_N002)      | Sander et al. (2014)  |
| J3104   | StTrGJN   | $N_2O_5 + h\nu \rightarrow NO_2 + NO_3$                                                            | jx(ip_N205)      | Sander et al. (2014)  |
| J3200   | TrGJN     | $HONO + h\nu \rightarrow NO + OH$                                                                  | jx(ip_HONO)      | Sander et al. (2014)  |
| J3201   | StTrGJN   | $HNO_3 + h\nu \rightarrow NO_2 + OH$                                                               | jx(ip_HN03)      | Sander et al. (2014)  |
| J3202   | StTrGJN   | $HNO_4 + h\nu \rightarrow .667 NO_2 + .667 HO_2 + .333 NO_3 + .333 OH$                             | jx(ip_HN04)      | Sander et al. (2014)  |
| J41000  | StTrGJ    | $CH_3OOH + h\nu \rightarrow CH_3O + OH$                                                            | jx(ip_CH300H)    | Sander et al. (2014)  |
| J41001a | StTrGJ    | $HCHO + h\nu \rightarrow H_2 + CO$                                                                 | jx(ip_COH2)      | Sander et al. (2014)  |
| J41001b | StTrGJ    | $HCHO + h\nu \rightarrow H + CO + HO_2$                                                            | jx(ip_CHOH)      | Sander et al. (2014)  |
| J41004  | StTrGJN   | $CH_3ONO + h\nu \rightarrow CH_3O + NO$                                                            | jx(ip_CH30N0)    | Sander et al. (2014)  |
| J41005  | StTrGJN   | $CH_3ONO_2 + h\nu \rightarrow CH_3O + NO_2$                                                        | jx(ip_CH3N03)    | Sander et al. (2014)  |
| J41006  | StTrGJN   | $CH_3O_2NO_2 + h\nu \rightarrow .667 NO_2 + .667 CH_3O_2 + .333 NO_3 + .333 CH_3O$                 | jx(ip_CH302N02)  | Sander et al. (2014)* |
| J41007  | StTrGJ    | $HOCH_2OOH + h\nu \rightarrow HCOOH + OH + HO_2$                                                   | jx(ip_CH300H)    | Sander et al. (2014)  |
| J41008  | StTrGJ    | $CH_3O_2 + h\nu \rightarrow HCHO + OH$                                                             | jx(ip_CH302)     | Sander et al. (2014)  |
| J41009  | StTrGJ    | $HCOOH + h\nu \rightarrow CO + HO_2 + OH$                                                          | jx(ip_HCOOH)     | Sander et al. (2014)  |
| J41010  | StTrGJN   | $HOCH_2O_2NO_2 + h\nu \rightarrow .667 NO_2 + .667 HOCH_2O_2 + .333 NO_3 + .333 HCOOH + .333 HO_2$ | jx(ip_CH302N02)  | Sander et al. (2014)  |
| J6000   | StTrGJCl  | $Cl_2 + h\nu \rightarrow Cl + Cl$                                                                  | jx(ip_Cl2)       | Sander et al. (2014)  |
| J6100   | StTrGJCl  | $Cl_2O_2 + h\nu \rightarrow 2 Cl$                                                                  | jx(ip_Cl202)     | Sander et al. (2014)  |
| J6101   | StTrGJCl  | $OClo + h\nu \rightarrow ClO + O(^3P)$                                                             | jx(ip_OC10)      | Sander et al. (2014)  |
| J6201   | StTrGJCl  | $HOCl + h\nu \rightarrow OH + Cl$                                                                  | jx(ip_HOC1)      | Sander et al. (2014)  |
| J6300   | TrGJClN   | $ClNO_2 + h\nu \rightarrow Cl + NO_2$                                                              | jx(ip_ClN02)     | Sander et al. (2014)  |
| J6301a  | StTrGJClN | $ClNO_3 + h\nu \rightarrow Cl + NO_3$                                                              | jx(ip_ClN03)     | Sander et al. (2014)  |
| J6301b  | StTrGJClN | $ClNO_3 + h\nu \rightarrow ClO + NO_2$                                                             | jx(ip_ClON02)    | Sander et al. (2014)  |
| J7000   | StTrGJBr  | $Br_2 + h\nu \rightarrow Br + Br$                                                                  | jx(ip_Br2)       | Sander et al. (2014)  |
| J7100   | StTrGJBr  | $BrO + h\nu \rightarrow Br + O(^3P)$                                                               | jx(ip_Br0)       | Sander et al. (2014)  |
| J7200   | StTrGJBr  | $HOBr + h\nu \rightarrow Br + OH$                                                                  | jx(ip_HOBr)      | Sander et al. (2014)  |
| J7300   | TrGJBrN   | $BrNO_2 + h\nu \rightarrow Br + NO_2$                                                              | jx(ip_BrN02)     | Sander et al. (2014)  |

Table 2: Photolysis reactions (... continued)

| #     | labels     | reaction                                                                                                  | rate coefficient | reference             |
|-------|------------|-----------------------------------------------------------------------------------------------------------|------------------|-----------------------|
| J7301 | StTrGJBrN  | $\text{BrNO}_3 + h\nu \rightarrow .85 \text{ Br} + .85 \text{ NO}_3 + .15 \text{ BrO} + .15 \text{ NO}_2$ | jx(ip_BrNO3)     | Sander et al. (2014)* |
| J7401 | TrGJBr     | $\text{CH}_2\text{Br}_2 + h\nu \rightarrow \text{LCARBON} + 2 \text{ Br}$                                 | jx(ip_CH2Br2)    | Sander et al. (2014)  |
| J7402 | TrGJBr     | $\text{CHBr}_3 + h\nu \rightarrow \text{LCARBON} + 3 \text{ Br}$                                          | jx(ip_CHBr3)     | Sander et al. (2014)  |
| J7600 | StTrGJBrCl | $\text{BrCl} + h\nu \rightarrow \text{Br} + \text{Cl}$                                                    | jx(ip_BrCl)      | Sander et al. (2014)  |
| J7602 | TrGJBrCl   | $\text{CH}_2\text{ClBr} + h\nu \rightarrow \text{LCARBON} + \text{Br} + \text{Cl}$                        | jx(ip_CH2ClBr)   | Sander et al. (2014)  |
| J7603 | TrGJBrCl   | $\text{CHCl}_2\text{Br} + h\nu \rightarrow \text{LCARBON} + \text{Br} + 2 \text{ Cl}$                     | jx(ip_CHCl2Br)   | Sander et al. (2014)  |
| J7604 | TrGJBrCl   | $\text{CHClBr}_2 + h\nu \rightarrow \text{LCARBON} + 2 \text{ Br} + \text{Cl}$                            | jx(ip_CHClBr2)   | Sander et al. (2014)  |
| J8000 | TrGJI      | $\text{I}_2 + h\nu \rightarrow \text{I} + \text{I}$                                                       | jx(ip_I2)        | Sander et al. (2014)  |
| J8100 | TrGJI      | $\text{IO} + h\nu \rightarrow \text{I} + \text{O}(^3\text{P})$                                            | jx(ip_IO)        | Sander et al. (2014)  |
| J8200 | TrGJI      | $\text{HOI} + h\nu \rightarrow \text{I} + \text{OH}$                                                      | jx(ip_HOI)       | Sander et al. (2014)  |
| J8300 | TrGJIN     | $\text{INO}_2 + h\nu \rightarrow \text{I} + \text{NO}_2$                                                  | jx(ip_INO2)      | Sander et al. (2014)  |
| J8301 | TrGJIN     | $\text{INO}_3 + h\nu \rightarrow \text{I} + \text{NO}_3$                                                  | jx(ip_INO3)      | Sander et al. (2014)  |
| J8400 | TrGJI      | $\text{CH}_2\text{I}_2 + h\nu \rightarrow 2 \text{ I} + 2 \text{ HO}_2 + \text{CO}$                       | jx(ip_CH2I2)     | Sander et al. (2014)  |
| J8401 | TrGJI      | $\text{CH}_3\text{I} + h\nu \rightarrow \text{I} + \text{CH}_3$                                           | jx(ip_CH3I)      | Sander et al. (2014)  |
| J8403 | TrGJClI    | $\text{CH}_2\text{ClI} + h\nu \rightarrow \text{I} + \text{Cl} + 2 \text{ HO}_2 + \text{CO}$              | jx(ip_CH2ClI)    | Sander et al. (2014)  |
| J8600 | TrGJClI    | $\text{ICl} + h\nu \rightarrow \text{I} + \text{Cl}$                                                      | jx(ip_ICl)       | Sander et al. (2014)  |
| J8700 | TrGJBrI    | $\text{IBr} + h\nu \rightarrow \text{I} + \text{Br}$                                                      | jx(ip_IBr)       | Sander et al. (2014)  |

## General notes

J-values are calculated with an external module (e.g., JVAL) and then supplied to the MECCA chemistry.

Values that originate from the Master Chemical Mechanism (MCM) by Rickard and Pascoe (2009) are translated according in the following way:

J(11)  $\rightarrow$  jx(ip\_COH2)

J(12)  $\rightarrow$  jx(ip\_CHOH)

J(15)  $\rightarrow$  jx(ip\_HOCH2CHO)

J(18)  $\rightarrow$  jx(ip\_MACR)

J(22)  $\rightarrow$  jx(ip\_ACETOL)

J(23)+J(24)  $\rightarrow$  jx(ip\_MVK)

J(31)+J(32)+J(33)  $\rightarrow$  jx(ip\_GLYOX)

J(34)  $\rightarrow$  jx(ip\_MGLYOX)

J(41)  $\rightarrow$  jx(ip\_CH3OOH)

J(53)  $\rightarrow$  J(isopropyl nitrate)

J(54)  $\rightarrow$  J(isopropyl nitrate)

J(55)  $\rightarrow$  J(isopropyl nitrate)

J(56)+J(57)  $\rightarrow$  jx(ip\_NOA)

## Specific notes

J41006: product distribution as for HNO4

J7301: The quantum yields are recommended by Burkholder et al. (2015) for  $\lambda > 300\text{nm}$  and used here for the entire spectrum.

Table 3: Reversible (Henry’s law) equilibria and irreversible (“heterogenous”) uptake

| #          | labels           | reaction                                              | rate coefficient                                       | reference                                  |
|------------|------------------|-------------------------------------------------------|--------------------------------------------------------|--------------------------------------------|
| H1001f_a01 | TrAa01MblScScm   | $O_3 \rightarrow O_3(aq)$                             | $k_{\text{exf}}(01, \text{ind}_{O3})$                  | see general notes*                         |
| H1001b_a01 | TrAa01MblScScm   | $O_3(aq) \rightarrow O_3$                             | $k_{\text{exb}}(01, \text{ind}_{O3})$                  | see general notes*                         |
| H2102f_a01 | TrAa01MblScScm   | $H_2O_2 \rightarrow H_2O_2(aq)$                       | $k_{\text{exf}}(01, \text{ind}_{H2O2})$                | see general notes*                         |
| H2102b_a01 | TrAa01MblScScm   | $H_2O_2(aq) \rightarrow H_2O_2$                       | $k_{\text{exb}}(01, \text{ind}_{H2O2})$                | see general notes*                         |
| H3200f_a01 | TrAa01MblScScmN  | $NH_3 \rightarrow NH_3(aq)$                           | $k_{\text{exf}}(01, \text{ind}_{NH3})$                 | see general notes*                         |
| H3200b_a01 | TrAa01MblScScmN  | $NH_3(aq) \rightarrow NH_3$                           | $k_{\text{exb}}(01, \text{ind}_{NH3})$                 | see general notes*                         |
| H3201_a01  | TrAa01MblScScmN  | $N_2O_5 \rightarrow HNO_3(aq) + HNO_3(aq)$            | $k_{\text{exf\_N205}}(01) * C(\text{ind}_{H2O\_a01})$  | Behnke et al. (1994), Behnke et al. (1997) |
| H3203f_a01 | TrAa01MblScScmN  | $HNO_3 \rightarrow HNO_3(aq)$                         | $k_{\text{exf}}(01, \text{ind}_{HNO3})$                | see general notes*                         |
| H3203b_a01 | TrAa01MblScScmN  | $HNO_3(aq) \rightarrow HNO_3$                         | $k_{\text{exb}}(01, \text{ind}_{HNO3})$                | see general notes*                         |
| H4100f_a01 | TrAa01MblScScm   | $CO_2 \rightarrow CO_2(aq)$                           | $k_{\text{exf}}(01, \text{ind}_{CO2})$                 | see general notes*                         |
| H4100b_a01 | TrAa01MblScScm   | $CO_2(aq) \rightarrow CO_2$                           | $k_{\text{exb}}(01, \text{ind}_{CO2})$                 | see general notes*                         |
| H6000f_a01 | TrAa01MblScCl    | $Cl_2 \rightarrow Cl_2(aq)$                           | $k_{\text{exf}}(01, \text{ind}_{Cl2})$                 | see general notes*                         |
| H6000b_a01 | TrAa01MblScCl    | $Cl_2(aq) \rightarrow Cl_2$                           | $k_{\text{exb}}(01, \text{ind}_{Cl2})$                 | see general notes*                         |
| H6200f_a01 | TrAa01MblScScmCl | $HCl \rightarrow HCl(aq)$                             | $k_{\text{exf}}(01, \text{ind}_{HCl})$                 | see general notes*                         |
| H6200b_a01 | TrAa01MblScScmCl | $HCl(aq) \rightarrow HCl$                             | $k_{\text{exb}}(01, \text{ind}_{HCl})$                 | see general notes*                         |
| H6201f_a01 | TrAa01MblScCl    | $HOCl \rightarrow HOCl(aq)$                           | $k_{\text{exf}}(01, \text{ind}_{HOCl})$                | see general notes*                         |
| H6201b_a01 | TrAa01MblScCl    | $HOCl(aq) \rightarrow HOCl$                           | $k_{\text{exb}}(01, \text{ind}_{HOCl})$                | see general notes*                         |
| H6300_a01  | TrAa01MblClN     | $N_2O_5 + Cl^-(aq) \rightarrow ClNO_2 + NO_3^-(aq)$   | $k_{\text{exf\_N205}}(01) * 5.E2$                      | Behnke et al. (1994), Behnke et al. (1997) |
| H6301_a01  | TrAa01MblClN     | $ClNO_3 \rightarrow HOCl(aq) + HNO_3(aq)$             | $k_{\text{exf\_ClN03}}(01) * C(\text{ind}_{H2O\_a01})$ | see general notes*                         |
| H6302_a01  | TrAa01MblClN     | $ClNO_3 + Cl^-(aq) \rightarrow Cl_2(aq) + NO_3^-(aq)$ | $k_{\text{exf\_ClN03}}(01) * 5.E2$                     | see general notes*                         |
| H7000f_a01 | TrAa01MblScBr    | $Br_2 \rightarrow Br_2(aq)$                           | $k_{\text{exf}}(01, \text{ind}_{Br2})$                 | see general notes*                         |
| H7000b_a01 | TrAa01MblScBr    | $Br_2(aq) \rightarrow Br_2$                           | $k_{\text{exb}}(01, \text{ind}_{Br2})$                 | see general notes*                         |
| H7200f_a01 | TrAa01MblScScmBr | $HBr \rightarrow HBr(aq)$                             | $k_{\text{exf}}(01, \text{ind}_{HBr})$                 | see general notes*                         |
| H7200b_a01 | TrAa01MblScScmBr | $HBr(aq) \rightarrow HBr$                             | $k_{\text{exb}}(01, \text{ind}_{HBr})$                 | see general notes*                         |
| H7201f_a01 | TrAa01MblScBr    | $HOBr \rightarrow HOBr(aq)$                           | $k_{\text{exf}}(01, \text{ind}_{HOBr})$                | see general notes*                         |
| H7201b_a01 | TrAa01MblScBr    | $HOBr(aq) \rightarrow HOBr$                           | $k_{\text{exb}}(01, \text{ind}_{HOBr})$                | see general notes*                         |
| H7300_a01  | TrAa01MblBrN     | $N_2O_5 + Br^-(aq) \rightarrow BrNO_2 + NO_3^-(aq)$   | $k_{\text{exf\_N205}}(01) * 3.E5$                      | Behnke et al. (1994), Behnke et al. (1997) |
| H7301_a01  | TrAa01MblBrN     | $BrNO_3 \rightarrow HOBr(aq) + HNO_3(aq)$             | $k_{\text{exf\_BrN03}}(01) * C(\text{ind}_{H2O\_a01})$ | see general notes*                         |
| H7302_a01  | TrAa01MblBrN     | $BrNO_3 + Br^-(aq) \rightarrow Br_2(aq) + NO_3^-(aq)$ | $k_{\text{exf\_BrN03}}(01) * 3.E5$                     | see general notes*                         |

Table 3: Reversible (Henry’s law) equilibria and irreversible (“heterogenous”) uptake

| #          | labels          | reaction                                                                                                 | rate coefficient                                           | reference          |
|------------|-----------------|----------------------------------------------------------------------------------------------------------|------------------------------------------------------------|--------------------|
| H7600f_a01 | TrAa01MblScBrCl | $\text{BrCl} \rightarrow \text{BrCl(aq)}$                                                                | $k_{\text{exf}}(01, \text{ind\_BrCl})$                     | see general notes* |
| H7600b_a01 | TrAa01MblScBrCl | $\text{BrCl(aq)} \rightarrow \text{BrCl}$                                                                | $k_{\text{exb}}(01, \text{ind\_BrCl})$                     | see general notes* |
| H7601_a01  | TrAa01MblBrClN  | $\text{ClNO}_3 + \text{Br}^-(\text{aq}) \rightarrow \text{BrCl(aq)} + \text{NO}_3^-(\text{aq})$          | $k_{\text{exf\_ClNO3}}(01) * 3.E5$                         | see general notes* |
| H7602_a01  | TrAa01MblBrClN  | $\text{BrNO}_3 + \text{Cl}^-(\text{aq}) \rightarrow \text{BrCl(aq)} + \text{NO}_3^-(\text{aq})$          | $k_{\text{exf\_BrNO3}}(01) * 5.E2$                         | see general notes* |
| H8100f_a01 | TrAa01MblScI    | $\text{IO} \rightarrow \text{IO(aq)}$                                                                    | $k_{\text{exf}}(01, \text{ind\_IO})$                       | see general notes* |
| H8100b_a01 | TrAa01MblScI    | $\text{IO(aq)} \rightarrow \text{IO}$                                                                    | $k_{\text{exb}}(01, \text{ind\_IO})$                       | see general notes* |
| H8200f_a01 | TrAa01MblScI    | $\text{HOI} \rightarrow \text{HOI(aq)}$                                                                  | $k_{\text{exf}}(01, \text{ind\_HOI})$                      | see general notes* |
| H8200b_a01 | TrAa01MblScI    | $\text{HOI(aq)} \rightarrow \text{HOI}$                                                                  | $k_{\text{exb}}(01, \text{ind\_HOI})$                      | see general notes* |
| H8201_a01  | TrAa01MblScI    | $\text{HI} \rightarrow \text{H}^+(\text{aq}) + \text{I}^-(\text{aq})$                                    | $k_{\text{mt}}(\text{HI}) \cdot \text{lwc}$                | see general notes* |
| H8301_a01  | TrAa01MblIN     | $\text{INO}_3 \rightarrow \text{HOI(aq)} + \text{HNO}_3(\text{aq})$                                      | $k_{\text{exf}}(01, \text{ind\_INO3})$                     | see general notes* |
| H8600f_a01 | TrAa01MblScClI  | $\text{ICl} \rightarrow \text{ICl(aq)}$                                                                  | $k_{\text{exf}}(01, \text{ind\_ICl})$                      | see general notes* |
| H8600b_a01 | TrAa01MblScClI  | $\text{ICl(aq)} \rightarrow \text{ICl}$                                                                  | $k_{\text{exb}}(01, \text{ind\_ICl})$                      | see general notes* |
| H8700f_a01 | TrAa01MblScBrI  | $\text{IBr} \rightarrow \text{IBr(aq)}$                                                                  | $k_{\text{exf}}(01, \text{ind\_IBr})$                      | see general notes* |
| H8700b_a01 | TrAa01MblScBrI  | $\text{IBr(aq)} \rightarrow \text{IBr}$                                                                  | $k_{\text{exb}}(01, \text{ind\_IBr})$                      | see general notes* |
| H9100f_a01 | TrAa01MblScScmS | $\text{SO}_2 \rightarrow \text{SO}_2(\text{aq})$                                                         | $k_{\text{exf}}(01, \text{ind\_SO2})$                      | see general notes* |
| H9100b_a01 | TrAa01MblScScmS | $\text{SO}_2(\text{aq}) \rightarrow \text{SO}_2$                                                         | $k_{\text{exb}}(01, \text{ind\_SO2})$                      | see general notes* |
| H9200_a01  | TrAa01MblScScmS | $\text{H}_2\text{SO}_4 \rightarrow \text{H}_2\text{SO}_4(\text{aq})$                                     | $\text{xnom7sulf} * k_{\text{exf}}(01, \text{ind\_H2SO4})$ | see general notes* |
| H9401_a01  | TrAa01MblS      | $\text{CH}_3\text{SO}_3\text{H} \rightarrow \text{CH}_3\text{SO}_3^-(\text{aq}) + \text{H}^+(\text{aq})$ | $k_{\text{exf}}(01, \text{ind\_CH3SO3H})$                  | see general notes* |

## General notes

The forward ( $k_{\text{exf}}$ ) and backward ( $k_{\text{exb}}$ ) rate coefficients are calculated in subroutine `mecca_aero_calc_k_ex` in the file `messy_mecca_aero.f90` using accommodation coefficients and Henry’s law constants from `chemprop` (see `chemprop.pdf`).

For uptake of X ( $X = \text{N}_2\text{O}_5$ ,  $\text{ClNO}_3$ , or  $\text{BrNO}_3$ ) and

subsequent reaction with  $\text{H}_2\text{O}$ ,  $\text{Cl}^-$ , and  $\text{Br}^-$  in H3201, H6300, H6301, H6302, H7300, H7301, H7302, H7601, and H7602, we define:

$$k_{\text{exf}}(\text{X}) = \frac{k_{\text{mt}}(\text{X}) \times \text{LWC}}{[\text{H}_2\text{O}] + 5 \times 10^2 [\text{Cl}^-] + 3 \times 10^5 [\text{Br}^-]}$$

Here,  $k_{\text{mt}}$  = mass transfer coefficient, and LWC = liquid water content of the aerosol. The total uptake rate of X is only determined by  $k_{\text{mt}}$ . The factors only affect

the branching between hydrolysis and the halide reactions. The factor  $5 \times 10^2$  was chosen such that the chloride reaction dominates over hydrolysis at about  $[\text{Cl}^-] > 0.1 \text{ M}$  (see Fig. 3 in Behnke et al. (1997)), i.e. when the ratio  $[\text{H}_2\text{O}]/[\text{Cl}^-]$  is less than  $5 \times 10^2$ . The ratio  $5 \times 10^2 / 3 \times 10^5$  was chosen such that the reactions with chloride and bromide are roughly equal for sea water composition (Behnke et al., 1994). These ratios were measured for uptake of  $\text{N}_2\text{O}_5$ . Here, they are also used for  $\text{ClNO}_3$  and  $\text{BrNO}_3$ .

Table 4: Heterogeneous reactions

| # | labels | reaction | rate coefficient | reference |
|---|--------|----------|------------------|-----------|
|---|--------|----------|------------------|-----------|

## General notes

Heterogeneous reaction rates are calculated with an external module (e.g., MECCA\_KHET) and then supplied to the MECCA chemistry (see [www.messy-interface.org](http://www.messy-interface.org) for details)

Table 5: Acid-base and other equilibria

| #        | labels           | reaction                                                               | $K_0[M^{m-n}]$ | $-\Delta H/R[K]$ | reference                  |
|----------|------------------|------------------------------------------------------------------------|----------------|------------------|----------------------------|
| EQ21_a01 | TrAa01MblScScm   | $\text{H}_2\text{O} \rightleftharpoons \text{H}^+ + \text{OH}^-$       | 1.0E-16        | -6716            | Chameides (1984)           |
| EQ30_a01 | TrAa01MblScScmN  | $\text{NH}_4^+ \rightleftharpoons \text{H}^+ + \text{NH}_3$            | 5.88E-10       | -2391            | Chameides (1984)           |
| EQ32_a01 | TrAa01MblScScmN  | $\text{HNO}_3 \rightleftharpoons \text{H}^+ + \text{NO}_3^-$           | 15             | 8700             | Davis and de Bruin (1964)  |
| EQ40_a01 | TrAa01MblScScm   | $\text{CO}_2 \rightleftharpoons \text{H}^+ + \text{HCO}_3^-$           | 4.3E-7         | -913             | Chameides (1984)*          |
| EQ61_a01 | TrAa01MblScScmCl | $\text{HCl} \rightleftharpoons \text{H}^+ + \text{Cl}^-$               | 1.7E6          | 6896             | Marsh and McElroy (1985)   |
| EQ71_a01 | TrAa01MblScScmBr | $\text{HBr} \rightleftharpoons \text{H}^+ + \text{Br}^-$               | 1.0E9          |                  | Lax (1969)                 |
| EQ73_a01 | TrAa01MblBrCl    | $\text{BrCl} + \text{Cl}^- \rightleftharpoons \text{BrCl}_2^-$         | 3.8            | 1191             | Wang et al. (1994)         |
| EQ74_a01 | TrAa01MblBrCl    | $\text{BrCl} + \text{Br}^- \rightleftharpoons \text{Br}_2\text{Cl}^-$  | 1.8E4          | 7457             | Wang et al. (1994)         |
| EQ75_a01 | TrAa01MblBrCl    | $\text{Br}_2 + \text{Cl}^- \rightleftharpoons \text{Br}_2\text{Cl}^-$  | 1.3            | 0                | Wang et al. (1994)         |
| EQ76_a01 | TrAa01MblBrCl    | $\text{Br}^- + \text{Cl}_2 \rightleftharpoons \text{BrCl}_2^-$         | 4.2E6          | 14072            | Wang et al. (1994)         |
| EQ80_a01 | TrAa01MblScClI   | $\text{ICl} + \text{Cl}^- \rightleftharpoons \text{ICl}_2^-$           | 7.7E1          |                  | Wang et al. (1989)         |
| EQ81_a01 | TrAa01MblScBrI   | $\text{IBr} + \text{Br}^- \rightleftharpoons \text{IBr}_2^-$           | 2.9E2          |                  | Troy and Margerum (1991)   |
| EQ82_a01 | TrAa01MblScBrClI | $\text{ICl} + \text{Br}^- \rightleftharpoons \text{IBr} + \text{Cl}^-$ | 3.3E2          |                  | see note*                  |
| EQ90_a01 | TrAa01MblScScmS  | $\text{SO}_2 \rightleftharpoons \text{H}^+ + \text{HSO}_3^-$           | 1.7E-2         | 2090             | Chameides (1984)           |
| EQ91_a01 | TrAa01MblScScmS  | $\text{HSO}_3^- \rightleftharpoons \text{H}^+ + \text{SO}_3^{2-}$      | 6.0E-8         | 1120             | Chameides (1984)           |
| EQ92_a01 | TrAa01MblScScmS  | $\text{HSO}_4^- \rightleftharpoons \text{H}^+ + \text{SO}_4^{2-}$      | 1.2E-2         | 2720             | Seinfeld and Pandis (1998) |
| EQ93_a01 | TrAa01MblScScmS  | $\text{H}_2\text{SO}_4 \rightleftharpoons \text{H}^+ + \text{HSO}_4^-$ | 1.0E3          |                  | Seinfeld and Pandis (1998) |

## Specific notes

EQ40\_a01: For  $pK_a(\text{CO}_2)$ , see also Dickson and Millero (1987).

EQ82\_a01: Thermodynamic calculations on the IBr/ICl equilibrium according to the data tables from Wagman et al. (1982):

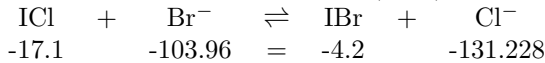

$$\frac{\Delta G}{[\text{kJ/mol}]} = -4.2 - 131.228 - (-17.1 - 103.96) = -14.368$$

$$K = \frac{[\text{IBr}] \times [\text{Cl}^-]}{[\text{ICl}] \times [\text{Br}^-]} = \exp\left(\frac{-\Delta G}{RT}\right) = \exp\left(\frac{14368}{8.314 \times 298}\right) = 330$$

This means we have equal amounts of IBr and ICl when the  $[\text{Cl}^-]/[\text{Br}^-]$  ratio equals 330.



Table 6: Aqueous phase reactions

| #         | labels          | reaction                                          | $k_0$ [ $M^{1-n}s^{-1}$ ] | $-E_a/R[K]$ | reference                  |
|-----------|-----------------|---------------------------------------------------|---------------------------|-------------|----------------------------|
| A6204_a01 | TrAa01MblCl     | $Cl_2 \rightarrow Cl^- + HOCl + H^+$              | 21.8                      | -8012       | Wang and Margerum (1994)   |
| A6208_a01 | TrAa01MblCl     | $HOCl + Cl^- + H^+ \rightarrow Cl_2$              | 2.2E4                     | -3508       | Wang and Margerum (1994)   |
| A7202_a01 | TrAa01MblBr     | $Br_2 \rightarrow Br^- + HOBr + H^+$              | 9.7E1                     | -7457       | Beckwith et al. (1996)     |
| A7208_a01 | TrAa01MblBr     | $HOBr + Br^- + H^+ \rightarrow Br_2$              | 1.6E10                    |             | Beckwith et al. (1996)     |
| A7602_a01 | TrAa01MblBrCl   | $Br^- + HOCl + H^+ \rightarrow BrCl$              | 1.32E6                    |             | Kumar and Margerum (1987)  |
| A7603_a01 | TrAa01MblBrCl   | $HOBr + Cl^- + H^+ \rightarrow BrCl$              | 2.3E10                    |             | Liu and Margerum (2001)*   |
| A7604_a01 | TrAa01MblBrCl   | $BrCl \rightarrow Cl^- + HOBr + H^+$              | 3.0E6                     |             | Liu and Margerum (2001)    |
| A8100_a01 | TrAa01MblI      | $I^- + O_3 \rightarrow HOI + OH^-$                | 4.2E9                     | -9311       | Magi et al. (1997)         |
| A8101_a01 | TrAa01MblI      | $IO + IO \rightarrow HOI + IO_2^- + H^+$          | 1.5E9                     |             | Buxton et al. (1986)       |
| A8200_a01 | TrAa01MblI      | $IO_2^- + H_2O_2 \rightarrow IO_3^-$              | 6.0E1                     |             | Furrow (1987)              |
| A8202_a01 | TrAa01MblI      | $HOI + I^- + H^+ \rightarrow I_2$                 | 4.4E12                    |             | Eigen and Kustin (1962)    |
| A8203_a01 | TrAa01MblI      | $IO_2^- + I^- + H^+ \rightarrow 2 HOI + OH^-$     | 2.0E10                    |             | Edblom et al. (1987)       |
| A8600_a01 | TrAa01MblClI    | $ICl \rightarrow HOI + Cl^- + H^+$                | 2.4E6                     |             | Wang et al. (1989)         |
| A8601_a01 | TrAa01MblClI    | $I^- + HOCl + H^+ \rightarrow ICl$                | 3.5E11                    |             | Nagy et al. (1988)         |
| A8603_a01 | TrAa01MblClI    | $HOI + Cl^- + H^+ \rightarrow ICl$                | 2.9E10                    |             | Wang et al. (1989)         |
| A8700_a01 | TrAa01MblBrI    | $IBr \rightarrow HOI + H^+ + Br^-$                | 8.0E5                     |             | Troy et al. (1991)         |
| A8701_a01 | TrAa01MblBrI    | $I^- + HOBr \rightarrow IBr + OH^-$               | 5.0E9                     |             | Troy and Margerum (1991)   |
| A8703_a01 | TrAa01MblBrI    | $HOI + Br^- + H^+ \rightarrow IBr$                | 3.3E12                    |             | Troy et al. (1991)         |
| A9101_a01 | TrAa01MblScScmS | $SO_3^{2-} + O_3 \rightarrow SO_4^{2-}$           | 1.5E9                     | -5300       | Hoffmann (1986)            |
| A9206_a01 | TrAa01MblScScmS | $HSO_3^- + O_3 \rightarrow SO_4^{2-} + H^+$       | 3.7E5                     | -5500       | Hoffmann (1986)            |
| A9209_a01 | TrAa01MblScScmS | $HSO_3^- + H_2O_2 \rightarrow SO_4^{2-} + H^+$    | 5.2E6                     | -3650       | Martin and Damschen (1981) |
| A9601_a01 | TrAa01MblClS    | $SO_3^{2-} + HOCl \rightarrow Cl^- + HSO_4^-$     | 7.6E8                     |             | Fogelman et al. (1989)     |
| A9605_a01 | TrAa01MblClS    | $HSO_3^- + HOCl \rightarrow Cl^- + HSO_4^- + H^+$ | 7.6E8                     |             | see note*                  |
| A9702_a01 | TrAa01MblBrS    | $SO_3^{2-} + HOBr \rightarrow Br^- + HSO_4^-$     | 5.0E9                     |             | Troy and Margerum (1991)   |
| A9705_a01 | TrAa01MblBrS    | $HSO_3^- + HOBr \rightarrow Br^- + HSO_4^- + H^+$ | 5.0E9                     |             | see note*                  |

## Specific notes

A9605\_a01: Assumed to be the same as for  $SO_3^{2-} + HOCl$ .  
A9705\_a01: Assumed to be the same as for  $SO_3^{2-} + HOBr$ .

A7603\_a01: The rate coefficient is defined as backward reaction divided by equilibrium constant.

## References

- Albaladejo, J., Jiménez, E., Notario, A., Cabañas, B., and Martínez, E.:  $\text{CH}_3\text{O}$  yield in the  $\text{CH}_3 + \text{O}_3$  reaction using the LP/LIF technique at room temperature, *J. Phys. Chem. A*, 106, 2512–2519, doi:10.1021/jp012249o, 2002.
- Anderson, L. C. and Fahey, D. W.: Studies with  $\text{ClONO}_2$ : Thermal dissociation rate and catalytic conversion to NO using an NO/ $\text{O}_3$  chemiluminescence detector, *J. Phys. Chem.*, 94, 644–652, 1990.
- Atkinson, R.: Kinetics of the gas-phase reactions of OH radicals with alkanes and cycloalkanes, *Atmos. Chem. Phys.*, 3, 2233–2307, 2003.
- Atkinson, R., Baulch, D. L., Cox, R. A., Crowley, J. N., Hampson, R. F., Hynes, R. G., Jenkin, M. E., Rossi, M. J., Troe, J., and IUPAC Subcommittee: Evaluated kinetic and photochemical data for atmospheric chemistry: Volume II – gas phase reactions of organic species, *Atmos. Chem. Phys.*, 6, 3625–4055, 2006.
- Atkinson, R., Baulch, D. L., Cox, R. A., Crowley, J. N., Hampson, R. F., Hynes, R. G., Jenkin, M. E., Rossi, M. J., and Troe, J.: Evaluated kinetic and photochemical data for atmospheric chemistry: Volume III – gas phase reactions of inorganic halogens, *Atmos. Chem. Phys.*, 7, 981–1191, 2007.
- Bale, C. S. E., Canosa-Mas, C. E., Shallcross, D. E., and Wayne, R. P.: A discharge-flow study of the kinetics of the reactions of IO with  $\text{CH}_3\text{O}_2$  and  $\text{CF}_3\text{O}_2$ , *Phys. Chem. Chem. Phys.*, 7, 2164–2172, 2005.
- Banic, C. M., Beauchamp, S. T., Tordon, R. J., Schroeder, W. H., Steffen, A., Anlauf, K. A., and Wong, H. K. T.: Vertical distribution of gaseous elemental mercury in Canada, *J. Geophys. Res.*, 108D, 4264, doi:10.1029/2002JD002116, 2003.
- Barnes, I., Becker, K. H., Fink, E. H., Reimer, A., Zabel, F., and Niki, H.: FTIR spectroscopic study of the gas-phase reaction of  $\text{HO}_2$  with  $\text{H}_2\text{CO}$ , *Chem. Phys. Lett.*, 115, 1–8, doi:10.1016/0009-2614(85)80091-9, 1985.
- Barone, S. B., Turnipseed, A. A., and Ravishankara, A. R.: Role of adducts in the atmospheric oxidation of dimethyl sulfide, *Faraday Discuss.*, 100, 39–54, 1995.
- Baulch, D. L., Bowman, C. T., Cobos, C. J., Cox, R. A., Just, T., Kerr, J. A., Pilling, M. J., Stocker, D., Troe, J., Tsang, W., Walker, R. W., and Warnatz, J.: Evaluated kinetic data for combustion modeling: Supplement II, *J. Phys. Chem. Ref. Data*, 34, 757–1397, 2005.
- Becker, K. H., Kurtenbach, R., Schmidt, F., and Wiesen, P.: Kinetics of the NCO radical reacting with atoms and selected molecules, *Combust. Flame*, 120, 570–577, doi:10.1016/S0010-2180(99)00108-X, 2000.
- Beckwith, R. C., Wang, T. X., and Margerum, D. W.: Equilibrium and kinetics of bromine hydrolysis, *Inorg. Chem.*, 35, 995–1000, 1996.
- Bedjanian, Y., Laverdet, G., and Le Bras, G.: Low-pressure study of the reaction of Cl atoms with isoprene, *J. Phys. Chem. A*, 102, 953–959, 1998.
- Behnke, W., Scheer, V., and Zetzsch, C.: Production of  $\text{BrNO}_2$ ,  $\text{Br}_2$  and  $\text{ClNO}_2$  from the reaction between sea spray aerosol and  $\text{N}_2\text{O}_5$ , *J. Aerosol Sci.*, 25, S277–S278, 1994.
- Behnke, W., George, C., Scheer, V., and Zetzsch, C.: Production and decay of  $\text{ClNO}_2$  from the reaction of gaseous  $\text{N}_2\text{O}_5$  with NaCl solution: Bulk and aerosol experiments, *J. Geophys. Res.*, 102D, 3795–3804, 1997.
- Bossolasco, A., Faragó, E. P., Schoemaeker, C., and Fittschen, C.: Rate constant of the reaction between  $\text{CH}_3\text{O}_2$  and OH radicals, *Chem. Phys. Lett.*, 593, 7–13, doi:10.1016/j.cplett.2013.12.052, 2014.
- Buras, Z. J., Elsamra, R. M. I., and Green, W. H.: Direct determination of the simplest Criegee intermediate ( $\text{CH}_2\text{OO}$ ) self reaction rate, *J. Phys. Chem. Lett.*, 5, 2224–2228, doi:10.1021/jz5008406, 2014.
- Burkholder, J. B., Sander, S. P., Abbatt, J., Barker, J. R., Huie, R. E., Kolb, C. E., Kurylo, M. J., Orkin, V. L., Wilmouth, D. M., and Wine, P. H.: Chemical Kinetics and Photochemical Data for Use in Atmospheric Studies, Evaluation No. 18, JPL Publication 15-10, Jet Propulsion Laboratory, Pasadena, <http://jpldataeval.jpl.nasa.gov>, 2015.
- Butkovskaya, N., Kukui, A., and Le Bras, G.: Pressure and temperature dependence of methyl nitrate formation in the  $\text{CH}_3\text{O}_2 + \text{NO}$  reaction, *J. Phys. Chem. A*, 116, 5972–5980, doi:10.1021/jp210710d, 2012.
- Buxton, G. V., Kilner, C., and Sellers, R. M.: Pulse radiolysis of HOI and  $\text{IO}^-$  in aqueous solution. Formation and characterization of I(II), *Proc. Tihany Symp. Radiat. Chem.*, 6, 155–159, 1986.
- Chai, J., Hu, H., Dibble, T. S., Tyndall, G. S., and Orlando, J. J.: Rate constants and kinetic isotope effects for methoxy radical reacting with  $\text{NO}_2$  and  $\text{O}_2$ , *J. Phys. Chem. A*, 118, 3552–3563, doi:10.1021/jp501205d, 2014.
- Chameides, W. L.: The photochemistry of a remote marine stratiform cloud, *J. Geophys. Res.*, 89D, 4739–4755, 1984.

- Chao, W., Hsieh, J.-T., Chang, C.-H., and Lin, J. J.-M.: Direct kinetic measurement of the reaction of the simplest Criegee intermediate with water vapor, *Science*, 347, 751–754, doi:10.1126/science.1261549, 2015.
- Clyne, M. A. A. and Cruse, H. W.: Atomic resonance fluorescence spectrometry for the rate constants of rapid bimolecular reactions. Part 2. Reactions  $\text{Cl} + \text{BrCl}$ ,  $\text{Cl} + \text{Br}_2$ ,  $\text{Cl} + \text{ICl}$ ,  $\text{Br} + \text{IBr}$ ,  $\text{Br} + \text{ICl}$ , *J. Chem. Soc. Faraday Trans. 2*, 68, 1377–1387, 1972.
- Conn, J. B., Kistiakowsky, G. B., Roberts, R. M., and Smith, E. A.: Heats of organic reactions. XIII. Heats of hydrolysis of some acid anhydrides, *Journal of the American Chemical Society*, 64, 1747–1752, doi:10.1021/ja01260a001, 1942.
- Davis, Jr., W. and de Bruin, H. J.: New activity coefficients of 0–100 per cent aqueous nitric acid, *J. Inorg. Nucl. Chem.*, 26, 1069–1083, 1964.
- Dickson, A. G. and Millero, F. J.: A comparison of the equilibrium constants for the dissociation of carbonic acid in seawater media, *Deep-Sea Res. A*, 34, 1733–1743, 1987.
- Dillon, T. J., Tucceri, M. E., and Crowley, J. N.: Laser induced fluorescence studies of iodine oxide chemistry. Part II. The reactions of  $\text{IO}$  with  $\text{CH}_3\text{O}_2$ ,  $\text{CF}_3\text{O}_2$  and  $\text{O}_3$ , *Phys. Chem. Chem. Phys.*, 8, 5185–5198, 2006.
- Dillon, T. J., Tucceri, M. E., Sander, R., and Crowley, J. N.: LIF studies of iodine oxide chemistry, part 3. Reactions  $\text{IO} + \text{NO}_3 \rightarrow \text{OIO} + \text{NO}_2$ ,  $\text{I} + \text{NO}_3 \rightarrow \text{IO} + \text{NO}_2$ , and  $\text{CH}_2\text{I} + \text{O}_2 \rightarrow (\text{products})$ : Implications for the chemistry of the marine atmosphere at night., *Phys. Chem. Chem. Phys.*, 10, 1540–1554, 2008.
- Dolson, D. A. and Leone, S. R.: A reinvestigation of the laser-initiated chlorine/hydrogen bromide chain reaction: absolute rate constants and the  $v = 2/v = 1$  ratio from chlorine atom + hydrogen bromide  $\rightarrow$  hydrogen chloride( $v$ ) + bromine atom, *J. Phys. Chem.*, 91, 3543–3550, 1987.
- Edblom, E. C., Györgyi, L., Orbán, M., and Epstein, I. R.: A mechanism for dynamical behavior in the Landolt reaction with ferrocyanide, *J. Am. Chem. Soc.*, 109, 4876–4880, 1987.
- Eigen, M. and Kustin, K.: The kinetics of halogen hydrolysis, *J. Am. Chem. Soc.*, 84, 1355–1361, 1962.
- Finkbeiner, M., Crowley, J. N., Horie, O., Müller, R., Moortgat, G. K., and Crutzen, P. J.: Reaction between  $\text{HO}_2$  and  $\text{ClO}$ : Product formation between 210 and 300 K, *J. Phys. Chem.*, 99, 16 264–16 275, 1995.
- Flocke, F., Atlas, E., Madronich, S., Schauffler, S. M., Aikin, K., Margitan, J. J., and Bui, T. P.: Observations of methyl nitrate in the lower stratosphere during STRAT: implications for its gas phase production mechanisms, *Geophys. Res. Lett.*, 25, 1891–1894, 1998.
- Fogelman, K. D., Walker, D. M., and Margerum, D. W.: Non-metal redox kinetics: Hypochlorite and hypochlorous acid reactions with sulfite, *Inorg. Chem.*, 28, 986–993, 1989.
- Furrow, S.: Reactions of iodine intermediates in iodate-hydrogen peroxide oscillators, *J. Phys. Chem.*, 91, 2129–2135, 1987.
- Gruzdev, A. N., Elokhov, A. S., Makarov, O. V., and Mokhov, I. I.: Some recent results of Russian measurements of surface ozone in Antarctica. A meteorological interpretation, *Tellus*, 45B, 99–105, 1993.
- Hoffmann, M. R.: On the kinetics and mechanism of oxidation of aquated sulfur dioxide by ozone, *Atmos. Environ.*, 20, 1145–1154, 1986.
- Jenkin, M., Saunders, S. M., and Pilling, M. J.: The tropospheric degradation of volatile organic compounds: A protocol for mechanism development, *Atmos. Environ.*, 31, 81–104, 1997.
- Kleinböhl, A., Toon, G. C., Sen, B., Blavier, J.-F. L., Weisenstein, D. K., Strekowski, R. S., Nicovich, J. M., Wine, P. H., and Wennberg, P. O.: On the stratospheric chemistry of hydrogen cyanide, *Geophys. Res. Lett.*, 33, doi:10.1029/2006GL026015, 2006.
- Kohlmann, J.-P. and Poppe, D.: The tropospheric gas-phase degradation of  $\text{NH}_3$  and its impact on the formation of  $\text{N}_2\text{O}$  and  $\text{NO}_x$ , *J. Atmos. Chem.*, 32, 397–415, 1999.
- Kondo, O. and Benson, S. W.: Kinetics and equilibria in the system  $\text{Br} + \text{CH}_3\text{OOH} \rightleftharpoons \text{HBr} + \text{CH}_3\text{OO}$ . An upper limit for the heat of formation of the methylperoxy radical, *J. Phys. Chem.*, 88, 6675–6680, 1984.
- Kumar, K. and Margerum, D. W.: Kinetics and mechanism of general-acid-assisted oxidation of bromide by hypochlorite and hypochlorous acid, *Inorg. Chem.*, 26, 2706–2711, 1987.
- Lax, E.: *Taschenbuch für Chemiker und Physiker*, Springer Verlag, Berlin, 1969.
- Lewis, T. R., Blitz, M. A., Heard, D. E., and Seakins, P. W.: Direct evidence for a substantive reaction between the Criegee intermediate,  $\text{CH}_2\text{OO}$ , and the water vapour dimer, *Phys. Chem. Chem. Phys.*, 17, 4859–4863, doi:10.1039/C4CP04750H, 2015.

- Liu, Q. and Margerum, D. W.: Equilibrium and kinetics of bromine chloride hydrolysis, *Environ. Sci. Technol.*, 35, 1127–1133, 2001.
- Magi, L., Schweitzer, F., Pallares, C., Cherif, S., Mirabel, P., and George, C.: Investigation of the uptake rate of ozone and methyl hydroperoxide by water surfaces, *J. Phys. Chem. A*, 101, 4943–4949, 1997.
- Manion, J. A., Huie, R. E., Levin, R. D., Burgess, Jr., D. R., Orkin, V. L., Tsang, W., McGivern, W. S., Hudgens, J. W., Knyazev, V. D., Atkinson, D. B., Chai, E., Tereza, A. M., Lin, C.-Y., Allison, T. C., Mallard, W. G., Westley, F., Herron, J. T., Hampson, R. F., and Frizzell, D. H.: NIST Chemical Kinetics Database, NIST Standard Reference Database 17 (Web Version), <http://kinetics.nist.gov>, 2015.
- Marsh, A. R. W. and McElroy, W. J.: The dissociation constant and Henry’s law constant of HCl in aqueous solution, *Atmos. Environ.*, 19, 1075–1080, 1985.
- Martin, L. R. and Damschen, D. E.: Aqueous oxidation of sulfur dioxide by hydrogen peroxide at low pH, *Atmos. Environ.*, 15, 1615–1621, 1981.
- McCabe, D. C., Gierczak, T., Talukdar, R. K., and Ravishankara, A. R.: Kinetics of the reaction  $\text{OH} + \text{CO}$  under atmospheric conditions, *Geophys. Res. Lett.*, 28, 3135–3138, 2001.
- Munger, J. W., Jacob, D. J., Fan, S.-M., Colman, A. S., and Dibb, J. E.: Concentrations and snow-atmosphere fluxes of reactive nitrogen at Summit, Greenland, *J. Geophys. Res.*, 104D, 13 721–13 734, 1999.
- Nagy, J. C., Kumar, K., and Margerum, D. W.: Non-metal redox kinetics: Oxidation of iodide by hypochlorous acid and by nitrogen trichloride measured by the pulsed-accelerated-flow method, *Inorg. Chem.*, 27, 2773–2780, 1988.
- Nakano, Y., Ishiwata, T., and Kawasaki, M.: Rate constants of the reaction of  $\text{NO}_3$  with  $\text{CH}_3\text{I}$  measured with use of cavity ring-down spectroscopy, *J. Phys. Chem. A*, 109, 6527–6531, 2005.
- Nielsen, O. J., Sidebottom, H. W., Donlon, M., and Treacy, J.: Rate constants for the gas-phase reactions of OH radicals and Cl atoms with *n*-alkyl nitrites at atmospheric pressure and 298 K, *Int. J. Chem. Kinetics*, 23, 1095–1109, doi:10.1002/kin.550231204, 1991.
- Ogryzlo, E. A., Paltenghi, R., and Bayes, K. D.: The rate of reaction of methyl radicals with ozone, *Int. J. Chem. Kinetics*, 13, 667–675, doi:10.1002/kin.550130707, 1981.
- Olzmann, M., Kraka, E., Cremer, D., Gutbrod, R., and Andersson, S.: Energetics, kinetics, and product distributions of the reactions of ozone with ethene and 2,3-dimethyl-2-butene, *J. Phys. Chem. A*, 101, 9421–9429, 1997.
- Orlando, J. J. and Tyndall, G. S.: Rate coefficients for the thermal decomposition of  $\text{BrONO}_2$  and the heat of formation of  $\text{BrONO}_2$ , *J. Phys. Chem.*, 100, 19 398–19 405, 1996.
- Ouyang, B., McLeod, M. W., Jones, R. L., and Bloss, W. J.:  $\text{NO}_3$  radical production from the reaction between the Criegee intermediate  $\text{CH}_2\text{OO}$  and  $\text{NO}_2$ , *Phys. Chem. Chem. Phys.*, 15, 17 070–17 075, doi:10.1039/c3cp53024h, 2013.
- Paulot, F., Wunch, D., Crounse, J. D., Toon, G. C., Millet, D. B., DeCarlo, P. F., Vigouroux, C., Deutscher, N. M., González Abad, G., Notholt, J., Warneke, T., Hannigan, J. W., Warneke, C., de Gouw, J. A., Dunlea, E. J., De Mazière, M., Griffith, D. W. T., Bernath, P., Jimenez, J. L., and Wennberg, P. O.: Importance of secondary sources in the atmospheric budgets of formic and acetic acids, *Atmos. Chem. Phys.*, 11, 1989–2013, doi:10.5194/acp-11-1989-2011, 2011.
- Plane, J. M. C., Joseph, D. M., Allan, B. J., Ashworth, S. H., and Francisco, J. S.: An experimental and theoretical study of the reactions  $\text{OIO} + \text{NO}$  and  $\text{OIO} + \text{OH}$ , *J. Phys. Chem. A*, 110, 93–100, 2006.
- Rickard, A. and Pascoe, S.: The Master Chemical Mechanism (MCM), <http://mcm.leeds.ac.uk>, 2009.
- Sander, R., Jöckel, P., Kirner, O., Kunert, A. T., Landgraf, J., and Pozzer, A.: The photolysis module JVAL-14, compatible with the MESSy standard, and the JVal PreProcessor (JVPP), *Geosci. Model Dev.*, 7, 2653–2662, <http://www.geosci-model-dev.net/7/2653>, 2014.
- Scribano, Y., Goldman, N., Saykally, R. J., and Leforestier, C.: Water dimers in the atmosphere III: Equilibrium constant from a flexible potential, *J. Phys. Chem. A*, 110, 5411–5419, doi:10.1021/jp056759k, 2006.
- Seinfeld, J. H. and Pandis, S. N.: *Atmospheric Chemistry and Physics*, John Wiley & Sons, Inc., 1998.
- Shallcross, D. E., Leather, K. E., Bacak, A., Xiao, P., Lee, E. P. F., Ng, M., Mok, D. K. W., Dyke, J. M., Hossaini, R., Chipperfield, M. P., Khan, M. A. H., and Percival, C. J.: Reaction between  $\text{CH}_3\text{O}_2$  and BrO radicals: a new source of upper troposphere lower stratosphere hydroxyl radicals, *J. Phys. Chem. A*, 119, 4618–4632, 2015.

- Sivakumaran, V., Hölscher, D., Dillon, T. J., and Crowley, J. N.: Reaction between OH and HCHO: temperature dependent rate coefficients (202–399 K) and product pathways (298 K), *Phys. Chem. Chem. Phys.*, 5, 4821–4827, 2003.
- Sokolov, O., Hurley, M. D., Ball, J. C., Wallington, T. J., Nelsen, W., Barnes, I., and Becker, K. H.: Kinetics of the reactions of chlorine atoms with  $\text{CH}_3\text{ONO}$  and  $\text{CH}_3\text{ONO}_2$ , *Int. J. Chem. Kinetics*, 31, 357–359, 1999.
- Stone, D., Blitz, M., Daubney, L., Howes, N. U. M., and Seakins, P.: Kinetics of  $\text{CH}_2\text{OO}$  reactions with  $\text{SO}_2$ ,  $\text{NO}_2$ ,  $\text{NO}$ ,  $\text{H}_2\text{O}$  and  $\text{CH}_3\text{CHO}$  as a function of pressure, *Phys. Chem. Chem. Phys.*, 16, 1139–1149, doi:10.1039/c3cp54391a, 2014.
- Strekowski, R. S., Nicovich, J. M., and Wine, P. H.: Kinetic and mechanistic study of the Reactions of  $\text{O}(^1\text{D}_2)$  with  $\text{HCN}$  and  $\text{CH}_3\text{CN}$ , *Chem. Phys. Chem.*, 11, 3942–3955, doi:10.1002/cphc.201000550, 2010.
- Taraborrelli, D.: Isoprene oxidation and its impacts on the atmospheric composition, Ph.D. thesis, Johannes Gutenberg-Universität, Mainz, Germany, <http://d-nb.info/1003538770/34>, 2010.
- Troy, R. C. and Margerum, D. W.: Non-metal redox kinetics: Hypobromite and hypobromous acid reactions with iodide and with sulfite and the hydrolysis of bromosulfate, *Inorg. Chem.*, 30, 3538–3543, 1991.
- Troy, R. C., Kelley, M. D., Nagy, J. C., and Margerum, D. W.: Non-metal redox kinetics: Iodine monobromide reaction with iodide ion and the hydrolysis of  $\text{IBr}$ , *Inorg. Chem.*, 30, 4838–4845, 1991.
- van den Bergh, H. and Troe, J.: Kinetic and thermodynamic properties of  $\text{INO}$  and  $\text{INO}_2$  intermediate complexes in iodine recombination, *J. Chem. Phys.*, 64, 736–742, 1976.
- Vereecken, L. and Francisco, J. S.: Theoretical studies of atmospheric reaction mechanisms in the troposphere, *Chem. Soc. Rev.*, 41, 6259–6293, doi:10.1039/c2cs35070j, 2012.
- Vereecken, L., Harder, H., and Novelli, A.: The reaction of Criegee intermediates with  $\text{NO}$ ,  $\text{RO}_2$ , and  $\text{SO}_2$ , and their fate in the atmosphere, *Phys. Chem. Chem. Phys.*, 14, 14682–14695, doi:10.1039/c2cp42300f, 2012.
- Vereecken, L., Harder, H., and Novelli, A.: The reactions of Criegee intermediates with alkenes, ozone, and carbonyl oxides, *Phys. Chem. Chem. Phys.*, 16, 4039–4049, doi:10.1039/c3cp54514h, 2014.
- von Glasow, R., Sander, R., Bott, A., and Crutzen, P. J.: Modeling halogen chemistry in the marine boundary layer, 1. Cloud-free MBL, *J. Geophys. Res.*, 107D, 4341, doi:10.1029/2001JD000942, 2002.
- Wagman, D. D., Evans, W. H., Parker, V. B., Schumm, R. H., Halow, I., Bailey, S. M., Churney, K. L., and Nuttall, R. L.: The NBS tables of chemical thermodynamic properties; Selected values for inorganic and  $\text{C}_1$  and  $\text{C}_2$  organic substances in SI units, *J. Phys. Chem. Ref. Data*, 11, suppl. 2, 1982.
- Wallington, T. J., Ammann, M., Cox, R. A., Crowley, J. N., Herrmann, H., Jenkin, M. E., McNeill, V., Mellouki, A., Rossi, M. J., and Troe, J.: IUPAC Task group on atmospheric chemical kinetic data evaluation: Evaluated kinetic data, <http://iupac.pole-ether.fr>, 2017.
- Wang, T. X. and Margerum, D. W.: Kinetics of reversible chlorine hydrolysis: Temperature dependence and general-acid/base-assisted mechanisms, *Inorg. Chem.*, 33, 1050–1055, 1994.
- Wang, T. X., Kelley, M. D., Cooper, J. N., Beckwith, R. C., and Margerum, D. W.: Equilibrium, kinetic, and UV-spectral characteristics of aqueous bromine chloride, bromine, and chlorine species, *Inorg. Chem.*, 33, 5872–5878, 1994.
- Wang, Y. L., Nagy, J. C., and Margerum, D. W.: Kinetics of hydrolysis of iodine monochloride measured by the pulsed-accelerated-flow method, *J. Am. Chem. Soc.*, 111, 7838–7844, 1989.
- Wayne, R. P., Barnes, I., Biggs, P., Burrows, J. P., Canosa-Mas, C. E., Hjorth, J., Le Bras, G., Moortgat, G. K., Perner, D., Poulet, G., Restelli, G., and Sidebottom, H.: The nitrate radical: Physics, chemistry, and the atmosphere, *Atmos. Environ.*, 25A, 1–203, 1991.
- Welz, O., Savee, J. D., Osborn, D. L., Vasu, S. S., Percival, C. J., Shallcross, D. E., and Taatjes, C. A.: Direct kinetic measurements of Criegee intermediate ( $\text{CH}_2\text{OO}$ ) formed by reaction of  $\text{CH}_2\text{I}$  with  $\text{O}_2$ , *Science*, 335, 204–207, doi:10.1126/science.1213229, 2012.
- Welz, O., Eskola, A. J., Sheps, L., Rotavera, B., Savee, J. D., Scheer, A. M., Osborn, D. L., Lowe, D., Booth, A. M., Xiao, P., Khan, M. A. H., Percival, C. J., Shallcross, D. E., and Taatjes, C. A.: Rate coefficients of  $\text{C1}$  and  $\text{C2}$  Criegee intermediate reactions with formic and acetic acid near the collision limit: Direct kinetics measurements and atmospheric implications, *Angew. Chem.*, 126, 4635–4638, doi:10.1002/ange.201400964, 2014.
- Zellner, R., Hartmann, D., Karthäuser, J., Rhäsa, D., and Weibring, G.: A laser photolysis/LIF study of the reactions of  $\text{O}(^3\text{P})$  atoms with  $\text{CH}_3$  and  $\text{CH}_3\text{O}_2$  radicals, *J. Chem. Soc. Faraday Trans. 2*, 84, 549–568, doi:10.1039/f29888400549, 1988.
