# Supplementary material for: Halogen activation in the plume of Masaya volcano: field observations and box model investigations
Source: Copernicus journal article supplement (doi:10.5194/acp-21-3371-2021), 2021-03-04
Supplement: Supplementary file 22 [file acp-21-3371-2021-supplement.zip]

Archive with 4 entries (4 files):
- ACP-2020-284_Supplementary_Material.pdf
- CAABA-MECCA-Model_mechanism.pdf
- caaba_3.8m_volc1.zip
- acp-21-3371-2021-supplement-title-page.pdf
