# Supplementary figures and images for: Halogen activation in the plume of Masaya volcano: field observations and box model investigations
Source: Copernicus journal article supplement (doi:10.5194/acp-21-3371-2021), 2021-03-04

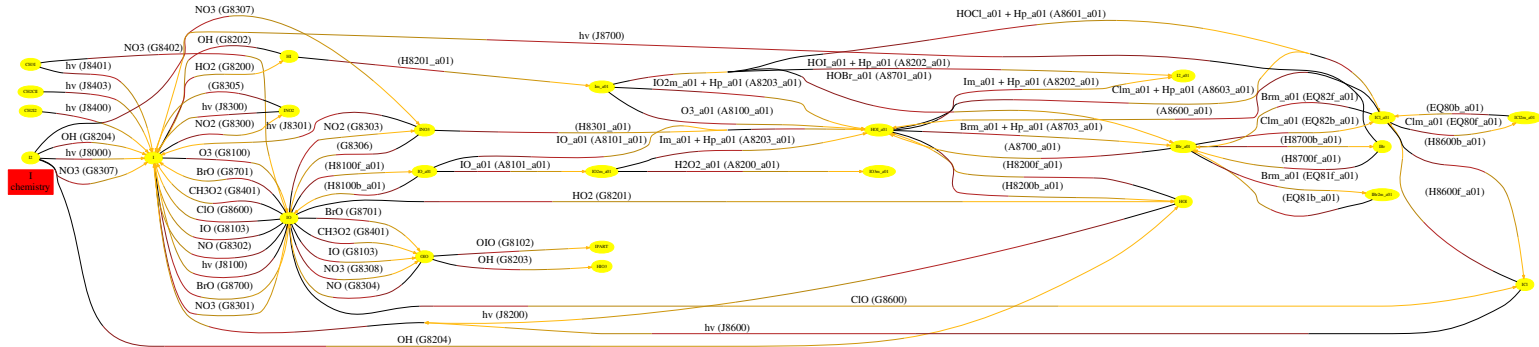

Supplement: Supplementary file 2 [file acp-21-3371-2021-supplement.zip]

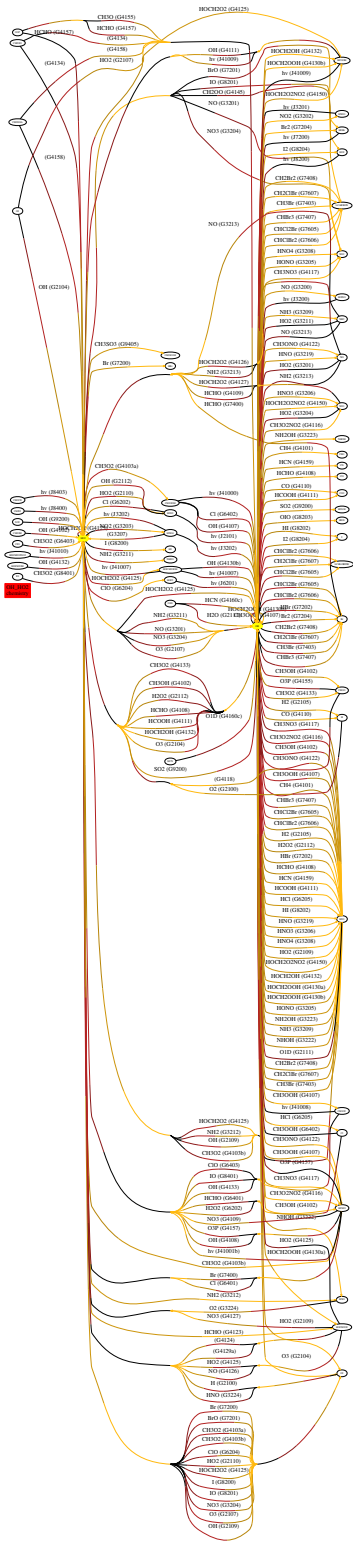

Supplement: Supplementary file 4 [file acp-21-3371-2021-supplement.zip]

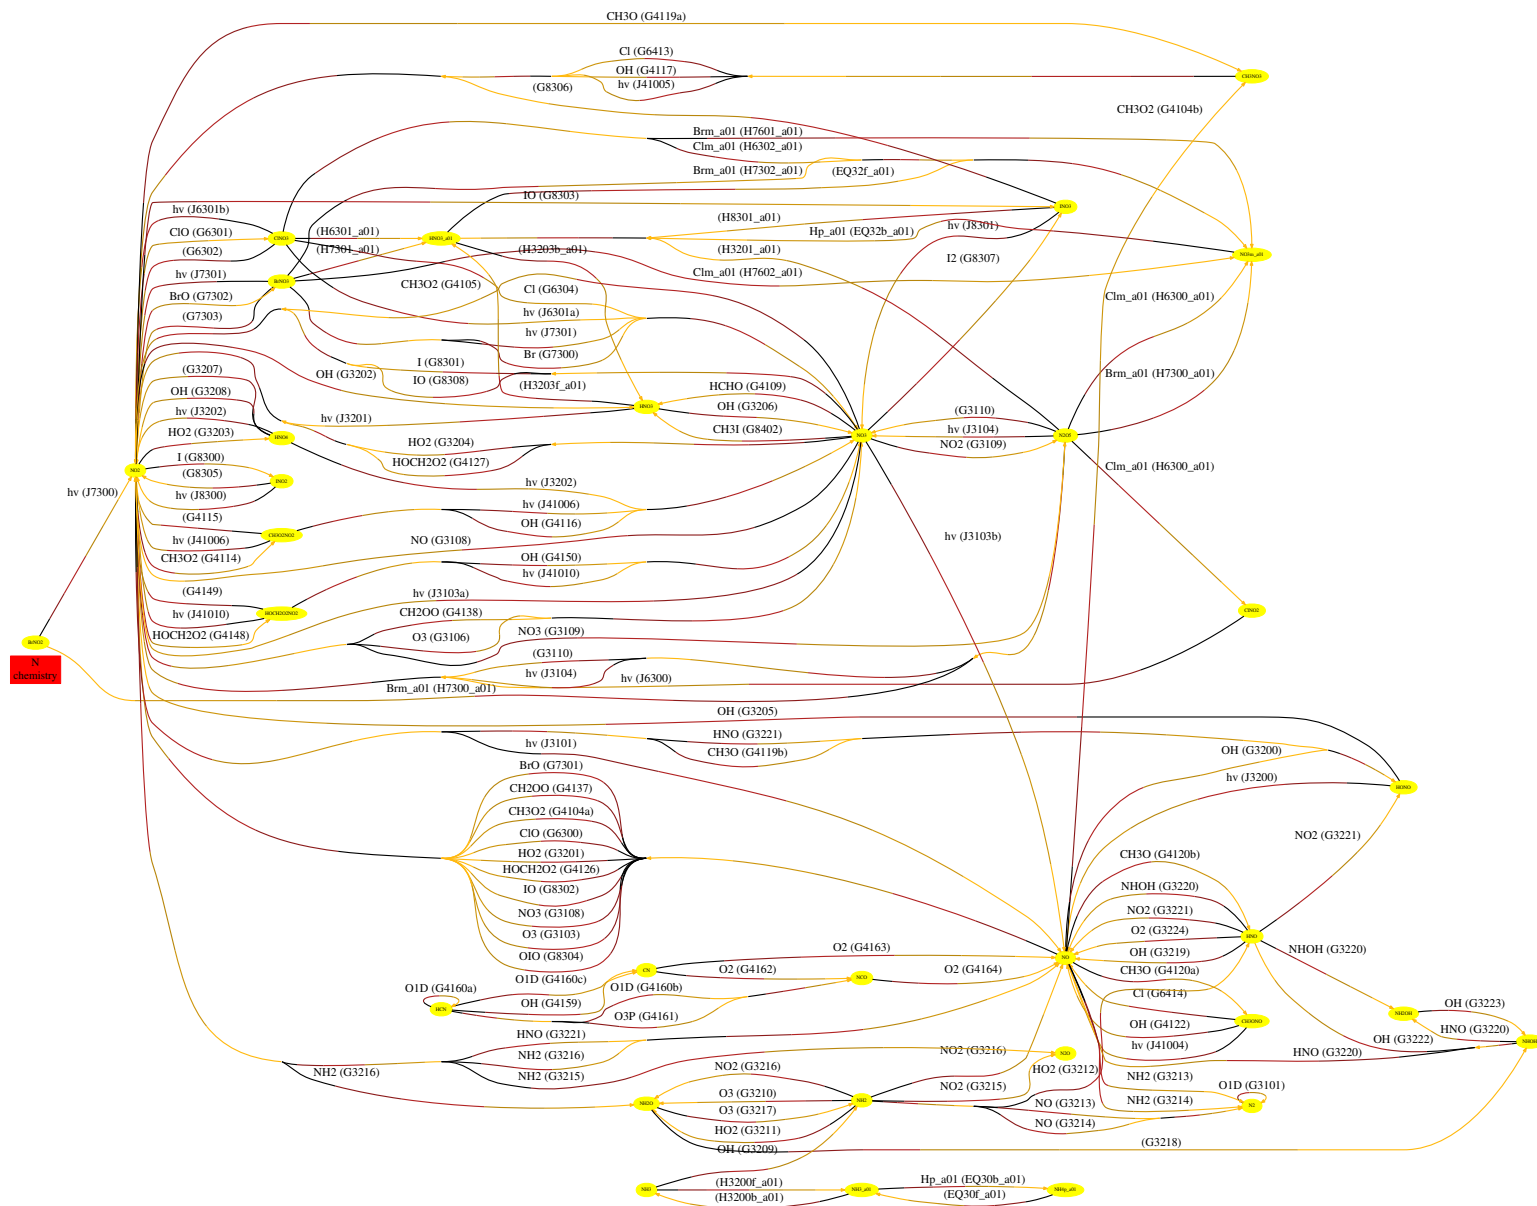

Supplement: Supplementary file 5 [file acp-21-3371-2021-supplement.zip]

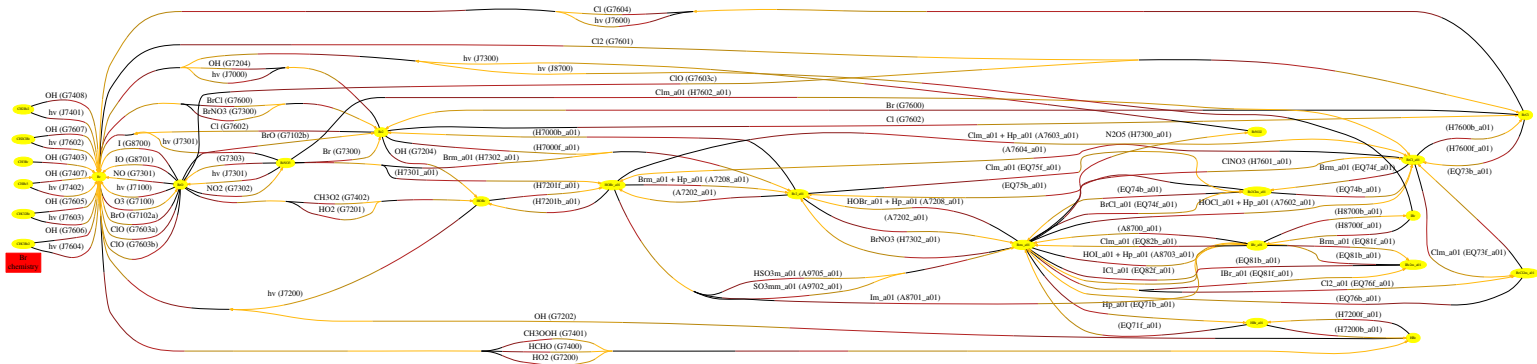

Supplement: Supplementary file 12 [file acp-21-3371-2021-supplement.zip]

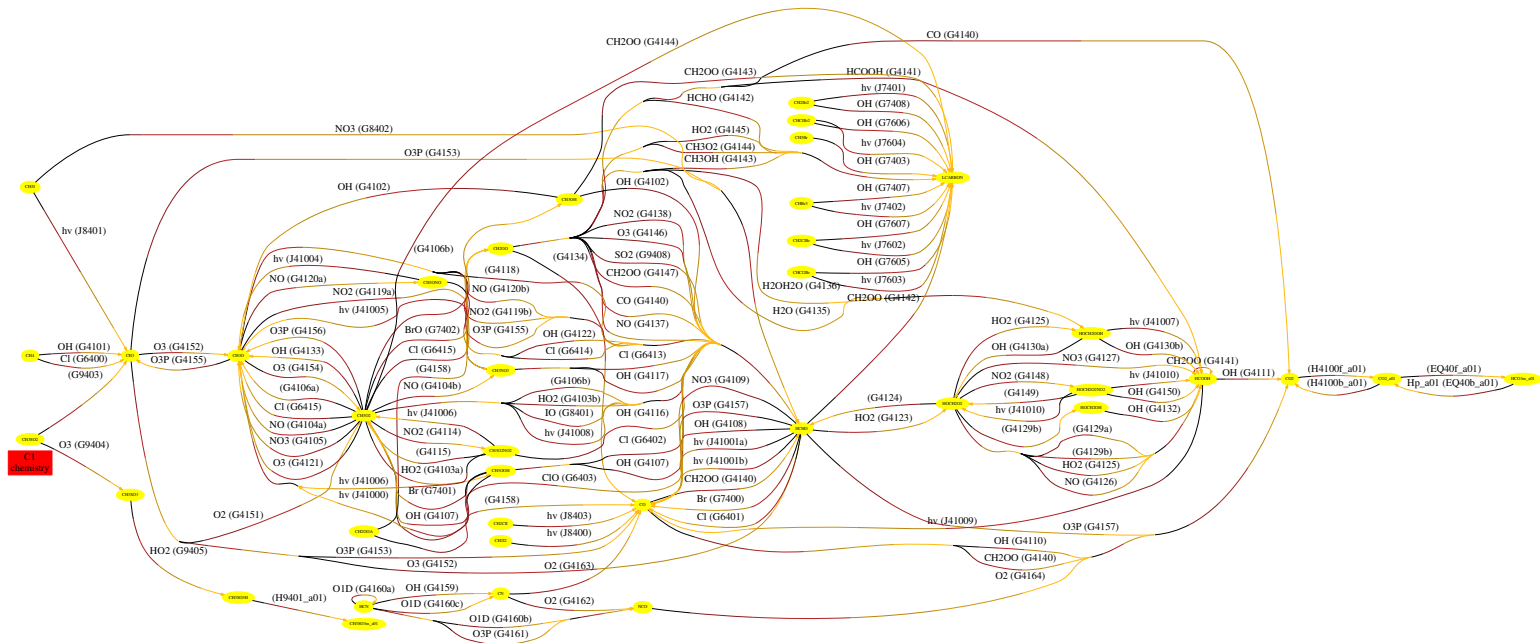

Supplement: Supplementary file 15 [file acp-21-3371-2021-supplement.zip]

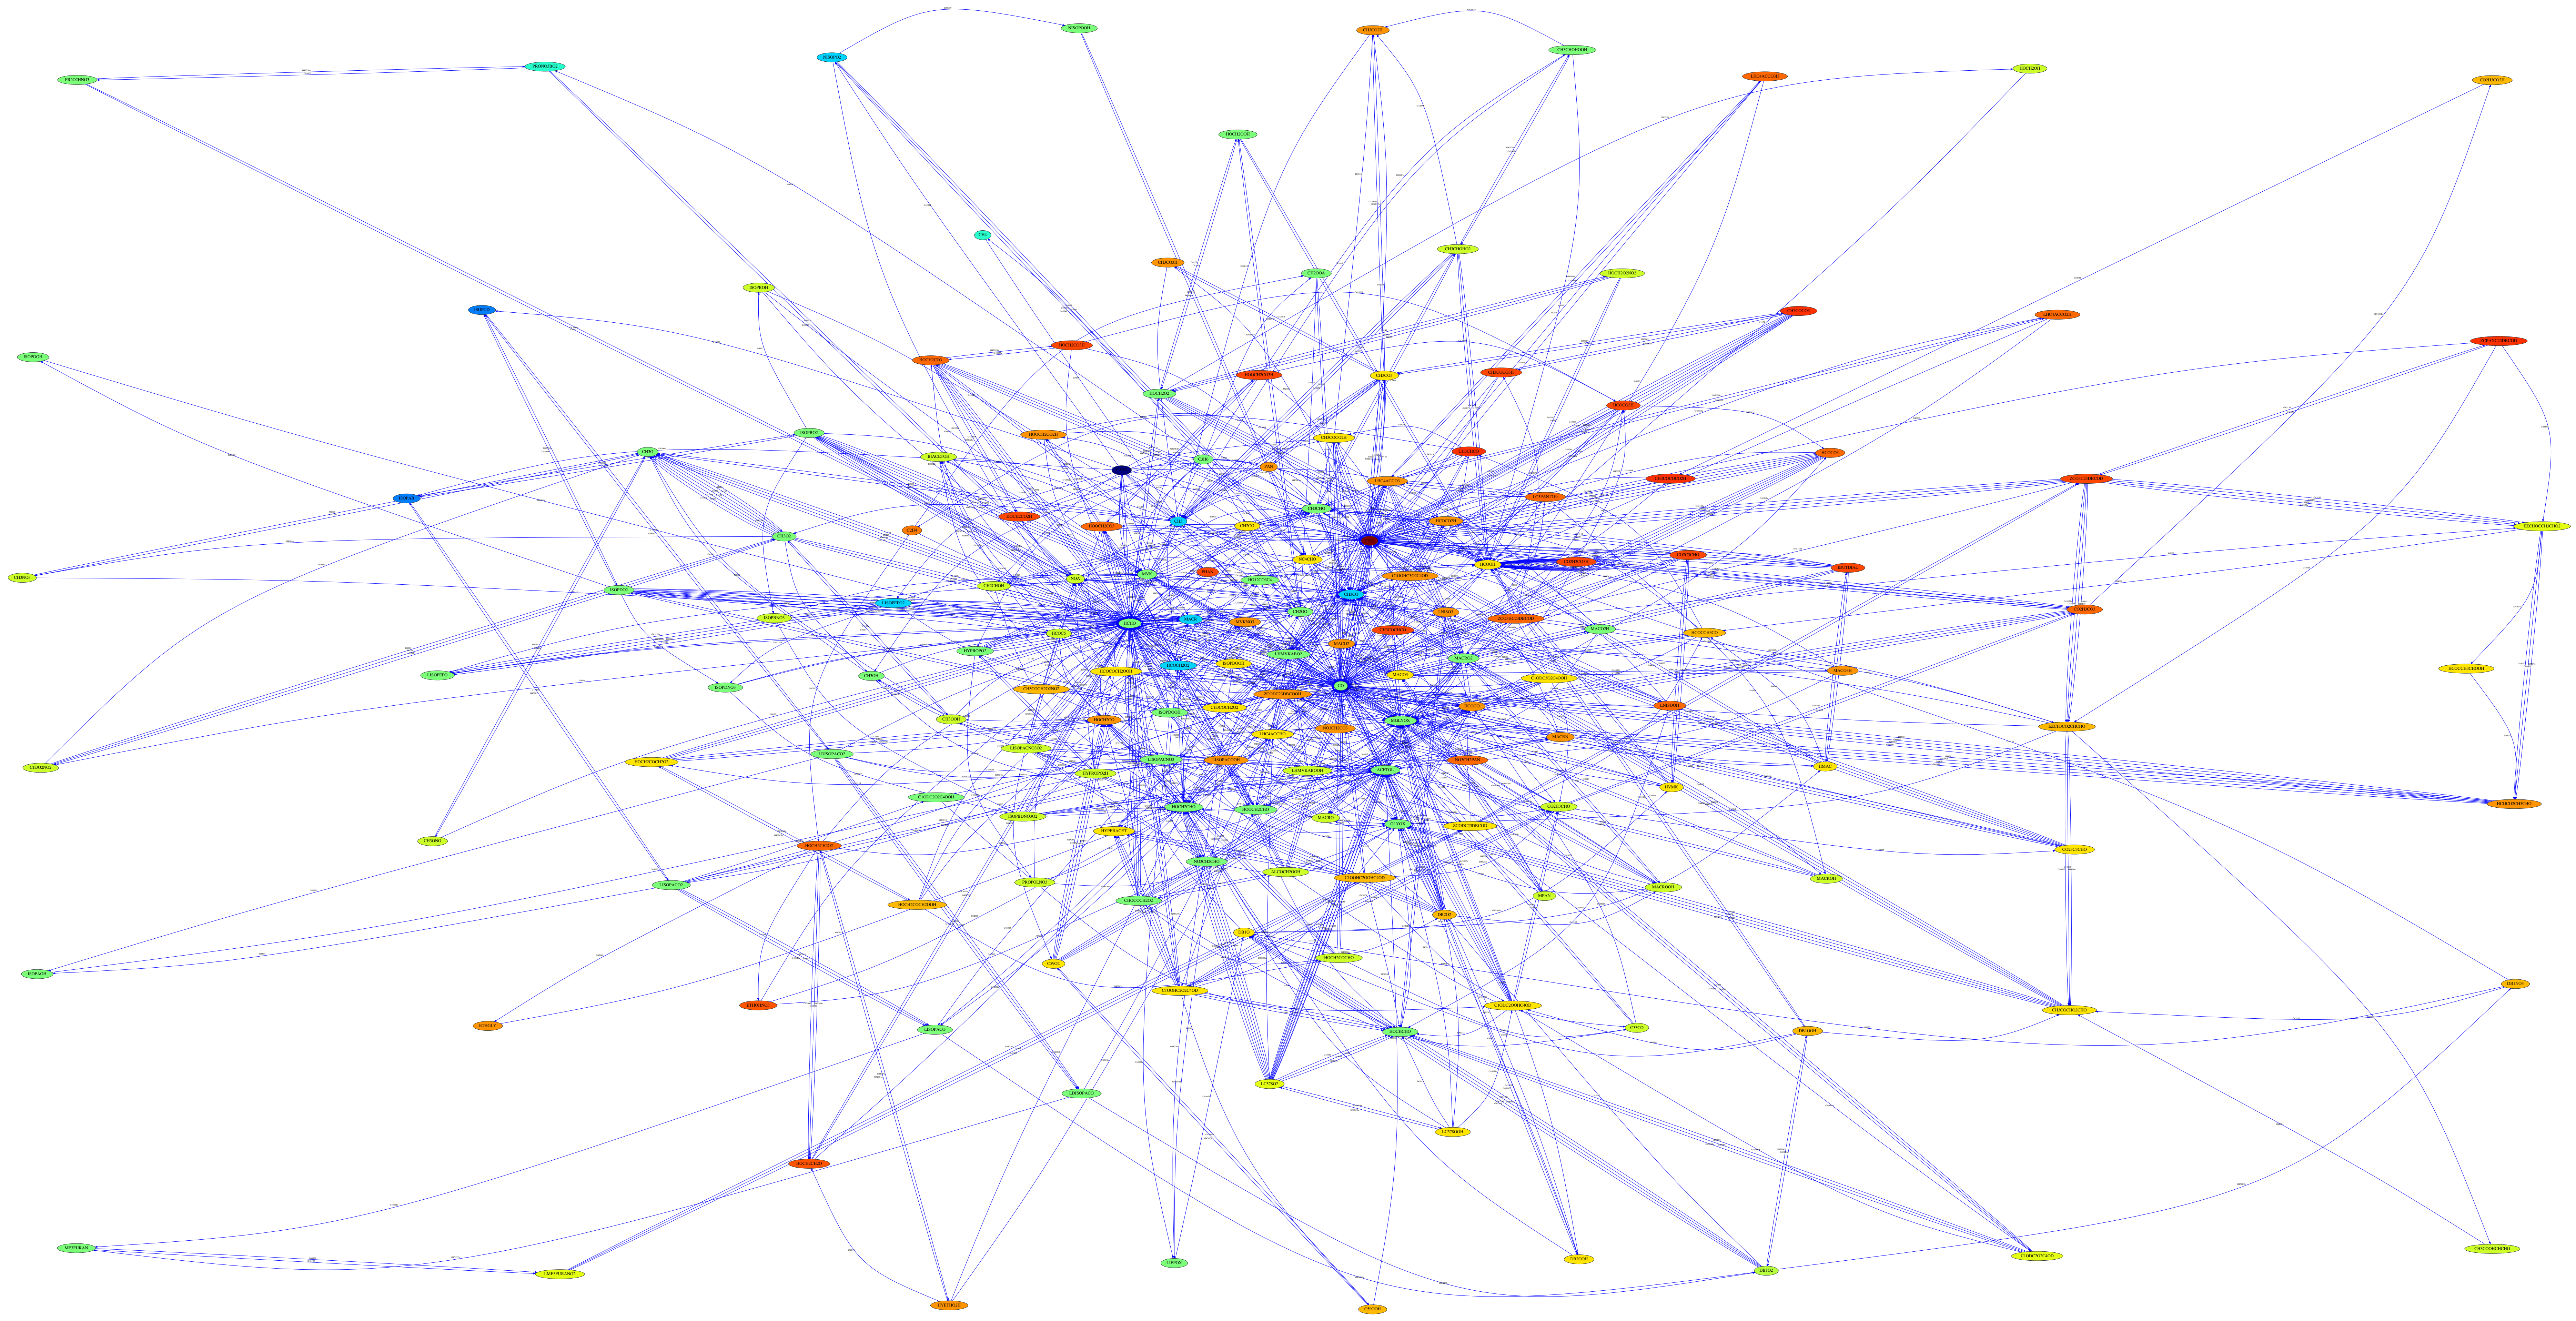

Supplement: Supplementary file 17 [file acp-21-3371-2021-supplement.zip]

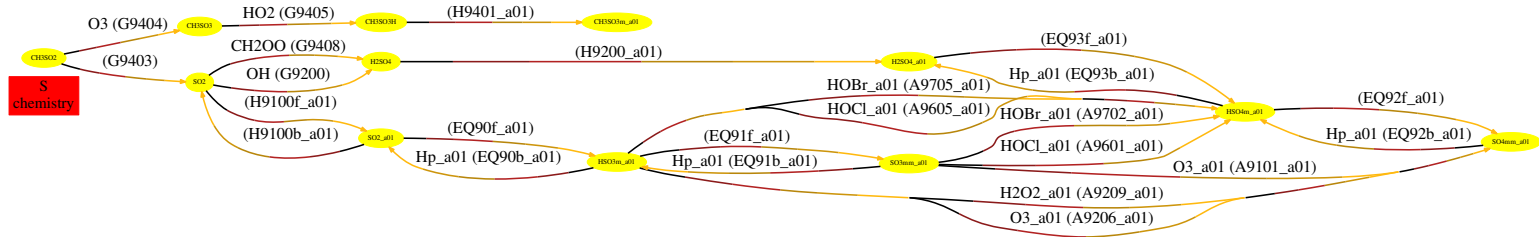

Supplement: Supplementary file 18 [file acp-21-3371-2021-supplement.zip]

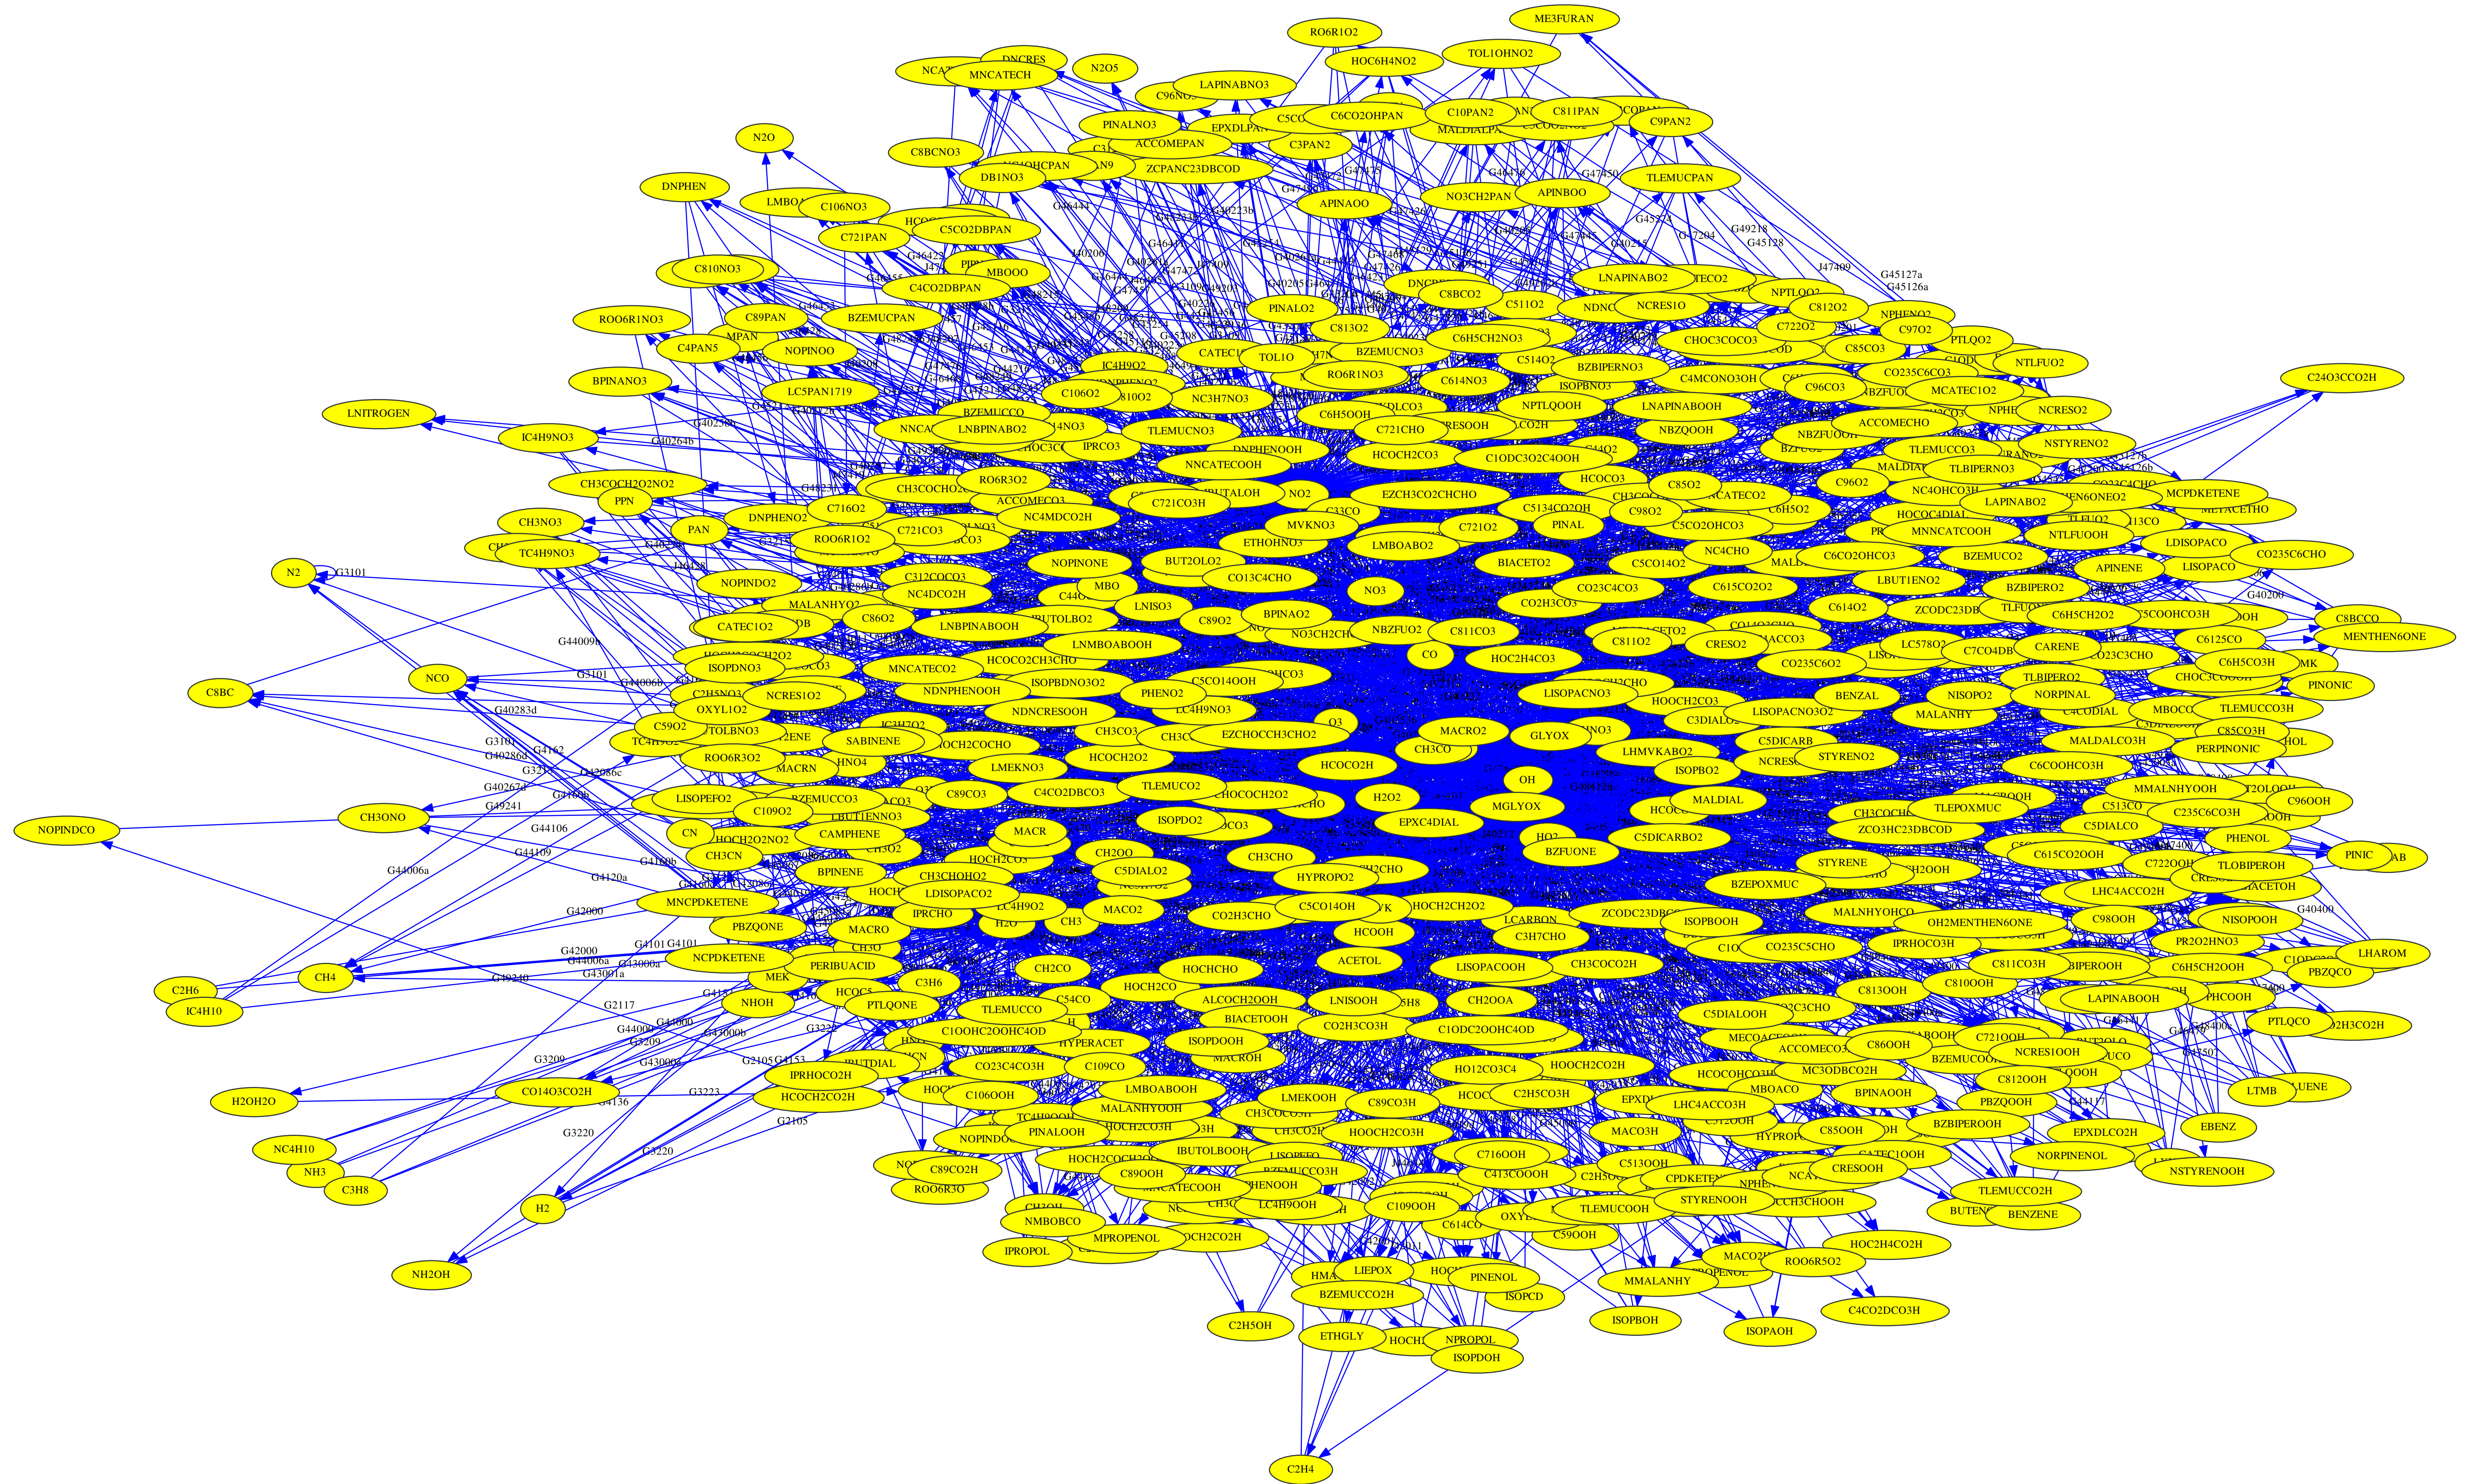

Supplement: Supplementary file 24 [file acp-21-3371-2021-supplement.zip]

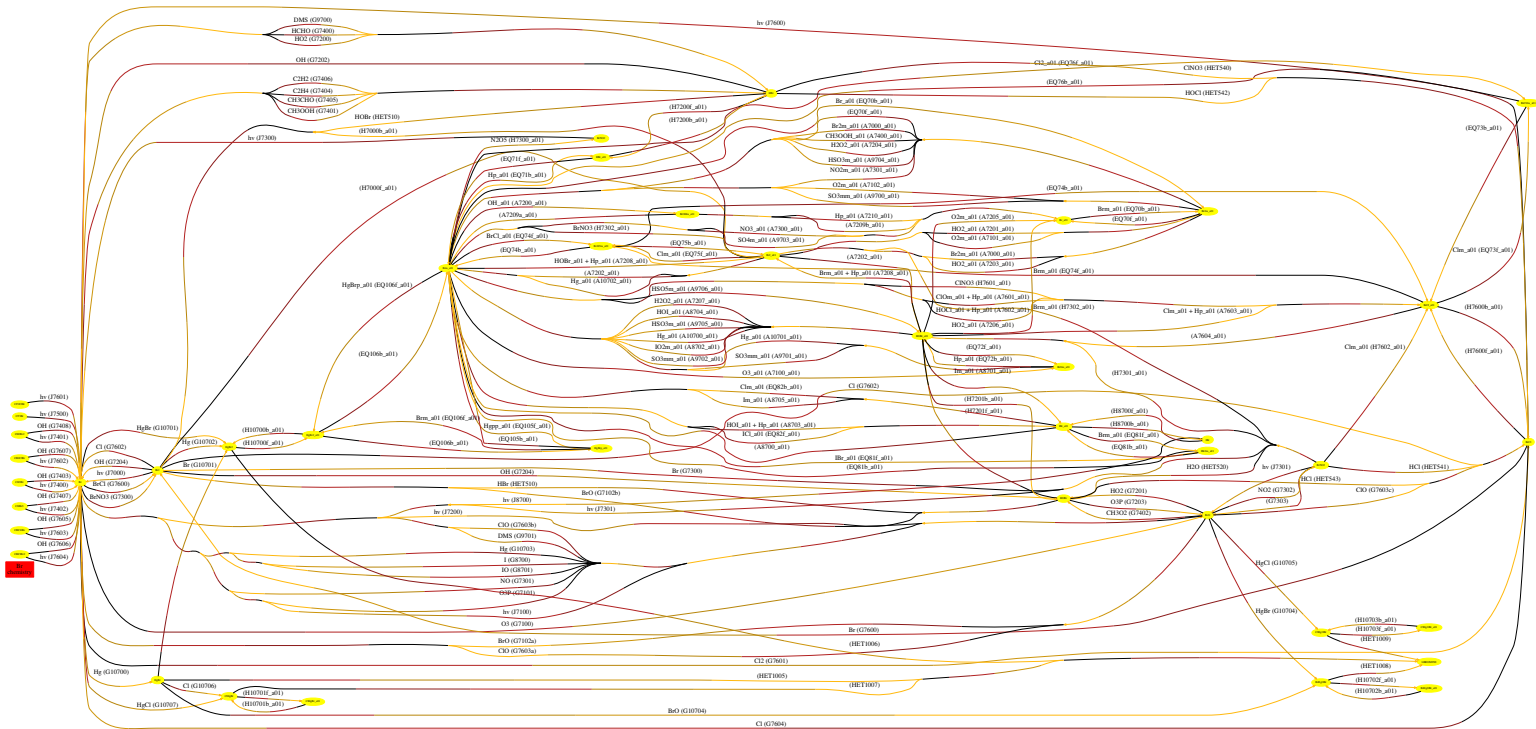

Supplement: Supplementary file 27 [file acp-21-3371-2021-supplement.zip]

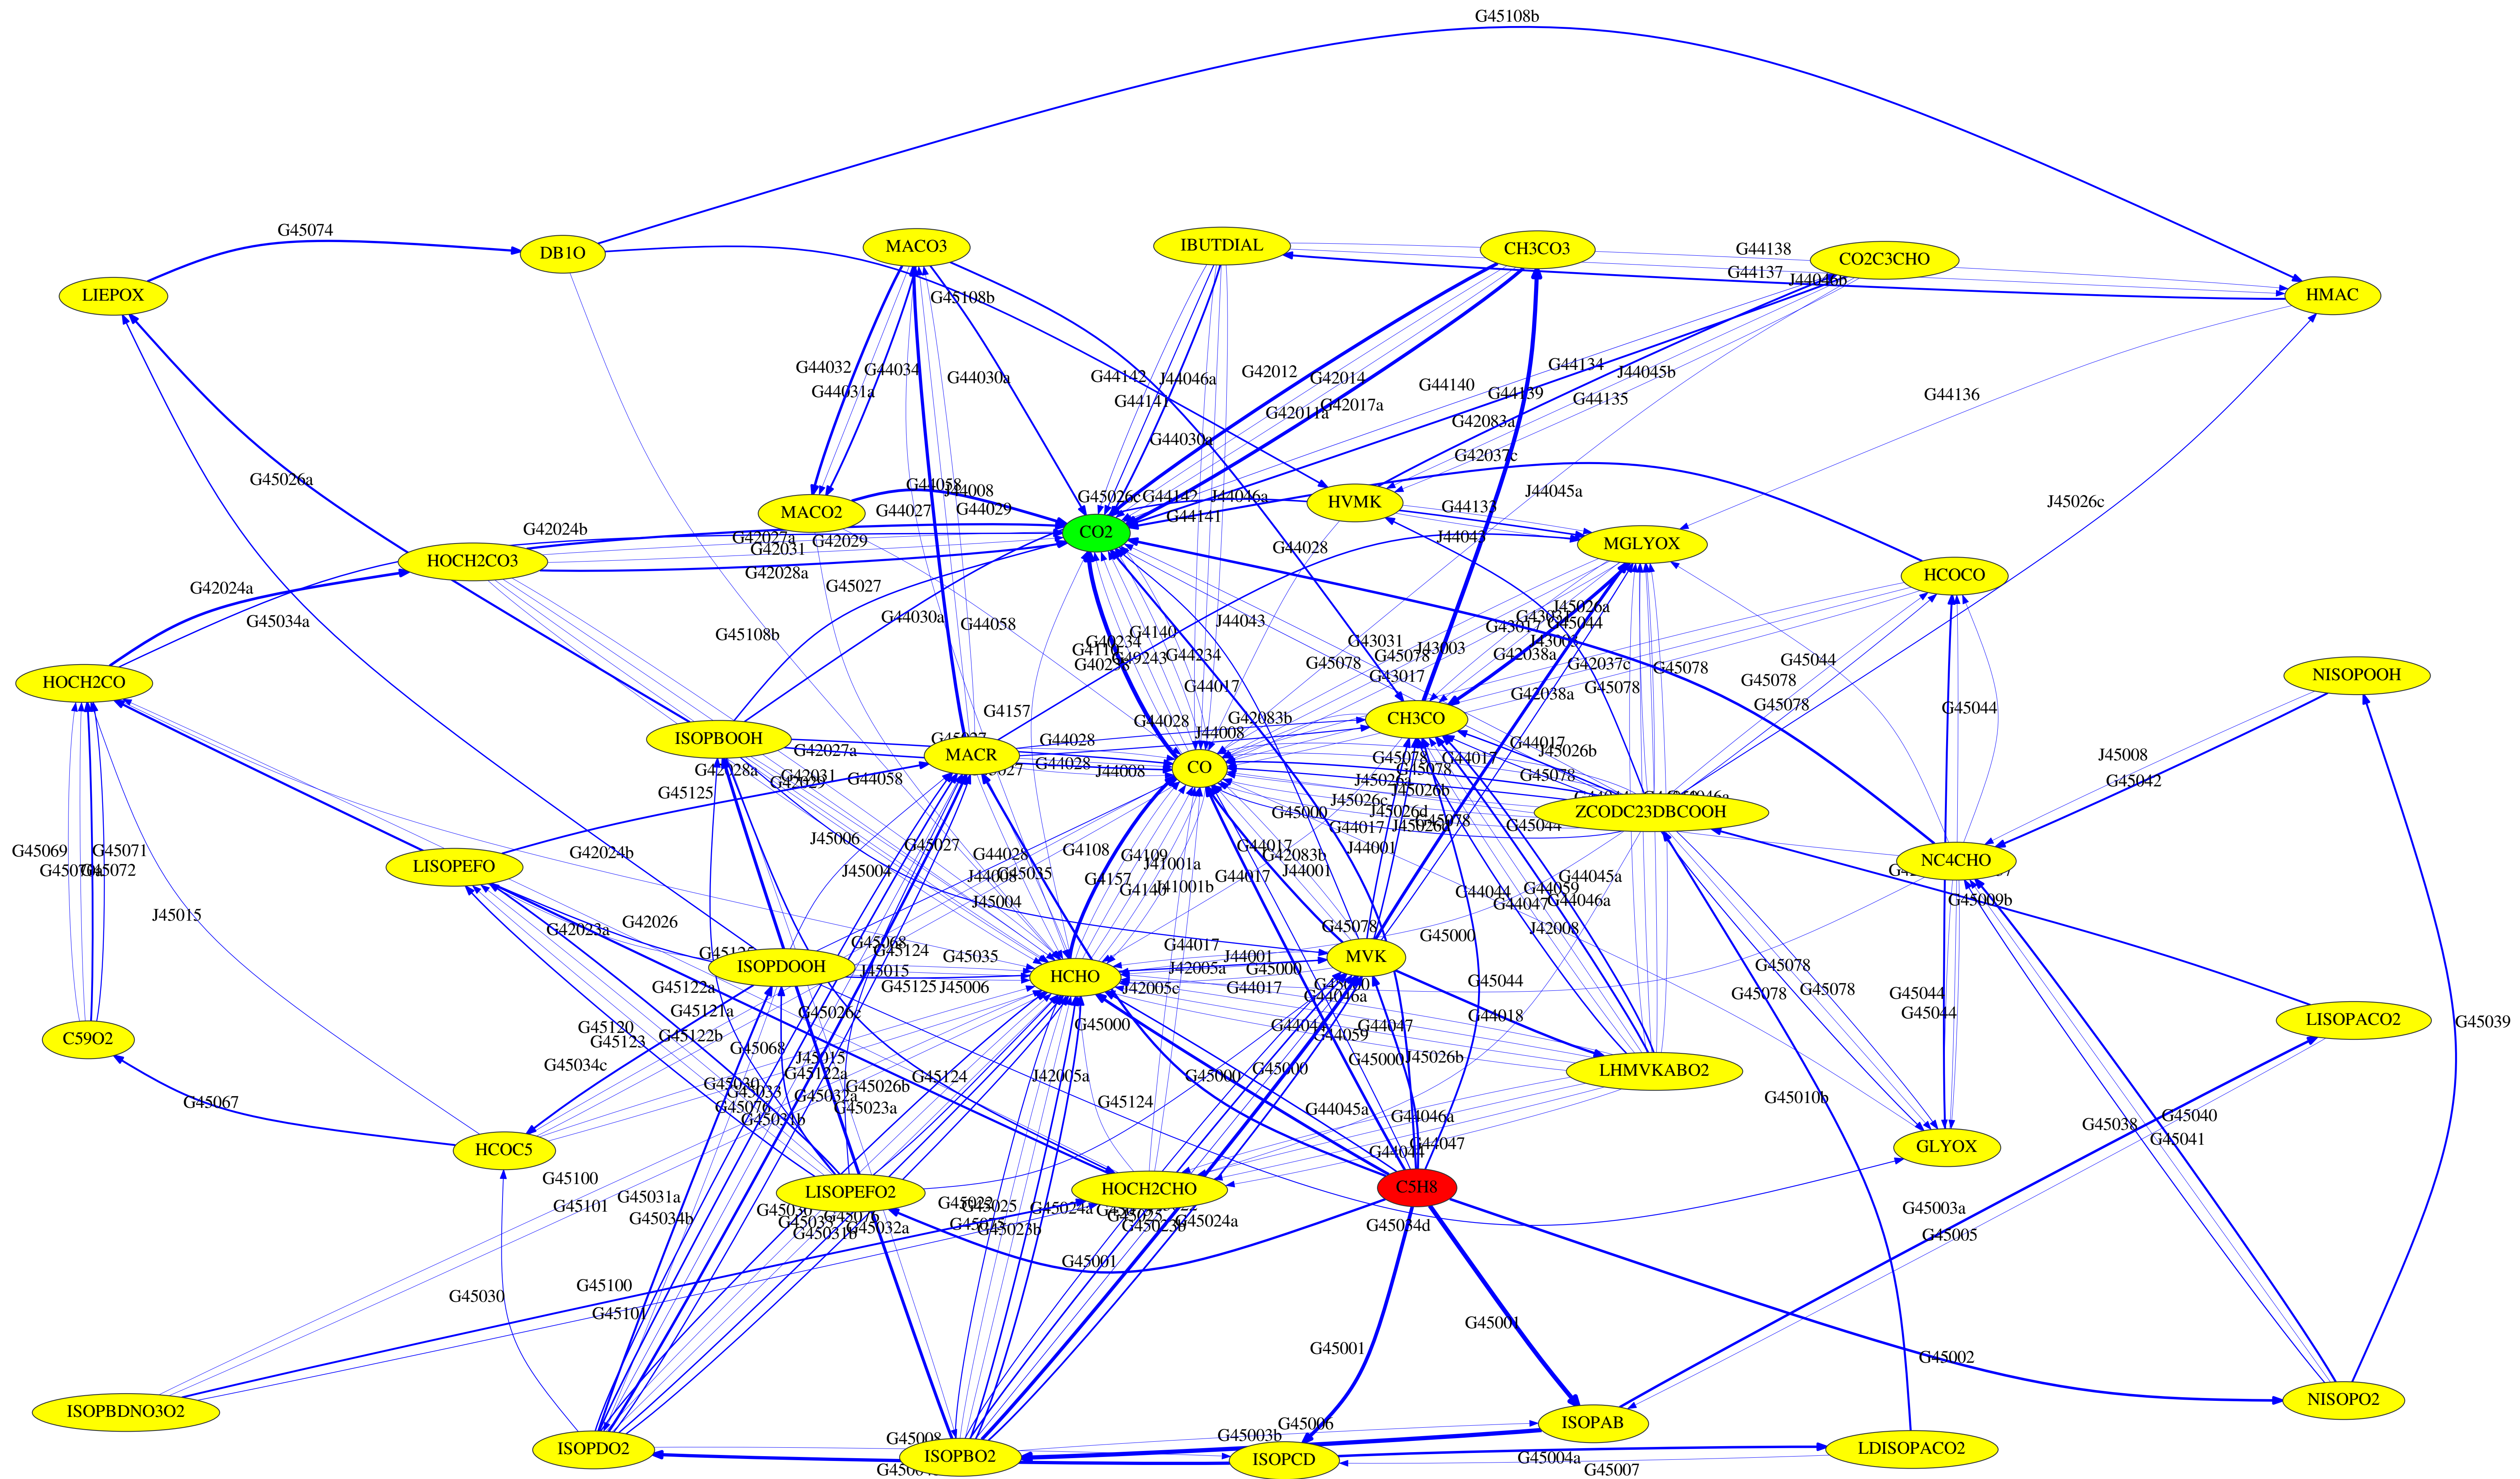

Supplement: Supplementary file 28 [file acp-21-3371-2021-supplement.zip]

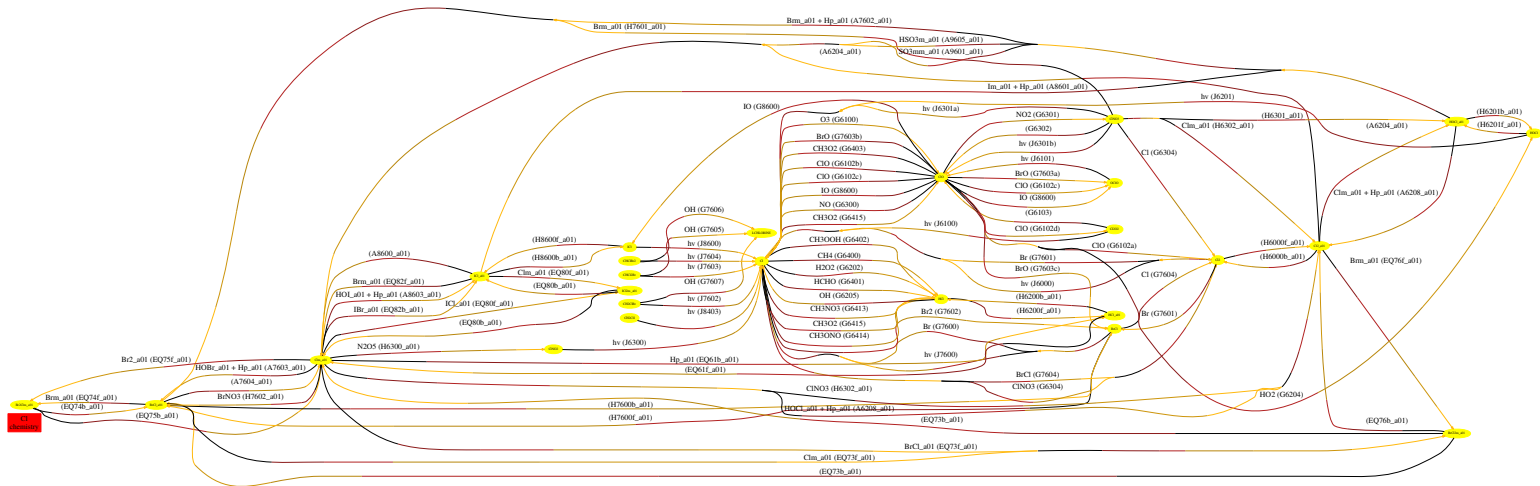

Supplement: Supplementary file 29 [file acp-21-3371-2021-supplement.zip]
